# Supplementary material for: Complete cardiac regeneration in a mouse model of myocardial infarction
Source: Aging (Albany NY). 2012 Dec 31;4(12):966–77. doi: 10.18632/aging.100526 (PMC3615162; doi:10.18632/aging.100526)
Supplement: Supplementary file 2 [file aging-04-966-s002.xlsx]

## Sheet: day1vsday3
Transcript ID	MGI gene symbol	Mean expression	Mean expression P1	Mean expression P3	Fold change P3/P1	log2 fold change P3/P1	p value	p value adjusted *
ENSMUSG00000022877	Hrg	2.27319	0	4.54638	Inf	Inf	0.00572623	0.0433854
ENSMUSG00000028186	Uox	3.07457	0	6.14913	Inf	Inf	0.00106404	0.0110154
ENSMUSG00000054422	Fabp1	7.55539	0.339994	14.7708	43.4443	5.44109	2.60307e-07	6.99293e-06
ENSMUSG00000079015	Serpina1c	4.40351	0.24386	8.56317	35.115	5.13402	0.000249392	0.00322952
ENSMUSG00000090223	Pcp4	10.0475	0.746882	19.3481	25.9052	4.69517	1.06267e-06	2.51607e-05
ENSMUSG00000054932	Afp	93.2762	9.61197	176.94	18.4083	4.20229	2.86034e-51	3.55175e-48
ENSMUSG00000031250	Tnmd	12.9607	1.42687	24.4946	17.1667	4.10154	2.64429e-09	1.00174e-07
ENSMUSG00000078664	Sprr2a1	19.8629	2.44685	37.2789	15.2355	3.92936	2.74518e-09	1.0347e-07
ENSMUSG00000035540	Gc	9.65646	1.36134	17.9516	13.1867	3.72101	1.13076e-06	2.66038e-05
ENSMUSG00000029368	Alb	256.161	36.8393	475.483	12.9069	3.69008	1.02947e-91	4.60195e-88
ENSMUSG00000066366	Serpina1a	9.64327	1.52437	17.7622	11.6522	3.54253	2.49116e-06	5.46416e-05
ENSMUSG00000020609	Apob	12.3027	1.99679	22.6085	11.3225	3.50112	1.68226e-07	4.7059e-06
ENSMUSG00000068014	Gm14648	13.742	2.26989	25.2141	11.1081	3.47354	0.000575388	0.00660189
ENSMUSG00000025013	Tll2	155.962	31.4184	280.506	8.92808	3.15835	3.32514e-44	2.7526e-41
ENSMUSG00000042425	Frmpd3	21.2354	4.6053	37.8655	8.22215	3.03952	6.93948e-09	2.45418e-07
ENSMUSG00000071178	Serpina1b	24.2832	5.52619	43.0402	7.78841	2.96133	1.97065e-11	1.07429e-09
ENSMUSG00000063063	Ctnna2	12.8043	3.1282	22.4804	7.18637	2.84526	3.6011e-06	7.68018e-05
ENSMUSG00000028001	Fga	12.961	3.20079	22.7212	7.09862	2.82754	2.69183e-06	5.85263e-05
ENSMUSG00000033860	Fgg	12.1633	3.08366	21.243	6.88888	2.78427	7.38212e-06	0.000145629
ENSMUSG00000085512	Gm11958	10.3176	2.7423	17.893	6.5248	2.70593	0.000931889	0.00986205
ENSMUSG00000038224	Serpinf2	9.55923	2.58064	16.5378	6.40842	2.67997	0.000197356	0.00264041
ENSMUSG00000028356	Ambp	7.4291	2.04269	12.8155	6.27384	2.64935	0.00068759	0.00768801
ENSMUSG00000095280		8.63766	2.40231	14.873	6.19113	2.6302	0.00265444	0.0235902
ENSMUSG00000022875	Kng1	16.498	4.63863	28.3574	6.11331	2.61195	5.09797e-07	1.29483e-05
ENSMUSG00000091028	Gm10722	56.1168	16.0624	96.1711	5.98734	2.58191	1.29659e-13	1.01329e-11
ENSMUSG00000032083	Apoa1	40.9387	12.2424	69.6349	5.68799	2.50792	1.44906e-14	1.27011e-12
ENSMUSG00000000247	Lhx2	9.58505	3.03776	16.1323	5.3106	2.40888	0.00260817	0.023253
ENSMUSG00000007888	Crlf1	9.33788	2.97911	15.6966	5.2689	2.3975	0.000939535	0.00993826
ENSMUSG00000030110	Ret	443.295	142.128	744.462	5.23796	2.389	1.79516e-53	2.50772e-50
ENSMUSG00000063600	Egfem1	11.7596	3.79425	19.7249	5.19863	2.37813	0.00194928	0.0182984
ENSMUSG00000096385	Gm11168	10.2645	3.42935	17.0997	4.98628	2.31797	0.00177694	0.0169438
ENSMUSG00000020429	Igfbp1	8.47467	2.92063	14.0287	4.80331	2.26403	0.000931707	0.00986205
ENSMUSG00000091639	Gm3756	34.6236	12.1047	57.1425	4.72068	2.23899	1.83455e-05	0.00032935
ENSMUSG00000026971	Itgb6	286.769	104.949	468.589	4.46491	2.15863	3.29485e-38	2.45477e-35
ENSMUSG00000030523	Trpm1	7.31033	2.70601	11.9147	4.40303	2.1385	0.00298414	0.0259124
ENSMUSG00000075014	Gm10800	774.647	287.997	1261.3	4.37955	2.13078	5.56261e-50	5.65135e-47
ENSMUSG00000095891	Gm10106	25.7767	9.59667	41.9568	4.37202	2.1283	5.04255e-06	0.00010359
ENSMUSG00000095891	Gm10716	25.7767	9.59667	41.9568	4.37202	2.1283	5.04255e-06	0.00010359
ENSMUSG00000095891	Gm10717	25.7767	9.59667	41.9568	4.37202	2.1283	5.04255e-06	0.00010359
ENSMUSG00000025127	Gcgr	30.5589	11.3912	49.7265	4.36533	2.12609	7.00929e-10	2.98409e-08
ENSMUSG00000085412	Gm15055	13.218	4.96196	21.4741	4.32774	2.11361	0.00142168	0.0140913
ENSMUSG00000030137	Tuba8	765.075	290.201	1239.95	4.27273	2.09516	6.1613e-46	5.29659e-43
ENSMUSG00000095547	Gm10719	80.1223	30.5987	129.646	4.23698	2.08304	6.6364e-14	5.33562e-12
ENSMUSG00000095547	Gm11167	80.1223	30.5987	129.646	4.23698	2.08304	6.6364e-14	5.33562e-12
ENSMUSG00000090522	Gm5919	20.5894	7.99972	33.1791	4.14753	2.05225	0.000139539	0.00196524
ENSMUSG00000072849	Serpina1e	19.0097	7.58987	30.4296	4.00924	2.00333	6.22612e-06	0.000125144
ENSMUSG00000044499	Hs3st5	26.1108	10.5384	41.6833	3.95538	1.98382	1.23726e-05	0.000230836
ENSMUSG00000096519		80.4495	32.5733	128.326	3.9396	1.97805	5.95262e-12	3.47381e-10
ENSMUSG00000020264	Slc36a2	487.893	198.606	777.18	3.91317	1.96834	2.49227e-37	1.68802e-34
ENSMUSG00000091228	Gm20390	20.69	8.48608	32.894	3.87623	1.95465	0.00248844	0.0223459
ENSMUSG00000019828	Grm1	93.3929	38.5277	148.258	3.84809	1.94414	6.3992e-14	5.18219e-12
ENSMUSG00000062038	Gm10108	86.0182	35.5296	136.507	3.84205	1.94188	1.34267e-09	5.38778e-08
ENSMUSG00000075015	Gm10801	48.5071	20.3291	76.6852	3.77219	1.9154	2.07267e-07	5.65645e-06
ENSMUSG00000091089	A930018M24Rik	22.1325	9.39735	34.8677	3.71037	1.89156	0.000247093	0.00320533
ENSMUSG00000078564	Gm9631	22.452	9.62318	35.2808	3.66623	1.8743	8.34975e-05	0.00124583
ENSMUSG00000033831	Fgb	12.7252	5.46202	19.9884	3.65953	1.87166	0.000394829	0.00476502
ENSMUSG00000030048	Gkn3	20.3513	8.73955	31.963	3.65729	1.87077	9.5823e-05	0.00140075
ENSMUSG00000061068	Mcpt4	89.5824	38.9612	140.204	3.59854	1.84741	1.44109e-16	1.70422e-14
ENSMUSG00000027249	F2	8.08974	3.53509	12.6444	3.57682	1.83868	0.00642663	0.0473909
ENSMUSG00000027875	Hmgcs2	28787.9	12653.5	44922.4	3.5502	1.8279	1.43573e-64	2.91727e-61
ENSMUSG00000095186	Gm10718	79.1948	35.313	123.076	3.4853	1.80128	2.09394e-09	8.12529e-08
ENSMUSG00000084929	4732418A04Rik	36.3978	16.2878	56.5077	3.46932	1.79465	1.47196e-05	0.00026967
ENSMUSG00000062542	Syt9	17.4047	7.79904	27.0104	3.4633	1.79215	0.000534138	0.00618255
ENSMUSG00000061808	Ttr	67.6219	30.5859	104.658	3.42176	1.77474	4.41984e-12	2.62037e-10
ENSMUSG00000037005	Xpnpep2	51.4756	23.411	79.5403	3.39756	1.7645	1.46397e-07	4.18431e-06
ENSMUSG00000074852	Hpse2	35.7183	16.2543	55.1823	3.39494	1.76339	2.62938e-05	0.00045103
ENSMUSG00000063727	Tnfrsf11b	78.5762	36.14	121.012	3.34843	1.74349	3.56911e-10	1.5828e-08
ENSMUSG00000027577	Chrna4	33.3533	15.3836	51.3231	3.33622	1.73821	2.32814e-05	0.000405584
ENSMUSG00000090340	C030048H21Rik	30.3301	14.6032	46.0569	3.1539	1.65714	5.95082e-05	0.000933382
ENSMUSG00000028386	Slc46a2	23.0831	11.135	35.0312	3.14605	1.65354	0.000435359	0.00515671
ENSMUSG00000038292	Ccdc155	29.6461	14.365	44.9272	3.12755	1.64503	0.000905105	0.00962875
ENSMUSG00000037991	A630055G03Rik	446.326	216.306	676.346	3.12681	1.64469	9.41302e-24	3.14016e-21
ENSMUSG00000075027	4631405J19Rik	941.915	457.432	1426.4	3.11827	1.64075	4.045e-33	2.58314e-30
ENSMUSG00000051067	Lingo3	333.16	161.897	504.423	3.1157	1.63956	9.77879e-24	3.2142e-21
ENSMUSG00000026255	Efhd1	76.6735	37.3712	115.976	3.10334	1.63382	1.66804e-09	6.56381e-08
ENSMUSG00000027559	Car3	103.297	50.427	156.168	3.09691	1.63083	1.05892e-19	2.04034e-17
ENSMUSG00000008489	Elavl2	146.191	71.7905	220.591	3.0727	1.61951	3.32555e-15	3.28891e-13
ENSMUSG00000058914	C1qtnf3	52.3797	26.2239	78.5354	2.9948	1.58246	1.15332e-09	4.704e-08
ENSMUSG00000073608	Gm6086	180.468	90.8692	270.066	2.97203	1.57145	3.58585e-13	2.65388e-11
ENSMUSG00000037010	Apln	3046.15	1540.54	4551.75	2.95465	1.56299	3.86187e-46	3.45267e-43
ENSMUSG00000040205	Cuzd1	62.8946	31.9363	93.853	2.93875	1.5552	2.38618e-06	5.2649e-05
ENSMUSG00000000889	Dbh	253.708	129.285	378.131	2.92479	1.54833	2.94135e-17	3.96037e-15
ENSMUSG00000040536	Necab1	97.2889	49.6461	144.932	2.9193	1.54562	2.58279e-11	1.38105e-09
ENSMUSG00000078521	2610002D18Rik	218.293	111.56	325.026	2.91346	1.54273	3.56367e-15	3.47823e-13
ENSMUSG00000021456	Fbp2	821.115	422.241	1219.99	2.88931	1.53073	2.99362e-31	1.71565e-28
ENSMUSG00000000049	Apoh	11.5962	6.01823	17.1741	2.85368	1.51282	0.00331667	0.0281331
ENSMUSG00000068587	Mgam	31.277	16.4258	46.1282	2.80828	1.48969	4.67744e-05	0.000754841
ENSMUSG00000055210	Foxd2	25.8953	13.6067	38.1838	2.80624	1.48864	0.00115102	0.0117312
ENSMUSG00000094365		33.4912	17.762	49.2205	2.77112	1.47047	0.00176634	0.0168572
ENSMUSG00000066975	Cryba4	86.915	46.1222	127.708	2.7689	1.46932	6.49274e-07	1.60708e-05
ENSMUSG00000015843	Rxrg	368.654	195.993	541.315	2.7619	1.46566	2.92531e-21	7.26485e-19
ENSMUSG00000027490	E2f1	2444.67	1300.66	3588.68	2.75912	1.46421	1.09358e-29	5.55513e-27
ENSMUSG00000090291	Lrrc10b	23.0677	12.3874	33.748	2.72437	1.44592	0.00478653	0.037739
ENSMUSG00000078240	Gm3550	81.0239	43.5209	118.527	2.72344	1.44543	2.15177e-06	4.78075e-05
ENSMUSG00000092200	Tnxa	19.1339	10.3963	27.8715	2.6809	1.42272	0.00280177	0.0246642
ENSMUSG00000072674	Gm10393	43.8692	23.9589	63.7795	2.66204	1.41253	0.000411659	0.0049388
ENSMUSG00000054999	Naaladl1	139.209	76.1582	202.259	2.65577	1.40913	8.50757e-09	2.92093e-07
ENSMUSG00000001228	Uhrf1	5687.48	3117.65	8257.31	2.64857	1.40521	1.21485e-30	6.6227e-28
ENSMUSG00000034990	Otoa	261.517	143.63	379.404	2.64155	1.40138	1.37651e-16	1.63651e-14
ENSMUSG00000060512	0610040J01Rik	46.5913	25.5916	67.591	2.64114	1.40116	0.00027528	0.0035199
ENSMUSG00000088781		20.5501	11.3339	29.7663	2.62631	1.39304	0.00368764	0.0306403
ENSMUSG00000034883	Lrr1	220.31	122.133	318.488	2.60772	1.38279	3.74245e-13	2.75157e-11
ENSMUSG00000002870	Mcm2	7068.98	3921.85	10216.1	2.60492	1.38124	8.25872e-31	4.61477e-28
ENSMUSG00000050410	Tcf19	2700.93	1498.52	3903.33	2.60478	1.38116	1.56253e-29	7.59219e-27
ENSMUSG00000052135	Foxo6	258.149	143.836	372.462	2.58948	1.37266	4.06817e-15	3.90247e-13
ENSMUSG00000028341	Nr4a3	269.798	150.742	388.855	2.57961	1.36715	3.08391e-21	7.49222e-19
ENSMUSG00000018983	E2f2	811.44	454.701	1168.18	2.56911	1.36127	4.70498e-21	1.10696e-18
ENSMUSG00000046345	2310010M20Rik	158.878	89.0475	228.708	2.56838	1.36086	1.40809e-09	5.61002e-08
ENSMUSG00000073705	Apitd1	399.097	223.732	574.462	2.56764	1.36044	2.35876e-16	2.68983e-14
ENSMUSG00000078815	Cacng6	599.577	337.144	862.011	2.5568	1.35434	1.23718e-21	3.25319e-19
ENSMUSG00000029359	Tesc	909	512.025	1305.97	2.5506	1.35084	6.40449e-24	2.24842e-21
ENSMUSG00000027386	Fbln7	54.4631	30.7337	78.1926	2.5442	1.34721	8.80644e-05	0.00130353
ENSMUSG00000079537	C030048H21Rik	39.8246	22.4901	57.1591	2.54152	1.34569	4.72706e-05	0.000760652
ENSMUSG00000044667	D3Bwg0562e	72.3525	40.8748	103.83	2.5402	1.34494	1.20391e-05	0.000225554
ENSMUSG00000022422	Dscc1	376.722	213.494	539.949	2.5291	1.33862	6.78209e-17	8.61287e-15
ENSMUSG00000020974	Pole2	745.569	422.577	1068.56	2.52868	1.33838	5.00704e-22	1.41661e-19
ENSMUSG00000005410	Mcm5	5208.1	2952.5	7463.69	2.52792	1.33795	4.75963e-29	2.26346e-26
ENSMUSG00000040204	2810417H13Rik	3330.9	1891.05	4770.76	2.52281	1.33503	6.11251e-29	2.84626e-26
ENSMUSG00000020649	Rrm2	10026.7	5702.65	14350.8	2.51651	1.33142	2.16108e-28	9.85762e-26
ENSMUSG00000086384	Gm12357	298.785	170.05	427.519	2.51407	1.33003	4.81548e-16	5.27602e-14
ENSMUSG00000078648	Gm17546	24.0611	13.7086	34.4137	2.51038	1.32791	0.00407743	0.0331761
ENSMUSG00000028434	Epb4.1l4b	627.628	358.527	896.729	2.50115	1.32259	8.25295e-22	2.2773e-19
ENSMUSG00000046057	Gm15428	62.4609	35.7318	89.1901	2.4961	1.31968	5.65866e-05	0.000892567
ENSMUSG00000017499	Cdc6	999.135	572.938	1425.33	2.48776	1.31485	8.93511e-22	2.43547e-19
ENSMUSG00000070570	Slc17a7	231.805	133.225	330.385	2.47991	1.31029	4.34876e-12	2.59198e-10
ENSMUSG00000096789		34.0917	19.611	48.5723	2.47679	1.30847	0.00611379	0.0455346
ENSMUSG00000087213	2810408I11Rik	101.563	58.5589	144.566	2.46874	1.30377	5.153e-06	0.000105471
ENSMUSG00000000028	Cdc45	1636.63	945.45	2327.81	2.46211	1.2999	6.43813e-24	2.24842e-21
ENSMUSG00000022763	Aifm3	77.0293	44.6464	109.412	2.45064	1.29316	1.41412e-05	0.000260568
ENSMUSG00000022431	Ribc2	23.4861	13.6483	33.3239	2.44161	1.28783	0.00404955	0.0330214
ENSMUSG00000031637	Lrp2bp	199.636	116.158	283.115	2.43733	1.2853	9.85327e-11	4.81904e-09
ENSMUSG00000086103	Gm11832	52.3766	30.4937	74.2594	2.43524	1.28406	0.000196561	0.00263232
ENSMUSG00000083668	Gm5648	108.542	63.2648	153.819	2.43135	1.28176	8.57041e-07	2.06642e-05
ENSMUSG00000000120	Ngfr	371.949	216.88	527.018	2.43	1.28096	3.77952e-15	3.64121e-13
ENSMUSG00000027323	Rad51	1579.34	925.909	2232.76	2.41143	1.26989	7.9334e-23	2.42903e-20
ENSMUSG00000001027	Scn4a	324.76	190.57	458.95	2.40831	1.26802	1.42773e-15	1.47056e-13
ENSMUSG00000078452	Raet1d	92.382	54.7532	130.011	2.37448	1.24761	6.67583e-07	1.64511e-05
ENSMUSG00000021485	Mxd3	1111.44	659.914	1562.97	2.36845	1.24394	1.02872e-20	2.27653e-18
ENSMUSG00000059027	9630013D21Rik	209.426	124.494	294.358	2.36444	1.2415	8.35161e-11	4.13444e-09
ENSMUSG00000032313	AI118078	80.4354	47.8821	112.989	2.35973	1.23862	4.74576e-06	9.83974e-05
ENSMUSG00000005470	Asf1b	1898.47	1134.58	2662.35	2.34655	1.23054	5.10602e-21	1.17654e-18
ENSMUSG00000022033	Pbk	2050.1	1225.75	2874.44	2.34504	1.22961	5.96001e-23	1.85017e-20
ENSMUSG00000045776	Lrtm1	2144.03	1284.68	3003.38	2.33785	1.22518	3.7343e-27	1.6051e-24
ENSMUSG00000015354	Pcolce2	258.819	155.108	362.529	2.33727	1.22482	1.87714e-13	1.43194e-11
ENSMUSG00000024210	Ip6k3	461.464	276.749	646.179	2.33489	1.22335	6.09431e-16	6.61233e-14
ENSMUSG00000037813	D630003M21Rik	848.539	508.963	1188.12	2.33439	1.22304	2.14603e-19	4.03514e-17
ENSMUSG00000022766	Serpind1	37.8146	22.7045	52.9246	2.33102	1.22096	0.000420034	0.00502042
ENSMUSG00000042489	Clspn	2156.66	1294.95	3018.37	2.33088	1.22088	1.16993e-21	3.1505e-19
ENSMUSG00000086291	Gm15513	40.2197	24.162	56.2773	2.32916	1.21981	0.00061139	0.00697203
ENSMUSG00000059060	Rad51l1	107.477	64.5755	150.378	2.32872	1.21954	2.05792e-06	4.59966e-05
ENSMUSG00000040258	Nxph4	46.8986	28.1789	65.6183	2.32863	1.21948	0.000702844	0.00782334
ENSMUSG00000085252	8430437L04Rik	27.2309	16.3671	38.0946	2.32752	1.21879	0.00552369	0.0423098
ENSMUSG00000037362	Nov	1990.1	1196.92	2783.28	2.32537	1.21746	9.09206e-25	3.38694e-22
ENSMUSG00000023336	Wfdc1	1038.91	624.94	1452.87	2.32482	1.21712	9.91748e-20	1.92753e-17
ENSMUSG00000022525	Hrasls	47.4275	28.5316	66.3233	2.32455	1.21695	0.000697807	0.00777889
ENSMUSG00000043333	Rhbdl2	69.8513	42.026	97.6766	2.32419	1.21673	1.10886e-05	0.000209233
ENSMUSG00000017344	Vtn	355.313	214.163	496.463	2.31816	1.21298	5.60779e-14	4.5912e-12
ENSMUSG00000032815	Fanca	1688.04	1017.56	2358.53	2.31783	1.21278	1.94029e-21	4.98477e-19
ENSMUSG00000030346	Rad51ap1	1171.21	706.491	1635.92	2.31556	1.21136	1.32354e-20	2.87208e-18
ENSMUSG00000022945	Chaf1b	1256.48	757.97	1754.99	2.31538	1.21125	3.05039e-19	5.58846e-17
ENSMUSG00000037466	4930427A07Rik	889.497	537.116	1241.88	2.31212	1.20922	2.67606e-18	4.36588e-16
ENSMUSG00000070732	Rbm44	257.389	155.46	359.318	2.31132	1.20872	3.53515e-11	1.87237e-09
ENSMUSG00000056359	D830013O20Rik	28.0825	17.0151	39.1499	2.30089	1.20219	0.00209865	0.0194635
ENSMUSG00000049556	Lingo1	270.11	164.043	376.177	2.29316	1.19733	4.13645e-12	2.47203e-10
ENSMUSG00000020961	Ston2	113.058	68.7436	157.372	2.28926	1.19488	5.22484e-07	1.32404e-05
ENSMUSG00000030739	Myh14	636.996	387.593	886.399	2.28693	1.19341	6.33621e-18	9.31715e-16
ENSMUSG00000087236	Gm1305	47.0378	28.6447	65.4309	2.28423	1.19171	0.000707527	0.00786763
ENSMUSG00000038801	Scgb1c1	116.228	70.8148	161.641	2.28259	1.19067	1.30376e-06	3.03546e-05
ENSMUSG00000043557	Mdga1	1188.71	724.869	1652.54	2.27978	1.1889	3.19528e-22	9.40313e-20
ENSMUSG00000025395	Prim1	2186.63	1334.81	3038.46	2.27633	1.18671	4.81683e-21	1.12147e-18
ENSMUSG00000028551	Cdkn2c	2731.26	1667.65	3794.87	2.27558	1.18624	3.19734e-22	9.40313e-20
ENSMUSG00000030731	Syt3	82.5806	50.452	114.709	2.27363	1.18499	9.71579e-05	0.00141748
ENSMUSG00000007080	Pole	2978.01	1820.39	4135.63	2.27184	1.18386	2.69336e-21	6.76395e-19
ENSMUSG00000075502	Gm5465	98.1953	60.0444	136.346	2.27076	1.18317	5.57093e-07	1.39906e-05
ENSMUSG00000087060	2810442I21Rik	237.183	145.076	329.289	2.26978	1.18255	3.48324e-11	1.84926e-09
ENSMUSG00000048038	4932418E24Rik	77.7788	47.5887	107.969	2.26879	1.18192	6.6294e-06	0.00013218
ENSMUSG00000026407	Cacna1s	106.983	65.5376	148.427	2.26477	1.17936	1.61442e-07	4.55329e-06
ENSMUSG00000046179	E2f8	1729.68	1059.73	2399.64	2.26439	1.17912	1.68364e-18	2.8294e-16
ENSMUSG00000027454	Gins1	700.436	429.139	971.734	2.26438	1.17912	1.25209e-15	1.30165e-13
ENSMUSG00000026202	Tuba4a	14355.2	8807.43	19902.9	2.25978	1.17619	1.40535e-24	5.14936e-22
ENSMUSG00000032482	Cspg5	112.975	69.7647	156.185	2.23874	1.16269	1.71063e-07	4.76738e-06
ENSMUSG00000048478	4732415M23Rik	218.608	135.074	302.142	2.23686	1.16147	1.54053e-09	6.09421e-08
ENSMUSG00000071347	C1qtnf9	647.336	400.686	893.985	2.23114	1.15778	8.6446e-17	1.09161e-14
ENSMUSG00000025150	Cbr2	48.0673	29.7814	66.3532	2.22801	1.15576	0.000330441	0.00410316
ENSMUSG00000006585	Cdt1	2284.96	1417.26	3152.65	2.22446	1.15345	3.13976e-18	5.01262e-16
ENSMUSG00000041859	Mcm3	5491.63	3407.19	7576.08	2.22355	1.15287	4.37952e-22	1.25496e-19
ENSMUSG00000002835	Chaf1a	1753.5	1088.68	2418.32	2.22133	1.15142	6.36065e-19	1.11942e-16
ENSMUSG00000017861	Mybl2	1209.03	751.056	1667	2.21954	1.15026	9.59844e-18	1.37522e-15
ENSMUSG00000046295	Ankle1	1169.03	726.245	1611.81	2.21938	1.15016	1.89548e-17	2.61517e-15
ENSMUSG00000037474	Dtl	1975.99	1227.6	2724.39	2.21928	1.15009	7.64439e-20	1.49877e-17
ENSMUSG00000000392	Fap	529.4	329.357	729.442	2.21475	1.14714	9.05854e-18	1.30624e-15
ENSMUSG00000019773	Fbxo5	1371.34	855.631	1887.05	2.20545	1.14107	2.74282e-19	5.06651e-17
ENSMUSG00000035683	Melk	1466.99	915.399	2018.58	2.20514	1.14087	4.38129e-19	7.96149e-17
ENSMUSG00000059408	Mrgprh	53.539	33.4257	73.6523	2.20346	1.13977	0.000358561	0.00439615
ENSMUSG00000074476	Spc24	1320.83	824.835	1816.83	2.20266	1.13925	7.9599e-19	1.37916e-16
ENSMUSG00000072437	Nanos1	152.025	94.9502	209.1	2.2022	1.13895	4.51135e-07	1.15634e-05
ENSMUSG00000030724	Cd19	55.559	34.7227	76.3952	2.20015	1.1376	0.00121047	0.0122753
ENSMUSG00000031700	Gpt2	1233.36	771.809	1694.91	2.19603	1.1349	1.98699e-20	4.11215e-18
ENSMUSG00000056973	Ces1d	55.4018	34.6849	76.1187	2.19458	1.13395	0.000780986	0.00851919
ENSMUSG00000042498	D330045A20Rik	77.2929	48.4201	106.166	2.19259	1.13264	7.91433e-05	0.0011912
ENSMUSG00000054196	Cthrc1	502.246	314.672	689.819	2.19218	1.13237	3.07335e-20	6.18851e-18
ENSMUSG00000039198	Ptchd3	69.0681	43.3171	94.8191	2.18896	1.13024	0.000188008	0.002536
ENSMUSG00000026669	Mcm10	949.767	595.804	1303.73	2.18819	1.12974	1.28893e-16	1.55724e-14
ENSMUSG00000056394	Lig1	4548.82	2856.16	6241.49	2.18528	1.12782	3.0312e-21	7.4451e-19
ENSMUSG00000022034	Esco2	2133.24	1339.91	2926.56	2.18415	1.12708	4.11881e-20	8.2196e-18
ENSMUSG00000044285	Gm1821	295.632	185.751	405.513	2.18311	1.12638	5.19699e-09	1.89491e-07
ENSMUSG00000018411	Mapt	446.164	280.57	611.757	2.18041	1.1246	1.27069e-16	1.54355e-14
ENSMUSG00000036412	Arsi	95.5433	60.1323	130.954	2.17777	1.12285	1.31267e-06	3.05301e-05
ENSMUSG00000026196	Bard1	1406.21	886.259	1926.16	2.17336	1.11993	1.84759e-18	3.08175e-16
ENSMUSG00000032221	Mns1	541.254	341.179	741.328	2.17284	1.11958	6.77195e-13	4.70062e-11
ENSMUSG00000031821	Gins2	1034.68	652.31	1417.05	2.17236	1.11927	2.26263e-16	2.60681e-14
ENSMUSG00000034413	Neurl1b	4076.19	2569.92	5582.46	2.17223	1.11918	2.48569e-21	6.31337e-19
ENSMUSG00000031980	Agt	317.369	200.17	434.568	2.171	1.11836	1.26888e-10	6.08599e-09
ENSMUSG00000024791	Cdca5	870.639	549.22	1192.06	2.17046	1.118	3.67727e-15	3.55804e-13
ENSMUSG00000022899	Slc15a2	514.025	324.366	703.684	2.16941	1.1173	5.28515e-25	2.07243e-22
ENSMUSG00000032537	Ephb1	465.22	293.961	636.479	2.16518	1.11449	6.7502e-15	6.36598e-13
ENSMUSG00000051811	Cox6b2	468.257	296.17	640.345	2.16209	1.11242	1.35998e-13	1.05912e-11
ENSMUSG00000039055	Eme1	427.977	270.694	585.26	2.16207	1.11241	1.65319e-11	9.10107e-10
ENSMUSG00000025784	Clec3b	821.121	520.027	1122.22	2.15799	1.10969	8.85133e-17	1.11144e-14
ENSMUSG00000026355	Mcm6	8363.84	5297.19	11430.5	2.15784	1.10959	5.26611e-21	1.20105e-18
ENSMUSG00000023908	Pkmyt1	1219.27	773.267	1665.27	2.15356	1.10672	7.49946e-15	6.98418e-13
ENSMUSG00000039774	Galnt12	95.9601	60.9375	130.983	2.14946	1.10398	1.91922e-05	0.000343172
ENSMUSG00000002068	Ccne1	1080.78	686.719	1474.85	2.14768	1.10278	2.25079e-14	1.9349e-12
ENSMUSG00000050822	Slc29a4	71.8988	45.7153	98.0822	2.1455	1.10132	0.000296112	0.00373994
ENSMUSG00000056174	Col8a2	199.646	126.962	272.329	2.14496	1.10095	1.06857e-11	6.00091e-10
ENSMUSG00000001517	Foxm1	4835.27	3078.37	6592.17	2.14145	1.09859	1.83995e-20	3.84343e-18
ENSMUSG00000024742	Fen1	221.991	141.517	302.464	2.1373	1.09579	1.5171e-09	6.01217e-08
ENSMUSG00000056904	Gm5620	50.8237	32.4307	69.2168	2.1343	1.09376	0.00509241	0.0396173
ENSMUSG00000025701	Alox5	871.182	556.084	1186.28	2.13327	1.09307	2.08702e-16	2.42952e-14
ENSMUSG00000029414	Kntc1	2290.77	1464.35	3117.19	2.12872	1.08998	1.14917e-18	1.97577e-16
ENSMUSG00000044770	Scml4	488.66	312.594	664.727	2.12649	1.08847	1.52821e-12	1.00462e-10
ENSMUSG00000000402	Egfl6	34.7539	22.2531	47.2546	2.12351	1.08645	0.00397921	0.0325666
ENSMUSG00000024691	Fam111a	3191.05	2043.52	4338.58	2.1231	1.08617	3.2909e-21	7.90913e-19
ENSMUSG00000039748	Exo1	804.703	516.315	1093.09	2.1171	1.08209	5.02537e-14	4.12949e-12
ENSMUSG00000025001	Hells	2359.02	1513.69	3204.35	2.11691	1.08196	1.21684e-18	2.07615e-16
ENSMUSG00000023274	Cd4	57.2238	36.7554	77.6922	2.11376	1.07981	0.000192091	0.00257709
ENSMUSG00000015852	Fcrls	448.493	288.135	608.851	2.11307	1.07934	4.92731e-13	3.52982e-11
ENSMUSG00000020185	E2f7	1643.09	1055.83	2230.35	2.11242	1.0789	2.67162e-16	3.01583e-14
ENSMUSG00000085876	Gm12409	95.1332	61.1528	129.114	2.11133	1.07815	0.000167006	0.00228582
ENSMUSG00000027996	Sfrp2	1731.74	1113.36	2350.11	2.11083	1.07781	1.18022e-29	5.86201e-27
ENSMUSG00000021707	Dhfr	1933.26	1243.04	2623.47	2.11052	1.0776	4.95677e-18	7.48573e-16
ENSMUSG00000013584	Aldh1a2	3817.16	2455.04	5179.29	2.10966	1.07701	1.39014e-21	3.6129e-19
ENSMUSG00000028212	Ccne2	1803.09	1159.74	2446.43	2.10945	1.07687	2.17206e-17	2.96023e-15
ENSMUSG00000029283	Cdc7	1646.56	1060.41	2232.71	2.10552	1.07418	3.75082e-16	4.17087e-14
ENSMUSG00000021175	Cdca7l	472.141	304.294	639.989	2.10319	1.07258	7.6056e-12	4.38126e-10
ENSMUSG00000020297	Nsg2	107.957	69.6074	146.307	2.10189	1.07169	4.10291e-06	8.65134e-05
ENSMUSG00000058290	Espl1	2738.16	1765.95	3710.37	2.10107	1.07112	1.33837e-18	2.26621e-16
ENSMUSG00000020897	Aurkb	2215.83	1429.54	3002.12	2.10006	1.07043	4.87036e-18	7.40526e-16
ENSMUSG00000023176	Cpn2	39.9462	25.7756	54.1168	2.09953	1.07007	0.00163647	0.0158204
ENSMUSG00000028919	Arhgef19	665.48	430.089	900.87	2.09461	1.06668	1.40104e-12	9.2647e-11
ENSMUSG00000034057	Gm239	65.8698	42.5749	89.1646	2.0943	1.06647	0.000679272	0.00761405
ENSMUSG00000076617	Ighm	229.619	148.444	310.794	2.09368	1.06604	7.55011e-08	2.25605e-06
ENSMUSG00000054958	Nt5c1a	539.297	349.293	729.301	2.08793	1.06208	5.24026e-13	3.70296e-11
ENSMUSG00000051220	Ercc6l	1183.58	766.765	1600.4	2.08722	1.06158	1.61952e-15	1.66046e-13
ENSMUSG00000034773	BC030867	466.386	302.154	630.619	2.08708	1.06148	9.87412e-13	6.7081e-11
ENSMUSG00000017417	Plxdc1	428.216	277.484	578.949	2.08642	1.06103	1.25441e-12	8.36937e-11
ENSMUSG00000035455	Fignl1	2711.39	1760	3662.79	2.08113	1.05736	1.67294e-17	2.33699e-15
ENSMUSG00000060716	Plekhh1	4175.87	2711.61	5640.12	2.07999	1.05658	8.76896e-24	2.96962e-21
ENSMUSG00000029442	Wdr66	279.164	181.424	376.904	2.07748	1.05483	9.91304e-10	4.07291e-08
ENSMUSG00000084129	Hmgb1-ps1	95.2381	61.9643	128.512	2.07397	1.05239	2.70247e-05	0.000462149
ENSMUSG00000021364	Elovl2	78.8831	51.3507	106.415	2.07233	1.05125	8.62602e-05	0.0012818
ENSMUSG00000020331	Hcn2	442.98	288.413	597.548	2.07185	1.05092	7.68799e-12	4.41733e-10
ENSMUSG00000021714	Cenpk	609.331	397.03	821.633	2.06945	1.04925	2.44897e-13	1.84299e-11
ENSMUSG00000096768		6271.02	4087.54	8454.5	2.06836	1.04849	1.69201e-15	1.72685e-13
ENSMUSG00000029366	Dck	2060.5	1344.27	2776.73	2.0656	1.04656	3.33928e-17	4.46924e-15
ENSMUSG00000026955	2010317E24Rik	553.303	361.291	745.316	2.06292	1.04469	3.87105e-12	2.34476e-10
ENSMUSG00000021678	F2rl1	107.63	70.3205	144.939	2.06113	1.04343	4.79483e-06	9.93227e-05
ENSMUSG00000022322	Shcbp1	1724.55	1127.51	2321.59	2.05904	1.04197	1.07241e-16	1.32428e-14
ENSMUSG00000070000	Fcho1	97.372	63.7156	131.028	2.05646	1.04016	0.000129197	0.00183345
ENSMUSG00000035606	Ky	2839.12	1860.38	3817.86	2.05219	1.03716	5.22194e-18	7.83326e-16
ENSMUSG00000036223	Ska1	634.077	415.598	852.556	2.0514	1.03661	1.47619e-13	1.14564e-11
ENSMUSG00000024109	Nrxn1	118.8	77.8725	159.728	2.05115	1.03643	8.53874e-07	2.06101e-05
ENSMUSG00000036875	Dna2	1775.01	1163.85	2386.18	2.05025	1.0358	1.38373e-15	1.43184e-13
ENSMUSG00000027239	Mdk	2012.34	1319.81	2704.87	2.04944	1.03523	3.21036e-18	5.089e-16
ENSMUSG00000068101	Cenpm	766.172	502.536	1029.81	2.04922	1.03507	4.83412e-12	2.83749e-10
ENSMUSG00000027342	Pcna	7940.77	5210.51	10671	2.04798	1.0342	2.14837e-19	4.03514e-17
ENSMUSG00000046070	Igfals	65.2263	42.825	87.6276	2.04618	1.03293	0.000347148	0.00427735
ENSMUSG00000081123	Gm11469	34.2125	22.4787	45.9464	2.04399	1.03139	0.00458829	0.036405
ENSMUSG00000032113	Chek1	1322.8	869.129	1776.46	2.04396	1.03136	1.21134e-15	1.27111e-13
ENSMUSG00000045273	Cenph	487.224	320.244	654.204	2.04283	1.03057	3.7738e-12	2.29832e-10
ENSMUSG00000055567	Unc80	19.6839	12.9585	26.4093	2.03798	1.02714	0.00618193	0.045988
ENSMUSG00000039994	Timeless	2721.07	1791.57	3650.58	2.03765	1.02691	1.13316e-16	1.39161e-14
ENSMUSG00000078773	Rad54b	568.028	374.103	761.954	2.03675	1.02627	1.8047e-12	1.16581e-10
ENSMUSG00000002274	Metrn	930.365	612.991	1247.74	2.03549	1.02538	4.69661e-13	3.38626e-11
ENSMUSG00000079560	Hoxa3	52.5049	34.607	70.4027	2.03435	1.02457	0.000981955	0.0103186
ENSMUSG00000064032	Gm10143	47.8813	31.5879	64.1748	2.03162	1.02263	0.00222246	0.020375
ENSMUSG00000007097	Atp1a2	18956.4	12506.7	25406.1	2.03139	1.02247	7.17852e-19	1.25349e-16
ENSMUSG00000028702	Rad54l	1104.6	728.809	1480.39	2.03125	1.02237	7.00096e-14	5.58851e-12
ENSMUSG00000093726	Gm20667	232.283	153.348	311.218	2.02949	1.02112	5.22889e-08	1.60317e-06
ENSMUSG00000015085	Entpd2	280.541	185.518	375.564	2.02441	1.0175	1.56668e-09	6.18674e-08
ENSMUSG00000033847	Pla2g4c	83.3536	55.148	111.559	2.02291	1.01643	0.000100837	0.00146733
ENSMUSG00000033453	Adamts15	1685.79	1115.43	2256.15	2.02266	1.01626	1.65859e-16	1.95111e-14
ENSMUSG00000030978	Rrm1	12064.5	7983.14	16145.8	2.02248	1.01613	1.63707e-17	2.30127e-15
ENSMUSG00000028339	Col15a1	22147.1	14659.2	29635	2.0216	1.0155	1.25439e-20	2.74871e-18
ENSMUSG00000025574	Tk1	4227.79	2798.83	5656.75	2.02111	1.01515	1.68076e-16	1.96684e-14
ENSMUSG00000022103	Gfra2	604.024	399.914	808.133	2.02077	1.01491	2.02025e-13	1.53587e-11
ENSMUSG00000085399	9130206I24Rik	214.119	141.768	286.47	2.0207	1.01485	9.43563e-09	3.21978e-07
ENSMUSG00000026429	Ube2t	1064.04	704.562	1423.52	2.02043	1.01466	3.87647e-14	3.209e-12
ENSMUSG00000019214	Chtf18	834.443	553.352	1115.53	2.01596	1.01147	3.61427e-12	2.21322e-10
ENSMUSG00000090157	Gm16534	328.611	218.003	439.219	2.01474	1.01059	1.13881e-09	4.65329e-08
ENSMUSG00000038644	Pold1	3296.59	2187.16	4406.01	2.01449	1.01041	2.43722e-16	2.76519e-14
ENSMUSG00000027641	Rbl1	2825.59	1876.9	3774.27	2.0109	1.00784	2.76997e-16	3.11113e-14
ENSMUSG00000072980	Oip5	544.814	362.075	727.553	2.0094	1.00676	3.99521e-11	2.11104e-09
ENSMUSG00000062257	Opcml	82.8085	55.0565	110.56	2.00812	1.00585	1.91402e-05	0.000342516
ENSMUSG00000082292	Gm12250	83.0421	55.2136	110.871	2.00803	1.00578	0.0024128	0.0217541
ENSMUSG00000004099	Dnmt1	11093.7	7376.52	14810.8	2.00783	1.00564	1.74917e-17	2.42831e-15
ENSMUSG00000038403	Hfe2	5885.18	3914.81	7855.56	2.00663	1.00477	4.13541e-18	6.37452e-16
ENSMUSG00000091449	Gm10269	80.2757	53.4808	107.071	2.00204	1.00147	0.00105586	0.0109557
ENSMUSG00000042828	Trim72	4198.64	2797.37	5599.91	2.00185	1.00133	4.94941e-17	6.43164e-15
ENSMUSG00000038010	Ccdc138	344.74	229.718	459.761	2.00141	1.00102	8.12735e-10	3.39541e-08
ENSMUSG00000050107	Gsg2	624.94	416.47	833.41	2.00113	1.00081	5.11503e-11	2.64643e-09
ENSMUSG00000022210	Dhrs4	4703.18	3135.71	6270.66	1.99976	0.999826	6.28986e-19	1.11575e-16
ENSMUSG00000030030	1700003E16Rik	40.5868	27.0824	54.0913	1.99728	0.998039	0.00567888	0.0431583
ENSMUSG00000022021	Diap3	1848.09	1233.27	2462.92	1.99707	0.997886	2.94711e-16	3.29354e-14
ENSMUSG00000028125	Abca4	2664.44	1778.79	3550.09	1.99579	0.996959	4.31988e-17	5.67963e-15
ENSMUSG00000009210	2310007L24Rik	148.942	99.4617	198.422	1.99496	0.99636	5.57388e-06	0.000113153
ENSMUSG00000025537	Phkg1	215.165	143.837	286.492	1.99178	0.994059	1.06277e-08	3.59907e-07
ENSMUSG00000023034	Nr4a1	3929.87	2628.22	5231.52	1.99052	0.993144	6.28005e-21	1.41783e-18
ENSMUSG00000022881	Rfc4	1653.62	1106.33	2200.9	1.98937	0.992312	1.30883e-14	1.16086e-12
ENSMUSG00000026873	Phf19	560.351	374.923	745.778	1.98915	0.992152	1.94219e-11	1.06137e-09
ENSMUSG00000027811	4930579G24Rik	986.191	659.913	1312.47	1.98885	0.991935	9.13899e-13	6.22761e-11
ENSMUSG00000041559	Fmod	1273.57	852.261	1694.88	1.98869	0.991819	8.12641e-25	3.07853e-22
ENSMUSG00000023886	Smoc2	2878.3	1927.6	3829	1.9864	0.990158	8.97084e-18	1.302e-15
ENSMUSG00000042115	Klhdc8a	341.93	229.045	454.814	1.9857	0.989646	2.42183e-09	9.28479e-08
ENSMUSG00000064225	Paqr9	2180.92	1461.71	2900.13	1.98407	0.98846	2.15443e-15	2.1789e-13
ENSMUSG00000032942	Ucp3	3372.74	2262.27	4483.21	1.98173	0.986762	2.30612e-18	3.81809e-16
ENSMUSG00000025789	St8sia2	231.932	155.59	308.274	1.98133	0.986467	4.74383e-08	1.47059e-06
ENSMUSG00000046591	5730590G19Rik	1009.6	677.359	1341.84	1.98098	0.986216	1.15688e-12	7.78837e-11
ENSMUSG00000007805	Twist2	87.2807	58.6069	115.955	1.97851	0.984416	9.78035e-05	0.00142504
ENSMUSG00000032925	Itgbl1	198.412	133.233	263.592	1.97843	0.984357	7.50478e-09	2.62503e-07
ENSMUSG00000033036	Gm7879	65.3404	43.8833	86.7975	1.97792	0.983981	0.00454461	0.0361612
ENSMUSG00000019982	Myb	56.552	38.0089	75.0951	1.97573	0.982383	0.00138917	0.0138058
ENSMUSG00000084989	E030010N08Rik	285.941	192.327	379.556	1.97349	0.980747	1.99197e-08	6.51868e-07
ENSMUSG00000019845	Tube1	397.198	267.505	526.891	1.96965	0.977938	1.9446e-09	7.59856e-08
ENSMUSG00000022129	Dct	282.218	190.072	374.363	1.96959	0.977893	1.30278e-14	1.1601e-12
ENSMUSG00000037625	Cldn11	106.792	71.9982	141.587	1.96653	0.975652	4.63797e-06	9.63413e-05
ENSMUSG00000026683	Nuf2	2939.71	1984.08	3895.34	1.96329	0.973276	1.19743e-16	1.4625e-14
ENSMUSG00000021811	Dnajc9	3029.47	2045.53	4013.4	1.96203	0.972348	2.44552e-15	2.46216e-13
ENSMUSG00000028780	Sema3c	1886.98	1274.27	2499.69	1.96167	0.97208	4.11675e-18	6.37452e-16
ENSMUSG00000026274	Pask	1184.51	800.591	1568.42	1.95908	0.970177	4.41609e-13	3.19578e-11
ENSMUSG00000067608	Pcna-ps2	1124.96	760.523	1489.4	1.95839	0.969671	4.41813e-13	3.19578e-11
ENSMUSG00000037379	Spon2	3083.13	2086.92	4079.34	1.95472	0.966958	6.12038e-18	9.08634e-16
ENSMUSG00000007646	Rad51c	902.413	610.918	1193.91	1.95429	0.966643	9.09167e-12	5.17069e-10
ENSMUSG00000091747	D17H6S56E-5	7560.29	5118.57	10002	1.95406	0.966474	1.96778e-17	2.69827e-15
ENSMUSG00000062510	Nsl1	847.905	574.261	1121.55	1.95303	0.965716	3.51572e-14	2.94306e-12
ENSMUSG00000042834	D0H4S114	27448.2	18591.9	36304.5	1.95271	0.965475	1.46983e-20	3.15887e-18
ENSMUSG00000024053	Emilin2	18371.3	12445.3	24297.2	1.95231	0.965181	2.99149e-18	4.81028e-16
ENSMUSG00000033597	Caskin1	104.474	70.7786	138.169	1.95213	0.965047	0.000163586	0.00224727
ENSMUSG00000034330	Plcg2	2164.5	1466.7	2862.3	1.95152	0.964596	6.87902e-14	5.51086e-12
ENSMUSG00000041193	Pla2g5	302.42	205.016	399.824	1.95021	0.963629	4.2527e-09	1.57894e-07
ENSMUSG00000024987	Cyp26a1	64.6696	43.8561	85.4832	1.94917	0.962863	1.30333e-07	3.7588e-06
ENSMUSG00000073434	Wdr90	2047.18	1388.37	2705.98	1.94903	0.96276	6.28571e-14	5.10879e-12
ENSMUSG00000018470	Kcnab3	243.146	165.105	321.187	1.94535	0.960026	1.54113e-06	3.5438e-05
ENSMUSG00000071073	Gm88	39.6885	26.953	52.4241	1.94502	0.959786	0.00605348	0.045221
ENSMUSG00000033066	Gas7	2080.68	1414.53	2746.83	1.94186	0.95744	4.85021e-15	4.61307e-13
ENSMUSG00000065952	C330021F23Rik	91.9515	62.5156	121.387	1.94171	0.957331	2.08807e-05	0.00036952
ENSMUSG00000006678	Pola1	1908.28	1297.96	2518.61	1.94043	0.956378	8.90219e-15	8.15462e-13
ENSMUSG00000033762	Recql4	461.588	314.173	609.003	1.93843	0.954889	4.58684e-09	1.68619e-07
ENSMUSG00000020723	Cacng4	69.0844	47.0234	91.1454	1.9383	0.954791	0.000707289	0.00786763
ENSMUSG00000028444	Cntfr	133.388	90.7978	175.979	1.93814	0.95467	6.442e-06	0.000128903
ENSMUSG00000079067	Hmgn2-ps1	71.7279	48.8761	94.5797	1.93509	0.952401	0.00077667	0.00848039
ENSMUSG00000031756	Cenpn	1295.83	883.377	1708.29	1.93382	0.951452	8.14813e-13	5.60366e-11
ENSMUSG00000024007	Ppil1	3686.28	2513.56	4859	1.93312	0.950928	2.78895e-15	2.77048e-13
ENSMUSG00000026134	Prim2	780.378	532.612	1028.14	1.93038	0.948887	2.04488e-11	1.10937e-09
ENSMUSG00000028873	Cdca8	3335.19	2278.85	4391.53	1.92708	0.946418	2.68597e-15	2.69212e-13
ENSMUSG00000083246	Gm11839	82.3066	56.2519	108.361	1.92636	0.945877	4.69557e-05	0.000757221
ENSMUSG00000059791	Nrm	1562.76	1068.1	2057.42	1.92625	0.945791	4.23728e-13	3.08493e-11
ENSMUSG00000005233	Spc25	3055.24	2091.06	4019.41	1.92219	0.942748	4.35776e-16	4.79805e-14
ENSMUSG00000031262	Cenpi	1566.73	1072.54	2060.93	1.92154	0.942265	2.2847e-13	1.72518e-11
ENSMUSG00000039814	Xkr5	581.529	398.146	764.912	1.92119	0.941997	8.20707e-09	2.83957e-07
ENSMUSG00000034648	Lrrn1	67.6322	46.3169	88.9475	1.92041	0.941414	0.000733369	0.00809234
ENSMUSG00000050875	A730017C20Rik	79.8095	54.6651	104.954	1.91994	0.941064	0.000385065	0.00466988
ENSMUSG00000037572	Wdhd1	1933.36	1324.64	2542.08	1.91907	0.940405	4.75219e-13	3.41531e-11
ENSMUSG00000034686	Prr7	57.9236	39.7114	76.1359	1.91723	0.939023	0.00408267	0.0332066
ENSMUSG00000057897	Camk2b	609.344	417.817	800.872	1.9168	0.9387	1.24359e-11	6.96631e-10
ENSMUSG00000024471	Myot	187.259	128.482	246.036	1.91495	0.937307	3.61445e-06	7.70129e-05
ENSMUSG00000020914	Top2a	17002.5	11666.5	22338.5	1.91476	0.937163	6.46752e-17	8.26031e-15
ENSMUSG00000034906	Ncaph	3395.83	2332.19	4459.47	1.91214	0.935186	7.11766e-15	6.65635e-13
ENSMUSG00000017146	Brca1	1289.58	885.911	1693.26	1.91132	0.93457	3.44132e-12	2.13066e-10
ENSMUSG00000002055	Spag5	3661.94	2516.83	4807.05	1.90996	0.933543	4.97129e-15	4.70819e-13
ENSMUSG00000037206	Islr	1552.86	1067.36	2038.37	1.90974	0.933375	2.34964e-16	2.68983e-14
ENSMUSG00000044067	Gpr22	3302.95	2270.73	4335.18	1.90915	0.932934	7.7374e-15	7.17588e-13
ENSMUSG00000022673	Mcm4	5308	3650.43	6965.56	1.90814	0.932171	2.70876e-15	2.70284e-13
ENSMUSG00000026825	Dnm1	1238.09	852.087	1624.09	1.90602	0.930561	1.11854e-15	1.1905e-13
ENSMUSG00000039396	Neil3	1695.5	1167.08	2223.92	1.90555	0.930206	1.02366e-13	8.05627e-12
ENSMUSG00000014786	Slc9a5	1121.4	772.106	1470.7	1.90479	0.929633	4.44586e-12	2.62882e-10
ENSMUSG00000033249	Hsf4	76.1565	52.4398	99.8732	1.90453	0.929436	0.00120612	0.012237
ENSMUSG00000031519	Asb5	408.969	282.077	535.86	1.89969	0.925765	1.41119e-09	5.61237e-08
ENSMUSG00000022360	Atad2	4187.23	2889.73	5484.73	1.898	0.924483	8.71013e-15	8.01153e-13
ENSMUSG00000095562		580.788	401.135	760.44	1.89572	0.922746	3.78992e-07	9.87722e-06
ENSMUSG00000085643	Gm12519	102.806	71.082	134.529	1.89259	0.920365	3.1057e-05	0.000519966
ENSMUSG00000070509	Rgma	2168.02	1500.66	2835.38	1.88942	0.917946	1.64119e-12	1.07258e-10
ENSMUSG00000031070	Mrgprf	229.053	158.646	299.461	1.88761	0.916558	9.50257e-08	2.80942e-06
ENSMUSG00000045751	Mms22l	1213.75	840.854	1586.65	1.88695	0.916058	1.54235e-12	1.01094e-10
ENSMUSG00000024056	Ndc80	1811.8	1255.67	2367.94	1.8858	0.91518	7.94758e-14	6.29916e-12
ENSMUSG00000027203	Dut	3110.13	2157.3	4062.95	1.88335	0.913302	3.2091e-14	2.69649e-12
ENSMUSG00000049932	H2afx	2857.7	1984.73	3730.67	1.87969	0.910492	1.68718e-12	1.09623e-10
ENSMUSG00000030677	Kif22	2917.09	2026.59	3807.58	1.87881	0.909822	2.31127e-14	1.97928e-12
ENSMUSG00000018819	Lsp1	4161.46	2893.32	5429.6	1.8766	0.908122	3.50346e-15	3.43446e-13
ENSMUSG00000078965	Gm12033	230.031	159.941	300.121	1.87645	0.908009	0.000134234	0.0019001
ENSMUSG00000038738	Shank1	379.487	263.979	494.995	1.87513	0.906992	1.21897e-08	4.09088e-07
ENSMUSG00000028600	Podn	250.121	174.02	326.223	1.87463	0.906608	3.80863e-07	9.90997e-06
ENSMUSG00000042029	Ncapg2	3023.37	2105.67	3941.07	1.87165	0.904309	2.16692e-14	1.87e-12
ENSMUSG00000022235	Cmbl	928.211	646.934	1209.49	1.86957	0.902708	6.14619e-11	3.108e-09
ENSMUSG00000059323	Tonsl	1089.08	760.16	1417.99	1.86539	0.899475	1.42296e-10	6.73826e-09
ENSMUSG00000036882	Arhgap33	1667.35	1164.02	2170.68	1.86482	0.899034	2.24202e-12	1.40763e-10
ENSMUSG00000017716	Birc5	3675.46	2566.83	4784.09	1.86381	0.898255	1.09904e-14	9.94523e-13
ENSMUSG00000042606	Hirip3	2287.39	1597.61	2977.18	1.86352	0.898031	5.76522e-13	4.01428e-11
ENSMUSG00000078762	Haus5	369.994	258.583	481.405	1.8617	0.896622	3.82082e-07	9.93014e-06
ENSMUSG00000021213	Akr1c13	58.0632	40.5956	75.5308	1.86057	0.895742	0.00151638	0.0149044
ENSMUSG00000087204	1700073E17Rik	43.5161	30.4433	56.5889	1.85883	0.894393	0.00322669	0.0275266
ENSMUSG00000058152	Chsy3	77.4799	54.2279	100.732	1.85757	0.893415	0.000345362	0.00425769
ENSMUSG00000088609		232.524	162.828	302.22	1.85607	0.892251	4.88332e-06	0.000100875
ENSMUSG00000029126	Nsg1	800.469	560.633	1040.31	1.85559	0.891879	9.18228e-11	4.51062e-09
ENSMUSG00000095681	Gm8281	68.8092	48.2279	89.3904	1.8535	0.890253	0.00020332	0.00270662
ENSMUSG00000038239	Hrc	18749.2	13144.4	24354	1.8528	0.889709	1.23054e-15	1.28522e-13
ENSMUSG00000053475	Tnfaip6	162.951	114.264	211.639	1.8522	0.889239	1.91665e-06	4.3228e-05
ENSMUSG00000031445	Proz	64.048	44.9154	83.1806	1.85194	0.889036	0.00330964	0.0281055
ENSMUSG00000059674	Cdh24	524.811	368.386	681.236	1.84924	0.886935	1.6379e-08	5.39155e-07
ENSMUSG00000024672	Ms4a7	191.56	134.57	248.549	1.84699	0.885179	1.58387e-06	3.62716e-05
ENSMUSG00000037624	Kcnk2	476.942	335.179	618.705	1.8459	0.884321	6.85393e-10	2.92352e-08
ENSMUSG00000027377	Mall	1288.56	905.991	1671.13	1.84454	0.883258	3.94786e-13	2.89307e-11
ENSMUSG00000052981	Ube2ql1	117.607	82.7346	152.479	1.84299	0.882045	0.000175688	0.00239002
ENSMUSG00000047658	Gal3st3	652.623	459.322	845.923	1.84168	0.88102	8.60699e-10	3.5824e-08
ENSMUSG00000044005	Gls2	65.6065	46.1754	85.0377	1.84162	0.880979	0.00335125	0.0283834
ENSMUSG00000092335	Gm7221	94.064	66.2404	121.888	1.84008	0.879768	0.000556673	0.0064102
ENSMUSG00000025407	Gli1	399.853	281.608	518.098	1.83979	0.879539	2.83265e-08	9.05759e-07
ENSMUSG00000026726	Cubn	817.388	576.03	1058.75	1.83801	0.878141	4.58628e-11	2.39505e-09
ENSMUSG00000047757	Fancb	400.673	282.864	518.482	1.83297	0.874185	7.81325e-08	2.32535e-06
ENSMUSG00000054115	Skp2	1043.35	736.761	1349.93	1.83225	0.873618	7.97361e-12	4.5697e-10
ENSMUSG00000051378	Kif18b	1703.17	1202.92	2203.43	1.83174	0.873214	1.866e-12	1.19848e-10
ENSMUSG00000047197	Gjd3	71.014	50.1856	91.8423	1.83005	0.871886	0.0058323	0.0439507
ENSMUSG00000037347	Chst7	527.793	373.085	682.502	1.82935	0.871329	5.66568e-10	2.44939e-08
ENSMUSG00000026708	Cenpl	955.152	675.655	1234.65	1.82734	0.869743	3.14266e-10	1.39645e-08
ENSMUSG00000086596	Susd5	47.0607	33.2929	60.8285	1.82707	0.869531	0.00511025	0.0397423
ENSMUSG00000029363	Rfc5	1959.09	1386.58	2531.59	1.82578	0.868515	4.10942e-12	2.46246e-10
ENSMUSG00000030793	Pycard	1266.3	896.346	1636.26	1.82547	0.868272	4.11783e-11	2.1707e-09
ENSMUSG00000032338	Hcn4	697.044	493.492	900.596	1.82495	0.867854	2.59512e-10	1.17416e-08
ENSMUSG00000028017	Egf	476.649	337.634	615.665	1.82347	0.866684	2.26405e-08	7.34429e-07
ENSMUSG00000069793	Slfn9	2404.94	1703.85	3106.03	1.82295	0.866273	8.99978e-13	6.1515e-11
ENSMUSG00000032400	Zwilch	1859.13	1317.3	2400.96	1.82264	0.86603	4.07025e-12	2.45213e-10
ENSMUSG00000036446	Lum	7038.53	4987.32	9089.75	1.82257	0.865975	6.13859e-18	9.08634e-16
ENSMUSG00000023505	Cdca3	4064.33	2880.49	5248.17	1.82197	0.865498	3.32873e-13	2.48002e-11
ENSMUSG00000081209	Gm14890	58.7723	41.666	75.8786	1.82112	0.864823	0.00375319	0.031104
ENSMUSG00000027338	Prnd	2553.98	1811.08	3296.87	1.82039	0.864244	8.54585e-16	9.18309e-14
ENSMUSG00000035686	Thrsp	195.205	138.512	251.898	1.81861	0.862832	6.3846e-05	0.000994441
ENSMUSG00000016995	Matn4	156.026	110.784	201.268	1.81676	0.861369	1.24132e-08	4.1472e-07
ENSMUSG00000038943	Prc1	9234.08	6556.55	11911.6	1.81675	0.86136	9.8713e-15	8.96884e-13
ENSMUSG00000075224	Lrrc55	234.905	166.871	302.94	1.81542	0.860301	1.44746e-06	3.33873e-05
ENSMUSG00000024660	Incenp	4164.13	2960.2	5368.05	1.81341	0.858704	1.22107e-12	8.19583e-11
ENSMUSG00000029591	Ung	2170.08	1543.07	2797.09	1.81268	0.858121	6.13647e-11	3.108e-09
ENSMUSG00000020808	Fam64a	1983.85	1410.69	2557.01	1.81259	0.858051	4.09681e-12	2.4615e-10
ENSMUSG00000028718	Stil	1651.67	1174.53	2128.8	1.81247	0.857955	6.66446e-12	3.8791e-10
ENSMUSG00000043811	Rtn4r	214.223	152.481	275.966	1.80984	0.855864	1.7444e-05	0.000314729
ENSMUSG00000026109	Tmeff2	52.7282	37.5359	67.9206	1.80948	0.855579	0.00480347	0.037817
ENSMUSG00000020493	Prr11	1615.23	1151.08	2079.38	1.80647	0.853172	2.05179e-12	1.30699e-10
ENSMUSG00000035849	Krt222	971.087	692.334	1249.84	1.80526	0.852204	1.71065e-11	9.3943e-10
ENSMUSG00000025747	Tyms	1867.28	1331.57	2403	1.80464	0.851708	1.43204e-12	9.44172e-11
ENSMUSG00000033544	Angptl1	160.551	114.501	206.601	1.80436	0.851483	2.17635e-06	4.82576e-05
ENSMUSG00000069910	Ccdc99	894.877	638.258	1151.5	1.80412	0.851297	1.23811e-10	5.96403e-09
ENSMUSG00000032586	Traip	504.688	360.108	649.269	1.80298	0.850386	1.60682e-07	4.54116e-06
ENSMUSG00000027306	Nusap1	3526.69	2518.85	4534.54	1.80024	0.848192	1.56711e-13	1.20366e-11
ENSMUSG00000043419	A030009H04Rik	278.489	198.959	358.019	1.79946	0.847566	4.31081e-06	9.03105e-05
ENSMUSG00000002324	Rec8	259.788	185.638	333.939	1.79887	0.847091	5.25246e-07	1.32953e-05
ENSMUSG00000038379	Ttk	1260.27	901.222	1619.31	1.79679	0.845423	8.12826e-12	4.63456e-10
ENSMUSG00000095865	Gm13237	382.271	273.402	491.14	1.7964	0.845108	5.30238e-08	1.62347e-06
ENSMUSG00000019303	Psmc3ip	557.339	398.761	715.917	1.79535	0.844267	4.98791e-08	1.53984e-06
ENSMUSG00000025912	Mybl1	918.519	658.567	1178.47	1.78945	0.839514	2.31517e-10	1.05605e-08
ENSMUSG00000022546	Gpt	1010.6	724.638	1296.57	1.78926	0.839364	1.88402e-10	8.71836e-09
ENSMUSG00000021228	Acot3	215.087	154.227	275.946	1.78922	0.839327	3.92419e-05	0.000646826
ENSMUSG00000018500	Adora2b	47.4166	34.0074	60.8258	1.7886	0.838833	0.0062563	0.0463796
ENSMUSG00000074661	Pde4d	1664.74	1194.23	2135.26	1.78798	0.838331	2.62743e-12	1.63581e-10
ENSMUSG00000063445	Nmral1	795.847	571.003	1020.69	1.78754	0.837978	5.70281e-09	2.06586e-07
ENSMUSG00000029510	Gpc2	693.746	497.898	889.594	1.7867	0.837296	6.1985e-09	2.21668e-07
ENSMUSG00000038732	Mboat1	182.035	130.695	233.376	1.78565	0.836453	2.03547e-05	0.000361357
ENSMUSG00000030513	Pcsk6	3430.37	2463.59	4397.15	1.78486	0.835809	6.08642e-14	4.96488e-12
ENSMUSG00000024165	Hn1l	3410.12	2449.92	4370.32	1.78387	0.835008	8.94433e-13	6.13235e-11
ENSMUSG00000040147	Maob	935.057	671.825	1198.29	1.78363	0.83482	7.53597e-12	4.35236e-10
ENSMUSG00000023473	Celsr3	63.9296	45.966	81.8932	1.7816	0.833175	0.00312303	0.026806
ENSMUSG00000005873	Reep5	23561.4	16958.2	30164.6	1.77876	0.830873	1.36236e-14	1.19882e-12
ENSMUSG00000032344	E330016A19Rik	404.251	290.958	517.543	1.77875	0.830864	3.09835e-08	9.86484e-07
ENSMUSG00000008318	Relt	393.942	283.545	504.338	1.77868	0.830811	3.9386e-06	8.34424e-05
ENSMUSG00000021697	Depdc1b	372.245	267.979	476.512	1.77817	0.830394	2.06942e-07	5.65449e-06
ENSMUSG00000034329	Brip1	712.102	512.831	911.373	1.77714	0.82956	3.15792e-09	1.18826e-07
ENSMUSG00000025507	Lrdd	1004.06	723.262	1284.86	1.77648	0.829025	1.22285e-08	4.09159e-07
ENSMUSG00000043460	Elfn2	87.5897	63.095	112.084	1.77644	0.828985	0.00383204	0.0316519
ENSMUSG00000021747	4930452B06Rik	1411.35	1017.55	1805.16	1.77404	0.827035	1.44238e-10	6.81577e-09
ENSMUSG00000014846	Tppp3	1227.21	884.961	1569.45	1.77347	0.826577	1.08746e-09	4.45161e-08
ENSMUSG00000034023	Fancd2	1199.84	866.565	1533.11	1.76918	0.823078	2.80744e-10	1.26256e-08
ENSMUSG00000028068	Iqgap3	6350.98	4587.29	8114.67	1.76895	0.822892	3.81556e-12	2.31743e-10
ENSMUSG00000015396	Cd83	209.646	151.502	267.79	1.76757	0.821767	1.08805e-05	0.000205745
ENSMUSG00000042246	Tmc7	1295.03	935.973	1654.08	1.76723	0.821494	4.66957e-12	2.75382e-10
ENSMUSG00000043099	Hic1	2370.01	1713.46	3026.56	1.76635	0.820769	4.48666e-11	2.35402e-09
ENSMUSG00000035258	Abi3bp	922.467	667.083	1177.85	1.76567	0.820217	2.05388e-19	3.92361e-17
ENSMUSG00000047793	Sned1	4107.81	2971.02	5244.6	1.76525	0.819874	9.54937e-14	7.54198e-12
ENSMUSG00000036768	Kif15	1900.45	1375.48	2425.43	1.76334	0.818312	1.26387e-11	7.06219e-10
ENSMUSG00000027715	Ccna2	9586.43	6939.33	12233.5	1.76293	0.817971	5.25183e-13	3.70296e-11
ENSMUSG00000032397	Tipin	1967.03	1423.99	2510.07	1.7627	0.817783	2.40167e-11	1.29348e-09
ENSMUSG00000055026	Gabrg3	43.7139	31.6505	55.7773	1.76229	0.817452	0.00353714	0.0296322
ENSMUSG00000029730	Mcm7	6716.51	4863.77	8569.26	1.76185	0.817095	2.57008e-11	1.37755e-09
ENSMUSG00000027379	Bub1	2965.61	2151.37	3779.85	1.75695	0.813075	3.94697e-12	2.38429e-10
ENSMUSG00000043795	Gm14492	683.578	496.069	871.086	1.75598	0.812275	6.83579e-10	2.92135e-08
ENSMUSG00000034311	Kif4	3765.74	2733.17	4798.31	1.75558	0.811951	1.59289e-11	8.81252e-10
ENSMUSG00000032523	Hhatl	4745.55	3445.91	6045.19	1.75431	0.810901	1.00179e-12	6.78518e-11
ENSMUSG00000031669	Gins3	686.294	498.463	874.124	1.75364	0.810353	5.8487e-09	2.11186e-07
ENSMUSG00000039187	Fanci	887.536	645.045	1130.03	1.75186	0.808887	4.55688e-09	1.68071e-07
ENSMUSG00000072082	Ccnf	1644.34	1195.66	2093.01	1.7505	0.807767	4.84697e-11	2.52528e-09
ENSMUSG00000006930	Hap1	309.211	224.848	393.575	1.75041	0.807692	1.59478e-06	3.64841e-05
ENSMUSG00000021176	2610021K21Rik	296.04	215.296	376.785	1.75008	0.807418	7.23312e-06	0.000143195
ENSMUSG00000085583	Gm15676	96.2394	69.9951	122.484	1.74989	0.807263	0.00171153	0.0164182
ENSMUSG00000037922	Bank1	51.8797	37.7466	66.0127	1.74884	0.806399	0.00393306	0.0322479
ENSMUSG00000025089	Gfra1	174.011	126.614	221.407	1.74868	0.806264	4.55254e-06	9.48312e-05
ENSMUSG00000033595	Lgi3	691.617	503.455	879.779	1.74748	0.805278	3.63892e-07	9.52384e-06
ENSMUSG00000032243	Itga11	70.1328	51.0726	89.193	1.7464	0.804381	0.000385689	0.00467491
ENSMUSG00000054320	Lrrc36	94.898	69.108	120.688	1.74637	0.804357	0.00468411	0.0369815
ENSMUSG00000054978	Kbtbd13	124.263	90.5075	158.018	1.74592	0.803983	8.46017e-05	0.00126062
ENSMUSG00000020439	Smtn	20924.7	15245	26604.3	1.74512	0.803323	1.023e-12	6.9079e-11
ENSMUSG00000022371	Col14a1	10847.9	7905.66	13790.1	1.74434	0.802679	3.828e-14	3.19236e-12
ENSMUSG00000040380	Cbln3	103.174	75.2027	131.146	1.7439	0.802315	0.00190574	0.0179499
ENSMUSG00000047821	Trim16	775.438	566.016	984.861	1.73999	0.799077	1.81566e-09	7.10715e-08
ENSMUSG00000014776	Nol3	1285.49	939.203	1631.78	1.73741	0.796935	1.02588e-08	3.49001e-07
ENSMUSG00000074001	Kbtbd5	1461.46	1067.83	1855.09	1.73725	0.796806	6.14603e-11	3.108e-09
ENSMUSG00000038807	Rap1gap2	5672.28	4145.19	7199.37	1.7368	0.796433	5.69624e-13	3.97864e-11
ENSMUSG00000094627		197.813	144.564	251.063	1.73669	0.796344	6.48489e-06	0.000129646
ENSMUSG00000021965	F630043A04Rik	1061.91	776.416	1347.41	1.73542	0.795282	8.73078e-10	3.62717e-08
ENSMUSG00000028884	Rpa2	2525.97	1847.06	3204.87	1.73512	0.795035	1.85563e-10	8.6048e-09
ENSMUSG00000046733	Gprc5a	235.738	172.461	299.015	1.73381	0.793949	8.12527e-05	0.00121721
ENSMUSG00000023015	Racgap1	7888.45	5773.81	10003.1	1.7325	0.792853	3.51085e-12	2.1558e-10
ENSMUSG00000006958	Chrd	105.931	77.5713	134.291	1.73119	0.791767	0.000459635	0.00540985
ENSMUSG00000029685	Asb15	1205.94	883.404	1528.48	1.73022	0.790956	5.09755e-11	2.64351e-09
ENSMUSG00000022215	Fitm1	4915.82	3604.49	6227.15	1.72761	0.788777	9.74423e-12	5.51375e-10
ENSMUSG00000075020	E530001K10Rik	90.3371	66.2484	114.426	1.72722	0.788456	0.00262815	0.0233752
ENSMUSG00000034040	Wbscr17	690.424	506.348	874.5	1.72707	0.78833	5.29555e-09	1.9277e-07
ENSMUSG00000035699	Osta	233.876	171.629	296.123	1.72537	0.786904	4.95718e-06	0.000102024
ENSMUSG00000015880	Ncapg	2172.74	1594.6	2750.87	1.72512	0.7867	6.48408e-11	3.24946e-09
ENSMUSG00000006369	Fbln1	4279.06	3142.27	5415.86	1.72355	0.785385	1.84995e-12	1.19159e-10
ENSMUSG00000042190	Cmklr1	813.596	597.662	1029.53	1.72259	0.784583	1.78987e-09	7.01847e-08
ENSMUSG00000040860	Crocc	1855.42	1363.3	2347.54	1.72196	0.784053	1.491e-09	5.91925e-08
ENSMUSG00000019992	Fam54a	499.48	367.101	631.86	1.72122	0.783429	3.20277e-07	8.44164e-06
ENSMUSG00000087413	Gm11266	889.174	653.56	1124.79	1.72102	0.78326	2.56985e-10	1.16508e-08
ENSMUSG00000019929	Dcn	23416.3	17218	29614.5	1.71997	0.782381	1.18539e-15	1.25327e-13
ENSMUSG00000040037	Negr1	152.904	112.499	193.308	1.7183	0.780985	1.47053e-05	0.000269628
ENSMUSG00000013236	Ptprs	13531.1	9969.38	17092.9	1.71454	0.777822	1.2987e-12	8.63903e-11
ENSMUSG00000042804	Gpr153	3417.26	2518.53	4315.98	1.71369	0.777104	2.22222e-12	1.40175e-10
ENSMUSG00000029093	Sorcs2	3520.04	2594.74	4445.34	1.71321	0.776701	4.38353e-12	2.60575e-10
ENSMUSG00000062591	Tubb4a	638.984	471.115	806.853	1.71264	0.776225	6.09937e-08	1.85732e-06
ENSMUSG00000001403	Ube2c	4224.17	3114.86	5333.49	1.71227	0.775913	1.08557e-10	5.26326e-09
ENSMUSG00000043719	Col6a6	3333.05	2457.96	4208.15	1.71205	0.775724	1.54259e-13	1.18891e-11
ENSMUSG00000060214	Gm8203	8281.73	6109.56	10453.9	1.71108	0.774903	7.18081e-12	4.15799e-10
ENSMUSG00000051517	E130306D19Rik	1097.93	810.1	1385.76	1.71061	0.77451	5.74227e-09	2.07679e-07
ENSMUSG00000037224	Zfyve28	98.7431	72.8701	124.616	1.71011	0.774091	0.00182239	0.0172961
ENSMUSG00000040690	Col16a1	3400.25	2509.45	4291.05	1.70996	0.773963	5.1456e-13	3.65109e-11
ENSMUSG00000041577	Prelp	2650.77	1956.59	3344.94	1.70957	0.773636	2.0525e-12	1.30699e-10
ENSMUSG00000013155	E130303B06Rik	405.859	299.715	512.002	1.7083	0.772559	2.59789e-06	5.67045e-05
ENSMUSG00000095105	Edaradd	35.4473	26.188	44.7065	1.70714	0.771578	0.0038541	0.0317561
ENSMUSG00000067081	Asb18	301.219	222.653	379.786	1.70573	0.770388	5.2232e-06	0.000106518
ENSMUSG00000028445	Enho	204.271	150.999	257.543	1.70559	0.770275	0.000100796	0.00146733
ENSMUSG00000012819	Cdh23	119.73	88.5446	150.916	1.70441	0.769273	0.000563262	0.00647273
ENSMUSG00000036144	Meox2	2367.67	1751.6	2983.74	1.70343	0.768447	3.12439e-11	1.6627e-09
ENSMUSG00000016262	Sertad4	1437.54	1063.5	1811.58	1.70341	0.768426	2.12557e-12	1.34968e-10
ENSMUSG00000004730	Emr1	613.999	454.412	773.586	1.70239	0.767561	4.79789e-08	1.48323e-06
ENSMUSG00000014782	Plekhg4	75.6059	55.9792	95.2326	1.70121	0.766565	0.00430165	0.0346223
ENSMUSG00000077928	Mir208b	1277.46	946.71	1608.21	1.69874	0.764464	2.12508e-09	8.21758e-08
ENSMUSG00000023000	Dhh	164.224	121.738	206.709	1.69798	0.763821	0.000191013	0.00256621
ENSMUSG00000086392	A330050B17Rik	281.137	208.456	353.819	1.69733	0.763271	1.23407e-06	2.88521e-05
ENSMUSG00000062075	Lmnb2	2646.7	1962.54	3330.87	1.69722	0.763176	1.28708e-09	5.1927e-08
ENSMUSG00000026574	Dpt	9026.49	6696.01	11357	1.69608	0.762206	3.63037e-13	2.67796e-11
ENSMUSG00000072066	6720489N17Rik	106.317	78.8831	133.751	1.69556	0.761766	0.00170374	0.0163575
ENSMUSG00000073854	AI427809	97.977	72.717	123.237	1.69475	0.761069	0.00294552	0.0256868
ENSMUSG00000079553	Kifc1	3064.23	2275.36	3853.11	1.69341	0.759931	5.71437e-10	2.46289e-08
ENSMUSG00000068196	Col8a1	557.838	414.227	701.448	1.69339	0.759915	1.32933e-09	5.34387e-08
ENSMUSG00000091900	Gm4353	432.316	321.094	543.538	1.69277	0.759385	5.37747e-07	1.35657e-05
ENSMUSG00000071984	Fndc1	7655.48	5687.01	9623.94	1.69227	0.758959	1.32003e-12	8.75487e-11
ENSMUSG00000021263	Degs2	493.222	366.503	619.941	1.6915	0.758306	3.89688e-07	1.01043e-05
ENSMUSG00000003824	Syce2	303.731	225.701	381.762	1.69145	0.758261	9.23933e-06	0.000177565
ENSMUSG00000043629	1700019D03Rik	80.457	59.7989	101.115	1.69092	0.757807	0.00434036	0.0348461
ENSMUSG00000037020	Wdr62	1362.42	1013.33	1711.5	1.68898	0.756149	2.08184e-08	6.78296e-07
ENSMUSG00000040312	Cchcr1	1629.17	1212.31	2046.04	1.68772	0.755076	7.53569e-10	3.18865e-08
ENSMUSG00000005667	Mthfd2	908.015	675.924	1140.11	1.68674	0.754236	2.47588e-07	6.67532e-06
ENSMUSG00000044201	Cdc25c	913.697	680.233	1147.16	1.68642	0.753965	4.42221e-09	1.63373e-07
ENSMUSG00000048922	Cdca2	1982.49	1476.3	2488.68	1.68576	0.753397	4.73537e-10	2.06316e-08
ENSMUSG00000019942	Cdk1	5335.6	3973.62	6697.58	1.68551	0.753185	6.2854e-11	3.15696e-09
ENSMUSG00000000751	Rpa1	9327.86	6947.84	11707.9	1.68511	0.752843	2.8533e-10	1.2806e-08
ENSMUSG00000041406	BC055324	779.476	580.696	978.256	1.68463	0.752428	3.05588e-08	9.74349e-07
ENSMUSG00000030214	Plbd1	1095.44	816.314	1374.56	1.68386	0.751776	3.78914e-09	1.41624e-07
ENSMUSG00000041482	Fam38b	1114.77	830.743	1398.8	1.68379	0.751715	5.61608e-10	2.43265e-08
ENSMUSG00000017740	Slc12a5	134.514	100.306	168.723	1.68209	0.750255	0.00107408	0.0110886
ENSMUSG00000029659	6330406I15Rik	543.149	405.123	681.175	1.6814	0.749667	2.05188e-08	6.70489e-07
ENSMUSG00000043036	Ccdc63	280.272	209.221	351.324	1.67921	0.74778	3.00549e-05	0.000506605
ENSMUSG00000040998	Npnt	312.976	233.703	392.249	1.6784	0.74709	1.61558e-06	3.69221e-05
ENSMUSG00000044461	Shisa2	180.751	134.975	226.527	1.67828	0.746986	3.55842e-06	7.59639e-05
ENSMUSG00000027570	Col9a3	108.791	81.2411	136.341	1.67822	0.746934	2.07442e-06	4.6319e-05
ENSMUSG00000028626	Col9a2	472.543	352.977	592.109	1.67747	0.746289	1.89269e-07	5.20978e-06
ENSMUSG00000029910	Mad2l1	3092.77	2310.35	3875.19	1.67732	0.746157	1.0074e-10	4.90555e-09
ENSMUSG00000002797	Ggct	213.748	159.677	267.818	1.67725	0.746099	9.23441e-05	0.00135521
ENSMUSG00000017692	Rhbdl3	161.778	120.888	202.668	1.6765	0.745454	7.85011e-05	0.00118393
ENSMUSG00000035842	Ddx11	1380.06	1031.55	1728.57	1.67569	0.744757	3.54139e-09	1.32808e-07
ENSMUSG00000055612	Cdca7	1522.25	1137.84	1906.66	1.67569	0.744753	5.78956e-11	2.96795e-09
ENSMUSG00000018554	Ybx2	3691.65	2761.4	4621.91	1.67376	0.743092	1.33247e-10	6.35013e-09
ENSMUSG00000039904	Gpr37	66.2211	49.5372	82.905	1.67359	0.742946	0.00287923	0.025217
ENSMUSG00000038764	Ptpn3	2402.07	1797.08	3007.06	1.6733	0.742694	2.7002e-10	1.21678e-08
ENSMUSG00000035198	Tubg1	3369.46	2521.55	4217.37	1.67253	0.742032	1.27504e-08	4.2535e-07
ENSMUSG00000021569	Trip13	1156.91	866.152	1447.66	1.67137	0.741031	3.45864e-08	1.09341e-06
ENSMUSG00000031629	Mlf1ip	376.839	282.151	471.527	1.67119	0.740872	5.12881e-05	0.000818724
ENSMUSG00000023940	Sgol1	1158.26	867.401	1449.12	1.67065	0.740407	6.47559e-09	2.30105e-07
ENSMUSG00000027496	Aurka	2411.81	1806.64	3016.98	1.66994	0.739798	2.9837e-10	1.33377e-08
ENSMUSG00000026979	Psd4	228.798	171.391	286.204	1.66989	0.73975	0.000127344	0.00180945
ENSMUSG00000026443	Lrrn2	908.584	680.731	1136.44	1.66944	0.73936	2.69666e-07	7.20969e-06
ENSMUSG00000058153	Sez6l	46.5542	34.8909	58.2174	1.66856	0.7386	0.00636098	0.0470309
ENSMUSG00000030359	Pzp	67.3446	50.4736	84.2157	1.66851	0.73856	0.00176505	0.016852
ENSMUSG00000029121	Crmp1	722.077	541.278	902.875	1.66804	0.738156	1.05786e-07	3.09886e-06
ENSMUSG00000048327	Ckap2l	5044.91	3781.95	6307.87	1.66789	0.738021	1.12614e-10	5.44812e-09
ENSMUSG00000050511	Oprd1	113.185	84.858	141.512	1.66764	0.737805	0.00103396	0.0107638
ENSMUSG00000031351	Zfp185	247.665	185.762	309.569	1.66648	0.736808	4.65639e-07	1.18807e-05
ENSMUSG00000051652	Lrrc3	180.036	135.196	224.875	1.66332	0.73407	0.000452974	0.0053427
ENSMUSG00000022574	Naprt1	845.368	635.312	1055.42	1.66127	0.732285	1.48399e-07	4.21918e-06
ENSMUSG00000046182	Gsg1l	2661.98	2001.73	3322.24	1.65969	0.730914	1.0595e-08	3.59346e-07
ENSMUSG00000036596	Cpz	211.051	158.756	263.346	1.65881	0.730147	6.43478e-05	0.00100156
ENSMUSG00000027188	Pamr1	428.011	321.971	534.051	1.65869	0.730048	2.31779e-09	8.91652e-08
ENSMUSG00000032783	Troap	1313.72	988.917	1638.53	1.65689	0.728479	1.05053e-08	3.56844e-07
ENSMUSG00000026051	1500015O10Rik	132.1	99.4482	164.751	1.65665	0.728272	5.44929e-05	0.000861365
ENSMUSG00000048706	D4Bwg0951e	254.363	191.586	317.141	1.65535	0.727135	1.57742e-05	0.000287577
ENSMUSG00000035551	Igfbpl1	1294.85	975.621	1614.09	1.65442	0.726325	2.26488e-07	6.14348e-06
ENSMUSG00000028553	Angptl3	121.424	91.5059	151.342	1.6539	0.725871	0.000881993	0.00940527
ENSMUSG00000025758	Plk4	2295.12	1729.99	2860.25	1.65333	0.725377	9.18189e-10	3.80045e-08
ENSMUSG00000031712	Il15	750.309	565.582	935.036	1.65323	0.725285	4.26818e-08	1.32682e-06
ENSMUSG00000027568	Ntsr1	32.5858	24.5642	40.6074	1.65311	0.725185	0.000972781	0.0102463
ENSMUSG00000021391	Cenpp	852.257	642.564	1061.95	1.65268	0.724806	4.18561e-07	1.07904e-05
ENSMUSG00000027469	Tpx2	5921.04	4464.3	7377.78	1.65262	0.724751	2.49165e-10	1.13193e-08
ENSMUSG00000028587	Orc1	328.691	247.914	409.468	1.65166	0.723913	9.0683e-06	0.000174578
ENSMUSG00000053898	Ech1	43334.4	32689.4	53979.3	1.65128	0.723583	1.73338e-11	9.49576e-10
ENSMUSG00000022286	Grhl2	309.746	233.755	385.737	1.65018	0.722623	1.4525e-05	0.00026698
ENSMUSG00000021062	Rab15	209.273	157.966	260.58	1.6496	0.722112	0.000211363	0.00278876
ENSMUSG00000018893	Mb	259653	196027	323279	1.64915	0.721724	1.29321e-11	7.20812e-10
ENSMUSG00000036902	Neto2	885.753	668.737	1102.77	1.64903	0.721621	7.09404e-09	2.50093e-07
ENSMUSG00000063873	Slc24a3	288.793	218.057	359.529	1.64878	0.721401	6.38601e-06	0.000128012
ENSMUSG00000038201	Kcna7	91.959	69.4508	114.467	1.64818	0.720872	0.00657011	0.0483054
ENSMUSG00000039639	Kcne1	21646	16348.5	26943.5	1.64807	0.720776	6.5068e-11	3.25355e-09
ENSMUSG00000030867	Plk1	2613.34	1975.71	3250.97	1.64547	0.718497	2.11255e-09	8.18329e-08
ENSMUSG00000032254	Kif23	3963.79	2998.51	4929.06	1.64384	0.717068	4.4677e-10	1.95034e-08
ENSMUSG00000020277	Pfkl	13736.7	10393.3	17080.1	1.64337	0.716659	2.2487e-10	1.03417e-08
ENSMUSG00000020330	Hmmr	5793.03	4383.7	7202.35	1.64298	0.716319	1.76935e-10	8.23892e-09
ENSMUSG00000041064	Pif1	1251.07	947.258	1554.89	1.64147	0.714985	8.40403e-09	2.89427e-07
ENSMUSG00000023004	Tuba1b	34140.3	25849.6	42431	1.64146	0.71498	9.55952e-10	3.9349e-08
ENSMUSG00000006715	Gmnn	2767.84	2096.14	3439.55	1.6409	0.714484	3.85328e-09	1.43541e-07
ENSMUSG00000023885	Thbs2	8544.45	6474.06	10614.8	1.63959	0.713338	2.03863e-12	1.3056e-10
ENSMUSG00000086233	Gm11816	119.116	90.3104	147.921	1.63792	0.711862	0.0016143	0.0156512
ENSMUSG00000060887	Gm12960	177.101	134.318	219.883	1.63704	0.711086	0.000305177	0.00383418
ENSMUSG00000024590	Lmnb1	10976.5	8329.89	13623.1	1.63545	0.709687	6.48194e-10	2.78076e-08
ENSMUSG00000041974	2310008H04Rik	703.167	533.703	872.63	1.63505	0.709334	1.60711e-07	4.54116e-06
ENSMUSG00000029516	Cit	2176.1	1652.35	2699.85	1.63395	0.708362	4.30025e-09	1.59395e-07
ENSMUSG00000024397	Aif1	102.834	78.0903	127.578	1.63373	0.708169	0.00291436	0.0254947
ENSMUSG00000012443	Kif11	7301.1	5546.3	9055.9	1.63278	0.707332	7.70368e-10	3.24877e-08
ENSMUSG00000037313	Tacc3	4423.2	3360.32	5486.07	1.6326	0.707175	1.2585e-09	5.09578e-08
ENSMUSG00000047686	Zcchc5	1513.83	1150.32	1877.34	1.63202	0.70666	5.89586e-09	2.12546e-07
ENSMUSG00000066191	Anks6	535.816	407.334	664.297	1.63084	0.705614	1.28778e-06	3.00451e-05
ENSMUSG00000021898	Asb14	1236.19	940.207	1532.18	1.62962	0.704539	3.69199e-10	1.62761e-08
ENSMUSG00000036699	Zcchc12	92.6082	70.4554	114.761	1.62885	0.70385	0.00455945	0.0362405
ENSMUSG00000032915	Emr4	51.264	39.01	63.518	1.62825	0.703322	0.00606245	0.0452729
ENSMUSG00000027018	Hat1	5057.99	3849.82	6266.16	1.62765	0.702791	4.62256e-09	1.69653e-07
ENSMUSG00000073079	Srp54c	182.097	138.688	225.507	1.62601	0.701334	0.000559128	0.00643184
ENSMUSG00000031618	Nr3c2	1283.4	977.649	1589.16	1.62549	0.700873	4.30581e-10	1.88704e-08
ENSMUSG00000026622	Nek2	2547.71	1941.14	3154.29	1.62497	0.700409	6.9996e-09	2.47153e-07
ENSMUSG00000046561	Arsj	283.936	216.335	351.537	1.62496	0.700406	1.94492e-05	0.000347212
ENSMUSG00000026779	Mastl	1365.55	1040.67	1690.42	1.62436	0.699872	4.24212e-08	1.32055e-06
ENSMUSG00000020739	Nup85	3731.73	2844.26	4619.2	1.62404	0.699589	6.58114e-09	2.33484e-07
ENSMUSG00000038894	Irs2	1784.56	1361.01	2208.1	1.62239	0.698122	1.90991e-10	8.81991e-09
ENSMUSG00000042116	Vwa1	1351.79	1031.16	1672.42	1.62189	0.697675	1.37989e-09	5.50748e-08
ENSMUSG00000026062	Slc9a2	131.231	100.11	162.352	1.62174	0.697539	0.000427119	0.00507824
ENSMUSG00000025930	Msc	247.213	188.634	305.793	1.62109	0.696962	5.2136e-05	0.000829389
ENSMUSG00000057286	St6galnac2	741.094	565.61	916.578	1.62051	0.69645	1.14929e-07	3.3404e-06
ENSMUSG00000003469	Phyhip	1777.28	1356.44	2198.12	1.6205	0.696439	7.68227e-08	2.29248e-06
ENSMUSG00000028214	Gem	579.982	442.708	717.257	1.62016	0.696136	1.21729e-07	3.52431e-06
ENSMUSG00000019990	Pde7b	1601.71	1222.76	1980.65	1.61982	0.695834	6.41021e-09	2.28508e-07
ENSMUSG00000063594	Gng8	85.8322	65.5618	106.103	1.61836	0.694535	0.00487654	0.038244
ENSMUSG00000035279	A430110N23Rik	1592.91	1216.9	1968.93	1.61799	0.694199	2.63213e-10	1.1885e-08
ENSMUSG00000021280	1200009I06Rik	498.366	380.816	615.915	1.61735	0.693635	4.76565e-07	1.21456e-05
ENSMUSG00000031226	2610029G23Rik	1585.4	1211.97	1958.83	1.61624	0.692638	2.75089e-07	7.33713e-06
ENSMUSG00000048416	Mlf1	21958.7	16786.5	27130.9	1.61624	0.692638	6.04128e-11	3.07583e-09
ENSMUSG00000026389	Steap3	2791.85	2136.22	3447.47	1.61381	0.690475	2.39416e-08	7.69955e-07
ENSMUSG00000032555	Topbp1	6909.75	5287.2	8532.3	1.61376	0.690429	2.69313e-09	1.01851e-07
ENSMUSG00000042340	Ctf1	184.418	141.237	227.599	1.61147	0.688378	0.00103779	0.0107887
ENSMUSG00000041126	H2afv	4700.09	3599.99	5800.2	1.61117	0.688111	4.3998e-10	1.92446e-08
ENSMUSG00000031004	Mki67	19336.8	14817.8	23855.9	1.60995	0.687019	6.74286e-10	2.88716e-08
ENSMUSG00000006205	Htra1	5117.07	3921.82	6312.32	1.60954	0.686648	8.46785e-11	4.17803e-09
ENSMUSG00000024989	Cep55	2278.82	1746.68	2810.97	1.60933	0.686458	7.77046e-10	3.27076e-08
ENSMUSG00000026043	Col3a1	168968	129514	208422	1.60926	0.686396	4.96931e-11	2.583e-09
ENSMUSG00000022225	Cma1	461.493	353.867	569.119	1.60829	0.685526	7.93272e-09	2.76175e-07
ENSMUSG00000028687	Mutyh	375.653	288.22	463.086	1.60671	0.684111	4.44185e-05	0.00072256
ENSMUSG00000001525	Tubb5	69618.6	53432.1	85805.1	1.60587	0.683357	7.18445e-09	2.52484e-07
ENSMUSG00000023019	Gpd1	2118.57	1626.46	2610.68	1.60513	0.682692	2.8109e-08	9.00104e-07
ENSMUSG00000033342	4833424O15Rik	103.55	79.5177	127.583	1.60446	0.682087	0.000928284	0.00983321
ENSMUSG00000028312	Smc2	5011.79	3848.67	6174.91	1.60443	0.682057	2.09233e-09	8.12529e-08
ENSMUSG00000079429	Heatr7b1	490.013	376.347	603.679	1.60405	0.68172	1.2874e-05	0.000239788
ENSMUSG00000056228	Cars2	2032.06	1560.75	2503.37	1.60395	0.681629	6.3128e-08	1.91189e-06
ENSMUSG00000028175	Depdc1a	1981.25	1522.93	2439.56	1.60189	0.679776	1.46991e-08	4.86005e-07
ENSMUSG00000048967	Yjefn3	257.066	197.619	316.512	1.60162	0.679533	0.000155797	0.00216421
ENSMUSG00000085151	1110018N20Rik	307.23	236.266	378.194	1.60071	0.678716	0.000154892	0.00215298
ENSMUSG00000005628	Tmod4	182.274	140.268	224.28	1.59894	0.677114	0.000751689	0.00824792
ENSMUSG00000054717	Hmgb2	9953.26	7660.56	12246	1.59857	0.676783	9.43408e-10	3.89043e-08
ENSMUSG00000025348	Itga7	6519.13	5018.66	8019.6	1.59796	0.676228	7.1108e-09	2.50289e-07
ENSMUSG00000020895	Tmem107	403.964	311.113	496.815	1.5969	0.675271	2.7862e-05	0.000474291
ENSMUSG00000027353	Mcm8	829.407	638.934	1019.88	1.59622	0.674662	2.00649e-06	4.50271e-05
ENSMUSG00000036885	Arhgef26	581.457	448.004	714.909	1.59577	0.674249	2.29655e-07	6.22185e-06
ENSMUSG00000027329	Spef1	1009.11	777.589	1240.63	1.59548	0.673995	2.37646e-07	6.43055e-06
ENSMUSG00000060550	H2-Q7	229.671	177.01	282.332	1.59501	0.673563	0.000802598	0.00870397
ENSMUSG00000024186	Rgs11	188.86	145.564	232.156	1.59487	0.673442	7.98523e-05	0.00119945
ENSMUSG00000030600	Lrfn1	141.831	109.438	174.224	1.59199	0.670834	0.00624639	0.0463232
ENSMUSG00000021822	Plau	647.757	500.03	795.484	1.59087	0.669817	1.00109e-06	2.38289e-05
ENSMUSG00000020684	Rasl10b	3803.01	2937.64	4668.38	1.58916	0.668267	7.72973e-08	2.30356e-06
ENSMUSG00000023104	Rfc2	3609.21	2788.94	4429.47	1.58823	0.667419	1.18848e-08	3.99456e-07
ENSMUSG00000041695	Kcnj2	4985.94	3852.81	6119.06	1.58821	0.667399	3.60856e-10	1.59713e-08
ENSMUSG00000027219	Slc28a2	2615.98	2021.77	3210.19	1.58782	0.667044	6.05448e-09	2.17913e-07
ENSMUSG00000041378	Cldn5	4588.48	3548.67	5628.28	1.58603	0.665417	3.70386e-08	1.16598e-06
ENSMUSG00000062248	Cks2	2333.11	1804.41	2861.81	1.58601	0.665399	2.43769e-09	9.32959e-08
ENSMUSG00000061607	Mdc1	7047.96	5452.08	8643.85	1.58542	0.664869	1.42706e-08	4.74245e-07
ENSMUSG00000023345	Poc1a	1083.82	838.552	1329.08	1.58497	0.664459	1.58853e-05	0.00028913
ENSMUSG00000028933	Xrcc2	994.22	769.312	1219.13	1.5847	0.664208	8.08707e-07	1.96686e-05
ENSMUSG00000040543	Pitpnm3	519.322	401.94	636.703	1.58408	0.663642	5.85909e-06	0.000118405
ENSMUSG00000043448	Gjc2	66.3597	51.382	81.3374	1.58299	0.662656	0.00228076	0.0207816
ENSMUSG00000022504	Ciita	135.537	105.012	166.061	1.58135	0.661156	0.00137434	0.0136767
ENSMUSG00000015981	Stk32c	314.049	243.429	384.67	1.58021	0.66012	2.43149e-05	0.000420637
ENSMUSG00000086298	Gm11716	1528.63	1184.9	1872.35	1.58018	0.660085	8.03384e-08	2.38782e-06
ENSMUSG00000070713	Gm10282	3988.91	3093.03	4884.78	1.57929	0.659273	2.06037e-08	6.72283e-07
ENSMUSG00000026442	Nfasc	45.8006	35.549	56.0523	1.57676	0.656965	0.000614784	0.00699645
ENSMUSG00000048458	6530418L21Rik	3733.23	2897.81	4568.64	1.57659	0.656805	1.20049e-10	5.79529e-09
ENSMUSG00000022385	Gtse1	1587.41	1232.79	1942.02	1.5753	0.655631	3.93333e-07	1.0187e-05
ENSMUSG00000045498	Pcdhb3	113.058	87.8364	138.28	1.57429	0.654703	0.00567743	0.0431583
ENSMUSG00000007950	Abhd8	1978.18	1537.07	2419.28	1.57396	0.654398	3.94217e-07	1.01981e-05
ENSMUSG00000004415	Emid2	1127.29	876.885	1377.7	1.57113	0.651803	8.19888e-07	1.98756e-05
ENSMUSG00000038233	Fam198a	98.8637	76.9176	120.81	1.57064	0.651352	0.00447887	0.0357307
ENSMUSG00000048402	Gli2	757.381	589.587	925.175	1.56919	0.650022	4.57847e-06	9.52824e-05
ENSMUSG00000039470	Zdhhc2	2333.41	1816.61	2850.21	1.56897	0.649816	3.45494e-08	1.09341e-06
ENSMUSG00000028678	Kif2c	2058.95	1603.09	2514.81	1.56873	0.649598	9.17649e-08	2.7166e-06
ENSMUSG00000008658	Rbfox1	1982.04	1543.95	2420.12	1.56749	0.648458	2.33016e-09	8.9487e-08
ENSMUSG00000037846	Rtkn2	359.231	279.885	438.577	1.56699	0.647998	3.21095e-05	0.000535982
ENSMUSG00000028773	Fabp3	159355	124159	194550	1.56694	0.64795	1.73951e-10	8.11686e-09
ENSMUSG00000038252	Ncapd2	13042.8	10163.2	15922.4	1.56667	0.647706	2.30954e-08	7.44886e-07
ENSMUSG00000022391	Rangap1	9306.02	7251.67	11360.4	1.56659	0.647625	7.32282e-08	2.194e-06
ENSMUSG00000020889	Nr1d1	2708.03	2111.12	3304.93	1.56549	0.646613	1.30779e-09	5.26676e-08
ENSMUSG00000028614	Tmem48	3447.74	2687.89	4207.6	1.56539	0.646522	2.17145e-07	5.89721e-06
ENSMUSG00000002500	Rpl3l	536.264	418.235	654.293	1.56441	0.645622	1.0023e-06	2.38323e-05
ENSMUSG00000068744	Psrc1	642.907	501.452	784.362	1.56418	0.645408	3.07459e-05	0.000516305
ENSMUSG00000022960	Donson	1063.69	829.878	1297.49	1.56347	0.644755	1.12666e-06	2.65353e-05
ENSMUSG00000005373	Mlxipl	1611.07	1257.2	1964.94	1.56295	0.644272	1.48452e-07	4.21918e-06
ENSMUSG00000079654	Prrt4	365.793	285.545	446.041	1.56207	0.643457	9.66349e-06	0.000184291
ENSMUSG00000051359	Ncald	1597.21	1248.25	1946.17	1.55912	0.640734	3.62151e-08	1.14328e-06
ENSMUSG00000028438	Kif24	470.742	367.912	573.571	1.55899	0.640613	0.000145379	0.00203466
ENSMUSG00000019235	Rps6kl1	243.813	190.585	297.041	1.55858	0.640232	0.000277773	0.00354569
ENSMUSG00000020363	Gfpt2	1130.37	883.819	1376.93	1.55793	0.639634	9.90665e-08	2.91731e-06
ENSMUSG00000029838	Ptn	4428.55	3462.91	5394.19	1.5577	0.63942	1.27678e-10	6.11079e-09
ENSMUSG00000089762	Ier5l	479.118	374.68	583.555	1.55748	0.639212	0.000167956	0.00229602
ENSMUSG00000021281	Tnfaip2	1631.54	1276.25	1986.83	1.55677	0.638559	4.25857e-07	1.09436e-05
ENSMUSG00000079598	Clec2l	154.133	120.587	187.678	1.55637	0.638188	0.00537975	0.0414487
ENSMUSG00000028223	Decr1	25978.4	20333.6	31623.3	1.55522	0.637122	1.19394e-09	4.86077e-08
ENSMUSG00000033031	C330027C09Rik	3777.49	2957.18	4597.79	1.55479	0.636718	4.58272e-09	1.68619e-07
ENSMUSG00000027797	Dclk1	1015.92	795.436	1236.4	1.55436	0.636322	6.07697e-09	2.1837e-07
ENSMUSG00000091937	Gm3646	256.15	200.565	311.736	1.55429	0.636251	0.000751447	0.00824792
ENSMUSG00000036611	Eepd1	2727.2	2135.84	3318.55	1.55374	0.635749	6.44065e-08	1.94534e-06
ENSMUSG00000027654	Fam83d	2181.69	1708.67	2654.72	1.55368	0.635685	1.3403e-06	3.1108e-05
ENSMUSG00000048107	Kctd12	4150.33	3251.31	5049.35	1.55302	0.635076	9.30834e-10	3.84567e-08
ENSMUSG00000021259	Cyp46a1	227.294	178.129	276.459	1.55201	0.63414	0.00341687	0.0288408
ENSMUSG00000032380	Dapk2	144.561	113.332	175.791	1.55111	0.633305	0.00131805	0.013211
ENSMUSG00000023439	Gnb3	200.302	157.045	243.559	1.55089	0.633095	0.00128362	0.0129293
ENSMUSG00000039137	Whrn	1023.41	802.409	1244.42	1.55085	0.633063	4.99937e-06	0.000102798
ENSMUSG00000027339	Rassf2	1466.38	1149.74	1783.01	1.55079	0.633001	3.93594e-08	1.23383e-06
ENSMUSG00000017718	Afmid	1157.9	907.964	1407.84	1.55054	0.632773	2.27721e-06	5.0444e-05
ENSMUSG00000026589	Sec16b	543.471	426.196	660.745	1.55033	0.632576	7.72843e-06	0.000152058
ENSMUSG00000020846	Fam101b	5146.23	4036.54	6255.92	1.54982	0.632102	8.14051e-09	2.82091e-07
ENSMUSG00000022367	Has2	278.462	218.463	338.462	1.54928	0.6316	3.09054e-05	0.000518204
ENSMUSG00000025324	Atp10a	445.676	349.689	541.664	1.54899	0.631326	2.97616e-06	6.41467e-05
ENSMUSG00000054446	Cpa1	862.042	676.495	1047.59	1.54855	0.63092	2.78573e-06	6.03332e-05
ENSMUSG00000032782	Cntrob	2423.42	1902.41	2944.43	1.54774	0.630161	3.11708e-07	8.24495e-06
ENSMUSG00000022490	Ppp1r1a	1146.18	900.058	1392.3	1.5469	0.629383	2.99736e-06	6.45414e-05
ENSMUSG00000025140	Pycr1	466.764	366.62	566.909	1.54631	0.628832	8.92714e-06	0.000172183
ENSMUSG00000005994	Tyrp1	56.6954	44.533	68.8578	1.54622	0.628747	3.0955e-05	0.000518646
ENSMUSG00000030499	Kctd15	345.93	271.764	420.096	1.54581	0.628363	2.13578e-05	0.000377366
ENSMUSG00000052396	Mogat2	162.215	127.443	196.986	1.54569	0.628248	0.00147233	0.0145225
ENSMUSG00000038370	Pcp4l1	10874.5	8543.91	13205.1	1.54556	0.628125	1.98768e-08	6.51417e-07
ENSMUSG00000063455	D630045J12Rik	715.554	562.372	868.736	1.54477	0.627394	4.88085e-06	0.000100875
ENSMUSG00000058625	Gm17383	1967.23	1546.26	2388.2	1.5445	0.627142	1.91871e-06	4.32309e-05
ENSMUSG00000041828	Abca8a	5568.54	4378.32	6758.75	1.54368	0.626377	6.10658e-09	2.19082e-07
ENSMUSG00000029778	Adcyap1r1	785.79	617.864	953.716	1.54357	0.626271	2.10659e-07	5.72803e-06
ENSMUSG00000033152	Podxl2	2677.92	2106.04	3249.81	1.54309	0.625824	1.04661e-07	3.06991e-06
ENSMUSG00000037544	Dlgap5	2294.88	1805.51	2784.26	1.54209	0.624885	1.09569e-07	3.20128e-06
ENSMUSG00000046341	Gm11223	5014.94	3947.93	6081.95	1.54054	0.623437	1.12243e-08	3.78965e-07
ENSMUSG00000033685	Ucp2	13780.5	10849.5	16711.6	1.5403	0.623215	1.32945e-07	3.82428e-06
ENSMUSG00000040084	Bub1b	5590.39	4404.06	6776.72	1.53874	0.621753	6.23682e-08	1.89144e-06
ENSMUSG00000049307	Fut4	122.494	96.5236	148.464	1.53812	0.621164	0.00663027	0.0486837
ENSMUSG00000020029	Nudt4	20742.4	16347	25137.9	1.53777	0.62084	1.43094e-08	4.74525e-07
ENSMUSG00000042254	Cilp	142.59	112.402	172.779	1.53716	0.620266	1.42633e-05	0.000262602
ENSMUSG00000026764	Kif5c	191.788	151.198	232.378	1.53691	0.620035	0.000735024	0.00810484
ENSMUSG00000027223	Mapk8ip1	692.314	545.837	838.791	1.5367	0.61984	8.61402e-06	0.000167128
ENSMUSG00000026646	Suv39h2	402.478	317.365	487.59	1.53637	0.619523	5.70052e-05	0.000897811
ENSMUSG00000026890	Lhx6	697.205	549.803	844.608	1.5362	0.619367	4.15563e-05	0.000680457
ENSMUSG00000036752	Tubb4b	17848.9	14082	21615.8	1.535	0.618238	2.98422e-07	7.91226e-06
ENSMUSG00000031647	Mfap3l	438.489	346.136	530.842	1.53363	0.616946	4.10209e-05	0.000672184
ENSMUSG00000036777	Anln	8344.95	6589.13	10100.8	1.53295	0.616307	1.16889e-07	3.39296e-06
ENSMUSG00000084353	Gm15452	452.539	357.648	547.43	1.53064	0.614134	1.22049e-05	0.000228277
ENSMUSG00000082809	Gm14150	595.888	471.01	720.766	1.53026	0.613773	0.000768333	0.0084099
ENSMUSG00000020891	Alox8	56.6694	44.7958	68.543	1.53012	0.613645	0.00265029	0.0235627
ENSMUSG00000027242	Wdr76	2187.79	1729.65	2645.93	1.52975	0.613299	3.68899e-07	9.64359e-06
ENSMUSG00000051323	Pcdh19	1181.46	934.274	1428.64	1.52914	0.612722	2.8465e-07	7.55607e-06
ENSMUSG00000060044	Tmem26	213.662	168.985	258.339	1.52876	0.612366	0.000399751	0.00481372
ENSMUSG00000037894	H2afz	1374.48	1087.31	1661.65	1.52823	0.611857	1.64466e-06	3.75099e-05
ENSMUSG00000017550	Atad5	1251.77	990.275	1513.27	1.52814	0.611773	5.116e-06	0.000104906
ENSMUSG00000047534	Mis18bp1	2098.98	1660.55	2537.41	1.52805	0.611691	3.16544e-07	8.35311e-06
ENSMUSG00000052957	Gas1	4301.68	3403.18	5200.18	1.52804	0.61168	3.67097e-08	1.15726e-06
ENSMUSG00000026824	Kcnj3	2095.79	1658.06	2533.52	1.528	0.611649	1.15544e-06	2.70988e-05
ENSMUSG00000028664	Ephb2	215.926	170.909	260.943	1.52679	0.610505	0.000376344	0.00458401
ENSMUSG00000024301	Kifc5b	1113.71	881.777	1345.64	1.52605	0.609805	6.89122e-06	0.000137156
ENSMUSG00000032218	Ccnb2	3747.59	2967.17	4528.01	1.52604	0.609793	1.12129e-07	3.26327e-06
ENSMUSG00000026249	Serpine2	4541.96	3596.19	5487.72	1.52598	0.609739	1.28199e-08	4.27029e-07
ENSMUSG00000046491	C1qtnf2	553.105	438.004	668.207	1.52557	0.609351	8.0632e-06	0.000157811
ENSMUSG00000020785	Camkk1	170.67	135.178	206.162	1.52511	0.608916	0.000713946	0.00792324
ENSMUSG00000064280	Ccdc146	576.319	456.53	696.109	1.52478	0.608606	3.12265e-05	0.000522412
ENSMUSG00000028681	Ptch2	570.395	451.882	688.907	1.52453	0.608364	7.73183e-05	0.00117003
ENSMUSG00000040875	Osbpl10	269.76	213.874	325.646	1.52261	0.606547	0.000551272	0.00635783
ENSMUSG00000096006		193.401	153.35	233.452	1.52235	0.606299	0.000834618	0.00897716
ENSMUSG00000027883	Gpsm2	1692.6	1342.69	2042.5	1.5212	0.605207	1.48561e-07	4.21918e-06
ENSMUSG00000027115	Kif18a	857.284	680.272	1034.3	1.52041	0.604464	2.83207e-06	6.12774e-05
ENSMUSG00000037016	Frem2	4392.27	3485.77	5298.77	1.52012	0.604181	2.26726e-08	7.34429e-07
ENSMUSG00000006398	Cdc20	4046.65	3212.33	4880.96	1.51945	0.603547	1.97092e-07	5.41181e-06
ENSMUSG00000022340	Sybu	212.89	169.025	256.756	1.51904	0.60316	0.00287237	0.0251865
ENSMUSG00000035439	Haus8	4805.59	3816.77	5794.42	1.51815	0.602312	1.62557e-07	4.55329e-06
ENSMUSG00000033970	Rfc3	1409.04	1119.12	1698.96	1.51812	0.602287	2.66555e-06	5.80678e-05
ENSMUSG00000042182	Bend6	179.921	142.932	216.91	1.51758	0.601768	0.00109477	0.0112658
ENSMUSG00000004266	Ptpn6	439.431	349.129	529.733	1.5173	0.601506	4.03832e-05	0.000663124
ENSMUSG00000090889	Gm17428	729.8	579.992	879.608	1.51659	0.600828	2.83298e-05	0.000481154
ENSMUSG00000028560	Usp1	5605.08	4454.82	6755.35	1.51641	0.600665	2.76149e-07	7.35662e-06
ENSMUSG00000032850	Rnft2	506.624	402.896	610.352	1.51491	0.599234	0.00175618	0.0167889
ENSMUSG00000031385	Plxnb3	173.666	138.141	209.192	1.51434	0.598691	0.00122715	0.0124221
ENSMUSG00000030108	Slc6a13	384.726	306.08	463.372	1.51389	0.598263	0.000208235	0.00276004
ENSMUSG00000042082	Arsb	1777.42	1414.13	2140.72	1.51381	0.598183	7.90271e-07	1.92621e-05
ENSMUSG00000042918	Mamstr	1422.33	1132.13	1712.53	1.51267	0.597093	2.14067e-05	0.000377633
ENSMUSG00000035835	BC005764	592.51	471.625	713.394	1.51263	0.597058	5.70308e-06	0.000115566
ENSMUSG00000038034	Igsf8	988.772	787.072	1190.47	1.51253	0.596965	0.000173677	0.00236699
ENSMUSG00000021376	Tpmt	575.459	458.084	692.835	1.51246	0.5969	4.55615e-05	0.000737931
ENSMUSG00000002020	Ltbp2	543.25	432.459	654.041	1.51238	0.596817	3.15457e-12	1.95855e-10
ENSMUSG00000056366	Fabp3-ps1	38486.8	30654.8	46318.7	1.51097	0.595479	1.45703e-08	4.82462e-07
ENSMUSG00000030641	4632434I11Rik	769.243	612.93	925.557	1.51005	0.594599	2.42452e-05	0.000419778
ENSMUSG00000024743	Syt7	3107.58	2476.56	3738.6	1.50959	0.59416	1.61969e-07	4.55329e-06
ENSMUSG00000025154	Arhgap19	1771.64	1412.01	2131.26	1.50939	0.593961	5.79554e-07	1.44683e-05
ENSMUSG00000019890	Nts	1006.31	802.136	1210.48	1.50907	0.593663	5.20119e-06	0.000106166
ENSMUSG00000090626	Tex9	850.803	678.231	1023.38	1.50889	0.593487	3.08754e-05	0.00051809
ENSMUSG00000028132	Tmem56	174.038	138.807	209.269	1.50763	0.592278	0.00092272	0.00979284
ENSMUSG00000001333	Sync	454.117	362.239	545.994	1.50728	0.591945	2.49693e-05	0.000430624
ENSMUSG00000036928	Stag3	186.796	149.009	224.582	1.50717	0.591844	0.00272192	0.0240846
ENSMUSG00000028693	Nasp	10588.8	8446.89	12730.7	1.50714	0.591817	3.87175e-07	1.00508e-05
ENSMUSG00000006219	Fblim1	11869.5	9470.97	14268.1	1.50651	0.591209	5.50297e-08	1.67799e-06
ENSMUSG00000038248	Sobp	2345.64	1871.8	2819.48	1.5063	0.591004	1.07903e-06	2.55211e-05
ENSMUSG00000050211	Pla2g4e	1185.05	945.677	1424.41	1.50624	0.590948	3.33336e-05	0.000554468
ENSMUSG00000075266	Cenpw	552.703	441.494	663.911	1.50378	0.588595	1.22891e-05	0.000229468
ENSMUSG00000026748	Plxdc2	920.448	735.337	1105.56	1.50347	0.588296	1.8095e-07	5.00547e-06
ENSMUSG00000039298	Cdk5rap2	3524.05	2815.55	4232.55	1.50328	0.588113	5.33662e-07	1.34778e-05
ENSMUSG00000045312	Lhfpl2	3674.39	2936.52	4412.27	1.50255	0.587414	2.41968e-08	7.77045e-07
ENSMUSG00000014837	4931428F04Rik	798.955	638.623	959.286	1.50212	0.586996	5.99646e-05	0.000939222
ENSMUSG00000039481	Nrtn	641.655	512.891	770.42	1.50211	0.586993	0.00046914	0.00551881
ENSMUSG00000028044	Cks1b	2079.42	1662.55	2496.29	1.50148	0.586388	2.11334e-06	4.7047e-05
ENSMUSG00000028378	Ptgr1	758.658	606.781	910.535	1.5006	0.585538	2.0638e-05	0.000365806
ENSMUSG00000048582	Gja3	1834.71	1468.12	2201.3	1.49941	0.584392	3.03377e-05	0.000510217
ENSMUSG00000037725	Ckap2	3199.72	2560.65	3838.79	1.49915	0.584141	1.74231e-07	4.84358e-06
ENSMUSG00000032036	Kirrel3	103.312	82.6889	123.936	1.49882	0.583825	0.00680175	0.0497467
ENSMUSG00000034206	Polq	729.395	583.892	874.897	1.49839	0.583411	8.32277e-05	0.00124346
ENSMUSG00000082163	Gm14276	315.312	252.432	378.192	1.49819	0.583223	0.00107274	0.011085
ENSMUSG00000094910		116.432	93.2143	139.65	1.49816	0.583191	0.0018545	0.0175561
ENSMUSG00000041930	BC057022	609.815	488.275	731.354	1.49783	0.582876	9.70351e-06	0.000184896
ENSMUSG00000041594	Tmtc4	1806.61	1447.25	2165.96	1.4966	0.581693	7.03688e-07	1.72837e-05
ENSMUSG00000021096	Ppm1a	9194.32	7365.89	11022.8	1.49646	0.581552	3.28981e-08	1.04298e-06
ENSMUSG00000023832	Acat2	897.914	719.352	1076.48	1.49645	0.581546	0.000172081	0.00234666
ENSMUSG00000028782	Bai2	509.679	408.334	611.024	1.49638	0.58148	0.000134866	0.00190785
ENSMUSG00000059974	Ntm	484.673	388.345	581.001	1.4961	0.581203	1.04968e-05	0.000198994
ENSMUSG00000028832	Stmn1	4126.23	3306.66	4945.81	1.49571	0.580833	7.08117e-07	1.73734e-05
ENSMUSG00000001473	Tubb6	8427.84	6756.74	10098.9	1.49465	0.579803	2.57919e-06	5.64066e-05
ENSMUSG00000024042	Sik1	5636.05	4523.78	6748.31	1.49174	0.576998	3.13042e-08	9.95278e-07
ENSMUSG00000025551	Fgf14	145.379	116.696	174.062	1.49159	0.576851	0.00365521	0.0304047
ENSMUSG00000041147	Brca2	1567.99	1258.67	1877.32	1.49151	0.576772	2.23296e-05	0.000392057
ENSMUSG00000036678	Aaas	1947.27	1563.23	2331.32	1.49135	0.576623	1.06884e-05	0.000202284
ENSMUSG00000029687	Ezh2	4709.47	3781.07	5637.87	1.49108	0.576357	9.24641e-07	2.2127e-05
ENSMUSG00000022421	Nptxr	791.985	636.3	947.67	1.48934	0.574676	1.33753e-05	0.000247887
ENSMUSG00000055805	Fmnl1	949.13	762.631	1135.63	1.48909	0.574434	6.75728e-06	0.00013461
ENSMUSG00000074634	Gm7120	248.13	199.38	296.881	1.48902	0.574362	0.000126173	0.00179519
ENSMUSG00000020105	Lrig3	215.118	172.856	257.379	1.48898	0.574322	0.00157688	0.0153505
ENSMUSG00000000037	Scml2	835.115	671.051	999.179	1.48898	0.574321	9.35409e-06	0.000179283
ENSMUSG00000007030	D17H6S56E-3	266.365	214.176	318.554	1.48735	0.572741	0.00210628	0.019518
ENSMUSG00000028066	Pmf1	2516.87	2024.66	3009.08	1.48621	0.571643	1.29248e-05	0.000240534
ENSMUSG00000032363	Adamts7	4674.45	3761.72	5587.18	1.48527	0.570728	6.95459e-06	0.000138294
ENSMUSG00000037243	Zfp692	1267.04	1020.27	1513.8	1.48372	0.569222	3.19751e-05	0.000534138
ENSMUSG00000028393	Alad	2620.28	2110.03	3130.53	1.48365	0.569148	3.30504e-06	7.07576e-05
ENSMUSG00000049265	Kcnk3	9154.48	7375.54	10933.4	1.48239	0.567923	1.93008e-06	4.34433e-05
ENSMUSG00000039114	Nrn1	409.675	330.097	489.254	1.48215	0.567695	1.61577e-05	0.000293371
ENSMUSG00000022040	Ephx2	15045.5	12128.9	17962.2	1.48095	0.566523	1.70874e-07	4.76738e-06
ENSMUSG00000070858	Gm1673	124.745	100.584	148.906	1.48041	0.565994	0.00623491	0.0462978
ENSMUSG00000035948	Acss3	628.112	506.497	749.727	1.48022	0.565811	2.04472e-06	4.57473e-05
ENSMUSG00000033044	Dhrs7c	9302.47	7501.41	11103.5	1.48019	0.565787	3.63785e-06	7.74376e-05
ENSMUSG00000026177	Slc11a1	205.034	165.384	244.684	1.47949	0.565099	0.00363173	0.0302432
ENSMUSG00000030844	Rgs10	319.063	257.398	380.728	1.47914	0.564762	0.000253322	0.00327283
ENSMUSG00000032224	Fam81a	2333.12	1883.29	2782.95	1.47771	0.563361	9.3406e-06	0.000179203
ENSMUSG00000023800	Tiam2	942.476	760.785	1124.17	1.47764	0.563295	5.33905e-06	0.000108781
ENSMUSG00000052316	Lrrc15	343.994	277.696	410.291	1.47748	0.563142	0.000197402	0.00264041
ENSMUSG00000029581	Fscn1	10087.8	8148.48	12027	1.47599	0.561679	7.32545e-07	1.79333e-05
ENSMUSG00000037580	Gch1	692.459	559.434	825.484	1.47557	0.561272	0.000154456	0.00214959
ENSMUSG00000070802	Pnmal2	1122.67	907.086	1338.25	1.47533	0.561039	1.46542e-05	0.000268914
ENSMUSG00000020866	Cacna1g	12766.7	10315.5	15218	1.47526	0.560966	2.38448e-07	6.44444e-06
ENSMUSG00000040466	Blvrb	1101.98	890.624	1313.34	1.47463	0.560357	5.1683e-05	0.000823942
ENSMUSG00000028047	Thbs3	2176.16	1758.87	2593.46	1.47451	0.560233	4.31713e-06	9.03486e-05
ENSMUSG00000042589	Cux2	1445.28	1168.27	1722.29	1.47422	0.559952	7.43514e-06	0.000146417
ENSMUSG00000021047	Nova1	354.719	286.733	422.706	1.47421	0.559947	0.000790411	0.00860101
ENSMUSG00000002477	Snrpd1	3022.8	2443.61	3602	1.47405	0.559785	3.50669e-06	7.49311e-05
ENSMUSG00000033174	Mgll	13565.2	10966.3	16164.1	1.47397	0.559712	1.67827e-06	3.82375e-05
ENSMUSG00000054728	Phactr1	872.705	705.749	1039.66	1.47313	0.558888	2.56481e-06	5.6147e-05
ENSMUSG00000037108	Zcwpw1	392.66	317.542	467.778	1.47312	0.558877	0.0011485	0.0117108
ENSMUSG00000032012	Pvrl1	531.38	429.758	633.002	1.47293	0.558688	4.41357e-05	0.000718483
ENSMUSG00000024665	Fads2	1035.05	837.153	1232.94	1.47277	0.558537	3.77056e-05	0.000623342
ENSMUSG00000058672	Tubb2a	6763.29	5470.58	8056	1.4726	0.558369	5.93833e-06	0.000119682
ENSMUSG00000027778	Ift80	1479.71	1197.32	1762.1	1.47171	0.55749	1.20845e-05	0.000226214
ENSMUSG00000034317	Trim59	3004.28	2431.31	3577.24	1.47132	0.557113	1.01526e-07	2.9858e-06
ENSMUSG00000029177	Cenpa	5714.76	4628.27	6801.25	1.4695	0.555326	5.61391e-07	1.40669e-05
ENSMUSG00000022369	Mtbp	1386.26	1123	1649.53	1.46886	0.554701	2.22075e-05	0.000390221
ENSMUSG00000039914	Coq10a	4246.63	3440.29	5052.98	1.46877	0.554607	3.55926e-07	9.3372e-06
ENSMUSG00000030351	Tspan11	183.589	148.762	218.417	1.46823	0.55408	0.00455916	0.0362405
ENSMUSG00000027752	Exosc8	2101.95	1703.6	2500.31	1.46766	0.55352	1.72742e-06	3.92772e-05
ENSMUSG00000026304	Rab17	419.816	340.26	499.371	1.46762	0.553475	3.89656e-05	0.000643695
ENSMUSG00000085022	Gm5860	884.72	717.172	1052.27	1.46725	0.553112	1.62353e-05	0.000294542
ENSMUSG00000040350	Trim7	481.391	390.453	572.329	1.46581	0.551697	0.00023347	0.00304748
ENSMUSG00000033420	Antxr1	3958.38	3211.67	4705.09	1.465	0.550899	1.17333e-07	3.40145e-06
ENSMUSG00000010064	Slc38a3	1019.72	827.488	1211.96	1.46462	0.550531	8.92162e-05	0.00131622
ENSMUSG00000027408	Cpxm1	666.517	541.066	791.969	1.46372	0.54964	1.32703e-05	0.000246146
ENSMUSG00000022203	Efs	1125.7	914.22	1337.19	1.46266	0.548591	7.29212e-06	0.000143981
ENSMUSG00000045333	Zfp423	565.512	459.272	671.752	1.46264	0.548579	0.000267598	0.00343345
ENSMUSG00000043541	Casc1	238.011	193.314	282.707	1.46242	0.548362	0.00114381	0.0116736
ENSMUSG00000008348	Ubc	32546.8	26437.6	38656	1.46216	0.548098	8.40842e-06	0.00016385
ENSMUSG00000025792	Slc25a10	2908.23	2363.53	3452.93	1.46092	0.546876	0.00010189	0.00148072
ENSMUSG00000079685	Ulbp1	669.118	544.021	794.214	1.4599	0.545865	7.83467e-05	0.00118269
ENSMUSG00000032271	Nnmt	355.891	289.379	422.404	1.45969	0.545663	0.00032968	0.00409599
ENSMUSG00000005370	Msh6	3414.48	2778.72	4050.24	1.45759	0.543588	5.5543e-06	0.000112858
ENSMUSG00000030607	Acan	605.577	492.962	718.192	1.45689	0.542893	2.18643e-05	0.000384794
ENSMUSG00000025780	Itih5	5763.74	4692.13	6835.36	1.45677	0.542774	6.1241e-09	2.19358e-07
ENSMUSG00000024793	Tnfrsf25	277.63	226.017	329.244	1.45672	0.542726	0.000138045	0.00194788
ENSMUSG00000055148	Klf2	3053.87	2486.51	3621.23	1.45635	0.542356	3.90827e-05	0.000645154
ENSMUSG00000010911	Apip	2173.6	1770.16	2577.05	1.45583	0.54184	8.85391e-06	0.000171158
ENSMUSG00000064326	Siva1	1127.28	918.108	1336.45	1.45566	0.54167	0.000254567	0.00328701
ENSMUSG00000043015	Tmem194b	864.707	704.382	1025.03	1.45522	0.54124	8.85665e-05	0.00131009
ENSMUSG00000016763	Scube1	1006.8	820.559	1193.04	1.45393	0.539962	1.46258e-05	0.000268612
ENSMUSG00000011305	Plin5	4472.63	3645.45	5299.8	1.45381	0.539844	8.56211e-06	0.000166266
ENSMUSG00000041219	Arhgap11a	5414.3	4413.08	6415.52	1.45375	0.539781	3.29752e-06	7.06643e-05
ENSMUSG00000032816	Igdcc4	2391.41	1949.36	2833.45	1.45352	0.539555	4.8641e-07	1.23824e-05
ENSMUSG00000027412	Lpin3	291.421	237.591	345.252	1.45314	0.539172	0.00137892	0.0137101
ENSMUSG00000021763	BC067074	1457.68	1188.62	1726.74	1.45273	0.538769	8.16934e-07	1.98255e-05
ENSMUSG00000086877	A230072C01Rik	276.567	225.576	327.558	1.45209	0.538134	0.00135101	0.0134806
ENSMUSG00000086605	Gm14290	943.135	769.421	1116.85	1.45155	0.53759	2.90243e-05	0.000490713
ENSMUSG00000025358	Cdk2	6797.81	5546.4	8049.22	1.45125	0.537298	2.56237e-06	5.6147e-05
ENSMUSG00000034472	Rasd2	357.355	291.571	423.139	1.45123	0.537281	0.00100833	0.0105412
ENSMUSG00000044921	Rassf9	446.922	364.708	529.136	1.45085	0.536895	0.000409377	0.0049167
ENSMUSG00000022211	Lrrc16b	1182.26	965.161	1399.37	1.44988	0.535933	5.70396e-05	0.000897811
ENSMUSG00000030042	Pole4	3787.17	3091.9	4482.45	1.44974	0.535797	3.07843e-06	6.62233e-05
ENSMUSG00000029158	Yipf7	5411.08	4417.96	6404.19	1.44958	0.535637	5.79999e-07	1.44683e-05
ENSMUSG00000014453	Blk	274.442	224.115	324.769	1.44912	0.535178	0.00677877	0.0495949
ENSMUSG00000026999	Nup35	411.545	336.104	486.986	1.44891	0.534972	0.00019076	0.00256539
ENSMUSG00000033327	Tnxb	10546.1	8613.23	12478.9	1.44881	0.534866	2.72802e-06	5.91981e-05
ENSMUSG00000048148	Nwd1	422.221	344.901	499.541	1.44836	0.534422	0.000716166	0.00793606
ENSMUSG00000027959	Sass6	873.623	713.708	1033.54	1.44812	0.534184	2.82392e-05	0.000480346
ENSMUSG00000021779	Thrb	286.924	234.435	339.414	1.44779	0.533855	0.00304288	0.0263101
ENSMUSG00000068220	Lgals1	15121.8	12355.5	17888	1.44777	0.533837	6.08109e-07	1.51189e-05
ENSMUSG00000074865	Zfp934	549.899	449.341	650.457	1.44758	0.533645	0.000184121	0.00249109
ENSMUSG00000026278	Bok	1139.59	931.461	1347.72	1.44689	0.532951	0.000336544	0.00416737
ENSMUSG00000038668	Lpar1	1413.1	1155.32	1670.87	1.44624	0.532305	2.48789e-06	5.46237e-05
ENSMUSG00000070469	Adamtsl3	966.483	790.225	1142.74	1.4461	0.532163	1.08582e-06	2.56274e-05
ENSMUSG00000066878	Gm10184	1723.72	1409.99	2037.45	1.445	0.531072	5.1663e-06	0.000105594
ENSMUSG00000058441	Panx2	242.095	198.041	286.148	1.44489	0.530962	0.00432874	0.0347777
ENSMUSG00000031951	Tmem231	229.186	187.527	270.846	1.4443	0.530373	0.00553777	0.0423596
ENSMUSG00000034353	Ramp1	3317.82	2714.86	3920.78	1.44419	0.530261	4.49838e-06	9.39656e-05
ENSMUSG00000047330	Kcne4	383.091	313.509	452.674	1.4439	0.529966	0.000303782	0.00382095
ENSMUSG00000058070	Eml1	9880.87	8086.59	11675.1	1.44377	0.529836	2.43316e-06	5.3527e-05
ENSMUSG00000002006	Pdzd4	395.154	323.437	466.872	1.44347	0.529541	0.000528664	0.00612554
ENSMUSG00000029554	Mad1l1	2039.1	1669.07	2409.14	1.4434	0.529475	6.91167e-05	0.00105665
ENSMUSG00000039232	Stx11	225.675	184.762	266.587	1.44287	0.528941	0.00581314	0.0438506
ENSMUSG00000039865	Slc44a3	108.578	88.9164	128.24	1.44225	0.528319	0.00661129	0.0485602
ENSMUSG00000006651	Aplp1	292.749	239.75	345.748	1.44212	0.528191	0.0010233	0.0106828
ENSMUSG00000030243	Recql	1454.03	1191.05	1717.02	1.4416	0.527676	2.98846e-05	0.000504114
ENSMUSG00000061718	Ppp1r1b	2010.11	1646.59	2373.64	1.44155	0.527619	0.00157852	0.0153598
ENSMUSG00000038128	Camk4	173.859	142.429	205.289	1.44134	0.527415	0.00430034	0.0346223
ENSMUSG00000031527	Eri1	2487.73	2038.12	2937.33	1.4412	0.527266	1.03527e-05	0.000196595
ENSMUSG00000026039	Sgol2	1701.51	1394.13	2008.89	1.44097	0.527036	1.12578e-05	0.000212162
ENSMUSG00000051235	Gen1	757.324	620.653	893.996	1.44041	0.52648	6.86908e-05	0.00105158
ENSMUSG00000024381	Bin1	1653.74	1355.41	1952.07	1.44021	0.526276	3.47103e-06	7.42402e-05
ENSMUSG00000010122	Slc47a1	8268.61	6778.02	9759.21	1.43983	0.5259	1.37152e-06	3.17667e-05
ENSMUSG00000027173	Depdc7	330.237	270.715	389.759	1.43974	0.525809	0.00168791	0.0162405
ENSMUSG00000020513	Tubd1	1026.9	841.871	1211.92	1.43956	0.525628	8.1042e-05	0.00121487
ENSMUSG00000048142	Nat8l	405.727	332.696	478.758	1.43903	0.525092	0.000826695	0.00891769
ENSMUSG00000020000	Moxd1	150.466	123.386	177.545	1.43894	0.52501	0.00241424	0.0217584
ENSMUSG00000052821	Cysltr1	184.283	151.131	217.435	1.43872	0.524787	0.00215324	0.0198626
ENSMUSG00000046229	Scand1	802.568	658.362	946.775	1.43808	0.524141	0.00204175	0.0190226
ENSMUSG00000001334	Fndc5	11536.7	9463.79	13609.6	1.43807	0.524137	8.85999e-06	0.000171158
ENSMUSG00000026281	Dtymk	3670.75	3011.29	4330.22	1.438	0.524059	8.42745e-06	0.000163936
ENSMUSG00000026385	Dbi	13313.5	10921.7	15705.2	1.43799	0.524053	2.89234e-06	6.24605e-05
ENSMUSG00000023259	Slc26a6	684.502	561.759	807.244	1.43699	0.523054	0.000236061	0.0030765
ENSMUSG00000020810	Cygb	3350.82	2750.08	3951.57	1.43689	0.52295	7.00433e-06	0.000139035
ENSMUSG00000031683	Lsm6	2760.07	2265.34	3254.8	1.43678	0.522842	1.30848e-05	0.00024331
ENSMUSG00000041112	Elmo1	2279.06	1870.66	2687.45	1.43663	0.522687	8.76226e-06	0.000169686
ENSMUSG00000071414	Gm6736	261.169	214.383	307.956	1.43648	0.522534	0.00673172	0.0492668
ENSMUSG00000066607	6030419C18Rik	721.943	592.818	851.067	1.43563	0.521683	0.000102317	0.00148596
ENSMUSG00000019539	Rcn3	4023.88	3304.4	4743.37	1.43547	0.521521	1.78791e-06	4.06112e-05
ENSMUSG00000028194	Ddah1	1518.39	1246.9	1789.88	1.43546	0.521515	2.28524e-06	5.05718e-05
ENSMUSG00000024736	Tmem132a	3358.68	2758.17	3959.2	1.43544	0.521496	2.45793e-05	0.000424554
ENSMUSG00000021799	Opn4	445.454	365.814	525.095	1.43542	0.521469	0.00110993	0.011406
ENSMUSG00000040794	C1qtnf4	357.086	293.249	420.923	1.43538	0.521433	0.00447933	0.0357307
ENSMUSG00000058833	2810428I15Rik	1715.28	1408.71	2021.84	1.43525	0.521298	9.26304e-05	0.00135852
ENSMUSG00000020826	Nos2	992.201	814.994	1169.41	1.43487	0.520918	4.88032e-05	0.000783059
ENSMUSG00000029725	Ppp1r35	470.244	386.361	554.127	1.43422	0.520266	0.00267342	0.0237208
ENSMUSG00000051278	4930422G04Rik	1360.92	1118.71	1603.14	1.43303	0.519068	0.000142041	0.00199922
ENSMUSG00000029661	Col1a2	70498.2	57952.4	83044.1	1.43297	0.51901	1.48044e-07	4.21918e-06
ENSMUSG00000037892	Pcdh18	2128.39	1749.79	2506.98	1.43273	0.51877	4.55047e-06	9.48312e-05
ENSMUSG00000030074	Gxylt2	235.658	193.744	277.571	1.43267	0.518702	0.00170533	0.0163658
ENSMUSG00000024905	Mtl5	529.892	435.718	624.067	1.43227	0.518304	0.000728122	0.00804525
ENSMUSG00000044934	Zfp367	5842.88	4807.91	6877.86	1.43053	0.516549	4.00312e-06	8.46488e-05
ENSMUSG00000030268	Bcat1	262.991	216.421	309.561	1.43036	0.516382	0.00491947	0.0385131
ENSMUSG00000052504	Epha3	358.457	294.996	421.918	1.43025	0.516267	0.0002043	0.00271481
ENSMUSG00000086741	Gm15816	585.935	482.251	689.62	1.43	0.516019	0.000299977	0.00378374
ENSMUSG00000031595	Pdgfrl	552.63	454.842	650.418	1.42999	0.516002	1.36613e-05	0.00025235
ENSMUSG00000031971	1700054N08Rik	335.619	276.295	394.943	1.42943	0.515435	0.00461009	0.0365131
ENSMUSG00000054435	Gimap4	4912.04	4044.15	5779.94	1.42921	0.515218	6.79554e-07	1.67117e-05
ENSMUSG00000040658	BC048355	512.83	422.279	603.381	1.42887	0.514871	0.00272191	0.0240846
ENSMUSG00000039395	Mreg	1138.89	938.339	1339.45	1.42747	0.513459	1.15301e-05	0.000216927
ENSMUSG00000018362	Kpna2	2313.5	1906.16	2720.84	1.42739	0.513384	6.18593e-06	0.000124448
ENSMUSG00000036086	Zranb3	1174.25	967.64	1380.86	1.42704	0.51303	0.000426232	0.0050728
ENSMUSG00000001642	Akr1b3	3444.28	2838.32	4050.24	1.42699	0.51297	6.98877e-06	0.00013885
ENSMUSG00000003038	Hmgn2	14288.3	11776.4	16800.1	1.42659	0.512574	9.00155e-07	2.16105e-05
ENSMUSG00000052833	Sae1	7877.17	6495.16	9259.18	1.42555	0.51152	6.12654e-06	0.000123364
ENSMUSG00000020212	Mdm1	1294.5	1067.63	1521.37	1.425	0.510963	1.1502e-05	0.00021658
ENSMUSG00000052852	Reep1	5240.16	4322.33	6157.98	1.42469	0.510647	9.59955e-06	0.000183228
ENSMUSG00000041431	Ccnb1	4896.84	4039.72	5753.97	1.42435	0.510303	7.27557e-06	0.000143781
ENSMUSG00000028334	Nans	2837.01	2340.5	3333.52	1.42428	0.510232	3.34249e-05	0.00055545
ENSMUSG00000025213	Kazald1	202.358	167.019	237.698	1.42318	0.509116	0.00188886	0.0178059
ENSMUSG00000031880	Rrad	8688.78	7173.27	10204.3	1.42254	0.508471	8.42445e-06	0.000163936
ENSMUSG00000027859	Ngf	322.305	266.134	378.476	1.42213	0.508052	0.000886356	0.00944727
ENSMUSG00000038994	Hils1	201.485	166.378	236.591	1.42201	0.507933	0.0033034	0.0280632
ENSMUSG00000086587	Gm11837	383.803	316.95	450.657	1.42186	0.507775	9.57988e-05	0.00140075
ENSMUSG00000035172	Plekhh3	2038.42	1683.36	2393.48	1.42184	0.507761	1.97849e-05	0.00035236
ENSMUSG00000027134	Lpcat4	461.002	380.712	541.292	1.42179	0.507707	0.00180927	0.0172008
ENSMUSG00000036639	Nudt1	737.616	609.21	866.022	1.42155	0.507466	0.000174547	0.00237594
ENSMUSG00000053441	Adamts19	3159.81	2610.48	3709.14	1.42087	0.506771	1.36789e-06	3.17155e-05
ENSMUSG00000003849	Nqo1	1207.24	997.741	1416.74	1.41994	0.505833	2.60661e-05	0.000447468
ENSMUSG00000038005	2700029M09Rik	2153.19	1779.73	2526.66	1.41969	0.505571	2.17965e-05	0.000383904
ENSMUSG00000031910	Has3	388.378	321.045	455.71	1.41946	0.505342	0.0029605	0.0257772
ENSMUSG00000052336	Cx3cr1	924.358	764.143	1084.57	1.41933	0.505212	6.00514e-05	0.000939922
ENSMUSG00000016349	Eef1a2	32590.4	26944.7	38236	1.41905	0.504929	7.3953e-06	0.000145761
ENSMUSG00000027384	2310003L22Rik	1859.14	1537.15	2181.13	1.41894	0.504818	6.99159e-05	0.00106814
ENSMUSG00000040387	Klhl32	457.984	378.712	537.257	1.41864	0.504511	0.00145545	0.0143814
ENSMUSG00000085208	4632419I22Rik	5075.57	4198.18	5952.95	1.41798	0.50384	5.68851e-06	0.000115376
ENSMUSG00000041498	Kif14	1404.06	1161.48	1646.65	1.41772	0.50357	4.00983e-05	0.000659482
ENSMUSG00000073674	Gm6644	1220.65	1009.82	1431.49	1.41757	0.503419	5.98083e-05	0.000937429
ENSMUSG00000038225	Ccdc111	793.231	656.236	930.226	1.41752	0.503367	0.000171525	0.00234051
ENSMUSG00000024052	Lpin2	2253.02	1864.1	2641.95	1.41728	0.50312	3.04538e-05	0.000511784
ENSMUSG00000041120	Nbl1	1011.71	837.254	1186.17	1.41674	0.502578	0.000525947	0.00609722
ENSMUSG00000000884	Gnb1l	490.158	405.831	574.484	1.41557	0.501387	0.00131808	0.013211
ENSMUSG00000035934	Pknox2	617.49	511.295	723.684	1.4154	0.501205	0.0002619	0.00337002
ENSMUSG00000020340	Cyfip2	5808.53	4811.64	6805.42	1.41437	0.500155	2.88457e-06	6.2353e-05
ENSMUSG00000070436	Serpinh1	43504.9	36039.2	50970.7	1.41431	0.5001	5.14923e-06	0.000105471
ENSMUSG00000045799	Gm9800	6600.87	5469.37	7732.37	1.41376	0.499535	4.50826e-06	9.40842e-05
ENSMUSG00000051456	Hspb3	1195	990.241	1399.76	1.41356	0.499332	0.000487656	0.00570659
ENSMUSG00000019966	Kitl	10347.7	8576.34	12119	1.41308	0.498842	1.26656e-06	2.95809e-05
ENSMUSG00000026980	Ly75	516.958	428.474	605.441	1.41301	0.498776	0.00109088	0.0112309
ENSMUSG00000035365	4930547N16Rik	1119.45	927.843	1311.05	1.41301	0.498773	0.000102909	0.00149305
ENSMUSG00000061535	C1qtnf7	516.599	428.283	604.915	1.41242	0.498168	9.15879e-05	0.00134676
ENSMUSG00000036106	Prr5	552.15	457.77	646.531	1.41235	0.498094	0.000619253	0.00703656
ENSMUSG00000022177	Haus4	1909.46	1583.14	2235.79	1.41225	0.497991	0.000197996	0.00264677
ENSMUSG00000039254	Pomt1	1880.9	1559.9	2201.91	1.41157	0.497296	0.000119211	0.00170582
ENSMUSG00000035735	Dagla	567.588	470.791	664.385	1.41121	0.496932	0.00142683	0.0141298
ENSMUSG00000015968	Cacna1d	982.491	815	1149.98	1.41102	0.496739	2.68394e-05	0.000459418
ENSMUSG00000023939	Mrpl14	1943.66	1612.63	2274.69	1.41054	0.496251	0.000161683	0.00222523
ENSMUSG00000068740	Celsr2	1408.89	1168.96	1648.81	1.4105	0.496207	0.000308177	0.00386753
ENSMUSG00000060600	Eno3	90027	74710.9	105343	1.41001	0.495705	9.5444e-06	0.000182487
ENSMUSG00000038152	5033430I15Rik	303.807	252.267	355.347	1.40861	0.494275	0.0030823	0.026538
ENSMUSG00000026768	Itga8	2015.01	1673.25	2356.76	1.40849	0.494152	1.16457e-05	0.000218917
ENSMUSG00000034714	Ttyh2	1865.85	1549.42	2182.29	1.40846	0.494114	4.98796e-05	0.000799182
ENSMUSG00000022978	2610039C10Rik	670.883	557.204	784.561	1.40803	0.493679	0.000876805	0.00935887
ENSMUSG00000003779	Kif20a	5029.24	4177.66	5880.82	1.40768	0.493322	2.88187e-05	0.000488715
ENSMUSG00000001911	Nfix	10554.5	8769.15	12339.9	1.4072	0.492823	4.11822e-06	8.65911e-05
ENSMUSG00000028525	Pde4b	8735.53	7259.22	10211.8	1.40674	0.492355	2.3968e-06	5.27793e-05
ENSMUSG00000020834	Dhrs13	689.97	573.448	806.493	1.40639	0.492	0.00127604	0.0128646
ENSMUSG00000067653	Ankrd23	7798.75	6481.89	9115.61	1.40632	0.491926	1.225e-07	3.54204e-06
ENSMUSG00000039883	Lrrc17	1360.21	1130.68	1589.74	1.406	0.4916	6.22415e-05	0.000972159
ENSMUSG00000021572	Cep72	897.179	745.791	1048.57	1.40598	0.491578	0.00102835	0.0107204
ENSMUSG00000038552	Fndc4	702.339	584.067	820.611	1.40499	0.490563	0.000279356	0.00356386
ENSMUSG00000021932	Rnaseh2b	2409.47	2004.1	2814.85	1.40454	0.490102	1.93311e-05	0.000345379
ENSMUSG00000021974	Fgf9	1066.95	887.846	1246.06	1.40346	0.488989	0.000138485	0.00195285
ENSMUSG00000002297	Dbf4	2377.34	1978.57	2776.11	1.40309	0.488607	2.89787e-05	0.000490511
ENSMUSG00000024206	Rfx2	909.557	757.217	1061.9	1.40237	0.487867	0.00155546	0.0151949
ENSMUSG00000027765	P2ry1	518.336	431.53	605.142	1.40232	0.487813	0.000554934	0.00639347
ENSMUSG00000026098	Pms1	518.355	431.628	605.083	1.40186	0.487345	0.0010283	0.0107204
ENSMUSG00000030323	Ift122	3152.94	2626.1	3679.77	1.40123	0.486691	1.89281e-05	0.000338992
ENSMUSG00000024833	Pola2	3273.19	2726.95	3819.43	1.40062	0.48607	0.000146893	0.00205328
ENSMUSG00000022394	L3mbtl2	1814.32	1511.75	2116.9	1.4003	0.485735	0.000270788	0.00347041
ENSMUSG00000030257	Srgap3	474.034	395.208	552.86	1.39891	0.484301	6.63045e-05	0.00102346
ENSMUSG00000048574	Gm5593	636.902	531.33	742.474	1.39739	0.482734	0.000856178	0.00916935
ENSMUSG00000035299	Mid1	3903.7	3257.33	4550.06	1.39687	0.482195	0.000142266	0.00200042
ENSMUSG00000029576	Radil	523.52	436.897	610.143	1.39654	0.481852	0.00174652	0.0167037
ENSMUSG00000003032	Klf4	3096.7	2584.39	3609.01	1.39646	0.481777	0.000216203	0.00284255
ENSMUSG00000034659	Tmem109	9507.88	7935.78	11080	1.39621	0.481512	3.96426e-05	0.00065295
ENSMUSG00000021219	Rgs6	1280.33	1069.24	1491.43	1.39485	0.480106	8.95032e-05	0.00131958
ENSMUSG00000021981	Cab39l	1737.7	1451.24	2024.16	1.39478	0.480033	2.57739e-05	0.000443133
ENSMUSG00000037138	Aff3	565.976	472.754	659.198	1.39438	0.479622	0.000394302	0.00476124
ENSMUSG00000000732	Icosl	475.95	397.718	554.182	1.3934	0.478614	0.00522971	0.040447
ENSMUSG00000022748	2610528E23Rik	1857.49	1552.22	2162.77	1.39334	0.478549	6.45813e-05	0.00100325
ENSMUSG00000030409	Dmpk	19823.2	16569.7	23076.7	1.39271	0.477896	0.000101831	0.00148072
ENSMUSG00000025170	Rab40b	295.204	246.825	343.583	1.39201	0.477171	0.00657442	0.0483213
ENSMUSG00000038059	2010002N04Rik	525.099	439.087	611.112	1.39178	0.476931	0.000163294	0.00224464
ENSMUSG00000033207	Mamdc2	342.606	286.486	398.725	1.39178	0.476929	0.00123514	0.0124866
ENSMUSG00000058145	Adamts17	1009.16	844.137	1174.18	1.39098	0.476106	6.76097e-05	0.00104073
ENSMUSG00000031380	Figf	351.276	293.979	408.572	1.3898	0.474876	0.000650993	0.00734866
ENSMUSG00000090086	AI480526	4342.81	3634.89	5050.73	1.38951	0.474581	2.36091e-05	0.000410013
ENSMUSG00000025648	Pfkfb4	616.824	516.389	717.259	1.38899	0.474035	0.000769074	0.00841389
ENSMUSG00000032452	Clstn2	189.819	158.913	220.725	1.38897	0.474017	0.00518565	0.0402306
ENSMUSG00000027805	Pfn2	3192.07	2673.28	3710.87	1.38813	0.473147	4.36233e-05	0.000710659
ENSMUSG00000037432	Fer1l5	551.326	461.789	640.863	1.38778	0.472783	0.00029617	0.00373994
ENSMUSG00000027331	D2Ertd750e	4835.59	4050.9	5620.27	1.38741	0.472397	3.44264e-05	0.000571244
ENSMUSG00000037977	6430571L13Rik	515.318	431.789	598.846	1.38689	0.471858	0.0053633	0.0413362
ENSMUSG00000001506	Col1a1	73827.9	61868.3	85787.5	1.38661	0.471566	5.05557e-06	0.000103762
ENSMUSG00000023919	Cenpq	1231.58	1032.08	1431.09	1.38661	0.471564	0.000279695	0.00356412
ENSMUSG00000031066	Usp11	3654.21	3062.41	4246.02	1.3865	0.471444	5.46099e-05	0.000862605
ENSMUSG00000022221	Ripk3	989.523	829.292	1149.75	1.38643	0.471372	0.000213791	0.00281582
ENSMUSG00000020935	Dcakd	4785.07	4011.14	5559	1.38589	0.470814	7.5918e-05	0.00115118
ENSMUSG00000082762	Gm12366	746.553	625.84	867.266	1.38576	0.47068	0.00513632	0.0399034
ENSMUSG00000046191	Pcdhb20	345.545	289.724	401.367	1.38535	0.470245	0.00158965	0.0154345
ENSMUSG00000056498	Tmem154	350.364	293.769	406.959	1.3853	0.4702	0.00101023	0.0105562
ENSMUSG00000026828	Galnt5	184.449	154.753	214.145	1.38379	0.468625	0.00620607	0.0461143
ENSMUSG00000042826	Fgf11	959.135	804.778	1113.49	1.3836	0.468428	0.000309977	0.00388357
ENSMUSG00000073000	Gm10451	136.276	114.366	158.187	1.38316	0.467971	0.00610994	0.0455346
ENSMUSG00000024925	Rnaseh2c	915.82	768.872	1062.77	1.38224	0.46701	0.00105728	0.0109557
ENSMUSG00000052105	1110012J17Rik	427.654	359.054	496.255	1.38212	0.46688	0.00256528	0.022953
ENSMUSG00000024871	Doc2g	3880.71	3258.95	4502.47	1.38157	0.466311	7.58191e-05	0.00115046
ENSMUSG00000060860	Ube2s	10091.5	8476.19	11706.7	1.38113	0.465851	6.8016e-05	0.00104548
ENSMUSG00000038482	Tfdp1	5957.81	5004.25	6911.37	1.3811	0.465817	4.00683e-05	0.000659474
ENSMUSG00000020471	Pold2	2930.76	2462.21	3399.31	1.38059	0.465289	0.00152712	0.014977
ENSMUSG00000049580	Tsku	614.597	516.349	712.844	1.38055	0.46524	0.000316032	0.00395501
ENSMUSG00000027499	Pkia	9972.03	8378.76	11565.3	1.38031	0.464993	3.79271e-06	8.05042e-05
ENSMUSG00000078670	Fam174b	10473.9	8800.49	12147.4	1.38031	0.464993	1.02924e-05	0.000195616
ENSMUSG00000025083	Afap1l2	1085.25	911.92	1258.59	1.38015	0.464825	0.000261635	0.00336855
ENSMUSG00000033350	Chst2	610.048	512.727	707.37	1.37962	0.464274	0.000508687	0.00593407
ENSMUSG00000050592	Fam78a	6024.81	5063.76	6985.86	1.37958	0.464228	0.000180579	0.00244762
ENSMUSG00000045658	Pid1	793.706	667.19	920.223	1.37925	0.463886	8.86855e-05	0.00131012
ENSMUSG00000022676	Snai2	859.878	722.907	996.85	1.37895	0.463566	4.64981e-05	0.000750925
ENSMUSG00000035283	Adrb1	2220.66	1867.07	2574.25	1.37876	0.463376	0.000274142	0.00350936
ENSMUSG00000084159	Gm12696	854.273	718.54	990.007	1.3778	0.462369	0.000252882	0.00326904
ENSMUSG00000016637	Ift27	681.255	573.17	789.34	1.37715	0.461683	0.000621263	0.00704885
ENSMUSG00000030621	Me3	2209.8	1859.23	2560.37	1.37711	0.461648	6.87739e-05	0.00105213
ENSMUSG00000061479	Snrpa	3391.14	2853.41	3928.86	1.3769	0.461425	0.000328022	0.00407845
ENSMUSG00000036672	Cenpt	1693.1	1424.84	1961.36	1.37655	0.461054	0.000281017	0.00357688
ENSMUSG00000021699	Pde4d	3186.32	2681.58	3691.06	1.37645	0.460949	0.000103523	0.00150054
ENSMUSG00000030254	Rad18	819.589	689.913	949.264	1.37592	0.460395	0.000311312	0.00389812
ENSMUSG00000011148	Adssl1	11798.8	9932.52	13665.1	1.37579	0.460264	9.52e-05	0.00139529
ENSMUSG00000022769	Sdf2l1	382.788	322.353	443.223	1.37496	0.459389	0.00418457	0.0338998
ENSMUSG00000071547	Nt5dc2	8258.61	6954.97	9562.25	1.37488	0.459306	0.000124237	0.0017732
ENSMUSG00000031230	Fgf16	657.308	553.596	761.02	1.37468	0.459101	0.00122594	0.0124155
ENSMUSG00000044548	Dact1	1160.77	977.741	1343.8	1.37439	0.458793	8.55113e-05	0.00127164
ENSMUSG00000095159		383.258	322.865	443.65	1.37411	0.458493	0.00633536	0.046888
ENSMUSG00000028896	Rcc1	2416.57	2036	2797.14	1.37384	0.458218	0.000357233	0.00438228
ENSMUSG00000027864	Ptgfrn	21180.6	17845.2	24516.1	1.37383	0.458199	5.2473e-05	0.000833564
ENSMUSG00000012017	Scarf2	1745.41	1470.84	2019.98	1.37335	0.457703	5.78989e-05	0.000908777
ENSMUSG00000027160	Ccdc34	2353.79	1984	2723.58	1.37277	0.457091	0.000150456	0.00209784
ENSMUSG00000026826	Nr4a2	392.062	330.508	453.615	1.37248	0.456781	0.000371543	0.00453867
ENSMUSG00000004633	Chn2	276.187	232.842	319.531	1.37231	0.456603	0.00234116	0.0212195
ENSMUSG00000094114		680.087	573.479	786.695	1.37179	0.456064	9.5741e-06	0.000182898
ENSMUSG00000068079	Tcf15	799.79	674.614	924.966	1.3711	0.455339	0.0014759	0.0145513
ENSMUSG00000031149	Praf2	755.146	636.957	873.334	1.3711	0.455336	0.000648139	0.00732687
ENSMUSG00000001542	Ell2	739.421	623.708	855.135	1.37105	0.455282	0.000561064	0.0064508
ENSMUSG00000040195	Tmem194	1806.69	1523.99	2089.4	1.37101	0.455239	7.76739e-05	0.00117462
ENSMUSG00000041515	Irf8	1258.73	1061.94	1455.52	1.37062	0.454832	0.000160184	0.0022128
ENSMUSG00000040128	Pnrc1	3926.89	3313.08	4540.7	1.37054	0.454742	1.47503e-05	0.000270011
ENSMUSG00000024795	Kif20b	2506.89	2115.14	2898.65	1.37043	0.45463	6.66314e-05	0.0010278
ENSMUSG00000032939	Nup93	5258.49	4437.38	6079.6	1.37009	0.45427	0.000191051	0.00256621
ENSMUSG00000064128	Cenpj	1078.11	909.796	1246.42	1.37	0.454176	0.000513086	0.00597291
ENSMUSG00000032431	Crtap	4224.92	3566.09	4883.75	1.3695	0.453647	8.55119e-05	0.00127164
ENSMUSG00000042215	Bag2	5086.44	4293.5	5879.37	1.36937	0.453507	9.21662e-05	0.00135349
ENSMUSG00000041889	Shisa4	1157.15	976.821	1337.47	1.36921	0.453342	0.000542268	0.00626692
ENSMUSG00000002580	1810046J19Rik	1652.33	1394.84	1909.81	1.3692	0.453333	8.51235e-05	0.00126755
ENSMUSG00000030122	Ptms	22482.3	18985.4	25979.1	1.36837	0.452458	8.24369e-05	0.00123412
ENSMUSG00000070730	Fam82a2	1732.36	1463.35	2001.37	1.36766	0.451713	0.000344967	0.00425516
ENSMUSG00000063568	Jazf1	1633.69	1380.01	1887.38	1.36766	0.451705	0.000285742	0.00363082
ENSMUSG00000014074	Rnf168	3344.2	2824.93	3863.48	1.36764	0.451686	0.000180408	0.00244678
ENSMUSG00000031543	Ank1	10597.2	8954.05	12240.4	1.36702	0.451037	2.29649e-05	0.00040132
ENSMUSG00000035237	Lcat	188.307	159.134	217.48	1.36664	0.450637	0.00399889	0.0327037
ENSMUSG00000028607	Cpt2	14379.2	12151.9	16606.5	1.36658	0.45057	2.76341e-05	0.000471129
ENSMUSG00000038351	Sgsm2	2596.71	2194.6	2998.82	1.36646	0.450441	0.000142484	0.00200042
ENSMUSG00000024426	Atat1	2268.56	1917.36	2619.77	1.36635	0.450322	6.72381e-05	0.00103644
ENSMUSG00000017724	Etv4	459.103	388.187	530.019	1.36537	0.449292	0.000828149	0.00892907
ENSMUSG00000020620	Abca8b	1541.2	1303.26	1779.14	1.36514	0.449053	5.67304e-05	0.000894204
ENSMUSG00000001508	Sgca	3830.38	3239.23	4421.53	1.36499	0.448893	6.4888e-05	0.00100646
ENSMUSG00000028078	Dclk2	683.531	578.351	788.711	1.36372	0.447553	0.00080806	0.00874755
ENSMUSG00000022070	6720463M24Rik	2018.45	1708.31	2328.6	1.3631	0.446896	0.000117266	0.00167906
ENSMUSG00000069806	Cacng7	545.507	461.708	629.306	1.36299	0.446779	0.00232463	0.0211125
ENSMUSG00000023942	Slc29a1	7697.79	6515.29	8880.28	1.36299	0.446775	7.93962e-05	0.0011934
ENSMUSG00000004768	Rab23	1530.33	1295.3	1765.37	1.3629	0.446677	5.05956e-05	0.000808915
ENSMUSG00000029521	Chek2	723.365	612.332	834.398	1.36266	0.446421	0.00110886	0.0114003
ENSMUSG00000030272	Camk1	6063.29	5132.73	6993.85	1.3626	0.44636	5.78986e-05	0.000908777
ENSMUSG00000000753	Serpinf1	940.811	796.483	1085.14	1.36241	0.446164	2.66683e-05	0.000457103
ENSMUSG00000021186	Fbln5	2585.57	2189.2	2981.94	1.36212	0.44585	2.39085e-06	5.27001e-05
ENSMUSG00000086369	E330017L17Rik	529.625	448.542	610.707	1.36154	0.445236	0.000634011	0.00717871
ENSMUSG00000073792	Alg6	1041.36	882.044	1200.68	1.36124	0.444925	0.000720604	0.00797337
ENSMUSG00000038602	Slc35f1	388.966	329.487	448.444	1.36104	0.444708	0.000136275	0.00192534
ENSMUSG00000037628	Cdkn3	733.266	621.214	845.318	1.36075	0.444403	0.000685466	0.0076681
ENSMUSG00000046818	Ddit4l	163.004	138.125	187.884	1.36025	0.44387	0.00542938	0.0417448
ENSMUSG00000021256	Vash1	3800.26	3220.3	4380.21	1.36019	0.443803	0.000159714	0.00221038
ENSMUSG00000021377	Dek	11026.9	9348.54	12705.2	1.35906	0.442606	4.50197e-05	0.000730214
ENSMUSG00000037370	Enpp1	496.592	421.097	572.086	1.35856	0.442079	0.000244775	0.0031808
ENSMUSG00000031827	Cotl1	2900.96	2460.17	3341.75	1.35834	0.441843	0.000363133	0.00444733
ENSMUSG00000007877	Tcap	9749.86	8271.95	11227.8	1.35733	0.440772	3.3341e-05	0.000554468
ENSMUSG00000008450	Nutf2	1124.56	954.141	1294.97	1.35721	0.440649	0.000166491	0.00228297
ENSMUSG00000033065	Pfkm	48925.2	41525.3	56325.1	1.3564	0.439786	0.000142415	0.00200042
ENSMUSG00000027326	Casc5	2305.27	1957.75	2652.79	1.35502	0.438318	9.52652e-05	0.00139533
ENSMUSG00000004748	Mtfp1	3328.06	2826.71	3829.42	1.35472	0.437998	0.000644063	0.00728884
ENSMUSG00000014980	Tsen15	1246.53	1058.85	1434.22	1.3545	0.437761	0.000693618	0.00774765
ENSMUSG00000026888	Grb14	11401.5	9685.16	13117.9	1.35443	0.437686	6.84955e-05	0.00105003
ENSMUSG00000000628	Hk2	12757.8	10838.5	14677	1.35415	0.43739	5.77233e-05	0.000907295
ENSMUSG00000024966	Stip1	13874.9	11788.1	15961.7	1.35406	0.437288	0.000350418	0.00431046
ENSMUSG00000039982	Dtx4	1027.09	872.71	1181.48	1.3538	0.437015	0.000339936	0.00420238
ENSMUSG00000039887	Alg14	1463.01	1243.16	1682.86	1.35369	0.436899	0.000401189	0.00482354
ENSMUSG00000049881	2810025M15Rik	4015.2	3412.37	4618.04	1.35332	0.436508	0.000275077	0.00351931
ENSMUSG00000035704	Alg8	1307.03	1110.92	1503.14	1.35306	0.436227	0.000952322	0.0100592
ENSMUSG00000029862	Clcn1	370.89	315.288	426.492	1.35271	0.435848	0.00225422	0.0205985
ENSMUSG00000036992	Nxt1	774.397	658.532	890.261	1.35189	0.434975	0.00117245	0.0119116
ENSMUSG00000025981	Coq10b	2777.49	2362.03	3192.95	1.35179	0.434867	3.40727e-05	0.000565794
ENSMUSG00000020122	Egfr	743.296	632.147	854.445	1.35165	0.434727	0.000680316	0.00762193
ENSMUSG00000055639	Dach1	1705.11	1450.14	1960.08	1.35164	0.434716	0.000335352	0.00415721
ENSMUSG00000026532	Spna1	2157.92	1835.29	2480.55	1.35158	0.43465	3.25653e-05	0.00054278
ENSMUSG00000057722	Lepr	1978.81	1683.1	2274.52	1.35138	0.434438	4.21221e-05	0.000688714
ENSMUSG00000020456	Ogdh	117075	99611.3	134538	1.35063	0.43363	0.000177481	0.00241001
ENSMUSG00000021930	6330409N04Rik	2785.39	2369.95	3200.84	1.35059	0.433594	0.000239496	0.00311401
ENSMUSG00000027777	Schip1	5401.4	4595.81	6206.98	1.35057	0.433572	4.76139e-05	0.000765624
ENSMUSG00000042787	Exog	643.541	547.678	739.404	1.35007	0.433035	0.00250059	0.0224281
ENSMUSG00000052302	Tbc1d30	544.075	463.053	625.098	1.34995	0.432907	0.00217008	0.0199767
ENSMUSG00000038628	Polr3k	2296.28	1954.44	2638.11	1.3498	0.432745	0.000319605	0.00399077
ENSMUSG00000050840	Cdh20	762.982	649.427	876.537	1.34971	0.432648	0.00297139	0.0258211
ENSMUSG00000032024	9030425E11Rik	1481.67	1261.25	1702.1	1.34954	0.432465	1.85751e-05	0.000333204
ENSMUSG00000063428	Ddo	4610.27	3924.46	5296.09	1.34951	0.432433	0.000148058	0.00206699
ENSMUSG00000020629	Adi1	2158.1	1837.13	2479.07	1.34942	0.432344	0.000209072	0.00276508
ENSMUSG00000068394	Cep152	1029.06	876.059	1182.06	1.34929	0.432198	0.00109608	0.011274
ENSMUSG00000018574	Acadvl	49370.4	42036.7	56704.1	1.34892	0.431804	8.86474e-05	0.00131012
ENSMUSG00000045763	Basp1	826.732	703.975	949.49	1.34876	0.431629	0.000966618	0.010191
ENSMUSG00000054091	1810037I17Rik	2831.77	2411.64	3251.91	1.34842	0.431273	0.00017021	0.00232399
ENSMUSG00000027230	Creb3l1	1527.02	1300.47	1753.57	1.34841	0.431258	0.00134155	0.0134101
ENSMUSG00000090084	Srpx	972.104	827.986	1116.22	1.34812	0.430944	0.000893745	0.0095215
ENSMUSG00000041879	Ipo9	12719.2	10834.7	14603.6	1.34786	0.430668	0.000237395	0.00309209
ENSMUSG00000046314	Stxbp6	1468.36	1250.91	1685.81	1.34767	0.430466	0.00176199	0.0168301
ENSMUSG00000050666	E130203B14Rik	2266.51	1931.03	2601.99	1.34746	0.430245	0.000475932	0.00558696
ENSMUSG00000035561	Aldh1b1	19177.2	16339.4	22015	1.34736	0.430135	0.000695665	0.00776276
ENSMUSG00000085069	Gm13111	1089.67	928.447	1250.9	1.3473	0.430073	0.000165792	0.00227479
ENSMUSG00000049866	Arl4c	3759.52	3203.93	4315.11	1.34682	0.429552	0.000124668	0.00177821
ENSMUSG00000030528	Blm	1688.28	1438.86	1937.7	1.3467	0.429426	0.00257668	0.0230211
ENSMUSG00000042745	Id1	2137.78	1821.96	2453.6	1.34668	0.429411	0.000760136	0.00832833
ENSMUSG00000028480	Glipr2	2621.39	2234.4	3008.38	1.34639	0.429097	0.000399231	0.00481036
ENSMUSG00000020898	1500010J02Rik	5241.92	4468.41	6015.43	1.34621	0.428906	0.000380332	0.00462503
ENSMUSG00000087651	1500009L16Rik	458.765	391.128	526.403	1.34586	0.428526	0.00414329	0.0336018
ENSMUSG00000068184	Ndufaf2	1190.56	1015.35	1365.77	1.34512	0.427736	0.002596	0.0231722
ENSMUSG00000062184	Hs6st2	793.534	676.851	910.217	1.34478	0.427373	0.000216503	0.00284483
ENSMUSG00000064090	Vrk2	600.106	511.891	688.321	1.34466	0.427244	0.00421647	0.0340732
ENSMUSG00000024556	Me2	1459.34	1245.05	1673.63	1.34423	0.426776	0.000787654	0.00857519
ENSMUSG00000022774	Ncbp2	4212.73	3594.29	4831.18	1.34413	0.426669	6.83214e-05	0.00104808
ENSMUSG00000044783	Hjurp	16470.7	14052.9	18888.5	1.3441	0.426641	7.39498e-05	0.00112439
ENSMUSG00000039629	Fam40b	35404	30209.8	40598.1	1.34387	0.426397	5.71086e-05	0.000898266
ENSMUSG00000036880	Acaa2	73695.1	62888.5	84501.7	1.34367	0.426184	7.92219e-05	0.00119158
ENSMUSG00000030091	Nup210	2555.73	2181.14	2930.32	1.34348	0.425971	0.00154865	0.0151351
ENSMUSG00000047067	Dusp28	858.622	732.793	984.45	1.34342	0.425911	0.00365789	0.0304158
ENSMUSG00000034324	Tmem132c	60.8001	51.9157	69.6846	1.34227	0.42467	0.00373432	0.0309821
ENSMUSG00000030357	Fkbp4	20515.8	17518.4	23513.2	1.3422	0.424601	0.000331529	0.00411438
ENSMUSG00000023909	Paqr4	1723.08	1471.37	1974.78	1.34214	0.424532	0.000549674	0.00634268
ENSMUSG00000071266	Zfp946	1178.57	1006.52	1350.61	1.34186	0.424239	0.00108765	0.0112028
ENSMUSG00000075307	Kbtbd10	6692.08	5715.88	7668.29	1.34158	0.423931	1.7094e-05	0.000309117
ENSMUSG00000034570	Inpp5j	3434.73	2934.56	3934.9	1.34088	0.423184	0.000750423	0.00824212
ENSMUSG00000053460	Ggcx	2241.8	1915.77	2567.83	1.34037	0.422628	0.000145353	0.00203466
ENSMUSG00000015247	Nipsnap3b	1717.52	1467.79	1967.25	1.34028	0.422534	0.000308853	0.00387384
ENSMUSG00000008393	Carhsp1	6739.18	5760.11	7718.25	1.33995	0.422177	0.000136889	0.0019328
ENSMUSG00000032177	Pde4a	3994.8	3414.8	4574.81	1.3397	0.421914	0.000189055	0.00254706
ENSMUSG00000043518	Rai2	583.401	498.811	667.99	1.33916	0.421333	0.00281908	0.0247836
ENSMUSG00000008690	Ncaph2	8675.96	7418.6	9933.33	1.33898	0.421131	0.000288856	0.00366206
ENSMUSG00000002221	Paxip1	4112.81	3517.12	4708.5	1.33874	0.420872	0.00105057	0.0109063
ENSMUSG00000005481	Ddx39	4728.19	4043.57	5412.82	1.33862	0.42075	0.000855763	0.0091693
ENSMUSG00000004655	Aqp1	10733.1	9180.52	12285.8	1.33824	0.420338	0.00019916	0.00265916
ENSMUSG00000018217	Pmp22	4872.83	4168.41	5577.25	1.33798	0.420058	0.000304874	0.00383253
ENSMUSG00000026547	Tagln2	14991.7	12825.1	17158.2	1.33787	0.419934	7.46586e-05	0.00113439
ENSMUSG00000028453	Fancg	889.496	761.008	1017.98	1.33768	0.419731	0.00163789	0.0158273
ENSMUSG00000052085	Dock8	1412.77	1208.75	1616.8	1.33758	0.419629	0.00236537	0.0213955
ENSMUSG00000024078	Ttc27	1740.45	1489.13	1991.77	1.33754	0.419583	0.000301729	0.00380088
ENSMUSG00000025512	Chid1	2270.29	1942.57	2598.01	1.33741	0.419442	0.000326754	0.00406868
ENSMUSG00000059022	Kcp	1849.9	1583.1	2116.71	1.33707	0.419071	0.00249089	0.022359
ENSMUSG00000059895	Ptp4a3	32427.3	27751.5	37103.1	1.33698	0.418974	0.000174222	0.00237296
ENSMUSG00000080850	Gm12439	555.005	474.983	635.027	1.33695	0.418941	0.00133172	0.0133297
ENSMUSG00000067931	Zfp948	1772.6	1517.53	2027.66	1.33616	0.418088	0.00165005	0.015931
ENSMUSG00000047342	Zfp286	307.04	262.903	351.177	1.33577	0.417668	0.00464309	0.0367224
ENSMUSG00000040599	Mis12	2080.09	1781.15	2379.04	1.33568	0.417571	0.000443952	0.00525292
ENSMUSG00000072647	Adam1a	301.563	258.237	344.889	1.33555	0.417434	0.00637966	0.0471533
ENSMUSG00000039384	Dusp10	1333.7	1142.26	1525.14	1.33519	0.417046	0.000238937	0.00311036
ENSMUSG00000072235	Tuba1a	24196.2	20723.4	27669.1	1.33516	0.417016	0.000318385	0.00397777
ENSMUSG00000013539	D16H22S680E	4063.33	3481.11	4645.55	1.3345	0.416302	0.000771626	0.00843768
ENSMUSG00000026853	Crat	55102.4	47209.1	62995.7	1.3344	0.416189	0.000209997	0.00277566
ENSMUSG00000034771	Tle2	3104.84	2660.19	3549.49	1.3343	0.416082	0.000736102	0.00811273
ENSMUSG00000031398	Plxna3	789.415	676.466	902.365	1.33394	0.415692	0.000317531	0.00397154
ENSMUSG00000006705	Pknox1	2139.41	1833.52	2445.3	1.33367	0.415398	0.000389107	0.00471123
ENSMUSG00000020973	1110034A24Rik	1179.61	1010.98	1348.24	1.3336	0.415322	0.00216219	0.0199287
ENSMUSG00000040282	BC052040	854.889	732.685	977.093	1.33358	0.415303	0.00108257	0.0111608
ENSMUSG00000029122	Evc	890.799	763.612	1017.99	1.33312	0.414807	0.00143637	0.0142117
ENSMUSG00000048388	Fam171b	221.862	190.199	253.524	1.33294	0.414614	0.00355225	0.0297362
ENSMUSG00000081176	H3f3a-ps2	783.545	671.79	895.299	1.33271	0.414359	0.00223433	0.020467
ENSMUSG00000048814	Lonrf2	515.714	442.269	589.158	1.33213	0.41373	0.00593262	0.0444967
ENSMUSG00000025314	Ptprj	991.471	850.278	1132.66	1.33211	0.413714	0.00103081	0.0107392
ENSMUSG00000038539	Atf5	2040.96	1750.47	2331.46	1.33191	0.413497	0.000320135	0.00399516
ENSMUSG00000004939	Nmrk2	3555.1	3049.09	4061.11	1.33191	0.413493	0.00226479	0.0206782
ENSMUSG00000025766	D3Ertd751e	1859.5	1595	2124	1.33166	0.413225	0.000397271	0.0047919
ENSMUSG00000026500	Fam36a	1260.11	1081.24	1438.98	1.33086	0.412363	0.000431812	0.00511741
ENSMUSG00000054966	Ifltd1	441.49	378.891	504.089	1.33043	0.411894	0.00307667	0.0264997
ENSMUSG00000022831	Hcls1	744.133	638.65	849.615	1.33033	0.411783	0.00134379	0.0134205
ENSMUSG00000026833	Olfm1	512.978	440.381	585.574	1.3297	0.411101	0.00420699	0.0340553
ENSMUSG00000061533	4930534B04Rik	2451.33	2104.76	2797.89	1.32931	0.410679	0.000475868	0.00558696
ENSMUSG00000025026	Add3	16801.9	14432.8	19171.1	1.3283	0.409585	0.000374545	0.00456699
ENSMUSG00000030393	Zik1	627.39	539.257	715.522	1.32687	0.408023	0.00230423	0.0209527
ENSMUSG00000045667	Smtnl2	6975.41	5995.73	7955.08	1.32679	0.407941	0.000678479	0.00760898
ENSMUSG00000024526	Cidea	2253.18	1936.92	2569.45	1.32656	0.407694	0.000160472	0.00221539
ENSMUSG00000032306	Mpi	9640.28	8288.53	10992	1.32617	0.407268	0.00162401	0.0157163
ENSMUSG00000026049	1700029F09Rik	1043.6	897.398	1189.8	1.32583	0.406898	0.00251537	0.0225425
ENSMUSG00000030876	Mettl9	7767.55	6680.45	8854.65	1.32546	0.40649	0.000129829	0.00184125
ENSMUSG00000021236	Entpd5	15151.8	13032.1	17271.5	1.32531	0.406325	0.000200243	0.00267195
ENSMUSG00000096472	Cdkn2d	2902.32	2496.59	3308.06	1.32503	0.406029	0.00413358	0.0335353
ENSMUSG00000019806	Aig1	3941.15	3390.27	4492.02	1.32497	0.405965	0.000516512	0.00600369
ENSMUSG00000037325	Bbs7	1148.78	988.247	1309.31	1.32488	0.405865	0.00307647	0.0264997
ENSMUSG00000029851	Fam115c	717.604	617.336	817.871	1.32484	0.405819	0.00282565	0.0248158
ENSMUSG00000050821	Fam131a	965.009	830.6	1099.42	1.32364	0.404514	0.000801219	0.00870167
ENSMUSG00000035372	1810055G02Rik	927.973	798.827	1057.12	1.32334	0.404184	0.00294386	0.0256824
ENSMUSG00000001999	Blvra	1577.23	1357.9	1796.55	1.32304	0.403853	0.00169966	0.0163323
ENSMUSG00000091931	Moap1	712.244	613.297	811.191	1.32267	0.403455	0.000509933	0.00593929
ENSMUSG00000004018	Fancl	1196.57	1030.44	1362.71	1.32245	0.403214	0.00432086	0.0347394
ENSMUSG00000032643	Fhl3	1122.88	967.076	1278.69	1.32223	0.402969	0.00188417	0.0177917
ENSMUSG00000024132	Eci1	16294.8	14037.4	18552.2	1.32163	0.402314	0.000276848	0.0035359
ENSMUSG00000031838	Ifi30	725.298	624.891	825.706	1.32136	0.402024	0.00303582	0.0262795
ENSMUSG00000030116	Mfap5	2632.29	2268.1	2996.48	1.32114	0.401783	0.00237245	0.0214286
ENSMUSG00000032743	D430042O09Rik	4411.23	3802.44	5020.01	1.32021	0.400766	0.000452737	0.0053427
ENSMUSG00000073609	D2hgdh	3978.23	3429.26	4527.2	1.32017	0.400722	0.000851214	0.00912931
ENSMUSG00000039043	2610034B18Rik	2878.94	2481.75	3276.14	1.32009	0.400639	0.000853693	0.0091515
ENSMUSG00000019853	Hebp2	540.923	466.305	615.542	1.32004	0.400582	0.00279915	0.0246509
ENSMUSG00000037364	Srrt	11408.2	9835.93	12980.5	1.3197	0.400213	0.000484056	0.00567041
ENSMUSG00000007050	Lsm2	1885.53	1625.88	2145.19	1.31941	0.39989	0.00187852	0.0177534
ENSMUSG00000027298	Tyro3	1220.94	1052.83	1389.05	1.31935	0.399824	0.00078686	0.00857072
ENSMUSG00000016028	Celsr1	4305.28	3713.47	4897.09	1.31874	0.399156	0.0026558	0.0235929
ENSMUSG00000029153	Ociad2	666.566	575.01	758.122	1.31845	0.398844	0.00426387	0.0344174
ENSMUSG00000005958	Ephb3	2606.26	2248.47	2964.06	1.31825	0.398629	0.0019774	0.0185246
ENSMUSG00000041133	Smc1a	11028.4	9514.47	12542.3	1.31824	0.39861	0.000341658	0.00422134
ENSMUSG00000035310	Lin54	2293.61	1978.91	2608.32	1.31806	0.398415	0.00310919	0.0267283
ENSMUSG00000024127	Prepl	12012.3	10365.5	13659.1	1.31775	0.398075	0.00112275	0.0115044
ENSMUSG00000070425	Trpc2	3253.97	2807.95	3699.98	1.31768	0.398001	0.000913571	0.00970035
ENSMUSG00000014551	Mrps25	2307.15	1991.04	2623.25	1.31753	0.397837	0.00223301	0.0204633
ENSMUSG00000055760	Gemin6	551.994	476.37	627.618	1.3175	0.397805	0.00577837	0.0436418
ENSMUSG00000041959	S100a10	4310.06	3719.73	4900.38	1.3174	0.397696	0.00130492	0.0131194
ENSMUSG00000038400	Pmepa1	4941.77	4264.98	5618.56	1.31737	0.397661	0.000191205	0.00256674
ENSMUSG00000076431	Sox4	22036.3	19018.8	25053.8	1.31732	0.397608	8.77025e-05	0.00129989
ENSMUSG00000032334	Loxl1	5312.75	4587.88	6037.61	1.31599	0.396149	0.000446872	0.00528467
ENSMUSG00000032477	Cdc25a	2351.25	2030.48	2672.01	1.31595	0.396103	0.00312965	0.0268422
ENSMUSG00000028689	Ccdc163	796.567	688.047	905.088	1.31545	0.395551	0.0044122	0.0353213
ENSMUSG00000023938	Aars2	3087.96	2667.84	3508.08	1.31495	0.395007	0.00594003	0.0445373
ENSMUSG00000030726	Pold3	2814.24	2431.42	3197.05	1.31489	0.39494	0.000493373	0.00576746
ENSMUSG00000027067	Ssrp1	11485.4	9925.93	13044.9	1.31422	0.394211	0.000699899	0.00779832
ENSMUSG00000026029	Casp8	1551.95	1341.36	1762.54	1.314	0.393965	0.000539296	0.0062358
ENSMUSG00000039231	Suv39h1	1909.27	1650.32	2168.21	1.31382	0.393765	0.0029484	0.0257019
ENSMUSG00000038497	Tmco3	2402	2076.55	2727.45	1.31345	0.39336	0.000681732	0.00763169
ENSMUSG00000039062	Anpep	2196.63	1899.23	2494.02	1.31317	0.393056	0.000839115	0.00901686
ENSMUSG00000048078	Odz4	1267.92	1096.47	1439.37	1.31273	0.392572	0.000410792	0.00493105
ENSMUSG00000049327	Setd8	10973.8	9490.86	12456.8	1.3125	0.392319	0.000145621	0.00203678
ENSMUSG00000024942	Capn1	2633.46	2277.71	2989.21	1.31237	0.392179	0.000658599	0.00741579
ENSMUSG00000042436	Mfap4	2406.8	2081.78	2731.83	1.31226	0.392049	4.70139e-06	9.7568e-05
ENSMUSG00000030752	Jmjd5	563.769	487.681	639.857	1.31204	0.391813	0.00313826	0.0268865
ENSMUSG00000020571	Pdia6	11924.3	10316.2	13532.4	1.31175	0.391496	0.000287043	0.00364321
ENSMUSG00000058729	Lin9	1402.27	1213.19	1591.34	1.31169	0.391431	0.00152186	0.0149427
ENSMUSG00000070643	Sox13	2653.15	2295.42	3010.87	1.31168	0.391421	0.00253706	0.0227278
ENSMUSG00000039485	Tspyl4	2837.67	2455.29	3220.05	1.31147	0.391189	0.00332069	0.0281566
ENSMUSG00000030035	Wbp1	4895.08	4235.48	5554.69	1.31147	0.391182	0.000733528	0.00809234
ENSMUSG00000025584	Pde8a	2334.69	2020.27	2649.1	1.31126	0.390954	0.00193	0.0181402
ENSMUSG00000002228	Ppm1j	4398.61	3806.44	4990.77	1.31114	0.390821	0.000926685	0.00982834
ENSMUSG00000007589	Tinf2	1700.91	1472.31	1929.52	1.31054	0.390164	0.00257611	0.0230211
ENSMUSG00000038930	Rccd1	927.244	802.754	1051.73	1.31016	0.38974	0.00575732	0.0435206
ENSMUSG00000046603	D9Ertd402e	2142.95	1855.86	2430.04	1.30938	0.388886	0.00304895	0.0263445
ENSMUSG00000022246	Rai14	1935.65	1676.36	2194.94	1.30935	0.38885	0.000406436	0.004884
ENSMUSG00000027597	Ahcy	883.512	765.183	1001.84	1.30928	0.388777	0.00481982	0.0378948
ENSMUSG00000003423	Pih1d1	3031.36	2625.56	3437.15	1.30911	0.388588	0.00127323	0.0128421
ENSMUSG00000056185	Snx32	1402.88	1215.15	1590.6	1.30898	0.388441	0.00293769	0.0256402
ENSMUSG00000016494	Cd34	25587.1	22163.6	29010.6	1.30893	0.388387	0.000270292	0.00346603
ENSMUSG00000056515	Rab31	4222.04	3657.43	4786.66	1.30875	0.388189	0.000612746	0.00698393
ENSMUSG00000024899	Papss2	762.98	661.005	864.955	1.30854	0.387963	0.000372006	0.00453867
ENSMUSG00000051355	Commd1	4756.82	4121.38	5392.26	1.30836	0.387762	0.000451202	0.00533024
ENSMUSG00000031799	Tpm4	25617.4	22195.4	29039.4	1.30835	0.387752	7.91344e-05	0.0011912
ENSMUSG00000028484	Psip1	7664.13	6640.36	8687.91	1.30835	0.387748	0.000659839	0.00741854
ENSMUSG00000038759	Nup205	6242.85	5409.84	7075.87	1.30796	0.387322	0.00112398	0.0115074
ENSMUSG00000025488	Cox8b	11868.9	10285.2	13452.6	1.30796	0.387315	0.000531837	0.00615911
ENSMUSG00000050914	Ankrd37	450.176	390.113	510.239	1.30793	0.387281	0.00305032	0.0263445
ENSMUSG00000029338	Antxr2	19685	17060.7	22309.2	1.30764	0.386967	0.000158545	0.00219692
ENSMUSG00000018830	Myh11	3126.84	2710.33	3543.36	1.30736	0.386653	0.00125384	0.0126579
ENSMUSG00000054793	Cadm4	1673.03	1450.21	1895.86	1.3073	0.386591	0.00106832	0.0110495
ENSMUSG00000028086	Fbxw7	4925.69	4269.91	5581.48	1.30717	0.386443	0.000339004	0.00419551
ENSMUSG00000026434	Nucks1	11918.3	10331.6	13505.1	1.30716	0.386439	0.000266629	0.00342496
ENSMUSG00000036256	Igfbp7	7156.6	6204.36	8108.85	1.30696	0.386215	0.000387704	0.00469679
ENSMUSG00000047832	Cdca4	1878.16	1628.39	2127.94	1.30678	0.386013	0.0014877	0.0146547
ENSMUSG00000024349	Tmem173	799.812	693.5	906.125	1.3066	0.385816	0.00224607	0.0205409
ENSMUSG00000020492	Fam33a	4666.7	4047.61	5285.79	1.3059	0.385049	0.000416262	0.00498867
ENSMUSG00000029059	2810405K02Rik	2167.25	1880.96	2453.54	1.30441	0.383394	0.00316986	0.0271039
ENSMUSG00000059327	Eda	1146.03	994.77	1297.28	1.3041	0.383056	0.000858589	0.00919077
ENSMUSG00000027635	Dsn1	1976.58	1715.7	2237.45	1.3041	0.383054	0.00293064	0.0256171
ENSMUSG00000027394	Ttl	2955.76	2565.83	3345.69	1.30394	0.38288	0.000621281	0.00704885
ENSMUSG00000074867	Zfp808	918.309	797.505	1039.11	1.30296	0.381789	0.00219263	0.0201594
ENSMUSG00000082087	Gm12138	774.357	672.49	876.223	1.30295	0.381784	0.00335719	0.0284229
ENSMUSG00000005803	Sqrdl	678.028	588.965	767.092	1.30244	0.381217	0.00278167	0.0245259
ENSMUSG00000024978	Gpam	7360.39	6394.39	8326.4	1.30214	0.380886	0.000217928	0.00286019
ENSMUSG00000024617	Camk2a	14642.5	12721.5	16563.5	1.30201	0.38074	0.000809616	0.00875882
ENSMUSG00000029314	Agpat9	3238.1	2813.56	3662.64	1.30178	0.380486	4.60914e-05	0.000744895
ENSMUSG00000057278	Snrpg	751.971	653.405	850.537	1.3017	0.380397	0.00206345	0.0191928
ENSMUSG00000046312	AI464131	833.595	724.403	942.787	1.30147	0.380139	0.00599307	0.0448597
ENSMUSG00000022561	Gpaa1	3212.33	2791.9	3632.76	1.30118	0.379817	0.00344976	0.0290417
ENSMUSG00000027330	Cdc25b	3389.65	2946.03	3833.28	1.30117	0.379809	0.00327379	0.0278752
ENSMUSG00000024135	Srbd1	1765.78	1535.06	1996.51	1.30061	0.379189	0.00376251	0.0311582
ENSMUSG00000021318	Gli3	1213.84	1055.33	1372.35	1.3004	0.378954	0.00166494	0.016047
ENSMUSG00000035407	Kank4	594.079	516.665	671.493	1.29967	0.378143	0.00340743	0.028772
ENSMUSG00000027221	Chst1	527.208	458.528	595.888	1.29957	0.378032	0.00405491	0.033053
ENSMUSG00000028018	Gstcd	769.217	669.107	869.327	1.29923	0.377662	0.00585921	0.044094
ENSMUSG00000025795	Rassf3	9644.91	8389.7	10900.1	1.29923	0.377655	0.000230838	0.00301723
ENSMUSG00000049044	Rapgef4	702.389	611.023	793.755	1.29906	0.377468	0.00384595	0.0317316
ENSMUSG00000025920	Stau2	4295.87	3737.44	4854.3	1.29883	0.377216	0.000702226	0.00782036
ENSMUSG00000028601	Echdc2	2334.34	2031.03	2637.65	1.29868	0.377045	0.00157169	0.0153159
ENSMUSG00000033788	Dysf	10757.2	9359.5	12154.9	1.29867	0.377038	0.000596488	0.006816
ENSMUSG00000009281	Rarres2	985.51	857.485	1113.54	1.29861	0.376965	0.00491422	0.0384855
ENSMUSG00000015094	Npdc1	1632.84	1420.79	1844.89	1.2985	0.376843	0.00199785	0.0186836
ENSMUSG00000028937	Acot7	5014.6	4363.66	5665.54	1.29835	0.376676	0.00156388	0.0152572
ENSMUSG00000038886	Man2a2	12285.2	10690.6	13879.9	1.29833	0.376661	0.00092819	0.00983321
ENSMUSG00000027381	Bcl2l11	7097.49	6180.28	8014.69	1.29682	0.374973	0.000909061	0.00966623
ENSMUSG00000026235	Epha4	1784.4	1553.98	2014.82	1.29655	0.374683	0.000157904	0.0021894
ENSMUSG00000034437	Gm9761	441.017	384.121	497.914	1.29624	0.374334	0.00375994	0.0311484
ENSMUSG00000037151	Lrrc20	2602.66	2267.34	2937.97	1.29578	0.373819	0.00305041	0.0263445
ENSMUSG00000076437	2700094K13Rik	2966.12	2584.56	3347.68	1.29526	0.373239	0.00183372	0.0173962
ENSMUSG00000011884	Gltp	1845.31	1607.95	2082.67	1.29523	0.373214	0.00586292	0.044107
ENSMUSG00000019082	Slc25a22	3269.74	2849.33	3690.14	1.29509	0.373054	0.00287668	0.0252045
ENSMUSG00000043415	Otud1	1937.11	1688.06	2186.15	1.29506	0.373022	0.000292078	0.00369872
ENSMUSG00000021124	Vti1b	3337.34	2908.66	3766.01	1.29476	0.37268	0.00107594	0.0110976
ENSMUSG00000020182	Ddc	14086.8	12281.5	15892.1	1.29398	0.371817	0.00158078	0.0153739
ENSMUSG00000060923	Acyp2	1863.08	1624.39	2101.77	1.29388	0.371707	0.000416885	0.00499346
ENSMUSG00000024376	Epb4.1l4a	1745.12	1521.78	1968.46	1.29353	0.371315	0.000981603	0.0103186
ENSMUSG00000020256	Aldh1l2	4279.59	3731.89	4827.29	1.29352	0.371308	0.00061921	0.00703656
ENSMUSG00000031697	Orc6	1912.16	1667.98	2156.35	1.29279	0.370491	0.00199073	0.0186327
ENSMUSG00000060373	Hnrnpc	15697.4	13693.2	17701.5	1.29272	0.370412	0.000374742	0.00456699
ENSMUSG00000021772	Nkiras1	2075.81	1810.89	2340.73	1.29258	0.370256	0.00296272	0.0257865
ENSMUSG00000031283	Chrdl1	152.494	133.038	171.95	1.29248	0.370146	0.00179599	0.0170963
ENSMUSG00000004187	Kifc2	839.674	732.558	946.79	1.29244	0.370101	0.00430816	0.0346497
ENSMUSG00000026837	Col5a1	36156.9	31546.3	40767.4	1.2923	0.369943	0.000829983	0.00893591
ENSMUSG00000034173	2410018M08Rik	2137.6	1865.17	2410.03	1.29212	0.369743	0.00355354	0.0297362
ENSMUSG00000032997	Chpf	3289.25	2870.33	3708.17	1.2919	0.369492	0.00103734	0.0107887
ENSMUSG00000026238	Ptma	20225.7	17654.8	22796.6	1.29124	0.368761	0.000208565	0.00276163
ENSMUSG00000052798	Nup107	2672.83	2333.15	3012.51	1.29117	0.368684	0.00276772	0.0244415
ENSMUSG00000068205	Macrod2	717.197	626.102	808.291	1.29099	0.368478	0.00586607	0.044116
ENSMUSG00000038685	Rtel1	3655.16	3191.21	4119.1	1.29076	0.368224	0.00348404	0.0292718
ENSMUSG00000026880	Stom	7789.73	6801.69	8777.77	1.29053	0.367961	0.00212188	0.0196301
ENSMUSG00000038521	C1s	710.835	620.676	800.994	1.29052	0.36795	0.00302278	0.0261869
ENSMUSG00000024909	Efemp2	2057.11	1796.2	2318.01	1.29051	0.367939	0.0013751	0.0136782
ENSMUSG00000037455	1110021L09Rik	1122.23	980.072	1264.39	1.2901	0.367478	0.00502284	0.0391827
ENSMUSG00000047635	2810006K23Rik	1263.81	1103.81	1423.81	1.2899	0.367264	0.00429643	0.0346053
ENSMUSG00000073591	Pcdhb22	297.96	260.261	335.659	1.2897	0.367041	0.00516983	0.0401358
ENSMUSG00000024208	2900010M23Rik	5021.77	4387.4	5656.13	1.28918	0.366449	0.0014228	0.0140962
ENSMUSG00000031438	Rnf128	6862.79	5996.64	7728.94	1.28888	0.366117	0.000926945	0.00982834
ENSMUSG00000074457	S100a16	4117.53	3598.24	4636.83	1.28864	0.365845	0.00135758	0.013528
ENSMUSG00000038540	Tmc3	540.344	472.201	608.487	1.28862	0.365823	0.00389036	0.0319682
ENSMUSG00000031371	Haus7	1713.59	1497.94	1929.23	1.28792	0.365047	0.00374381	0.0310493
ENSMUSG00000078154	Gm12184	3030.69	2649.48	3411.9	1.28776	0.364866	0.0022882	0.0208409
ENSMUSG00000051041	Olfml1	439.222	383.978	494.466	1.28775	0.36485	0.004285	0.0345523
ENSMUSG00000090523	Gypc	7026.45	6143.73	7909.17	1.28736	0.364411	0.00268797	0.0238314
ENSMUSG00000022053	Ebf2	1288.86	1127.06	1450.67	1.28712	0.364146	0.00186203	0.0176199
ENSMUSG00000044211	Gm7887	975.428	853.119	1097.74	1.28674	0.363716	0.00267444	0.0237208
ENSMUSG00000034616	Ssh3	1197.41	1047.36	1347.46	1.28654	0.363495	0.00351076	0.029455
ENSMUSG00000024012	Mtch1	18155.2	15882.4	20427.9	1.2862	0.363111	0.00184444	0.0174905
ENSMUSG00000057130	Txnl4a	1559.01	1363.88	1754.15	1.28615	0.363054	0.00250012	0.0224281
ENSMUSG00000026605	Cenpf	6950.19	6080.35	7820.02	1.28611	0.363018	0.00103829	0.0107888
ENSMUSG00000010476	Ebf3	2746.13	2402.7	3089.56	1.28587	0.362743	0.00211624	0.019594
ENSMUSG00000028333	Anp32b	10626.5	9298.3	11954.6	1.28568	0.36253	0.00211844	0.0196063
ENSMUSG00000043252	Tmem64	6427.29	5624.17	7230.41	1.2856	0.362437	0.000742404	0.00817413
ENSMUSG00000013033	Lphn1	8367.36	7322.86	9411.87	1.28527	0.362075	0.00169908	0.0163323
ENSMUSG00000022503	Nubp1	1411.8	1235.61	1587.99	1.28519	0.361978	0.00417393	0.0338258
ENSMUSG00000008035	Mid1ip1	1504.11	1316.56	1691.66	1.2849	0.361661	0.00383917	0.031699
ENSMUSG00000004880	Lbr	4542.65	3976.57	5108.73	1.28471	0.36144	0.00111575	0.0114501
ENSMUSG00000021597	Ankrd32	2831.33	2478.58	3184.09	1.28464	0.361369	0.00145848	0.014405
ENSMUSG00000031245	Hmgn5	2733.54	2393.28	3073.8	1.28434	0.361032	0.00206106	0.0191785
ENSMUSG00000029101	Rgs12	6515.76	5704.9	7326.62	1.28427	0.360946	0.00362157	0.0301699
ENSMUSG00000024940	Ltbp3	7983.01	6989.58	8976.43	1.28426	0.360936	0.000823095	0.00888743
ENSMUSG00000028274	Rngtt	2288.68	2004.01	2573.36	1.28411	0.360765	0.00388556	0.0319522
ENSMUSG00000049230	Gm9833	1248.74	1093.51	1403.97	1.28391	0.36054	0.00220978	0.0203087
ENSMUSG00000033287	Kctd17	3160.37	2768.1	3552.64	1.28342	0.359995	0.00386601	0.031815
ENSMUSG00000036862	Dchs1	7565.78	6626.96	8504.6	1.28333	0.359897	0.000784345	0.00854749
ENSMUSG00000021361	Tmem14c	7231.23	6335.35	8127.11	1.28282	0.359319	0.00192909	0.0181393
ENSMUSG00000045136	Tubb2b	8983.96	7870.97	10096.9	1.28281	0.359305	0.00635652	0.0470134
ENSMUSG00000038241	Cep250	4257.16	3730.71	4783.61	1.28223	0.358652	0.00231094	0.0210052
ENSMUSG00000022098	Bmp1	11015.2	9658.37	12372.1	1.28097	0.357234	0.00182059	0.0172931
ENSMUSG00000023915	Tnfrsf21	1187.37	1041.24	1333.49	1.28067	0.3569	0.00394769	0.0323442
ENSMUSG00000022814	Umps	2402.57	2107.29	2697.84	1.28024	0.356415	0.00534527	0.0412258
ENSMUSG00000031016	Wee1	2985.77	2618.94	3352.6	1.28014	0.356298	0.00245129	0.0220567
ENSMUSG00000022314	Rad21	25628.1	22486.6	28769.6	1.27941	0.355481	0.000951854	0.010059
ENSMUSG00000032014	Oaf	2043.38	1793.8	2292.96	1.27827	0.354193	0.00319708	0.0272948
ENSMUSG00000004105	Angptl2	14036.2	12323.2	15749.3	1.27803	0.353918	0.000429038	0.00509534
ENSMUSG00000001493	Meox1	1947.05	1709.42	2184.67	1.27802	0.353912	7.81918e-05	0.00118165
ENSMUSG00000022677	0610037P05Rik	4277.07	3755.28	4798.86	1.2779	0.353771	0.00178952	0.017042
ENSMUSG00000030768	Disp1	1584.34	1391.18	1777.5	1.2777	0.353545	0.00363831	0.0302868
ENSMUSG00000031960	Aars	8812.83	7738.56	9887.09	1.27764	0.353481	0.00521165	0.0403596
ENSMUSG00000044338	Aplnr	11918.2	10465.5	13371	1.27762	0.353457	0.00118602	0.0120385
ENSMUSG00000074971	Fibin	630.251	553.542	706.96	1.27716	0.352936	0.000114362	0.0016438
ENSMUSG00000078941	Taf9	1171.22	1028.82	1313.63	1.27684	0.352574	0.00388843	0.0319641
ENSMUSG00000039304	Tnfsf10	615.233	540.485	689.981	1.2766	0.352302	0.00539391	0.0415149
ENSMUSG00000020674	Pxdn	44484.9	39087.5	49882.4	1.27617	0.351821	0.000824629	0.0088997
ENSMUSG00000026147	Col9a1	120.945	106.279	135.61	1.27599	0.351612	6.40344e-06	0.000128247
ENSMUSG00000033222	Ttf2	2415.03	2122.3	2707.76	1.27586	0.351467	0.00601645	0.0450046
ENSMUSG00000039715	Wdr34	1332.84	1171.42	1494.25	1.2756	0.351171	0.00340478	0.0287604
ENSMUSG00000042694	Obfc1	1906.57	1675.95	2137.19	1.27521	0.350737	0.00452269	0.0360123
ENSMUSG00000056900	Usp13	23693.6	20833.9	26553.3	1.27452	0.349958	0.00172701	0.0165404
ENSMUSG00000030172	Erc1	8937.3	7858.97	10015.6	1.27442	0.34984	0.00216546	0.0199424
ENSMUSG00000055013	Agap1	5627.57	4948.95	6306.19	1.27425	0.349646	0.00384099	0.0317024
ENSMUSG00000046709	Mapk10	1622.11	1426.65	1817.56	1.27401	0.34938	0.00462498	0.0365922
ENSMUSG00000018965	Ywhah	19219.4	16904	21534.7	1.27394	0.349299	0.00198822	0.018617
ENSMUSG00000004980	Hnrnpa2b1	85012.1	74783.8	95240.4	1.27354	0.348849	0.000655279	0.00738467
ENSMUSG00000022111	Uchl3	2024.07	1780.64	2267.5	1.27342	0.348705	0.00281977	0.0247836
ENSMUSG00000028647	Mycbp	1842.4	1621.18	2063.62	1.27291	0.348131	0.00158575	0.0154034
ENSMUSG00000038302	Lace1	3358.18	2955.46	3760.91	1.27253	0.347698	0.00591966	0.0444143
ENSMUSG00000027194	Ttc17	4305.27	3790.3	4820.23	1.27173	0.346791	0.00290173	0.0253942
ENSMUSG00000036565	Ttyh3	11278.7	9930.81	12626.5	1.27145	0.346471	0.0036064	0.0300884
ENSMUSG00000043943	Naalad2	1752.87	1543.75	1961.98	1.27092	0.345872	0.00150597	0.0148216
ENSMUSG00000028843	Sh3bgrl3	1894.61	1668.7	2120.51	1.27075	0.345684	0.00210596	0.019518
ENSMUSG00000004642	Slbp	3315.39	2920.55	3710.23	1.27039	0.345266	0.000870631	0.00929741
ENSMUSG00000002007	Srpk3	7608.51	6702.79	8514.23	1.27025	0.345115	0.00214663	0.0198122
ENSMUSG00000079108	Srp54b	3361.22	2961.5	3760.95	1.26995	0.344766	0.00353929	0.029639
ENSMUSG00000004098	Col5a3	2868.69	2528.51	3208.87	1.26907	0.343774	0.00428676	0.0345523
ENSMUSG00000070348	Ccnd1	12797.6	11280.2	14315	1.26904	0.343742	0.00077796	0.00849033
ENSMUSG00000066357	Wdr6	6238.18	5500.03	6976.33	1.26842	0.343029	0.00199978	0.0186925
ENSMUSG00000006498	Ptbp1	12281.4	10828.4	13734.5	1.26838	0.342989	0.00157498	0.0153387
ENSMUSG00000025817	Nudt5	2999.43	2644.62	3354.23	1.26832	0.342924	0.00221394	0.0203302
ENSMUSG00000057363	Uxs1	1577.79	1391.33	1764.26	1.26804	0.342601	0.00554802	0.0424235
ENSMUSG00000020319	Wdpcp	697.936	615.556	780.316	1.26766	0.342168	0.00351819	0.0294955
ENSMUSG00000024621	Csf1r	2006.98	1770.13	2243.82	1.2676	0.342099	0.00316888	0.0271039
ENSMUSG00000022964	Tmem50b	4609.03	4065.53	5152.52	1.26737	0.341836	0.00409328	0.0332596
ENSMUSG00000008206	Lass4	8679.49	7656.05	9702.92	1.26735	0.341818	0.000669228	0.00751276
ENSMUSG00000037306	Man1c1	3594.46	3170.89	4018.03	1.26716	0.341602	0.00274146	0.0242383
ENSMUSG00000035585	Tsen34	6071.08	5356.02	6786.13	1.26701	0.341429	0.004209	0.0340553
ENSMUSG00000025745	Hadha	143460	126587	160333	1.26659	0.340947	0.00115508	0.0117672
ENSMUSG00000038456	Dennd2a	3161.87	2790.75	3532.98	1.26596	0.340234	0.00201584	0.0188125
ENSMUSG00000000317	Bcl6b	7033.12	6207.63	7858.61	1.26596	0.340233	0.00261921	0.0233142
ENSMUSG00000036832	Lpar3	4077.11	3598.81	4555.42	1.26581	0.340065	0.00453504	0.0360978
ENSMUSG00000008136	Fhl2	96959.3	85596	108323	1.26551	0.339718	0.00202058	0.0188489
ENSMUSG00000061731	Ext1	5375.12	4745.44	6004.8	1.26538	0.339574	0.0035757	0.0298768
ENSMUSG00000032249	Anp32a	16199	14303.1	18094.9	1.2651	0.33925	0.00241103	0.0217541
ENSMUSG00000036995	Asap3	756.707	668.367	845.046	1.26435	0.33839	0.00401585	0.0328304
ENSMUSG00000031934	Panx1	594.126	524.851	663.4	1.26398	0.33797	0.0062238	0.0462307
ENSMUSG00000029163	Emilin1	9618.4	8497.82	10739	1.26373	0.337692	0.00212958	0.0196768
ENSMUSG00000027750	Postn	90802.6	80252.6	101353	1.26292	0.336765	0.000215906	0.00284033
ENSMUSG00000008226	Scrn3	2352.83	2079.86	2625.8	1.26249	0.336269	0.00466247	0.0368366
ENSMUSG00000047747	Rnf150	2643.01	2336.4	2949.62	1.26246	0.336241	0.00347633	0.0292323
ENSMUSG00000059923	Grb2	11624.4	10277.1	12971.8	1.2622	0.335945	0.00211145	0.0195578
ENSMUSG00000069917	Hba-a2	6475.33	5724.85	7225.82	1.26219	0.335924	5.4258e-05	0.000858259
ENSMUSG00000001119	Col6a1	27740.5	24525.7	30955.4	1.26216	0.335895	0.00207327	0.0192761
ENSMUSG00000031628	Casp3	2382.42	2107.33	2657.51	1.26108	0.334661	0.00301295	0.026122
ENSMUSG00000019718	2810055F11Rik	1268.94	1122.46	1415.41	1.26099	0.334555	0.00565616	0.0430735
ENSMUSG00000072772	Grcc10	2856.99	2527.55	3186.43	1.26068	0.334201	0.00530394	0.0409494
ENSMUSG00000035765	Dym	3824.65	3383.7	4265.6	1.26063	0.334146	0.00392041	0.0321614
ENSMUSG00000041757	Plekha6	7495.65	6632.77	8358.53	1.26019	0.333638	0.00404174	0.0329697
ENSMUSG00000037070	Rbmxl1	2249.69	1990.72	2508.67	1.26018	0.333635	0.0055335	0.0423507
ENSMUSG00000020680	Taf15	5964.69	5278.12	6651.26	1.26016	0.333602	0.00558424	0.0426275
ENSMUSG00000001143	Lman2l	3340.06	2955.78	3724.33	1.26002	0.333442	0.00466076	0.0368361
ENSMUSG00000037818	3110057O12Rik	5288.92	4681.12	5896.71	1.25968	0.333056	0.00364706	0.0303483
ENSMUSG00000073542	Cep76	1629.28	1442.97	1815.58	1.25823	0.331392	0.00451294	0.0359475
ENSMUSG00000026123	Plekhb2	8260.8	7316.28	9205.32	1.2582	0.331357	0.00536068	0.0413303
ENSMUSG00000019961	Tmpo	21861.3	19362.1	24360.6	1.25816	0.33132	0.00296886	0.025815
ENSMUSG00000029253	Cenpc1	2612.61	2314.14	2911.08	1.25796	0.331083	0.00192227	0.0180904
ENSMUSG00000070044	Fam149a	629.962	558.033	701.89	1.25779	0.330895	0.00500184	0.0390486
ENSMUSG00000027642	Rpn2	11702.8	10367.5	13038.1	1.25759	0.330663	0.00443936	0.0354752
ENSMUSG00000026860	Sh3glb2	7691.91	6816.22	8567.61	1.25694	0.329921	0.00543219	0.041752
ENSMUSG00000058997	1300010F03Rik	21121.9	18721.2	23522.5	1.25646	0.32937	0.00152229	0.0149427
ENSMUSG00000074227	Spint2	2973.65	2635.69	3311.61	1.25645	0.329351	0.00626901	0.046443
ENSMUSG00000022324	Matn2	4535.21	4019.86	5050.56	1.2564	0.329296	0.00582011	0.0438736
ENSMUSG00000023973	Cnpy3	2130.95	1888.85	2373.06	1.25635	0.329241	0.00299196	0.0259602
ENSMUSG00000013698	Pea15a	15910.4	14103.8	17717	1.25619	0.32905	0.00293579	0.0256402
ENSMUSG00000022610	Mapk12	2414.76	2140.71	2688.81	1.25604	0.328878	0.00602802	0.0450536
ENSMUSG00000018666	Cbx1	7212.88	6394.59	8031.16	1.25593	0.328757	0.000746773	0.00821414
ENSMUSG00000048126	Col6a3	14936.7	13245.6	16627.9	1.25535	0.328095	0.00130542	0.0131194
ENSMUSG00000058254	Tspan7	7226.18	6408.54	8043.83	1.25517	0.327888	0.00444263	0.0354887
ENSMUSG00000030849	Fgfr2	624.224	553.727	694.721	1.25463	0.32726	0.00319685	0.0272948
ENSMUSG00000041261	Car8	2228.3	1977	2479.6	1.25422	0.326793	0.00240147	0.0216782
ENSMUSG00000021262	Evl	4978.59	4417.39	5539.78	1.25409	0.326637	0.00378756	0.0313192
ENSMUSG00000066979	Bub3	5211.14	4624.67	5797.6	1.25362	0.326106	0.00640869	0.0473054
ENSMUSG00000024082	2410091C18Rik	2833.03	2514.28	3151.78	1.25355	0.326021	0.00564282	0.0429866
ENSMUSG00000040430	Pitpnc1	11578.6	10284.1	12873	1.25174	0.323933	0.00195652	0.0183586
ENSMUSG00000031659	Adcy7	936.754	832.527	1040.98	1.25039	0.322375	0.0057078	0.0432751
ENSMUSG00000031239	Itm2a	9043.29	8037.2	10049.4	1.25036	0.32234	0.00124746	0.0125992
ENSMUSG00000022265	Ank	8095.59	7194.97	8996.21	1.25035	0.322328	0.0043233	0.0347466
ENSMUSG00000028149	Rap1gds1	8460.73	7523.08	9398.38	1.24927	0.321088	0.00534503	0.0412258
ENSMUSG00000038412	Higd1a	6541.92	5819.06	7264.79	1.24845	0.320135	0.00311708	0.0267858
ENSMUSG00000067369	Trmt2b	8097.85	7204.29	8991.41	1.24806	0.31969	0.0028087	0.0247154
ENSMUSG00000025823	Pdia4	6676.78	5940.62	7412.94	1.24784	0.319433	0.00205036	0.0190948
ENSMUSG00000055240	Zfp101	973.619	866.308	1080.93	1.24775	0.319323	0.00524792	0.0405589
ENSMUSG00000018322	Tomm34	2964.89	2638.57	3291.2	1.24734	0.318858	0.00528376	0.0408217
ENSMUSG00000022106	Rcbtb2	4642.87	4136.61	5149.13	1.24477	0.31588	0.00372614	0.0309258
ENSMUSG00000052305	Hbb-b1	16617.3	14809	18425.6	1.24422	0.31524	0.000135274	0.0019124
ENSMUSG00000001870	Ltbp1	7260.47	6471.43	8049.51	1.24385	0.314816	0.00185162	0.0175362
ENSMUSG00000033952	Aspm	3505.37	3124.77	3885.97	1.2436	0.314527	0.00306705	0.0264474
ENSMUSG00000032231	Anxa2	18113.6	16147.5	20079.8	1.24352	0.314434	0.00409136	0.0332596
ENSMUSG00000057406	Whsc1	9376.07	8360.12	10392	1.24305	0.313882	0.00407358	0.0331685
ENSMUSG00000030103	Bhlhe40	5003.43	4462.91	5543.96	1.24223	0.312933	0.00300143	0.0260322
ENSMUSG00000025969	Nrp2	8434.93	7528.2	9341.65	1.24089	0.311374	0.00414982	0.0336426
ENSMUSG00000020576	Nbas	2832.63	2528.52	3136.75	1.24055	0.310975	0.00606497	0.0452766
ENSMUSG00000025742	Prps2	4503.93	4021.07	4986.79	1.24016	0.31053	0.00460489	0.0364978
ENSMUSG00000079197	Psme2	2779.11	2481.89	3076.33	1.23951	0.309774	0.00325012	0.0276948
ENSMUSG00000055027	Smyd1	56169.3	50164.6	62174	1.2394	0.30964	0.00502427	0.0391827
ENSMUSG00000082029	H3f3c	2499.23	2232.09	2766.38	1.23937	0.309601	0.00275256	0.0243171
ENSMUSG00000031740	Mmp2	13197.8	11788.8	14606.7	1.23904	0.309218	0.00130981	0.0131517
ENSMUSG00000025359	Pmel	133.537	119.288	147.786	1.2389	0.309058	0.00282325	0.0248044
ENSMUSG00000032047	Acat1	48135.5	43004.7	53266.3	1.23862	0.308729	0.00386602	0.031815
ENSMUSG00000002416	Ndufb2	7416.54	6626.79	8206.3	1.23835	0.308422	0.00681203	0.0497893
ENSMUSG00000014226	Cacybp	6727.24	6011.83	7442.65	1.238	0.308014	0.00436435	0.0349758
ENSMUSG00000054555	Adam12	1406.61	1257.07	1556.16	1.23793	0.307928	0.00533103	0.0411443
ENSMUSG00000006423	C330007P06Rik	2520.15	2252.24	2788.06	1.23791	0.307904	0.00478681	0.037739
ENSMUSG00000043456	Zfp536	674.422	602.76	746.084	1.23778	0.307753	0.00162923	0.0157572
ENSMUSG00000043987	Cep164	2690.62	2405.05	2976.2	1.23748	0.307402	0.00332479	0.02817
ENSMUSG00000029673	Auts2	4236.38	3787.25	4685.51	1.23718	0.307056	0.00618496	0.045988
ENSMUSG00000034349	Smc4	16533	14781	18285	1.23706	0.306917	0.00561893	0.0428581
ENSMUSG00000040711	Sh3pxd2b	4917.41	4397.66	5437.16	1.23638	0.306119	0.00606848	0.0452806
ENSMUSG00000012428	Steap4	2397.52	2144.43	2650.6	1.23604	0.305727	0.00522983	0.040447
ENSMUSG00000032609	Klhdc8b	6200.34	5547.27	6853.41	1.23546	0.305046	0.00588153	0.0441925
ENSMUSG00000031990	Jam3	2258.58	2020.84	2496.32	1.23529	0.304851	0.00573218	0.0434011
ENSMUSG00000062609	Kcnj15	346.438	310.125	382.751	1.23418	0.303556	0.000126929	0.0018047
ENSMUSG00000007039	Ddah2	5867.86	5253.29	6482.42	1.23397	0.303311	0.00666909	0.048906
ENSMUSG00000059970	Hspa2	935.173	837.27	1033.08	1.23386	0.303181	0.00602905	0.0450536
ENSMUSG00000036103	Colec12	1418.71	1270.33	1567.1	1.23362	0.302897	0.00339902	0.0287335
ENSMUSG00000048070	Pirt	6035.93	5404.97	6666.9	1.23348	0.302729	0.00447869	0.0357307
ENSMUSG00000026586	Prrx1	4109.42	3682.71	4536.12	1.23173	0.30069	0.0011107	0.0114087
ENSMUSG00000020695	Mrc2	3767.86	3377.2	4158.53	1.23136	0.300247	0.00490494	0.0384264
ENSMUSG00000027201	Myef2	2911.97	2610.05	3213.88	1.23135	0.300238	0.00566881	0.0431258
ENSMUSG00000058927	Gm10053	20505.3	18390.9	22619.8	1.22995	0.298598	0.00584164	0.0440063
ENSMUSG00000019916	P4ha1	3532.83	3168.56	3897.1	1.22993	0.298573	0.00203829	0.0189983
ENSMUSG00000029701	Rbm28	4874.6	4375.57	5373.64	1.2281	0.296428	0.00496125	0.0387995
ENSMUSG00000004891	Nes	12939.1	11627.5	14250.7	1.22561	0.293496	0.00224572	0.0205409
ENSMUSG00000029675	Eln	19423.2	17464.8	21381.6	1.22427	0.291923	0.00277568	0.0245021
ENSMUSG00000063889	Crem	1328.62	1194.92	1462.32	1.22378	0.291345	0.0057047	0.0432663
ENSMUSG00000034205	Loxl2	12986.2	11683.1	14289.3	1.22308	0.290517	0.00434989	0.034885
ENSMUSG00000042793	Lgr6	1688.18	1519.58	1856.77	1.22189	0.289117	0.00358578	0.0299387
ENSMUSG00000057522	Spop	13676.5	12312.3	15040.7	1.2216	0.288771	0.00570084	0.0432517
ENSMUSG00000026674	Ddr2	3447.49	3103.69	3791.3	1.22154	0.288705	0.00222058	0.0203661
ENSMUSG00000046876	Atxn1	4696.83	4229.34	5164.32	1.22107	0.288144	0.00393705	0.0322688
ENSMUSG00000030245	Golt1b	2649.74	2386.41	2913.06	1.22069	0.287693	0.00581891	0.0438736
ENSMUSG00000026064	Ptp4a1	15306.2	13789.3	16823.2	1.22001	0.286898	0.00410962	0.0333772
ENSMUSG00000025993	Slc40a1	2349.43	2116.62	2582.23	1.21998	0.286854	0.00407502	0.0331685
ENSMUSG00000027940	Tpm3	10133.1	9131.26	11134.9	1.21943	0.286204	0.00361209	0.0301246
ENSMUSG00000028603	Scp2	11120.5	10021.4	12219.6	1.21935	0.286116	0.00480155	0.0378152
ENSMUSG00000025241	Fyco1	29008.9	26222.2	31795.6	1.21254	0.278035	0.00590167	0.044324
ENSMUSG00000034463	Scara3	947.714	857.689	1037.74	1.20992	0.274916	0.000619916	0.00704051
ENSMUSG00000060002	Chpt1	11875.2	10751.6	12998.9	1.20901	0.273826	0.00328417	0.0279317
ENSMUSG00000022883	Robo1	2224.29	2016.15	2432.43	1.20647	0.270793	0.00182131	0.0172931
ENSMUSG00000021094	Dhrs7	5013.97	4546.01	5481.92	1.20587	0.27008	0.00595768	0.0446314
ENSMUSG00000063314	Gm12657	848.63	769.859	927.401	1.20464	0.268599	0.0056653	0.0431138
ENSMUSG00000069919	Hba-a1	9349.96	8486.34	10213.6	1.20353	0.267272	0.00104377	0.0108407
ENSMUSG00000059447	Hadhb	33944.1	30938.3	36949.9	1.19431	0.256177	0.00459403	0.0364282
ENSMUSG00000024330	Col11a2	421.27	385.142	457.398	1.18761	0.248062	0.00305729	0.0263938
ENSMUSG00000019880	Rspo3	81.9664	75.1141	88.8187	1.18245	0.241781	0.00269953	0.0239148
ENSMUSG00000031375	Bgn	21113.9	19441.8	22786.1	1.17202	0.228997	0.00655083	0.0481954
ENSMUSG00000037887	Dusp8	4322.83	4022.14	4623.51	1.14951	0.201024	0.00450131	0.0358676
ENSMUSG00000066687	Zbtb16	1328.12	1398.59	1257.65	0.899227	-0.153243	0.00140799	0.013968
ENSMUSG00000040061	Plcb2	711.921	752.315	671.527	0.892614	-0.163892	0.00172174	0.016502
ENSMUSG00000042429	Adora1	2683.46	2874.24	2492.68	0.86725	-0.20548	0.00647958	0.0477497
ENSMUSG00000070867	Gm12824	7290.54	7840.1	6740.98	0.859808	-0.217913	0.000860222	0.00920059
ENSMUSG00000081228	Gm16089	1347.82	1460.73	1234.91	0.845406	-0.242284	0.00420987	0.0340553
ENSMUSG00000028862	Map3k6	1022.53	1114.41	930.643	0.835099	-0.25998	0.0044959	0.0358373
ENSMUSG00000081051	Gm15427	10451.7	11405.8	9497.57	0.832699	-0.264133	0.00602841	0.0450536
ENSMUSG00000016319	Slc25a5	67767.6	74206.7	61328.5	0.826455	-0.274992	0.00595857	0.0446314
ENSMUSG00000017309	Cd300lg	4929.65	5399.2	4460.11	0.826068	-0.275668	0.00200402	0.0187179
ENSMUSG00000037012	Hk1	39273.3	43068.8	35477.8	0.823748	-0.279725	0.0022528	0.020594
ENSMUSG00000035357	Pdzrn3	9533.91	10459.9	8607.89	0.82294	-0.281141	0.00166638	0.016054
ENSMUSG00000040856	Dlk1	5917.62	6494.02	5341.22	0.822482	-0.281944	0.0054018	0.0415471
ENSMUSG00000038384	Setd1b	5795.97	6376.6	5215.34	0.817888	-0.290025	0.00672763	0.0492529
ENSMUSG00000074918	5430417L22Rik	4687.18	5156.79	4217.56	0.817867	-0.290062	0.00407323	0.0331685
ENSMUSG00000041361	Myzap	22768.3	25057.2	20479.5	0.817313	-0.291039	0.00667041	0.048906
ENSMUSG00000020534	Shmt1	3451.54	3800.78	3102.3	0.816228	-0.292955	0.00427327	0.0344808
ENSMUSG00000003123	Lipe	4169.85	4592.4	3747.3	0.815977	-0.2934	0.00214306	0.0197932
ENSMUSG00000021200	Asb2	40548.5	44658.7	36438.2	0.815927	-0.293487	0.00419683	0.0339867
ENSMUSG00000021196	Pfkp	17265.2	19015.5	15514.9	0.81591	-0.293518	0.00508493	0.0395729
ENSMUSG00000096699	Rps19-ps4	1253.53	1381.21	1125.86	0.815129	-0.2949	0.00481819	0.0378948
ENSMUSG00000059810	Rgs3	6482.78	7144.28	5821.29	0.814817	-0.295451	0.00332364	0.02817
ENSMUSG00000001943	Vsig2	1036.64	1142.76	930.516	0.81427	-0.296421	0.00402949	0.0328938
ENSMUSG00000036181	Hist1h1c	3965.95	4372.01	3559.89	0.814245	-0.296465	0.00188828	0.0178059
ENSMUSG00000039087	Rreb1	11737.7	12943.1	10532.2	0.813733	-0.297373	0.00192687	0.018126
ENSMUSG00000023921	Mut	7457.66	8224.21	6691.11	0.813587	-0.297632	0.00555466	0.0424597
ENSMUSG00000020893	Per1	7145.57	7884.9	6406.24	0.812469	-0.299615	5.21081e-05	0.000829389
ENSMUSG00000057230	Aak1	3705.4	4090.68	3320.11	0.811629	-0.301108	0.00348809	0.0292761
ENSMUSG00000032596	Uba7	2420.98	2672.72	2169.25	0.811628	-0.30111	0.00572042	0.0433561
ENSMUSG00000049709	Nlrp10	4565.99	5041.24	4090.75	0.811457	-0.301414	0.00620055	0.0460886
ENSMUSG00000024780	Cdc37l1	10428	11514.8	9341.15	0.811227	-0.301822	0.00588066	0.0441925
ENSMUSG00000018446	C1qbp	13949.8	15409.9	12489.7	0.810497	-0.303121	0.00164176	0.0158579
ENSMUSG00000050621	Gm9846	15692.8	17343.4	14042.3	0.809661	-0.30461	0.00296752	0.025815
ENSMUSG00000063382	Bcl9l	6606.36	7304.53	5908.19	0.808838	-0.306077	0.000898654	0.00956468
ENSMUSG00000058064	Gm10036	1096.68	1213.85	979.51	0.806942	-0.309463	0.0046069	0.0365008
ENSMUSG00000039684	Gm5422	789.27	873.681	704.859	0.80677	-0.309771	0.00384889	0.0317441
ENSMUSG00000037820	Tgm2	35680.8	39500.7	31860.9	0.806591	-0.31009	0.000542717	0.00626888
ENSMUSG00000038279	Nop2	3377.5	3739.19	3015.81	0.806541	-0.310181	0.00520296	0.0403213
ENSMUSG00000042680	Fam59a	3692.25	4087.76	3296.73	0.806489	-0.310272	0.00642317	0.047381
ENSMUSG00000032911	Cspg4	10684.9	11834.5	9535.35	0.805727	-0.311636	0.0018145	0.0172432
ENSMUSG00000073436	Eme2	1771.32	1962.79	1579.86	0.804905	-0.313109	0.00503733	0.0392708
ENSMUSG00000001247	Lsr	531.953	589.521	474.384	0.804694	-0.313487	0.00574354	0.0434433
ENSMUSG00000020638	Cmpk2	898.364	995.655	801.073	0.804569	-0.313712	0.00272628	0.0241136
ENSMUSG00000033159	1810031K17Rik	3663.26	4060.33	3266.18	0.804412	-0.313993	0.00564218	0.0429866
ENSMUSG00000005087	Cd44	2084.02	2310.16	1857.88	0.804221	-0.314337	0.00497305	0.0388645
ENSMUSG00000035944	Ttc38	1606.53	1780.88	1432.18	0.804197	-0.314379	0.00640625	0.047303
ENSMUSG00000025533	Asl	1014.59	1124.85	904.334	0.803957	-0.31481	0.00289997	0.0253886
ENSMUSG00000020902	Ntn1	25659.7	28455.1	22864.2	0.803519	-0.315596	0.00229488	0.0208932
ENSMUSG00000061816	Myl1	1379.48	1529.91	1229.05	0.803347	-0.315904	0.00230022	0.0209294
ENSMUSG00000006273	Atp6v1b2	13923.3	15449.8	12396.9	0.802397	-0.317612	0.000911259	0.009685
ENSMUSG00000078429	Ctdsp2	25973.7	28825.1	23122.2	0.802155	-0.318047	0.00549257	0.042121
ENSMUSG00000025223	Ldb1	13317	14780	11853.9	0.802022	-0.318287	0.00391832	0.0321614
ENSMUSG00000037646	Vps13b	2881.22	3197.78	2564.65	0.80201	-0.318308	0.00411772	0.0334309
ENSMUSG00000006418	Rnf114	6339.51	7037.26	5641.76	0.801699	-0.318868	0.00601201	0.0449864
ENSMUSG00000039377	Hlx	832.503	924.235	740.772	0.801497	-0.31923	0.00298864	0.0259414
ENSMUSG00000040296	Ddx58	2427.67	2695.58	2159.76	0.801222	-0.319727	0.00595667	0.0446314
ENSMUSG00000024991	Eif3a	35025.3	38891.3	31159.4	0.801191	-0.319781	0.00550556	0.0421854
ENSMUSG00000004317	Clcn5	3372.44	3745.11	2999.78	0.800986	-0.32015	0.00590701	0.0443492
ENSMUSG00000020099	Unc5b	9557.83	10615	8500.69	0.800822	-0.320446	0.00458099	0.03636
ENSMUSG00000080002	Gm5566	406.901	451.936	361.866	0.800701	-0.320664	0.00572933	0.0433942
ENSMUSG00000058655	Eif4b	24929.3	27697.6	22161.1	0.800108	-0.321734	0.00553471	0.0423507
ENSMUSG00000025558	Dock9	5046.73	5607.5	4485.96	0.799992	-0.321942	0.00613631	0.0456719
ENSMUSG00000079243	Xirp1	43251.2	48066.4	38436	0.799644	-0.32257	0.00221098	0.0203114
ENSMUSG00000041328	Pcf11	5473.45	6085.07	4861.83	0.798977	-0.323774	0.00496511	0.0388161
ENSMUSG00000021476	Habp4	8852.53	9842.27	7862.79	0.79888	-0.323949	0.00242772	0.021871
ENSMUSG00000064120	Mocs1	1632.22	1814.98	1449.45	0.798605	-0.324445	0.00441513	0.0353321
ENSMUSG00000001504	Irx2	2222.64	2472.2	1973.07	0.798103	-0.325352	0.00147191	0.0145225
ENSMUSG00000026170	Cyp27a1	944.691	1050.91	838.469	0.797847	-0.325816	0.00310391	0.0266932
ENSMUSG00000022894	Adamts5	2872.64	3195.98	2549.29	0.797655	-0.326163	0.00440019	0.0352504
ENSMUSG00000033577	Myo6	3237.36	3603.04	2871.67	0.797014	-0.327323	0.00574065	0.0434433
ENSMUSG00000037573	Tob1	7659.5	8525.56	6793.45	0.796832	-0.327652	0.00569085	0.0431974
ENSMUSG00000063524	Eno1	29865.3	33244.9	26485.8	0.796686	-0.327918	0.00306474	0.0264377
ENSMUSG00000024101	Wash	2896.6	3224.65	2568.56	0.796538	-0.328184	0.00612523	0.0456046
ENSMUSG00000059751	Gm9000	1374.93	1530.75	1219.11	0.796411	-0.328415	0.00557371	0.0425637
ENSMUSG00000028803	Nipal3	2658.75	2960.78	2356.72	0.795979	-0.329197	0.00588218	0.0441925
ENSMUSG00000046442	Ppm1e	5695.26	6343.37	5047.14	0.795656	-0.329783	0.0018987	0.0178912
ENSMUSG00000022037	Clu	8638.36	9624.57	7652.14	0.795063	-0.330859	0.00553304	0.0423507
ENSMUSG00000020937	Plcd3	5182.43	5774.5	4590.36	0.794936	-0.331089	0.00548294	0.0420697
ENSMUSG00000040729	AK129341	784.221	873.857	694.584	0.794849	-0.331247	0.00549338	0.042121
ENSMUSG00000045180	Shroom2	2393.17	2666.84	2119.51	0.794765	-0.3314	0.00486394	0.0381854
ENSMUSG00000048271	Rbm33	8601.65	9586.84	7616.45	0.794469	-0.331936	0.00428584	0.0345523
ENSMUSG00000026987	Baz2b	5964.11	6647.96	5280.25	0.794266	-0.332306	0.00633808	0.0468925
ENSMUSG00000060739	Nsa2	10362.4	11550.6	9174.2	0.79426	-0.332316	0.00479986	0.0378152
ENSMUSG00000029635	Cdk8	3486.85	3886.75	3086.94	0.794221	-0.332387	0.00547159	0.0419971
ENSMUSG00000024049	Myom1	166865	186041	147689	0.793856	-0.333052	0.00232974	0.0211417
ENSMUSG00000027620	Rbm39	30133.3	33597.1	26669.4	0.7938	-0.333152	0.0047901	0.0377516
ENSMUSG00000022521	Crebbp	5560.86	6200.16	4921.56	0.793779	-0.33319	0.0056371	0.0429723
ENSMUSG00000063179	Pstk	2796.03	3117.75	2474.3	0.793616	-0.333486	0.00492986	0.0385699
ENSMUSG00000037876	Jmjd1c	9494.54	10587.3	8401.84	0.793581	-0.333551	0.00591348	0.0443828
ENSMUSG00000021823	Vcl	20673.5	23055	18292	0.793404	-0.333873	0.00499467	0.0390062
ENSMUSG00000022856	Tmem41a	2187.87	2439.91	1935.82	0.793398	-0.333883	0.00312156	0.0268037
ENSMUSG00000028737	Aldh4a1	2370.31	2644.2	2096.41	0.792835	-0.334908	0.001211	0.0122753
ENSMUSG00000009566	Fpgs	1718.27	1916.85	1519.68	0.7928	-0.334971	0.00270147	0.0239226
ENSMUSG00000020721	Helz	6079.35	6782.11	5376.58	0.792759	-0.335045	0.00598809	0.0448374
ENSMUSG00000051043	Gprc5c	1170.48	1305.81	1035.15	0.792727	-0.335104	0.00482013	0.0378948
ENSMUSG00000021488	Nsd1	18098.2	20194.1	16002.3	0.792425	-0.335653	0.00489966	0.0383985
ENSMUSG00000050243	Gm5446	484.368	540.486	428.25	0.792342	-0.335805	0.00672188	0.0492293
ENSMUSG00000051586	Mical3	21332.2	23804.1	18860.2	0.792309	-0.335864	0.00255708	0.0228888
ENSMUSG00000042202	Slc35e2	3472.55	3875.12	3069.98	0.792228	-0.336012	0.00624228	0.0463232
ENSMUSG00000027086	Fastkd1	5338.91	5958.32	4719.51	0.792088	-0.336268	0.00493017	0.0385699
ENSMUSG00000040584	Abcb1a	1192.49	1331.32	1053.66	0.791442	-0.337444	0.00102059	0.0106595
ENSMUSG00000003526	Prodh	995.961	1112.1	879.826	0.791142	-0.337991	0.000273764	0.00350653
ENSMUSG00000028057	Rit1	4587.36	5123.47	4051.26	0.790726	-0.33875	0.0068173	0.0498115
ENSMUSG00000061024	Rrs1	2418.62	2701.29	2135.96	0.790718	-0.338765	0.000773259	0.00844727
ENSMUSG00000001918	Slc1a5	4202.57	4693.77	3711.38	0.790703	-0.338792	0.00344816	0.0290391
ENSMUSG00000006731	B4galnt1	471.126	526.244	416.008	0.790523	-0.33912	0.0045735	0.0363208
ENSMUSG00000085148	2210403K04Rik	3551.99	3967.88	3136.09	0.79037	-0.3394	0.00314023	0.0268916
ENSMUSG00000043993	2900052L18Rik	447.576	499.998	395.153	0.790309	-0.339511	0.00440404	0.0352686
ENSMUSG00000059159	Gm8129	1493.82	1668.79	1318.84	0.790295	-0.339538	0.00262149	0.0233252
ENSMUSG00000042719	Naa25	3867.71	4321.59	3413.84	0.789951	-0.340165	0.00356054	0.0297835
ENSMUSG00000081400	Gm13680	940.848	1051.34	830.359	0.789811	-0.34042	0.000169855	0.00232056
ENSMUSG00000020640	Itsn2	5237.24	5852.34	4622.13	0.789791	-0.340458	0.00624262	0.0463232
ENSMUSG00000036867	Smad6	1764.66	1972.26	1557.07	0.789484	-0.341018	0.00303815	0.0262895
ENSMUSG00000051351	Zfp46	7360.37	8226.83	6493.91	0.789358	-0.341249	0.00281828	0.0247836
ENSMUSG00000040481	Bptf	10437.6	11667.1	9208.02	0.789231	-0.341481	0.0062926	0.0465986
ENSMUSG00000003226	Ranbp2	11531.6	12890.6	10172.5	0.789146	-0.341637	0.00459448	0.0364282
ENSMUSG00000004221	Ikbkg	5379.5	6013.59	4745.41	0.789114	-0.341694	0.00501482	0.0391363
ENSMUSG00000042323	Pbrm1	13275	14841.9	11708	0.788848	-0.342181	0.00485148	0.0381144
ENSMUSG00000004558	Ndrg2	57507.9	64303	50712.8	0.788653	-0.342537	0.00126541	0.012769
ENSMUSG00000068284	Gm608	4358.18	4874.66	3841.71	0.788098	-0.343554	0.00567876	0.0431583
ENSMUSG00000057982	Zfp809	1264.27	1414.15	1114.38	0.788021	-0.343694	0.00374968	0.0310864
ENSMUSG00000057530	Ece1	12608.9	14107	11110.7	0.787602	-0.344461	0.00122589	0.0124155
ENSMUSG00000047804	Akap10	2662.15	2978.6	2345.7	0.787517	-0.344617	0.00504052	0.039282
ENSMUSG00000002325	Irf9	2884.71	3227.74	2541.69	0.787453	-0.344735	0.00343013	0.0289097
ENSMUSG00000020689	Itgb3	1171.43	1310.84	1032.03	0.787299	-0.345017	0.00387742	0.031897
ENSMUSG00000021831	Ero1l	5219.37	5840.61	4598.12	0.787267	-0.345075	0.00682542	0.0498545
ENSMUSG00000019841	Rev3l	5811.57	6503.45	5119.69	0.787227	-0.345149	0.00681184	0.0497893
ENSMUSG00000022197	Pdzd2	23503.7	26304.4	20703.1	0.787057	-0.345459	0.000192502	0.00258106
ENSMUSG00000039879	Heca	5941.48	6650.98	5231.97	0.786646	-0.346213	0.00569175	0.0431974
ENSMUSG00000030871	Ears2	4469.93	5004.88	3934.98	0.786228	-0.34698	0.00449111	0.0358119
ENSMUSG00000025060	Slk	35699.8	39978.1	31421.5	0.785969	-0.347457	0.00505303	0.0393657
ENSMUSG00000031273	Col4a6	1116.31	1250.19	982.431	0.785828	-0.347715	0.00515385	0.0400256
ENSMUSG00000043279	Trim56	3871.46	4335.82	3407.11	0.785805	-0.347757	0.00376722	0.031184
ENSMUSG00000028464	Tpm2	9394.1	10521.2	8267.03	0.785751	-0.347855	0.00105695	0.0109557
ENSMUSG00000066245	Gm10156	993.935	1113.25	874.618	0.785643	-0.348054	0.000210138	0.00277588
ENSMUSG00000071415	Rpl23	34897.8	39092.5	30703.1	0.785395	-0.34851	0.00362013	0.0301691
ENSMUSG00000066068	Gm13611	2070.33	2319.36	1821.29	0.785254	-0.348768	0.00545304	0.0418979
ENSMUSG00000041697	Cox6a1	20621.8	23103.9	18139.8	0.785141	-0.348977	0.000161061	0.00221952
ENSMUSG00000005362	Crbn	3145.29	3524.18	2766.39	0.784972	-0.349286	0.00293395	0.0256359
ENSMUSG00000020542	Myocd	11408.3	12783	10033.6	0.784917	-0.349389	0.00356641	0.0298215
ENSMUSG00000027598	Itch	6852.81	7678.77	6026.85	0.784872	-0.349471	0.00539654	0.0415208
ENSMUSG00000050071	Bex1	4281.03	4797.05	3765.01	0.784861	-0.349492	0.00568885	0.0431974
ENSMUSG00000004356	Utp20	3402.11	3812.25	2991.97	0.78483	-0.349549	0.00580915	0.0438353
ENSMUSG00000044791	Setd2	9342.07	10468.6	8215.53	0.784777	-0.349645	0.0040733	0.0331685
ENSMUSG00000030264	Thumpd3	2746.13	3077.32	2414.93	0.784753	-0.34969	0.00505673	0.0393808
ENSMUSG00000039219	Arid4b	5132	5751.06	4512.94	0.784715	-0.349759	0.00345858	0.0291049
ENSMUSG00000022800	Fyttd1	15378.3	17237.2	13519.3	0.784313	-0.350498	0.00465528	0.0368059
ENSMUSG00000034377	Tulp4	12080.6	13541.5	10619.7	0.784235	-0.350642	0.00327943	0.0279126
ENSMUSG00000030189	Csda	21024.5	23566.9	18482	0.784233	-0.350645	0.000868209	0.00927598
ENSMUSG00000035049	Rrp12	2507.07	2810.43	2203.71	0.78412	-0.350854	0.000588707	0.00673398
ENSMUSG00000048874	Phf3	7431.42	8330.92	6531.91	0.784056	-0.350971	0.0057796	0.0436418
ENSMUSG00000042515	Mum1l1	2847.97	3192.78	2503.16	0.784006	-0.351064	0.00574359	0.0434433
ENSMUSG00000026349	Ccnt2	11507.9	12902.8	10113	0.783785	-0.35147	0.00360587	0.0300884
ENSMUSG00000023206	Il15ra	2471.75	2771.42	2172.09	0.783746	-0.351541	0.00391476	0.0321451
ENSMUSG00000019960	Dusp6	3470.39	3891.4	3049.38	0.783621	-0.351772	0.00141513	0.0140326
ENSMUSG00000024892	Pcx	1181.11	1324.4	1037.82	0.783615	-0.351783	0.0010657	0.0110276
ENSMUSG00000035173	A630007B06Rik	5105.86	5728.77	4482.94	0.78253	-0.353782	0.00269509	0.023885
ENSMUSG00000037526	Atg14	1421.68	1595.24	1248.12	0.782404	-0.354014	0.00521904	0.0403915
ENSMUSG00000007038	Neu1	2252.6	2527.72	1977.48	0.78232	-0.35417	0.00208375	0.0193413
ENSMUSG00000031765	Mt1	5871.63	6589.24	5154.02	0.782188	-0.354413	6.44985e-05	0.0010032
ENSMUSG00000006589	Aprt	1962.48	2202.9	1722.07	0.78173	-0.355258	0.00123519	0.0124866
ENSMUSG00000059540	Tcea2	1003.07	1126	880.139	0.781653	-0.3554	0.00545751	0.0419111
ENSMUSG00000057841	Rpl32	26285.2	29510	23060.3	0.78144	-0.355793	0.000756753	0.0082994
ENSMUSG00000040451	Sgms1	6360.74	7141.53	5579.95	0.781338	-0.355982	0.00154464	0.0151091
ENSMUSG00000007827	Ankrd26	947.607	1064.19	831.024	0.780898	-0.356795	0.0066539	0.0488251
ENSMUSG00000032372	Plscr2	2089.24	2346.28	1832.2	0.780896	-0.356799	0.0044203	0.0353608
ENSMUSG00000031609	Sap30	1743.06	1957.53	1528.59	0.780876	-0.356835	0.00430774	0.0346497
ENSMUSG00000047126	Cltc	39408.4	44264.7	34552.1	0.780579	-0.357383	0.00348492	0.0292718
ENSMUSG00000003955	Fam162a	9815.46	11027.3	8603.61	0.780209	-0.358068	0.00123833	0.0125126
ENSMUSG00000061755	Bod1l	4624.47	5196.32	4052.62	0.779901	-0.358636	0.00226945	0.0207123
ENSMUSG00000037475	Thoc2	7554.77	8490.12	6619.41	0.77966	-0.359083	0.00344797	0.0290391
ENSMUSG00000039943	Plcb4	8655.01	9727.96	7582.05	0.779408	-0.35955	0.000965331	0.0101822
ENSMUSG00000040795	Iqcc	1430.88	1608.31	1253.45	0.77936	-0.359638	0.0050785	0.0395366
ENSMUSG00000009687	Fxyd5	1892.09	2126.74	1657.44	0.779334	-0.359687	0.00116641	0.0118664
ENSMUSG00000036792	Mbd5	2359.34	2652.04	2066.63	0.779261	-0.359822	0.00487223	0.0382236
ENSMUSG00000046380	Jrk	683.672	768.693	598.652	0.778792	-0.36069	0.00434623	0.0348806
ENSMUSG00000003382	Etv3	3532.82	3972.61	3093.02	0.778587	-0.36107	0.00260073	0.0231959
ENSMUSG00000014361	Mertk	1358.23	1527.4	1189.06	0.778488	-0.361253	0.00243296	0.0219094
ENSMUSG00000038708	Golga4	20609.8	23177.1	18042.5	0.778462	-0.361302	0.00550551	0.0421854
ENSMUSG00000016495	5033414D02Rik	2533.88	2849.79	2217.98	0.778296	-0.361609	0.00162429	0.0157163
ENSMUSG00000067058	Rps15a-ps5	281.02	316.079	245.96	0.77816	-0.361862	0.000736562	0.0081138
ENSMUSG00000020716	Nf1	4739.44	5331.86	4147.01	0.777778	-0.36257	0.00444932	0.0355294
ENSMUSG00000028245	Nsmaf	9655.44	10864.4	8446.51	0.777451	-0.363177	0.00161985	0.0156869
ENSMUSG00000037795	N4bp2	5295.97	5959.84	4632.1	0.777219	-0.363607	0.00654779	0.0481898
ENSMUSG00000025902	Sox17	1525.07	1716.51	1333.62	0.776937	-0.364131	0.000993979	0.0104205
ENSMUSG00000038244	Mical2	43537.5	49005.9	38069	0.776823	-0.364342	0.0013474	0.0134505
ENSMUSG00000061143	Maml3	1259.24	1417.43	1101.05	0.776792	-0.364401	0.00207968	0.0193196
ENSMUSG00000018809	Smyd4	1652.37	1860.03	1444.71	0.776714	-0.364545	0.00254115	0.0227553
ENSMUSG00000042757	Tmem108	1685.62	1897.54	1473.71	0.776639	-0.364684	8.01017e-05	0.00120238
ENSMUSG00000037805	Rpl10a	2356.49	2652.98	2060	0.776484	-0.364973	0.00222032	0.0203661
ENSMUSG00000040118	Cacna2d1	11262.3	12679.9	9844.74	0.776408	-0.365112	0.00153507	0.0150418
ENSMUSG00000026426	Arl8a	3828.86	4310.91	3346.82	0.77636	-0.365201	0.00482289	0.0379031
ENSMUSG00000036264	Fstl4	1210.38	1362.9	1057.86	0.776186	-0.365526	0.00130204	0.0130972
ENSMUSG00000089838	Gm2962	375.305	422.651	327.96	0.775959	-0.365948	7.7479e-06	0.000152307
ENSMUSG00000000804	Usp32	4912.4	5532.71	4292.08	0.775765	-0.366309	0.00219094	0.0201521
ENSMUSG00000015889	Lta4h	12714.6	14320.4	11108.9	0.775739	-0.366357	0.00237078	0.0214272
ENSMUSG00000038623	Tm6sf1	1652.1	1860.8	1443.4	0.775687	-0.366454	0.00111725	0.0114549
ENSMUSG00000031540	Myst3	8547.96	9627.82	7468.11	0.77568	-0.366466	0.00312898	0.0268422
ENSMUSG00000024713	Pcsk5	1232.24	1388.02	1076.46	0.775537	-0.366732	0.00442532	0.0353883
ENSMUSG00000066554	Gm10167	447.097	503.671	390.522	0.775352	-0.367077	0.00147776	0.0145632
ENSMUSG00000028532	Cachd1	2773.88	3125.12	2422.64	0.775214	-0.367333	0.0014891	0.0146621
ENSMUSG00000027665	Pik3ca	8336.64	9395.57	7277.71	0.774589	-0.368497	0.00402026	0.0328544
ENSMUSG00000039004	Bmp6	1188.07	1339.05	1037.09	0.774491	-0.368679	0.00555708	0.0424637
ENSMUSG00000029119	Man2b2	1961.46	2210.83	1712.08	0.774405	-0.36884	0.00321094	0.0274027
ENSMUSG00000056608	Chd9	3479.03	3921.53	3036.53	0.774322	-0.368994	0.00180582	0.0171753
ENSMUSG00000020108	Ddit4	2914.29	3285.3	2543.28	0.774138	-0.369337	0.00010524	0.00152444
ENSMUSG00000018166	Erbb3	2353.56	2653.42	2053.7	0.773983	-0.369626	0.00519999	0.0403213
ENSMUSG00000030826	Bcat2	6215.5	7007.58	5423.41	0.773936	-0.369715	0.000360012	0.00441153
ENSMUSG00000031939	Taf1d	1859.54	2096.75	1622.34	0.77374	-0.37008	0.00338423	0.0286302
ENSMUSG00000023977	Ubr2	17076	19255.7	14896.4	0.77361	-0.370321	0.000342421	0.00422609
ENSMUSG00000025323	Sp4	1630.63	1838.77	1422.49	0.773607	-0.370326	0.00641109	0.0473074
ENSMUSG00000038495	Otud7b	9151.76	10324.4	7979.12	0.772842	-0.371755	0.00319131	0.0272664
ENSMUSG00000035248	Zcchc6	5825.08	6571.81	5078.35	0.772748	-0.37193	0.00267316	0.0237208
ENSMUSG00000038733	Wdr26	23543.9	26564	20523.7	0.772611	-0.372185	0.0018868	0.0178021
ENSMUSG00000025272	Tro	2966.85	3347.86	2585.83	0.772385	-0.372607	0.000597193	0.00681776
ENSMUSG00000027955	Fam198b	21109.8	23821	18398.7	0.772374	-0.372629	0.00128477	0.0129351
ENSMUSG00000066632	Pgk1-rs7	2174.68	2453.98	1895.37	0.772366	-0.372644	0.00172944	0.0165544
ENSMUSG00000027615	Hps3	2737.09	3088.77	2385.42	0.772288	-0.372789	0.00248232	0.0223
ENSMUSG00000026788	Zbtb43	3520.65	3973.24	3068.07	0.772182	-0.372987	0.00520418	0.0403213
ENSMUSG00000002222	Rmnd5a	11055.7	12478.3	9633.08	0.771986	-0.373354	0.0036916	0.0306618
ENSMUSG00000058006	Mdn1	3613.58	4078.68	3148.48	0.771937	-0.373446	0.00402546	0.0328729
ENSMUSG00000001998	Ap4e1	2147.65	2424.09	1871.22	0.771928	-0.373463	0.00435545	0.034917
ENSMUSG00000070733	Fryl	8922.12	10070.9	7773.39	0.77187	-0.37357	0.000829209	0.00893188
ENSMUSG00000041040	Fam117b	2422.08	2734.22	2109.93	0.771676	-0.373932	0.00340323	0.0287583
ENSMUSG00000042363	1110067D22Rik	5564.94	6282.77	4847.12	0.771494	-0.374273	0.000659587	0.00741854
ENSMUSG00000038121	4933403F05Rik	15527.8	17530.9	13524.6	0.771474	-0.374311	0.00143071	0.014162
ENSMUSG00000029290	Zfp326	5310.37	5995.88	4624.87	0.77134	-0.374561	0.000648407	0.00732687
ENSMUSG00000070047	Fat1	16284.2	18387.2	14181.2	0.771258	-0.374715	0.00339395	0.0287015
ENSMUSG00000032902	Slc16a1	25438.3	28727.7	22148.8	0.770991	-0.375214	0.000974672	0.0102565
ENSMUSG00000081087	Rps15a-ps7	3390.09	3829.52	2950.65	0.770502	-0.37613	0.000613149	0.00698496
ENSMUSG00000033486	Catsper2	824.972	931.967	717.977	0.770388	-0.376342	0.00607862	0.0453331
ENSMUSG00000035629	1700021K19Rik	8449.14	9545.79	7352.49	0.770234	-0.376632	0.00116795	0.0118751
ENSMUSG00000074553	Gm10713	145.868	164.81	126.927	0.77014	-0.376807	0.00653689	0.0481404
ENSMUSG00000021704	Mtx3	4919.85	5559	4280.71	0.770049	-0.376978	0.000730385	0.00806563
ENSMUSG00000027430	Dtd1	927.306	1047.88	806.73	0.769867	-0.377319	0.00237286	0.0214286
ENSMUSG00000062866	Phactr2	22541.2	25472.3	19610.1	0.76986	-0.377332	0.000801855	0.00870397
ENSMUSG00000010047	Hyal2	3950.27	4463.96	3436.58	0.769849	-0.377352	0.000392876	0.00474658
ENSMUSG00000035840	Lysmd3	2188.2	2472.85	1903.55	0.769781	-0.377479	0.00357038	0.0298435
ENSMUSG00000038371	Sbf2	13667.3	15448	11886.6	0.769459	-0.378083	0.00100435	0.0105094
ENSMUSG00000017707	Serinc3	45389.6	51303.7	39475.6	0.76945	-0.378101	0.0010759	0.0110976
ENSMUSG00000027487	Cdk5rap1	1105.18	1249.19	961.174	0.769435	-0.378129	0.00209831	0.0194635
ENSMUSG00000057561	Eif1a	3866.1	4370	3362.21	0.769385	-0.378222	0.00428893	0.0345572
ENSMUSG00000033458	Fan1	848.508	959.131	737.884	0.769325	-0.378335	0.00455785	0.0362405
ENSMUSG00000039997	Ifi203	2389.99	2701.89	2078.1	0.76913	-0.378701	0.00227865	0.0207708
ENSMUSG00000045382	Cxcr4	615.31	695.639	534.981	0.769049	-0.378852	0.00520455	0.0403213
ENSMUSG00000039361	Picalm	29470.1	33318	25622.1	0.769017	-0.378913	0.00347141	0.0292019
ENSMUSG00000035000	Dpp4	1644.58	1859.53	1429.63	0.76881	-0.379301	0.00068187	0.00763169
ENSMUSG00000050332	Fam123b	2452.44	2773.14	2131.74	0.768711	-0.379486	0.00274457	0.0242562
ENSMUSG00000047123	Ticam1	2086.13	2359.38	1812.89	0.768373	-0.380122	0.0026148	0.0232842
ENSMUSG00000026222	Sp100	1689.47	1910.81	1468.13	0.768332	-0.380199	0.00313287	0.0268595
ENSMUSG00000062312	Erbb2	6606.23	7471.93	5740.53	0.768279	-0.380297	0.000586613	0.00671346
ENSMUSG00000081049	Rps24-ps3	5971.73	6754.31	5189.15	0.768272	-0.380311	0.000525187	0.00609157
ENSMUSG00000060376	Bckdha	6193.58	7005.69	5381.48	0.768158	-0.380525	0.000628651	0.00712163
ENSMUSG00000037411	Serpine1	1823.06	2062.14	1583.98	0.768125	-0.380588	0.00385726	0.0317663
ENSMUSG00000069601	Ank3	10390.4	11754.3	9026.46	0.767926	-0.380961	0.00042474	0.00506312
ENSMUSG00000039376	Synpo2l	58123.4	65762.2	50484.7	0.767684	-0.381415	0.00392107	0.0321614
ENSMUSG00000025492	Ifitm3	3584.9	4056.7	3113.11	0.767398	-0.381952	0.00158154	0.0153739
ENSMUSG00000032827	Ppp1r9a	8084.48	9148.58	7020.37	0.767372	-0.382002	0.00235913	0.0213478
ENSMUSG00000042659	Arrdc4	2870.71	3248.6	2492.81	0.767347	-0.382049	0.000990787	0.0103943
ENSMUSG00000019699	Akt3	4296.52	4862.15	3730.88	0.767331	-0.382079	0.00248133	0.0223
ENSMUSG00000041134	Cyyr1	5150.38	5828.59	4472.17	0.767283	-0.38217	0.000715206	0.00792935
ENSMUSG00000021709	Erbb2ip	13821.2	15643.2	11999.2	0.767057	-0.382593	0.002082	0.0193331
ENSMUSG00000029068	Ccnl2	20394.9	23083.6	17706.1	0.767041	-0.382625	0.000991022	0.0103943
ENSMUSG00000031327	Chic1	533.774	604.148	463.399	0.767028	-0.382649	0.00606956	0.0452806
ENSMUSG00000062627	Mysm1	2950.4	3339.76	2561.04	0.766833	-0.383015	0.00485421	0.0381224
ENSMUSG00000033004	Mycbp2	7426.7	8407.91	6445.49	0.766598	-0.383458	0.000759656	0.00832716
ENSMUSG00000075514	Gm13375	1013.66	1147.6	879.723	0.766576	-0.3835	0.0016547	0.015969
ENSMUSG00000040540	Gm9770	1876.26	2124.24	1628.28	0.766523	-0.3836	0.0032905	0.0279642
ENSMUSG00000021392	Nol8	2303.71	2608.26	1999.16	0.76647	-0.383699	0.00232734	0.0211285
ENSMUSG00000036550	Cnot1	21096.4	23886.4	18306.4	0.766395	-0.383841	0.00103732	0.0107887
ENSMUSG00000067851	Arfgef1	8227.3	9315.65	7138.95	0.766339	-0.383946	0.00136636	0.0136034
ENSMUSG00000047789	Slc38a9	2000.97	2265.69	1736.25	0.766322	-0.383978	0.00670672	0.0491481
ENSMUSG00000022505	Emp2	9444.84	10695.1	8194.57	0.766198	-0.384211	0.000221142	0.00289898
ENSMUSG00000036391	Sec24a	3186.31	3608.73	2763.9	0.765892	-0.384788	0.00353382	0.0296155
ENSMUSG00000041415	Dicer1	9226.91	10450.5	8003.33	0.765833	-0.384898	0.00103111	0.0107392
ENSMUSG00000026812	Tsc1	5802.76	6573.12	5032.39	0.7656	-0.385336	0.000974536	0.0102565
ENSMUSG00000031451	Gas6	22130.7	25075.9	19185.5	0.765099	-0.386282	0.000372012	0.00453867
ENSMUSG00000019789	Hey2	8854.23	10033.3	7675.2	0.764975	-0.386515	0.00042545	0.00506889
ENSMUSG00000086918	4930429F24Rik	2348.47	2661.48	2035.46	0.764785	-0.386874	0.00257461	0.0230211
ENSMUSG00000006127	Inpp5k	4711.61	5339.73	4083.48	0.764735	-0.386967	0.00107356	0.0110883
ENSMUSG00000042579	4632404H12Rik	669.292	758.556	580.028	0.764648	-0.387132	0.00212457	0.0196468
ENSMUSG00000020580	Rock2	20325.1	23038.9	17611.3	0.764417	-0.387569	0.000696342	0.00776644
ENSMUSG00000052934	Fbxo31	3160.41	3582.64	2738.18	0.764291	-0.387806	7.93757e-06	0.000155489
ENSMUSG00000024395	Lims2	2270.18	2573.99	1966.37	0.76394	-0.388468	0.00020356	0.0027082
ENSMUSG00000052675	Zfp112	603.936	684.772	523.099	0.763903	-0.388538	0.00498382	0.0389351
ENSMUSG00000029108	Pcdh7	11508.5	13050.6	9966.35	0.763672	-0.388975	3.7399e-05	0.000618731
ENSMUSG00000056492	Gpr116	20954.3	23767.6	18141	0.763266	-0.389743	0.000583187	0.00667767
ENSMUSG00000035614	Fam179b	3027.28	3433.73	2620.82	0.763259	-0.389756	0.00624662	0.0463232
ENSMUSG00000067344	Rps25-ps1	3507.95	3979.25	3036.64	0.763118	-0.390023	0.000109383	0.00157935
ENSMUSG00000025911	Adhfe1	7556.99	8572.48	6541.5	0.763081	-0.390093	0.000205171	0.00272315
ENSMUSG00000037890	Wdr19	685.843	778.039	593.648	0.763006	-0.390234	0.00323974	0.0276274
ENSMUSG00000021069	Pygl	4826.51	5476.16	4176.87	0.762737	-0.390742	0.000421783	0.00503325
ENSMUSG00000022553	Maf1	6491.15	7365.21	5617.08	0.762651	-0.390905	0.0015439	0.0151084
ENSMUSG00000028053	Ash1l	12289.2	13945.8	10632.6	0.762423	-0.391337	0.00115735	0.0117849
ENSMUSG00000041570	Camsap2	6126.21	6952.84	5299.59	0.76222	-0.391722	0.00139763	0.0138837
ENSMUSG00000054690	Emcn	4931.45	5597.82	4265.07	0.761916	-0.392296	0.000845248	0.00907404
ENSMUSG00000072969	Armcx5	1696.92	1926.31	1467.52	0.76183	-0.392459	0.0013552	0.0135102
ENSMUSG00000039096	Rsad1	2981.28	3384.59	2577.97	0.761678	-0.392747	0.000125931	0.00179394
ENSMUSG00000023092	Fhl1	21985	24963	19007	0.761409	-0.393256	0.000796918	0.0086676
ENSMUSG00000034656	Cacna1a	1210.64	1374.63	1046.65	0.761405	-0.393264	0.00129382	0.0130203
ENSMUSG00000033943	Mga	7443.15	8451.82	6434.48	0.761312	-0.39344	0.00169751	0.0163257
ENSMUSG00000024048	Myl12a	37121.6	42152.3	32090.8	0.761307	-0.39345	0.000661727	0.00743603
ENSMUSG00000060143	Gm10076	989.691	1123.82	855.561	0.761296	-0.393471	8.96562e-06	0.000172751
ENSMUSG00000037533	Rapgef6	4871.54	5532.25	4210.84	0.761144	-0.393759	0.00151912	0.0149248
ENSMUSG00000031010	Usp9x	19998.3	22711.6	17285	0.761066	-0.393906	0.00194022	0.0182209
ENSMUSG00000054702	Ap1s3	1001.59	1138.02	865.155	0.760227	-0.395498	0.00226213	0.0206624
ENSMUSG00000013736	Trnt1	3631.8	4127.39	3136.2	0.75985	-0.396213	0.000976418	0.0102701
ENSMUSG00000020205	Phlda1	1886.81	2144.43	1629.18	0.759725	-0.396451	0.00261276	0.0232842
ENSMUSG00000032238	Rora	2019.37	2295.56	1743.18	0.759371	-0.397124	0.00171316	0.0164268
ENSMUSG00000024477	Pggt1b	1788.97	2033.86	1544.08	0.759189	-0.397468	0.00443127	0.0354232
ENSMUSG00000046879	Irgm1	1941.22	2206.95	1675.48	0.759182	-0.397482	0.00032458	0.00404612
ENSMUSG00000086688	Gm11560	538.801	612.622	464.981	0.759001	-0.397826	0.000452049	0.00533742
ENSMUSG00000015659	Serac1	2249.84	2558.12	1941.57	0.758982	-0.397863	0.00172723	0.0165404
ENSMUSG00000033237	Arid2	8605.4	9785.34	7425.46	0.758835	-0.398143	0.0010005	0.0104839
ENSMUSG00000039763	Dnajc28	2158.64	2454.83	1862.45	0.758686	-0.398426	0.00385461	0.0317561
ENSMUSG00000005893	Nr2c2	3361.64	3822.92	2900.37	0.758678	-0.398441	0.00324149	0.0276318
ENSMUSG00000024030	Abcg1	1267.56	1441.65	1093.46	0.758474	-0.398828	0.00188393	0.0177917
ENSMUSG00000019820	Utrn	11920.7	13558.5	10282.9	0.758406	-0.398958	0.000457961	0.00539298
ENSMUSG00000044794	9330133O14Rik	663.724	754.957	572.49	0.758309	-0.399142	0.00214689	0.0198122
ENSMUSG00000048279	Sacs	7227.39	8223.28	6231.5	0.757788	-0.400134	0.00377694	0.031243
ENSMUSG00000059049	Frem1	1399.34	1592.23	1206.44	0.75771	-0.400283	0.00303458	0.026279
ENSMUSG00000020303	Stc2	1487.64	1692.87	1282.41	0.757536	-0.400614	0.00108423	0.0111727
ENSMUSG00000010609	Psen2	1435.38	1633.42	1237.34	0.757518	-0.400648	0.000645673	0.00730335
ENSMUSG00000000440	Pparg	626.182	712.627	539.736	0.757389	-0.400893	0.00584951	0.0440507
ENSMUSG00000032253	Phip	6668.71	7589.61	5747.81	0.757327	-0.401012	0.000762847	0.00835395
ENSMUSG00000024294	Mib1	8574.39	9758.5	7390.29	0.757318	-0.401028	0.00100245	0.0104995
ENSMUSG00000022994	Adcy6	48063.1	54705.5	41420.7	0.757158	-0.401333	0.000185293	0.0025009
ENSMUSG00000047250	Ptgs1	2061.28	2346.27	1776.28	0.757065	-0.401511	0.00018153	0.00245902
ENSMUSG00000068396	Rpl34-ps1	3526.71	4015.85	3037.58	0.756397	-0.402785	0.000108141	0.00156444
ENSMUSG00000053332	Gas5	6802.79	7747.2	5858.39	0.756194	-0.403171	0.000558064	0.00642291
ENSMUSG00000082884	Gm13339	28319.7	32251.6	24387.9	0.756177	-0.403204	0.000483283	0.00566432
ENSMUSG00000029787	Avl9	1930.67	2198.91	1662.44	0.756028	-0.403488	0.00351204	0.029455
ENSMUSG00000055041	Commd5	978.08	1113.98	842.179	0.756008	-0.403526	0.0034277	0.0289097
ENSMUSG00000090222	Gm16340	739.204	841.927	636.481	0.755981	-0.403578	0.00421665	0.0340732
ENSMUSG00000039126	Prune2	1379.37	1571.07	1187.68	0.755966	-0.403607	0.000423399	0.00504983
ENSMUSG00000038056	Mll3	6751.74	7690.32	5813.16	0.755906	-0.403721	0.00116833	0.0118751
ENSMUSG00000075590	Nrbp2	9775.62	11134.9	8416.38	0.755858	-0.403814	0.000188615	0.00254266
ENSMUSG00000031994	Adamts8	1098.22	1250.97	945.465	0.755787	-0.403948	0.00626278	0.0464123
ENSMUSG00000028015	Ctso	2046.39	2331.44	1761.35	0.755479	-0.404536	0.000627311	0.00711006
ENSMUSG00000033855	Ston1	2201.35	2508.02	1894.69	0.755452	-0.404588	0.000711529	0.00790427
[truncated: 1,061 more rows]
