# Supplementary material for: Complete cardiac regeneration in a mouse model of myocardial infarction
Source: Aging (Albany NY). 2012 Dec 31;4(12):966–77. doi: 10.18632/aging.100526 (PMC3615162; doi:10.18632/aging.100526)
Supplement: Supplementary file 3 [file aging-04-966-s003.xlsx]

## Sheet: day3vsday10
Transcript ID	MGI gene symbol	Mean expression	Mean expression P3	Mean expression P10	Fold change P10/P3	log2 fold change P10/P3	p value	p value adjusted *
ENSMUSG00000029622	Arpc1b	5609.41	5151.69	6067.12	1.17769	0.235965	0.0117037	0.0499274
ENSMUSG00000080002	Gm5566	307.205	257.698	356.713	1.38423	0.469083	0.0116999	0.0499207
ENSMUSG00000021748	Pdhb	42589.5	39144.8	46034.2	1.176	0.233882	0.0116955	0.0499114
ENSMUSG00000030528	Blm	1238.58	1379.75	1097.41	0.795364	-0.330313	0.0116911	0.0499021
ENSMUSG00000094179		36.3693	47.3938	25.3448	0.534771	-0.903008	0.0116853	0.049887
ENSMUSG00000054934	Kcnmb4	65.7382	48.3675	83.1088	1.71828	0.780963	0.0116721	0.0498402
ENSMUSG00000080773	Gm12955	2.67395	5.34791	0	0	#NAME?	0.0116623	0.0498083
ENSMUSG00000015668	Pdzd11	1721.21	1862.97	1579.46	0.84782	-0.23817	0.0116477	0.0497555
ENSMUSG00000082588	Gm15443	186.074	216.216	155.933	0.72119	-0.471548	0.0116437	0.0497478
ENSMUSG00000064032	Gm10143	33.8325	45.6929	21.972	0.480863	-1.0563	0.0116246	0.0496759
ENSMUSG00000032000	Birc3	730.392	647.404	813.379	1.25637	0.32926	0.011602	0.049589
ENSMUSG00000026869	Psmd5	1876.57	2028.34	1724.81	0.850356	-0.233861	0.0115969	0.0495767
ENSMUSG00000032263	Bckdhb	1674.61	1833.22	1516.01	0.826962	-0.274107	0.0115813	0.0495195
ENSMUSG00000061972	Olfr99	4.56075	1.59712	7.52439	4.71124	2.23611	0.0115664	0.0494652
ENSMUSG00000031093	Dock11	1302.87	1186.54	1419.21	1.19609	0.258326	0.0115524	0.0494151
ENSMUSG00000018707	Dync1h1	36912.4	34424.9	39399.9	1.14452	0.194738	0.0115488	0.049409
ENSMUSG00000022106	Rcbtb2	3397.45	3665.99	3128.91	0.853496	-0.228543	0.0115064	0.0492374
ENSMUSG00000058756	Thra	12804.7	13851.6	11757.8	0.84884	-0.236435	0.0114955	0.0492002
ENSMUSG00000032080	Apoa4	2.31221	4.62442	0	0	#NAME?	0.011486	0.0491689
ENSMUSG00000089129		8.33867	4.73454	11.9428	2.52248	1.33484	0.0114824	0.0491685
ENSMUSG00000033342	4833424O15Rik	78.2139	90.8198	65.6079	0.722397	-0.469137	0.0114837	0.0491685
ENSMUSG00000019971	Cep290	492.937	440.584	545.29	1.23765	0.307605	0.0114789	0.0491672
ENSMUSG00000035967	Ddx26b	4874.61	4491.45	5257.76	1.17062	0.227267	0.0114579	0.0490864
ENSMUSG00000032766	Gng11	3910.4	3566.81	4253.98	1.19266	0.254178	0.011428	0.0489679
ENSMUSG00000086084	2610528B01Rik	114.057	91.2721	136.842	1.49928	0.584266	0.0114153	0.0489229
ENSMUSG00000022053	Ebf2	1144.76	1032.76	1256.77	1.21691	0.283226	0.0114143	0.0489229
ENSMUSG00000025403	Shmt2	3442.74	3775.27	3110.21	0.823838	-0.279567	0.011407	0.0489064
ENSMUSG00000028218	Fam92a	2613.2	2854.15	2372.24	0.831155	-0.26681	0.0113892	0.0488393
ENSMUSG00000036834	Plch1	20.6669	28.3658	12.968	0.457172	-1.12919	0.0113878	0.0488393
ENSMUSG00000027248	Pdia3	17449.2	18747.6	16150.8	0.861489	-0.215096	0.0113675	0.0487652
ENSMUSG00000028550	Atg4c	599.031	664.762	533.3	0.802241	-0.317892	0.0113663	0.0487652
ENSMUSG00000017417	Plxdc1	458.463	412.203	504.722	1.22445	0.292134	0.0113607	0.0487551
ENSMUSG00000049517	Rps23	2209.13	2375.47	2042.79	0.85995	-0.217676	0.0113512	0.0487237
ENSMUSG00000049299	Trappc1	2925.51	3147.76	2703.27	0.85879	-0.219622	0.0113468	0.0487144
ENSMUSG00000032625	Thsd7a	690.474	634.042	746.907	1.17801	0.236351	0.0113116	0.0485726
ENSMUSG00000056899	Immp2l	135.883	109.266	162.501	1.48721	0.572605	0.0112991	0.0485283
ENSMUSG00000022108	Itm2b	24609.8	22701.7	26518	1.16811	0.224174	0.0112556	0.0483509
ENSMUSG00000032560	Dnajc13	5605.12	5132.26	6077.99	1.18427	0.243999	0.0112428	0.0483051
ENSMUSG00000037759	Ptger2	13.4942	5.71193	21.2765	3.72493	1.89721	0.0112171	0.0482042
ENSMUSG00000009281	Rarres2	879.302	792.835	965.77	1.21812	0.28466	0.0112032	0.0481589
ENSMUSG00000029472	Anapc5	22246.7	23938.6	20554.8	0.858648	-0.219861	0.0112044	0.0481589
ENSMUSG00000075271	Ttc30a1	477.714	532.746	422.681	0.793401	-0.333878	0.0111926	0.0481268
ENSMUSG00000024891	Slc29a2	1901.31	2068.49	1734.14	0.838357	-0.254363	0.0111803	0.0480835
ENSMUSG00000029640	Usp12	2907.79	2662.26	3153.32	1.18445	0.244217	0.0111726	0.0480593
ENSMUSG00000090115	Usp49	904.894	997.945	811.842	0.813514	-0.297761	0.0111714	0.0480593
ENSMUSG00000089838	Gm2962	259.369	233.657	285.081	1.22008	0.286979	0.0111637	0.0480398
ENSMUSG00000030579	Tyrobp	309.349	268.557	350.141	1.30379	0.38271	0.0111493	0.0479871
ENSMUSG00000041180	Hectd2	450.121	395.351	504.89	1.27707	0.352834	0.0111388	0.0479514
ENSMUSG00000020153	Ndufs7	11560.7	10699.5	12421.9	1.16098	0.215347	0.011138	0.0479514
ENSMUSG00000027671	Actl6a	2978.24	3222.02	2734.46	0.84868	-0.236708	0.0111145	0.0478654
ENSMUSG00000021124	Vti1b	2963.4	2681.34	3245.46	1.21039	0.275472	0.0111118	0.0478629
ENSMUSG00000024800	Rpp30	685.428	751.679	619.177	0.823725	-0.279765	0.0111104	0.0478629
ENSMUSG00000053332	Gas5	3887.84	4170.83	3604.85	0.864301	-0.210395	0.0110968	0.0478169
ENSMUSG00000025171	Ubtd1	1451.11	1339.29	1562.93	1.16698	0.222777	0.011092	0.0478054
ENSMUSG00000053168	9030619P08Rik	2.25106	0	4.50211	Inf	Inf	0.0110766	0.0477487
ENSMUSG00000041670	Rims1	29.2506	39.6927	18.8085	0.473854	-1.07749	0.011074	0.0477468
ENSMUSG00000018927	Ccl6	96.7739	76.6656	116.882	1.52457	0.608405	0.011061	0.0476999
ENSMUSG00000027326	Casc5	1734.71	1888.26	1581.16	0.83736	-0.256081	0.0110324	0.0475859
ENSMUSG00000032586	Traip	404.018	462.349	345.686	0.747673	-0.419521	0.0110311	0.0475859
ENSMUSG00000070140	Mir483	18.4203	25.2531	11.5875	0.458854	-1.12389	0.0110071	0.047495
ENSMUSG00000026288	Inpp5d	1139.59	1038.42	1240.77	1.19486	0.256842	0.0110039	0.0474923
ENSMUSG00000003062	Stard3nl	1069.66	1155.88	983.447	0.850824	-0.233067	0.0110043	0.0474923
ENSMUSG00000084803	5830444B04Rik	53.2816	42.163	64.4002	1.52741	0.611086	0.0109932	0.0474791
ENSMUSG00000052331	Ankrd44	1319.11	1204.52	1433.69	1.19026	0.251277	0.0109968	0.0474791
ENSMUSG00000021131	Erh	2831.39	3058.47	2604.3	0.851504	-0.231915	0.0109969	0.0474791
ENSMUSG00000087377	AV099323	25.4101	34.3804	16.4398	0.478176	-1.06439	0.0109897	0.0474754
ENSMUSG00000037996	Slc24a2	582.859	642.874	522.843	0.81329	-0.298159	0.0109843	0.0474614
ENSMUSG00000079045	Gm17566	165.615	189.568	141.663	0.747296	-0.420249	0.0109838	0.0474614
ENSMUSG00000031616	Ednra	6063.98	5566.14	6561.83	1.17888	0.237422	0.0109742	0.0474365
ENSMUSG00000049881	2810025M15Rik	3044.2	3288.12	2800.27	0.851632	-0.231698	0.0109726	0.0474365
ENSMUSG00000040809	Chi3l3	8.8171	14.0367	3.59749	0.256292	-1.96414	0.0109527	0.0473618
ENSMUSG00000044702	Palb2	288.412	322.026	254.797	0.791233	-0.337826	0.0109433	0.0473305
ENSMUSG00000025025	Mxi1	2588.91	2817.92	2359.91	0.837464	-0.255901	0.0109195	0.0472367
ENSMUSG00000079410	Gm2897	95.7548	74.9924	116.517	1.55372	0.635726	0.0109094	0.0472022
ENSMUSG00000066043	Phactr4	3793.44	4131.94	3454.93	0.836152	-0.258163	0.010857	0.0469849
ENSMUSG00000028970	Abcb1b	160.774	134.933	186.616	1.38302	0.467826	0.0108379	0.0469113
ENSMUSG00000037827	Gm5884	3071.63	2861.91	3281.35	1.14656	0.197312	0.0108192	0.0468396
ENSMUSG00000030086	Chchd6	775.166	859.781	690.551	0.803171	-0.316221	0.0108191	0.0468396
ENSMUSG00000052117	D630039A03Rik	38.9045	25.0858	52.7233	2.10172	1.07157	0.0108078	0.0468201
ENSMUSG00000044716	Dok7	1707.53	1887.93	1527.13	0.808892	-0.305982	0.0108105	0.0468201
ENSMUSG00000028871	Rspo1	92.8654	110.183	75.548	0.68566	-0.544434	0.0108098	0.0468201
ENSMUSG00000021975	Ints9	1201.84	1327.73	1075.95	0.810367	-0.303352	0.0107918	0.0467665
ENSMUSG00000062038	Gm10108	72.903	97.2658	48.5401	0.499046	-1.00276	0.0107877	0.0467578
ENSMUSG00000015149	Sirt2	4979.33	4629.18	5329.47	1.15128	0.203236	0.0107766	0.0467191
ENSMUSG00000042918	Mamstr	1102.27	1219.52	985.009	0.8077	-0.308108	0.0107704	0.0467013
ENSMUSG00000040749	Siah1b	481.029	534.255	427.802	0.800746	-0.320584	0.0107688	0.0467013
ENSMUSG00000037111	Setd7	8742.68	8054.09	9431.28	1.17099	0.227731	0.010751	0.0466353
ENSMUSG00000021253	Tgfb3	1651.78	1480.58	1822.98	1.23126	0.300136	0.0107251	0.04654
ENSMUSG00000022429	Dmc1	64.8257	78.7264	50.9249	0.64686	-0.628476	0.0107269	0.04654
ENSMUSG00000029787	Avl9	1319.25	1183.46	1455.04	1.22948	0.298043	0.0107169	0.0465147
ENSMUSG00000056665	4930572J05Rik	357.025	327.772	386.277	1.17849	0.236945	0.0107096	0.0464921
ENSMUSG00000026192	Atic	2785.54	3025.41	2545.67	0.84143	-0.249084	0.0106699	0.0463288
ENSMUSG00000086308	G630016G05Rik	36.3021	50.1561	22.448	0.447562	-1.15984	0.0106463	0.0462354
ENSMUSG00000026198	Abcb6	1795.6	1633.41	1957.79	1.19859	0.261344	0.0106301	0.0461744
ENSMUSG00000026860	Sh3glb2	5610.23	6100.38	5120.08	0.839305	-0.252733	0.0106237	0.0461553
ENSMUSG00000026064	Ptp4a1	12925.5	11977.5	13873.6	1.1583	0.212008	0.0105958	0.0460433
ENSMUSG00000014164	Klhl3	715.779	805.667	625.89	0.776859	-0.364275	0.0105716	0.045947
ENSMUSG00000079993	Gm11799	6.41312	2.57775	10.2485	3.97574	1.99122	0.0105594	0.045903
ENSMUSG00000034930	Rtkn	557.528	637.117	477.94	0.750161	-0.414728	0.0105541	0.0458893
ENSMUSG00000046057	Gm15428	50.7224	63.5188	37.9259	0.597082	-0.743998	0.0105358	0.0458184
ENSMUSG00000086188	Gm15169	7.47847	12.1438	2.81313	0.231651	-2.10998	0.0105303	0.0458034
ENSMUSG00000004610	Etfb	24988.1	22824.2	27152	1.18961	0.250491	0.0105192	0.0457645
ENSMUSG00000065431	Mir186	49.0997	36.8015	61.3979	1.66835	0.738426	0.0105164	0.0457612
ENSMUSG00000006204	5430419D17Rik	24.7243	16.4756	32.973	2.00132	1.00095	0.0105106	0.0457448
ENSMUSG00000020546	Stxbp4	927.862	1027.9	827.823	0.805353	-0.312307	0.0105062	0.0457347
ENSMUSG00000074227	Spint2	2169.45	2357.87	1981.03	0.840177	-0.251235	0.010496	0.0456995
ENSMUSG00000096847	Tmem151b	12.4328	19.1349	5.73083	0.299497	-1.73939	0.0104826	0.0456497
ENSMUSG00000015092	Edf1	4884.96	4534.88	5235.04	1.15439	0.207137	0.0104788	0.0456425
ENSMUSG00000032718	Mansc1	670.875	758.722	583.027	0.768433	-0.380008	0.0104762	0.0456398
ENSMUSG00000022416	Cacna1i	5.63592	1.24792	10.0239	8.03247	3.00584	0.0104388	0.0454858
ENSMUSG00000026490	Cdc42bpa	6277.79	5847.77	6707.82	1.14707	0.197959	0.0104288	0.0454514
ENSMUSG00000023903	Mmp25	87.2502	64.3941	110.106	1.70988	0.773894	0.0104158	0.0454037
ENSMUSG00000026547	Tagln2	13408.8	12216.3	14601.4	1.19524	0.257305	0.0104157	0.0454037
ENSMUSG00000058979	Cecr5	1495.72	1377.78	1613.66	1.1712	0.227988	0.0103926	0.0453203
ENSMUSG00000028524	Sgip1	602.853	536.085	669.62	1.24909	0.320883	0.0103876	0.0453075
ENSMUSG00000030225	Dera	630.962	701.526	560.398	0.798827	-0.324045	0.0103614	0.0452021
ENSMUSG00000027500	Stmn2	335.878	286.801	384.954	1.34223	0.424637	0.010338	0.045109
ENSMUSG00000021147	Wdr37	3231.56	2939.35	3523.76	1.19882	0.261617	0.0103326	0.0450943
ENSMUSG00000059866	Tnip2	977.573	878.474	1076.67	1.22562	0.293507	0.0103302	0.0450927
ENSMUSG00000054226	Tprkb	873.358	962.483	784.233	0.814803	-0.295478	0.0103282	0.0450927
ENSMUSG00000061778	Mospd2	1406.98	1282.36	1531.6	1.19436	0.256233	0.0103157	0.0450475
ENSMUSG00000000579	Dynlt1c	1145.1	1217.63	1072.57	0.880866	-0.183005	0.0103158	0.0450475
ENSMUSG00000022246	Rai14	1739.36	1562.69	1916.03	1.22611	0.29409	0.0102988	0.044998
ENSMUSG00000055493	Epm2a	1104.37	993.142	1215.6	1.22399	0.291595	0.0103004	0.044998
ENSMUSG00000090610	Gm3571	85.2894	105.949	64.6298	0.610009	-0.713099	0.0102841	0.0449446
ENSMUSG00000021619	Atg10	1011.29	1101.69	920.895	0.835893	-0.25861	0.0102689	0.0448868
ENSMUSG00000006395	Hyi	371.921	410.517	333.325	0.811964	-0.300513	0.0102602	0.0448577
ENSMUSG00000034105	4632415K11Rik	994.706	1082.23	907.181	0.83825	-0.254548	0.0102529	0.0448346
ENSMUSG00000029624	Ptcd1	1836.9	2007.56	1666.23	0.829977	-0.268857	0.0102473	0.0448192
ENSMUSG00000081817	Gm13590	8.27311	5.02679	11.5194	2.29161	1.19636	0.0102352	0.044775
ENSMUSG00000000167	Pih1d2	33.6262	43.7221	23.5303	0.538178	-0.893844	0.0102311	0.0447658
ENSMUSG00000035283	Adrb1	1660.95	1833.16	1488.75	0.812121	-0.300233	0.0102032	0.0446524
ENSMUSG00000007836	Hnrnpa0	11466.9	12271.4	10662.4	0.868882	-0.202768	0.0101971	0.0446347
ENSMUSG00000027977	Ndst3	122.53	143.325	101.734	0.709816	-0.494483	0.0101956	0.0446347
ENSMUSG00000071708	Sms	1730.31	1896.91	1563.71	0.82435	-0.27867	0.01019	0.0446214
ENSMUSG00000033308	Dpyd	469.836	411.785	527.887	1.28195	0.358337	0.0101825	0.0445971
ENSMUSG00000030165	Klrd1	5.22851	1.44748	9.00954	6.22428	2.63791	0.0101785	0.0445954
ENSMUSG00000032289	Thsd4	1599.58	1777.34	1421.82	0.799973	-0.321977	0.0101801	0.0445954
ENSMUSG00000028576	Ift74	744.782	816.626	672.939	0.824048	-0.2792	0.0101753	0.0445921
ENSMUSG00000024511	Rab27b	178.023	205.102	150.945	0.735949	-0.442323	0.010152	0.044499
ENSMUSG00000042389	Tsen2	784.709	866.73	702.688	0.810734	-0.302699	0.0101479	0.0444897
ENSMUSG00000034681	Rnps1	5113.24	5557.68	4668.8	0.840063	-0.251431	0.0101282	0.0444123
ENSMUSG00000018666	Cbx1	5341.33	5717.15	4965.51	0.868529	-0.203355	0.0101085	0.0443346
ENSMUSG00000045281	Gpr20	60.4692	45.7465	75.1919	1.64367	0.716917	0.0100949	0.0442836
ENSMUSG00000026571	Dcaf6	5396.39	4947.56	5845.22	1.18143	0.240539	0.0100655	0.0441634
ENSMUSG00000025630	Hprt	6582.11	7134.45	6029.78	0.845164	-0.242696	0.0100644	0.0441634
ENSMUSG00000026482	Rgl1	6474.48	7058.85	5890.12	0.834431	-0.261136	0.0100475	0.0441021
ENSMUSG00000022604	Cep97	1208.63	1336.38	1080.88	0.808813	-0.306122	0.0100396	0.0440759
ENSMUSG00000089764	Gm16580	121.079	143.873	98.2836	0.683126	-0.549776	0.00997681	0.043809
ENSMUSG00000033658	Ddx19b	1859.05	1687.84	2030.26	1.20287	0.266484	0.00996767	0.0437775
ENSMUSG00000053218	Gm9900	100.465	80.5797	120.35	1.49355	0.57875	0.00994676	0.0436943
ENSMUSG00000051851	Cxx1c	1002.04	1086.44	917.644	0.844634	-0.243603	0.00993955	0.0436713
ENSMUSG00000032702	Kank1	5115.44	5530.44	4700.45	0.849923	-0.234597	0.00993374	0.0436545
ENSMUSG00000031015	Swap70	2425.75	2215.18	2636.31	1.19011	0.251097	0.00992696	0.0436333
ENSMUSG00000021764	Ndufs4	9441.13	8539.82	10342.4	1.21108	0.276297	0.00991351	0.0435828
ENSMUSG00000022575	Gsdmd	629.28	567.514	691.047	1.21767	0.284128	0.00988812	0.0434799
ENSMUSG00000074529	C330013J21Rik	27.8278	19.0741	36.5815	1.91786	0.939496	0.00985048	0.043323
ENSMUSG00000090628	Gm17083	14.0701	7.43372	20.7064	2.78547	1.47792	0.00983134	0.0432473
ENSMUSG00000021134	Srsf5	22244.1	20166.2	24322	1.20608	0.270327	0.00981663	0.0431912
ENSMUSG00000030220	Arhgdib	1549.25	1413.96	1684.53	1.19136	0.252604	0.00981157	0.0431775
ENSMUSG00000045438	Cox19	2441.96	2207.52	2676.4	1.2124	0.277868	0.0098095	0.043177
ENSMUSG00000038622	Med30	987.142	1079	895.28	0.829728	-0.269289	0.00979158	0.0431067
ENSMUSG00000023147	Wrb	1130.35	1224.07	1036.64	0.846882	-0.239767	0.00977682	0.0430503
ENSMUSG00000063047	Zfp780b	289.003	251.3	326.706	1.30006	0.37858	0.00977308	0.0430423
ENSMUSG00000020572	Nampt	3911.23	3616.39	4206.07	1.16306	0.217924	0.00976999	0.0430423
ENSMUSG00000022401	Xpnpep3	1656.86	1817.04	1496.67	0.823686	-0.279834	0.00977217	0.0430423
ENSMUSG00000028631	Kcnq4	438.779	389.307	488.251	1.25415	0.326715	0.00976629	0.0430381
ENSMUSG00000025532	Crcp	963.525	1047.68	879.365	0.839341	-0.25267	0.00975668	0.0430043
ENSMUSG00000040234	Tm7sf3	2494.02	2681.67	2306.38	0.860053	-0.217502	0.0097303	0.0428966
ENSMUSG00000049690	Nckap5	1175.05	1062.76	1287.34	1.21132	0.276576	0.00972323	0.0428739
ENSMUSG00000019863	Qrsl1	2569.01	2351.13	2786.89	1.18534	0.245305	0.00971849	0.0428616
ENSMUSG00000001157	Gmcl1	1101.02	1184.15	1017.89	0.859598	-0.218267	0.00971781	0.0428616
ENSMUSG00000026385	Dbi	10278.5	11182.8	9374.13	0.838259	-0.254532	0.00971815	0.0428616
ENSMUSG00000085069	Gm13111	802.342	890.473	714.211	0.802058	-0.318222	0.00971644	0.0428616
ENSMUSG00000022488	Nckap1l	555.217	492.838	617.596	1.25314	0.325552	0.00968254	0.0427371
ENSMUSG00000045917	6330416G13Rik	654.079	732.23	575.928	0.786539	-0.346409	0.00967995	0.0427341
ENSMUSG00000047003	Zfp41	981.876	1089.25	874.506	0.802856	-0.316788	0.00966361	0.0426705
ENSMUSG00000038583	Pln	308971	285210	332733	1.16663	0.222343	0.00966158	0.04267
ENSMUSG00000036553	Sh3tc1	1592.64	1465.25	1720.02	1.17387	0.231272	0.00965227	0.0426374
ENSMUSG00000036199	Ndufa13	13588.4	12581	14595.9	1.16016	0.21432	0.00963556	0.0425782
ENSMUSG00000011837	Snapc2	1270.98	1384.16	1157.8	0.836467	-0.257619	0.00963695	0.0425782
ENSMUSG00000041997	Tlk1	6477.9	7045.64	5910.15	0.838838	-0.253536	0.00962797	0.0425555
ENSMUSG00000032470	Mras	1060.3	1154.33	966.269	0.837081	-0.256561	0.00962177	0.0425382
ENSMUSG00000023047	Amhr2	19.5332	28.2476	10.8188	0.382998	-1.38459	0.00962212	0.0425382
ENSMUSG00000024143	Rhoq	14740.4	13432.6	16048.2	1.19472	0.256678	0.00959575	0.0424389
ENSMUSG00000026393	Nek7	5906.74	5438.73	6374.74	1.1721	0.229097	0.00959583	0.0424389
ENSMUSG00000030166	Rad52	757.617	835.147	680.088	0.814333	-0.296309	0.00959445	0.0424389
ENSMUSG00000017466	Timp2	13987.6	12687.2	15288.1	1.205	0.269032	0.00958612	0.0424214
ENSMUSG00000022849	Hspbap1	290.482	326.738	254.226	0.778072	-0.362025	0.00954962	0.0422683
ENSMUSG00000095062		17.1521	9.19516	25.1091	2.73069	1.44926	0.00954694	0.0422649
ENSMUSG00000036560	Lgi4	32.218	24.6966	39.7393	1.6091	0.686253	0.00952461	0.0421744
ENSMUSG00000067356	B430203G13Rik	54.0452	39.262	68.8284	1.75306	0.809872	0.00951622	0.0421457
ENSMUSG00000044043	Pcdhb14	186.235	156.912	215.558	1.37375	0.458121	0.00949688	0.0420684
ENSMUSG00000054116	E130116L18Rik	6.02292	1.8076	10.2383	5.66401	2.50182	0.00948255	0.0420204
ENSMUSG00000088249		6.95055	2.85206	11.049	3.87406	1.95385	0.00948414	0.0420204
ENSMUSG00000071748	Gm14698	3082.51	3364.3	2800.72	0.832483	-0.264506	0.00947073	0.0419778
ENSMUSG00000037594	BC022687	345.426	387.114	303.739	0.784625	-0.349925	0.00946481	0.04196
ENSMUSG00000053819	Camk2d	20601.7	18810.8	22392.6	1.19041	0.251459	0.00945818	0.041939
ENSMUSG00000042302	Ehbp1	8489.35	9237.09	7741.61	0.8381	-0.254805	0.00944745	0.0418998
ENSMUSG00000022394	L3mbtl2	1368.28	1507.41	1229.16	0.815408	-0.294405	0.00944736	0.0418998
ENSMUSG00000020895	Tmem107	308.089	353.769	262.409	0.741752	-0.43099	0.00944484	0.0418998
ENSMUSG00000003352	Cacnb3	1268.26	1170.12	1366.41	1.16775	0.223732	0.0094274	0.041836
ENSMUSG00000084349	Rpl3-ps1	20426.8	22081.5	18772.1	0.85013	-0.234245	0.00941667	0.0417967
ENSMUSG00000028800	Hdac1	2492.83	2702.38	2283.27	0.844911	-0.243129	0.00941143	0.0417819
ENSMUSG00000018965	Ywhah	14213.9	15332.8	13095	0.854053	-0.227602	0.00940268	0.0417514
ENSMUSG00000022637	Cblb	2196.15	2414.45	1977.86	0.819176	-0.287755	0.00937912	0.0416551
ENSMUSG00000029478	Ncor2	10578.1	9963.91	11192.2	1.12328	0.167712	0.00936891	0.0416181
ENSMUSG00000085105	Gm12758	121.205	100.335	142.074	1.41601	0.501827	0.00936411	0.0416051
ENSMUSG00000036775	Decr2	1683.9	1824.39	1543.41	0.845989	-0.24129	0.00936281	0.0416051
ENSMUSG00000037997	Parp11	1065.44	1168.54	962.332	0.823531	-0.280105	0.00935662	0.0415885
ENSMUSG00000082345	Gm13622	11.6235	5.12339	18.1235	3.53741	1.82269	0.00934808	0.0415589
ENSMUSG00000005540	Fcer2a	22.134	14.657	29.6111	2.02028	1.01455	0.00932982	0.041486
ENSMUSG00000078695	Cisd3	2203.44	2028.84	2378.04	1.17212	0.229117	0.00931273	0.0414184
ENSMUSG00000031924	Cyb5b	8288.93	8988.2	7589.66	0.844403	-0.243997	0.00931236	0.0414184
ENSMUSG00000020435	Osbp2	653.228	750.422	556.034	0.740962	-0.432529	0.00929975	0.0413773
ENSMUSG00000031639	Tlr3	990.085	904.236	1075.93	1.18988	0.250819	0.00927371	0.0412697
ENSMUSG00000038354	Ankrd35	61.3294	47.8536	74.8051	1.56321	0.644508	0.00925654	0.0412016
ENSMUSG00000082123	Gm16149	2.62962	0.192539	5.06671	26.3152	4.71783	0.00924771	0.0411705
ENSMUSG00000026339	Ccdc93	2100.58	1899.94	2301.23	1.21121	0.276445	0.00923917	0.0411408
ENSMUSG00000002679	Med6	928.736	1012.61	844.858	0.834333	-0.261304	0.00923567	0.0411335
ENSMUSG00000053522	Lgals7	31.0628	41.2934	20.8322	0.504492	-0.987095	0.00921963	0.0410703
ENSMUSG00000048911	Rnf24	909.318	821.913	996.724	1.21269	0.278208	0.00920367	0.0410074
ENSMUSG00000084808	9430091E24Rik	526.449	471.01	581.887	1.2354	0.30498	0.00920174	0.0410071
ENSMUSG00000087610	Gm16253	87.1245	68.1803	106.069	1.55571	0.637573	0.00919014	0.0409636
ENSMUSG00000010205	Raver1	5082.06	5626.79	4537.33	0.80638	-0.310469	0.0091428	0.0407608
ENSMUSG00000042589	Cux2	1106.11	1226.37	985.845	0.80387	-0.314965	0.00913864	0.0407504
ENSMUSG00000027762	Sucnr1	8.31509	3.78277	12.8474	3.39629	1.76396	0.00913506	0.0407427
ENSMUSG00000003166	Dgcr2	3852.4	4158.88	3545.91	0.852611	-0.23004	0.00908661	0.0405348
ENSMUSG00000000318	Clec10a	21.9602	15.0882	28.8322	1.91091	0.93426	0.00905807	0.0404156
ENSMUSG00000053825	Ppfia2	121.425	103.394	139.456	1.34878	0.43166	0.00904469	0.040364
ENSMUSG00000033684	Qsox1	4581.43	4192.7	4970.16	1.18543	0.245413	0.0090425	0.0403624
ENSMUSG00000032094	Cd3d	9.20852	4.03226	14.3848	3.56743	1.83489	0.00899224	0.0401461
ENSMUSG00000008730	Hipk1	8402.84	7789.65	9016.04	1.15744	0.210936	0.00898458	0.04012
ENSMUSG00000030785	Cox6a2	33876.3	31505.5	36247	1.1505	0.202259	0.00895711	0.0400054
ENSMUSG00000074136	4930513N10Rik	234.833	274.899	194.767	0.708503	-0.497154	0.0089561	0.0400054
ENSMUSG00000025521	Tmem192	921.812	823.7	1019.92	1.23822	0.308269	0.00894301	0.0399586
ENSMUSG00000080316	Ncrna00085	2956.53	3229.76	2683.3	0.830804	-0.26742	0.00894259	0.0399586
ENSMUSG00000027859	Ngf	317.503	269.435	365.571	1.35681	0.440214	0.0089249	0.0398937
ENSMUSG00000059361	Nrsn2	4.26178	7.84376	0.679793	0.0866668	-3.52838	0.00890196	0.0397992
ENSMUSG00000039903	4931408A02Rik	67.9284	51.6711	84.1857	1.62926	0.704218	0.00888699	0.0397403
ENSMUSG00000031209	Heph	1751.86	1918.55	1585.17	0.826234	-0.275377	0.00886626	0.0396556
ENSMUSG00000085705	Gm16046	86.9366	65.1997	108.674	1.66678	0.737066	0.00886071	0.0396388
ENSMUSG00000009207	Lnp	1672.12	1545.93	1798.31	1.16325	0.21816	0.008843	0.0395675
ENSMUSG00000042604	Kcna4	456.56	504.413	408.707	0.810263	-0.303538	0.00883925	0.0395588
ENSMUSG00000050530	Fam171a1	4150.21	4520.21	3780.22	0.836293	-0.257919	0.00883306	0.0395391
ENSMUSG00000057497	Fam136a	2143.32	2340.58	1946.06	0.831444	-0.266309	0.00882144	0.039495
ENSMUSG00000020648	Dus4l	492.351	547.007	437.695	0.800165	-0.321631	0.00881698	0.039483
ENSMUSG00000039911	Spsb1	1852.33	1718.01	1986.66	1.15637	0.209602	0.00880659	0.0394445
ENSMUSG00000052087	Rgs14	40.8223	27.1533	54.4912	2.0068	1.00489	0.00878516	0.0393565
ENSMUSG00000005683	Cs	99546	92284.7	106807	1.15737	0.210845	0.00878365	0.0393565
ENSMUSG00000031104	Rab33a	22.5818	31.5632	13.6004	0.430894	-1.21459	0.0087773	0.0393371
ENSMUSG00000068663	Clec16a	4074.55	3750.35	4398.75	1.17289	0.230068	0.00872434	0.0391077
ENSMUSG00000049124	Gm8186	1113.05	1212.64	1013.47	0.835753	-0.258851	0.00870433	0.0390259
ENSMUSG00000029120	Ppp2r2c	16.0545	7.26614	24.8428	3.41898	1.77357	0.00869896	0.0390097
ENSMUSG00000032845	Alpk2	9421.92	10193.8	8650.01	0.848553	-0.236923	0.00869677	0.0390078
ENSMUSG00000068227	Il2rb	26.74	16.6999	36.7802	2.20242	1.13909	0.00867728	0.0389283
ENSMUSG00000007476	Lrrc8a	3938.7	3646.53	4230.86	1.16024	0.214427	0.008675	0.0389259
ENSMUSG00000029003	Mad2l2	705.168	782.523	627.814	0.802294	-0.317797	0.00866703	0.038898
ENSMUSG00000053297	AI854703	96.4301	118.667	74.1935	0.625226	-0.677551	0.00862962	0.038738
ENSMUSG00000039488	Cntn5	16.7196	10.9132	22.526	2.06411	1.04552	0.00862171	0.0387103
ENSMUSG00000038462	Uqcrfs1	38611.3	35382.8	41839.8	1.18249	0.241829	0.00861016	0.038668
ENSMUSG00000024479	Mal2	9.18353	15.099	3.26809	0.216445	-2.20793	0.00861054	0.038668
ENSMUSG00000006522	Itih3	20.2567	28.2411	12.2723	0.434555	-1.20239	0.0085904	0.0385932
ENSMUSG00000028617	Lrrc42	1301.92	1420.81	1183.02	0.83264	-0.264235	0.0085836	0.0385705
ENSMUSG00000086502	B130055M24Rik	258.179	228.03	288.329	1.26444	0.338495	0.00857817	0.0385539
ENSMUSG00000057657	Gm10260	22.6322	36.2497	9.01472	0.248684	-2.00761	0.00857525	0.0385486
ENSMUSG00000036461	Elf1	2491.57	2295.77	2687.37	1.17057	0.227217	0.00856395	0.0385056
ENSMUSG00000058799	Nap1l1	6197.83	6684.03	5711.62	0.854517	-0.226818	0.00855584	0.038477
ENSMUSG00000005950	P2rx5	416.779	352.286	481.273	1.36614	0.450108	0.00853925	0.0384101
ENSMUSG00000087516	Gm2301	46.0528	31.706	60.3996	1.90499	0.929783	0.00851123	0.0382919
ENSMUSG00000024921	Smarca2	5665.23	5176.79	6153.67	1.1887	0.24939	0.00849548	0.0382288
ENSMUSG00000010406	Mrpl52	2033.69	2231.49	1835.88	0.822715	-0.281536	0.00849075	0.0382153
ENSMUSG00000078970	Wdr92	903.501	994.307	812.695	0.817349	-0.290977	0.0084863	0.038203
ENSMUSG00000059816	Fam159a	22.4686	31.8806	13.0567	0.40955	-1.28789	0.00847129	0.0381506
ENSMUSG00000014542	Clec4f	3.6028	6.42124	0.784368	0.122152	-3.03325	0.00847293	0.0381506
ENSMUSG00000051373	Ppapdc3	1632.23	1473.17	1791.3	1.21595	0.282083	0.00846117	0.0381131
ENSMUSG00000062944	9130023H24Rik	439.463	491.639	387.288	0.787749	-0.344193	0.00846017	0.0381131
ENSMUSG00000046185	Zfp84	1095.89	985.301	1206.49	1.22448	0.292175	0.00844761	0.0380675
ENSMUSG00000082778	Gm15191	36.7957	28.3716	45.2198	1.59384	0.672506	0.00842925	0.0379925
ENSMUSG00000027187	Cat	11742.9	10842.7	12643.2	1.16605	0.221634	0.00841575	0.0379394
ENSMUSG00000089812	Gm15867	42.8998	28.9505	56.849	1.96366	0.973545	0.00840547	0.0379007
ENSMUSG00000080727	C920021L13Rik	411.583	365.11	458.055	1.25457	0.327191	0.00840442	0.0379007
ENSMUSG00000072875	Gpr27	99.4639	78.8822	120.046	1.52184	0.605812	0.00840125	0.0378971
ENSMUSG00000046727	0610010O12Rik	1673.16	1541.56	1804.76	1.17074	0.227417	0.00839792	0.0378898
ENSMUSG00000087557	Gm15869	8.65318	2.11077	15.1956	7.19907	2.84781	0.00838958	0.0378599
ENSMUSG00000027387	Zc3h8	502.778	550.426	455.13	0.826868	-0.27427	0.00838836	0.0378599
ENSMUSG00000022799	Arhgap31	10228.3	11243.4	9213.27	0.819436	-0.287296	0.00838883	0.0378599
ENSMUSG00000059631	1500035N22Rik	43.9399	56.0143	31.8654	0.56888	-0.813803	0.00836936	0.0377918
ENSMUSG00000087690	Gm16031	59.4059	41.0943	77.7176	1.8912	0.919305	0.00836223	0.0377673
ENSMUSG00000026249	Serpine2	3630.95	3906.62	3355.29	0.858873	-0.219483	0.00835795	0.0377557
ENSMUSG00000093985	Gm10406	45.7478	32.7117	58.7838	1.79702	0.84561	0.0083035	0.0375173
ENSMUSG00000025127	Gcgr	58.8426	35.3658	82.3194	2.32765	1.21888	0.00827797	0.037418
ENSMUSG00000031367	Ap1s2	2287.39	2086.41	2488.36	1.19265	0.25417	0.00827982	0.037418
ENSMUSG00000031523	Dlc1	17937	19580.4	16293.5	0.832132	-0.265115	0.00827973	0.037418
ENSMUSG00000087382	1300015D01Rik	59.6357	75.505	43.7664	0.579649	-0.786749	0.00827775	0.037418
ENSMUSG00000079057	Cyp4v3	125.048	100.774	149.323	1.48175	0.567305	0.00825999	0.0373654
ENSMUSG00000026648	Dclre1c	496.115	439.703	552.527	1.25659	0.329516	0.00826144	0.0373654
ENSMUSG00000028689	Ccdc163	578.47	644.414	512.527	0.795337	-0.330362	0.00825337	0.0373442
ENSMUSG00000037348	Paqr7	1048.69	1167.27	930.117	0.796835	-0.327648	0.00824643	0.0373204
ENSMUSG00000038695	Josd2	4260.6	4611.56	3909.63	0.847789	-0.238222	0.0082444	0.0373188
ENSMUSG00000048186	Bend7	514.736	449.827	579.645	1.28859	0.365798	0.00823882	0.0373012
ENSMUSG00000039286	Fndc3b	7380.66	6849.94	7911.38	1.15496	0.207837	0.00819603	0.037115
ENSMUSG00000021910	Nisch	39086.6	42753	35420.1	0.828482	-0.271457	0.00818357	0.0370662
ENSMUSG00000031922	Cep57	2327.71	2560.87	2094.54	0.817901	-0.290002	0.00817016	0.037013
ENSMUSG00000043065	Spice1	981.343	1083.66	879.025	0.811163	-0.301937	0.00816986	0.037013
ENSMUSG00000040681	Hmgn1	6946.24	7525.79	6366.69	0.845984	-0.241298	0.00816414	0.0370008
ENSMUSG00000038489	Polr2l	1483.83	1371.29	1596.38	1.16414	0.219269	0.00815877	0.0369853
ENSMUSG00000020171	Yeats4	1666.28	1815.74	1516.82	0.835374	-0.259505	0.00815904	0.0369853
ENSMUSG00000029173	Sepsecs	1800.18	1642.01	1958.36	1.19265	0.254176	0.00815246	0.0369716
ENSMUSG00000022913	Psmg1	1348.24	1464.32	1232.16	0.841459	-0.249035	0.00815267	0.0369716
ENSMUSG00000010067	Rassf1	2712.63	2440.75	2984.52	1.22279	0.290177	0.00814495	0.0369517
ENSMUSG00000038766	Gabpb2	3913.96	3547.81	4280.12	1.20641	0.270724	0.00814301	0.0369505
ENSMUSG00000031312	Itgb1bp2	11765.9	10787.2	12744.6	1.18146	0.240567	0.00813721	0.0369317
ENSMUSG00000020346	Mgat1	5754.17	5321.13	6187.21	1.16276	0.217556	0.00812838	0.0369
ENSMUSG00000086040	Wipf3	1758.37	1639.2	1877.55	1.1454	0.195854	0.00812857	0.0369
ENSMUSG00000052496	Pkdrej	551.066	486.201	615.932	1.26683	0.341219	0.00811109	0.0368358
ENSMUSG00000023074	Mospd1	3712.77	3985.47	3440.07	0.863153	-0.212311	0.00809864	0.0367868
ENSMUSG00000031782	Coq9	16948.3	15658.4	18238.2	1.16476	0.220029	0.00809214	0.0367648
ENSMUSG00000038884	A230050P20Rik	787.511	701.162	873.86	1.2463	0.317656	0.00808313	0.0367366
ENSMUSG00000036990	Otud4	8881.1	8214.7	9547.5	1.16225	0.216916	0.00808427	0.0367366
ENSMUSG00000052299	Ltn1	3900.76	3605.07	4196.44	1.16404	0.219137	0.00806614	0.0366693
ENSMUSG00000065954	Tacc1	7709.85	7116.32	8303.37	1.16681	0.222567	0.00805616	0.0366314
ENSMUSG00000028825	Rhd	278.929	334.651	223.206	0.666982	-0.58428	0.0080413	0.0365713
ENSMUSG00000027665	Pik3ca	5671.74	5180.67	6162.82	1.18958	0.250451	0.00803367	0.0365441
ENSMUSG00000068299	1700019G17Rik	185.775	210.335	161.215	0.766466	-0.383706	0.00799945	0.0363959
ENSMUSG00000002279	Lmf1	1836.04	2012.17	1659.9	0.824932	-0.277654	0.00799667	0.0363908
ENSMUSG00000031723	Txnl4b	464.718	513.724	415.713	0.809216	-0.305403	0.00799468	0.0363892
ENSMUSG00000048240	Gng7	51.4106	67.8086	35.0126	0.516346	-0.953591	0.00799084	0.0363792
ENSMUSG00000089951	Gm14435	108.574	87.607	129.542	1.47867	0.564302	0.0079802	0.0363382
ENSMUSG00000025362	Rps26	7879.19	8624.29	7134.08	0.827209	-0.273677	0.00797929	0.0363382
ENSMUSG00000081619	Gm13351	16.6379	8.39641	24.8794	2.96309	1.5671	0.0079564	0.0362447
ENSMUSG00000024334	H2-Oa	5.69917	1.61506	9.78329	6.05754	2.59873	0.00792503	0.0361149
ENSMUSG00000064061	Dzip3	1350.87	1482.22	1219.52	0.822766	-0.281446	0.00792626	0.0361149
ENSMUSG00000002059	Rab34	1265.45	1382.65	1148.25	0.83047	-0.268	0.00790256	0.0360217
ENSMUSG00000068747	Sort1	5579.75	6049.35	5110.16	0.844746	-0.24341	0.00788973	0.0359706
ENSMUSG00000032187	Smarca4	10583.2	11600.7	9565.74	0.824583	-0.278263	0.00788541	0.0359583
ENSMUSG00000043993	2900052L18Rik	242.621	281.407	203.835	0.724343	-0.465255	0.00788534	0.0359583
ENSMUSG00000029636	Wasf3	79.1313	61.3699	96.8927	1.57883	0.658856	0.00788033	0.0359499
ENSMUSG00000010751	Tnfrsf22	255.784	218.024	293.543	1.34638	0.429083	0.00787871	0.0359499
ENSMUSG00000039967	Zfp292	3823.86	3498.99	4148.73	1.18569	0.245728	0.00787956	0.0359499
ENSMUSG00000063535	Zfp773	61.7368	79.5348	43.9389	0.552448	-0.85609	0.00787446	0.0359454
ENSMUSG00000041879	Ipo9	9538.16	10398.1	8678.18	0.834589	-0.260862	0.00785395	0.0358591
ENSMUSG00000051650	B3gnt2	78.1992	59.7049	96.6935	1.61952	0.695569	0.00785152	0.0358555
ENSMUSG00000038605	Samd10	456.767	511.704	401.829	0.785277	-0.348727	0.00784875	0.0358502
ENSMUSG00000028464	Tpm2	5390.8	5886.63	4894.97	0.83154	-0.266142	0.00784442	0.0358378
ENSMUSG00000033306	Lpp	8307.11	7733.24	8880.99	1.14842	0.199646	0.00784252	0.0358365
ENSMUSG00000055725	Paqr3	102.46	79.849	125.071	1.56634	0.647402	0.00779791	0.03564
ENSMUSG00000062785	Kcnc3	24.1173	14.696	33.5386	2.28217	1.1904	0.0077903	0.0356169
ENSMUSG00000022016	Akap11	4965.85	4540.64	5391.05	1.18729	0.24767	0.00779125	0.0356169
ENSMUSG00000093661	Eif4e3	2613.18	2389.68	2836.67	1.18705	0.247377	0.0077727	0.0355468
ENSMUSG00000004947	Dtx2	888.976	997.083	780.869	0.783153	-0.352634	0.00776871	0.0355359
ENSMUSG00000042082	Arsb	1678.99	1524.11	1833.88	1.20325	0.266934	0.00776687	0.0355348
ENSMUSG00000038292	Ccdc155	22.6416	32.0016	13.2816	0.41503	-1.26871	0.00776504	0.0355338
ENSMUSG00000031490	Eif4ebp1	6602.43	7203	6001.86	0.833244	-0.263189	0.00774077	0.03543
ENSMUSG00000021589	Rhobtb3	3798.02	4097.46	3498.57	0.853839	-0.227963	0.00773851	0.035427
ENSMUSG00000027952	Pmvk	1282.88	1440.85	1124.91	0.78073	-0.357104	0.00773294	0.0354088
ENSMUSG00000029765	Plxna4	3474.69	3190.56	3758.82	1.1781	0.236468	0.00770253	0.0352769
ENSMUSG00000040850	Psme4	11278.2	10303.9	12252.5	1.18911	0.249887	0.00769986	0.0352719
ENSMUSG00000038225	Ccdc111	601.63	662.292	540.968	0.816812	-0.291923	0.00768281	0.0352011
ENSMUSG00000068959	Zfp619	446.007	399.418	492.597	1.23329	0.302509	0.00767206	0.0351591
ENSMUSG00000040033	Stat2	1783.47	1961.82	1605.13	0.818188	-0.289496	0.00766509	0.0351345
ENSMUSG00000022503	Nubp1	1036.68	1130.65	942.72	0.833785	-0.262252	0.00765848	0.0351114
ENSMUSG00000024083	Pja2	18573.9	16986.9	20161	1.18686	0.247147	0.0076513	0.0350858
ENSMUSG00000082515	Gm12902	10.3614	4.96283	15.7599	3.17559	1.66703	0.00764385	0.0350637
ENSMUSG00000052798	Nup107	1950.7	2144.89	1756.51	0.818929	-0.28819	0.00764363	0.0350637
ENSMUSG00000034616	Ssh3	858.904	959.419	758.389	0.790467	-0.339224	0.00764492	0.0350637
ENSMUSG00000069094	Pde7a	2127.49	1899.72	2355.26	1.23979	0.310099	0.0076369	0.0350487
ENSMUSG00000011960	Ccnt1	3621.19	3299.14	3943.25	1.19524	0.257295	0.0076281	0.0350156
ENSMUSG00000036992	Nxt1	567.339	633.834	500.844	0.790182	-0.339743	0.00762441	0.0350059
ENSMUSG00000022223	Sdr39u1	3004.91	2759.36	3250.47	1.17798	0.236315	0.00759811	0.0348952
ENSMUSG00000087177	E130307A14Rik	959.645	1058.47	860.82	0.813268	-0.298197	0.00759871	0.0348952
ENSMUSG00000041028	Ghitm	34643.1	31699.8	37586.4	1.1857	0.245737	0.00758999	0.0348696
ENSMUSG00000021990	Spata13	4940.02	4549.03	5331.01	1.1719	0.22885	0.00757735	0.0348187
ENSMUSG00000022818	Cyp2ab1	8.27196	2.47791	14.066	5.67657	2.50502	0.00756582	0.034773
ENSMUSG00000019996	Mtap7	1251.44	1137.07	1365.81	1.20117	0.264443	0.00755614	0.0347356
ENSMUSG00000049488	Tmem67	533.529	473.844	593.214	1.25192	0.32414	0.00754557	0.0346943
ENSMUSG00000050856	Atp5k	16692.2	15243.9	18140.5	1.19002	0.250985	0.00753709	0.0346625
ENSMUSG00000024529	Lox	2375.95	2099.31	2652.59	1.26355	0.337488	0.00752108	0.034596
ENSMUSG00000022773	Ypel1	351.018	387.373	314.663	0.812299	-0.299917	0.007497	0.0344925
ENSMUSG00000034329	Brip1	709.915	648.889	770.941	1.18809	0.248649	0.0074874	0.0344554
ENSMUSG00000022354	Ndufb9	27708.8	25351.5	30066.1	1.18597	0.246064	0.00748111	0.0344336
ENSMUSG00000018900	Slc22a5	2213.37	2023.34	2403.41	1.18784	0.248344	0.00747611	0.0344178
ENSMUSG00000064246	Chi3l1	15.7597	20.622	10.8973	0.528432	-0.920211	0.00747147	0.0344036
ENSMUSG00000037007	Zfp113	804.31	875.174	733.447	0.838058	-0.254877	0.00746809	0.0343951
ENSMUSG00000028803	Nipal3	1848.72	1677.94	2019.5	1.20356	0.267306	0.0074566	0.0343494
ENSMUSG00000018378	Cuedc1	4264.8	3945.07	4584.52	1.16209	0.21672	0.00745571	0.0343494
ENSMUSG00000028999	Rint1	1723.79	1900.03	1547.55	0.81449	-0.296032	0.00744283	0.0343002
ENSMUSG00000002475	Abhd3	244.18	204.283	284.078	1.39061	0.47572	0.00742552	0.0342322
ENSMUSG00000059921	Unc5c	61.8653	73.0934	50.6373	0.692775	-0.529541	0.00742653	0.0342322
ENSMUSG00000068921	Dap3	5240.8	5694.4	4787.21	0.840687	-0.25036	0.00742084	0.0342202
ENSMUSG00000013083	2200002J24Rik	6.66615	11.5336	1.79875	0.155958	-2.68077	0.00740846	0.0341703
ENSMUSG00000027180	Fbxo3	7246.91	6605.69	7888.13	1.19414	0.255974	0.00739476	0.0341142
ENSMUSG00000008855	Hdac5	6861.14	7470.13	6252.15	0.836953	-0.256781	0.00736745	0.0339952
ENSMUSG00000020864	Ankrd40	12136.4	11143.9	13129	1.17813	0.236497	0.00734828	0.0339139
ENSMUSG00000022248	Rad1	469.624	531.844	407.403	0.76602	-0.384546	0.00734807	0.0339139
ENSMUSG00000027164	Traf6	1972.84	1821.68	2124	1.16596	0.221518	0.00733358	0.0338601
ENSMUSG00000082454	Gm12183	2333.44	2159.77	2507.12	1.16083	0.215157	0.00733179	0.0338589
ENSMUSG00000060376	Bckdha	4203.04	3831.72	4574.36	1.19381	0.255579	0.00732672	0.0338425
ENSMUSG00000086534	Gm16758	22.4311	31.6747	13.1874	0.416339	-1.26417	0.00731277	0.0337851
ENSMUSG00000043340	6530409C15Rik	45.8289	30.1809	61.4768	2.03694	1.0264	0.00730368	0.0337502
ENSMUSG00000043833	2900005J15Rik	135.612	160.045	111.178	0.694667	-0.525606	0.00729961	0.0337384
ENSMUSG00000000194	Gpr107	4776.99	5215.55	4338.42	0.831824	-0.26565	0.00728473	0.0336767
ENSMUSG00000044522	A730020M07Rik	33.8711	23.1025	44.6397	1.93224	0.950277	0.00727837	0.0336578
ENSMUSG00000032308	Ulk3	1095.22	1194.42	996.02	0.833895	-0.262062	0.00727912	0.0336578
ENSMUSG00000010914	Pdhx	8257.29	7661.44	8853.13	1.15554	0.208573	0.00727196	0.0336387
ENSMUSG00000055538	Zcchc24	6869.95	7503.78	6236.13	0.831066	-0.266966	0.00726396	0.0336087
ENSMUSG00000036598	Ccdc113	28.1028	38.7618	17.4437	0.450024	-1.15193	0.00725425	0.0335708
ENSMUSG00000022858	Tra2b	7718.52	8378.75	7058.3	0.842404	-0.247415	0.0072461	0.0335401
ENSMUSG00000066839	Ecsit	4846.88	4458.98	5234.78	1.17399	0.231417	0.00723427	0.0334923
ENSMUSG00000031661	Nkd1	339.098	384.018	294.179	0.766056	-0.384478	0.00723274	0.0334922
ENSMUSG00000058818	Lilrb3	125.547	98.1668	152.926	1.55782	0.639531	0.0072281	0.0334846
ENSMUSG00000029330	Cds1	87.8513	70.899	104.804	1.47821	0.563849	0.00722958	0.0334846
ENSMUSG00000028996	Rbp7	1124.73	1242.43	1007.04	0.810539	-0.303047	0.00717161	0.03323
ENSMUSG00000096146	Kcnj11	3359.39	3118.36	3600.42	1.15459	0.207376	0.00716001	0.0331832
ENSMUSG00000086117	Gm12065	3.17122	6.34245	0	0	#NAME?	0.0071549	0.0331665
ENSMUSG00000037548	H2-DMb2	30.5907	18.5076	42.6737	2.30574	1.20523	0.0071466	0.0331349
ENSMUSG00000060860	Ube2s	7721.08	8335.28	7106.89	0.852627	-0.230013	0.00711688	0.033004
ENSMUSG00000006019	Dhx34	801.299	893.732	708.867	0.793154	-0.334327	0.00711291	0.0329925
ENSMUSG00000030695	Aldoa	103815	95597.3	112033	1.17193	0.228881	0.00710468	0.0329612
ENSMUSG00000053128	Rnf26	1497.44	1637.44	1357.44	0.829001	-0.270555	0.00709575	0.0329267
ENSMUSG00000044199	S1pr4	30.5476	18.5684	42.5268	2.29027	1.19552	0.00709017	0.0329077
ENSMUSG00000009585	Apobec3	928.338	823.933	1032.74	1.25343	0.325884	0.00707979	0.0328674
ENSMUSG00000054679	Srsf12	28.603	36.6298	20.5761	0.561732	-0.832046	0.00708	0.0328674
ENSMUSG00000066278	Vps37b	3467.37	3810.05	3124.68	0.820115	-0.286103	0.00707489	0.0328575
ENSMUSG00000036206	Sh3bp4	4210.74	3881.3	4540.18	1.16976	0.226209	0.00706622	0.0328241
ENSMUSG00000087041	Gm16295	238.266	265.26	211.271	0.79647	-0.328308	0.00706421	0.0328216
ENSMUSG00000060708	Cno	523.847	454.423	593.271	1.30555	0.384654	0.00706176	0.0328171
ENSMUSG00000030446	Zfp273	248.817	288.538	209.095	0.724672	-0.4646	0.00705812	0.0328071
ENSMUSG00000043122	A530016L24Rik	805.613	912.397	698.829	0.765927	-0.384722	0.00705462	0.0327977
ENSMUSG00000039356	Exosc2	1203.84	1320	1087.68	0.823997	-0.279289	0.00704798	0.0327737
ENSMUSG00000040483	Xaf1	823.896	751.454	896.337	1.1928	0.254357	0.00704482	0.0327659
ENSMUSG00000041264	Uspl1	2498.6	2292.16	2705.05	1.18013	0.238947	0.00702382	0.0326751
ENSMUSG00000036896	C1qc	811.751	744.556	878.947	1.1805	0.239396	0.00702213	0.0326741
ENSMUSG00000022973	Synj1	2785.32	2558.05	3012.58	1.17769	0.235958	0.0070104	0.0326263
ENSMUSG00000028149	Rap1gds1	6161.04	6691.82	5630.26	0.841364	-0.249198	0.0070066	0.0326155
ENSMUSG00000024084	Qpct	717.93	616.3	819.56	1.32981	0.411217	0.00700342	0.0326075
ENSMUSG00000005107	Slc2a9	179.379	146.866	211.893	1.44276	0.528835	0.00699921	0.0325948
ENSMUSG00000085440	D330022K07Rik	319.356	273.258	365.455	1.3374	0.419429	0.00699667	0.0325898
ENSMUSG00000070280	Slc22a14	7.10824	12.9773	1.23921	0.0954905	-3.3885	0.00697769	0.0325083
ENSMUSG00000015202	Cnksr3	2304.73	2105.2	2504.26	1.18956	0.250425	0.00696638	0.0324624
ENSMUSG00000046519	Golph3l	1939.83	2124.05	1755.61	0.826539	-0.274845	0.00696169	0.0324474
ENSMUSG00000049892	Rasd1	288.018	247.502	328.534	1.3274	0.408605	0.00695321	0.0324147
ENSMUSG00000020990	Cdkl1	643.008	721.567	564.448	0.782253	-0.354293	0.006951	0.0324112
ENSMUSG00000034617	Mtrr	1226.84	1348.99	1104.68	0.818889	-0.28826	0.00694755	0.0324019
ENSMUSG00000005506	Celf1	19260.9	20815.3	17706.4	0.850644	-0.233372	0.00694159	0.0323809
ENSMUSG00000026347	Tmem163	169.951	194.84	145.062	0.744518	-0.425621	0.00693563	0.0323599
ENSMUSG00000048440	Cyp4f16	1209.72	1332.55	1086.89	0.815649	-0.29398	0.00693389	0.0323587
ENSMUSG00000062580	Timm17a	7703.91	7029.54	8378.27	1.19187	0.253223	0.00692316	0.0323154
ENSMUSG00000034160	Ogt	19151.8	17474.7	20828.9	1.19194	0.253315	0.00690881	0.0322552
ENSMUSG00000062110	Scfd2	766.694	689.404	843.984	1.22422	0.291866	0.006898	0.0322155
ENSMUSG00000034480	Diap2	2063.58	1880.64	2246.51	1.19454	0.256459	0.00689886	0.0322155
ENSMUSG00000085214	0610005C13Rik	64.4366	79.93	48.9431	0.612325	-0.707631	0.00689435	0.0322081
ENSMUSG00000040701	Ap1g2	688.636	773.879	603.394	0.7797	-0.359008	0.00687608	0.0321295
ENSMUSG00000094936	Rbm4	225.337	194.477	256.197	1.31736	0.397651	0.00687446	0.0321287
ENSMUSG00000022306	Zfpm2	3358.27	3682.14	3034.39	0.824083	-0.279138	0.00687049	0.0321169
ENSMUSG00000041842	Fhdc1	89.7971	109.124	70.4707	0.645787	-0.630869	0.00686376	0.0320922
ENSMUSG00000018470	Kcnab3	191.832	228.741	154.923	0.677288	-0.562159	0.00685125	0.0320405
ENSMUSG00000041789	2700046A07Rik	8.2527	12.8033	3.70207	0.289149	-1.79012	0.00682943	0.0319452
ENSMUSG00000025034	Trim8	3739.78	3438.8	4040.75	1.17504	0.232716	0.00682732	0.0319421
ENSMUSG00000035674	Ndufa3	9769.71	8858.79	10680.6	1.20565	0.269814	0.00678796	0.0317646
ENSMUSG00000070610	Gm13127	1129.13	1269.19	989.07	0.779291	-0.359766	0.00677984	0.0317333
ENSMUSG00000053475	Tnfaip6	186.079	150.691	221.467	1.46967	0.555496	0.00676627	0.0316765
ENSMUSG00000021254	1700020O03Rik	1932.63	1756.08	2109.17	1.20106	0.264312	0.00676519	0.0316765
ENSMUSG00000033161	Atp1a1	102163	94123.9	110202	1.17081	0.227513	0.00676219	0.0316708
ENSMUSG00000037161	4930583H14Rik	28.8448	38.2484	19.4413	0.508289	-0.976278	0.00676187	0.0316708
ENSMUSG00000001707	Eef1e1	827.372	903.859	750.884	0.830754	-0.267507	0.0067583	0.0316659
ENSMUSG00000031613	Hpgd	253.242	282.957	223.528	0.78997	-0.34013	0.00675265	0.0316462
ENSMUSG00000044876	Zfp444	689.938	766.281	613.596	0.800745	-0.320585	0.0067503	0.0316419
ENSMUSG00000038214	Bend3	1760.22	1943.88	1576.56	0.811035	-0.302164	0.0067167	0.031491
ENSMUSG00000092528	Nlrp1c	6.95734	2.28537	11.6293	5.0886	2.34727	0.00670347	0.0314357
ENSMUSG00000020661	Dnmt3a	13117.5	14305.6	11929.4	0.8339	-0.262054	0.00668967	0.0313775
ENSMUSG00000001119	Col6a1	24010.6	22040	25981.3	1.17882	0.237344	0.00666892	0.0312869
ENSMUSG00000032184	Lysmd2	573.818	513.068	634.569	1.23681	0.306626	0.0066481	0.0311958
ENSMUSG00000032115	Hyou1	4252.88	4603.44	3902.33	0.847698	-0.238377	0.00663706	0.0311506
ENSMUSG00000021327	Zkscan3	7515.14	6741.87	8288.41	1.22939	0.297947	0.00663484	0.0311468
ENSMUSG00000006763	Saal1	753.798	824.833	682.763	0.827759	-0.272718	0.00662635	0.0311135
ENSMUSG00000046798	Cldn12	2013.65	1807.13	2220.16	1.22855	0.296962	0.00662021	0.0310913
ENSMUSG00000020776	Fbf1	2304.43	2525.02	2083.84	0.825279	-0.277047	0.00661816	0.0310882
ENSMUSG00000016995	Matn4	127.007	143.225	110.789	0.77353	-0.370471	0.00661451	0.0310777
ENSMUSG00000051728	4930563D23Rik	38.6602	26.2653	51.0552	1.94383	0.958902	0.00661094	0.0310675
ENSMUSG00000058883	Zfp708	238.048	271.015	205.081	0.756713	-0.402182	0.00659152	0.0309828
ENSMUSG00000019960	Dusp6	2379.1	2171.31	2586.88	1.19139	0.252644	0.0065888	0.0309766
ENSMUSG00000060600	Eno3	81832.9	75006.9	88658.8	1.18201	0.24124	0.00658791	0.0309766
ENSMUSG00000006442	Srm	1215.06	1340.84	1089.28	0.812392	-0.299753	0.00658783	0.0309766
ENSMUSG00000022332	Khdrbs3	4496.84	4931.51	4062.18	0.82372	-0.279775	0.00657506	0.0309317
ENSMUSG00000035456	Prdm8	34.2345	25.2782	43.1908	1.70862	0.772832	0.00656961	0.0309126
ENSMUSG00000028479	Gne	2531.29	2771.64	2290.93	0.82656	-0.274809	0.00656121	0.0308796
ENSMUSG00000033964	Zbtb41	2627.48	2377.92	2877.05	1.2099	0.274889	0.00655339	0.0308494
ENSMUSG00000027652	Ralgapb	4980.07	4552.92	5407.22	1.18764	0.248094	0.00655137	0.0308464
ENSMUSG00000014606	Slc25a11	21276.6	19454.2	23099.1	1.18736	0.247757	0.0065237	0.0307354
ENSMUSG00000036860	Mrpl55	2217.45	2032.84	2402.07	1.18163	0.240782	0.00652428	0.0307354
ENSMUSG00000055980	Irs1	1477.95	1369.53	1586.36	1.15832	0.212036	0.0065264	0.0307354
ENSMUSG00000042079	Hnrnpf	14922.5	16146.6	13698.5	0.848382	-0.237214	0.00652592	0.0307354
ENSMUSG00000039621	Prex1	2610.52	2418.38	2802.65	1.15889	0.21275	0.00651915	0.0307274
ENSMUSG00000029638	Glcci1	93.7053	75.3701	112.041	1.48654	0.571958	0.0065151	0.0307148
ENSMUSG00000037624	Kcnk2	508.614	440.46	576.769	1.30947	0.388984	0.00648517	0.0305802
ENSMUSG00000052429	Prmt1	7395.52	8013.14	6777.91	0.84585	-0.241525	0.0064755	0.0305412
ENSMUSG00000036989	Trim3	3175.31	2889.41	3461.21	1.19789	0.260499	0.00647306	0.0305361
ENSMUSG00000062761	Zfp512	2636.53	2863.43	2409.63	0.841521	-0.248928	0.00647042	0.0305302
ENSMUSG00000022099	Epb4.9	412.299	366.549	458.05	1.24963	0.321501	0.00646809	0.0305257
ENSMUSG00000094377		4.12739	7.91488	0.339897	0.042944	-4.5414	0.00646552	0.0305201
ENSMUSG00000002718	Cse1l	8073.31	8807.24	7339.38	0.833335	-0.263031	0.00642938	0.0303559
ENSMUSG00000021716	Srek1ip1	1989.24	2160.38	1818.1	0.841566	-0.248851	0.00640432	0.0302441
ENSMUSG00000039298	Cdk5rap2	2758.41	3013.29	2503.53	0.83083	-0.267375	0.00637548	0.0301193
ENSMUSG00000042498	D330045A20Rik	60.5094	75.5845	45.4343	0.601106	-0.73431	0.00637653	0.0301193
ENSMUSG00000026502	Pppde1	4146.36	4535.23	3757.49	0.828512	-0.271405	0.00636406	0.0300732
ENSMUSG00000070282	3000002C10Rik	201.495	230.466	172.525	0.748592	-0.417749	0.00636163	0.0300681
ENSMUSG00000027513	Pck1	10.38	17.6017	3.15821	0.179426	-2.47854	0.00635975	0.0300656
ENSMUSG00000031512	1700018L24Rik	11.665	17.7087	5.6212	0.317425	-1.65551	0.00628022	0.029696
ENSMUSG00000002204	Napsa	37.19	26.64	47.7399	1.79204	0.841604	0.00627162	0.0296616
ENSMUSG00000056268	Dennd1b	2828.02	2582.38	3073.66	1.19024	0.251256	0.00626234	0.0296241
ENSMUSG00000000915	Hip1r	3496.58	3262.15	3731.01	1.14373	0.193744	0.00625546	0.0295979
ENSMUSG00000027531	Impa1	3194.89	3453.11	2936.66	0.85044	-0.233718	0.00624995	0.0295781
ENSMUSG00000027086	Fastkd1	3062.34	3360.16	2764.53	0.822736	-0.281498	0.00624755	0.0295731
ENSMUSG00000015357	Clpx	6011.73	5495.33	6528.14	1.18794	0.248466	0.00624345	0.02956
ENSMUSG00000020611	Gna13	4283.25	3887.54	4678.96	1.20358	0.267331	0.00622497	0.0294788
ENSMUSG00000027932	Slc27a3	256.406	294.675	218.136	0.740259	-0.433898	0.00621436	0.0294348
ENSMUSG00000030826	Bcat2	3549.05	3861.86	3236.24	0.838001	-0.254976	0.00620483	0.029396
ENSMUSG00000051721	BC068281	524.763	591.599	457.928	0.774051	-0.369499	0.00619514	0.0293564
ENSMUSG00000079620	Muc4	19.5758	10.999	28.1526	2.55956	1.3559	0.00618298	0.0293066
ENSMUSG00000031731	Ap1g1	4406.01	4021.72	4790.3	1.19111	0.252303	0.00618083	0.0293066
ENSMUSG00000033216	Eefsec	681.957	766.308	597.606	0.779852	-0.358728	0.00618331	0.0293066
ENSMUSG00000025531	Chm	2171.82	1978.4	2365.24	1.19553	0.25765	0.00616601	0.0292433
ENSMUSG00000045382	Cxcr4	443.448	380.861	506.034	1.32866	0.409969	0.00614579	0.0291537
ENSMUSG00000020114	Cand1	6263.25	6808.71	5717.8	0.839776	-0.251923	0.00614061	0.0291354
ENSMUSG00000010453	Kansl3	8075.21	8730.97	7419.45	0.849785	-0.23483	0.00612282	0.0290571
ENSMUSG00000029299	Abcg3	59.7936	78.7962	40.791	0.517677	-0.949875	0.00611527	0.0290276
ENSMUSG00000083538	Gm16016	22.5574	31.9378	13.1771	0.412585	-1.27724	0.00611228	0.0290196
ENSMUSG00000020234	4930404N11Rik	45.0868	57.4505	32.723	0.569587	-0.812013	0.00610548	0.0289935
ENSMUSG00000045980	Tmem104	855.019	783.575	926.464	1.18235	0.241663	0.00609945	0.0289711
ENSMUSG00000000296	Tpd52l1	243.81	278.509	209.11	0.750819	-0.413463	0.00609735	0.0289673
ENSMUSG00000002020	Ltbp2	597.936	465.334	730.538	1.56992	0.650694	0.00607715	0.0288775
ENSMUSG00000001424	Snd1	7875.97	8648.58	7103.35	0.821332	-0.283963	0.00607454	0.0288713
ENSMUSG00000024759	Atl3	4958.54	4528.55	5388.53	1.1899	0.25084	0.00607054	0.0288585
ENSMUSG00000038068	Rnf144b	1271.12	1147.1	1395.14	1.21623	0.282415	0.00605845	0.0288072
ENSMUSG00000032679	Cd59a	3034.15	2716.74	3351.56	1.23367	0.302952	0.0060402	0.0287266
ENSMUSG00000028106	Rprd2	3986.49	4355.22	3617.76	0.830671	-0.267651	0.00604006	0.0287266
ENSMUSG00000060441	Trim5	204.952	178.842	231.062	1.29199	0.369594	0.00601608	0.028626
ENSMUSG00000023068	Nus1	4729.82	4271.35	5188.3	1.21468	0.280571	0.00601646	0.028626
ENSMUSG00000063902	Gm7964	7480	8144.27	6815.73	0.836873	-0.256919	0.00598788	0.0285022
ENSMUSG00000053461	Hhipl2	12.9271	18.3191	7.53501	0.41132	-1.28167	0.00598533	0.0284962
ENSMUSG00000047789	Slc38a9	1391.4	1235.93	1546.87	1.25158	0.323753	0.00597085	0.0284393
ENSMUSG00000005374	Tbl2	2045.02	2228.03	1862	0.835716	-0.258916	0.00597208	0.0284393
ENSMUSG00000071226	Cecr2	995.613	898.396	1092.83	1.21642	0.282644	0.00596767	0.0284305
ENSMUSG00000028226	Mmp16	234.697	197.008	272.387	1.38262	0.467401	0.00595542	0.0283782
ENSMUSG00000072872	Rybp	2851.15	3135.9	2566.4	0.818394	-0.289133	0.00594807	0.0283493
ENSMUSG00000029314	Agpat9	2928.18	2607.28	3249.07	1.24616	0.317484	0.00594185	0.0283258
ENSMUSG00000085675	Gm12022	4.54989	0.770156	8.32962	10.8155	3.43503	0.00593965	0.0283214
ENSMUSG00000091549	Gm6548	578.235	652.531	503.94	0.772284	-0.372796	0.00591889	0.0282284
ENSMUSG00000038604	Fam65a	7236.78	6623.36	7850.2	1.18523	0.245166	0.00590636	0.0281748
ENSMUSG00000030522	Mtmr10	1260.17	1139.08	1381.27	1.21262	0.278127	0.00589386	0.0281212
ENSMUSG00000029456	Acad10	435.459	488.137	382.78	0.784167	-0.350768	0.00587763	0.0280498
ENSMUSG00000054484	Tmem62	278.934	230.797	327.071	1.41714	0.502983	0.00587297	0.0280336
ENSMUSG00000058447	Zfp82	153.745	182.659	124.831	0.683411	-0.549175	0.00586411	0.0279973
ENSMUSG00000031585	Gtf2e2	1979.18	2156.31	1802.04	0.835706	-0.258933	0.00584484	0.0279113
ENSMUSG00000074923	Pak6	2489.87	2763.54	2216.2	0.801944	-0.318427	0.00584429	0.0279113
ENSMUSG00000026955	2010317E24Rik	464.896	530.69	399.101	0.752042	-0.411116	0.00584147	0.0279073
ENSMUSG00000035642	1810020D17Rik	1573.27	1408.22	1738.32	1.23441	0.303822	0.00582932	0.0278553
ENSMUSG00000063412	Gm10131	1869.74	2037.24	1702.24	0.83556	-0.259185	0.0058221	0.0278323
ENSMUSG00000039556	Ppp1r3f	339.277	399.601	278.953	0.698079	-0.518539	0.00582326	0.0278323
ENSMUSG00000090877	Hspa1b	179.074	152.37	205.779	1.35052	0.433517	0.00581085	0.0277864
ENSMUSG00000025245	Lztfl1	1963.18	1778.7	2147.65	1.20743	0.271934	0.00581114	0.0277864
ENSMUSG00000039942	Ptger4	443.263	494.497	392.029	0.792784	-0.335	0.00579809	0.0277359
ENSMUSG00000044244	Il20rb	319.407	281.874	356.941	1.26631	0.340636	0.00579354	0.0277202
ENSMUSG00000034485	Uaca	5749.59	5271.35	6227.83	1.18145	0.240558	0.00579257	0.0277202
ENSMUSG00000009418	Nav1	11818.9	12903.8	10733.9	0.83184	-0.265623	0.00579322	0.0277202
ENSMUSG00000022946	Dopey2	2040.45	1859.65	2221.24	1.19444	0.256338	0.00578341	0.0276896
ENSMUSG00000030036	Mogs	1233.07	1363.96	1102.19	0.808084	-0.307423	0.00578039	0.0276811
ENSMUSG00000024430	Cabyr	77.9594	96.2566	59.6621	0.619823	-0.690071	0.0057571	0.0275756
ENSMUSG00000002105	Slc39a13	3071.95	3360.63	2783.26	0.828195	-0.271958	0.0057462	0.0275293
ENSMUSG00000030559	Rab38	11.8896	16.8036	6.9756	0.415125	-1.26838	0.00573291	0.0274716
ENSMUSG00000024974	Smc3	5845.28	6364.36	5326.2	0.836879	-0.25691	0.00572643	0.0274465
ENSMUSG00000030309	Caprin2	1253.72	1378.15	1129.3	0.819432	-0.287305	0.00571482	0.0273968
ENSMUSG00000052369	Tmem106c	1044.83	1123.35	966.309	0.860203	-0.217252	0.00571193	0.0273888
ENSMUSG00000039840	5430411K18Rik	1658.32	1505.46	1811.17	1.20307	0.266716	0.00568899	0.0272848
ENSMUSG00000026788	Zbtb43	2434.35	2184.05	2684.66	1.22921	0.297735	0.00567836	0.0272397
ENSMUSG00000041353	Tmem29	94.3801	72.7035	116.057	1.5963	0.674732	0.00567218	0.0272184
ENSMUSG00000025492	Ifitm3	2513.73	2216.32	2811.14	1.26838	0.342991	0.00567271	0.0272184
ENSMUSG00000038729	Akap2	181.255	148.328	214.182	1.44398	0.530051	0.00566653	0.0272006
ENSMUSG00000025491	Ifitm1	75.4063	58.5535	92.2592	1.57564	0.655938	0.00565775	0.0271643
ENSMUSG00000024844	Banf1	6062.86	6581.11	5544.61	0.842503	-0.247247	0.00565462	0.0271552
ENSMUSG00000086370	B230206F22Rik	436.889	497.194	376.583	0.757416	-0.400842	0.00565281	0.0271524
ENSMUSG00000021120	Pigh	351.04	400.129	301.951	0.754634	-0.406151	0.00564879	0.0271389
ENSMUSG00000089235		96.8193	77.8125	115.826	1.48853	0.573885	0.00561761	0.026995
ENSMUSG00000037440	Vnn1	37.7055	50.6416	24.7695	0.489113	-1.03176	0.00558822	0.0268596
ENSMUSG00000026771	Spopl	2044.7	1844.68	2244.71	1.21686	0.283161	0.00557355	0.0267949
ENSMUSG00000094114		510.087	559.738	460.435	0.822591	-0.281753	0.00556925	0.02678
ENSMUSG00000019762	Iyd	35.652	45.6402	25.6638	0.562308	-0.830566	0.00556508	0.0267658
ENSMUSG00000038526	Car14	7716.61	7016.98	8416.24	1.19941	0.262326	0.00556283	0.0267608
ENSMUSG00000062210	Tnfaip8	3945.28	3557.15	4333.4	1.21822	0.284777	0.00556073	0.0267565
ENSMUSG00000020358	Hnrnpab	19158.7	20692.1	17625.2	0.851785	-0.23144	0.00555281	0.0267242
ENSMUSG00000047714	Ppp1r2	12092.3	11109.5	13075.2	1.17693	0.235033	0.00554433	0.0266892
ENSMUSG00000054499	Dedd2	675.005	599.366	750.644	1.2524	0.324691	0.00552011	0.0265783
ENSMUSG00000041138	Nme8	42.3388	56.938	27.7396	0.48719	-1.03744	0.00551931	0.0265783
ENSMUSG00000066595	Mfsd7b	987.777	878.684	1096.87	1.24831	0.319977	0.00551181	0.0265499
ENSMUSG00000025350	Rdh5	457.788	393.177	522.4	1.32866	0.409975	0.00550707	0.0265328
ENSMUSG00000090211	Gm16050	12.5518	6.71362	18.3899	2.7392	1.45375	0.00550282	0.0265181
ENSMUSG00000003680	Taf6l	619.01	692.447	545.573	0.787892	-0.343931	0.00549507	0.0264866
ENSMUSG00000025964	Adam23	251.47	291.654	211.286	0.72444	-0.465061	0.00549234	0.0264792
ENSMUSG00000054428	Atpif1	10238.6	11027.2	9449.99	0.856968	-0.222686	0.0054826	0.026438
ENSMUSG00000037463	Fbxo27	79.8881	100.762	59.0139	0.585675	-0.771828	0.005475	0.0264071
ENSMUSG00000016386	Mpped2	1917.01	2127.34	1706.68	0.802263	-0.317853	0.00546993	0.0263883
ENSMUSG00000001482	Def8	5114.22	4652.54	5575.9	1.19846	0.261184	0.00546575	0.0263739
ENSMUSG00000039954	Stk32a	101.609	120.961	82.2564	0.680024	-0.556341	0.00546003	0.0263521
ENSMUSG00000030862	Cpxm2	60.6885	41.1336	80.2433	1.9508	0.964063	0.00544822	0.0263008
ENSMUSG00000069835	Sat2	340.818	390.859	290.776	0.743941	-0.42674	0.00544809	0.0263008
ENSMUSG00000051166	Eml5	987.947	1103.96	871.932	0.789822	-0.340401	0.00542049	0.0261784
ENSMUSG00000058897	Col25a1	193.378	160.791	225.964	1.40533	0.490904	0.00541241	0.026145
ENSMUSG00000028804	Csmd2	26.53	17.3095	35.7505	2.06537	1.0464	0.00539305	0.0260572
ENSMUSG00000079941	Gm11273	99.7446	80.8023	118.687	1.46885	0.554691	0.00538411	0.0260208
ENSMUSG00000009470	Tnpo1	9962.25	9025.28	10899.2	1.20763	0.272181	0.00538435	0.0260208
ENSMUSG00000085811	Gm11669	496.165	406.869	585.46	1.43894	0.525009	0.00536793	0.0259528
ENSMUSG00000029147	Ppm1g	6330.3	6920.35	5740.24	0.829473	-0.269733	0.00536608	0.0259495
ENSMUSG00000022568	Scrib	4511.87	4970.61	4053.12	0.815417	-0.294389	0.00535962	0.0259239
ENSMUSG00000028961	Pgd	3976.06	4359.97	3592.16	0.823895	-0.279467	0.00535466	0.0259056
ENSMUSG00000000183	Fgf6	7.1408	2.82008	11.4615	4.06426	2.02299	0.00535305	0.0259035
ENSMUSG00000037266	D4Wsu53e	20769	18809.8	22728.2	1.20832	0.273	0.00535091	0.0258988
ENSMUSG00000096232		2240.1	2034.63	2445.56	1.20197	0.265402	0.00535015	0.0258988
ENSMUSG00000085141	Gm13429	11.8789	18.3511	5.40673	0.294628	-1.76304	0.00533108	0.0258141
ENSMUSG00000026688	Mgst3	6310.18	5725.71	6894.66	1.20416	0.268024	0.00532708	0.0258004
ENSMUSG00000053012	Krcc1	4287.85	4640.94	3934.75	0.847833	-0.238147	0.0053249	0.0257954
ENSMUSG00000042699	Dhx9	14907.1	16213.9	13600.3	0.838803	-0.253596	0.00531491	0.0257527
ENSMUSG00000042742	B630005N14Rik	1584.2	1709.47	1458.92	0.853436	-0.228645	0.00530861	0.0257278
ENSMUSG00000039158	Akna	745.357	673.127	817.588	1.21461	0.280494	0.00528576	0.0256226
ENSMUSG00000090093	Gm14399	173.496	148.951	198.041	1.32958	0.410969	0.00528058	0.0256031
ENSMUSG00000031133	Arhgef6	5946.09	5421.52	6470.65	1.19351	0.255213	0.00524251	0.0254241
ENSMUSG00000038994	Hils1	204.476	168.409	240.543	1.42833	0.514332	0.00523931	0.0254141
ENSMUSG00000085331	Gm11274	31.8085	43.6685	19.9484	0.456815	-1.13032	0.00523882	0.0254141
ENSMUSG00000021318	Gli3	1087	977.077	1196.92	1.225	0.292783	0.0052178	0.0253209
ENSMUSG00000090061	3110047P20Rik	4.05799	0.335154	7.78083	23.2157	4.53703	0.00521259	0.0253012
ENSMUSG00000091507	Gm17194	17.9851	10.5212	25.449	2.41883	1.27431	0.00521044	0.0252963
ENSMUSG00000048707	Tprn	282.62	240.925	324.314	1.34612	0.428806	0.00519186	0.0252116
ENSMUSG00000043872	Zmym1	415.933	461.488	370.378	0.802574	-0.317293	0.00518238	0.0251711
ENSMUSG00000060924	Csmd1	8.69732	3.19814	14.1965	4.43899	2.15023	0.00516896	0.0251114
ENSMUSG00000072066	6720489N17Rik	73.1335	95.2327	51.0342	0.535889	-0.899993	0.00516674	0.0251061
ENSMUSG00000039431	Mtmr7	188.328	219.986	156.67	0.712181	-0.489684	0.00516208	0.025089
ENSMUSG00000028164	Manba	4190.91	4558.98	3822.83	0.838528	-0.254069	0.00515963	0.0250826
ENSMUSG00000023882	Zfp54	192.105	222.29	161.92	0.728418	-0.457161	0.00515576	0.0250693
ENSMUSG00000091994	E130317F20Rik	334.598	389.192	280.004	0.71945	-0.475034	0.00515357	0.0250641
ENSMUSG00000039458	Mtmr12	2337.46	2127.85	2547.08	1.19702	0.259447	0.00514523	0.0250291
ENSMUSG00000022912	Pros1	2150.35	1919.62	2381.08	1.24039	0.310794	0.00513019	0.0249614
ENSMUSG00000072770	Acrbp	248.897	275.453	222.342	0.807187	-0.309024	0.00512992	0.0249614
ENSMUSG00000086231	4732447D17Rik	36.0966	23.5063	48.6869	2.07123	1.05049	0.00512615	0.0249527
ENSMUSG00000040105	Ppapdc2	737.662	816.58	658.743	0.80671	-0.309878	0.00512057	0.0249362
ENSMUSG00000086391	1700042O10Rik	18.916	27.3637	10.4684	0.382565	-1.38622	0.00512165	0.0249362
ENSMUSG00000020395	Itk	15.5075	7.68334	23.3317	3.03667	1.60249	0.00511905	0.0249346
ENSMUSG00000028540	Dph2	485.752	542.516	428.988	0.790738	-0.338728	0.00509224	0.0248094
ENSMUSG00000034037	Fgd5	4941.74	4579.46	5304.01	1.15822	0.211908	0.00508745	0.0247915
ENSMUSG00000006005	Tpr	15337.1	14057.9	16616.4	1.182	0.241232	0.0050755	0.0247387
ENSMUSG00000075028	Prdm11	3446.98	3836.49	3057.48	0.796947	-0.327444	0.00504419	0.0245915
ENSMUSG00000040170	Fmo2	218.657	248.496	188.817	0.759838	-0.396236	0.00503919	0.0245725
ENSMUSG00000024790	Sac3d1	665.733	745.196	586.27	0.786733	-0.346054	0.00502625	0.0245149
ENSMUSG00000028557	Rnf11	9524.18	8675.4	10373	1.19567	0.257825	0.00499199	0.0243531
ENSMUSG00000030604	Zfp626	140.28	119.069	161.491	1.35627	0.439647	0.00498763	0.0243394
ENSMUSG00000038425	Poli	317.504	365.723	269.285	0.73631	-0.441615	0.00498808	0.0243394
ENSMUSG00000026646	Suv39h2	296.551	347.137	245.965	0.708553	-0.497053	0.00498165	0.0243187
ENSMUSG00000026578	4930455F23Rik	695.242	772.095	618.39	0.800924	-0.320262	0.00496266	0.0242314
ENSMUSG00000028862	Map3k6	721.366	662.828	779.904	1.17663	0.234662	0.00495771	0.0242126
ENSMUSG00000037400	Atp11b	4772.48	4346.64	5198.32	1.19594	0.258145	0.00495238	0.0241918
ENSMUSG00000029513	Prkab1	3110.87	2839.15	3382.59	1.19141	0.252671	0.0049464	0.024168
ENSMUSG00000002489	Tiam1	1080.22	1205.98	954.456	0.791437	-0.337453	0.00493563	0.0241207
ENSMUSG00000028024	Enpep	1212.02	1072.58	1351.46	1.26001	0.333438	0.00493202	0.0241084
ENSMUSG00000022543	4930451G09Rik	79.5293	98.8054	60.2533	0.609818	-0.71355	0.00491924	0.0240512
ENSMUSG00000003644	Rps6ka1	924.833	839.744	1009.92	1.20266	0.266225	0.00491386	0.0240302
ENSMUSG00000020163	Uqcr11	16474.2	15142.9	17805.5	1.17583	0.233677	0.00490108	0.0239816
ENSMUSG00000093798		6500.19	7029.26	5971.12	0.849467	-0.235371	0.0049028	0.0239816
ENSMUSG00000029213	Commd8	1920.22	2110.9	1729.54	0.819338	-0.28747	0.00490284	0.0239816
ENSMUSG00000035769	Xylb	63.517	79.7273	47.3066	0.593355	-0.753033	0.00489873	0.0239774
ENSMUSG00000024613	Tcof1	2386.01	2615.39	2156.64	0.824595	-0.278243	0.00489623	0.0239704
ENSMUSG00000006589	Aprt	1103.95	1226.24	981.657	0.800545	-0.320945	0.00489124	0.0239513
ENSMUSG00000029823	Luc7l2	18086.4	16542.6	19630.3	1.18665	0.2469	0.0048782	0.0238927
ENSMUSG00000040321	Zfp770	1786.79	1602.9	1970.68	1.22945	0.298007	0.00487534	0.023884
ENSMUSG00000037426	Depdc5	2268.64	2497.07	2040.21	0.817044	-0.291515	0.00487434	0.023884
ENSMUSG00000027420	Bfsp1	83.6973	106.577	60.8179	0.570649	-0.809325	0.00487063	0.0238715
ENSMUSG00000039620	6430573F11Rik	385.365	441.65	329.08	0.745116	-0.424463	0.0048609	0.0238291
ENSMUSG00000064193	Gm13699	191.302	231.696	150.907	0.651316	-0.618569	0.00485692	0.0238148
ENSMUSG00000020099	Unc5b	6643.15	6052.61	7233.68	1.19513	0.257173	0.00484832	0.0237779
ENSMUSG00000028976	Slc2a5	55.4234	75.0442	35.8026	0.477086	-1.06768	0.00484438	0.0237639
ENSMUSG00000062825	Actg1	18728.9	16935.9	20521.8	1.21173	0.277072	0.00483833	0.0237394
ENSMUSG00000056209	Npm3	1066.88	1183.77	949.98	0.802503	-0.317422	0.00483045	0.023706
ENSMUSG00000025889	Snca	199.872	157.299	242.446	1.54131	0.62416	0.00482448	0.0236856
ENSMUSG00000030218	Mgp	4636.6	4175.3	5097.89	1.22096	0.28802	0.00482523	0.0236856
ENSMUSG00000031668	Eif2ak3	1675.91	1507.03	1844.8	1.22413	0.291753	0.00478535	0.023502
ENSMUSG00000002814	Top3a	826.23	922.525	729.935	0.791236	-0.33782	0.00478569	0.023502
ENSMUSG00000026939	Tmem141	862.466	752.316	972.616	1.29283	0.370532	0.00477892	0.023483
ENSMUSG00000028461	Ccdc107	1256.73	1404.08	1109.39	0.790118	-0.339859	0.0047797	0.023483
ENSMUSG00000005442	Cic	10014.1	11085.5	8942.64	0.806697	-0.309901	0.00477502	0.0234704
ENSMUSG00000053604	Rpia	938.072	827.744	1048.4	1.26658	0.340933	0.0047657	0.0234317
ENSMUSG00000036641	Ccdc148	113.771	140.339	87.2028	0.621374	-0.686466	0.00476609	0.0234317
ENSMUSG00000030471	Zdhhc13	1878.01	2054.42	1701.6	0.828261	-0.271842	0.00475568	0.0233909
ENSMUSG00000021364	Elovl2	58.6116	75.7629	41.4603	0.547237	-0.869761	0.004751	0.023373
ENSMUSG00000035473	Galm	950.483	1040.15	860.813	0.827582	-0.273025	0.00474818	0.0233644
ENSMUSG00000053286	1190005F20Rik	1791.68	1927.69	1655.68	0.858892	-0.219452	0.00474533	0.0233556
ENSMUSG00000021687	Scamp1	3435.27	3108.87	3761.67	1.20998	0.274982	0.00474395	0.0233539
ENSMUSG00000034708	Grn	10435.5	9551.54	11319.5	1.1851	0.245008	0.00472582	0.0232699
ENSMUSG00000021279	Cdc42bpb	14669.7	13527.6	15811.8	1.16886	0.2251	0.00472553	0.0232699
ENSMUSG00000070583	Fv1	703.91	594.271	813.549	1.36899	0.453107	0.00471802	0.0232418
ENSMUSG00000085016	Gm11335	69.7839	88.638	50.9299	0.574583	-0.799412	0.00471578	0.0232359
ENSMUSG00000049307	Fut4	133.972	105.704	162.239	1.53484	0.618091	0.00471276	0.0232262
ENSMUSG00000025314	Ptprj	893.027	806.444	979.61	1.21473	0.280633	0.00470951	0.0232154
ENSMUSG00000031789	Cngb1	69.0376	51.5358	86.5394	1.67921	0.747783	0.00469359	0.023142
ENSMUSG00000037070	Rbmxl1	1632.44	1786.12	1478.76	0.827918	-0.272439	0.00468927	0.0231259
ENSMUSG00000014837	4931428F04Rik	603.079	683.06	523.098	0.765815	-0.384932	0.00468776	0.0231246
ENSMUSG00000029134	Plb1	130.748	154.915	106.582	0.688005	-0.539508	0.00468797	0.0231246
ENSMUSG00000074582	Arfgef2	6365.66	5824.55	6906.76	1.1858	0.245864	0.00467332	0.0230626
ENSMUSG00000021594	Srd5a1	243.047	202.293	283.802	1.40292	0.488436	0.00463758	0.0228913
ENSMUSG00000043648	Pld6	106.162	131.128	81.1951	0.619205	-0.691512	0.00462445	0.0228316
ENSMUSG00000024985	Tcf7l2	1463.69	1617.16	1310.22	0.810202	-0.303647	0.0046233	0.022831
ENSMUSG00000036957	Lrfn3	100.675	125.137	76.2119	0.609027	-0.715423	0.00462206	0.02283
ENSMUSG00000041974	2310008H04Rik	561.248	621.273	501.222	0.806766	-0.309778	0.00462024	0.0228261
ENSMUSG00000031478	Nek3	301.729	337.686	265.772	0.787039	-0.345492	0.00461728	0.0228166
ENSMUSG00000092062	Gm7664	6.48314	1.8076	11.1587	6.17321	2.62602	0.00460416	0.0227568
ENSMUSG00000024905	Mtl5	382.619	444.315	320.922	0.722286	-0.469358	0.00457814	0.0226333
ENSMUSG00000000751	Rpa1	7605.8	8336.9	6874.71	0.824612	-0.278212	0.00457507	0.0226231
ENSMUSG00000031389	Arhgap4	177.789	147.508	208.07	1.41057	0.496279	0.0045525	0.0225165
ENSMUSG00000019464	Ptger1	2235.32	2065.07	2405.56	1.16488	0.220181	0.00455066	0.0225124
ENSMUSG00000073557	Ppp1r12b	28922.3	26611.3	31233.3	1.17368	0.231043	0.00454942	0.0225113
ENSMUSG00000086841	2410006H16Rik	475.616	535.384	415.848	0.776728	-0.364519	0.0045409	0.0224742
ENSMUSG00000037095	Lrg1	317.864	287.399	348.33	1.21201	0.2774	0.00451803	0.022366
ENSMUSG00000032348	Gsta4	2163.05	2352.41	1973.69	0.839006	-0.253247	0.00450613	0.0223121
ENSMUSG00000028268	Gbp3	707.963	623.628	792.299	1.27047	0.34536	0.00450045	0.022289
ENSMUSG00000002409	Dyrk1b	1689.1	1542.64	1835.57	1.18989	0.250824	0.00449613	0.0222725
ENSMUSG00000029561	Oasl2	608.406	694.155	522.657	0.75294	-0.409393	0.00448239	0.0222094
ENSMUSG00000016946	Kctd5	1813.56	1971.54	1655.59	0.839747	-0.251973	0.00446516	0.022129
ENSMUSG00000072501	Phf20l1	9211.68	8422.52	10000.8	1.18739	0.247797	0.00446145	0.0221156
ENSMUSG00000052406	Rexo4	1604.98	1764.12	1445.85	0.819587	-0.287031	0.00443935	0.0220109
ENSMUSG00000027298	Tyro3	893.111	988.919	797.303	0.806238	-0.310723	0.00443886	0.0220109
ENSMUSG00000020389	Cdkl3	798.672	897.885	699.459	0.779007	-0.360292	0.00443655	0.0220069
ENSMUSG00000030208	Emp1	19345.3	17593.7	21097	1.19912	0.261976	0.00443293	0.0219939
ENSMUSG00000046138	9930021J03Rik	2411.55	2175.16	2647.94	1.21735	0.283746	0.00443002	0.0219843
ENSMUSG00000024228	Nudt12	881.829	783.355	980.304	1.25142	0.323563	0.00441541	0.0219168
ENSMUSG00000046442	Ppm1e	3263.63	3593.88	2933.38	0.816214	-0.29298	0.00441129	0.0219012
ENSMUSG00000051510	Mafg	3584.89	3218.76	3951.03	1.2275	0.295726	0.00440702	0.0218849
ENSMUSG00000046675	D230037D09Rik	811.229	723.876	898.582	1.24135	0.311907	0.00440209	0.0218654
ENSMUSG00000021477	Ctsl	8879.64	7941.87	9817.4	1.23616	0.305862	0.00440078	0.0218637
ENSMUSG00000029386	Tctn2	351.476	395.765	307.186	0.776182	-0.365534	0.00440077	0.0218637
ENSMUSG00000020225	Tmbim4	2589.89	2329.94	2849.84	1.22314	0.290592	0.00439288	0.0218343
ENSMUSG00000037814	Larp1b	2911.92	2700.11	3123.73	1.15689	0.210252	0.00439113	0.0218305
ENSMUSG00000017485	Top2b	10511.9	11600.6	9423.11	0.812292	-0.29993	0.00438942	0.0218269
ENSMUSG00000030678	Maz	8532.69	9252.72	7812.66	0.844364	-0.244063	0.00438204	0.0217951
ENSMUSG00000021196	Pfkp	10076.9	11047.1	9106.71	0.824353	-0.278665	0.0043686	0.0217331
ENSMUSG00000017548	Suz12	5684.16	6212.37	5155.95	0.829949	-0.268905	0.00436355	0.0217129
ENSMUSG00000086495	Gm13778	65.183	83.0754	47.2905	0.569248	-0.81287	0.00436314	0.0217129
ENSMUSG00000038811	Gngt2	750.65	652.855	848.444	1.29959	0.378056	0.00436066	0.0217083
ENSMUSG00000031433	Rbm41	830.907	737.409	924.404	1.25358	0.326058	0.00435969	0.0217083
ENSMUSG00000058173	BC017612	578.208	509.041	647.376	1.27175	0.34682	0.00434973	0.0216636
ENSMUSG00000001016	Ilf2	4359.6	4731.57	3987.64	0.842772	-0.246785	0.00434143	0.0216271
ENSMUSG00000020843	Timm22	1814.21	1975.96	1652.46	0.83628	-0.257941	0.00432265	0.0215384
ENSMUSG00000042348	Arl15	1422.14	1259.85	1584.43	1.25763	0.330713	0.00431235	0.0214919
ENSMUSG00000000787	Ddx3x	29285.6	26661.5	31909.7	1.19685	0.259237	0.00431057	0.0214879
ENSMUSG00000026011	Ctla4	13.0955	5.91837	20.2727	3.42538	1.77626	0.00430736	0.0214767
ENSMUSG00000029925	Tbxas1	109.206	86.9046	131.508	1.51324	0.597642	0.00430682	0.0214767
ENSMUSG00000016262	Sertad4	1472.79	1289.62	1655.96	1.28407	0.360726	0.00430386	0.0214689
ENSMUSG00000070565	Rasal2	5521.83	5072.88	5970.77	1.177	0.235112	0.00430077	0.0214583
ENSMUSG00000021109	Hif1a	17372.7	15911.2	18834.2	1.18371	0.243311	0.00428123	0.0213657
ENSMUSG00000020376	Rnf130	2261.12	2028.63	2493.61	1.22921	0.297727	0.00427895	0.0213591
ENSMUSG00000044528	Tram1l1	82.4383	100.838	64.0391	0.635072	-0.655009	0.00427219	0.0213301
ENSMUSG00000032216	Nedd4	82076.1	89288.3	74864	0.838453	-0.254198	0.00427038	0.0213259
ENSMUSG00000028262	Clca2	42.1953	53.7909	30.5997	0.568864	-0.813844	0.00425829	0.0212703
ENSMUSG00000066392	Nrxn3	39.5866	53.1803	25.9929	0.488768	-1.03278	0.00425792	0.0212703
ENSMUSG00000039987	Phtf2	9791.86	8895.41	10688.3	1.20155	0.264898	0.00423871	0.0211821
ENSMUSG00000091472	Gm3739	139.086	106.689	171.483	1.60732	0.684655	0.00422629	0.0211248
ENSMUSG00000021340	Gpld1	1617.77	1456.28	1779.26	1.22178	0.28899	0.00422556	0.0211248
ENSMUSG00000021311	Mtr	3309.75	3048.28	3571.21	1.17155	0.228416	0.00422074	0.0211065
ENSMUSG00000067352	Gm14149	131.349	102.85	159.849	1.5542	0.636175	0.00421593	0.0210873
ENSMUSG00000019856	Fam184a	596.162	668.405	523.919	0.783836	-0.351377	0.00421426	0.0210837
ENSMUSG00000020692	Nle1	782.029	869.837	694.221	0.798105	-0.32535	0.00419669	0.0210005
ENSMUSG00000082809	Gm14150	447.072	513.323	380.821	0.741875	-0.430752	0.004196	0.0210005
ENSMUSG00000015711	Prune	3929.54	4310.4	3548.68	0.823284	-0.280538	0.00418505	0.0209518
ENSMUSG00000031586	Rbpms	15529.8	17002.9	14056.7	0.826723	-0.274525	0.00418237	0.0209431
ENSMUSG00000096775		50.8478	31.8102	69.8853	2.19695	1.1355	0.00416655	0.0208685
ENSMUSG00000027808	Serp1	4417.07	4790.48	4043.67	0.844105	-0.244506	0.0041629	0.020855
ENSMUSG00000014303	Glis2	2834.34	3134.89	2533.79	0.808256	-0.307115	0.00415068	0.0207985
ENSMUSG00000073910	Mob3b	71.0822	87.9922	54.1722	0.615648	-0.699823	0.00415051	0.0207985
ENSMUSG00000038224	Serpinf2	6.73003	11.7659	1.69417	0.14399	-2.79596	0.00413923	0.0207505
ENSMUSG00000074682	Zcchc3	2106.98	2325.81	1888.14	0.811823	-0.300764	0.00413211	0.0207195
ENSMUSG00000040699	Limd2	1338.05	1462.15	1213.95	0.830248	-0.268386	0.00412984	0.0207128
ENSMUSG00000025332	Kdm5c	8266.79	9044.6	7488.99	0.828006	-0.272287	0.00412139	0.0206751
ENSMUSG00000073617	Hdac4	745.295	643.272	847.319	1.3172	0.397476	0.00411698	0.0206576
ENSMUSG00000095098	Ccdc85b	1308.73	1172.34	1445.11	1.23267	0.301783	0.00409797	0.0205669
ENSMUSG00000030327	Necap1	2631.72	2887.92	2375.52	0.82257	-0.28179	0.00409412	0.0205545
ENSMUSG00000023039	Krt7	105.572	126.115	85.0287	0.674215	-0.56872	0.00409458	0.0205545
ENSMUSG00000004637	Wwox	550.107	617.36	482.853	0.782125	-0.35453	0.00407709	0.020476
ENSMUSG00000055172	C1ra	311.643	258.939	364.348	1.40708	0.492706	0.00406963	0.0204432
ENSMUSG00000066406	Akap13	12339.4	11234.3	13444.5	1.19673	0.2591	0.00406757	0.0204416
ENSMUSG00000031302	Nlgn3	42.2062	54.2674	30.145	0.555489	-0.848169	0.00406839	0.0204416
ENSMUSG00000091617	Gm3752	31.1424	19.1461	43.1387	2.25314	1.17193	0.00406416	0.0204296
ENSMUSG00000078920	Ifi47	147.311	118.422	176.2	1.4879	0.573281	0.00406273	0.020427
ENSMUSG00000056116	H2-T22	967.723	868.141	1067.31	1.22941	0.297972	0.00406126	0.0204243
ENSMUSG00000050211	Pla2g4e	905.626	1014.4	796.851	0.785539	-0.348245	0.00405804	0.0204128
ENSMUSG00000073608	Gm6086	218.707	192.329	245.086	1.27431	0.349715	0.00405513	0.0204027
ENSMUSG00000042155	Klhl23	7351.43	8042.02	6660.85	0.828256	-0.271851	0.00405006	0.0203819
ENSMUSG00000018340	Anxa6	27814.4	30325.1	25303.8	0.834416	-0.261162	0.00404779	0.0203751
ENSMUSG00000048915	Efna5	569.443	648.601	490.285	0.755911	-0.403712	0.0040439	0.0203601
ENSMUSG00000055204	Ankrd17	11625.6	10594.1	12657.2	1.19474	0.256694	0.00404244	0.0203574
ENSMUSG00000062908	Acadm	52051.3	47156.6	56946	1.20759	0.272136	0.00403144	0.0203066
ENSMUSG00000001020	S100a4	81.6869	58.8314	104.542	1.77698	0.82943	0.00401824	0.0202447
ENSMUSG00000063108	Zfp26	1920.76	1741.09	2100.43	1.20639	0.270697	0.00401798	0.0202447
ENSMUSG00000000693	Loxl3	737.574	655.763	819.386	1.24952	0.321368	0.00400919	0.0202121
ENSMUSG00000023087	Ccrn4l	14104.6	12760	15449.1	1.21075	0.275896	0.00400995	0.0202121
ENSMUSG00000042406	Atf4	7679.32	6955.4	8403.24	1.20816	0.272812	0.00399824	0.0201623
ENSMUSG00000034551	Hdx	134.398	109.569	159.227	1.45322	0.539253	0.00399398	0.0201454
ENSMUSG00000049709	Nlrp10	2631.26	2912.71	2349.81	0.806741	-0.309823	0.00399075	0.0201337
ENSMUSG00000082605	Gm16148	20.8229	10.664	30.9818	2.90528	1.53868	0.00398375	0.0201042
ENSMUSG00000078496	Gm13152	446.368	394.35	498.386	1.26382	0.337785	0.003984	0.0201042
ENSMUSG00000072762	4930522L14Rik	120.947	145.943	95.9513	0.657457	-0.605033	0.00398189	0.0201027
ENSMUSG00000021140	Pcnx	11015.7	10088.3	11943	1.18385	0.24348	0.00398062	0.0201009
ENSMUSG00000039782	Cpeb2	3645.69	4007.06	3284.31	0.81963	-0.286955	0.0039795	0.0200998
ENSMUSG00000037553	Zdhhc18	2167.22	1968.69	2365.75	1.20169	0.265062	0.00397729	0.020095
ENSMUSG00000001415	Smg5	6567.1	7195.58	5938.62	0.825314	-0.276984	0.00397763	0.020095
ENSMUSG00000053080	2700081O15Rik	5374.37	5823.26	4925.49	0.84583	-0.24156	0.00397152	0.020074
ENSMUSG00000095832		2178.7	2379.16	1978.25	0.83149	-0.266229	0.00397167	0.020074
ENSMUSG00000025193	Cutc	492.749	426.267	559.231	1.31193	0.391687	0.00396688	0.0200589
ENSMUSG00000085828	Gm15612	176.988	207.812	146.165	0.70335	-0.507686	0.00396668	0.0200589
ENSMUSG00000038550	Gm129	297.561	263.301	331.822	1.26024	0.3337	0.0039587	0.0200267
ENSMUSG00000026020	Nop58	3298.33	3587.21	3009.45	0.83894	-0.25336	0.00395414	0.0200083
ENSMUSG00000084644		5.05714	0.770156	9.34413	12.1328	3.60084	0.00394172	0.0199499
ENSMUSG00000003955	Fam162a	5646.29	6125.83	5166.74	0.843435	-0.245651	0.00391566	0.0198226
ENSMUSG00000073988	Ttpa	41.5417	56.2851	26.7984	0.476118	-1.07061	0.00391043	0.0198006
ENSMUSG00000036856	Wnt4	69.153	83.1716	55.1345	0.6629	-0.593136	0.00389222	0.0197129
ENSMUSG00000038201	Kcna7	103.083	81.5131	124.653	1.52924	0.612815	0.00388646	0.0196892
ENSMUSG00000004931	Apba3	2270.28	2087.5	2453.07	1.17512	0.232812	0.00388664	0.0196892
ENSMUSG00000083813	Gm15502	5.74104	1.22296	10.2591	8.38874	3.06845	0.00388149	0.0196724
ENSMUSG00000069814	E130309D14Rik	64.3229	81.9301	46.7156	0.570188	-0.810491	0.00388155	0.0196724
ENSMUSG00000027365	Trpm7	11530.8	10602.2	12459.4	1.17517	0.23287	0.00386782	0.0196118
ENSMUSG00000051951	Xkr4	37.5631	24.1228	51.0034	2.11432	1.0802	0.00386598	0.0196069
ENSMUSG00000025817	Nudt5	2158.97	2388.04	1929.9	0.808155	-0.307297	0.0038586	0.019574
ENSMUSG00000040855	Reps2	112.229	85.0799	139.378	1.6382	0.712115	0.00384382	0.0195035
ENSMUSG00000085664	4930556N08Rik	10.0917	3.50833	16.6752	4.75302	2.24885	0.00383325	0.0194611
ENSMUSG00000032802	Srxn1	807.242	715.498	898.986	1.25645	0.32935	0.00383458	0.0194611
ENSMUSG00000053907	Mat2a	20522.6	18670	22375.2	1.19846	0.261184	0.00383114	0.0194611
ENSMUSG00000020453	Patz1	2014.72	2215.18	1814.26	0.819012	-0.288043	0.00383415	0.0194611
ENSMUSG00000034220	Gpc1	11509.4	12787.8	10231.1	0.800065	-0.32181	0.0038338	0.0194611
ENSMUSG00000017176	Nt5c3l	3282.19	3605.51	2958.87	0.820654	-0.285155	0.00381501	0.0193839
ENSMUSG00000024030	Abcg1	687.256	778.438	596.074	0.765732	-0.385089	0.0038128	0.0193772
ENSMUSG00000039321	Uts2r	10.1667	4.21778	16.1156	3.82088	1.93391	0.00379331	0.0192825
ENSMUSG00000032329	Hmg20a	5239.38	5694.59	4784.16	0.840124	-0.251325	0.00379256	0.0192825
ENSMUSG00000024330	Col11a2	297.284	325.56	269.008	0.826292	-0.275276	0.00378599	0.0192541
ENSMUSG00000044164	Rnf182	33.2063	46.9507	19.462	0.41452	-1.27049	0.00378545	0.0192541
ENSMUSG00000022347	A1bg	3.03543	0	6.07085	Inf	Inf	0.003779	0.0192274
ENSMUSG00000031907	Zfp90	980.946	1097.85	864.041	0.78703	-0.34551	0.00377884	0.0192274
ENSMUSG00000035189	Ano4	393.283	335.464	451.103	1.34472	0.4273	0.00376077	0.0191435
ENSMUSG00000058446	Znrf2	2590.67	2340.44	2840.9	1.21383	0.279569	0.00374113	0.0190479
ENSMUSG00000022571	Pycrl	1219.43	1359.54	1079.33	0.793892	-0.332985	0.0037347	0.0190195
ENSMUSG00000039908	Slc26a11	547.795	611.205	484.385	0.792508	-0.335503	0.00372461	0.0189725
ENSMUSG00000030994	D7Ertd443e	114.7	89.301	140.099	1.56884	0.6497	0.00371852	0.0189458
ENSMUSG00000009670	Tex11	47.0627	60.7691	33.3563	0.548902	-0.86538	0.00371326	0.0189234
ENSMUSG00000028312	Smc2	3996.03	4396.09	3595.97	0.817992	-0.289842	0.00370811	0.0189015
ENSMUSG00000030265	Kras	5162.32	4701.4	5623.24	1.19608	0.258312	0.00370395	0.0188846
ENSMUSG00000050565	Tor1aip2	3464.79	3185.03	3744.56	1.17567	0.233488	0.00369565	0.0188466
ENSMUSG00000039239	Tgfb2	1989.27	2183.79	1794.74	0.821847	-0.283058	0.00367121	0.0187263
ENSMUSG00000071001	Hrct1	178.636	150.921	206.35	1.36727	0.451293	0.00366314	0.0186895
ENSMUSG00000001998	Ap4e1	1497.53	1332.14	1662.92	1.24831	0.319975	0.00363118	0.0185307
ENSMUSG00000045179	Sox3	4.14297	8.06112	0.224827	0.0278904	-5.16409	0.00362644	0.0185107
ENSMUSG00000004056	Akt2	11972.1	10904.7	13039.5	1.19576	0.257928	0.00361251	0.0184439
ENSMUSG00000051255	Gm6563	1764.66	1935.46	1593.86	0.823506	-0.28015	0.00361094	0.0184401
ENSMUSG00000046275	Tusc5	124.805	94.7552	154.856	1.63427	0.708648	0.00360718	0.0184251
ENSMUSG00000040843	Tiprl	3277.21	3589.36	2965.05	0.826065	-0.275672	0.00360637	0.0184251
ENSMUSG00000003153	Slc2a3	316.601	360.78	272.423	0.755097	-0.405267	0.00359134	0.0183527
ENSMUSG00000025137	Pcyt2	3234.35	3580.92	2887.78	0.806437	-0.310367	0.00359027	0.0183515
ENSMUSG00000046111	5830418K08Rik	1876.7	1709.09	2044.32	1.19614	0.25839	0.00357919	0.018299
ENSMUSG00000028889	Yrdc	1059.64	947.902	1171.38	1.23576	0.305395	0.0035768	0.0182911
ENSMUSG00000021098	4930447C04Rik	45.6509	59.7765	31.5252	0.527384	-0.923075	0.00356259	0.0182226
ENSMUSG00000090841	Myl6	15154	13523.6	16784.4	1.24112	0.311647	0.00355387	0.0181862
ENSMUSG00000037366	Pafah2	1157.14	1276.85	1037.42	0.812481	-0.299594	0.00355466	0.0181862
ENSMUSG00000022475	Hdac7	7318.01	6748.84	7887.18	1.16867	0.22487	0.00354648	0.0181528
ENSMUSG00000030726	Pold3	2081.99	2276.1	1887.89	0.82944	-0.26979	0.00354517	0.0181503
ENSMUSG00000026662	Sephs1	4046.79	4465.1	3628.47	0.812629	-0.299331	0.00352054	0.0180283
ENSMUSG00000027668	Mfn1	24085.9	21851.3	26320.6	1.20453	0.268473	0.00350266	0.0179409
ENSMUSG00000022965	Ifngr2	10615.1	9662.41	11567.8	1.1972	0.259661	0.00349977	0.0179303
ENSMUSG00000030159	Clec1b	109.251	133.485	85.0174	0.636905	-0.65085	0.0034893	0.0178807
ENSMUSG00000034634	Ly6d	23.7659	14.2183	33.3135	2.343	1.22836	0.00348701	0.0178731
ENSMUSG00000048410	Zfp407	1413.73	1273.94	1553.51	1.21945	0.286228	0.00347187	0.0177997
ENSMUSG00000090523	Gypc	5110.32	5631.4	4589.24	0.814938	-0.295238	0.00345681	0.0177266
ENSMUSG00000031165	Was	146.509	112.797	180.221	1.59774	0.676035	0.00345223	0.0177072
ENSMUSG00000028648	Ndufs5	6135.64	5487.17	6784.1	1.23636	0.306095	0.00344891	0.0176942
ENSMUSG00000036564	Ndrg4	48245.4	44026.1	52464.8	1.19167	0.25299	0.00344548	0.0176807
ENSMUSG00000020277	Pfkl	11115.1	12162	10068.3	0.827848	-0.272563	0.00344258	0.01767
ENSMUSG00000028030	Tbck	687.427	603.433	771.421	1.27839	0.354327	0.0034361	0.0176408
ENSMUSG00000027968	Larp7	3922.68	4306.19	3539.16	0.821877	-0.283006	0.00343574	0.0176408
ENSMUSG00000024975	Pdcd4	1304.18	1425.08	1183.27	0.830316	-0.268267	0.00342224	0.0175778
ENSMUSG00000008845	Cd163	123.027	94.1742	151.88	1.61275	0.689526	0.00341442	0.0175417
ENSMUSG00000027249	F2	5.22988	8.9956	1.46416	0.162764	-2.61915	0.00340804	0.017513
ENSMUSG00000020605	Hs1bp3	1132.38	1262.85	1001.9	0.79336	-0.333952	0.00339675	0.017459
ENSMUSG00000024067	Dpy30	1833.65	2034.32	1632.98	0.802715	-0.317041	0.00339472	0.0174526
ENSMUSG00000048277	Syngr2	5219.34	4762.31	5676.37	1.19193	0.253305	0.0033928	0.0174482
ENSMUSG00000083907	Plk-ps1	87.6285	109.948	65.3092	0.594003	-0.751458	0.00339308	0.0174482
ENSMUSG00000042500	Eif2c4	777.302	673.945	880.659	1.30672	0.385953	0.00338346	0.0174068
ENSMUSG00000033629	Ptplad1	2669.89	2929.55	2410.22	0.822728	-0.281512	0.00337444	0.0173645
ENSMUSG00000049588	Ccdc69	1300.93	1420.34	1181.53	0.831868	-0.265574	0.00335637	0.0172755
ENSMUSG00000044636	Csrnp2	1089.87	1208.76	970.972	0.80328	-0.316026	0.00334896	0.0172413
ENSMUSG00000080850	Gm12439	523.779	452.09	595.469	1.31715	0.397417	0.00333982	0.0171983
ENSMUSG00000020235	Fzr1	3867.9	4274.49	3461.31	0.809759	-0.304435	0.00333743	0.01719
ENSMUSG00000052934	Fbxo31	2095.66	1950.33	2241	1.14904	0.200424	0.0033299	0.0171552
ENSMUSG00000015224	Cyp2j9	71.9765	51.28	92.6729	1.80719	0.853751	0.00332668	0.0171426
ENSMUSG00000055305	Zfp93	310.616	353.634	267.597	0.756708	-0.402192	0.00331767	0.0171001
ENSMUSG00000071561	BC100530	42.7173	53.5689	31.8657	0.594855	-0.749391	0.00331604	0.0170957
ENSMUSG00000027803	Wwtr1	10024.3	9164.02	10884.6	1.18776	0.248243	0.00331392	0.0170887
ENSMUSG00000031557	Plekha2	4048.47	4450.52	3646.42	0.819323	-0.287496	0.00331371	0.0170887
ENSMUSG00000045414	1190002N15Rik	3585.83	3920.16	3251.5	0.829429	-0.269809	0.00330585	0.0170551
ENSMUSG00000025650	Col7a1	265.894	315.87	215.918	0.683567	-0.548846	0.0032715	0.0168818
ENSMUSG00000022131	Gpr180	2074.71	1859.22	2290.2	1.23181	0.300775	0.00326757	0.0168654
ENSMUSG00000006378	Gcat	115.802	147.48	84.123	0.570402	-0.809948	0.00326573	0.0168599
ENSMUSG00000051518	Rps19bp1	740.563	830.754	650.372	0.78287	-0.353156	0.00325544	0.0168107
ENSMUSG00000030470	Csrp3	49392.1	44735.9	54048.2	1.20816	0.272813	0.00324683	0.0167701
ENSMUSG00000024220	Zfp523	2563.18	2825.34	2301.02	0.814422	-0.296151	0.00324365	0.0167576
ENSMUSG00000001506	Col1a1	67575.1	61079.6	74070.7	1.21269	0.278211	0.00323673	0.0167258
ENSMUSG00000028072	Ntrk1	21.0722	11.6334	30.511	2.62271	1.39106	0.00322089	0.0166478
ENSMUSG00000044042	Fmn1	235.911	200.23	271.592	1.3564	0.439781	0.00321685	0.0166308
ENSMUSG00000089672	Gp49a	186.659	155.094	218.224	1.40704	0.492665	0.00321602	0.0166304
ENSMUSG00000040451	Sgms1	4384.51	3972.85	4796.16	1.20723	0.271706	0.00321274	0.0166173
ENSMUSG00000032118	Fez1	57.85	40.2206	75.4793	1.87663	0.908146	0.00320159	0.0165635
ENSMUSG00000024725	Ostf1	3271.95	2965.94	3577.95	1.20635	0.270645	0.00319821	0.0165499
ENSMUSG00000022340	Sybu	226.268	182.811	269.726	1.47544	0.561142	0.00319593	0.0165419
ENSMUSG00000081683	Fzd10	11.7015	17.9023	5.50069	0.307262	-1.70246	0.00319057	0.016518
ENSMUSG00000020042	Btbd11	94.9929	76.6647	113.321	1.47814	0.563784	0.00318439	0.0164899
ENSMUSG00000000168	Dlat	26153.3	24101.6	28204.9	1.17025	0.226814	0.0031835	0.0164891
ENSMUSG00000079711	Smok4a	5.06368	1.44748	8.67988	5.99654	2.58413	0.00318153	0.0164828
ENSMUSG00000044341	Gm5601	6522.95	7113.74	5932.16	0.833901	-0.262052	0.00318035	0.0164805
ENSMUSG00000022438	Parvb	14360	13196.9	15523.2	1.17627	0.234224	0.003178	0.0164722
ENSMUSG00000028567	Txndc12	3037.87	3333.81	2741.93	0.82246	-0.281983	0.00316983	0.0164337
ENSMUSG00000020307	Cdc34	4776.32	4382.96	5169.68	1.1795	0.23817	0.00316716	0.0164237
ENSMUSG00000006494	Pdk1	13445.2	14686.6	12203.7	0.830939	-0.267185	0.00316685	0.0164237
ENSMUSG00000066319	Rtp3	78.16	61.1481	95.172	1.55642	0.638229	0.00316536	0.016422
ENSMUSG00000026697	Myoc	22.3981	8.75328	36.043	4.11766	2.04182	0.0031627	0.0164121
ENSMUSG00000078921	Tgtp2	28.1011	17.6337	38.5684	2.1872	1.12909	0.00316035	0.0164038
ENSMUSG00000087556	Gm15764	125.991	101.352	150.63	1.48621	0.57164	0.00315762	0.0163934
ENSMUSG00000057777	Mab21l2	8.69258	13.5627	3.82245	0.281835	-1.82708	0.00315515	0.0163845
ENSMUSG00000088705		5.08706	0.720232	9.45388	13.1262	3.71437	0.00315421	0.0163834
ENSMUSG00000034783	Cd207	6.8678	11.9369	1.79875	0.150688	-2.73036	0.00314674	0.0163484
ENSMUSG00000034910	Pygo1	1618.36	1473.09	1763.63	1.19723	0.259703	0.00314474	0.0163419
ENSMUSG00000034949	Zfr2	609.371	684.574	534.168	0.780293	-0.357912	0.00314093	0.0163259
ENSMUSG00000056214	Pard6g	707.075	792.162	621.988	0.785177	-0.348909	0.00313613	0.0163048
ENSMUSG00000092416	Zfp141	556.172	626.706	485.639	0.774907	-0.367905	0.00313318	0.0162933
ENSMUSG00000022769	Sdf2l1	275.394	315.589	235.199	0.745269	-0.424167	0.00313134	0.0162875
ENSMUSG00000048538	Gm9826	250.17	294.157	206.183	0.700929	-0.51266	0.00312959	0.0162823
ENSMUSG00000038903	Ccdc68	291.437	253.189	329.685	1.30213	0.380871	0.00312222	0.0162477
ENSMUSG00000004837	Grap	707.451	614.923	799.979	1.30094	0.379555	0.00312175	0.0162477
ENSMUSG00000020257	Wdr82	9061.67	9848.33	8275.02	0.840247	-0.251115	0.00312218	0.0162477
ENSMUSG00000020424	Gatsl3	316.26	279.754	352.765	1.26098	0.334548	0.00311044	0.0162014
ENSMUSG00000091754	Gm3636	247.29	286.054	208.525	0.728972	-0.456065	0.00311112	0.0162014
ENSMUSG00000021606	Ndufs6	9672.21	8680.89	10663.5	1.22839	0.29677	0.00310171	0.01616
ENSMUSG00000020284	1810043G02Rik	879.341	984.505	774.177	0.786361	-0.346736	0.00310056	0.0161578
ENSMUSG00000028093	Acp6	1847.86	2022.76	1672.95	0.827061	-0.273935	0.0030995	0.0161561
ENSMUSG00000031112	2610018G03Rik	214.198	245.675	182.721	0.743751	-0.427108	0.00309395	0.0161309
ENSMUSG00000057722	Lepr	1812.78	1619.24	2006.32	1.23905	0.309233	0.00308705	0.0160987
ENSMUSG00000002343	Armc6	759.837	847.172	672.502	0.79382	-0.333117	0.00308434	0.0160884
ENSMUSG00000036959	Bcorl1	1676.27	1860.64	1491.9	0.801818	-0.318654	0.00308295	0.0160849
ENSMUSG00000002221	Paxip1	3013.87	3352.85	2674.89	0.797795	-0.32591	0.00308246	0.0160849
ENSMUSG00000052423	B4galt3	1795.1	1591.87	1998.32	1.25532	0.32806	0.00307256	0.0160383
ENSMUSG00000020319	Wdpcp	496.27	555.489	437.051	0.786786	-0.345957	0.00305108	0.0159299
ENSMUSG00000006731	B4galnt1	342.702	296.25	389.154	1.3136	0.393527	0.00304981	0.015927
ENSMUSG00000060240	Cend1	147.383	113.431	181.335	1.59864	0.676847	0.00304808	0.0159217
ENSMUSG00000022947	Cbr3	81.9419	61.5012	102.383	1.66472	0.735283	0.00304359	0.015902
ENSMUSG00000069806	Cacng7	514.676	448.097	581.254	1.29716	0.375358	0.00303675	0.01587
ENSMUSG00000029552	Tes	573.246	502.363	644.128	1.2822	0.358617	0.00302457	0.0158101
ENSMUSG00000071660	Ttc9c	2284.08	2480.01	2088.14	0.841991	-0.248124	0.00301661	0.0157722
ENSMUSG00000049321	Zfp2	504.42	562.139	446.7	0.794644	-0.331619	0.00301066	0.0157449
ENSMUSG00000014686	Ceacam16	6.87345	1.49039	12.2565	8.22371	3.03979	0.00299574	0.0156705
ENSMUSG00000032666	1700025G04Rik	4336.62	3908.65	4764.59	1.21899	0.285683	0.00299536	0.0156705
ENSMUSG00000026421	Csrp1	11330.3	12347.6	10313	0.835226	-0.259762	0.00299365	0.0156705
ENSMUSG00000052056	Zfp217	2000.93	2220.7	1781.17	0.802075	-0.318191	0.00299559	0.0156705
ENSMUSG00000021697	Depdc1b	296.436	339.236	253.637	0.747671	-0.419524	0.00298443	0.0156261
ENSMUSG00000037872	Darc	10.1071	3.56527	16.649	4.66977	2.22335	0.0029797	0.015605
ENSMUSG00000038268	Ovca2	584.028	657.851	510.204	0.775561	-0.366687	0.0029779	0.0155993
ENSMUSG00000037364	Srrt	8484.22	9242.22	7726.22	0.83597	-0.258477	0.00297433	0.0155843
ENSMUSG00000086233	Gm11816	129.2	105.323	153.076	1.45341	0.539438	0.00297329	0.0155825
ENSMUSG00000027004	Frzb	568.009	634.092	501.925	0.791564	-0.337222	0.00296793	0.0155581
ENSMUSG00000021127	Zfp36l1	10011.5	10983.7	9039.33	0.822973	-0.281083	0.00296407	0.0155416
ENSMUSG00000037379	Spon2	3236.62	2904.34	3568.9	1.22882	0.297272	0.0029573	0.0155097
ENSMUSG00000075420	1110017F19Rik	77.0594	98.0278	56.091	0.572195	-0.805421	0.00295065	0.0154785
ENSMUSG00000041779	Tram2	1399.48	1246.98	1551.97	1.24458	0.315658	0.00294636	0.0154597
ENSMUSG00000052102	Gnpda1	1826.69	1601.91	2051.48	1.28065	0.356876	0.0029454	0.0154586
ENSMUSG00000037795	N4bp2	3650.28	3297.43	4003.12	1.21401	0.27978	0.00294547	0.0154586
ENSMUSG00000022186	Oxct1	27144.5	24735.5	29553.5	1.19478	0.256745	0.00294519	0.0154586
ENSMUSG00000094627		157.256	178.705	135.807	0.759949	-0.396025	0.00294351	0.0154586
ENSMUSG00000052374	Actn2	188621	172187	205056	1.19089	0.252042	0.00294055	0.0154475
ENSMUSG00000087306	A230004M16Rik	75.253	59.3764	91.1296	1.53478	0.61803	0.0029388	0.015442
ENSMUSG00000021090	Lrrc9	45.4891	62.5852	28.393	0.45367	-1.14029	0.00293291	0.0154147
ENSMUSG00000085881	Gm15912	102.505	78.1395	126.87	1.62363	0.699227	0.00292704	0.0153874
ENSMUSG00000057359	Gm17494	212.262	248.857	175.667	0.705894	-0.502477	0.00292539	0.0153824
ENSMUSG00000022445	Cyp2d26	6.1534	11.1774	1.12945	0.101048	-3.30689	0.0029237	0.0153772
ENSMUSG00000063018	2010204K13Rik	72.5901	93.267	51.9133	0.556609	-0.845263	0.00291754	0.0153485
ENSMUSG00000025289	Prdx4	2988.51	3261.17	2715.85	0.832784	-0.263985	0.00291339	0.0153303
ENSMUSG00000044950	Pwwp2a	2027.63	2210.13	1845.13	0.834853	-0.260405	0.00291256	0.0153295
ENSMUSG00000021583	Erap1	2328.4	2101	2555.79	1.21646	0.282693	0.00291029	0.0153212
ENSMUSG00000022210	Dhrs4	4939.6	4464.53	5414.67	1.21282	0.278366	0.00289979	0.0152696
ENSMUSG00000033373	Fntb	1118.57	1257.1	980.03	0.779596	-0.359201	0.00289827	0.0152652
ENSMUSG00000014075	Tctex1d2	436.49	498.42	374.559	0.751493	-0.412168	0.00289202	0.0152359
ENSMUSG00000051592	Ccnb3	7.82005	12.3824	3.25772	0.263094	-1.92635	0.00288485	0.0152018
ENSMUSG00000051236	Msrb3	16383.1	14738.7	18027.4	1.22313	0.290582	0.00288159	0.0151882
ENSMUSG00000003721	Insig2	3558.84	3170.51	3947.17	1.24497	0.316105	0.00287772	0.0151721
ENSMUSG00000070372	Capza1	5603.91	6115.47	5092.35	0.8327	-0.264132	0.00287785	0.0151721
ENSMUSG00000059901	Adamts14	979.972	1131.2	828.747	0.732629	-0.448846	0.00287682	0.0151721
ENSMUSG00000022523	Fgf12	27.3174	15.8833	38.7514	2.43976	1.28674	0.00287263	0.0151554
ENSMUSG00000022178	Jub	1638.73	1786.1	1491.36	0.834981	-0.260185	0.00287076	0.0151491
ENSMUSG00000022639	5330426P16Rik	147.861	125.227	170.495	1.36148	0.44518	0.00285558	0.0150726
ENSMUSG00000032640	Chsy1	3571.39	3942.56	3200.23	0.811712	-0.300959	0.00285474	0.0150717
ENSMUSG00000059412	Fxyd2	15.1144	7.30514	22.9236	3.138	1.64985	0.0028454	0.015026
ENSMUSG00000068551	Zfp467	1363.12	1513.99	1212.26	0.800705	-0.320657	0.0028362	0.014981
ENSMUSG00000030782	Tgfb1i1	5971.88	6536.78	5406.97	0.827162	-0.273759	0.0028244	0.0149222
ENSMUSG00000044934	Zfp367	4469.51	4896.77	4042.26	0.825495	-0.276668	0.00282392	0.0149222
ENSMUSG00000019173	Rab5c	4831.86	4380.43	5283.29	1.20611	0.270362	0.00281834	0.0148973
ENSMUSG00000052712	BC004004	5934.63	5425.67	6443.58	1.18761	0.24806	0.00281606	0.0148888
ENSMUSG00000056724	Nbeal2	1738.41	1974.24	1502.58	0.761093	-0.393855	0.00281595	0.0148888
ENSMUSG00000039062	Anpep	1964.25	1775.88	2152.62	1.21214	0.277561	0.0028135	0.0148824
ENSMUSG00000018507	Trpv2	416.07	349.487	482.654	1.38103	0.46575	0.00281103	0.0148729
ENSMUSG00000037638	Zbtb42	706.442	620.589	792.294	1.27668	0.352396	0.00279594	0.0147966
ENSMUSG00000070576	Mn1	1056.35	940.41	1172.28	1.24656	0.317955	0.00279021	0.0147698
ENSMUSG00000030549	Rhcg	7.67549	13.7823	1.56874	0.113823	-3.13514	0.00278694	0.014756
ENSMUSG00000028476	Reck	1347.39	1207.5	1487.28	1.2317	0.30065	0.00278613	0.0147552
ENSMUSG00000084835	Gm12352	28.9782	40.5127	17.4437	0.430574	-1.21567	0.00278507	0.0147531
ENSMUSG00000022329	Stk3	1735.73	1912.2	1559.26	0.815429	-0.29437	0.00278289	0.0147451
ENSMUSG00000088185	Scarna2	31.9247	22.7812	41.0682	1.80272	0.850175	0.00278057	0.0147364
ENSMUSG00000059195	Gm12715	9662.24	8837.94	10486.5	1.18654	0.246755	0.00277455	0.014708
ENSMUSG00000026568	Brp44	10433.2	9368.12	11498.2	1.22738	0.295578	0.00277053	0.0146902
ENSMUSG00000009246	Trpm5	138.317	167.559	109.075	0.650969	-0.61934	0.00276703	0.0146751
ENSMUSG00000039585	Myo9a	3488.86	3169.2	3808.52	1.20173	0.26511	0.00276259	0.0146551
ENSMUSG00000059811	Atl2	3745.96	3410.7	4081.22	1.19659	0.258934	0.00275774	0.0146328
ENSMUSG00000035203	Epn1	12840.1	11784	13896.1	1.17923	0.237845	0.00275554	0.0146247
ENSMUSG00000029650	Slc46a3	355.038	300.252	409.825	1.36494	0.448835	0.00275418	0.014621
ENSMUSG00000091931	Moap1	516.596	577.441	455.751	0.789259	-0.341429	0.00274513	0.0145764
ENSMUSG00000074001	Kbtbd5	1196.31	1320.87	1071.74	0.811386	-0.301539	0.00274328	0.0145701
ENSMUSG00000041623	D11Wsu47e	761.018	849.511	672.526	0.791663	-0.337042	0.00273689	0.0145402
ENSMUSG00000048087	Gm4737	872.504	990.399	754.609	0.761924	-0.392282	0.002737	0.0145402
ENSMUSG00000036019	Tmtc2	837.82	731.881	943.759	1.2895	0.366809	0.00273343	0.0145282
ENSMUSG00000030986	Dhx32	3680.69	3319.02	4042.36	1.21794	0.284443	0.00273013	0.0145141
ENSMUSG00000028167	Bdh2	35.2157	46.7024	23.7289	0.508087	-0.976851	0.00272625	0.014497
ENSMUSG00000047146	Tet1	2928.54	2630.6	3226.48	1.22652	0.294566	0.00272427	0.01449
ENSMUSG00000026904	Slc4a10	27.0338	38.3129	15.7547	0.411213	-1.28204	0.00271775	0.0144588
ENSMUSG00000038127	Ccdc50	6903.21	6192.78	7613.65	1.22944	0.298002	0.00271671	0.0144567
ENSMUSG00000025626	Phf6	1357.94	1515.18	1200.69	0.792438	-0.335631	0.00270911	0.0144197
ENSMUSG00000038859	Baiap2l1	1588.93	1425.24	1752.61	1.22969	0.298293	0.00270455	0.0143989
ENSMUSG00000094483	Purb	14865.9	13543.8	16187.9	1.19522	0.257279	0.00270365	0.0143976
ENSMUSG00000022299	Slc25a32	686.493	598.335	774.652	1.29468	0.372595	0.00269778	0.0143708
ENSMUSG00000038797	Zscan2	438.209	496.896	379.523	0.763787	-0.388757	0.00269798	0.0143708
ENSMUSG00000057706	Mex3b	1029.67	1150.27	909.071	0.790313	-0.339505	0.00269181	0.0143449
ENSMUSG00000028051	Hcn3	26.4585	39.7455	13.1715	0.331396	-1.59337	0.00269081	0.014343
ENSMUSG00000040028	Elavl1	5602.44	6100.27	5104.61	0.836784	-0.257073	0.00268975	0.0143408
ENSMUSG00000061833	Gm6311	127.279	104.956	149.601	1.42536	0.51133	0.00268235	0.0143063
ENSMUSG00000004462	Tbccd1	897.152	995.1	799.205	0.803141	-0.316276	0.00268122	0.0143063
ENSMUSG00000061666	Gdpd1	1237.86	1374.07	1101.65	0.801739	-0.318795	0.00268206	0.0143063
ENSMUSG00000033847	Pla2g4c	60.7292	79.4176	42.0408	0.529365	-0.917666	0.00268264	0.0143063
ENSMUSG00000054836	2610002I17Rik	281.12	321.864	240.376	0.746824	-0.42116	0.00267931	0.0143024
ENSMUSG00000019122	Ccl9	113.303	86.8259	139.78	1.60989	0.686962	0.00267363	0.0142755
ENSMUSG00000051444	Bbs12	299.148	344.713	253.583	0.735634	-0.442941	0.00266612	0.0142388
ENSMUSG00000037894	H2afz	1064.93	1183.01	946.847	0.800372	-0.321258	0.00265789	0.0141983
ENSMUSG00000027959	Sass6	650.215	735.803	564.627	0.767363	-0.38202	0.00265771	0.0141983
ENSMUSG00000052889	Prkcb	98.4694	73.3783	123.56	1.68388	0.751792	0.00265424	0.0141856
ENSMUSG00000018126	Baiap2l2	21.1509	30.3693	11.9326	0.392915	-1.34771	0.00265353	0.0141853
ENSMUSG00000026980	Ly75	375.787	431.091	320.484	0.743426	-0.42774	0.00263483	0.0140887
ENSMUSG00000067215	Usp51	18.5376	29.42	7.65514	0.260202	-1.9423	0.0026346	0.0140887
ENSMUSG00000040621	Gemin8	336.448	388.776	284.12	0.730807	-0.452439	0.00263208	0.0140808
ENSMUSG00000025504	Eps8l2	81.3827	58.9913	103.774	1.75914	0.814872	0.00263087	0.0140777
ENSMUSG00000044566	Cage1	98.7998	121.905	75.6945	0.62093	-0.687497	0.00261473	0.0139947
ENSMUSG00000040328	Olfr56	17.6496	9.74014	25.5591	2.6241	1.39183	0.00260878	0.0139662
ENSMUSG00000026208	Des	75412.5	69822.1	81002.9	1.16013	0.21429	0.00260599	0.0139547
ENSMUSG00000005802	Slc30a4	2594.97	2345.12	2844.82	1.21308	0.278677	0.00260113	0.013932
ENSMUSG00000071253	Slc25a16	2634.9	2401.04	2868.75	1.19479	0.25676	0.00259509	0.0139031
ENSMUSG00000089375	Snord107	3.44802	0.360116	6.53593	18.1495	4.18186	0.00258754	0.013866
ENSMUSG00000044496	2510039O18Rik	3359.1	3059.25	3658.95	1.19603	0.258252	0.00257712	0.0138135
ENSMUSG00000037465	Klf10	3503.77	3177.68	3829.87	1.20524	0.269324	0.00257216	0.0137902
ENSMUSG00000027574	Nkain4	161.809	190.571	133.046	0.698143	-0.518406	0.00256908	0.013777
ENSMUSG00000028988	Ctnnbip1	3442.14	3135.17	3749.11	1.19582	0.258004	0.00256836	0.0137765
ENSMUSG00000004558	Ndrg2	39902.7	36109	43696.4	1.21012	0.275156	0.00256636	0.0137691
ENSMUSG00000028057	Rit1	2644.23	2883.95	2404.5	0.833752	-0.26231	0.00256393	0.0137594
ENSMUSG00000079015	Serpina1c	3.04492	6.08985	0	0	#NAME?	0.00255962	0.0137396
ENSMUSG00000079470	Utp14b	255.726	295.413	216.039	0.731311	-0.451443	0.00255221	0.0137031
ENSMUSG00000016526	Dyrk3	30.9602	44.006	17.9145	0.407093	-1.29657	0.00254613	0.0136738
ENSMUSG00000027359	Slc27a2	5.50494	10.5602	0.449655	0.0425801	-4.55368	0.00254555	0.0136738
ENSMUSG00000054414	Slc30a7	2160.85	1964.25	2357.45	1.20018	0.263249	0.00254162	0.0136562
ENSMUSG00000020785	Camkk1	185.738	146.753	224.724	1.53131	0.614769	0.00252979	0.013596
ENSMUSG00000025647	Shisa5	2814.61	2497.38	3131.84	1.25405	0.326595	0.00252273	0.0135737
ENSMUSG00000012017	Scarf2	1611.01	1438.24	1783.78	1.24025	0.310636	0.00252435	0.0135737
ENSMUSG00000027176	Cstf3	2573.09	2802.79	2343.4	0.836097	-0.258258	0.00252472	0.0135737
ENSMUSG00000038633	Degs1	8473.52	9336.02	7611.02	0.815232	-0.294717	0.00252371	0.0135737
ENSMUSG00000071724	Gm10345	107.337	133.783	80.8914	0.604644	-0.725842	0.00252505	0.0135737
ENSMUSG00000026715	Serpinc1	27.5812	36.7409	18.4216	0.501392	-0.99599	0.00252422	0.0135737
ENSMUSG00000070803	Cited4	2132.88	1936.63	2329.12	1.20266	0.266235	0.0025176	0.0135535
ENSMUSG00000029246	Ppat	3049.54	2747.72	3351.36	1.21969	0.286513	0.00250837	0.0135071
ENSMUSG00000094942		183.995	215.812	152.179	0.705148	-0.504003	0.00249621	0.0134448
ENSMUSG00000021453	Gadd45g	833.393	730.219	936.567	1.28258	0.359053	0.00248651	0.0133984
ENSMUSG00000021391	Cenpp	658.194	756.121	560.266	0.740975	-0.432504	0.00248699	0.0133984
ENSMUSG00000052512	Nav2	12291.4	13607	10975.7	0.806618	-0.310042	0.00248191	0.0133775
ENSMUSG00000040540	Gm9770	1035.59	1159.19	911.996	0.786753	-0.346017	0.00247467	0.0133418
ENSMUSG00000056515	Rab31	3785.05	3407.96	4162.15	1.2213	0.28842	0.00246714	0.0133044
ENSMUSG00000050587	Lrrc4c	47.8558	33.3569	62.3547	1.86932	0.902512	0.00246108	0.0132749
ENSMUSG00000030041	D6Mm5e	17.9424	26.3157	9.56908	0.363626	-1.45947	0.00245943	0.0132693
ENSMUSG00000040990	Sh3kbp1	20170.8	21883.7	18458	0.843457	-0.245613	0.00245128	0.0132285
ENSMUSG00000044433	Camsap3	122.607	152.944	92.2698	0.603291	-0.729075	0.00245117	0.0132285
ENSMUSG00000056938	Acbd4	970.609	857.464	1083.75	1.26391	0.337889	0.00244906	0.013223
ENSMUSG00000020901	Pik3r5	80.1931	59.9429	100.443	1.67565	0.744719	0.00244321	0.0131965
ENSMUSG00000031629	Mlf1ip	284.919	335.795	234.044	0.696983	-0.520805	0.00244356	0.0131965
ENSMUSG00000033949	Trim36	104.103	77.7843	130.421	1.67671	0.745629	0.00244145	0.0131916
ENSMUSG00000038732	Mboat1	200.817	166.165	235.469	1.41709	0.502926	0.00243835	0.013178
ENSMUSG00000022832	Ropn1	14.699	23.3061	6.09184	0.261384	-1.93576	0.00242133	0.0130893
ENSMUSG00000095385		35.9186	23.1922	48.6449	2.09747	1.06865	0.0024203	0.0130869
ENSMUSG00000066042	Med18	229.222	271.916	186.527	0.685971	-0.54378	0.00241768	0.0130759
ENSMUSG00000037605	Lphn3	266.292	225.357	307.226	1.36329	0.447092	0.00241012	0.0130382
ENSMUSG00000033904	6330503K22Rik	1363.48	1217.91	1509.06	1.23906	0.309245	0.00240898	0.0130352
ENSMUSG00000087231	E230016M11Rik	177.629	140.955	214.303	1.52036	0.604417	0.00240777	0.0130318
ENSMUSG00000035877	Zhx3	2638.44	2360.62	2916.27	1.23538	0.304959	0.00240671	0.0130293
ENSMUSG00000054723	Vmac	487	546.736	427.264	0.78148	-0.355718	0.00239604	0.0129747
ENSMUSG00000015709	Arnt2	136.594	160.202	112.987	0.705279	-0.503735	0.00236628	0.0128167
ENSMUSG00000092486	2610524H06Rik	199.127	240.414	157.841	0.656536	-0.607054	0.00235218	0.0127434
ENSMUSG00000027555	Car13	77.3748	101.582	53.1678	0.523399	-0.934017	0.00234306	0.0126971
ENSMUSG00000086765	Gm11827	43.9991	60.421	27.5773	0.456419	-1.13157	0.00233108	0.0126353
ENSMUSG00000030189	Csda	11871.3	13160	10582.6	0.804146	-0.31447	0.00232506	0.0126058
ENSMUSG00000062480	Acat3	71.9231	96.6393	47.2069	0.488486	-1.03361	0.00231689	0.0125645
ENSMUSG00000028633	Ctps	7476.3	8182.12	6770.48	0.827473	-0.273216	0.00231552	0.0125602
ENSMUSG00000033096	2310001A20Rik	1958.47	1748.21	2168.72	1.24054	0.310967	0.00231359	0.0125528
ENSMUSG00000020143	Dock2	262.146	218.101	306.191	1.4039	0.489437	0.00230477	0.012508
ENSMUSG00000032459	Mrps22	1796.05	2008.11	1584	0.788799	-0.34227	0.00230285	0.0125006
ENSMUSG00000050708	Ftl1	9871.37	10840.6	8902.13	0.821183	-0.284225	0.0023009	0.0124931
ENSMUSG00000051185	Fam174a	1638.92	1454.16	1823.67	1.25411	0.326665	0.00229851	0.0124832
ENSMUSG00000029430	Ran	11407	12485.9	10328.1	0.827182	-0.273724	0.00229186	0.0124501
ENSMUSG00000085088	4931413K12Rik	59.2079	44.6619	73.7539	1.65138	0.723674	0.00228432	0.0124134
ENSMUSG00000019467	Arhgef25	2140.46	1901.61	2379.31	1.25121	0.323326	0.00228453	0.0124134
ENSMUSG00000029322	Plac8	85.3252	63.3631	107.287	1.69322	0.759766	0.00227588	0.0123724
ENSMUSG00000020471	Pold2	2148.45	2420.85	1876.04	0.774953	-0.367819	0.00227166	0.0123525
ENSMUSG00000031805	Jak3	2620.23	2373.61	2866.85	1.2078	0.27238	0.00226055	0.0122951
ENSMUSG00000032363	Adamts7	3569.2	3978.58	3159.83	0.79421	-0.332407	0.00225522	0.0122691
ENSMUSG00000024972	Lgals12	19.2111	29.2925	9.12979	0.311677	-1.68188	0.00225439	0.0122676
ENSMUSG00000038280	Ostm1	1955.07	1751.17	2158.97	1.23288	0.302027	0.00225357	0.0122662
ENSMUSG00000041329	Atp1b2	3642.16	4014.86	3269.46	0.814339	-0.296299	0.00225233	0.0122625
ENSMUSG00000022100	Xpo7	5102.68	5593.15	4612.22	0.824618	-0.278202	0.00224786	0.0122411
ENSMUSG00000046691	Chtf8	5031.59	5525.57	4537.62	0.821205	-0.284186	0.00224474	0.0122271
ENSMUSG00000030600	Lrfn1	97.48	124.072	70.8883	0.57135	-0.807554	0.00224194	0.0122149
ENSMUSG00000035885	Cox8a	12177.6	13300.8	11054.5	0.831115	-0.26688	0.00223645	0.0121879
ENSMUSG00000022641	Bbx	1996.68	1796.82	2196.54	1.22246	0.28979	0.00223517	0.012184
ENSMUSG00000026466	Tor1aip1	6634.63	6001.45	7267.81	1.21101	0.27621	0.0022321	0.0121703
ENSMUSG00000014599	Csf1	1926.29	1715.8	2136.78	1.24536	0.316559	0.00223005	0.0121621
ENSMUSG00000054766	Set	11562.4	12589	10535.8	0.836904	-0.256865	0.00222659	0.0121462
ENSMUSG00000049516	Spty2d1	2385.31	2127.68	2642.93	1.24217	0.31286	0.00222455	0.012138
ENSMUSG00000021704	Mtx3	3380.02	3047.89	3712.15	1.21794	0.284446	0.00222417	0.012138
ENSMUSG00000032507	Fbxl2	147.831	114.233	181.428	1.58822	0.667415	0.00221478	0.0120907
ENSMUSG00000048058	Ldlrad3	1131.46	1009.67	1253.25	1.24124	0.311787	0.00221432	0.0120907
ENSMUSG00000038690	Atp5j2	22812.8	20446	25179.6	1.23152	0.300435	0.00221441	0.0120907
ENSMUSG00000030279	5730419I09Rik	2654.38	2385.97	2922.8	1.22499	0.292774	0.00220787	0.0120619
ENSMUSG00000021285	Ppp1r13b	3635.67	3281.21	3990.13	1.21605	0.282206	0.00220653	0.0120576
ENSMUSG00000055733	Nap1l3	209.886	248.868	170.904	0.686723	-0.542199	0.0022032	0.0120423
ENSMUSG00000020474	Polm	531.832	600.169	463.494	0.772273	-0.372818	0.0022014	0.0120355
ENSMUSG00000050199	Lgr4	4750.42	5228.42	4272.42	0.817153	-0.291321	0.0021921	0.0119876
ENSMUSG00000041684	Bivm	1011.44	1112.6	910.293	0.81817	-0.289527	0.00218516	0.0119525
ENSMUSG00000060373	Hnrnpc	11531.9	12602.7	10461.1	0.830069	-0.268697	0.00217794	0.011916
ENSMUSG00000039617	Gm7488	1490.07	1648.93	1331.22	0.807322	-0.308784	0.00217286	0.0118912
ENSMUSG00000092397	C130080G10Rik	5018.13	4457.43	5578.83	1.25158	0.323751	0.0021699	0.01188
ENSMUSG00000057101	Zfp180	1670.34	1852.56	1488.13	0.803281	-0.316023	0.00216974	0.01188
ENSMUSG00000028197	Col24a1	276.15	313.342	238.959	0.762614	-0.390975	0.00217028	0.01188
ENSMUSG00000028565	Nfia	7951.53	8688.08	7214.98	0.830447	-0.268041	0.00216513	0.0118606
ENSMUSG00000023089	Ndufa5	11812.1	10456.6	13167.5	1.25926	0.332577	0.00216027	0.0118369
ENSMUSG00000032788	Pdxk	1242.8	1138.16	1347.43	1.18387	0.243509	0.00215905	0.0118331
ENSMUSG00000078898	Gm4723	93.2094	67.6635	118.755	1.75508	0.81154	0.00215739	0.0118269
ENSMUSG00000071454	Dtnb	436.852	500.133	373.572	0.746946	-0.420925	0.00215161	0.0117982
ENSMUSG00000032905	Atg12	1935.5	2145.38	1725.62	0.804343	-0.314117	0.00214526	0.0117663
ENSMUSG00000047180	Neurl3	624.835	536.295	713.375	1.33019	0.411633	0.00214439	0.0117662
ENSMUSG00000029860	Zyx	12005.6	10949.7	13061.5	1.19286	0.254424	0.00214472	0.0117662
ENSMUSG00000023452	Pisd	1491.02	1345.3	1636.74	1.21663	0.282892	0.00213914	0.0117414
ENSMUSG00000045180	Shroom2	1354.64	1509.04	1200.24	0.795363	-0.330314	0.00213337	0.0117154
ENSMUSG00000001763	Tspan33	81.1476	102.717	59.5788	0.580031	-0.785797	0.00213387	0.0117154
ENSMUSG00000015605	Srf	13054.6	11766.6	14342.6	1.21892	0.285605	0.00212943	0.0116968
ENSMUSG00000071855	Ccdc112	279.294	324.576	234.011	0.720976	-0.471977	0.00211442	0.0116172
ENSMUSG00000050549	5730508B09Rik	523.617	586.491	460.744	0.785595	-0.348143	0.00210792	0.0115844
ENSMUSG00000047033	Pcdhb15	56.0929	39.3464	72.8393	1.85123	0.888484	0.0020926	0.011503
ENSMUSG00000032044	Rpusd4	798.1	885.046	711.155	0.803523	-0.315588	0.00208859	0.0114838
ENSMUSG00000017837	Nkiras2	3759.53	4140.51	3378.55	0.815974	-0.293405	0.00208472	0.0114654
ENSMUSG00000096039	D830030K20Rik	102.665	76.4727	128.857	1.685	0.752752	0.00208386	0.0114646
ENSMUSG00000051934	Spats2	2262.91	2517.52	2008.3	0.797728	-0.326031	0.00208405	0.0114646
ENSMUSG00000058997	1300010F03Rik	18432.5	16747.3	20117.8	1.20126	0.264547	0.00208109	0.0114561
ENSMUSG00000058806	Col13a1	178.818	214.139	143.498	0.670115	-0.57752	0.00208147	0.0114561
ENSMUSG00000014294	Ndufa2	9220.15	8328.79	10111.5	1.21404	0.279821	0.00207467	0.0114244
ENSMUSG00000033222	Ttf2	1730.84	1927.96	1533.71	0.795506	-0.330056	0.00207247	0.0114151
ENSMUSG00000003273	Car11	120.563	149.275	91.8515	0.615318	-0.700597	0.00206578	0.011381
ENSMUSG00000033653	Vps8	2944.99	3239.71	2650.26	0.818055	-0.289731	0.00206515	0.0113804
ENSMUSG00000026411	Tmem9	1711.09	1893.05	1529.12	0.807756	-0.308009	0.00206368	0.0113752
ENSMUSG00000020900	Myh10	21041.5	23079.2	19003.8	0.823418	-0.280303	0.0020625	0.0113715
ENSMUSG00000047150	1700001C19Rik	18.0763	28.8321	7.32042	0.253898	-1.97768	0.00206127	0.0113675
ENSMUSG00000042705	Commd10	1270.69	1418.33	1123.05	0.791817	-0.336761	0.00205693	0.0113464
ENSMUSG00000050511	Oprd1	78.6691	100.756	56.5827	0.561583	-0.832428	0.00204129	0.0112629
ENSMUSG00000040048	Ndufb10	22646.4	20363.7	24929.1	1.22419	0.291832	0.00203935	0.011255
ENSMUSG00000061371	Zfp873	480.995	543.568	418.422	0.769769	-0.377502	0.00203761	0.0112482
ENSMUSG00000038323	1700066M21Rik	615.906	706.538	525.274	0.743447	-0.427697	0.00203383	0.0112302
ENSMUSG00000019923	Zwint	6428.94	7082.32	5775.55	0.815489	-0.294263	0.00203078	0.0112161
ENSMUSG00000028307	Aldob	15.6319	23.3785	7.88527	0.337287	-1.56795	0.00201915	0.0111547
ENSMUSG00000052085	Dock8	1275.49	1151.26	1399.72	1.21581	0.281917	0.00201808	0.0111515
ENSMUSG00000023041	Krt6b	7.23989	1.75767	12.7221	7.23803	2.8556	0.00201556	0.0111404
ENSMUSG00000048826	Dact2	95.6445	72.2263	119.063	1.64847	0.721124	0.00201464	0.0111382
ENSMUSG00000015839	Nfe2l2	6333.84	5683.91	6983.77	1.22869	0.297121	0.00201448	0.0111382
ENSMUSG00000034959	5031414D18Rik	184.884	221.376	148.392	0.670318	-0.577083	0.00201465	0.0111382
ENSMUSG00000048368	Omd	38.7735	22.8469	54.7	2.39419	1.25954	0.00201298	0.0111372
ENSMUSG00000033981	Gria2	4.79763	9.25535	0.339897	0.0367243	-4.76712	0.00201282	0.0111372
ENSMUSG00000064845		6.80853	1.13027	12.4868	11.0476	3.46566	0.00201128	0.0111334
ENSMUSG00000086769	Gm15587	214.708	180.896	248.521	1.37384	0.45821	0.00200989	0.0111285
ENSMUSG00000000706	Btn1a1	10.6492	15.1282	6.17024	0.407863	-1.29384	0.00200011	0.0110771
ENSMUSG00000021948	Prkcd	1778.78	1972.01	1585.55	0.804024	-0.31469	0.00199617	0.011058
ENSMUSG00000024966	Stip1	10318.9	11365.6	9272.12	0.815803	-0.293707	0.00198796	0.0110153
ENSMUSG00000033016	Nfatc1	2313.63	2098.37	2528.88	1.20516	0.269229	0.00198525	0.0110031
ENSMUSG00000007880	Arid1a	12182.9	13445.6	10920.3	0.812183	-0.300123	0.00198117	0.0109832
ENSMUSG00000041957	Pkp2	11998.8	13110.1	10887.5	0.830467	-0.268005	0.00197853	0.0109713
ENSMUSG00000046191	Pcdhb20	336.473	285.742	387.203	1.35508	0.438376	0.00197771	0.0109695
ENSMUSG00000030177	Ccdc77	1299.47	1438.76	1160.19	0.80638	-0.310469	0.00197757	0.0109695
ENSMUSG00000040415	Dtx3	4674.5	4185.38	5163.62	1.23373	0.303022	0.00197502	0.0109637
ENSMUSG00000063383	Zfp947	260.459	298.382	222.535	0.745804	-0.423131	0.00197556	0.0109637
ENSMUSG00000091639	Gm3756	25.0414	40.7284	9.35436	0.229677	-2.12232	0.00197568	0.0109637
ENSMUSG00000025185	Loxl4	120.489	89.5577	151.42	1.69076	0.757669	0.00197148	0.0109487
ENSMUSG00000000631	Myo18a	22520.7	24923.4	20118	0.807197	-0.309008	0.0019674	0.0109287
ENSMUSG00000031163	Glod5	7.86234	14.4855	1.23921	0.0855482	-3.54712	0.00196524	0.0109195
ENSMUSG00000038383	Pigu	3006.7	3307.8	2705.59	0.81794	-0.289933	0.00196246	0.0109068
ENSMUSG00000052560	Cpne8	437.159	356.999	517.319	1.44908	0.535137	0.00195918	0.0108937
ENSMUSG00000025364	Pa2g4	7482.79	8228.31	6737.27	0.818792	-0.288431	0.00195963	0.0108937
ENSMUSG00000085412	Gm15055	27.7825	15.2915	40.2735	2.63371	1.3971	0.00195745	0.0108871
ENSMUSG00000050103	Agmo	66.4824	46.9798	85.9849	1.83025	0.872041	0.00194948	0.0108455
ENSMUSG00000052572	Dlg2	108.397	127.301	89.4935	0.703005	-0.508394	0.00194596	0.0108287
ENSMUSG00000087242	C78197	40.736	26.7926	54.6795	2.04084	1.02917	0.00194413	0.0108212
ENSMUSG00000021772	Nkiras1	1867.39	1666.7	2068.08	1.24083	0.311301	0.00193588	0.010778
ENSMUSG00000022827	Rabl3	971.847	1072.39	871.305	0.812489	-0.29958	0.00193515	0.0107766
ENSMUSG00000029263	Pigg	1130.5	1002.82	1258.17	1.25463	0.327265	0.00193088	0.0107555
ENSMUSG00000079144	A130010J15Rik	716.48	806.625	626.335	0.776488	-0.364965	0.00193079	0.0107555
ENSMUSG00000031938	4931406C07Rik	1226.84	1365.83	1087.85	0.796469	-0.328309	0.00192728	0.0107409
ENSMUSG00000028581	Laptm5	1178.64	1037.34	1319.95	1.27244	0.3476	0.00192065	0.0107066
ENSMUSG00000031818	Cox4i1	67822.3	60573.9	75070.7	1.23933	0.309555	0.00191921	0.0107013
ENSMUSG00000030757	Zkscan2	63.1934	81.4282	44.9587	0.552127	-0.856928	0.00191758	0.0106949
ENSMUSG00000045817	Zfp36l2	2874.16	2572.41	3175.91	1.23461	0.304051	0.00190484	0.0106265
ENSMUSG00000028717	Tal1	743.302	656.374	830.23	1.26487	0.338993	0.0019004	0.0106044
ENSMUSG00000036745	Ttll7	365.22	317.711	412.73	1.29907	0.377484	0.00189613	0.0105855
ENSMUSG00000039850	A730011L01Rik	1366.36	1517.39	1215.32	0.800931	-0.320251	0.00189653	0.0105855
ENSMUSG00000042677	Zc3h12a	259.282	224.954	293.609	1.30519	0.384262	0.00189473	0.0105808
ENSMUSG00000027935	Rab13	807.811	893.498	722.124	0.808199	-0.307218	0.00189408	0.0105798
ENSMUSG00000021493	Pdlim7	4964.59	4460.53	5468.65	1.22601	0.293969	0.00187789	0.0104921
ENSMUSG00000081232	Gm14373	62.2761	41.3228	83.2293	2.01412	1.01015	0.00186556	0.0104258
ENSMUSG00000031540	Myst3	5888.21	5316.41	6460.01	1.21511	0.281085	0.00186193	0.0104081
ENSMUSG00000032575	Manf	2833.75	3098.16	2569.34	0.829313	-0.270012	0.00186179	0.0104081
ENSMUSG00000042549	Gm16516	257.263	215.163	299.362	1.39132	0.476458	0.00185924	0.0103983
ENSMUSG00000032436	Cmtm7	1399.44	1558.82	1240.05	0.795504	-0.33006	0.00185742	0.0103908
ENSMUSG00000056216	Cebpg	2265.89	1963.29	2568.49	1.30826	0.387647	0.00185642	0.0103878
ENSMUSG00000073535	Gm5532	713.18	600.309	826.051	1.37604	0.460527	0.00185512	0.0103832
ENSMUSG00000041235	Chd7	3260.8	2991.13	3530.47	1.18031	0.239168	0.00184994	0.0103568
ENSMUSG00000038763	Alpk3	18445.5	16754.9	20136.2	1.20181	0.265211	0.00184774	0.010347
ENSMUSG00000020650	Bcap29	2276.98	2541.24	2012.72	0.79202	-0.336391	0.00184246	0.0103201
ENSMUSG00000071324	Armc2	353.152	297.14	409.164	1.37701	0.461536	0.00183987	0.0103082
ENSMUSG00000027405	Nop56	3856.8	4241.28	3472.33	0.818698	-0.288596	0.00183955	0.0103082
ENSMUSG00000020212	Mdm1	969.341	1083.02	855.664	0.790074	-0.33994	0.00183529	0.0102877
ENSMUSG00000039043	2610034B18Rik	2100.01	2332.61	1867.41	0.800568	-0.320904	0.00182394	0.0102267
ENSMUSG00000026463	Atp2b4	5234.6	4749.64	5719.56	1.20421	0.268084	0.00182083	0.0102119
ENSMUSG00000030447	Cyfip1	5933.5	5355.48	6511.52	1.21586	0.281979	0.00181184	0.010164
ENSMUSG00000025209	Peo1	1817.1	2026.1	1608.1	0.793694	-0.333346	0.00180978	0.010155
ENSMUSG00000053644	Aldh7a1	2905.77	3207.51	2604.03	0.811852	-0.300712	0.00180504	0.010131
ENSMUSG00000085995	Gm2788	19.6815	29.1037	10.2594	0.352511	-1.50426	0.00180483	0.010131
ENSMUSG00000095654		11.4094	3.34089	19.4779	5.83016	2.54354	0.00180043	0.0101103
ENSMUSG00000063714	1700011J10Rik	451.473	514.619	388.327	0.754593	-0.40623	0.00179598	0.0100878
ENSMUSG00000025478	Dpysl4	146.812	109.977	183.646	1.66986	0.739725	0.00179445	0.0100825
ENSMUSG00000029426	Scarb2	7857.47	7208.78	8506.16	1.17997	0.238753	0.00179458	0.0100825
ENSMUSG00000037640	Zfp60	1215.77	1325.3	1106.24	0.834707	-0.260659	0.00178971	0.0100609
ENSMUSG00000069805	Fbp1	7.14207	12.1402	2.14395	0.1766	-2.50144	0.00178983	0.0100609
ENSMUSG00000058743	Kcnj14	38.6799	26.4613	50.8985	1.92351	0.943738	0.00178388	0.0100326
ENSMUSG00000002250	Ppard	1981.03	1802.25	2159.81	1.1984	0.261109	0.00177985	0.0100125
ENSMUSG00000047757	Fancb	317.553	369.124	265.982	0.720578	-0.472774	0.00176908	0.00995438
ENSMUSG00000036078	Sigmar1	1358.78	1515.93	1201.64	0.792675	-0.3352	0.00176478	0.00993272
ENSMUSG00000006403	Adamts4	1111.85	1000.49	1223.21	1.22261	0.289962	0.00176049	0.00991108
ENSMUSG00000078247	Airn	2544.63	2297.38	2791.89	1.21525	0.281251	0.00175965	0.00990888
ENSMUSG00000018983	E2f2	718.634	831.868	605.399	0.727759	-0.458468	0.00175394	0.00987924
ENSMUSG00000062866	Phactr2	12634.6	13962	11307.1	0.809844	-0.304283	0.00174868	0.0098521
ENSMUSG00000040473	A330021E22Rik	254.751	209.495	300.006	1.43204	0.518075	0.00174434	0.00983016
ENSMUSG00000026398	Nr5a2	210.247	171.209	249.284	1.45602	0.542033	0.00174096	0.00981361
ENSMUSG00000029771	Irf5	226.396	186.744	266.049	1.42468	0.510634	0.00174024	0.00981205
ENSMUSG00000030359	Pzp	46.2526	59.9443	32.5609	0.543187	-0.88048	0.00173986	0.00981205
ENSMUSG00000021255	Esrrb	1249.7	1139.05	1360.34	1.19427	0.256133	0.00173383	0.00978086
ENSMUSG00000051920	Rspo2	18.1811	27.0179	9.34425	0.345854	-1.53176	0.00173314	0.00977947
ENSMUSG00000002944	Cd36	88699.8	80789.4	96610.2	1.19583	0.258009	0.00173137	0.00977201
ENSMUSG00000041415	Dicer1	6309.95	5697.9	6921.99	1.21483	0.280758	0.00172567	0.00974228
ENSMUSG00000020536	Llgl1	3466	3885.24	3046.75	0.784187	-0.350731	0.00172558	0.00974228
ENSMUSG00000066551	Hmgb1	10777.1	11802.7	9751.45	0.826202	-0.275433	0.00171976	0.00971388
ENSMUSG00000037275	Gemin5	2065.67	2313.87	1817.48	0.785474	-0.348365	0.00171799	0.00970637
ENSMUSG00000029108	Pcdh7	7629.88	7097.66	8162.11	1.14997	0.201599	0.00170894	0.00965768
ENSMUSG00000032898	Fbxo21	5315.71	5894.61	4736.81	0.803583	-0.315481	0.0017052	0.00963899
ENSMUSG00000057278	Snrpg	550.375	605.547	495.204	0.817779	-0.290216	0.00170437	0.00963678
ENSMUSG00000020638	Cmpk2	644.43	570.54	718.32	1.25902	0.332299	0.00169413	0.00958135
ENSMUSG00000083012	2810453I06Rik	185.273	146.741	223.805	1.52516	0.608964	0.00168555	0.00953521
ENSMUSG00000036908	Unc93b1	1103.36	978.92	1227.81	1.25425	0.326823	0.00167694	0.00948896
ENSMUSG00000038305	Spats2l	1883.73	2091.77	1675.69	0.801088	-0.319967	0.00166559	0.00942712
ENSMUSG00000087249	Gm16062	58.0003	39.0933	76.9072	1.96727	0.976197	0.00166055	0.009401
ENSMUSG00000027239	Mdk	1720.68	1925.84	1515.52	0.786938	-0.345679	0.00165892	0.00939418
ENSMUSG00000034324	Tmem132c	38.8281	49.5772	28.079	0.56637	-0.820184	0.00165678	0.00938444
ENSMUSG00000050921	P2ry10	9.30937	3.85752	14.7612	3.82661	1.93607	0.00165319	0.00936725
ENSMUSG00000052533	Nup188	3681.18	4089.69	3272.66	0.800222	-0.321527	0.00165332	0.00936725
ENSMUSG00000039956	Mrap	1045.79	1187.83	903.749	0.760842	-0.394332	0.00164767	0.00934001
ENSMUSG00000028403	Zdhhc21	2636.6	2367.36	2905.85	1.22747	0.295684	0.00164243	0.00931271
ENSMUSG00000028127	Abcd3	9947.82	8943.55	10952.1	1.22458	0.292287	0.00164234	0.00931271
ENSMUSG00000021690	Jmy	5057.55	4570.36	5544.74	1.2132	0.278813	0.00164154	0.00931242
ENSMUSG00000023945	Slc5a7	77.2446	100.416	54.0727	0.538484	-0.893024	0.00164081	0.00931066
ENSMUSG00000035614	Fam179b	2109.51	1865.65	2353.37	1.26143	0.335055	0.00163585	0.00928489
ENSMUSG00000021460	Auh	2613.33	2318.11	2908.56	1.25471	0.327357	0.00163397	0.00927663
ENSMUSG00000025616	Usp16	3975.36	3578.17	4372.56	1.22201	0.289254	0.00162768	0.00924329
ENSMUSG00000001280	Sp1	5634.46	5068.84	6200.08	1.22317	0.29063	0.00162313	0.00921981
ENSMUSG00000030532	Hddc3	362.094	416.808	307.379	0.737461	-0.439362	0.00162256	0.00921894
ENSMUSG00000002111	Sfpi1	191.786	155.946	227.627	1.45965	0.545627	0.00161511	0.00917896
ENSMUSG00000000538	Tom1l2	11195.8	10183.7	12208	1.19878	0.261566	0.00161037	0.00915437
ENSMUSG00000051550	Zfp579	1418.43	1558.58	1278.27	0.820155	-0.286031	0.00160426	0.00912199
ENSMUSG00000059734	Ndufs8	8882.33	8062.34	9702.32	1.20341	0.26713	0.0016033	0.00911886
ENSMUSG00000052040	Klf13	4875.97	4416.75	5335.19	1.20794	0.272552	0.00160206	0.00911412
ENSMUSG00000057182	Scn3a	145.866	115.213	176.519	1.53211	0.61552	0.00159964	0.00910269
ENSMUSG00000033917	Gde1	2184.81	2426.57	1943.04	0.800735	-0.320603	0.00159766	0.00909375
ENSMUSG00000028977	Casz1	8196.51	9166.09	7226.93	0.788442	-0.342924	0.00159692	0.00909192
ENSMUSG00000048142	Nat8l	295.664	340.913	250.416	0.734543	-0.44508	0.0015944	0.0090799
ENSMUSG00000048728	Zfp454	138.359	169.541	107.178	0.632164	-0.66163	0.00159386	0.00907912
ENSMUSG00000078901	Gm14440	37.5524	25.0427	50.062	1.99907	0.999326	0.00159142	0.00906756
ENSMUSG00000082988	Gm5903	397.276	451.646	342.905	0.759234	-0.397384	0.00158928	0.00905773
ENSMUSG00000026988	Wdsub1	1837.76	2019.65	1655.87	0.819878	-0.286519	0.00158823	0.00905404
ENSMUSG00000020941	Map3k14	446.049	377.874	514.224	1.36083	0.44449	0.00158752	0.00905232
ENSMUSG00000027951	Adar	3061.2	3409.35	2713.04	0.795766	-0.329584	0.00158636	0.00904806
ENSMUSG00000085208	4632419I22Rik	3834.98	4238.21	3431.75	0.809716	-0.304512	0.00158576	0.00904696
ENSMUSG00000034579	Pla2g3	226.369	266.813	185.926	0.69684	-0.521102	0.00158454	0.00904234
ENSMUSG00000037071	Scd1	440.754	370.393	511.116	1.37993	0.464595	0.00158395	0.00904128
ENSMUSG00000068758	Il3ra	374.579	310.706	438.453	1.41115	0.496873	0.00158019	0.00902438
ENSMUSG00000092947		25.8512	37.5113	14.1912	0.378318	-1.40233	0.00158058	0.00902438
ENSMUSG00000028530	Jak1	11948	10714.3	13181.6	1.23028	0.298987	0.00157931	0.0090218
ENSMUSG00000051343	Rab11fip5	8239.97	9187.15	7292.79	0.793803	-0.333147	0.00157907	0.0090218
ENSMUSG00000015944	Gatsl2	2783.63	3124.42	2442.83	0.78185	-0.355036	0.00157737	0.00901533
ENSMUSG00000024127	Prepl	8730.99	9726.53	7735.46	0.795295	-0.330438	0.00157361	0.00899617
ENSMUSG00000027412	Lpin3	292.791	245.81	339.771	1.38225	0.467019	0.0015663	0.00895669
ENSMUSG00000082896	Gm5844	953.096	1071.08	835.113	0.779693	-0.359022	0.00156598	0.00895669
ENSMUSG00000045664	Cdc42ep2	1568.14	1411.35	1724.94	1.22219	0.289465	0.00156458	0.0089515
ENSMUSG00000052557	Gan	250.672	215.734	285.61	1.3239	0.404792	0.00156317	0.00894573
ENSMUSG00000059149	Mfsd4	1696.16	1528.48	1863.84	1.2194	0.286177	0.00156146	0.00893827
ENSMUSG00000074813	Gm14005	149.832	117.477	182.187	1.55084	0.633048	0.00155748	0.0089192
ENSMUSG00000031103	Elf4	5177.45	5680.87	4674.03	0.822768	-0.281443	0.00155773	0.0089192
ENSMUSG00000018574	Acadvl	44788.4	40375.7	49201.1	1.21858	0.285206	0.00154933	0.00887583
ENSMUSG00000040272	Accs	962.941	1075.57	850.311	0.790567	-0.33904	0.00154935	0.00887583
ENSMUSG00000025204	Ndufb8	23694.2	21150.6	26237.7	1.24052	0.310946	0.0015461	0.00886178
ENSMUSG00000046329	Slc25a23	7380.53	8130.97	6630.1	0.815413	-0.294398	0.0015456	0.00886118
ENSMUSG00000023961	Enpp4	2096.03	1868.42	2323.63	1.24363	0.314558	0.00154188	0.00884213
ENSMUSG00000079225	Gm9531	382.706	450.081	315.331	0.700611	-0.513315	0.00153686	0.00881566
ENSMUSG00000033781	Asb13	848.308	750.061	946.555	1.26197	0.335678	0.00153048	0.00878132
ENSMUSG00000018899	Irf1	899.008	773.036	1024.98	1.32592	0.40699	0.00152949	0.00877792
ENSMUSG00000043557	Mdga1	1330.04	1176.55	1483.53	1.26092	0.334477	0.00151897	0.0087198
ENSMUSG00000025225	Nfkb2	1940.08	1713.7	2166.45	1.2642	0.338223	0.00151749	0.00871357
ENSMUSG00000044737	Klk14	55.5394	37.0681	74.0106	1.99661	0.997555	0.00151626	0.00870877
ENSMUSG00000079523	Tmsb10	7444.34	8117.07	6771.6	0.834242	-0.261463	0.00151606	0.00870877
ENSMUSG00000054823	Whsc1l1	4671.67	4177.99	5165.35	1.23632	0.306056	0.00151519	0.00870713
ENSMUSG00000021932	Rnaseh2b	1797.71	2003.98	1591.45	0.794145	-0.332525	0.00151395	0.00870226
ENSMUSG00000087138	Gm15545	318.285	364.892	271.677	0.74454	-0.425579	0.00151382	0.00870226
ENSMUSG00000063972	Nr6a1	320.393	272.64	368.146	1.3503	0.433281	0.00150121	0.00863351
ENSMUSG00000058927	Gm10053	18100.6	16105.2	20096	1.24779	0.319377	0.0015012	0.00863351
ENSMUSG00000073409	H2-Q6	77.3068	53.8828	100.731	1.86944	0.902608	0.00150036	0.0086331
ENSMUSG00000001467	Cyp51	2496.09	2767.02	2225.15	0.804169	-0.31443	0.00149818	0.00862283
ENSMUSG00000024097	Srsf7	6403.48	6969.22	5837.74	0.837647	-0.255586	0.00149124	0.00858508
ENSMUSG00000038387	Rras	3021.27	2682.43	3360.1	1.25263	0.324963	0.00149031	0.00858197
ENSMUSG00000025151	Maged1	22155	24329.1	19980.8	0.821275	-0.284062	0.00148499	0.00855358
ENSMUSG00000054770	Kctd18	987.829	860.88	1114.78	1.29493	0.372873	0.00148317	0.00854528
ENSMUSG00000021585	Cast	9209.86	8272.75	10147	1.22655	0.29461	0.00148179	0.00853957
ENSMUSG00000028386	Slc46a2	40.7924	24.9395	56.6453	2.27131	1.18352	0.00148041	0.00853385
ENSMUSG00000010841	1700006E09Rik	17.8351	8.78837	26.8818	3.05879	1.61296	0.00147872	0.00852629
ENSMUSG00000054612	Mgmt	306.577	253.826	359.328	1.41565	0.50146	0.00146581	0.00845408
ENSMUSG00000021298	Gpr132	24.0785	13.5518	34.6052	2.55356	1.35251	0.00146318	0.00844113
ENSMUSG00000089810	Gm16536	667.2	743.033	591.368	0.795884	-0.32937	0.00146249	0.00843929
ENSMUSG00000087445	Gm14286	461.974	514.209	409.739	0.796834	-0.327649	0.00145985	0.00842627
ENSMUSG00000026037	Orc2	1622.36	1814.06	1430.67	0.788656	-0.342532	0.00145916	0.00842447
ENSMUSG00000031403	Dkc1	2274.72	2524.65	2024.79	0.802008	-0.318312	0.001444	0.00833911
ENSMUSG00000040599	Mis12	1541.38	1693.73	1389.04	0.820104	-0.286121	0.00144268	0.00833366
ENSMUSG00000028643	Ccdc23	1449.3	1609.42	1289.19	0.80103	-0.320072	0.00144076	0.00832477
ENSMUSG00000022122	Ednrb	3509.58	3921.6	3097.57	0.789876	-0.340302	0.0014405	0.00832477
ENSMUSG00000031204	Asb12	438.731	362.079	515.384	1.4234	0.509342	0.00143186	0.00827764
ENSMUSG00000047250	Ptgs1	1132.32	1264.92	999.726	0.790349	-0.339437	0.00142513	0.00824091
ENSMUSG00000022960	Donson	817.169	923.847	710.49	0.769056	-0.378839	0.00142074	0.00821769
ENSMUSG00000033610	Pank1	3820.68	4250.74	3390.62	0.797654	-0.326166	0.00141922	0.00821101
ENSMUSG00000058492	Scp2-ps2	1204	1069.83	1338.16	1.25081	0.322867	0.00141597	0.00819433
ENSMUSG00000040724	Kcna2	6.81652	1.46543	12.1676	8.30313	3.05365	0.00141387	0.00818435
ENSMUSG00000030590	Fam98c	591.877	503.703	680.052	1.3501	0.433071	0.00141153	0.00817294
ENSMUSG00000038539	Atf5	1894.92	1659.81	2130.03	1.2833	0.359857	0.00141133	0.00817294
ENSMUSG00000022040	Ephx2	14142.2	12789	15495.4	1.21162	0.276939	0.00140784	0.00815581
ENSMUSG00000026770	Il2ra	8.54156	2.11779	14.9653	7.06648	2.82099	0.00139672	0.0080935
ENSMUSG00000039601	Rcan2	19905	17934.5	21875.5	1.21974	0.286579	0.00139661	0.0080935
ENSMUSG00000052539	Magi3	9989.92	8864.34	11115.5	1.25396	0.326488	0.00138713	0.00804217
ENSMUSG00000020326	Ccng1	31000.2	28333.9	33666.4	1.1882	0.248781	0.0013791	0.00799772
ENSMUSG00000072694	1500011B03Rik	178.207	212.085	144.33	0.680531	-0.555268	0.0013734	0.00796673
ENSMUSG00000028469	Npr2	4084.45	3653.02	4515.88	1.23621	0.30592	0.00137094	0.00795456
ENSMUSG00000019850	Tnfaip3	445.648	372.784	518.512	1.39092	0.476038	0.00136829	0.00794124
ENSMUSG00000022994	Adcy6	26850.8	29491.4	24210.1	0.82092	-0.284687	0.00136731	0.00793765
ENSMUSG00000021252	0610007P14Rik	738.925	825.108	652.742	0.791099	-0.338071	0.00136345	0.00791732
ENSMUSG00000028718	Stil	1356.74	1515.68	1197.8	0.790271	-0.33958	0.0013625	0.00791389
ENSMUSG00000000739	Sult5a1	62.1097	48.5831	75.6364	1.55685	0.638627	0.00136067	0.00790528
ENSMUSG00000040021	Lats1	3219.69	2870.96	3568.42	1.24294	0.313753	0.00135845	0.0078945
ENSMUSG00000074580	4931440P22Rik	80.4977	57.9747	103.021	1.777	0.82944	0.00135463	0.00787431
ENSMUSG00000035725	Prkx	3352.82	3003.01	3702.64	1.23297	0.302143	0.00135048	0.00785225
ENSMUSG00000084440		22.9473	11.9904	33.9042	2.82761	1.49958	0.0013495	0.00784863
ENSMUSG00000070720	Tmem200b	340.67	281.332	400.009	1.42184	0.507758	0.00134314	0.00781368
ENSMUSG00000003031	Cdkn1b	4792.66	5284.71	4300.61	0.813784	-0.297282	0.00133774	0.00778435
ENSMUSG00000024742	Fen1	180.768	215.334	146.201	0.678949	-0.558624	0.00133078	0.00774587
ENSMUSG00000024014	Pim1	3558.49	3162.5	3954.48	1.25043	0.322419	0.00132665	0.00772386
ENSMUSG00000052609	Plekhg3	2649.6	2395.45	2903.76	1.21219	0.277621	0.00132495	0.00771602
ENSMUSG00000084433		28.8722	16.4146	41.3297	2.51786	1.3322	0.00132396	0.00771227
ENSMUSG00000057315	Arhgap24	1312.44	1471.43	1153.44	0.783887	-0.351283	0.00132347	0.00771139
ENSMUSG00000087060	2810442I21Rik	196.569	234.434	158.705	0.676973	-0.562829	0.00132332	0.00771139
ENSMUSG00000051331	Cacna1c	21128	23461.6	18794.5	0.801073	-0.319994	0.00131877	0.00768808
ENSMUSG00000026565	Pou2f1	1663.7	1493.16	1834.24	1.22843	0.296819	0.00131701	0.00767983
ENSMUSG00000079084	Ccdc82	800.603	709.216	891.99	1.25771	0.330801	0.00130877	0.00763379
ENSMUSG00000025892	Gria4	35.8384	53.3181	18.3586	0.344322	-1.53817	0.00130722	0.00762678
ENSMUSG00000028603	Scp2	9708.8	8699.66	10717.9	1.23199	0.300996	0.00130633	0.00762359
ENSMUSG00000089026		14.7714	5.12339	24.4195	4.76627	2.25286	0.00130572	0.00762205
ENSMUSG00000041025	Iffo2	1755.53	1540.37	1970.68	1.27936	0.355419	0.00130409	0.00761451
ENSMUSG00000036572	Upf3b	1937.29	2126.38	1748.2	0.82215	-0.282526	0.0013031	0.00761073
ENSMUSG00000021782	Dlg5	2829.65	3163.25	2496.05	0.789078	-0.34176	0.00130167	0.00760441
ENSMUSG00000087623	Gm12404	109.353	79.485	139.221	1.75154	0.808624	0.00130092	0.00760202
ENSMUSG00000071637	Cebpd	261.516	208.449	314.584	1.50916	0.59375	0.00129654	0.00758023
ENSMUSG00000021408	Ripk1	998.763	863.501	1134.03	1.31329	0.393182	0.00129635	0.00758023
ENSMUSG00000002885	Cd97	6816.69	6171.97	7461.4	1.20892	0.273715	0.00129685	0.00758023
ENSMUSG00000029012	Orc5	1028.53	1145.05	912.012	0.796483	-0.328285	0.00129222	0.00755915
ENSMUSG00000021371	Ccdc90a	5256.84	4690.75	5822.93	1.24136	0.311926	0.0012862	0.00752647
ENSMUSG00000021868	Ppif	14310.6	12886.7	15734.5	1.22099	0.288051	0.00128629	0.00752647
ENSMUSG00000055044	Pdlim1	6618.07	5921.23	7314.9	1.23537	0.304941	0.00128479	0.00752164
ENSMUSG00000034235	Usp54	2986.21	3303.41	2669.01	0.807957	-0.30765	0.00128478	0.00752164
ENSMUSG00000040820	Hlcs	849.098	958.168	740.028	0.772337	-0.372698	0.00128198	0.00750916
ENSMUSG00000025855	Prkar1b	199.694	241.124	158.264	0.656359	-0.607443	0.00128128	0.00750726
ENSMUSG00000053070	9230110C19Rik	109.858	136.969	82.7478	0.604135	-0.727056	0.00128131	0.00750726
ENSMUSG00000045284	Dcaf12l1	361.165	423.726	298.605	0.704713	-0.504892	0.00127866	0.00749569
ENSMUSG00000045930	Clec14a	3028.29	2724.38	3332.21	1.22311	0.290549	0.00127231	0.00746044
ENSMUSG00000067833	2900097C17Rik	170.662	135.884	205.44	1.51188	0.596344	0.0012701	0.00744945
ENSMUSG00000015759	Cnih	4212.48	4650.36	3774.6	0.81168	-0.301016	0.00126256	0.00740716
ENSMUSG00000041840	Haus1	1201.04	1344.23	1057.85	0.786957	-0.345642	0.00126235	0.00740716
ENSMUSG00000036197	Gxylt1	2195.58	1919.64	2471.52	1.28749	0.364557	0.00125993	0.00739564
ENSMUSG00000043858	Nup62	4305.45	4822.27	3788.64	0.785655	-0.348033	0.00125947	0.00739559
ENSMUSG00000000983	Expi	8.4561	15.2127	1.69948	0.111715	-3.16211	0.00125958	0.00739559
ENSMUSG00000025858	Get4	4184.61	4607.84	3761.39	0.816303	-0.292824	0.00125717	0.00738531
ENSMUSG00000069171	Nr2f1	341.763	291.012	392.515	1.34879	0.431671	0.00125473	0.00737297
ENSMUSG00000023050	Map3k12	1126.54	1259.8	993.272	0.788437	-0.342933	0.00124629	0.00732529
ENSMUSG00000025357	Dgka	1215.55	1062.96	1368.14	1.28711	0.364134	0.00124529	0.00732134
ENSMUSG00000060862	Zbtb40	1240.04	1384.65	1095.43	0.791123	-0.338027	0.00124337	0.00731201
ENSMUSG00000079662	Ntn3	163.931	204.559	123.303	0.602777	-0.730305	0.0012365	0.00727354
ENSMUSG00000094800		94.4172	65.6301	123.204	1.87726	0.908625	0.00123368	0.00725892
ENSMUSG00000022335	Zfat	486.322	569.054	403.59	0.709229	-0.495676	0.00122989	0.00723854
ENSMUSG00000000804	Usp32	3397.49	3055.82	3739.15	1.22361	0.29115	0.00122856	0.00723316
ENSMUSG00000021713	Ppwd1	780.457	872.908	688.006	0.788177	-0.343408	0.00122866	0.00723316
ENSMUSG00000054855	Rnd1	96.7814	70.1657	123.397	1.75865	0.814472	0.00122594	0.00722102
ENSMUSG00000031298	Gpr64	114.92	87.963	141.877	1.61292	0.689673	0.00122583	0.00722102
ENSMUSG00000040003	Magi2	257.08	210.149	304.011	1.44664	0.532711	0.00122556	0.00722102
ENSMUSG00000009114	2610028H24Rik	9.91216	4.07502	15.7493	3.86484	1.95041	0.00122495	0.00722092
ENSMUSG00000078380	Gm6096	17.3614	7.16643	27.5564	3.84521	1.94306	0.00122431	0.00721908
ENSMUSG00000033361	Prrg3	5546.72	4920.1	6173.34	1.25472	0.327362	0.0012242	0.00721908
ENSMUSG00000026778	Prkcq	204.131	155.185	253.077	1.63081	0.705588	0.00122091	0.00720481
ENSMUSG00000032280	Tle3	1954.03	1736.49	2171.58	1.25056	0.322573	0.00122124	0.00720481
ENSMUSG00000019841	Rev3l	4051.11	3644.79	4457.44	1.22296	0.290379	0.00121953	0.00719858
ENSMUSG00000035606	Ky	3053.65	2718.39	3388.92	1.24666	0.318072	0.00121753	0.00718943
ENSMUSG00000027428	Rbbp9	1268.42	1445.06	1091.78	0.755527	-0.404444	0.00121766	0.00718943
ENSMUSG00000057895	Zfp105	443.51	503.205	383.815	0.762741	-0.390735	0.00121388	0.00717098
ENSMUSG00000020121	Srgap1	2752.11	3046.88	2457.33	0.806508	-0.310239	0.00120849	0.00714103
ENSMUSG00000034898	Filip1	8837.88	7986.24	9689.51	1.21328	0.278907	0.00120793	0.00713959
ENSMUSG00000086095	Gm15328	310.196	355.221	265.17	0.746492	-0.4218	0.00118796	0.00702347
ENSMUSG00000030213	Atf7ip	5064.98	4558.52	5571.44	1.2222	0.289485	0.00118401	0.00700197
ENSMUSG00000031681	Smad1	2314.21	2045.98	2582.44	1.2622	0.335943	0.00118118	0.00698707
ENSMUSG00000028042	Zbtb7b	1290.46	1145.11	1435.81	1.25386	0.326375	0.00118107	0.00698707
ENSMUSG00000009628	Tex15	27.4786	38.0885	16.8686	0.44288	-1.17501	0.00117751	0.00696911
ENSMUSG00000031691	Tnpo2	4358.64	4833.62	3883.65	0.803465	-0.315693	0.00117667	0.00696603
ENSMUSG00000082029	H3f3c	1791.36	1969.53	1613.18	0.819069	-0.287942	0.00117236	0.00694278
ENSMUSG00000043015	Tmem194b	647.039	729.821	564.258	0.773146	-0.371187	0.00117215	0.00694278
ENSMUSG00000049999	Ppp1r3d	2282.81	2581.95	1983.66	0.76828	-0.380296	0.00117243	0.00694278
ENSMUSG00000056476	Med12l	1300.59	1171.69	1429.48	1.22001	0.286895	0.00117008	0.00693442
ENSMUSG00000022462	Slc38a2	48280.6	43268.1	53293.1	1.23169	0.300645	0.00116274	0.00689276
ENSMUSG00000021377	Dek	8225.45	9045.15	7405.75	0.818754	-0.288498	0.00115998	0.00687822
ENSMUSG00000045934	Mtmr11	780.171	670.836	889.506	1.32597	0.407044	0.00115914	0.0068751
ENSMUSG00000027332	Ivd	9365.12	10403.5	8326.69	0.800371	-0.321259	0.00115693	0.00686384
ENSMUSG00000042608	Stk40	3417.03	3038.79	3795.28	1.24895	0.32071	0.00115356	0.00684564
ENSMUSG00000056427	Slit3	940.907	1066.38	815.432	0.764671	-0.387089	0.00115159	0.00683582
ENSMUSG00000021190	Lgmn	5448.83	4861.2	6036.47	1.24177	0.312392	0.00114961	0.00682586
ENSMUSG00000026098	Pms1	363.805	430.8	296.811	0.688977	-0.537473	0.00114775	0.00681665
ENSMUSG00000074219	Gm10644	102.113	128.657	75.5689	0.587365	-0.767671	0.0011473	0.00681578
ENSMUSG00000031519	Asb5	453.408	381.492	525.323	1.37702	0.461551	0.00114606	0.00681032
ENSMUSG00000024883	Rin1	285.945	241.787	330.103	1.36526	0.449179	0.00114607	0.00681032
ENSMUSG00000066607	6030419C18Rik	701.037	605.956	796.119	1.31382	0.393772	0.00114266	0.00679371
ENSMUSG00000070424	Art5	124.741	99.4174	150.066	1.50945	0.594022	0.00114118	0.00678671
ENSMUSG00000090247	Bloc1s1	1744.48	1563.85	1925.12	1.23101	0.299846	0.00114012	0.00678223
ENSMUSG00000048215	A630023P12Rik	9.23513	2.26054	16.2097	7.17071	2.84212	0.00113664	0.00676373
ENSMUSG00000029782	Tmem209	1699.47	1895.92	1503.01	0.79276	-0.335043	0.0011367	0.00676373
ENSMUSG00000058013	2011-09-01	9006.66	9894.04	8119.27	0.820623	-0.285209	0.00113575	0.00676172
ENSMUSG00000040896	Kcnd3	151.672	123.547	179.797	1.45529	0.541307	0.00113326	0.00674906
ENSMUSG00000058486	Wdr91	1347.41	1508.88	1185.94	0.785971	-0.347451	0.00113332	0.00674906
ENSMUSG00000029249	Rest	2529.42	2809.17	2249.67	0.800831	-0.32043	0.0011299	0.00673231
ENSMUSG00000078550	Dear1	12.6029	5.8327	19.3731	3.32147	1.73182	0.00112725	0.00671833
ENSMUSG00000060260	Pwwp2b	651.563	556.718	746.408	1.34073	0.423018	0.00112611	0.00671412
ENSMUSG00000029014	Dnajc2	2306.75	2560.58	2052.92	0.801739	-0.318796	0.00112624	0.00671412
ENSMUSG00000005980	Dnase1	323.442	372.343	274.542	0.737336	-0.439606	0.0011225	0.0066954
ENSMUSG00000028238	Atp6v0d2	10.3712	4.0251	16.7173	4.15326	2.05424	0.0011185	0.00667334
ENSMUSG00000035540	Gc	7.56663	12.7645	2.36878	0.185576	-2.42992	0.00111507	0.00665465
ENSMUSG00000041852	Tcf20	3277.2	3634.69	2919.7	0.803287	-0.316013	0.00111226	0.00663968
ENSMUSG00000047502	Heatr8	86.6253	113.311	59.9397	0.528984	-0.918705	0.00111078	0.00663262
ENSMUSG00000022843	Clcn2	715.334	812.487	618.181	0.760851	-0.394314	0.00110828	0.00661951
ENSMUSG00000063146	Clip2	1972.4	1744.78	2200.02	1.26091	0.334468	0.00110714	0.00661449
ENSMUSG00000020868	Xylt2	2025.95	1812.94	2238.96	1.23499	0.304495	0.0011023	0.00658731
ENSMUSG00000056708	Ier5	2382.15	2115.36	2648.94	1.25224	0.324514	0.0011	0.00657536
ENSMUSG00000036983	Tfb1m	491.985	566.077	417.892	0.738224	-0.43787	0.00109103	0.00652353
ENSMUSG00000056366	Fabp3-ps1	36402.6	32978	39827.2	1.20769	0.27225	0.00108985	0.0065182
ENSMUSG00000037570	Mcrs1	4616.54	5131.19	4101.89	0.799403	-0.323005	0.00108878	0.00651358
ENSMUSG00000038412	Higd1a	5810.52	5172.3	6448.73	1.24678	0.318208	0.00108377	0.00648533
ENSMUSG00000072437	Nanos1	118.795	148.9	88.6889	0.595625	-0.747523	0.00108292	0.00648199
ENSMUSG00000045999	AY036118	2093.13	2352.86	1833.39	0.779217	-0.359903	0.00107987	0.0064655
ENSMUSG00000062397	Zfp706	12507.2	13814.8	11199.6	0.810697	-0.302765	0.00107242	0.00642265
ENSMUSG00000002104	Rapsn	1388.36	1559.9	1216.82	0.780063	-0.358337	0.00107157	0.00641927
ENSMUSG00000031299	Pdha1	62971.8	56712.8	69230.8	1.22073	0.287739	0.00107105	0.00641792
ENSMUSG00000087406	E130215H24Rik	19.0177	8.47116	29.5643	3.49	1.80323	0.00106997	0.00641319
ENSMUSG00000019558	Slc6a8	12428.3	11100	13756.7	1.23935	0.309579	0.00106995	0.00641319
ENSMUSG00000037606	Osbpl5	2689.32	3032.51	2346.13	0.773658	-0.370232	0.00106816	0.00640575
ENSMUSG00000051486	Pcdhb11	56.5127	41.9274	71.098	1.69574	0.761914	0.00106225	0.00637205
ENSMUSG00000022026	Olfm4	15.227	23.3636	7.09054	0.303487	-1.72029	0.00106167	0.00637028
ENSMUSG00000034308	Sdr42e1	150.823	116.636	185.01	1.58622	0.665589	0.00105557	0.00633541
ENSMUSG00000024142	Mlst8	1560.22	1726.41	1394.03	0.807473	-0.308515	0.0010542	0.00632893
ENSMUSG00000043496	Tril	1202.92	1079.65	1326.18	1.22834	0.296711	0.00105122	0.00631275
ENSMUSG00000042570	Mier2	796.604	910.831	682.377	0.749181	-0.416614	0.00104129	0.00625482
ENSMUSG00000031697	Orc6	1379.07	1535.28	1222.85	0.796498	-0.328257	0.00103387	0.00621191
ENSMUSG00000032402	Smad3	3275.91	3651.75	2900.07	0.794158	-0.332502	0.00103255	0.00620675
ENSMUSG00000029165	Agbl5	1184.17	1333.39	1034.95	0.776177	-0.365542	0.00103273	0.00620675
ENSMUSG00000065952	C330021F23Rik	67.1238	86.3816	47.8659	0.554121	-0.851727	0.00103231	0.00620675
ENSMUSG00000045215	Asxl3	337.906	290.633	385.179	1.32531	0.406333	0.00102827	0.00618497
ENSMUSG00000026755	Arpc5l	3301.91	2910.28	3693.54	1.26913	0.343845	0.00102488	0.00616624
ENSMUSG00000032381	Fam96a	3964.25	4391.62	3536.89	0.805372	-0.312272	0.00102351	0.00615972
ENSMUSG00000045613	Chrm2	4378.44	3954.11	4802.76	1.21462	0.28051	0.00102113	0.00614706
ENSMUSG00000073888	Ccl27a	582.368	654.299	510.436	0.780127	-0.358218	0.00101562	0.00611553
ENSMUSG00000094840		31.4957	17.8551	45.1362	2.52792	1.33795	0.00101264	0.00609924
ENSMUSG00000034520	Gjc1	5001.73	5458.6	4544.86	0.832605	-0.264295	0.00101179	0.00609576
ENSMUSG00000025900	Rp1	9.01601	2.62754	15.4045	5.8627	2.55157	0.00101033	0.00608866
ENSMUSG00000027536	Chmp4c	497.916	425.595	570.238	1.33986	0.422082	0.00100633	0.00606709
ENSMUSG00000047787	Flrt1	185.032	225.394	144.67	0.641852	-0.639687	0.00100648	0.00606709
ENSMUSG00000079139	Gm4204	4730.23	5197.56	4262.9	0.820173	-0.286	0.00100389	0.00605476
ENSMUSG00000020612	Prkar1a	56603.9	50787.6	62420.1	1.22904	0.297534	0.00100154	0.00604223
ENSMUSG00000023064	Sncg	36.9213	22.3013	51.5413	2.31113	1.2086	0.00100024	0.00603605
ENSMUSG00000036202	Rif1	3715.57	3396.95	4034.2	1.18759	0.248042	0.0010001	0.00603605
ENSMUSG00000020102	Slc16a7	634.033	538.272	729.794	1.35581	0.439154	0.000994073	0.0060021
ENSMUSG00000042333	Tnfrsf14	115.299	88.8364	141.762	1.59577	0.674248	0.000993167	0.00599826
ENSMUSG00000027597	Ahcy	629.268	713.334	545.202	0.764302	-0.387786	0.000992563	0.00599625
ENSMUSG00000023259	Slc26a6	661.831	574.755	748.907	1.303	0.381839	0.000984181	0.00594724
ENSMUSG00000022802	Lmln	566.751	660.115	473.387	0.717129	-0.479696	0.000981674	0.00593371
ENSMUSG00000086907	Gm15298	217.606	175.855	259.356	1.47483	0.560547	0.000978333	0.00591513
ENSMUSG00000031872	Bean1	226.925	183.153	270.696	1.47798	0.563624	0.0009751	0.00589719
ENSMUSG00000070427	Il18bp	231.931	194.665	269.196	1.38286	0.46766	0.000974567	0.00589557
ENSMUSG00000090553	Snrpe	2468.5	2712.54	2224.45	0.82006	-0.286199	0.000972049	0.00588194
ENSMUSG00000035275	Raver2	467.209	549.86	384.558	0.699374	-0.515864	0.000966638	0.0058508
ENSMUSG00000037583	Nr0b2	405.148	471.407	338.889	0.718888	-0.476162	0.000963158	0.00583133
ENSMUSG00000004939	Nmrk2	3203.07	2891.98	3514.17	1.21514	0.281125	0.000959555	0.00581111
ENSMUSG00000043091	Tuba1c	3300.9	3701.83	2899.98	0.78339	-0.352197	0.000957444	0.00579991
ENSMUSG00000029788	Cpa5	4.2426	8.4852	0	0	#NAME?	0.000955956	0.00579247
ENSMUSG00000038437	Mllt6	9424.33	10463.8	8384.91	0.801329	-0.319533	0.000953625	0.00577993
ENSMUSG00000026663	Atf6	7780.74	7002.29	8559.18	1.22234	0.289646	0.000952697	0.00577589
ENSMUSG00000025246	Tbl1x	9793.69	10841.8	8745.62	0.80666	-0.309968	0.000950289	0.00576287
ENSMUSG00000031304	Il2rg	835.859	719.69	952.027	1.32283	0.403628	0.00094461	0.00573
ENSMUSG00000026548	Slamf9	139.688	105.608	173.769	1.64542	0.718457	0.000942117	0.00571644
ENSMUSG00000043019	Edem3	4064.2	3639.6	4488.81	1.23332	0.302553	0.000941526	0.00571442
ENSMUSG00000026687	Aldh9a1	4584.27	5085.46	4083.08	0.802894	-0.316718	0.000940955	0.00571252
ENSMUSG00000031788	Kifc3	4472.36	4093.02	4851.7	1.18536	0.245323	0.00093602	0.00568479
ENSMUSG00000038628	Polr3k	1679.51	1878.35	1480.68	0.788288	-0.343205	0.000936131	0.00568479
ENSMUSG00000092029	Gm9027	170.877	211.553	130.201	0.615453	-0.70028	0.000931413	0.00565924
ENSMUSG00000033044	Dhrs7c	8753.76	7906.92	9600.6	1.2142	0.28001	0.000930875	0.00565752
ENSMUSG00000079499	6530402F18Rik	92.6322	65.1914	120.073	1.84185	0.881157	0.000925893	0.00562879
ENSMUSG00000054474	Thnsl2	332.268	272.872	391.664	1.43534	0.52139	0.000925217	0.00562622
ENSMUSG00000024302	Dtna	2705.63	2436.83	2974.44	1.22062	0.28761	0.000924656	0.00562436
ENSMUSG00000009633	G0s2	1617.64	1476.58	1758.7	1.19106	0.25225	0.000924208	0.00562318
ENSMUSG00000023079	Gtf2ird1	2843.53	3154.13	2532.92	0.803051	-0.316437	0.000921131	0.00560599
ENSMUSG00000027456	Sdcbp2	165.241	132.347	198.135	1.49709	0.582164	0.000920224	0.00560201
ENSMUSG00000059708	Akap17b	537.015	617.918	456.112	0.738142	-0.438029	0.000916332	0.00557985
ENSMUSG00000021922	Itih4	66.8126	45.1158	88.5095	1.96183	0.972198	0.000915972	0.00557919
ENSMUSG00000026816	Gtf3c5	1748.36	1956.09	1540.62	0.787605	-0.344456	0.000914542	0.00557201
ENSMUSG00000093026		108.908	82.3864	135.43	1.64384	0.717067	0.000904993	0.00551535
ENSMUSG00000061518	Cox5b	27688.7	24701	30676.5	1.24191	0.312564	0.000904404	0.00551328
ENSMUSG00000040618	Pck2	1845.37	2063.76	1626.97	0.788352	-0.343087	0.00089879	0.00548056
ENSMUSG00000031672	Got2	50261.9	45643.7	54880.2	1.20236	0.265868	0.000898463	0.00548035
ENSMUSG00000083668	Gm5648	87.3551	109.536	65.1742	0.595002	-0.749033	0.000898507	0.00548035
ENSMUSG00000033439	Ccdc76	551.94	472.863	631.017	1.33446	0.416257	0.00088898	0.00542523
ENSMUSG00000030691	Fchsd2	2396.78	2679.74	2113.83	0.788817	-0.342238	0.000887168	0.00541566
ENSMUSG00000027646	Src	926.423	1045.4	807.448	0.772384	-0.37261	0.00088609	0.00541057
ENSMUSG00000030671	Pde3b	1825.05	2070.11	1580	0.763244	-0.389784	0.000885445	0.00540812
ENSMUSG00000035873	Pawr	220.51	259.56	181.461	0.69911	-0.516408	0.0008852	0.00540812
ENSMUSG00000027406	Idh3b	36954.9	33087.4	40822.5	1.23378	0.303086	0.000882905	0.00539558
ENSMUSG00000026436	Elk4	2787.83	2505.54	3070.12	1.22533	0.293174	0.000882464	0.00539438
ENSMUSG00000002930	Ppp1r17	5.99021	11.3059	0.674482	0.0596574	-4.06715	0.000881793	0.00539176
ENSMUSG00000074578	1500012F01Rik	914.64	1026	803.281	0.782926	-0.353053	0.000880903	0.00538781
ENSMUSG00000074649	BC029722	664.555	582.725	746.384	1.28085	0.357102	0.000880033	0.00538398
ENSMUSG00000070056	Mfhas1	6061.09	6695.63	5426.56	0.810462	-0.303184	0.000878675	0.00537715
ENSMUSG00000041921	Metap1d	4022.73	3605.37	4440.09	1.23152	0.300443	0.000877955	0.00537423
ENSMUSG00000043323	Fbrsl1	3563.08	3208.88	3917.28	1.22076	0.28778	0.000877921	0.00537423
ENSMUSG00000024370	Cdc23	4762.04	5259.25	4264.83	0.810919	-0.302369	0.000874863	0.00535826
ENSMUSG00000079555	Haus3	875.784	984.517	767.051	0.779113	-0.360095	0.000871983	0.0053421
ENSMUSG00000038244	Mical2	24535.4	27106.9	21963.8	0.810268	-0.303529	0.000866949	0.00531273
ENSMUSG00000085277	Gm13943	16.7761	7.99353	25.5588	3.19743	1.67691	0.00086642	0.00531096
ENSMUSG00000022905	Kpna1	9252.66	8295.54	10209.8	1.23076	0.299545	0.000866371	0.00531096
ENSMUSG00000030393	Zik1	437.112	509.405	364.819	0.716167	-0.481632	0.00086476	0.00530372
ENSMUSG00000029516	Cit	1710.21	1922.14	1498.28	0.779485	-0.359408	0.000864391	0.00530292
ENSMUSG00000065541	Mir24-2	65.661	42.5351	88.7869	2.08738	1.06169	0.000857621	0.00526285
ENSMUSG00000021510	A530054K11Rik	537.083	468.437	605.73	1.29309	0.37082	0.000856462	0.00525719
ENSMUSG00000042129	Rassf4	1043.03	913.132	1172.94	1.28452	0.361231	0.000854991	0.00524962
ENSMUSG00000005611	Mrvi1	1138.34	1008.53	1268.16	1.25743	0.330476	0.000853396	0.00524127
ENSMUSG00000030077	Chl1	22.8292	11.8689	33.7895	2.8469	1.50939	0.000845182	0.00519227
ENSMUSG00000012405	Rpl15	2090.18	2300.65	1879.71	0.817035	-0.29153	0.000838833	0.00515469
ENSMUSG00000025815	Dhtkd1	462.52	544.938	380.102	0.697514	-0.519707	0.000831711	0.00511234
ENSMUSG00000033499	Larp4b	7095.68	6386.46	7804.89	1.2221	0.289361	0.000830801	0.00510817
ENSMUSG00000047342	Zfp286	212.428	250.001	174.856	0.699423	-0.515762	0.00083057	0.00510817
ENSMUSG00000032397	Tipin	1590.93	1787.2	1394.66	0.780358	-0.357792	0.000826241	0.00508295
ENSMUSG00000024659	Anxa1	2514.31	2198.96	2829.65	1.28682	0.363805	0.000825395	0.00507916
ENSMUSG00000030786	Itgam	315.38	250.692	380.068	1.51607	0.60034	0.000823244	0.00506733
ENSMUSG00000041126	H2afv	3751.64	4129.22	3374.06	0.817118	-0.291383	0.000820439	0.00505147
ENSMUSG00000087108	Gm16093	9.1842	3.49754	14.8709	4.2518	2.08807	0.000820134	0.00505099
ENSMUSG00000030346	Rad51ap1	1028.77	1164.72	892.813	0.766544	-0.38356	0.000819951	0.00505099
ENSMUSG00000057236	Rbbp4	14993	16432.8	13553.3	0.824769	-0.277938	0.000817047	0.00503575
ENSMUSG00000096687		612.671	684.719	540.623	0.789554	-0.340889	0.000817204	0.00503575
ENSMUSG00000044813	Shb	3357.7	2969.3	3746.09	1.26161	0.335261	0.000816747	0.00503573
ENSMUSG00000038421	Fcrla	23.5936	12.9952	34.192	2.63112	1.39568	0.000816191	0.00503371
ENSMUSG00000085341	Gm15863	17.5445	8.01849	27.0705	3.376	1.75532	0.00081485	0.00502684
ENSMUSG00000032661	Oas3	28.7524	42.6652	14.8396	0.347816	-1.5236	0.000814247	0.00502452
ENSMUSG00000037965	Zc3h7a	5614.51	4988.57	6240.46	1.25095	0.323027	0.000811402	0.00500836
ENSMUSG00000015243	Abca1	2552.65	2275.42	2829.88	1.24368	0.31461	0.000809912	0.00500055
ENSMUSG00000019854	Reps1	3605.09	4014.09	3196.09	0.796219	-0.328763	0.000809246	0.00499783
ENSMUSG00000033233	Trim45	340.776	396.693	284.858	0.718083	-0.477778	0.000808923	0.00499723
ENSMUSG00000019943	Atp2b1	6785.43	6057.06	7513.81	1.2405	0.310927	0.000808369	0.0049952
ENSMUSG00000030536	Iqgap1	10481.7	9394.02	11569.4	1.23157	0.300502	0.000806796	0.00498687
ENSMUSG00000091478	Gm10039	22295.5	20464.3	24126.6	1.17896	0.237515	0.000805171	0.00497822
ENSMUSG00000031803	B3gnt3	888.358	777.502	999.213	1.28516	0.361945	0.000804707	0.00497674
ENSMUSG00000029685	Asb15	1259.92	1088.01	1431.82	1.316	0.39616	0.000804417	0.00497633
ENSMUSG00000034271	Jdp2	568.368	485.136	651.6	1.34313	0.425598	0.000803502	0.00497206
ENSMUSG00000041445	Mmrn2	4628.32	4210.88	5045.77	1.19827	0.260953	0.000803368	0.00497206
ENSMUSG00000048776	Pthlh	58.2044	40.4017	76.0071	1.88129	0.91172	0.000803052	0.00497206
ENSMUSG00000054958	Nt5c1a	579.585	519.289	639.881	1.23222	0.301265	0.000802436	0.00496963
ENSMUSG00000091418	Gm17143	13.0347	4.11807	21.9513	5.33048	2.41427	0.000802037	0.00496855
ENSMUSG00000029190	D5Ertd579e	14223.8	12737.9	15709.8	1.23331	0.30254	0.000802021	0.00496855
ENSMUSG00000074030	Exoc8	1722.44	1495.25	1949.63	1.30388	0.382813	0.000801584	0.00496852
ENSMUSG00000043155	Hpdl	140.657	114.317	166.997	1.46083	0.546785	0.000801213	0.00496808
ENSMUSG00000036986	Pml	2012.95	2265.19	1760.72	0.777294	-0.363468	0.000801288	0.00496808
ENSMUSG00000032555	Topbp1	5455.55	6075.09	4836	0.796037	-0.329092	0.000800118	0.0049636
ENSMUSG00000048200	Efcab4a	1048.93	921.549	1176.31	1.27645	0.352141	0.000799743	0.00496266
ENSMUSG00000068794	Col28a1	130.186	103.546	156.827	1.51457	0.598905	0.000796943	0.00494668
ENSMUSG00000079641	Rpl39	8764.74	9430	8099.48	0.858905	-0.219429	0.000796853	0.00494668
ENSMUSG00000040136	Abcc8	5928.09	5382.15	6474.03	1.20287	0.26648	0.000791698	0.00491788
ENSMUSG00000078762	Haus5	290.19	342.844	237.536	0.692841	-0.529403	0.00079186	0.00491788
ENSMUSG00000032285	Dnaja4	3089.15	2671.96	3506.34	1.31227	0.392066	0.000790536	0.00491241
ENSMUSG00000052407	4930473A06Rik	187.812	151.445	224.179	1.48027	0.565857	0.000789632	0.00490817
ENSMUSG00000033938	Ndufb7	13198.2	12006	14390.4	1.1986	0.261353	0.000789165	0.00490664
ENSMUSG00000059890	Ube4a	3852.48	3404.95	4300.01	1.26287	0.336706	0.000781731	0.00486179
ENSMUSG00000001366	Fbxo9	5169.81	4573.83	5765.8	1.2606	0.334116	0.000781433	0.0048613
ENSMUSG00000026749	Nek6	1313.63	1478.46	1148.8	0.777029	-0.363959	0.00078009	0.00485431
ENSMUSG00000040264	Gbp5	211.973	177.203	246.743	1.39243	0.477603	0.000778291	0.00484448
ENSMUSG00000044098	Rsbn1	925.06	805.953	1044.17	1.29557	0.373586	0.000776775	0.0048364
ENSMUSG00000037710	Cisd1	7028.93	6282.33	7775.54	1.23768	0.307643	0.000775214	0.00482803
ENSMUSG00000021754	Map3k1	2814.79	2503.48	3126.1	1.2487	0.320427	0.000773809	0.00482064
ENSMUSG00000038685	Rtel1	2635.89	2932.99	2338.8	0.797413	-0.326601	0.000770662	0.00480239
ENSMUSG00000028382	Rod1	6209.04	5535.55	6882.53	1.24333	0.314213	0.000770162	0.00480062
ENSMUSG00000028914	Casp9	1819.89	2040.96	1598.81	0.783359	-0.352254	0.000769609	0.00479852
ENSMUSG00000031448	Adprhl1	17265.6	15287.4	19243.9	1.2588	0.332054	0.000765513	0.00477433
ENSMUSG00000019878	Hsf2	2161.87	2426.32	1897.41	0.782014	-0.354734	0.000759621	0.00473892
ENSMUSG00000058248	Kcnh1	31.1126	44.1384	18.0867	0.409773	-1.2871	0.000758414	0.00473272
ENSMUSG00000030674	Qprt	30.8395	45.9243	15.7546	0.343056	-1.54348	0.000750783	0.00468642
ENSMUSG00000017418	Arl5b	3830.43	3405.85	4255.01	1.24933	0.321149	0.00075055	0.00468628
ENSMUSG00000062127	Cttnbp2nl	4332.83	3872.77	4792.89	1.23759	0.307531	0.000750015	0.00468426
ENSMUSG00000038528	BC021785	36.2901	24.0192	48.5611	2.02176	1.01561	0.000746942	0.00466639
ENSMUSG00000022657	Cd96	6.65258	1.93227	11.3729	5.88576	2.55723	0.000746305	0.00466372
ENSMUSG00000001518	Itfg2	1627.73	1811.27	1444.19	0.797337	-0.326739	0.000744496	0.00465373
ENSMUSG00000071177	Serpina1d	3.63144	7.26289	0	0	#NAME?	0.000743291	0.00464751
ENSMUSG00000020107	Anapc16	2332.32	2573.56	2091.08	0.812524	-0.299519	0.000742636	0.00464472
ENSMUSG00000052760	A630001G21Rik	226.016	188.515	263.517	1.39786	0.483216	0.000734923	0.00459778
ENSMUSG00000071562	Stfa1	69.1079	86.6739	51.5418	0.594663	-0.749856	0.000734375	0.00459565
ENSMUSG00000036565	Ttyh3	8053.38	8990.77	7116	0.791478	-0.337378	0.000732618	0.00458595
ENSMUSG00000095865	Gm13237	300.209	349.637	250.782	0.717265	-0.479422	0.000730566	0.00457498
ENSMUSG00000041939	Mvk	662.457	772.407	552.506	0.715304	-0.483371	0.000730659	0.00457498
ENSMUSG00000039063	Echdc3	953.25	838.603	1067.9	1.27342	0.348712	0.000726497	0.00455149
ENSMUSG00000032547	Ryk	4939.81	5523.05	4356.57	0.788798	-0.342272	0.000719837	0.00451105
ENSMUSG00000022864	D16Ertd472e	260.789	217.28	304.298	1.40049	0.485931	0.000718375	0.00450316
ENSMUSG00000017491	Rarb	1523.64	1697.7	1349.57	0.794938	-0.331085	0.000715981	0.00448942
ENSMUSG00000049676	Catsperg1	65.1927	45.5252	84.8603	1.86403	0.898423	0.000714844	0.00448356
ENSMUSG00000063632	Sox11	155.165	194.457	115.873	0.59588	-0.746907	0.000712605	0.00447078
ENSMUSG00000032028	Fam55b	204.17	162.365	245.975	1.51495	0.599267	0.000710275	0.00445743
ENSMUSG00000030711	Sult1a1	785.271	717.164	853.379	1.18994	0.250884	0.00070813	0.00444523
ENSMUSG00000046410	Kcnk6	805.837	702.103	909.571	1.2955	0.373504	0.000705724	0.00443138
ENSMUSG00000038417	Fig4	5948.61	6604.8	5292.42	0.8013	-0.319586	0.000705486	0.00443114
ENSMUSG00000028345	Tex10	1269.74	1412.21	1127.27	0.798236	-0.325113	0.000705413	0.00443114
ENSMUSG00000039480	Nt5dc1	801.261	697.346	905.177	1.29803	0.376325	0.000704336	0.00442642
ENSMUSG00000021775	Nr1d2	6967.48	6078.91	7856.04	1.29234	0.369989	0.000703018	0.0044194
ENSMUSG00000015697	Setdb1	3617	3995.55	3238.45	0.810513	-0.303092	0.000702261	0.00441589
ENSMUSG00000034602	Mon2	5941.09	5338.72	6543.46	1.22566	0.293559	0.000701585	0.00441289
ENSMUSG00000042323	Pbrm1	9243.14	8335.15	10151.1	1.21787	0.284361	0.000701309	0.00441241
ENSMUSG00000024384	Iws1	4748.56	4215.7	5281.42	1.2528	0.325152	0.000700182	0.00440657
ENSMUSG00000036672	Cenpt	1238.22	1396.51	1079.93	0.773309	-0.370883	0.000698651	0.00439818
ENSMUSG00000092201	A530058N18Rik	987.72	818.759	1156.68	1.41272	0.498481	0.000695763	0.00438134
ENSMUSG00000036103	Colec12	1294.24	1115.61	1472.88	1.32024	0.400802	0.000695777	0.00438134
ENSMUSG00000063415	Cyp26b1	128.978	161.437	96.5202	0.597882	-0.742067	0.000695562	0.00438134
ENSMUSG00000038544	1110054O05Rik	1773.93	1991.47	1556.4	0.781535	-0.355617	0.00069447	0.00437684
ENSMUSG00000036905	C1qb	903.819	778.647	1028.99	1.32151	0.40219	0.000692433	0.00436524
ENSMUSG00000081850	Gm15667	4.99604	1.08737	8.90471	8.18924	3.03373	0.000689784	0.00434978
ENSMUSG00000020590	Snx13	5978.33	5342.77	6613.88	1.23791	0.307908	0.000688392	0.00434224
ENSMUSG00000018846	Pank3	5028.74	4511.43	5546.06	1.22934	0.297878	0.000686657	0.00433253
ENSMUSG00000089901	Gm8113	20501.6	18149.1	22854.2	1.25925	0.332565	0.000686208	0.00433109
ENSMUSG00000031728	Zfp821	1480.88	1673.17	1288.58	0.770144	-0.376801	0.000686233	0.00433109
ENSMUSG00000048865	Arhgap30	291.313	233.112	349.514	1.49934	0.584326	0.000683075	0.00431361
ENSMUSG00000033542	Arhgef5	3142.04	2762.4	3521.67	1.27486	0.350336	0.000681952	0.00430775
ENSMUSG00000014226	Cacybp	4813.94	5298.73	4329.15	0.817016	-0.291564	0.0006819	0.00430775
ENSMUSG00000029287	Tgfbr3	4008.21	4523.71	3492.72	0.772092	-0.373155	0.000680167	0.00429892
ENSMUSG00000022516	Nudt16l1	2259.49	2497.56	2021.41	0.809354	-0.305158	0.000678476	0.00428946
ENSMUSG00000005057	Sh2b2	95.1831	67.4807	122.886	1.82105	0.864769	0.000676794	0.00428038
ENSMUSG00000079164	Tlr5	185.827	220.512	151.142	0.685416	-0.544948	0.000676847	0.00428038
ENSMUSG00000090086	AI480526	3235.75	3595.53	2875.97	0.799873	-0.322157	0.000672515	0.00425542
ENSMUSG00000041560	Gltscr2	5873.48	5240.43	6506.53	1.2416	0.312205	0.000670692	0.0042451
ENSMUSG00000025762	Larp1b	577.173	496.974	657.373	1.32275	0.403541	0.000670259	0.00424357
ENSMUSG00000026879	Gsn	17806	19768.4	15843.7	0.801467	-0.319284	0.000670165	0.00424357
ENSMUSG00000074768	Bhmt	3.70633	7.41266	0	0	#NAME?	0.000670137	0.00424357
ENSMUSG00000018263	Tbx5	1914.24	2160.16	1668.33	0.772318	-0.372732	0.000666726	0.00422482
ENSMUSG00000003123	Lipe	2890.87	2668.43	3113.31	1.16672	0.222458	0.000663303	0.00420434
ENSMUSG00000032482	Cspg5	85.2072	111.181	59.2331	0.532761	-0.908439	0.00066269	0.00420165
ENSMUSG00000039697	Ncoa7	948.354	1077.72	818.984	0.759919	-0.396082	0.000662405	0.00420105
ENSMUSG00000045877	4933415A04Rik	100.981	126.408	75.5533	0.597693	-0.742523	0.000661397	0.00419586
ENSMUSG00000025494	Sigirr	367.882	307.66	428.105	1.39149	0.47663	0.000660988	0.00419446
ENSMUSG00000024907	Gal	53.841	70.9848	36.6971	0.516971	-0.951845	0.000655505	0.00416086
ENSMUSG00000036095	Dgkb	74.1841	50.5244	97.8438	1.93656	0.9535	0.000655278	0.00416061
ENSMUSG00000031111	Igsf1	373.904	305.417	442.392	1.44849	0.534546	0.000653215	0.0041487
ENSMUSG00000029512	Ulk1	7884.18	7066.25	8702.11	1.2315	0.300422	0.000653061	0.0041487
ENSMUSG00000025432	Avil	59.6802	81.5134	37.847	0.464304	-1.10686	0.000649198	0.00412556
ENSMUSG00000022010	Tsc22d1	14332.1	12722.4	15941.9	1.25305	0.325447	0.000643412	0.00408996
ENSMUSG00000037857	Nufip2	3864.93	3431.86	4298	1.25238	0.324677	0.000642318	0.00408417
ENSMUSG00000086682	Gm16023	117.144	86.6845	147.603	1.70276	0.767878	0.000640915	0.00407642
ENSMUSG00000018381	Abi3	428.523	360.736	496.311	1.37583	0.4603	0.000640571	0.00407541
ENSMUSG00000020844	Nxn	1308.52	1455.91	1161.13	0.79753	-0.32639	0.000639912	0.00407284
ENSMUSG00000071072	Ptges3	3649.05	4085.96	3212.14	0.786141	-0.347141	0.000639983	0.00407284
ENSMUSG00000054072	Iigp1	613.54	685.91	541.171	0.788982	-0.341936	0.000639221	0.00407033
ENSMUSG00000028173	Wls	8890.15	9904.84	7875.47	0.795113	-0.330767	0.000638957	0.00406981
ENSMUSG00000063894	Zfp192	2170.39	1934.93	2405.85	1.24338	0.314262	0.000638306	0.00406684
ENSMUSG00000048163	Selplg	131.133	102.997	159.27	1.54636	0.628874	0.000637313	0.00406168
ENSMUSG00000095677	Dynlt1f	591.033	681.384	500.682	0.734802	-0.444574	0.000635253	0.00404972
ENSMUSG00000024601	Isoc1	6963.07	7757.92	6168.22	0.795086	-0.330817	0.00062864	0.00400871
ENSMUSG00000038543	BC028528	770.637	660.998	880.277	1.33174	0.413312	0.000627878	0.004005
ENSMUSG00000003868	Ruvbl2	2173.78	2432.82	1914.75	0.787049	-0.345475	0.000627418	0.00400322
ENSMUSG00000067719	Gm10221	18863.7	16906	20821.4	1.2316	0.300533	0.000627168	0.00400278
ENSMUSG00000002997	Prkar2b	309.886	361.738	258.034	0.713316	-0.487387	0.000626115	0.00399721
ENSMUSG00000046056	Sbsn	282.262	330.749	233.776	0.706808	-0.500609	0.000625866	0.00399677
ENSMUSG00000078942	Naip6	78.851	57.0553	100.647	1.76402	0.818868	0.000624484	0.0039891
ENSMUSG00000055313	Pgbd1	286.042	336.085	235.999	0.7022	-0.510046	0.000622507	0.00397762
ENSMUSG00000020680	Taf15	4302.14	4735.92	3868.36	0.816812	-0.291924	0.000620981	0.00396901
ENSMUSG00000040270	Bach2	1271.67	1108.04	1435.3	1.29535	0.373342	0.000619421	0.00396018
ENSMUSG00000040669	Phc1	2186.84	2482.64	1891.04	0.761706	-0.392693	0.00061811	0.00395294
ENSMUSG00000015337	Endog	856.303	752.552	960.055	1.27573	0.351326	0.000617907	0.00395278
ENSMUSG00000039518	Cdsn	30.0049	44.7048	15.3051	0.342359	-1.54642	0.000617644	0.00395225
ENSMUSG00000040675	Mthfd1l	521.649	607.988	435.311	0.715985	-0.481998	0.000616443	0.0039457
ENSMUSG00000040562	Gstm2	1457.37	1629.24	1285.5	0.789014	-0.341877	0.000614587	0.00393496
ENSMUSG00000007038	Neu1	1589.85	1408.05	1771.65	1.25823	0.331395	0.000613145	0.00392686
ENSMUSG00000019790	Stxbp5	2062.8	1819.35	2306.25	1.26762	0.34212	0.000612266	0.00392236
ENSMUSG00000087204	1700073E17Rik	27.0061	40.2812	13.731	0.34088	-1.55267	0.000611471	0.0039184
ENSMUSG00000024677	Ms4a6b	206.826	161.737	251.915	1.55756	0.639287	0.000610424	0.00391282
ENSMUSG00000047996	Prrg1	919.458	797.063	1041.85	1.30712	0.386387	0.000605961	0.00388534
ENSMUSG00000049295	Zfp219	2943.57	3307.71	2579.43	0.779824	-0.35878	0.00060543	0.00388306
ENSMUSG00000026679	Enkur	125.218	96.8413	153.594	1.58604	0.665431	0.000604444	0.00387786
ENSMUSG00000033355	Rtp4	329.324	384.668	273.981	0.712253	-0.489539	0.000603288	0.00387156
ENSMUSG00000046229	Scand1	788.274	674.34	902.208	1.33791	0.419983	0.000602886	0.0038701
ENSMUSG00000091160	Gm17133	15.561	7.3301	23.7919	3.24578	1.69856	0.00060214	0.00386644
ENSMUSG00000027067	Ssrp1	8407	9288.17	7525.83	0.81026	-0.303544	0.000599488	0.00385052
ENSMUSG00000004207	Psap	51138.9	45916.6	56361.2	1.22747	0.295688	0.000597939	0.00384169
ENSMUSG00000052911	Lamb2	23214.3	20944.4	25484.3	1.21676	0.283047	0.0005972	0.00383806
ENSMUSG00000061759	1700052N19Rik	993.01	1137.56	848.459	0.745857	-0.423029	0.000596608	0.00383536
ENSMUSG00000057335	Cep170	3366.98	2985.37	3748.59	1.25565	0.328434	0.000592895	0.0038126
ENSMUSG00000078429	Ctdsp2	14932.3	16461.7	13402.9	0.814188	-0.296567	0.000591268	0.00380324
ENSMUSG00000059208	Hnrnpm	13962.6	15365.2	12559.9	0.817423	-0.290845	0.000590737	0.00380093
ENSMUSG00000039318	Rab3gap2	3419.49	3036.12	3802.86	1.25254	0.324859	0.000590347	0.00379952
ENSMUSG00000057894	Zfp329	1898.51	1665.76	2131.27	1.27946	0.355535	0.000590056	0.00379875
ENSMUSG00000090522	Gm5919	14.5144	23.6167	5.41205	0.229162	-2.12556	0.000582826	0.0037533
ENSMUSG00000027080	Med19	1424	1595.5	1252.5	0.78502	-0.349198	0.00057969	0.00373419
ENSMUSG00000020380	Rad50	2026.06	2264.4	1787.72	0.78949	-0.341007	0.000578543	0.00372788
ENSMUSG00000027603	Ggt7	129.918	96.9375	162.898	1.68044	0.748838	0.000576944	0.00371866
ENSMUSG00000025764	Phf17	4219.58	3770.75	4668.41	1.23806	0.30808	0.000576942	0.00371866
ENSMUSG00000020937	Plcd3	2906.13	3268.2	2544.06	0.778429	-0.361363	0.000576152	0.00371572
ENSMUSG00000059939	9430015G10Rik	981.395	1109.97	852.818	0.768325	-0.380211	0.000575005	0.0037094
ENSMUSG00000029673	Auts2	3715.49	3335.92	4095.05	1.22756	0.295798	0.000574163	0.00370505
ENSMUSG00000017765	Slc12a4	6513.7	5819	7208.4	1.23877	0.308907	0.000572015	0.00369309
ENSMUSG00000025330	Padi4	134.62	168.431	100.808	0.598514	-0.740544	0.000572143	0.00369309
ENSMUSG00000073755	5730409E04Rik	762.1	650.71	873.49	1.34236	0.424776	0.000571282	0.00369104
ENSMUSG00000034714	Ttyh2	1740.1	1553.82	1926.39	1.23978	0.310081	0.000571492	0.00369104
ENSMUSG00000026077	Npas2	1334.74	1524.05	1145.44	0.751575	-0.412011	0.000571342	0.00369104
ENSMUSG00000036893	Ehmt1	4832.23	5384.81	4279.66	0.794765	-0.3314	0.000569826	0.0036835
ENSMUSG00000038718	Pbx3	1909.32	2152.61	1666.03	0.773956	-0.369676	0.000569036	0.00367947
ENSMUSG00000029231	Pdgfra	4009.4	3514.04	4504.75	1.28193	0.358313	0.000567416	0.00367007
ENSMUSG00000032393	Dpp8	9006.23	8056.22	9956.23	1.23584	0.305495	0.0005665	0.00366521
ENSMUSG00000021987	Mtmr6	4144.3	3679.42	4609.17	1.25269	0.325026	0.000565928	0.00366258
ENSMUSG00000020653	Klf11	4457.22	4990.63	3923.8	0.786232	-0.346973	0.000565485	0.00366078
ENSMUSG00000036155	Mgat5	899.265	781.679	1016.85	1.30085	0.379459	0.000564869	0.00365786
ENSMUSG00000034118	Tpst1	1892.11	1673.47	2110.75	1.26131	0.334918	0.000564364	0.00365566
ENSMUSG00000074899	Spnb5	198.975	169.866	228.085	1.34274	0.425178	0.000564099	0.00365501
ENSMUSG00000038388	Mpp6	3282.16	3666.75	2897.57	0.790228	-0.339659	0.000563524	0.00365236
ENSMUSG00000050503	Fbxl22	9205.09	8124.41	10285.8	1.26603	0.340315	0.000563319	0.0036521
ENSMUSG00000001089	Luzp1	8132.06	7246.73	9017.38	1.24434	0.315377	0.000562198	0.00364589
ENSMUSG00000030249	Abcc9	36610.4	32768.9	40451.8	1.23446	0.303875	0.000561105	0.00363987
ENSMUSG00000001630	Stk38l	2584.58	2862.21	2306.95	0.806002	-0.311145	0.000561018	0.00363987
ENSMUSG00000059647	Gm10068	275.218	328.326	222.11	0.676492	-0.563855	0.00056049	0.00363801
ENSMUSG00000062373	Tmem65	12158.3	10831.4	13485.3	1.24502	0.316173	0.0005594	0.003632
ENSMUSG00000032271	Nnmt	363.396	300.727	426.065	1.41678	0.502618	0.000558425	0.00362673
ENSMUSG00000022283	Pabpc1	22560.9	24984.7	20137.1	0.805977	-0.31119	0.000557564	0.0036222
ENSMUSG00000070644	Etnk2	71.7776	49.8207	93.7345	1.88144	0.911835	0.000556943	0.00361923
ENSMUSG00000073164	2410018L13Rik	373.24	443.342	303.138	0.683756	-0.548447	0.000556514	0.0036175
ENSMUSG00000032040	Dcps	1357.45	1511.29	1203.61	0.796414	-0.328409	0.00055311	0.00359643
ENSMUSG00000071553	Cpa2	30.7955	43.0334	18.5576	0.431238	-1.21344	0.000551896	0.00358959
ENSMUSG00000093930	Hmgcs1	9114.66	10138.7	8090.6	0.797989	-0.325558	0.000549089	0.00357238
ENSMUSG00000051456	Hspb3	869.366	996.796	741.935	0.74432	-0.426005	0.000548585	0.00357015
ENSMUSG00000020734	Grin2c	64.3056	41.843	86.7683	2.07366	1.05218	0.000546461	0.00355737
ENSMUSG00000018932	Map2k3	3077.85	2732.4	3423.31	1.25286	0.325224	0.000545077	0.00354941
ENSMUSG00000031698	Mylk3	34974	31057.8	38890.2	1.25219	0.32445	0.000544819	0.00354877
ENSMUSG00000027669	Gnb4	3354.79	2987.34	3722.24	1.246	0.317307	0.00054341	0.00354064
ENSMUSG00000030223	Ptpro	184.432	144.998	223.866	1.54392	0.626602	0.000542303	0.00353446
ENSMUSG00000034297	Med13	6193.86	5531.14	6856.59	1.23963	0.309915	0.000542128	0.00353436
ENSMUSG00000062609	Kcnj15	244.817	272.35	217.283	0.797808	-0.325887	0.000541826	0.00353344
ENSMUSG00000031016	Wee1	2143.23	2387.07	1899.39	0.795699	-0.329706	0.000541569	0.00353279
ENSMUSG00000037798	Mat1a	9.79718	16.1013	3.49305	0.216942	-2.20462	0.00054102	0.00353026
ENSMUSG00000025860	Xiap	7859.08	7013.11	8705.04	1.24125	0.311796	0.00054043	0.00352745
ENSMUSG00000074064	Mlycd	6687.63	6057.35	7317.92	1.20811	0.272747	0.000539976	0.00352552
ENSMUSG00000080768	Gm12219	6.93443	0.937733	12.9311	13.7898	3.78553	0.000539602	0.00352412
ENSMUSG00000031749	St3gal2	3475.92	3086.73	3865.1	1.25217	0.324429	0.000539523	0.00352412
ENSMUSG00000078789	Dph1	928.32	1054.64	802	0.760449	-0.395077	0.000538752	0.00352064
ENSMUSG00000029070	Mxra8	3425.3	3010.18	3840.42	1.27581	0.351416	0.000535079	0.00349797
ENSMUSG00000057719	Sh3rf2	390.618	461.014	320.222	0.694604	-0.525737	0.000535125	0.00349797
ENSMUSG00000084781	D930015M05Rik	78.5716	57.7362	99.407	1.72174	0.783871	0.000534485	0.00349585
ENSMUSG00000073002	Vamp5	945.211	799.569	1090.85	1.3643	0.448164	0.00053384	0.00349266
ENSMUSG00000032584	Mst1r	299.99	246.33	353.65	1.43567	0.521728	0.000533285	0.00349006
ENSMUSG00000024427	Spry4	2084.12	1837.29	2330.96	1.2687	0.343351	0.000532471	0.00348576
ENSMUSG00000028356	Ambp	4.72664	9.11339	0.339897	0.0372964	-4.74482	0.000532298	0.00348566
ENSMUSG00000020297	Nsg2	82.7315	104.174	61.2885	0.588326	-0.765313	0.000531045	0.00347849
ENSMUSG00000038084	Opa1	15518	13989.1	17046.9	1.21858	0.285204	0.000528865	0.00346523
ENSMUSG00000018736	Ndel1	4810.85	4269.03	5352.67	1.25384	0.326351	0.000528222	0.00346204
ENSMUSG00000006517	Mvd	504.107	590.201	418.013	0.708256	-0.497657	0.000524583	0.00343921
ENSMUSG00000059883	Irak4	466.92	389.334	544.506	1.39856	0.483941	0.000523185	0.00343106
ENSMUSG00000038400	Pmepa1	4509.29	4000.21	5018.36	1.25453	0.327142	0.000522174	0.00342544
ENSMUSG00000027322	Siglec1	138.861	174.101	103.622	0.595183	-0.748595	0.00052114	0.00341968
ENSMUSG00000035493	Tgfbi	1411.82	1580.35	1243.28	0.786709	-0.346098	0.000519934	0.00341277
ENSMUSG00000061887	Ssbp3	3405.78	3803.21	3008.36	0.791005	-0.338242	0.00051737	0.00339695
ENSMUSG00000031628	Casp3	1688.7	1892	1485.4	0.785092	-0.349066	0.000515285	0.00338426
ENSMUSG00000024151	Msh2	2042.11	2287.67	1796.56	0.785322	-0.348644	0.000515065	0.00338382
ENSMUSG00000054793	Cadm4	1537.83	1349.75	1725.9	1.27868	0.354654	0.000514641	0.00338203
ENSMUSG00000041220	Elovl6	440.96	517.3	364.62	0.704853	-0.504606	0.000512212	0.00336707
ENSMUSG00000026527	Rgs7	32.0472	17.5413	46.5532	2.65392	1.40813	0.000510363	0.00335591
ENSMUSG00000033276	Stk36	154.514	191.895	117.134	0.610404	-0.712165	0.000510031	0.00335472
ENSMUSG00000046618	Olfml2a	1835.2	1583.17	2087.23	1.31839	0.398776	0.000508463	0.00334541
ENSMUSG00000023008	Fmnl3	6784.65	6059.69	7509.62	1.23928	0.309496	0.000507458	0.00333978
ENSMUSG00000022003	Slc25a30	643.424	734.375	552.472	0.752301	-0.410617	0.000505817	0.00332998
ENSMUSG00000033460	Armcx1	1862.71	2073.02	1652.4	0.797099	-0.32717	0.000505349	0.00332788
ENSMUSG00000019732	Calr3	184.424	142.377	226.472	1.59065	0.669617	0.000504948	0.00332623
ENSMUSG00000022139	Mbnl2	16437.1	14771.5	18102.8	1.22552	0.293398	0.000501661	0.0033062
ENSMUSG00000041920	Slc16a6	929.784	838.596	1020.97	1.21748	0.283893	0.000501758	0.0033062
ENSMUSG00000024053	Emilin2	19149.1	17299.7	20998.5	1.2138	0.279537	0.000501644	0.0033062
ENSMUSG00000023919	Cenpq	881.956	1018.96	744.953	0.731093	-0.451874	0.00050145	0.0033062
ENSMUSG00000052414	Atf7	1230.41	1077.45	1383.38	1.28393	0.360571	0.000500021	0.00329868
ENSMUSG00000037608	Bclaf1	10669.1	9526.04	11812.2	1.23999	0.310324	0.000499168	0.00329403
ENSMUSG00000021070	Bdkrb2	91.07	63.7089	118.431	1.85894	0.894479	0.000498914	0.00329334
ENSMUSG00000038332	Sesn1	4094.47	4538.87	3650.07	0.80418	-0.31441	0.000498324	0.00329042
ENSMUSG00000062949	Atp11c	1704.87	1523.2	1886.54	1.23854	0.308636	0.000496755	0.00328104
ENSMUSG00000059022	Kcp	1668.39	1507.31	1829.47	1.21374	0.279454	0.000496146	0.00327799
ENSMUSG00000052143	Gm9869	59.2689	36.2811	82.2567	2.26721	1.18092	0.000495495	0.00327467
ENSMUSG00000087024	B230119M05Rik	48.1865	65.6162	30.7569	0.468739	-1.09314	0.000494991	0.00327232
ENSMUSG00000042042	Csgalnact2	1995.8	1759.58	2232.02	1.2685	0.343121	0.000494645	0.00327101
ENSMUSG00000034801	Sos2	3746.32	3313.41	4179.24	1.26131	0.334925	0.000494284	0.0032696
ENSMUSG00000048721	C030019I05Rik	49.4604	31.7025	67.2184	2.12029	1.08426	0.000491631	0.00325302
ENSMUSG00000092867	Mir3058	15.5755	4.94865	26.2024	5.29485	2.40459	0.000491268	0.00325159
ENSMUSG00000046223	Plaur	476.211	408.233	544.19	1.33304	0.414718	0.000490947	0.00325043
ENSMUSG00000042496	Prdm10	512.684	437.367	588.002	1.34441	0.426976	0.000490778	0.00325028
ENSMUSG00000038702	Dsel	1250.55	1100.97	1400.13	1.27173	0.34679	0.000489812	0.00324486
ENSMUSG00000019777	Hdac2	8425.7	9329.54	7521.86	0.806241	-0.310717	0.000489781	0.00324486
ENSMUSG00000019907	Ppp1r12a	6721.72	5958.91	7484.54	1.25603	0.328866	0.000488505	0.00323814
ENSMUSG00000035105	Egln3	3659.28	3227.68	4090.88	1.26744	0.341913	0.000483359	0.00320498
ENSMUSG00000039842	Mcph1	774.496	905.91	643.082	0.709873	-0.494366	0.000482985	0.00320346
ENSMUSG00000022772	Senp5	1704.97	1486.01	1923.93	1.29469	0.372611	0.0004817	0.0031959
ENSMUSG00000025758	Plk4	1823.16	2036.28	1610.03	0.790673	-0.338846	0.000481184	0.00319343
ENSMUSG00000088268		23.5707	10.7318	36.4095	3.39266	1.76242	0.000480952	0.00319285
ENSMUSG00000052373	Mpp3	640.926	570.079	711.774	1.24855	0.320258	0.00048094	0.00319285
ENSMUSG00000025105	Bnc1	92.7694	118.169	67.3702	0.57012	-0.810663	0.000478727	0.00317998
ENSMUSG00000046186	Cd109	2504.82	2202.27	2807.38	1.27477	0.350233	0.000478406	0.00317881
ENSMUSG00000038954	Supt3h	981.462	1124.06	838.869	0.746287	-0.422197	0.000478092	0.00317767
ENSMUSG00000027011	Ube2e3	6010.66	6650.44	5370.88	0.807597	-0.308292	0.000477799	0.00317667
ENSMUSG00000026972	Arrdc1	575.552	492.455	658.649	1.33748	0.419518	0.000473061	0.00314612
ENSMUSG00000034210	4732418C07Rik	3588.01	3149.94	4026.08	1.27814	0.354051	0.000472926	0.00314612
ENSMUSG00000073000	Gm10451	86.3926	112.569	60.2158	0.534922	-0.902599	0.000471279	0.00313615
ENSMUSG00000001441	Npepps	9983.18	11080.7	8885.72	0.801912	-0.318483	0.000470521	0.00313204
ENSMUSG00000079669	Gm17396	188.149	221.887	154.411	0.695901	-0.523046	0.000469448	0.00312584
ENSMUSG00000035629	1700021K19Rik	4697.19	5234.3	4160.07	0.79477	-0.331391	0.000465652	0.0031015
ENSMUSG00000034333	Zbed4	1177.56	1337.58	1017.55	0.760738	-0.394528	0.000465504	0.00310144
ENSMUSG00000020513	Tubd1	749.342	862.906	635.778	0.736787	-0.44068	0.000462826	0.00308453
ENSMUSG00000044646	Zbtb7c	258.753	216.722	300.783	1.38788	0.472881	0.000461432	0.00307617
ENSMUSG00000036225	Kctd1	581.135	679.001	483.27	0.711736	-0.490585	0.000461043	0.0030745
ENSMUSG00000050840	Cdh20	528.685	624.109	433.26	0.694206	-0.526565	0.000459403	0.00306448
ENSMUSG00000038569	Rad9b	184.943	219.709	150.176	0.683519	-0.548947	0.000458226	0.00305755
ENSMUSG00000062382	Gm10116	3500.29	3834.32	3166.27	0.825771	-0.276186	0.000452728	0.00302178
ENSMUSG00000037434	Slc30a1	2201.08	1946.39	2455.76	1.2617	0.335373	0.000449347	0.00300011
ENSMUSG00000035764	Fbxo45	2262.3	2479.9	2044.69	0.824505	-0.2784	0.00044841	0.00299476
ENSMUSG00000078249	Hmga1-rs1	841.34	983.944	698.736	0.710138	-0.49383	0.0004472	0.00298758
ENSMUSG00000030849	Fgfr2	433.814	494.585	373.044	0.754256	-0.406874	0.000446581	0.00298435
ENSMUSG00000079038	D130040H23Rik	56.3429	36.7198	75.966	2.0688	1.0488	0.000443483	0.00296454
ENSMUSG00000071203	Naip5	112.083	83.7635	140.402	1.67617	0.745171	0.000443209	0.0029636
ENSMUSG00000046280	She	3252.84	2887.72	3617.95	1.25288	0.325244	0.000443128	0.0029636
ENSMUSG00000034401	Spata6	1426.64	1249.44	1603.84	1.28365	0.360256	0.000439526	0.00294075
ENSMUSG00000017412	Cacnb4	206.951	163.855	250.048	1.52604	0.609789	0.000439281	0.00294
ENSMUSG00000074797	Itpa	1587.65	1792.86	1382.44	0.771078	-0.375051	0.000437384	0.00292818
ENSMUSG00000008193	Spib	55.7233	32.8085	78.6382	2.39689	1.26116	0.000437027	0.00292668
ENSMUSG00000060890	Arr3	26.4492	40.9396	11.9587	0.292106	-1.77544	0.000433742	0.00290556
ENSMUSG00000037513	Samd4b	4719.08	5326.32	4111.85	0.771987	-0.373351	0.000432291	0.00289672
ENSMUSG00000070084	Mir486	64.4039	42.352	86.4558	2.04136	1.02953	0.000429833	0.00288112
ENSMUSG00000032120	C2cd2l	1572.15	1400.78	1743.53	1.24469	0.315782	0.000429365	0.00287885
ENSMUSG00000048578	Mlec	14488.6	16009.9	12967.3	0.809952	-0.304091	0.000426945	0.00286349
ENSMUSG00000041697	Cox6a1	11580.3	12918.4	10242.2	0.792843	-0.334892	0.000426127	0.00285887
ENSMUSG00000044060	A830010M20Rik	955.76	816.98	1094.54	1.33974	0.42195	0.000424787	0.00285074
ENSMUSG00000007812	Zfp655	2482.63	2168.54	2796.72	1.28968	0.367008	0.00042435	0.00284867
ENSMUSG00000020491	2810021J22Rik	314.328	370.717	257.939	0.695784	-0.523288	0.000424213	0.00284862
ENSMUSG00000026779	Mastl	1056.8	1203.53	910.081	0.756179	-0.403201	0.000422915	0.00284076
ENSMUSG00000036622	Atp13a2	2772.59	3128.42	2416.76	0.772518	-0.37236	0.000421556	0.00283249
ENSMUSG00000074345	Tnfaip8l3	19.1564	30.0981	8.21468	0.27293	-1.8734	0.000418376	0.00281198
ENSMUSG00000053007	Creb5	1278.92	1100.16	1457.69	1.32498	0.405966	0.000417514	0.00280704
ENSMUSG00000074748	Atxn7l3b	6874.16	7585.72	6162.6	0.812394	-0.299749	0.000415787	0.00279627
ENSMUSG00000024737	Slc15a3	298.896	247.292	350.501	1.41735	0.5032	0.000415002	0.00279184
ENSMUSG00000047412	Zbtb44	2656.06	2944.25	2367.88	0.804239	-0.314304	0.000414806	0.00279137
ENSMUSG00000028484	Psip1	5550.38	6185.65	4915.1	0.794597	-0.331704	0.000412914	0.00277948
ENSMUSG00000058656	Samd12	11.1434	3.73987	18.547	4.95927	2.31013	0.000411969	0.00277412
ENSMUSG00000027848	Olfml3	1477.54	1646.57	1308.51	0.79469	-0.331535	0.000411992	0.00277412
ENSMUSG00000028878	Fam76a	3690.69	3251.59	4129.8	1.27009	0.344925	0.000408054	0.00274927
ENSMUSG00000026765	Lypd6b	13.1774	22.1978	4.15691	0.187266	-2.41684	0.000407602	0.00274706
ENSMUSG00000040351	Ankib1	2554.16	2250.9	2857.42	1.26945	0.344208	0.000407314	0.00274596
ENSMUSG00000029414	Kntc1	1961.48	2219.38	1703.58	0.767592	-0.381588	0.000406114	0.0027387
ENSMUSG00000019997	Ctgf	5646.98	6148.24	5145.71	0.836939	-0.256805	0.000402844	0.00271748
ENSMUSG00000073821	8030451A03Rik	33.5871	18.5396	48.6346	2.62328	1.39137	0.000401777	0.00271111
ENSMUSG00000044162	Tnip3	54.463	73.6776	35.2484	0.478414	-1.06367	0.000401426	0.00270956
ENSMUSG00000004018	Fancl	850.418	970.34	730.495	0.752824	-0.409616	0.000399325	0.0026962
ENSMUSG00000031488	Rab11fip1	118.675	151.071	86.278	0.571108	-0.808166	0.000399306	0.0026962
ENSMUSG00000036928	Stag3	207.474	159.904	255.044	1.59499	0.673543	0.000398682	0.0026935
ENSMUSG00000022136	Dnajc3	4527.8	3986.39	5069.21	1.27163	0.34668	0.000398106	0.00269044
ENSMUSG00000056043	Rgs9bp	59.5348	86.7129	32.3567	0.373147	-1.42218	0.000396868	0.00268289
ENSMUSG00000041696	Rasl12	921.526	787.103	1055.95	1.34157	0.423917	0.000396673	0.00268238
ENSMUSG00000030609	Aen	3011.99	2640.24	3383.75	1.28161	0.357956	0.000394309	0.00266722
ENSMUSG00000070574	2310016G11Rik	10.8974	4.09998	17.6947	4.31581	2.10963	0.000393933	0.00266556
ENSMUSG00000039474	Wfs1	3025.14	2700	3350.27	1.24084	0.311316	0.000393944	0.00266556
ENSMUSG00000082292	Gm12250	56.9271	78.9771	34.8771	0.44161	-1.17915	0.000391086	0.00264784
ENSMUSG00000029683	Lmod2	13383.5	11664.6	15102.5	1.29472	0.37264	0.000390944	0.00264768
ENSMUSG00000059439	Bcas3	1679.02	1471.09	1886.95	1.28269	0.359168	0.00039062	0.0026463
ENSMUSG00000059173	Pde1a	756.431	639.598	873.265	1.36533	0.449255	0.000389579	0.00264005
ENSMUSG00000038533	Cbfa2t2	3038.44	3432.42	2644.45	0.770434	-0.376257	0.000388937	0.00263651
ENSMUSG00000034009	Rxfp1	597.435	687.808	507.062	0.737214	-0.439844	0.000388925	0.00263651
ENSMUSG00000037475	Thoc2	5282.51	4712.52	5852.5	1.2419	0.312554	0.00038706	0.0026254
ENSMUSG00000000290	Itgb2	240.056	196.64	283.472	1.44158	0.527649	0.000385639	0.00261656
ENSMUSG00000064043	Trerf1	885.301	1020.64	749.962	0.734796	-0.444584	0.0003846	0.00261031
ENSMUSG00000020857	Nme2	5616.7	5154.09	6079.3	1.17951	0.238189	0.000383737	0.00260563
ENSMUSG00000040331	Nsmce4a	4154.55	4651.1	3658.01	0.786483	-0.346513	0.000383793	0.00260563
ENSMUSG00000020290	Xpo1	9418.75	10579	8258.49	0.780648	-0.357256	0.000382988	0.00260176
ENSMUSG00000014498	Ankrd52	8515.1	7667.91	9362.3	1.22097	0.28803	0.000382424	0.00259873
ENSMUSG00000028066	Pmf1	1877.47	2142.66	1612.28	0.752467	-0.410299	0.00038218	0.00259786
ENSMUSG00000033420	Antxr1	3825.28	3349.7	4300.86	1.28395	0.360591	0.000381137	0.00259157
ENSMUSG00000001436	Slc19a1	443.214	516.768	369.661	0.715333	-0.483313	0.000379555	0.0025816
ENSMUSG00000091625	Lsm5	497.715	566.399	429.031	0.757471	-0.400737	0.000377174	0.00256619
ENSMUSG00000052914	Cyp2j6	710.822	613.198	808.446	1.31841	0.398798	0.000376408	0.00256177
ENSMUSG00000036391	Sec24a	2215.69	1967.67	2463.71	1.25209	0.324342	0.000376158	0.00256085
ENSMUSG00000031584	Gsr	2223.71	2488.69	1958.74	0.787058	-0.345459	0.000376138	0.00256085
ENSMUSG00000032053	Pou2af1	31.1656	15.7623	46.569	2.95446	1.5629	0.000373991	0.00254767
ENSMUSG00000025907	Rb1cc1	5426.88	4799.54	6054.21	1.26141	0.335042	0.000373018	0.00254182
ENSMUSG00000033826	Dnahc8	131.732	96.9593	166.506	1.71727	0.780121	0.000372667	0.00254022
ENSMUSG00000040195	Tmem194	1327.37	1487.35	1167.4	0.784885	-0.349446	0.000370285	0.00252475
ENSMUSG00000024290	Rock1	7499.67	6649.24	8350.1	1.2558	0.328606	0.000369343	0.00251911
ENSMUSG00000028334	Nans	2102.28	2373.6	1830.96	0.771383	-0.374481	0.000366568	0.00250095
ENSMUSG00000016206	H2-M3	171.013	132.732	209.294	1.57682	0.657017	0.000365138	0.00249196
ENSMUSG00000031393	Mecp2	5859.26	5198.91	6519.61	1.25403	0.326577	0.000363396	0.00248119
ENSMUSG00000016757	Ttll12	1162.09	1328.37	995.812	0.749651	-0.41571	0.000363448	0.00248119
ENSMUSG00000025223	Ldb1	7602.9	8439.89	6765.91	0.801659	-0.318939	0.000361933	0.00247237
ENSMUSG00000040860	Crocc	1454.26	1671.75	1236.77	0.739806	-0.434781	0.000358815	0.00245183
ENSMUSG00000026941	Mamdc4	494.427	575.844	413.009	0.717223	-0.479505	0.000358451	0.0024501
ENSMUSG00000020634	Ubxn2a	3868	3455.15	4280.84	1.23897	0.309147	0.000358237	0.00244939
ENSMUSG00000006740	Kif5b	16912.8	15017.5	18808.2	1.25242	0.324719	0.000355584	0.002432
ENSMUSG00000039672	Kcne2	27.2275	40.3839	14.0712	0.348436	-1.52103	0.000354871	0.00242787
ENSMUSG00000037363	Letm2	338.506	387.971	289.041	0.745006	-0.424675	0.000354196	0.002424
ENSMUSG00000022718	Dgcr8	3055.6	3380.65	2730.55	0.807699	-0.308111	0.000353382	0.00241918
ENSMUSG00000028701	1520402A15Rik	300.55	353.714	247.387	0.699397	-0.515816	0.000351976	0.0024103
ENSMUSG00000036916	Zfp280c	1921.01	1711.58	2130.44	1.24472	0.315823	0.000351668	0.00240894
ENSMUSG00000039701	Usp53	588.381	492.732	684.03	1.38824	0.473257	0.000350971	0.00240491
ENSMUSG00000067879	3110035E14Rik	27.5361	12.8854	42.1869	3.27401	1.71106	0.000350755	0.00240417
ENSMUSG00000040964	Arhgef10l	4371.79	3907.47	4836.1	1.23766	0.30761	0.000350522	0.00240332
ENSMUSG00000031371	Haus7	1219.82	1373.63	1066.01	0.776057	-0.365765	0.000347884	0.00238597
ENSMUSG00000054843	Atrnl1	2698.53	2389.57	3007.5	1.2586	0.331817	0.000347713	0.00238554
ENSMUSG00000029475	Kdm2b	2280.1	2591.53	1968.68	0.759659	-0.396576	0.000346889	0.00238062
ENSMUSG00000051652	Lrrc3	124.95	160.135	89.7652	0.56056	-0.835059	0.000346816	0.00238062
ENSMUSG00000025409	Mbd6	4995.3	5643.08	4347.53	0.770418	-0.376286	0.000345557	0.00237295
ENSMUSG00000037742	Eef1a1	256098	283155	229041	0.80889	-0.305985	0.000345319	0.00237205
ENSMUSG00000021974	Fgf9	776.128	887.11	665.147	0.74979	-0.415441	0.00034461	0.00236791
ENSMUSG00000092526	Gm17907	41.1175	25.0465	57.1885	2.28329	1.19112	0.000343638	0.00236197
ENSMUSG00000038618	Rassf7	194.992	230.103	159.881	0.694825	-0.525279	0.000342566	0.00235533
ENSMUSG00000027347	Rasgrp1	36.0727	18.9359	53.2095	2.80999	1.49056	0.000340899	0.00234459
ENSMUSG00000092495	Gm20405	11.8238	3.95035	19.6973	4.98622	2.31795	0.000339739	0.00233734
ENSMUSG00000031161	Hdac6	3685.78	4159.67	3211.89	0.77215	-0.373046	0.000339683	0.00233734
ENSMUSG00000026032	Ndufb3	5138.16	4453.07	5823.25	1.30769	0.387023	0.000338656	0.00233134
ENSMUSG00000031736	4933436C20Rik	732.409	828.601	636.217	0.767821	-0.381158	0.000337756	0.00232587
ENSMUSG00000028221	Tmem55a	3413.11	3822.18	3004.04	0.785949	-0.347493	0.000337444	0.00232444
ENSMUSG00000039155	Cdh26	54.1652	33.018	75.3124	2.28095	1.18963	0.000335439	0.00231135
ENSMUSG00000021703	Serinc5	4807.93	4247.63	5368.23	1.26382	0.337789	0.000334946	0.00230867
ENSMUSG00000020074	Ccar1	7152.88	7912.71	6393.04	0.807946	-0.307669	0.000334525	0.00230649
ENSMUSG00000024530	Slmo1	32.1977	49.1897	15.2057	0.309124	-1.69374	0.000333241	0.00229835
ENSMUSG00000020282	Rhbdf1	3575.37	3146.38	4004.36	1.27269	0.347879	0.000331562	0.00228748
ENSMUSG00000028587	Orc1	246.476	291.518	201.434	0.690985	-0.533274	0.000329819	0.00227616
ENSMUSG00000006456	Rbm14	1869.37	2114.33	1624.42	0.768288	-0.380281	0.000328696	0.00226912
ENSMUSG00000059741	Myl3	302505	271496	333514	1.22843	0.296816	0.000325055	0.00224468
ENSMUSG00000000532	Acvr1b	3493.57	3953.47	3033.67	0.767344	-0.382054	0.000323272	0.00223306
ENSMUSG00000039568	Fam100a	1873.39	1660.28	2086.5	1.25672	0.329658	0.000321304	0.00222017
ENSMUSG00000039770	Ypel5	2631.67	2910.11	2353.23	0.808638	-0.306435	0.000321185	0.00222003
ENSMUSG00000044674	Fzd1	2257.73	2537.25	1978.2	0.779663	-0.359077	0.000320396	0.00221571
ENSMUSG00000071035	Gm5499	567.742	668.71	466.773	0.69802	-0.51866	0.00032046	0.00221571
ENSMUSG00000019194	Scn1b	372.972	306.832	439.112	1.43112	0.51714	0.000319597	0.00221113
ENSMUSG00000026960	Arl6ip6	1658.71	1877.24	1440.18	0.767179	-0.382364	0.000318281	0.00220271
ENSMUSG00000016028	Celsr1	3040.31	3487.28	2593.35	0.743662	-0.427282	0.000316208	0.00218905
ENSMUSG00000028165	Cisd2	5215.8	4634.89	5796.7	1.25067	0.322698	0.000315555	0.00218521
ENSMUSG00000032478	Nme6	932.657	1070.6	794.717	0.742312	-0.429902	0.000315499	0.00218521
ENSMUSG00000053310	Nrgn	445.114	368.744	521.485	1.41422	0.500004	0.000315196	0.00218409
ENSMUSG00000019763	Rmnd1	5432.43	6062.32	4802.53	0.792193	-0.336077	0.000315019	0.00218409
ENSMUSG00000019992	Fam54a	382.202	449.877	314.528	0.699142	-0.516344	0.0003151	0.00218409
[truncated: 3,199 more rows]
