# Supplementary material for: Complete cardiac regeneration in a mouse model of myocardial infarction
Source: Aging (Albany NY). 2012 Dec 31;4(12):966–77. doi: 10.18632/aging.100526 (PMC3615162; doi:10.18632/aging.100526)
Supplement: Supplementary file 4 [file aging-04-966-s004.xlsx]

## Sheet: Supp Table 1C Gene expression d
Transcript ID	MGI gene symbol	Mean expression	Mean expression P1	Mean expression P10	Fold change P10/P1	log2 fold change P10/P1	p value	p value adjusted *
ENSMUSG00000076937	Iglc2	11.5437	0	23.0874	Inf	Inf	9.93863e-12	1.73839e-10
ENSMUSG00000045967	Gpr158	3.7574	0	7.5148	Inf	Inf	0.000406916	0.0022755
ENSMUSG00000076940	Iglv2	2.95034	0	5.90067	Inf	Inf	0.00333084	0.0145447
ENSMUSG00000051906	Cd209f	2.74921	0	5.49842	Inf	Inf	0.00721274	0.02834
ENSMUSG00000016150	Odz1	2.28405	0	4.56809	Inf	Inf	0.00737072	0.0288478
ENSMUSG00000030230	Plcz1	1.81333	0	3.62666	Inf	Inf	0.0255231	0.0825854
ENSMUSG00000078117	Gm16485	1.67811	0	3.35622	Inf	Inf	0.0283658	0.0898991
ENSMUSG00000090012	Gm16555	1.94492	0	3.88985	Inf	Inf	0.0318649	0.0988458
ENSMUSG00000082141	Gm11212	1.87731	0	3.75462	Inf	Inf	0.0332586	0.102136
ENSMUSG00000095488		1.61135	0	3.2227	Inf	Inf	0.0399967	0.119052
ENSMUSG00000083442	Gm11187	2.0089	0	4.01781	Inf	Inf	0.0432885	0.126849
ENSMUSG00000076473	Trbv16	1.67533	0	3.35067	Inf	Inf	0.0523135	0.147914
ENSMUSG00000076514	Igkv17-121	1.27778	0	2.55556	Inf	Inf	0.0527182	0.148792
ENSMUSG00000036449	Lcn8	1.14256	0	2.28511	Inf	Inf	0.0600433	0.165035
ENSMUSG00000036586	Grifin	1.14256	0	2.28511	Inf	Inf	0.0600433	0.165035
ENSMUSG00000012042	4930579F01Rik	1.40937	0	2.81874	Inf	Inf	0.0626546	0.170667
ENSMUSG00000036800	Fam135b	1.07495	0	2.14989	Inf	Inf	0.0643856	0.174322
ENSMUSG00000094797		1.07495	0	2.14989	Inf	Inf	0.0643856	0.174322
ENSMUSG00000074637	Sox2	1.34176	0	2.68352	Inf	Inf	0.0659341	0.177612
ENSMUSG00000088423		1.34176	0	2.68352	Inf	Inf	0.0659341	0.177612
ENSMUSG00000082932	Cyp2j8	1.21102	0	2.42204	Inf	Inf	0.0732824	0.19311
ENSMUSG00000079639	Rhox4a	1.60858	0	3.21715	Inf	Inf	0.0762368	0.199083
ENSMUSG00000076615	Ighg3	1.14341	0	2.28682	Inf	Inf	0.0777096	0.201783
ENSMUSG00000047528	Als2cr12	1.41023	0	2.82045	Inf	Inf	0.0855848	0.216825
ENSMUSG00000077827		1.41023	0	2.82045	Inf	Inf	0.0855848	0.216825
ENSMUSG00000085161	Gm7580	1.07665	0	2.15331	Inf	Inf	0.108371	0.259119
ENSMUSG00000096890		1.00904	0	2.01808	Inf	Inf	0.114604	0.270217
ENSMUSG00000068289	Cma2	0.80621	0	1.61242	Inf	Inf	0.138469	0.310627
ENSMUSG00000092905		0.80621	0	1.61242	Inf	Inf	0.138469	0.310627
ENSMUSG00000090223	Pcp4	40.0975	0.635112	79.5599	125.269	6.96889	3.88899e-31	2.30149e-29
ENSMUSG00000090061	3110047P20Rik	4.73704	0.20652	9.26756	44.8748	5.48783	0.000446627	0.00247834
ENSMUSG00000026650	Meig1	9.54136	0.428592	18.6541	43.5242	5.44375	3.38924e-07	3.37914e-06
ENSMUSG00000008874	Clec3a	5.36597	0.288791	10.4431	36.1616	5.17639	0.000596667	0.00320536
ENSMUSG00000095982	Vmn1r3	3.79027	0.20652	7.37403	35.7061	5.1581	0.00334461	0.0145907
ENSMUSG00000091089	A930018M24Rik	125.784	7.98604	243.583	30.5011	4.93079	8.1151e-70	2.00977e-67
ENSMUSG00000090041	Gm16027	3.24917	0.20652	6.29182	30.4659	4.92912	0.0205054	0.0689784
ENSMUSG00000028341	Nr4a3	1928.59	128.357	3728.82	29.0503	4.86048	0	0
ENSMUSG00000052099	Prss51	3.33651	0.222071	6.45095	29.049	4.86042	0.00250418	0.0113389
ENSMUSG00000085772	D630024D03Rik	2.98876	0.20652	5.771	27.944	4.80447	0.00704669	0.0278014
ENSMUSG00000030137	Tuba8	3485.61	246.882	6724.34	27.2371	4.7675	0	0
ENSMUSG00000084929	4732418A04Rik	192.37	13.843	370.897	26.7931	4.74379	5.61215e-91	2.29412e-88
ENSMUSG00000076618	Ighj4	2.85247	0.20652	5.49842	26.6241	4.73466	0.0241897	0.0789188
ENSMUSG00000081979	Gm8078	2.85247	0.20652	5.49842	26.6241	4.73466	0.0241897	0.0789188
ENSMUSG00000074354	9230115E21Rik	2.93255	0.222071	5.64304	25.4109	4.66738	0.00558359	0.0227258
ENSMUSG00000083645	Gm14086	9.29845	0.717382	17.8795	24.9233	4.63942	1.0151e-07	1.1049e-06
ENSMUSG00000076619	Ighj3	2.85662	0.222071	5.49116	24.727	4.62802	0.0330964	0.101765
ENSMUSG00000085635	Gm14565	2.45214	0.20652	4.69776	22.7472	4.50762	0.039241	0.117229
ENSMUSG00000018411	Mapt	2745.81	239.016	5252.61	21.976	4.45785	5.6903e-299	3.14019e-295
ENSMUSG00000031250	Tnmd	13.2698	1.21269	25.3269	20.8848	4.38438	3.09398e-08	3.60594e-07
ENSMUSG00000027224	Duoxa1	19.6272	1.81219	37.4422	20.6613	4.36886	6.82264e-12	1.21063e-10
ENSMUSG00000088464	Mir1970	2.1222	0.20652	4.03788	19.552	4.28924	0.0350042	0.106592
ENSMUSG00000095609		2.11579	0.20652	4.02507	19.4899	4.28466	0.0829829	0.212157
ENSMUSG00000039321	Uts2r	10.0994	0.990622	19.2082	19.3901	4.27725	3.42996e-07	3.41819e-06
ENSMUSG00000034623	Prss55	2.25623	0.222071	4.29039	19.3199	4.27201	0.0324609	0.1003
ENSMUSG00000090217	Gm16116	2.89638	0.288791	5.50397	19.0587	4.25238	0.0130388	0.0469064
ENSMUSG00000043931	Gimap7	4.24129	0.428592	8.05398	18.7917	4.23203	0.0031364	0.0137914
ENSMUSG00000077964		3.90302	0.428592	7.37744	17.2132	4.10544	0.015278	0.0536675
ENSMUSG00000090799	Klhl33	67.9643	7.47534	128.453	17.1836	4.10296	6.04435e-34	4.10532e-32
ENSMUSG00000055632	Hmcn2	2713.33	302.976	5123.69	16.9112	4.07991	2.64788e-261	1.16899e-257
ENSMUSG00000096003	Gm3500	7.03974	0.799653	13.2798	16.607	4.05372	0.000317142	0.00182117
ENSMUSG00000028584	Lrrc38	1.92159	0.222071	3.62111	16.3061	4.02734	0.12153	0.282117
ENSMUSG00000054672	5830411N06Rik	3.70851	0.428592	6.98843	16.3056	4.02729	0.00319024	0.0140059
ENSMUSG00000070574	2310016G11Rik	11.193	1.29496	21.0911	16.287	4.02565	1.1479e-07	1.23785e-06
ENSMUSG00000091418	Gm17143	13.9051	1.64129	26.1689	15.9442	3.99496	7.72104e-08	8.55593e-07
ENSMUSG00000026255	Efhd1	267.53	31.8215	503.238	15.8144	3.98317	1.21617e-96	5.96573e-94
ENSMUSG00000015843	Rxrg	1400.19	166.709	2633.67	15.7979	3.98167	2.23582e-209	5.48372e-206
ENSMUSG00000032532	Cck	9.63697	1.15516	18.1188	15.685	3.97132	2.18894e-06	1.92735e-05
ENSMUSG00000090291	Lrrc10b	84.71	10.545	158.875	15.0663	3.91326	6.96195e-41	6.83014e-39
ENSMUSG00000005640	Insrr	7.00803	0.872734	13.1433	15.0599	3.91264	0.000147623	0.000917925
ENSMUSG00000073052	D130052B06Rik	1.64978	0.20652	3.09303	14.9769	3.90467	0.0602563	0.165476
ENSMUSG00000032094	Cd3d	9.15441	1.14597	17.1628	14.9766	3.90464	2.74701e-05	0.000198746
ENSMUSG00000033268	Duox1	52.7216	6.67851	98.7648	14.7884	3.8864	6.04989e-25	2.66027e-23
ENSMUSG00000058925	1700011I03Rik	1.71961	0.222071	3.21715	14.487	3.85669	0.17781	0.371002
ENSMUSG00000024979	Tectb	9.8983	1.27941	18.5172	14.4732	3.85531	6.76864e-06	5.46092e-05
ENSMUSG00000085678	Gm16349	2.22732	0.288791	4.16584	14.4251	3.85051	0.0436435	0.127736
ENSMUSG00000085002	Gm12984	1.58302	0.20652	2.95952	14.3304	3.84101	0.0806596	0.207709
ENSMUSG00000093861		3.15963	0.41304	5.90622	14.2994	3.83788	0.0155595	0.0544482
ENSMUSG00000022347	A1bg	3.87569	0.510862	7.24051	14.1731	3.82509	0.0114753	0.0421128
ENSMUSG00000026114	Cnga3	16.3183	2.15215	30.4845	14.1647	3.82423	7.03419e-09	8.86766e-08
ENSMUSG00000063727	Tnfrsf11b	231.838	30.72	432.955	14.0936	3.81697	1.78363e-82	5.96543e-80
ENSMUSG00000025013	Tll2	200.715	26.6437	374.785	14.0666	3.8142	1.96909e-74	5.57252e-72
ENSMUSG00000087172	Gm12153	15.051	2.04981	28.0522	13.6853	3.77455	1.55993e-08	1.89718e-07
ENSMUSG00000042115	Klhdc8a	1427.1	194.829	2659.38	13.6498	3.77081	7.47602e-194	1.65026e-190
ENSMUSG00000042474	Faim3	16.5425	2.32757	30.7575	13.2145	3.72405	1.5278e-09	2.08435e-08
ENSMUSG00000053044	Cd8b1	6.78576	0.955005	12.6165	13.2109	3.72366	0.000361886	0.00205037
ENSMUSG00000015354	Pcolce2	933.435	132.009	1734.86	13.142	3.71611	1.38185e-165	2.03354e-162
ENSMUSG00000040950	Mgl2	23.6836	3.36484	44.0023	13.0771	3.70897	5.35972e-11	8.71211e-10
ENSMUSG00000055170	Ifng	1.4495	0.20652	2.69249	13.0374	3.70458	0.146448	0.32314
ENSMUSG00000095571		1.44225	0.20652	2.67797	12.9671	3.69679	0.264177	0.488936
ENSMUSG00000042425	Frmpd3	27.071	3.91132	50.2306	12.8424	3.68284	2.36947e-14	5.18371e-13
ENSMUSG00000086527	Gm15856	33.3747	4.84626	61.9032	12.7734	3.67507	8.4603e-16	2.09129e-14
ENSMUSG00000045776	Lrtm1	7427.56	1091.64	13763.5	12.6081	3.65628	1.46855e-247	5.40279e-244
ENSMUSG00000004296	Il12b	1.95495	0.288791	3.62111	12.5389	3.64833	0.120137	0.279765
ENSMUSG00000032093	Cd3e	8.4034	1.25467	15.5521	12.3954	3.63173	0.000513298	0.00280598
ENSMUSG00000021214	Akr1c18	1.38019	0.20652	2.55385	12.3661	3.62832	0.0912399	0.227728
ENSMUSG00000089595		1.37826	0.20652	2.55001	12.3475	3.62615	0.199558	0.403123
ENSMUSG00000038591	Colec10	32.8226	4.93473	60.7105	12.3027	3.6209	2.75409e-16	7.07728e-15
ENSMUSG00000022996	Wnt10b	28.7643	4.35079	53.1778	12.2226	3.61147	9.52791e-15	2.18059e-13
ENSMUSG00000079295	Klrb1-ps1	1.89374	0.288791	3.4987	12.115	3.59872	0.0520682	0.14737
ENSMUSG00000053168	9030619P08Rik	2.90645	0.444143	5.36875	12.0879	3.59549	0.0297042	0.0932304
ENSMUSG00000093120	Mir3474	1.45002	0.222071	2.67797	12.0591	3.59204	0.263633	0.488618
ENSMUSG00000076498	Trbc2	21.5063	3.29812	39.7145	12.0415	3.58995	1.95098e-10	2.99485e-09
ENSMUSG00000079071	Gm14085	29.8747	4.60396	55.1455	11.9778	3.58229	8.64529e-13	1.65656e-11
ENSMUSG00000020676	Ccl11	9.09323	1.40366	16.7828	11.9564	3.57971	1.33455e-05	0.000102572
ENSMUSG00000026971	Itgb6	573.175	89.1956	1057.15	11.8521	3.56707	4.44324e-129	4.08667e-126
ENSMUSG00000030110	Ret	774.331	120.822	1427.84	11.8177	3.56287	2.6007e-152	3.18932e-149
ENSMUSG00000089399		2.62493	0.41304	4.83683	11.7103	3.54971	0.0335226	0.10276
ENSMUSG00000084115	Gm13566	2.62216	0.41304	4.83128	11.6969	3.54805	0.0571304	0.158708
ENSMUSG00000076633	Ighv5-2	1.31065	0.20652	2.41479	11.6927	3.54754	0.204783	0.410422
ENSMUSG00000025481	1190003J15Rik	4.22765	0.666214	7.78909	11.6916	3.5474	0.00417054	0.0176903
ENSMUSG00000041653	Pnpla3	99.2832	15.753	182.813	11.605	3.53667	6.45032e-37	5.17761e-35
ENSMUSG00000086943	4732414G09Rik	1.38967	0.222071	2.55726	11.5155	3.52551	0.1505	0.329709
ENSMUSG00000085412	Gm15055	26.1249	4.22202	48.0278	11.3755	3.50786	1.76966e-11	3.02349e-10
ENSMUSG00000028766	Alpl	1456.35	235.445	2677.25	11.371	3.50729	1.11443e-169	1.75713e-166
ENSMUSG00000083677	Gm11699	1.75297	0.288791	3.21715	11.1401	3.47769	0.176023	0.368576
ENSMUSG00000025150	Cbr2	153.633	25.3524	281.913	11.1198	3.47506	1.52169e-53	2.28503e-51
ENSMUSG00000068587	Mgam	83.1113	13.9528	152.27	10.9132	3.448	1.98793e-34	1.38866e-32
ENSMUSG00000089030		1.31928	0.222071	2.41649	10.8816	3.44382	0.273331	0.500582
ENSMUSG00000030739	Myh14	1939.07	330.145	3547.99	10.7467	3.42583	5.85038e-189	1.07618e-185
ENSMUSG00000086762	Gm14546	8.87562	1.51704	16.2342	10.7013	3.41971	6.78167e-05	0.000453494
ENSMUSG00000012819	Cdh23	435.73	75.362	796.098	10.5637	3.40104	4.26331e-105	2.68881e-102
ENSMUSG00000083813	Gm15502	6.69537	1.16153	12.2292	10.5286	3.39624	0.000223073	0.00133553
ENSMUSG00000023176	Cpn2	126.258	21.916	230.6	10.522	3.39534	2.68728e-45	2.99591e-43
ENSMUSG00000080626	Mir1192	2.87027	0.510862	5.22968	10.237	3.35572	0.0702172	0.186497
ENSMUSG00000042184	1700069L16Rik	1.6186	0.288791	2.94841	10.2095	3.35184	0.25273	0.474707
ENSMUSG00000039264	Gimap3	30.3663	5.43472	55.2978	10.1749	3.34694	4.06577e-13	8.03472e-12
ENSMUSG00000025127	Gcgr	53.9317	9.67795	98.1854	10.1453	3.34274	3.91467e-21	1.34809e-19
ENSMUSG00000095654		12.764	2.3075	23.2205	10.0631	3.331	4.51658e-06	3.74949e-05
ENSMUSG00000044499	Hs3st5	49.4843	8.97046	89.9981	10.0327	3.32664	2.32522e-21	8.13421e-20
ENSMUSG00000085639	Gm15410	2.36312	0.428592	4.29765	10.0274	3.32587	0.0486014	0.139564
ENSMUSG00000026697	Myoc	23.661	4.30429	43.0178	9.99415	3.32108	2.65222e-09	3.51411e-08
ENSMUSG00000024798	Htr7	23.8164	4.39575	43.2371	9.8361	3.29809	1.18285e-11	2.05593e-10
ENSMUSG00000033024	Klra9	7.89987	1.46119	14.3385	9.8129	3.29468	0.0018396	0.00871589
ENSMUSG00000076564	Igkv12-46	1.55654	0.288791	2.82429	9.77972	3.28979	0.0819095	0.210144
ENSMUSG00000000248	Clec2g	1.55377	0.288791	2.81874	9.7605	3.28696	0.139951	0.312964
ENSMUSG00000061486	Gm5161	2.22098	0.41304	4.02891	9.75428	3.28604	0.0665321	0.178641
ENSMUSG00000093141		1.55099	0.288791	2.81319	9.74128	3.28411	0.256908	0.48036
ENSMUSG00000092675		1.18684	0.222071	2.1516	9.68877	3.27631	0.166358	0.354308
ENSMUSG00000032259	Drd2	56.8643	10.6738	103.055	9.65493	3.27127	1.8502e-20	6.09572e-19
ENSMUSG00000084153	Gm12186	6.87895	1.29496	12.4629	9.62416	3.26666	0.00283137	0.0126339
ENSMUSG00000079993	Gm11799	6.75261	1.27941	12.2258	9.55579	3.25638	0.000133533	0.000836435
ENSMUSG00000050440	Hamp	3.03437	0.577582	5.49116	9.50716	3.24902	0.0671042	0.179874
ENSMUSG00000094546		1.48701	0.288791	2.68523	9.29818	3.21695	0.191859	0.391631
ENSMUSG00000019828	Grm1	165.824	32.8157	298.832	9.10639	3.18688	1.2992e-51	1.82666e-49
ENSMUSG00000096336		3.12938	0.619561	5.63919	9.10192	3.18617	0.0499805	0.14291
ENSMUSG00000076672	Ighv3-6	2.08298	0.41304	3.75292	9.08608	3.18366	0.117783	0.27581
ENSMUSG00000094335		4.39212	0.872734	7.9115	9.06518	3.18034	0.0159735	0.0557027
ENSMUSG00000081740	Gm14279	1.11645	0.222071	2.01083	9.05486	3.17869	0.291113	0.52287
ENSMUSG00000027863	Cd2	26.6793	5.34326	48.0154	8.98617	3.16771	4.19224e-10	6.1693e-09
ENSMUSG00000020331	Hcn2	1210.54	245.363	2175.71	8.86731	3.1485	3.34408e-140	3.35533e-137
ENSMUSG00000054422	Fabp1	1.42217	0.288791	2.55556	8.84916	3.14554	0.113937	0.269248
ENSMUSG00000065341		1.42217	0.288791	2.55556	8.84916	3.14554	0.113937	0.269248
ENSMUSG00000095354	Gm20504	1.42025	0.288791	2.55171	8.83585	3.14337	0.265737	0.491115
ENSMUSG00000022525	Hrasls	119.39	24.2829	214.498	8.83331	3.14295	4.19832e-36	3.18466e-34
ENSMUSG00000001510	Dlx3	2.09161	0.428592	3.75462	8.76038	3.13099	0.154329	0.335825
ENSMUSG00000076577	Igkv8-30	2.16422	0.444143	3.88429	8.7456	3.12856	0.273625	0.500898
ENSMUSG00000051243	Islr2	109.859	22.8046	196.914	8.63485	3.11017	4.0799e-35	2.95278e-33
ENSMUSG00000024334	H2-Oa	6.51208	1.35249	11.6717	8.62974	3.10932	0.00200969	0.0094067
ENSMUSG00000075010	AW112010	126.683	26.4049	226.96	8.5954	3.10356	1.06949e-38	9.55409e-37
ENSMUSG00000046070	Igfals	174.063	36.4757	311.65	8.54405	3.09492	5.24774e-52	7.52199e-50
ENSMUSG00000032105	Pdzd3	91.2003	19.2257	163.175	8.48732	3.08531	1.22858e-29	6.76301e-28
ENSMUSG00000086220	Gm16599	0.977934	0.20652	1.74935	8.47059	3.08246	0.305702	0.539885
ENSMUSG00000069890	1700024J04Rik	1.94946	0.41304	3.48589	8.43958	3.07717	0.211353	0.420194
ENSMUSG00000072553	Gm525	1.35179	0.288791	2.41479	8.36171	3.0638	0.201561	0.40577
ENSMUSG00000071347	C1qtnf9	1589.42	340.925	2837.92	8.32419	3.05731	3.37782e-144	3.55057e-141
ENSMUSG00000031779	Ccl22	5.19228	1.11487	9.2697	8.31459	3.05564	0.00372485	0.0160059
ENSMUSG00000086245	Gm16170	442.388	95.8147	788.961	8.23423	3.04163	3.7393e-91	1.58733e-88
ENSMUSG00000017344	Vtn	836.686	182.273	1491.1	8.18059	3.03221	1.81929e-116	1.29545e-113
ENSMUSG00000085532	B430319H21Rik	1.96001	0.428592	3.49144	8.14631	3.02615	0.122568	0.283664
ENSMUSG00000086585	Gm16126	3.91725	0.857183	6.97733	8.13983	3.025	0.0306639	0.0957508
ENSMUSG00000064325	Hhip	7.08862	1.55901	12.6182	8.09372	3.0168	0.00292458	0.0129894
ENSMUSG00000087380	2210408F21Rik	98.3267	21.7497	174.904	8.04164	3.00749	9.60635e-31	5.55106e-29
ENSMUSG00000055333	Fat2	45.2548	10.1183	80.3913	7.94515	2.99008	1.39684e-14	3.13034e-13
ENSMUSG00000092953		1.28418	0.288791	2.27956	7.89348	2.98066	0.206931	0.413338
ENSMUSG00000052316	Lrrc15	1049.37	236.165	1862.57	7.88672	2.97942	1.38385e-118	1.01824e-115
ENSMUSG00000040113	Mettl11b	4.76648	1.07289	8.46007	7.88529	2.97916	0.00306943	0.0135531
ENSMUSG00000096715		0.98571	0.222071	1.74935	7.87741	2.97772	0.30482	0.539021
ENSMUSG00000084853	Gm11791	1.89326	0.428592	3.35792	7.83479	2.96989	0.162797	0.348994
ENSMUSG00000028109	Hormad1	1.82235	0.41304	3.23167	7.82409	2.96792	0.16612	0.35402
ENSMUSG00000040350	Trim7	1463.63	332.253	2595	7.8103	2.96538	1.07582e-131	1.03251e-128
ENSMUSG00000006143	2310043J07Rik	0.90947	0.20652	1.61242	7.80756	2.96487	0.245277	0.464781
ENSMUSG00000042254	Cilp	417.47	95.7717	739.168	7.71803	2.94823	2.16443e-77	6.63579e-75
ENSMUSG00000057058	Skap1	7.28907	1.67239	12.9058	7.71696	2.94803	0.000194491	0.0011788
ENSMUSG00000020395	Itk	15.7137	3.62438	27.8031	7.67114	2.93944	2.03367e-06	1.80069e-05
ENSMUSG00000040797	Iqsec3	154.404	35.7777	273.03	7.63131	2.93193	6.78166e-42	6.83554e-40
ENSMUSG00000022226	Mcpt2	5.15855	1.19714	9.11996	7.61811	2.92943	0.00614957	0.0247344
ENSMUSG00000079563	Pglyrp2	2.66058	0.619561	4.70161	7.58861	2.92384	0.0579853	0.1608
ENSMUSG00000040536	Necab1	180.692	42.2566	319.127	7.55212	2.91688	8.26538e-47	9.75668e-45
ENSMUSG00000037010	Apln	5580.01	1309.11	9850.92	7.52493	2.91168	1.05119e-159	1.36494e-156
ENSMUSG00000082287	Gm15333	3.04029	0.717382	5.3632	7.47607	2.90228	0.0872723	0.220065
ENSMUSG00000085591	Gm13479	140.603	33.3702	247.835	7.42683	2.89275	1.0734e-38	9.55409e-37
ENSMUSG00000092371	Gm20511	5.33491	1.27941	9.3904	7.33962	2.87571	0.00581138	0.023542
ENSMUSG00000086249	Gm12724	2.89729	0.701831	5.09276	7.25638	2.85925	0.0902491	0.225792
ENSMUSG00000044701	Il27	1.75804	0.428592	3.08748	7.20378	2.84875	0.169285	0.358549
ENSMUSG00000054758	Gm9956	33.728	8.2484	59.2077	7.17808	2.8436	1.61645e-11	2.77894e-10
ENSMUSG00000024028	Tff2	0.842712	0.20652	1.4789	7.16106	2.84017	0.322449	0.55843
ENSMUSG00000083548	Gm11514	0.842712	0.20652	1.4789	7.16106	2.84017	0.322449	0.55843
ENSMUSG00000028386	Slc46a2	38.4966	9.46278	67.5304	7.13642	2.8352	1.91203e-12	3.54971e-11
ENSMUSG00000073405	C920025E04Rik	2.83502	0.701831	4.96821	7.07892	2.82353	0.119762	0.279129
ENSMUSG00000094420		1.99337	0.495311	3.49144	7.04898	2.81741	0.121228	0.281534
ENSMUSG00000057818	1600029O15Rik	7.05474	1.76553	12.3439	6.99162	2.80563	0.00993756	0.0371485
ENSMUSG00000094212		1.15258	0.288791	2.01638	6.98214	2.80367	0.169413	0.358746
ENSMUSG00000019932	Kera	1.14981	0.288791	2.01083	6.96292	2.79969	0.287923	0.518783
ENSMUSG00000035580	Kcnh8	2.45946	0.619561	4.29935	6.93936	2.7948	0.100911	0.245916
ENSMUSG00000035638	Muc20	1.68765	0.428592	2.94671	6.87533	2.78143	0.294848	0.527224
ENSMUSG00000041193	Pla2g5	685.381	174.319	1196.44	6.8635	2.77895	6.79343e-95	3.06037e-92
ENSMUSG00000089571		1.99837	0.510862	3.48589	6.82354	2.77052	0.209173	0.416911
ENSMUSG00000005763	Cd247	45.2179	11.6086	78.8272	6.79043	2.7635	2.35844e-14	5.1647e-13
ENSMUSG00000089776	Gm15684	11.7727	3.03407	20.5114	6.76034	2.7571	0.000462826	0.0025573
ENSMUSG00000085629	Gm11697	4.38104	1.13042	7.63166	6.75116	2.75513	0.0950689	0.234895
ENSMUSG00000056290	Ms4a4b	38.7703	10.0342	67.5065	6.72767	2.75011	8.19702e-12	1.44753e-10
ENSMUSG00000090827	Gm8297	2.69617	0.701831	4.6905	6.68324	2.74055	0.161464	0.347114
ENSMUSG00000084807	Gm13073	1.69905	0.444143	2.95397	6.65093	2.73356	0.223705	0.4374
ENSMUSG00000093562		1.62281	0.428592	2.81704	6.57278	2.7165	0.176453	0.368952
ENSMUSG00000048215	A630023P12Rik	11.1436	2.95816	19.329	6.53411	2.70799	0.000200952	0.00121529
ENSMUSG00000058488	Kl	4.09687	1.08844	7.10529	6.52793	2.70663	0.0380079	0.114319
ENSMUSG00000020264	Slc36a2	634.048	168.917	1099.18	6.50723	2.70204	1.70715e-84	6.17764e-82
ENSMUSG00000040610	Tlx3	0.775101	0.20652	1.34368	6.5063	2.70184	0.331966	0.569416
ENSMUSG00000093314	Mir5136	1.54551	0.41304	2.67797	6.48356	2.69679	0.399797	0.643502
ENSMUSG00000024210	Ip6k3	876.296	235.514	1517.08	6.44156	2.68741	3.11106e-97	1.59706e-94
ENSMUSG00000023041	Krt6b	8.7626	2.35867	15.1665	6.43012	2.68485	0.00149441	0.00727081
ENSMUSG00000015829	Tnr	58.6281	15.7841	101.472	6.42876	2.68454	1.36417e-16	3.56787e-15
ENSMUSG00000050424	Pnma5	9.22269	2.50766	15.9377	6.35562	2.66803	0.00977266	0.0366189
ENSMUSG00000038194	Lhb	1.63144	0.444143	2.81874	6.34648	2.66596	0.227426	0.442426
ENSMUSG00000029417	Cxcl9	69.0467	19.0202	119.073	6.26036	2.64625	1.55547e-18	4.58418e-17
ENSMUSG00000073051	Gm14812	3.11104	0.857183	5.36491	6.25876	2.64588	0.170291	0.360403
ENSMUSG00000052468	Pmp2	1.7914	0.495311	3.08748	6.23342	2.64002	0.167625	0.356023
ENSMUSG00000061068	Mcpt4	119.577	33.1497	206.004	6.21435	2.6356	1.5614e-27	7.9233e-26
ENSMUSG00000078664	Sprr2a1	7.48451	2.07907	12.89	6.19988	2.63224	0.00012976	0.000815582
ENSMUSG00000087476	1810058N05Rik	1.48515	0.41304	2.55726	6.19132	2.63025	0.236137	0.453311
ENSMUSG00000037944	Ccr7	36.2452	10.2097	62.2807	6.10012	2.60884	6.05813e-11	9.76824e-10
ENSMUSG00000029359	Tesc	1545.35	435.561	2655.14	6.09591	2.60784	3.56714e-107	2.38609e-104
ENSMUSG00000089722	Gm11711	2.35034	0.666214	4.03446	6.0558	2.59832	0.0646772	0.175026
ENSMUSG00000076612	Ighg2c	1.01822	0.288791	1.74764	6.05158	2.59731	0.23235	0.448544
ENSMUSG00000031654	Cbln1	11.1037	3.15832	19.0491	6.03141	2.59249	0.00064812	0.0034582
ENSMUSG00000020591	Ntsr2	70.8658	20.2347	121.497	6.00438	2.58601	6.25975e-20	2.0084e-18
ENSMUSG00000092094	Zfp804b	11.666	3.33374	19.9982	5.99874	2.58466	0.000111351	0.000709986
ENSMUSG00000046240	Hepacam	5.79321	1.65684	9.92958	5.9931	2.5833	0.0107191	0.0397402
ENSMUSG00000021456	Fbp2	1254.7	359.078	2150.31	5.98843	2.58218	6.34812e-100	3.59303e-97
ENSMUSG00000094433		2.50196	0.717382	4.28655	5.97526	2.579	0.21886	0.43081
ENSMUSG00000048482	Bdnf	128.347	36.8097	219.885	5.97356	2.57859	1.1221e-31	6.78608e-30
ENSMUSG00000021991	Cacna2d3	42.7379	12.284	73.1918	5.95832	2.5749	7.30719e-13	1.40872e-11
ENSMUSG00000055547	Apobec4	1.72186	0.495311	2.94841	5.95265	2.57353	0.39191	0.635233
ENSMUSG00000034648	Lrrn1	137.142	39.4511	234.834	5.95252	2.5735	3.83627e-29	2.08576e-27
ENSMUSG00000090942	F830016B08Rik	46.07	13.2967	78.8434	5.92956	2.56792	2.08679e-13	4.23381e-12
ENSMUSG00000094370		2.90599	0.841632	4.97034	5.9056	2.56208	0.0659911	0.177645
ENSMUSG00000084839	Gm14097	18.5314	5.39725	31.6656	5.86699	2.55262	8.69002e-06	6.91256e-05
ENSMUSG00000014686	Ceacam16	8.5612	2.49847	14.6239	5.85316	2.54922	0.00190435	0.00898989
ENSMUSG00000051504	Siglech	3.54757	1.04815	6.047	5.7692	2.52837	0.0415344	0.122686
ENSMUSG00000080768	Gm12219	9.05787	2.68944	15.4263	5.73588	2.52002	0.00256128	0.0115643
ENSMUSG00000030365	Clec2i	11.1952	3.32455	19.0658	5.73484	2.51975	0.000369047	0.00208506
ENSMUSG00000022657	Cd96	7.97119	2.38058	13.5618	5.69684	2.51016	0.00271201	0.0121603
ENSMUSG00000087825		2.12448	0.635112	3.61385	5.6901	2.50845	0.394072	0.637458
ENSMUSG00000043811	Rtn4r	432.575	129.678	735.473	5.67154	2.50374	4.77762e-66	1.06526e-63
ENSMUSG00000084951	Gm15919	6.40225	1.93008	10.8744	5.6342	2.49421	0.0112752	0.041447
ENSMUSG00000079388	2610042L04Rik	6.16862	1.86336	10.4739	5.62098	2.49082	0.0240049	0.0785131
ENSMUSG00000059408	Mrgprh	93.585	28.405	158.765	5.58932	2.48267	1.18559e-19	3.72802e-18
ENSMUSG00000081522	Gm13170	0.951458	0.288791	1.61413	5.58926	2.48266	0.308767	0.542848
ENSMUSG00000074240	Cib3	2.13866	0.650663	3.62666	5.57379	2.47866	0.179379	0.372934
ENSMUSG00000026424	Gpr37l1	6.96675	2.12104	11.8124	5.56916	2.47746	0.00469665	0.0196055
ENSMUSG00000092806		2.13503	0.650663	3.6194	5.56264	2.47577	0.231261	0.447323
ENSMUSG00000081873	Gm15197	2.30139	0.701831	3.90095	5.55824	2.47463	0.0830686	0.212302
ENSMUSG00000076606	Igkj3	2.29584	0.701831	3.88985	5.54242	2.47052	0.225549	0.439758
ENSMUSG00000052482	Gm8174	1.35078	0.41304	2.28853	5.54069	2.47007	0.314464	0.550037
ENSMUSG00000030468	Siglecg	50.1924	15.3555	85.0293	5.53738	2.4692	2.98619e-11	4.98617e-10
ENSMUSG00000064845		8.79232	2.69411	14.8905	5.52706	2.46651	0.00363052	0.0156646
ENSMUSG00000028492	Fam154a	1.66566	0.510862	2.82045	5.52096	2.46492	0.295993	0.528323
ENSMUSG00000096410		1.3463	0.41304	2.27956	5.51898	2.4644	0.314759	0.550224
ENSMUSG00000067063	Gm6990	58.8537	18.0652	99.6423	5.51571	2.46355	1.65649e-15	4.02259e-14
ENSMUSG00000081209	Gm14890	115.493	35.463	195.524	5.51345	2.46296	3.71124e-25	1.66508e-23
ENSMUSG00000089829	Gm16565	31.9656	9.82128	54.1098	5.50945	2.46191	1.16452e-09	1.61874e-08
ENSMUSG00000085813	Gm15870	3.41043	1.04815	5.77271	5.50751	2.4614	0.0860811	0.217808
ENSMUSG00000010064	Slc38a3	2286.82	704.884	3868.76	5.48851	2.45641	1.66181e-102	9.65336e-100
ENSMUSG00000092188	Gm20471	6.42506	1.98124	10.8689	5.48589	2.45572	0.0181066	0.0619859
ENSMUSG00000029727	Cyp3a13	22.9413	7.07883	38.8038	5.48167	2.45462	3.37319e-07	3.36465e-06
ENSMUSG00000076617	Ighm	408.945	126.289	691.602	5.47635	2.45321	3.32947e-57	5.69726e-55
ENSMUSG00000024011	Pi16	2229.71	690.706	3768.71	5.45632	2.44793	1.0051e-104	5.99639e-102
ENSMUSG00000094777	Hist1h2ap	9.82405	3.04495	16.6032	5.45269	2.44697	0.0205387	0.0690693
ENSMUSG00000085992	Gm11515	1.59305	0.495311	2.69078	5.4325	2.44162	0.178133	0.371339
ENSMUSG00000028217	Cdh17	4.13155	1.28577	6.97733	5.42655	2.44004	0.0673069	0.180313
ENSMUSG00000085643	Gm12519	194.469	60.5267	328.411	5.42588	2.43986	7.82115e-38	6.56441e-36
ENSMUSG00000040485	Lrrc52	87.222	27.2	147.244	5.41338	2.43653	4.7123e-21	1.6127e-19
ENSMUSG00000038801	Scgb1c1	192.249	60.2607	324.237	5.38058	2.42776	7.03021e-35	5.00597e-33
ENSMUSG00000090260	2810442N19Rik	5.89147	1.84781	9.93513	5.37672	2.42673	0.00997369	0.0372709
ENSMUSG00000093508		2.54588	0.799653	4.2921	5.36745	2.42424	0.127382	0.292441
ENSMUSG00000040680	Kremen2	2.62585	0.826081	4.42561	5.35736	2.42152	0.143005	0.31799
ENSMUSG00000023034	Nr4a1	7100.7	2238.15	11963.3	5.34514	2.41823	4.66831e-120	3.55339e-117
ENSMUSG00000055546	Timd4	19.3696	6.121	32.6182	5.3289	2.41384	7.72753e-06	6.18035e-05
ENSMUSG00000022595	Lypd2	8.77472	2.7809	14.7685	5.31071	2.40891	0.00058442	0.00314493
ENSMUSG00000007888	Crlf1	7.98034	2.5324	13.4283	5.30259	2.4067	0.0014444	0.00706171
ENSMUSG00000021779	Thrb	627.038	199.517	1054.56	5.28556	2.40206	3.00581e-69	7.29124e-67
ENSMUSG00000028747	Htr6	3.50307	1.11487	5.89128	5.28427	2.4017	0.376058	0.61847
ENSMUSG00000075027	4631405J19Rik	1220.04	388.78	2051.3	5.27625	2.39951	2.32494e-85	8.55346e-83
ENSMUSG00000047619	Ddi1	2.87759	0.923903	4.83128	5.22921	2.38659	0.136762	0.307913
ENSMUSG00000001027	Scn4a	504.579	162.014	847.145	5.22884	2.38649	1.27467e-63	2.55791e-61
ENSMUSG00000024532	1700034E13Rik	2.07328	0.666214	3.48034	5.22405	2.38517	0.52152	0.752759
ENSMUSG00000086917	Gm11630	1.92113	0.619561	3.2227	5.20159	2.37895	0.239627	0.457533
ENSMUSG00000020907	Rcvrn	1.27954	0.41304	2.14605	5.19574	2.37733	0.413568	0.65592
ENSMUSG00000085675	Gm12022	5.92483	1.91452	9.93513	5.18935	2.37555	0.00989801	0.0370257
ENSMUSG00000052013	Btla	46.6715	15.104	78.2389	5.18	2.37295	5.31848e-11	8.65843e-10
ENSMUSG00000047013	Fbxo41	2.00429	0.650663	3.35792	5.16077	2.36759	0.236263	0.453319
ENSMUSG00000046345	2310010M20Rik	233.161	75.7964	390.526	5.1523	2.36522	1.57472e-37	1.29221e-35
ENSMUSG00000073375	Lrrc30	7.30886	2.3851	12.2326	5.12878	2.35862	0.00601359	0.0242765
ENSMUSG00000080784	Gm13765	0.883848	0.288791	1.4789	5.12102	2.35643	0.317054	0.552685
ENSMUSG00000084597		0.883848	0.288791	1.4789	5.12102	2.35643	0.317054	0.552685
ENSMUSG00000085898	Gm6689	0.883848	0.288791	1.4789	5.12102	2.35643	0.317054	0.552685
ENSMUSG00000089949	Gm16137	0.883848	0.288791	1.4789	5.12102	2.35643	0.317054	0.552685
ENSMUSG00000015085	Entpd2	482.182	157.922	806.443	5.1066	2.35236	1.69431e-59	3.09093e-57
ENSMUSG00000048478	4732415M23Rik	350.714	114.886	586.543	5.10543	2.35203	2.2572e-48	2.88009e-46
ENSMUSG00000086041	Gm12869	4.5702	1.50148	7.63892	5.08758	2.34698	0.102911	0.249551
ENSMUSG00000030513	Pcsk6	6374.13	2094.88	10653.4	5.08543	2.34637	7.41952e-112	5.11808e-109
ENSMUSG00000021281	Tnfaip2	3298.5	1085.88	5511.12	5.07524	2.34348	3.74551e-106	2.43172e-103
ENSMUSG00000094651	Gal3st2	37.2048	12.2748	62.1348	5.06198	2.3397	2.57547e-09	3.41857e-08
ENSMUSG00000087406	E130215H24Rik	21.1222	6.97182	35.2727	5.05932	2.33894	9.07198e-06	7.19306e-05
ENSMUSG00000087248	Gm16120	4.66798	1.54346	7.7925	5.04871	2.33592	0.0433684	0.127032
ENSMUSG00000002033	Cd3g	8.4583	2.80281	14.1138	5.03558	2.33216	0.00149016	0.00725174
ENSMUSG00000045509	Gpr150	2.49148	0.826081	4.15688	5.03204	2.33114	0.185834	0.382358
ENSMUSG00000092553	Gm20428	2.98219	0.990622	4.97376	5.02084	2.32793	0.104759	0.252783
ENSMUSG00000085839	Gm15949	1.2901	0.428592	2.1516	5.02016	2.32773	0.249385	0.469785
ENSMUSG00000089188		1.28732	0.428592	2.14605	5.00721	2.32401	0.413129	0.655412
ENSMUSG00000053199	Arhgap20	457.893	152.461	763.325	5.00667	2.32385	4.55817e-55	7.34431e-53
ENSMUSG00000032226	Gcnt3	2.66143	0.888286	4.43458	4.99229	2.3197	0.14208	0.316572
ENSMUSG00000088602		4.20053	1.40366	6.99739	4.9851	2.31762	0.0263758	0.0848345
ENSMUSG00000087500	Gm12426	39.4866	13.2172	65.7559	4.97501	2.3147	6.46816e-10	9.38096e-09
ENSMUSG00000037143	4930529M08Rik	70.2668	23.528	117.006	4.97303	2.31413	2.14123e-15	5.16e-14
ENSMUSG00000027762	Sucnr1	9.20415	3.0916	15.3167	4.95429	2.30868	0.000966284	0.00492398
ENSMUSG00000030048	Gkn3	22.0357	7.43151	36.6398	4.93033	2.30168	3.62907e-06	3.06928e-05
ENSMUSG00000032053	Pou2af1	33.4157	11.2905	55.5409	4.91925	2.29844	1.85306e-07	1.92764e-06
ENSMUSG00000000247	Lhx2	7.60184	2.57606	12.6276	4.9019	2.29334	0.00647986	0.0259077
ENSMUSG00000056258	Kcnq3	1.69816	0.577582	2.81874	4.88025	2.28696	0.223753	0.4374
ENSMUSG00000079175	Gm11060	1.45505	0.495311	2.41479	4.87529	2.28549	0.307881	0.5417
ENSMUSG00000086945	4930562A09Rik	1.21279	0.41304	2.01253	4.87249	2.28466	0.547411	0.774142
ENSMUSG00000083356	Gm11708	1.45227	0.495311	2.40923	4.86408	2.28217	0.540003	0.768192
ENSMUSG00000070111	Gm10286	1.8613	0.635112	3.08748	4.86132	2.28135	0.242142	0.460701
ENSMUSG00000070306	Ccdc153	2.51151	0.857183	4.16584	4.85992	2.28093	0.185267	0.381527
ENSMUSG00000022129	Dct	473.152	161.784	784.52	4.8492	2.27775	7.77284e-55	1.24332e-52
ENSMUSG00000031933	Folr4	1.29787	0.444143	2.1516	4.84439	2.27631	0.248817	0.469265
ENSMUSG00000023336	Wfdc1	1551.66	531.355	2571.97	4.8404	2.27512	2.10202e-83	7.24999e-81
ENSMUSG00000014453	Blk	555.863	190.428	921.297	4.83803	2.27442	3.61309e-61	6.93524e-59
ENSMUSG00000086596	Susd5	82.6535	28.3323	136.975	4.83458	2.27339	1.63608e-15	3.98178e-14
ENSMUSG00000067242	Lgi1	27.3807	9.40808	45.3533	4.82067	2.26923	2.33174e-06	2.04169e-05
ENSMUSG00000000627	Sema4f	15.4616	5.31514	25.608	4.81793	2.26841	0.000347392	0.00197739
ENSMUSG00000036594	H2-Aa	114.34	39.3828	189.298	4.8066	2.26502	1.38657e-20	4.60952e-19
ENSMUSG00000063646	Jakmip1	8.58715	2.95816	14.2161	4.80573	2.26476	0.00957274	0.0360288
ENSMUSG00000022096	Hr	860.118	296.685	1423.55	4.79819	2.26249	8.31783e-72	2.26676e-69
ENSMUSG00000095142		2.27299	0.784102	3.76188	4.7977	2.26234	0.174576	0.36673
ENSMUSG00000076490	Trbc1	11.7603	4.07303	19.4475	4.7747	2.25541	0.00434143	0.0183307
ENSMUSG00000092216	Gm19345	4.54276	1.57457	7.51095	4.77018	2.25404	0.111111	0.264068
ENSMUSG00000084678		2.11133	0.732934	3.48973	4.76132	2.25136	0.141308	0.315233
ENSMUSG00000032291	Crabp1	3.01288	1.04815	4.9776	4.74893	2.2476	0.074335	0.19511
ENSMUSG00000063600	Egfem1	9.26935	3.2314	15.3073	4.73705	2.24399	0.00404737	0.0172308
ENSMUSG00000051052	Olfr335-ps	3.00177	1.04815	4.9554	4.72775	2.24115	0.488046	0.724583
ENSMUSG00000027188	Pamr1	783.035	273.966	1292.1	4.71628	2.23765	4.46352e-67	1.01575e-64
ENSMUSG00000093751	Gm3307	1.22056	0.428592	2.01253	4.69569	2.23134	0.547154	0.774016
ENSMUSG00000028009	1700061I17Rik	1.21971	0.428592	2.01083	4.69171	2.23011	0.417032	0.658952
ENSMUSG00000086952	Gm12596	1.21971	0.428592	2.01083	4.69171	2.23011	0.417032	0.658952
ENSMUSG00000024673	Ms4a1	67.2005	23.6805	110.721	4.67559	2.22515	1.08571e-13	2.24822e-12
ENSMUSG00000025784	Clec3b	1255.66	442.54	2068.78	4.67478	2.2249	2.26533e-81	7.35367e-79
ENSMUSG00000020961	Ston2	165.656	58.4244	272.888	4.67079	2.22367	7.42429e-30	4.12805e-28
ENSMUSG00000000392	Fap	791.824	280.245	1303.4	4.65095	2.21752	2.59521e-67	5.96736e-65
ENSMUSG00000095881	Gm10929	1.63055	0.577582	2.68352	4.64613	2.21603	0.227476	0.442445
ENSMUSG00000095881	Gm10596	1.63055	0.577582	2.68352	4.64613	2.21603	0.227476	0.442445
ENSMUSG00000095881	Gm10592	1.63055	0.577582	2.68352	4.64613	2.21603	0.227476	0.442445
ENSMUSG00000082187	Gm13670	2.608	0.923903	4.2921	4.64562	2.21587	0.182604	0.377593
ENSMUSG00000041798	Gck	54.693	19.4086	89.9775	4.63595	2.21286	1.06157e-09	1.4916e-08
ENSMUSG00000022416	Cacna1i	7.26506	2.58074	11.9494	4.63021	2.21108	0.0116852	0.0427073
ENSMUSG00000056973	Ces1d	83.0022	29.5249	136.48	4.62252	2.20868	1.09343e-15	2.68779e-14
ENSMUSG00000027338	Prnd	4325.39	1540.29	7110.48	4.61631	2.20674	1.86702e-95	8.95927e-93
ENSMUSG00000086248	Gm16127	2.86615	1.02172	4.71057	4.61041	2.2049	0.0843835	0.214793
ENSMUSG00000094503	Gm14693	1.38829	0.495311	2.28127	4.60573	2.20343	0.407634	0.650482
ENSMUSG00000096197	4930555G01Rik	2.86252	1.02172	4.70331	4.60331	2.20267	0.10734	0.257336
ENSMUSG00000002500	Rpl3l	993.709	355.912	1631.51	4.58402	2.19661	1.58195e-70	4.20722e-68
ENSMUSG00000023274	Cd4	87.3553	31.2888	143.422	4.58381	2.19655	1.67567e-15	4.06469e-14
ENSMUSG00000027313	Chac1	54.1229	19.3986	88.8471	4.58008	2.19537	2.36785e-12	4.36658e-11
ENSMUSG00000028780	Sema3c	3022.56	1083.65	4961.46	4.57848	2.19487	5.07683e-95	2.33471e-92
ENSMUSG00000048458	6530418L21Rik	6867.42	2464.8	11270	4.57239	2.19295	1.02939e-97	5.41018e-95
ENSMUSG00000021566	5430425J12Rik	2.0418	0.732934	3.35067	4.57158	2.19269	0.303705	0.537911
ENSMUSG00000029120	Ppp2r2c	18.0625	6.49206	29.633	4.5645	2.19046	0.000312752	0.00180209
ENSMUSG00000094628	Gm3252	48.1824	17.3505	79.0144	4.55402	2.18714	2.88956e-10	4.32435e-09
ENSMUSG00000032942	Ucp3	5341.1	1925.39	8756.8	4.54808	2.18526	1.30817e-99	7.21912e-97
ENSMUSG00000045232	Rln3	1.14518	0.41304	1.87731	4.54511	2.18431	0.549689	0.775555
ENSMUSG00000089631	Gm16326	5.65231	2.03877	9.26585	4.54482	2.18422	0.036512	0.110412
ENSMUSG00000037600	1810019J16Rik	1.23026	0.444143	2.01638	4.53993	2.18267	0.253885	0.476067
ENSMUSG00000085382	Gm13861	9.25942	3.34293	15.1759	4.53971	2.1826	0.00147773	0.00720554
ENSMUSG00000088068		5.56634	2.01871	9.11398	4.51476	2.17465	0.14061	0.313993
ENSMUSG00000042828	Trim72	6553.75	2380.47	10727	4.50626	2.17193	4.08667e-95	1.91934e-92
ENSMUSG00000026202	Tuba4a	20593	7488.08	33697.9	4.50021	2.16999	3.93172e-97	1.97247e-94
ENSMUSG00000040328	Olfr56	18.6219	6.77166	30.4721	4.49995	2.16991	6.85386e-05	0.000457214
ENSMUSG00000026011	Ctla4	14.7755	5.38355	24.1675	4.48914	2.16644	0.000315428	0.00181322
ENSMUSG00000042476	Abcb4	290.868	106.002	475.735	4.48799	2.16607	1.22097e-37	1.0209e-35
ENSMUSG00000030724	Cd19	80.9371	29.5276	132.347	4.48213	2.16419	4.15368e-17	1.12639e-15
ENSMUSG00000024610	Cd74	398.435	145.589	651.281	4.47341	2.16137	4.60448e-45	5.03165e-43
ENSMUSG00000003545	Fosb	118.858	43.4458	194.269	4.47153	2.16077	4.51737e-21	1.54839e-19
ENSMUSG00000086967	4930566F21Rik	3.60826	1.32139	5.89512	4.4613	2.15746	0.231918	0.448029
ENSMUSG00000065651		3.12214	1.14597	5.09831	4.44888	2.15344	0.114443	0.270038
ENSMUSG00000051969	Tlr11	1.72885	0.635112	2.82259	4.44424	2.15194	0.156859	0.339927
ENSMUSG00000059027	9630013D21Rik	287.11	105.894	468.326	4.4226	2.1449	1.42473e-38	1.25297e-36
ENSMUSG00000043629	1700019D03Rik	137.466	50.8556	224.076	4.40612	2.13951	4.51617e-23	1.74283e-21
ENSMUSG00000000889	Dbh	297.14	109.956	484.323	4.40469	2.13904	1.52815e-37	1.25867e-35
ENSMUSG00000050921	P2ry10	10.799	3.99995	17.598	4.39954	2.13735	0.00102011	0.00517296
ENSMUSG00000073057	Gm10462	1.15295	0.428592	1.87731	4.38019	2.13099	0.549422	0.775296
ENSMUSG00000021678	F2rl1	160.724	59.81	261.638	4.37449	2.12911	1.31755e-24	5.6146e-23
ENSMUSG00000057716	Gm5567	3.55068	1.32139	5.77997	4.37415	2.129	0.0930083	0.231045
ENSMUSG00000092200	Tnxa	23.7005	8.84154	38.5594	4.36116	2.12471	1.12266e-06	1.03299e-05
ENSMUSG00000060924	Csmd1	10.4051	3.88489	16.9253	4.35669	2.12323	0.000833843	0.00431958
ENSMUSG00000058470	Gm8369	2.80449	1.04815	4.56083	4.35131	2.12145	0.190027	0.388574
ENSMUSG00000089844	A530032D15Rik	4.12688	1.54346	6.7103	4.34756	2.12021	0.145395	0.321783
ENSMUSG00000038421	Fcrla	25.0845	9.38519	40.7839	4.34556	2.11954	1.77135e-05	0.000132815
ENSMUSG00000081712	Gm12096	35.5742	13.3121	57.8363	4.34465	2.11924	7.30397e-07	6.91372e-06
ENSMUSG00000086844	B230206H07Rik	3.38902	1.27022	5.50782	4.3361	2.1164	0.076657	0.199826
ENSMUSG00000094841	Gm10610	1.32068	0.495311	2.14605	4.33273	2.11528	0.411271	0.653564
ENSMUSG00000079507	H2-Q1	1.64877	0.619561	2.67797	4.32237	2.11182	0.527966	0.758695
ENSMUSG00000041567	Serpina12	13.5677	5.09943	22.036	4.32126	2.11145	0.000370222	0.00209117
ENSMUSG00000021298	Gpr132	25.3984	9.55441	41.2425	4.31659	2.10989	1.50646e-06	1.36453e-05
ENSMUSG00000095612		1.90051	0.717382	3.08364	4.29845	2.10382	0.524066	0.755304
ENSMUSG00000063297	Luzp2	3.38892	1.27941	5.49842	4.29761	2.10354	0.178092	0.371289
ENSMUSG00000095681	Gm8281	108.523	40.9975	176.049	4.29415	2.10237	7.60184e-18	2.14308e-16
ENSMUSG00000070570	Slc17a7	299.387	113.203	485.57	4.28937	2.10077	4.88595e-35	3.52459e-33
ENSMUSG00000087630	Gm11513	5.04354	1.91452	8.17255	4.26871	2.0938	0.222719	0.436144
ENSMUSG00000076934	Iglv1	4.06119	1.54346	6.57892	4.26244	2.09168	0.0748959	0.196278
ENSMUSG00000093805	Gm9994	18.9911	7.23587	30.7464	4.24917	2.08718	6.53152e-05	0.000438761
ENSMUSG00000088768		1.1635	0.444143	1.88286	4.23932	2.08383	0.32768	0.564553
ENSMUSG00000023011	Faim2	3.56549	1.36168	5.76929	4.23688	2.083	0.0521116	0.147438
ENSMUSG00000027072	Prg3	1.08119	0.41304	1.74935	4.2353	2.08246	0.42565	0.666889
ENSMUSG00000015316	Slamf1	8.29404	3.1692	13.4189	4.23416	2.08208	0.025241	0.0817685
ENSMUSG00000064567		1.66209	0.635112	2.68907	4.23401	2.08203	0.199657	0.403205
ENSMUSG00000037206	Islr	2374.6	908.243	3840.96	4.229	2.08032	1.18743e-78	3.74449e-76
ENSMUSG00000089404		1.66017	0.635112	2.68523	4.22796	2.07996	0.40806	0.650832
ENSMUSG00000048483	Zdhhc22	1.16073	0.444143	1.87731	4.22682	2.07957	0.549157	0.775185
ENSMUSG00000033498	Strc	2.73774	1.04815	4.42732	4.22393	2.07859	0.240988	0.459217
ENSMUSG00000058656	Samd12	13.6843	5.24092	22.1276	4.22209	2.07796	0.00295408	0.0130993
ENSMUSG00000042371	Slc5a10	1.07757	0.41304	1.74209	4.21772	2.07646	0.552054	0.776874
ENSMUSG00000093800		1.07757	0.41304	1.74209	4.21772	2.07646	0.552054	0.776874
ENSMUSG00000095078		1.07757	0.41304	1.74209	4.21772	2.07646	0.552054	0.776874
ENSMUSG00000073966	Olfr561	4.64239	1.78109	7.5037	4.21299	2.07484	0.18102	0.375267
ENSMUSG00000085830	E130003G02Rik	2.90546	1.11487	4.69606	4.21219	2.07457	0.1878	0.385348
ENSMUSG00000085926	Gm12299	1.32846	0.510862	2.14605	4.20084	2.07068	0.410844	0.653297
ENSMUSG00000050217	Lgsn	2.57183	0.990622	4.15303	4.19235	2.06776	0.389204	0.632217
ENSMUSG00000019772	Vip	21.2757	8.20191	34.3496	4.188	2.06626	3.95418e-05	0.000277977
ENSMUSG00000084543		1.49704	0.577582	2.41649	4.18381	2.06482	0.402126	0.645604
ENSMUSG00000045246	Kcng4	7.3247	2.82755	11.8218	4.18095	2.06383	0.00313404	0.0137838
ENSMUSG00000070777	Ceacam20	1.49341	0.577582	2.40923	4.17124	2.06048	0.538828	0.767176
ENSMUSG00000003379	Cd79a	86.1449	33.3291	138.961	4.16936	2.05983	1.04808e-13	2.17641e-12
ENSMUSG00000069763	Tmem100	2580.16	999.33	4161	4.16379	2.0579	1.24763e-78	3.8789e-76
ENSMUSG00000038457	Fam70b	391.636	151.731	631.541	4.16224	2.05736	3.13364e-40	3.02061e-38
ENSMUSG00000045875	Adra1a	65.0942	25.2691	104.919	4.15208	2.05383	1.68212e-14	3.72803e-13
ENSMUSG00000041538	H2-Ob	60.9681	23.6735	98.2627	4.15075	2.05337	4.65746e-12	8.34486e-11
ENSMUSG00000028919	Arhgef19	940.825	365.997	1515.65	4.14116	2.05004	3.01126e-65	6.34301e-63
ENSMUSG00000054885	4930578G10Rik	2.33341	0.908351	3.75847	4.13768	2.04882	0.151188	0.330952
ENSMUSG00000042401	Crtac1	6.08004	2.36786	9.79223	4.13548	2.04805	0.0543799	0.152604
ENSMUSG00000092051	Gm17229	15.583	6.06983	25.0961	4.13457	2.04774	0.000695067	0.00368112
ENSMUSG00000063063	Ctnna2	6.83655	2.66301	11.0101	4.13445	2.0477	0.0101105	0.0377438
ENSMUSG00000094544		2.5796	1.00617	4.15303	4.12755	2.04529	0.389063	0.632042
ENSMUSG00000093189		1.58841	0.619561	2.55726	4.12755	2.04528	0.321833	0.557888
ENSMUSG00000085562	2610028E06Rik	3.58733	1.40366	5.771	4.11139	2.03963	0.0924756	0.230013
ENSMUSG00000022860	Chodl	5.51394	2.1677	8.86019	4.08737	2.03117	0.0372371	0.112199
ENSMUSG00000034057	Gm239	91.9603	36.1956	147.725	4.0813	2.02903	8.89197e-14	1.85346e-12
ENSMUSG00000085594	Gm11551	47.6783	18.818	76.5386	4.06731	2.02407	1.62782e-09	2.20988e-08
ENSMUSG00000080254	Gm15380	1.08534	0.428592	1.74209	4.06469	2.02314	0.551778	0.776821
ENSMUSG00000081077	Gm13899	3.34592	1.32139	5.37046	4.06424	2.02299	0.1878	0.385348
ENSMUSG00000068196	Col8a1	892.14	352.74	1431.54	4.05835	2.02089	9.03046e-59	1.59743e-56
ENSMUSG00000069607	Cd300lh	12.3815	4.90564	19.8575	4.04789	2.01717	0.00242632	0.0110187
ENSMUSG00000091672	Gm17129	4.44459	1.76553	7.12365	4.03484	2.01251	0.0497788	0.1425
ENSMUSG00000016756	Cmah	295.068	117.357	472.78	4.02857	2.01027	1.46202e-34	1.02779e-32
ENSMUSG00000063286	Gm8995	161.39	64.2377	258.542	4.02477	2.00891	5.25702e-25	2.32552e-23
ENSMUSG00000081516	Gm12470	6.69981	2.66937	10.7302	4.01976	2.00711	0.0399515	0.118965
ENSMUSG00000083803	Gm12455	1.76029	0.701831	2.81874	4.01627	2.00586	0.314473	0.550037
ENSMUSG00000036412	Arsi	127.972	51.0825	204.861	4.01039	2.00374	3.85248e-19	1.17296e-17
ENSMUSG00000082738	Gm15422	2.34426	0.939454	3.74907	3.99069	1.99664	0.506609	0.739633
ENSMUSG00000035456	Prdm8	32.1948	12.9099	51.4797	3.98761	1.99553	3.98464e-08	4.56919e-07
ENSMUSG00000085512	Gm11958	5.78945	2.32757	9.25134	3.97469	1.99084	0.0742316	0.194884
ENSMUSG00000019235	Rps6kl1	402.591	162.204	642.978	3.96401	1.98696	4.59129e-39	4.15361e-37
ENSMUSG00000004948	Zp3	4.79005	1.93008	7.65002	3.96359	1.98681	0.0732918	0.19311
ENSMUSG00000022696	Sidt1	28.0007	11.3045	44.6968	3.95388	1.98327	2.49983e-05	0.000182297
ENSMUSG00000077278		1.2617	0.510862	2.01253	3.93948	1.97801	0.545815	0.772676
ENSMUSG00000067341	H2-Eb2	1.09675	0.444143	1.74935	3.93871	1.97772	0.424638	0.665725
ENSMUSG00000091942	Gm17138	1.09675	0.444143	1.74935	3.93871	1.97772	0.424638	0.665725
ENSMUSG00000096818		1.09675	0.444143	1.74935	3.93871	1.97772	0.424638	0.665725
ENSMUSG00000048875	Hdhd1a	1.76806	0.717382	2.81874	3.92921	1.97424	0.314155	0.549672
ENSMUSG00000012520	Phox2b	2.43938	0.990622	3.88814	3.92495	1.97267	0.238244	0.455759
ENSMUSG00000076999		3.20345	1.30133	5.10556	3.92335	1.97209	0.122253	0.28326
ENSMUSG00000042269	Fam92b	1.09312	0.444143	1.74209	3.92236	1.97172	0.551502	0.776809
ENSMUSG00000067261	Foxd3	10.4456	4.25313	16.6382	3.91199	1.9679	0.00757839	0.0295235
ENSMUSG00000096775		52.3146	21.3056	83.3235	3.91087	1.96749	2.30682e-08	2.73646e-07
ENSMUSG00000054196	Cthrc1	657.374	267.852	1046.89	3.90848	1.96661	6.44017e-52	9.17164e-50
ENSMUSG00000053353	2310001K24Rik	4.21799	1.72356	6.71243	3.89453	1.96145	0.0585996	0.162157
ENSMUSG00000036169	Sostdc1	3.54582	1.45032	5.64133	3.88972	1.95967	0.059755	0.164468
ENSMUSG00000087004	Gm14154	4.0492	1.65684	6.44156	3.88787	1.95898	0.18349	0.379105
ENSMUSG00000076939	Iglv3	2.11129	0.866372	3.35622	3.87387	1.95378	0.180401	0.374369
ENSMUSG00000037005	Xpnpep2	48.4873	19.91	77.0646	3.87065	1.95258	2.95428e-08	3.45406e-07
ENSMUSG00000086674	Gm12283	3.45604	1.41921	5.49287	3.87036	1.95247	0.373113	0.615232
ENSMUSG00000048498	Cd300e	7.85317	3.22504	12.4813	3.87012	1.95238	0.0200264	0.0676558
ENSMUSG00000027219	Slc28a2	4172.87	1720.07	6625.67	3.85198	1.9456	2.37943e-74	6.64856e-72
ENSMUSG00000082532	Rpl31-ps6	2.19904	0.908351	3.48973	3.84183	1.94179	0.194677	0.395664
ENSMUSG00000052135	Foxo6	295.508	122.305	468.711	3.83233	1.93822	5.88271e-32	3.60708e-30
ENSMUSG00000023473	Celsr3	94.1942	39.1114	149.277	3.81671	1.93233	9.53281e-15	2.18059e-13
ENSMUSG00000027346	Gpcpd1	15066.4	6256.72	23876	3.81605	1.93208	8.99329e-82	2.96295e-79
ENSMUSG00000086931	Gm14532	1.52858	0.635112	2.42204	3.81357	1.93114	0.324551	0.560977
ENSMUSG00000042116	Vwa1	2110.51	877.022	3343.99	3.8129	1.93089	5.76096e-66	1.25908e-63
ENSMUSG00000084616		9.92276	4.12872	15.7168	3.80671	1.92854	0.00655385	0.0261609
ENSMUSG00000095039		1.18909	0.495311	1.88286	3.80137	1.92652	0.325758	0.562131
ENSMUSG00000040037	Negr1	229.505	95.6917	363.319	3.79677	1.92477	8.57359e-28	4.39103e-26
ENSMUSG00000076609	Igkc	70.2459	29.3912	111.101	3.78007	1.91841	7.26072e-11	1.16478e-09
ENSMUSG00000073608	Gm6086	184.746	77.3109	292.18	3.77929	1.91812	7.12139e-24	2.88966e-22
ENSMUSG00000043168	4930426D05Rik	5.08344	2.12741	8.03946	3.779	1.918	0.147103	0.324131
ENSMUSG00000078234	Klhdc7a	237.07	99.2219	374.918	3.77858	1.91784	1.37614e-31	8.29969e-30
ENSMUSG00000051323	Pcdh19	1898.67	794.87	3002.47	3.77731	1.91736	1.81797e-67	4.22419e-65
ENSMUSG00000027209	4930525F21Rik	1.87266	0.784102	2.96122	3.77658	1.91708	0.241658	0.459978
ENSMUSG00000094065	Ccl21b	17.5554	7.3556	27.7553	3.77335	1.91585	0.00673553	0.0267603
ENSMUSG00000050822	Slc29a4	92.7183	38.8974	146.539	3.76733	1.91354	1.08953e-13	2.25401e-12
ENSMUSG00000048978	Nrsn1	1.02136	0.428592	1.61413	3.76612	1.91308	0.429656	0.671248
ENSMUSG00000084401	Gm12586	1.02136	0.428592	1.61413	3.76612	1.91308	0.429656	0.671248
ENSMUSG00000080408		3.13806	1.31688	4.95924	3.76591	1.913	0.299643	0.532639
ENSMUSG00000064476		2.0408	0.857183	3.22441	3.76163	1.91136	0.399507	0.643368
ENSMUSG00000020123	Avpr1a	49.8935	20.974	78.8131	3.75765	1.90983	3.33438e-09	4.36037e-08
ENSMUSG00000092572	Serpinb10	12.1441	5.10563	19.1826	3.75715	1.90964	0.0102577	0.0382805
ENSMUSG00000031637	Lrp2bp	234.631	98.892	370.37	3.7452	1.90504	8.6932e-29	4.65761e-27
ENSMUSG00000025900	Rp1	11.6539	4.93304	18.3747	3.72482	1.89717	0.00763579	0.0297009
ENSMUSG00000036596	Cpz	319.09	135.087	503.094	3.72422	1.89694	4.87879e-31	2.87185e-29
ENSMUSG00000030077	Chl1	25.5566	10.8321	40.281	3.71866	1.89478	1.34214e-05	0.000103084
ENSMUSG00000095024	Gm5458	1.53358	0.650663	2.41649	3.71389	1.89293	0.529807	0.760251
ENSMUSG00000091230	Gm6970	1.52995	0.650663	2.40923	3.70274	1.88859	0.688117	0.875299
ENSMUSG00000085033	Gm11646	6.55207	2.78726	10.3169	3.70145	1.88809	0.140384	0.313641
ENSMUSG00000042436	Mfap4	4159.96	1771.49	6548.44	3.69657	1.88619	2.69491e-70	6.91714e-68
ENSMUSG00000044303	Cdkn2a	10.4895	4.46884	16.5102	3.69452	1.88539	0.00615056	0.0247344
ENSMUSG00000026748	Plxdc2	1468.54	625.835	2311.24	3.69306	1.88481	1.90977e-59	3.45543e-57
ENSMUSG00000064409	n-R5s40	3.49728	1.4923	5.50226	3.68712	1.88249	0.153956	0.335431
ENSMUSG00000050132	Sarm1	6.82173	2.91151	10.7319	3.68604	1.88207	0.0622366	0.169821
ENSMUSG00000026726	Cubn	1148.34	490.423	1806.25	3.68304	1.8809	7.42419e-56	1.21394e-53
ENSMUSG00000029659	6330406I15Rik	806.503	344.514	1268.49	3.68198	1.88048	3.20293e-50	4.28493e-48
ENSMUSG00000031700	Gpt2	1537.78	656.974	2418.58	3.6814	1.88025	6.27237e-59	1.12566e-56
ENSMUSG00000081850	Gm15667	6.75201	2.88508	10.6189	3.68064	1.87995	0.00929628	0.035138
ENSMUSG00000035187	Nkx6-1	1.19409	0.510862	1.87731	3.67479	1.87766	0.548032	0.774522
ENSMUSG00000092346	Gm20424	4.00672	1.71437	6.29908	3.67429	1.87747	0.287299	0.518119
ENSMUSG00000027073	Prg2	5.10984	2.18961	8.03007	3.66735	1.87474	0.409377	0.651614
ENSMUSG00000025089	Gfra1	251.288	107.735	394.842	3.66493	1.87379	2.96875e-29	1.61808e-27
ENSMUSG00000032327	Stra6	3.41816	1.46587	5.37046	3.66367	1.87329	0.186596	0.383404
ENSMUSG00000095369		3.84404	1.65047	6.0376	3.6581	1.87109	0.179933	0.373785
ENSMUSG00000037660	Gdf7	1.70631	0.732934	2.67968	3.6561	1.8703	0.690235	0.876558
ENSMUSG00000046388	Gm9806	5.12865	2.20332	8.05398	3.65539	1.87003	0.0751044	0.196638
ENSMUSG00000040258	Nxph4	55.8183	23.997	87.6395	3.6521	1.86872	1.47024e-08	1.79404e-07
ENSMUSG00000040972	Igsf21	5.39498	2.32305	8.4669	3.64473	1.86581	0.0768701	0.200138
ENSMUSG00000075570	Krt26	1.02999	0.444143	1.61583	3.63809	1.86318	0.553772	0.77815
ENSMUSG00000084478		1.02999	0.444143	1.61583	3.63809	1.86318	0.553772	0.77815
ENSMUSG00000093256		5.64823	2.43626	8.86019	3.63679	1.86267	0.0636701	0.17283
ENSMUSG00000019936	Epyc	21.1812	9.13685	33.2255	3.63643	1.86252	0.0010771	0.00542748
ENSMUSG00000033579	Fa2h	1.62677	0.701831	2.55171	3.63579	1.86227	0.528315	0.758902
ENSMUSG00000070683	Lactbl1	1.02913	0.444143	1.61413	3.63425	1.86166	0.429125	0.670823
ENSMUSG00000021751	Acox2	2.65313	1.14597	4.16029	3.63035	1.86011	0.386429	0.629273
ENSMUSG00000034837	Gnat1	2.13814	0.923903	3.35237	3.62849	1.85937	0.50826	0.740893
ENSMUSG00000084249	Gm12267	2.13814	0.923903	3.35237	3.62849	1.85937	0.50826	0.740893
ENSMUSG00000082032	Gm12271	1.54135	0.666214	2.41649	3.6272	1.85886	0.529682	0.760232
ENSMUSG00000090095	Rpl29-ps1	1.62314	0.701831	2.54446	3.62545	1.85816	0.689299	0.876171
ENSMUSG00000065211		3.081	1.33243	4.82957	3.62464	1.85784	0.192412	0.392452
ENSMUSG00000030996	Art1	452.339	196.074	708.605	3.61397	1.85359	5.24134e-36	3.93528e-34
ENSMUSG00000086481	Gm11707	2.48647	1.07925	3.89369	3.60776	1.8511	0.197544	0.4002
ENSMUSG00000006958	Chrd	152.064	66.0327	238.095	3.60571	1.85028	7.0587e-19	2.1286e-17
ENSMUSG00000054988	Agtr1b	3.07856	1.33694	4.82018	3.60537	1.85015	0.591464	0.807719
ENSMUSG00000043795	Gm14492	969.766	422.119	1517.41	3.59475	1.84589	4.35549e-49	5.65548e-47
ENSMUSG00000000942	Hoxa4	16.2291	7.07149	25.3866	3.59	1.84398	0.000853844	0.00441
ENSMUSG00000004814	Ccl24	17.9245	7.81176	28.0373	3.58911	1.84363	0.000946446	0.00483944
ENSMUSG00000093865		3.68278	1.60567	5.7599	3.58723	1.84287	0.292591	0.52454
ENSMUSG00000054006	D630008O14Rik	0.946826	0.41304	1.48061	3.58467	1.84184	0.55688	0.780627
ENSMUSG00000054156	Gm4894	0.946826	0.41304	1.48061	3.58467	1.84184	0.55688	0.780627
ENSMUSG00000064796		0.946826	0.41304	1.48061	3.58467	1.84184	0.55688	0.780627
ENSMUSG00000058914	C1qtnf3	51.1675	22.3258	80.0092	3.58371	1.84145	1.13499e-09	1.58267e-08
ENSMUSG00000064491		1.45542	0.635112	2.27572	3.58318	1.84124	0.899102	0.988877
ENSMUSG00000075478	Slitrk1	1.45542	0.635112	2.27572	3.58318	1.84124	0.899102	0.988877
ENSMUSG00000084761	Gm12406	0.945972	0.41304	1.4789	3.58053	1.84017	0.434971	0.67588
ENSMUSG00000092903		0.945972	0.41304	1.4789	3.58053	1.84017	0.434971	0.67588
ENSMUSG00000026587	Astn1	265.38	115.877	414.883	3.58039	1.84011	3.43072e-28	1.80309e-26
ENSMUSG00000047898	Ccr4	1.89002	0.826081	2.95397	3.57588	1.8383	0.402689	0.645884
ENSMUSG00000086684	Gm12590	1.88917	0.826081	2.95226	3.57381	1.83746	0.319818	0.555573
ENSMUSG00000047485	Klhl34	44.1723	19.36	68.9846	3.56326	1.8332	6.00316e-08	6.74713e-07
ENSMUSG00000037362	Nov	2319.51	1017.73	3621.29	3.55821	1.83115	2.23453e-64	4.52522e-62
ENSMUSG00000095663		4.64605	2.03877	7.25332	3.55769	1.83094	0.0974607	0.239704
ENSMUSG00000055416	Fam136b-ps	3.26824	1.43476	5.10172	3.55579	1.83017	0.237131	0.45426
ENSMUSG00000038233	Fam198a	149.166	65.4972	232.835	3.55489	1.8298	7.4455e-18	2.10708e-16
ENSMUSG00000091947	6530401F13Rik	1.63284	0.717382	2.5483	3.55222	1.82872	0.319868	0.555573
ENSMUSG00000068165	Gm10233	2.75602	1.21269	4.29935	3.54529	1.82591	0.191122	0.39038
ENSMUSG00000084834	4930565N06Rik	59.5225	26.1984	92.8467	3.54399	1.82537	2.25515e-11	3.81165e-10
ENSMUSG00000091438	Gm17088	3.96107	1.74547	6.17667	3.53869	1.82321	0.152352	0.332973
ENSMUSG00000027581	Stmn3	6.62434	2.9207	10.328	3.53614	1.82217	0.061033	0.167087
ENSMUSG00000021314	Amph	58.1325	25.6532	90.6118	3.53219	1.82056	2.62353e-09	3.47819e-08
ENSMUSG00000085400	Gm11610	1.12233	0.495311	1.74935	3.53182	1.82041	0.422998	0.664527
ENSMUSG00000078816	Prkcg	1280.41	565.343	1995.47	3.52967	1.81953	3.06978e-54	4.73863e-52
ENSMUSG00000023886	Smoc2	3713.22	1639.71	5786.73	3.52913	1.81931	1.78152e-64	3.64124e-62
ENSMUSG00000065634		1.12148	0.495311	1.74764	3.52837	1.819	0.330923	0.56829
ENSMUSG00000038246	Fam50b	3.52872	1.55901	5.49842	3.52686	1.81838	0.294125	0.526419
ENSMUSG00000017754	Pltp	862.472	381.225	1343.72	3.52474	1.81752	3.73462e-44	4.00185e-42
ENSMUSG00000032537	Ephb1	564.937	250.033	879.842	3.5189	1.81513	5.7789e-40	5.49843e-38
ENSMUSG00000074517	Gm10710	7.58779	3.36484	11.8107	3.51004	1.81149	0.0179721	0.0616276
ENSMUSG00000059668	Krt4	2.15284	0.955005	3.35067	3.50853	1.81087	0.397214	0.640755
ENSMUSG00000008193	Spib	60.2995	26.8152	93.7837	3.4974	1.80628	2.02108e-08	2.42596e-07
ENSMUSG00000024042	Sik1	8638.05	3851.71	13424.4	3.48531	1.80129	8.19423e-70	2.00977e-67
ENSMUSG00000085471	4933423P22Rik	1.29506	0.577582	2.01253	3.48441	1.80092	0.544752	0.771718
ENSMUSG00000032313	AI118078	91.3201	40.7377	141.902	3.48332	1.80046	4.27902e-12	7.68553e-11
ENSMUSG00000055691	Gja6	5.4344	2.42539	8.44342	3.48127	1.79961	0.116925	0.274329
ENSMUSG00000000724	Cryba1	2.41694	1.07925	3.75462	3.4789	1.79863	0.389549	0.63269
ENSMUSG00000018819	Lsp1	5495.58	2461.47	8529.68	3.46528	1.79297	3.10767e-65	6.47158e-63
ENSMUSG00000082051	Gm16072	4.40153	1.97205	6.831	3.4639	1.7924	0.345165	0.584921
ENSMUSG00000087018	2900072N19Rik	6.05677	2.71418	9.39937	3.46306	1.79205	0.0497524	0.142443
ENSMUSG00000063672	Nkx6-3	6.21957	2.78726	9.65188	3.46286	1.79196	0.0630017	0.171392
ENSMUSG00000091185	Gm3278	2.85251	1.27941	4.42561	3.4591	1.7904	0.188959	0.387035
ENSMUSG00000092222	Gm20506	0.953748	0.428592	1.4789	3.45061	1.78685	0.434408	0.675307
ENSMUSG00000092294	Gm18200	10.9053	4.90194	16.9086	3.44937	1.78633	0.0121129	0.0440349
ENSMUSG00000024365	Cyp21a1	1.55831	0.701831	2.41479	3.44069	1.7827	0.41152	0.6538
ENSMUSG00000031659	Adcy7	1571.84	708.581	2435.1	3.43658	1.78097	2.4971e-55	4.05301e-53
ENSMUSG00000082771	Gm12803	13.43	6.05428	20.8057	3.43653	1.78095	0.00713759	0.0281098
ENSMUSG00000017943	Gdap1l1	3.37569	1.5234	5.22798	3.43179	1.77896	0.295668	0.52804
ENSMUSG00000041248	Kcnj1	1.73744	0.784102	2.69078	3.43167	1.77891	0.247615	0.467887
ENSMUSG00000071005	Ccl19	1.73381	0.784102	2.68352	3.42241	1.77501	0.315565	0.551222
ENSMUSG00000085499	Gm15713	5.97987	2.70499	9.25475	3.42136	1.77457	0.175029	0.367226
ENSMUSG00000081597	Gm14506	4.9518	2.24078	7.66283	3.41971	1.77388	0.0652901	0.176274
ENSMUSG00000045440	Insm2	1.73189	0.784102	2.67968	3.41751	1.77295	0.690503	0.876674
ENSMUSG00000056729	Gm10006	1.47097	0.666214	2.27572	3.4159	1.77226	0.899998	0.989038
ENSMUSG00000089902	Gm13625	3.12525	1.41921	4.83128	3.40419	1.76731	0.239444	0.457301
ENSMUSG00000045404	Kcnk13	46.6287	21.1768	72.0806	3.40375	1.76712	1.43736e-07	1.52539e-06
ENSMUSG00000031551	Ido1	5.38778	2.4473	8.32827	3.40304	1.76683	0.065229	0.176173
ENSMUSG00000086444	Gm15961	24.8667	11.3136	38.4199	3.39591	1.7638	6.63911e-05	0.000445175
ENSMUSG00000081745	Gm15549	5.3786	2.4473	8.30991	3.39554	1.76364	0.178958	0.372542
ENSMUSG00000095134		327.667	149.191	506.143	3.39257	1.76238	1.94126e-24	8.19607e-23
ENSMUSG00000015852	Fcrls	537.258	245.047	829.47	3.38495	1.75913	4.69915e-36	3.55236e-34
ENSMUSG00000092748		2.34615	1.07289	3.6194	3.3735	1.75425	0.307026	0.54076
ENSMUSG00000084973	Gm13848	3.65579	1.67239	5.63919	3.37194	1.75358	0.188656	0.386594
ENSMUSG00000078302	Foxd1	9.8377	4.50163	15.1738	3.37073	1.75306	0.0233191	0.0765877
ENSMUSG00000085277	Gm13943	19.7659	9.04806	30.4836	3.36908	1.75236	0.000158499	0.000979757
ENSMUSG00000047384	A730013G03Rik	2.08608	0.955005	3.21715	3.36873	1.7522	0.508669	0.741293
ENSMUSG00000001493	Meox1	3174.79	1453.75	4895.84	3.36773	1.75178	1.0499e-59	1.93128e-57
ENSMUSG00000028214	Gem	823.603	377.203	1270	3.3669	1.75142	3.78102e-45	4.17312e-43
ENSMUSG00000030911	Zp2	19.3385	8.85709	29.8199	3.36679	1.75137	0.000187361	0.00114041
ENSMUSG00000036067	Slc2a6	18.727	8.57933	28.8746	3.3656	1.75087	0.000468725	0.00258666
ENSMUSG00000053388	Trim50	2.87402	1.31688	4.43116	3.3649	1.75056	0.158432	0.342481
ENSMUSG00000027022	Xirp2	9265.15	4246.68	14283.6	3.36348	1.74995	2.58176e-70	6.70469e-68
ENSMUSG00000077928	Mir208b	1754.05	804.673	2703.43	3.35966	1.74832	1.4196e-50	1.95851e-48
ENSMUSG00000031070	Mrgprf	293.6	134.874	452.325	3.35368	1.74574	5.0702e-27	2.48159e-25
ENSMUSG00000063704	Mapk15	31.3733	14.4316	48.3149	3.34785	1.74324	3.78051e-05	0.000266702
ENSMUSG00000015314	Slamf6	16.7451	7.70644	25.7837	3.34574	1.74233	0.000830284	0.00430328
ENSMUSG00000026527	Rgs7	36.068	16.604	55.5319	3.3445	1.74179	1.63379e-05	0.000123296
ENSMUSG00000054752	Fsd1l	5344.49	2460.85	8228.13	3.34362	1.74141	5.01069e-66	1.10606e-63
ENSMUSG00000055210	Foxd2	25.1186	11.5776	38.6596	3.33917	1.73949	0.000172473	0.00105902
ENSMUSG00000034912	Mdga2	53.2174	24.5825	81.8523	3.3297	1.73539	7.28413e-07	6.89789e-06
ENSMUSG00000035849	Krt222	1274.46	588.758	1960.15	3.3293	1.73522	2.60797e-50	3.52492e-48
ENSMUSG00000038894	Irs2	2505.11	1158.75	3851.48	3.32382	1.73284	4.1253e-60	7.71711e-58
ENSMUSG00000007097	Atp1a2	22975	10641.3	35308.7	3.31808	1.73035	2.14085e-65	4.58807e-63
ENSMUSG00000040724	Kcna2	9.44767	4.38657	14.5088	3.30755	1.72576	0.00692258	0.0273851
ENSMUSG00000074681	Defb23	2.80119	1.30133	4.30106	3.30514	1.72471	0.304314	0.538601
ENSMUSG00000036960	Clca5	24.8393	11.542	38.1367	3.30416	1.72428	0.000175326	0.00107534
ENSMUSG00000028003	Lrat	10.6772	4.97051	16.384	3.29623	1.72082	0.0128311	0.0462952
ENSMUSG00000028339	Col15a1	26781.9	12470.3	41093.6	3.29531	1.72041	6.05807e-67	1.36455e-64
ENSMUSG00000023019	Gpd1	2970.58	1383.62	4557.55	3.29394	1.71981	4.5283e-57	7.68905e-55
ENSMUSG00000074217	2210011C24Rik	16.798	7.84004	25.756	3.28519	1.71598	0.00412016	0.0174934
ENSMUSG00000091712	Sec14l5	22.687	10.6026	34.7715	3.27954	1.71349	0.000420625	0.00234408
ENSMUSG00000039914	Coq10a	6263	2927.92	9598.07	3.27811	1.71287	2.093e-60	3.98284e-58
ENSMUSG00000030621	Me3	3382.8	1582.12	5183.48	3.27628	1.71206	2.0662e-57	3.59128e-55
ENSMUSG00000038403	Hfe2	7113.02	3327.76	10898.3	3.27496	1.71148	1.42666e-58	2.49938e-56
ENSMUSG00000087236	Gm1305	52.0465	24.3569	79.7361	3.27366	1.7109	8.47525e-08	9.34012e-07
ENSMUSG00000064225	Paqr9	2654.94	1243.31	4066.56	3.27076	1.70963	1.7532e-56	2.93182e-54
ENSMUSG00000039304	Tnfsf10	981.723	459.894	1503.55	3.26935	1.709	5.73411e-48	7.11095e-46
ENSMUSG00000020340	Cyfip2	8740.45	4094.75	13386.2	3.2691	1.70889	1.28932e-64	2.65986e-62
ENSMUSG00000058567	Gm10043	4.48157	2.10098	6.86217	3.26618	1.7076	0.0655042	0.176744
ENSMUSG00000053583	Gm9912	1.05557	0.495311	1.61583	3.26226	1.70587	0.552843	0.777438
ENSMUSG00000090001	Gm9719	1.05557	0.495311	1.61583	3.26226	1.70587	0.552843	0.777438
ENSMUSG00000036256	Igfbp7	11252.8	5280.41	17225.1	3.26208	1.70579	9.0459e-59	1.59743e-56
ENSMUSG00000022508	Bcl6	340.583	159.839	521.328	3.26158	1.70557	3.73017e-27	1.8545e-25
ENSMUSG00000068037	Mas1	120.03	56.3428	183.718	3.26071	1.70519	2.40313e-13	4.84888e-12
ENSMUSG00000000197	Nalcn	8.76162	4.11333	13.4099	3.26012	1.70492	0.0499686	0.142895
ENSMUSG00000064595		1.31968	0.619561	2.01979	3.26004	1.70489	0.533255	0.762738
ENSMUSG00000019577	Pdk4	65082.2	30667.5	99496.9	3.24438	1.69794	9.39698e-74	2.59286e-71
ENSMUSG00000077431		3.51557	1.65684	5.3743	3.24371	1.69765	0.124136	0.286379
ENSMUSG00000022330	Osr2	4.30149	2.0279	6.57507	3.24231	1.69702	0.184518	0.380517
ENSMUSG00000085965	2310016D23Rik	3.16179	1.4923	4.83128	3.23748	1.69487	0.297846	0.53049
ENSMUSG00000022586	Ly6i	8.6003	4.06667	13.1339	3.22965	1.69138	0.0740632	0.194575
ENSMUSG00000031825	Crispld2	1170.38	554.566	1786.2	3.22089	1.68746	2.43164e-47	2.91717e-45
ENSMUSG00000040592	Cd79b	102.097	48.4081	155.786	3.21818	1.68625	1.83957e-11	3.13565e-10
ENSMUSG00000095306		45.5224	21.6118	69.4329	3.21273	1.6838	8.91455e-07	8.31347e-06
ENSMUSG00000029228	Lnx1	274.524	130.43	418.618	3.20951	1.68235	4.05858e-25	1.81354e-23
ENSMUSG00000030214	Plbd1	1460.51	694.059	2226.96	3.2086	1.68194	2.76749e-49	3.63629e-47
ENSMUSG00000089815	Gm5083	3.34592	1.59012	5.10172	3.20839	1.68185	0.29597	0.528323
ENSMUSG00000069893	9930111J21Rik1	96.0091	45.647	146.371	3.20659	1.68104	7.39518e-13	1.4232e-11
ENSMUSG00000028600	Podn	311.455	148.08	474.829	3.20656	1.68103	8.35558e-25	3.6236e-23
ENSMUSG00000078957	1700060C20Rik	1.93808	0.923903	2.95226	3.19542	1.67601	0.318352	0.553944
ENSMUSG00000055958	Gm9987	5.81317	2.77171	8.85464	3.19465	1.67566	0.118311	0.276711
ENSMUSG00000032452	Clstn2	283.844	135.339	432.348	3.19455	1.67561	4.01135e-25	1.79608e-23
ENSMUSG00000064580		7.13786	3.40513	10.8706	3.19241	1.67465	0.0918482	0.228867
ENSMUSG00000050097	Ces2b	4.22843	2.01871	6.43815	3.18924	1.67321	0.187113	0.384281
ENSMUSG00000091617	Gm3752	33.7811	16.1304	51.4318	3.1885	1.67288	9.30349e-06	7.35549e-05
ENSMUSG00000086475	Gm12139	1.76258	0.841632	2.68352	3.18847	1.67287	0.405454	0.648804
ENSMUSG00000089267		5.19166	2.48292	7.9004	3.1819	1.66989	0.325198	0.561647
ENSMUSG00000022494	Shisa9	10.3079	4.93022	15.6856	3.18153	1.66972	0.0703919	0.186893
ENSMUSG00000076469	Trbv13-2	1.49933	0.717382	2.28127	3.17999	1.66902	0.530358	0.760671
ENSMUSG00000036446	Lum	8863.07	4243.06	13483.1	3.17768	1.66797	2.50881e-60	4.7333e-58
ENSMUSG00000006219	Fblim1	16815.4	8055.13	25575.6	3.17507	1.66679	1.52577e-61	2.95437e-59
ENSMUSG00000034990	Otoa	254.778	122.197	387.36	3.16996	1.66447	3.0634e-22	1.12891e-20
ENSMUSG00000039257	Vstm2b	11.2203	5.38355	17.0571	3.16837	1.66374	0.00516812	0.0212639
ENSMUSG00000047361	Gm973	2.55905	1.22824	3.88985	3.167	1.66311	0.387663	0.63037
ENSMUSG00000030116	Mfap5	4020.63	1930.85	6110.41	3.16462	1.66203	1.87032e-54	2.92805e-52
ENSMUSG00000026390	Marco	9.09552	4.36819	13.8228	3.16443	1.66195	0.073172	0.192893
ENSMUSG00000086838	Gm16212	1.06335	0.510862	1.61583	3.16295	1.66127	0.552563	0.777144
ENSMUSG00000086076	Ncr3-ps	5.39467	2.59629	8.19304	3.15567	1.65795	0.0651869	0.176128
ENSMUSG00000073821	8030451A03Rik	38.2004	18.416	57.9847	3.1486	1.65471	1.59899e-05	0.000120795
ENSMUSG00000051067	Lingo3	285.425	137.663	433.187	3.14672	1.65385	9.61053e-25	4.15152e-23
ENSMUSG00000065817		4.68584	2.26085	7.11084	3.14521	1.65316	0.150215	0.329378
ENSMUSG00000001333	Sync	638.421	308.206	968.635	3.14282	1.65206	7.32115e-36	5.44132e-34
ENSMUSG00000086139	Gm11211	3.72069	1.79664	5.64474	3.14184	1.65161	0.155225	0.337049
ENSMUSG00000080396	Snord111	1.94393	0.939454	2.94841	3.13843	1.65005	0.650668	0.849671
ENSMUSG00000078490	C030017K20Rik	7.34723	3.5513	11.1432	3.13777	1.64974	0.0631385	0.17164
ENSMUSG00000083695	1700045I19Rik	2.66012	1.28577	4.03446	3.13777	1.64974	0.162723	0.348931
ENSMUSG00000003032	Klf4	4551.22	2199.89	6902.54	3.13767	1.64969	2.1526e-56	3.57267e-54
ENSMUSG00000092471	Cyp21a2-ps	2.39687	1.16153	3.63221	3.1271	1.64483	0.199807	0.403416
ENSMUSG00000024388	Myo7b	32.3298	15.6754	48.9842	3.12491	1.64381	4.92498e-05	0.000339944
ENSMUSG00000070601	Vmn2r84	1.76758	0.857183	2.67797	3.12415	1.64346	0.648165	0.848109
ENSMUSG00000049109	Themis	4.60587	2.23442	6.97733	3.12266	1.64278	0.148868	0.327054
ENSMUSG00000040775	Gm9772	2.1285	1.0326	3.22441	3.12261	1.64275	0.491021	0.727094
ENSMUSG00000095385		38.2977	18.5996	57.9958	3.11812	1.64067	1.44062e-05	0.000109883
ENSMUSG00000020020	Usp44	2.12488	1.0326	3.21715	3.11558	1.6395	0.614628	0.825581
ENSMUSG00000078648	Gm17546	23.949	11.6552	36.2427	3.10957	1.63671	0.00123358	0.00614121
ENSMUSG00000082395	Gm15480	7.99517	3.89294	12.0974	3.10752	1.63577	0.0363798	0.110052
ENSMUSG00000085575	Gm15485	2.65724	1.29496	4.01952	3.10396	1.63411	0.620955	0.830222
ENSMUSG00000025754	Agbl1	7.10456	3.46266	10.7465	3.10353	1.63391	0.0514326	0.145858
ENSMUSG00000024190	Dusp1	6310.11	3076.53	9543.69	3.10209	1.63324	1.14448e-54	1.81751e-52
ENSMUSG00000045655	AU021034	5.58146	2.72505	8.43787	3.0964	1.63059	0.260645	0.48487
ENSMUSG00000072941	Sod3	634.026	309.588	958.464	3.09594	1.63038	1.628e-34	1.14084e-32
ENSMUSG00000001281	Itgb7	62.2197	30.3823	94.0572	3.09579	1.63031	7.07428e-07	6.71069e-06
ENSMUSG00000073975	Olfr550	1.3316	0.650663	2.01253	3.09305	1.62903	0.685017	0.873248
ENSMUSG00000044770	Scml4	543.977	265.866	822.088	3.09212	1.6286	3.30708e-31	1.96238e-29
ENSMUSG00000059412	Fxyd2	18.1032	8.85257	27.3539	3.08994	1.62758	0.00508244	0.0209779
ENSMUSG00000047205	Dusp18	6305.71	3085.22	9526.2	3.08769	1.62653	3.1654e-57	5.45883e-55
ENSMUSG00000091315	Gm17214	1.68804	0.826081	2.55001	3.08687	1.62615	0.51152	0.743123
ENSMUSG00000047854	Stx19	3.91037	1.91452	5.90622	3.08496	1.62525	0.152948	0.333878
ENSMUSG00000090889	Gm17428	1006.86	493.475	1520.24	3.08069	1.62325	8.77495e-36	6.45661e-34
ENSMUSG00000064600		2.05131	1.00617	3.09644	3.07745	1.62173	0.315049	0.550538
ENSMUSG00000055523	Gucy2g	10.5739	5.18791	15.9599	3.07637	1.62123	0.0487888	0.139993
ENSMUSG00000086964	Gm15948	4.36734	2.14296	6.59173	3.07599	1.62105	0.0847087	0.215248
ENSMUSG00000066009	Gm13051	1.59667	0.784102	2.40923	3.0726	1.61946	0.688978	0.875979
ENSMUSG00000045087	S1pr5	11.655	5.7252	17.5847	3.07146	1.61893	0.039558	0.118048
ENSMUSG00000021898	Asb14	1629.31	801.053	2457.56	3.06791	1.61726	1.79031e-47	2.17139e-45
ENSMUSG00000043518	Rai2	863.91	424.754	1303.07	3.06781	1.61721	1.5325e-39	1.43951e-37
ENSMUSG00000035513	Ntng2	81.1614	39.9191	122.404	3.0663	1.6165	1.97636e-10	3.02959e-09
ENSMUSG00000006205	Htra1	6783.95	3336.78	10231.1	3.06617	1.61644	4.09203e-54	6.27275e-52
ENSMUSG00000024517	Grp	3.92007	1.93008	5.91007	3.06209	1.61452	0.0817941	0.20992
ENSMUSG00000082740	Gm14127	1.87581	0.923903	2.82771	3.06061	1.61382	0.402994	0.64598
ENSMUSG00000062591	Tubb4a	812.664	400.58	1224.75	3.05744	1.61232	1.4196e-36	1.11517e-34
ENSMUSG00000035498	Cdcp1	15.6817	7.73303	23.6304	3.05578	1.61154	0.00263126	0.0118391
ENSMUSG00000032191	Bcl2l10	2.21996	1.09481	3.34511	3.05544	1.61138	0.774091	0.927396
ENSMUSG00000081849	Gm15847	4.44858	2.19413	6.70304	3.05499	1.61117	0.335454	0.573717
ENSMUSG00000034435	Tmem30b	11.0451	5.45027	16.6399	3.05304	1.61025	0.0278824	0.088753
ENSMUSG00000017692	Rhbdl3	208.349	102.838	313.86	3.05199	1.60975	5.40724e-18	1.54211e-16
ENSMUSG00000082043	Gm12848	3.83444	1.89446	5.77442	3.04806	1.60789	0.233896	0.450486
ENSMUSG00000081161	Gm12783	2.58826	1.27941	3.8971	3.04601	1.60692	0.307079	0.540806
ENSMUSG00000091993	B930036N10Rik	4.63186	2.29195	6.97177	3.04186	1.60495	0.274882	0.502588
ENSMUSG00000096054		113.325	56.1024	170.547	3.03993	1.60404	9.30482e-15	2.13508e-13
ENSMUSG00000086196	Gm13571	1.25121	0.619561	1.88286	3.03903	1.60361	0.422889	0.664511
ENSMUSG00000094900		1.25121	0.619561	1.88286	3.03903	1.60361	0.422889	0.664511
ENSMUSG00000074235	Gm10649	10.9784	5.44108	16.5158	3.03538	1.60188	0.0164544	0.0571649
ENSMUSG00000080916	Gm12463	4.72228	2.34312	7.10145	3.03077	1.59968	0.40846	0.651188
ENSMUSG00000084390	Gm15425	1.34215	0.666214	2.01808	3.02918	1.59893	0.419374	0.661374
ENSMUSG00000082062	Ftl2	0.894766	0.444143	1.34539	3.02918	1.59893	0.558895	0.782152
ENSMUSG00000055994	Nod2	214.63	106.538	322.721	3.02915	1.59892	3.97006e-18	1.14386e-16
ENSMUSG00000053977	Cd8a	17.2086	8.54654	25.8707	3.02704	1.59791	0.0286234	0.0905205
ENSMUSG00000085048	Gm15537	0.893913	0.444143	1.34368	3.02534	1.5971	0.438826	0.679339
ENSMUSG00000072674	Gm10393	40.9179	20.3429	61.4928	3.02281	1.59589	1.11756e-05	8.70039e-05
ENSMUSG00000026770	Il2ra	11.875	5.90545	17.8445	3.0217	1.59536	0.0275063	0.0877546
ENSMUSG00000086947	4930522O17Rik	1.15984	0.577582	1.74209	3.01618	1.59272	0.549188	0.775185
ENSMUSG00000030074	Gxylt2	329.943	164.777	495.108	3.00471	1.58722	1.58836e-25	7.30448e-24
ENSMUSG00000037577	Ephx3	58.1453	29.0468	87.2437	3.00355	1.58667	2.56188e-07	2.61205e-06
ENSMUSG00000046856	Gpr1	8.954	4.47971	13.4283	2.99758	1.5838	0.0290418	0.091529
ENSMUSG00000085514	9530048J24Rik	2.86706	1.43476	4.29935	2.99656	1.58331	0.243802	0.46309
ENSMUSG00000025348	Itga7	8533.15	4270.97	12795.3	2.99589	1.58298	1.64724e-54	2.59723e-52
ENSMUSG00000054598	9130230L23Rik	3.30996	1.65684	4.96308	2.99552	1.58281	0.193545	0.393942
ENSMUSG00000062077	Trim54	905.906	453.69	1358.12	2.9935	1.58183	2.54403e-38	2.19363e-36
ENSMUSG00000046719	Nxph3	16.487	8.26863	24.7054	2.98785	1.57911	0.00151059	0.00733659
ENSMUSG00000040310	Alx4	17.9057	8.98601	26.8254	2.98524	1.57785	0.00722198	0.0283712
ENSMUSG00000087160	Gm16336	3.04437	1.52791	4.56083	2.98501	1.57774	0.299046	0.531949
ENSMUSG00000086949	Gm13066	4.83976	2.43175	7.24777	2.98048	1.57554	0.221232	0.434241
ENSMUSG00000050395	Tnfsf15	1.97144	0.990622	2.95226	2.98021	1.57541	0.317366	0.553023
ENSMUSG00000078160	Gm16503	45.3081	22.7752	67.841	2.97873	1.5747	1.68542e-06	1.51359e-05
ENSMUSG00000080977	Gm13772	5.10205	2.56519	7.63892	2.97792	1.5743	0.325231	0.561653
ENSMUSG00000090317	Gm17324	4.0319	2.0279	6.03589	2.97643	1.57358	0.231957	0.448029
ENSMUSG00000081448	Gm13086	895.746	450.535	1340.96	2.97636	1.57355	2.58511e-34	1.79446e-32
ENSMUSG00000033453	Adamts15	1883.92	948.822	2819.02	2.97107	1.57098	8.24259e-43	8.54211e-41
ENSMUSG00000018168	Ikzf3	37.4912	18.8913	56.0912	2.96916	1.57006	5.24802e-05	0.000359842
ENSMUSG00000021622	Ckmt2	39436.5	19878.3	58994.8	2.96779	1.56939	8.22067e-54	1.2429e-51
ENSMUSG00000034634	Ly6d	26.5568	13.3863	39.7273	2.96776	1.56938	0.000260414	0.00153249
ENSMUSG00000018500	Adora2b	57.3762	28.9659	85.7866	2.96164	1.5664	1.50952e-07	1.5989e-06
ENSMUSG00000089129		9.52442	4.80879	14.24	2.96125	1.56621	0.0107247	0.0397542
ENSMUSG00000007030	D17H6S56E-3	360.929	182.324	539.535	2.95921	1.56521	2.46865e-23	9.69627e-22
ENSMUSG00000095752		2.69252	1.36168	4.02336	2.9547	1.56301	0.305102	0.539392
ENSMUSG00000087571	Gm15202	3.05023	1.54346	4.55699	2.95244	1.56191	0.560146	0.783092
ENSMUSG00000027386	Fbln7	51.5837	26.1131	77.0543	2.95079	1.5611	1.81523e-06	1.61962e-05
ENSMUSG00000040525	Cblc	13.4754	6.82283	20.1279	2.95008	1.56076	0.0110174	0.0406755
ENSMUSG00000094132	Gm3264	7.45967	3.77788	11.1415	2.94913	1.56029	0.063711	0.172911
ENSMUSG00000074199	Krtdap	2.42468	1.22824	3.62111	2.9482	1.55983	0.490296	0.726749
ENSMUSG00000050075	Gpr171	8.27021	4.19092	12.3495	2.94672	1.55911	0.0903967	0.225987
ENSMUSG00000062417	Hist1h3g	9.24258	4.68623	13.7989	2.94457	1.55806	0.248949	0.469323
ENSMUSG00000042345	Ubash3a	3.42	1.73443	5.10556	2.94365	1.55761	0.194458	0.395436
ENSMUSG00000042190	Cmklr1	1003.33	508.84	1497.82	2.94359	1.55758	1.56847e-38	1.36847e-36
ENSMUSG00000078550	Dear1	15.4756	7.85092	23.1002	2.94236	1.55697	0.00317694	0.0139613
ENSMUSG00000034796	Cpne7	61.862	31.3958	92.3283	2.94079	1.5562	5.3945e-07	5.20447e-06
ENSMUSG00000055805	Fmnl1	1278.73	649.074	1908.39	2.94017	1.5559	2.01337e-39	1.88318e-37
ENSMUSG00000000183	Fgf6	9.17766	4.67068	13.6846	2.9299	1.55085	0.0202023	0.068125
ENSMUSG00000066975	Cryba4	77.084	39.2437	114.924	2.92848	1.55015	4.54602e-09	5.84783e-08
ENSMUSG00000090795	Gm7346	6.02976	3.07138	8.98815	2.92643	1.54914	0.142278	0.316885
ENSMUSG00000084493		6.65765	3.39127	9.92403	2.92635	1.5491	0.138838	0.311232
ENSMUSG00000086430	4930551O13Rik	27.928	14.2279	41.6281	2.9258	1.54883	0.00019058	0.00115732
ENSMUSG00000068243	Gm7079	1.62129	0.826081	2.41649	2.92525	1.54856	0.64566	0.847342
ENSMUSG00000088412		6.58346	3.35848	9.80845	2.9205	1.54622	0.115253	0.271516
ENSMUSG00000078796	Zfp541	1.53546	0.784102	2.28682	2.91648	1.54423	0.324234	0.560554
ENSMUSG00000053175	Bcl3	301.118	153.968	448.268	2.91143	1.54173	1.22885e-21	4.38217e-20
ENSMUSG00000061535	C1qtnf7	712.563	364.462	1060.66	2.91021	1.54112	5.16522e-32	3.17596e-30
ENSMUSG00000024471	Myot	213.582	109.296	317.869	2.90833	1.54019	1.71115e-17	4.74522e-16
ENSMUSG00000089656	Gm16271	14.9594	7.6581	22.2607	2.90682	1.53944	0.030263	0.094742
ENSMUSG00000079491	H2-T10	48.8755	25.025	72.7259	2.90613	1.5391	7.06935e-06	5.67656e-05
ENSMUSG00000050556	Kcnb1	1977.12	1012.98	2941.25	2.90356	1.53782	2.59256e-46	2.98064e-44
ENSMUSG00000002274	Metrn	1017.26	521.206	1513.32	2.9035	1.53779	8.67505e-37	6.86355e-35
ENSMUSG00000092619	Gm20438	6.32446	3.24059	9.40833	2.90328	1.53768	0.0785433	0.203541
ENSMUSG00000031147	Magix	567.769	291.23	844.308	2.89911	1.53561	6.93112e-30	3.86357e-28
ENSMUSG00000092695	Mir3092	0.995737	0.510862	1.48061	2.89826	1.53519	0.555036	0.77938
ENSMUSG00000086361	Gm6569	2.89542	1.48593	4.30491	2.89711	1.53461	0.158017	0.341857
ENSMUSG00000030109	Slc6a12	4.68492	2.40532	6.96452	2.89546	1.53379	0.335231	0.573501
ENSMUSG00000089988	Gm16238	8.50239	4.36819	12.6366	2.89287	1.5325	0.0435698	0.127554
ENSMUSG00000093405	Gm20684	14.8212	7.61498	22.0274	2.89264	1.53239	0.00399515	0.0170348
ENSMUSG00000021448	Shc3	55.5398	28.5358	82.5438	2.89264	1.53239	1.86419e-06	1.66062e-05
ENSMUSG00000085151	1110018N20Rik	391.396	201.123	581.669	2.8921	1.53212	3.24867e-23	1.26923e-21
ENSMUSG00000036915	Kirrel2	5.69527	2.92706	8.46349	2.89146	1.5318	0.0988549	0.24203
ENSMUSG00000037922	Bank1	62.4364	32.0945	92.7784	2.89079	1.53146	1.51911e-07	1.60571e-06
ENSMUSG00000038067	Csf3	2.43981	1.25467	3.62495	2.88916	1.53065	0.309521	0.543805
ENSMUSG00000059336	Slc14a1	28.7961	14.809	42.7832	2.88899	1.53057	0.00255733	0.0115512
ENSMUSG00000051439	Cd14	107.594	55.3514	159.837	2.88767	1.52991	1.04573e-09	1.47121e-08
ENSMUSG00000020713	Gh	1.26399	0.650663	1.87731	2.88523	1.52869	0.683732	0.87257
ENSMUSG00000090592	Gm17571	1.26399	0.650663	1.87731	2.88523	1.52869	0.683732	0.87257
ENSMUSG00000068263	Ccdc48	173.283	89.312	257.253	2.88039	1.52626	9.46521e-16	2.33708e-14
ENSMUSG00000070469	Adamtsl3	1300.89	672.256	1929.53	2.87023	1.52117	1.28018e-40	1.25038e-38
ENSMUSG00000073407	Gm6034	5.15289	2.66301	7.64276	2.86997	1.52104	0.180291	0.37424
ENSMUSG00000043557	Mdga1	1192.68	616.494	1768.86	2.86922	1.52066	5.61401e-39	5.05811e-37
ENSMUSG00000043068	Fam89a	163.927	84.7696	243.084	2.86758	1.51984	5.81242e-15	1.35627e-13
ENSMUSG00000094891	Olfr55	1.35718	0.701831	2.01253	2.86755	1.51982	0.685469	0.873516
ENSMUSG00000049985	Ankrd55	6.52233	3.38039	9.66426	2.85892	1.51547	0.140378	0.313641
ENSMUSG00000061762	Tac1	6.15192	3.18942	9.11441	2.8577	1.51485	0.117333	0.275124
ENSMUSG00000055567	Unc80	21.2862	11.0433	31.5291	2.85504	1.51351	0.00103015	0.00521431
ENSMUSG00000012428	Steap4	3516.9	1825.14	5208.65	2.85384	1.5129	3.70483e-47	4.3968e-45
ENSMUSG00000066090	Insl5	1.54046	0.799653	2.28127	2.85282	1.51239	0.529696	0.760232
ENSMUSG00000087022	9130024F11Rik	1.80871	0.939454	2.67797	2.85056	1.51125	0.648795	0.848251
ENSMUSG00000038402	Foxf2	3.88653	2.01871	5.75435	2.85051	1.51122	0.622867	0.831418
ENSMUSG00000086905	Gm13716	54.7458	28.4548	81.0367	2.8479	1.5099	1.66616e-05	0.000125697
ENSMUSG00000091938	Gm2442	4.53277	2.35867	6.70688	2.8435	1.50767	0.184898	0.380981
ENSMUSG00000084819	Gm11967	9.88578	5.14593	14.6256	2.84218	1.507	0.0416483	0.122989
ENSMUSG00000026825	Dnm1	1392.18	724.928	2059.44	2.84089	1.50634	2.18635e-39	2.0278e-37
ENSMUSG00000086269	Gm16154	10.1712	5.2966	15.0458	2.84065	1.50622	0.0413849	0.122392
ENSMUSG00000030731	Syt3	82.1826	42.8751	121.49	2.83358	1.50263	1.39292e-08	1.70251e-07
ENSMUSG00000047821	Trim16	922.775	481.47	1364.08	2.83316	1.50241	6.98077e-35	4.98685e-33
ENSMUSG00000052848	C130026L21Rik	23.613	12.3261	34.8999	2.83138	1.5015	0.00077718	0.00406066
ENSMUSG00000022613	Miox	4.16929	2.17857	6.16001	2.82754	1.49955	0.710428	0.889355
ENSMUSG00000019929	Dcn	28025	14649	41401.1	2.82621	1.49887	5.68785e-50	7.56346e-48
ENSMUSG00000064745		0.81938	0.428592	1.21017	2.82359	1.49753	0.561902	0.784183
ENSMUSG00000044921	Rassf9	593.397	310.422	876.371	2.82316	1.49731	1.32641e-30	7.64468e-29
ENSMUSG00000095068		1.1836	0.619561	1.74764	2.82078	1.49609	0.425582	0.66683
ENSMUSG00000042745	Id1	2962.32	1550.68	4373.96	2.82067	1.49604	1.65074e-45	1.86863e-43
ENSMUSG00000063767	S100a7a	7.27324	3.80898	10.7375	2.81899	1.49518	0.077601	0.201668
ENSMUSG00000021239	Vsx2	1.27176	0.666214	1.87731	2.81788	1.49461	0.683887	0.872582
ENSMUSG00000082640	Gm11402	1.27176	0.666214	1.87731	2.81788	1.49461	0.683887	0.872582
ENSMUSG00000039838	Slc45a1	1.18168	0.619561	1.7438	2.81457	1.49292	0.880868	0.980154
ENSMUSG00000084320	Gm14125	1.36773	0.717382	2.01808	2.81312	1.49217	0.418407	0.660417
ENSMUSG00000038239	Hrc	21311.2	11183.6	31438.8	2.81115	1.49116	2.90237e-49	3.79095e-47
ENSMUSG00000078491	Gm13090	10.4679	5.49507	15.4408	2.80994	1.49054	0.0234918	0.0770456
ENSMUSG00000005628	Tmod4	227.259	119.384	335.134	2.80719	1.48913	7.08873e-17	1.88753e-15
ENSMUSG00000093686	Gm4705	1.36496	0.717382	2.01253	2.80538	1.4882	0.685603	0.873554
ENSMUSG00000083230	Gm14158	2.36484	1.2438	3.48589	2.80262	1.48678	0.490476	0.726776
ENSMUSG00000053861	Gm9925	4.18636	2.20332	6.16941	2.80006	1.48546	0.229997	0.445464
ENSMUSG00000085242	Gm11537	12.1127	6.377	17.8483	2.79886	1.48484	0.0157819	0.0551044
ENSMUSG00000079364	Gm3558	78.3838	41.2843	115.483	2.79727	1.48402	2.08927e-08	2.4983e-07
ENSMUSG00000067653	Ankrd23	10466.2	5513.81	15418.6	2.79636	1.48355	9.13019e-51	1.27557e-48
ENSMUSG00000022523	Fgf12	31.3958	16.5418	46.2499	2.79594	1.48334	0.000818992	0.00425075
ENSMUSG00000092225	Gm2381	1.09585	0.577582	1.61413	2.79463	1.48266	0.424696	0.665725
ENSMUSG00000031880	Rrad	11576.2	6105.36	17047	2.79213	1.48137	8.50006e-48	1.03663e-45
ENSMUSG00000078307	AI593442	25.1436	13.2656	37.0216	2.7908	1.48068	0.00443346	0.0186621
ENSMUSG00000096233	Gm13238	3.55985	1.87891	5.24079	2.78927	1.47989	0.1928	0.392865
ENSMUSG00000005540	Fcer2a	23.9956	12.6724	35.3188	2.78705	1.47874	0.00029299	0.00169994
ENSMUSG00000038530	Rgs4	1305.94	690.42	1921.47	2.78304	1.47666	1.38905e-37	1.14839e-35
ENSMUSG00000054763	Defb42	37.0402	19.5914	54.489	2.78127	1.47574	0.000402867	0.00225593
ENSMUSG00000026832	Cytip	99.6279	52.696	146.56	2.78123	1.47572	1.05768e-08	1.30682e-07
ENSMUSG00000026678	Rgs5	48654.6	25740.3	71569	2.78042	1.4753	1.1319e-51	1.60164e-49
ENSMUSG00000086741	Gm15816	775.615	410.342	1140.89	2.78033	1.47526	1.13238e-29	6.26469e-28
ENSMUSG00000020363	Gfpt2	1420.04	752.052	2088.04	2.77645	1.47324	2.33279e-39	2.15457e-37
ENSMUSG00000079654	Prrt4	458.276	243.012	673.54	2.77163	1.47073	1.14607e-24	4.9123e-23
ENSMUSG00000030149	Klrk1	7.11551	3.77337	10.4577	2.77144	1.47064	0.195733	0.397225
ENSMUSG00000027452	Acss1	9251.15	4906.29	13596	2.77114	1.47048	2.41871e-48	3.06843e-46
ENSMUSG00000081931	Gm15211	2.73406	1.45032	4.01781	2.7703	1.47004	0.587908	0.804705
ENSMUSG00000015396	Cd83	243.015	128.942	357.088	2.76937	1.46956	3.45461e-17	9.40285e-16
ENSMUSG00000036244	Tbc1d21	14.2598	7.57131	20.9482	2.76679	1.46821	0.0184664	0.0630905
ENSMUSG00000061972	Olfr99	6.11392	3.24695	8.98089	2.76595	1.46777	0.171057	0.361573
ENSMUSG00000027347	Rasgrp1	43.2067	22.9461	63.4673	2.76594	1.46777	4.51499e-05	0.000313705
ENSMUSG00000086707	Gm12088	1.64098	0.872734	2.40923	2.76056	1.46496	0.820338	0.95095
ENSMUSG00000056498	Tmem154	469.32	249.868	688.772	2.75654	1.46286	1.9419e-24	8.19607e-23
ENSMUSG00000091732	Gm17541	1.19223	0.635112	1.74935	2.75439	1.46173	0.535271	0.764317
ENSMUSG00000058152	Chsy3	86.4831	46.1142	126.852	2.75082	1.45986	5.51454e-09	7.01198e-08
ENSMUSG00000042109	Csdc2	473.665	252.762	694.568	2.74791	1.45834	5.26208e-23	2.02009e-21
ENSMUSG00000049744	Arhgap15	45.8468	24.4686	67.225	2.7474	1.45807	5.88646e-05	0.000399317
ENSMUSG00000083518	Gm9429	1.37273	0.732934	2.01253	2.74586	1.45726	0.685736	0.873554
ENSMUSG00000070084	Mir486	70.3199	37.5649	103.075	2.74391	1.45623	8.89274e-07	8.29664e-06
ENSMUSG00000038528	BC021785	39.4955	21.1009	57.8901	2.74348	1.45601	1.59057e-05	0.000120282
ENSMUSG00000034641	Cd300ld	115.286	61.6096	168.963	2.74248	1.45548	1.48087e-09	2.02407e-08
ENSMUSG00000026360	Rgs2	4959.88	2651.69	7268.07	2.74092	1.45466	9.51753e-46	1.08855e-43
ENSMUSG00000027902	BC051070	1.46508	0.784102	2.14605	2.73695	1.45257	0.530911	0.761139
ENSMUSG00000035355	Kcnh4	3.29841	1.76553	4.83128	2.73644	1.4523	0.357691	0.597933
ENSMUSG00000023088	Abcc1	3263.65	1747.51	4779.78	2.7352	1.45165	1.15889e-41	1.15753e-39
ENSMUSG00000046532	Ar	119.75	64.131	175.369	2.73454	1.4513	3.88654e-11	6.41182e-10
ENSMUSG00000024399	Ltb	34.3645	18.4067	50.3223	2.73392	1.45097	0.000309421	0.00178566
ENSMUSG00000086096	Gm12688	5.50374	2.9518	8.05569	2.72908	1.44841	0.177328	0.37029
ENSMUSG00000062785	Kcnc3	27.322	14.6557	39.9883	2.72852	1.44812	0.00224471	0.0103206
ENSMUSG00000052295	8030423F21Rik	6.14484	3.29812	8.99157	2.72627	1.44693	0.205801	0.411751
ENSMUSG00000082488	1700119I11Rik	135.928	72.9588	198.897	2.72616	1.44687	2.6493e-11	4.44719e-10
ENSMUSG00000027221	Chst1	726.499	390.132	1062.87	2.72438	1.44593	5.16276e-29	2.78637e-27
ENSMUSG00000087966		3.02738	1.62573	4.42903	2.72432	1.4459	0.454439	0.693966
ENSMUSG00000083360	Gm13105	58.0996	31.2129	84.9863	2.7228	1.44509	5.86774e-07	5.62906e-06
ENSMUSG00000088384		1.74836	0.939454	2.55726	2.72208	1.44471	0.405766	0.648869
ENSMUSG00000074847	Gm10775	1.74751	0.939454	2.55556	2.72026	1.44374	0.3242	0.560554
ENSMUSG00000064906	n-R5s204	3.02375	1.62573	4.42177	2.71986	1.44353	0.559831	0.782778
ENSMUSG00000053475	Tnfaip6	180.627	97.1561	264.097	2.71828	1.44269	8.78483e-14	1.83459e-12
ENSMUSG00000019082	Slc25a22	4506.65	2425.18	6588.13	2.71656	1.44178	2.37101e-45	2.65674e-43
ENSMUSG00000047976	Kcna1	34.2527	18.4364	50.069	2.71577	1.44136	2.90453e-05	0.000208842
ENSMUSG00000041624	Gucy1a2	141.874	76.3826	207.365	2.71482	1.44086	3.35065e-15	7.98728e-14
ENSMUSG00000092062	Gm7664	9.09779	4.89911	13.2965	2.71406	1.44045	0.0722192	0.190918
ENSMUSG00000059991	Nptx2	2.66231	1.43476	3.88985	2.71114	1.4389	0.472145	0.710295
ENSMUSG00000038521	C1s	979.957	528.13	1431.78	2.71105	1.43885	8.30879e-31	4.83926e-29
ENSMUSG00000031391	L1cam	123.102	66.3466	179.858	2.71088	1.43876	1.37165e-11	2.37101e-10
ENSMUSG00000038764	Ptpn3	2838.7	1530	4147.41	2.71073	1.43868	1.50067e-40	1.45929e-38
ENSMUSG00000074179	Gm10639	1.83793	0.990622	2.68523	2.71065	1.43864	0.510524	0.742733
ENSMUSG00000079536	Gm6880	1.56145	0.841632	2.28127	2.71053	1.43858	0.644499	0.846528
ENSMUSG00000004891	Nes	18346.3	9890.83	26801.8	2.70976	1.43817	7.13702e-48	8.75237e-46
ENSMUSG00000015981	Stk32c	383.945	206.995	560.894	2.7097	1.43813	7.89275e-21	2.65992e-19
ENSMUSG00000022116	4930449E01Rik	2.01843	1.08844	2.94841	2.70883	1.43767	0.651586	0.850468
ENSMUSG00000034686	Prr7	62.5635	33.7558	91.3711	2.70683	1.4366	3.7391e-06	3.15508e-05
ENSMUSG00000062563	Cys1	360.662	194.714	526.61	2.70454	1.43538	1.25183e-19	3.92513e-18
ENSMUSG00000037548	H2-DMb2	34.8459	18.8217	50.87	2.70273	1.43442	0.000745955	0.00391866
ENSMUSG00000042812	Foxf1a	15.8973	8.58852	23.206	2.70198	1.43402	0.0208165	0.0698574
ENSMUSG00000091849	Gm17188	9.01023	4.86817	13.1523	2.70169	1.43386	0.061167	0.167352
ENSMUSG00000021228	Acot3	242.721	131.145	354.297	2.70157	1.4338	2.29611e-17	6.31186e-16
ENSMUSG00000070644	Etnk2	76.5837	41.3988	111.769	2.6998	1.43285	8.6452e-07	8.08277e-06
ENSMUSG00000086605	Gm14290	1209.7	654.788	1764.62	2.69495	1.43026	3.2201e-35	2.33818e-33
ENSMUSG00000093730	Gm20690	2.39043	1.29496	3.48589	2.69188	1.42861	0.490401	0.726749
ENSMUSG00000052142	Rasal3	53.858	29.2015	78.5144	2.68871	1.42692	1.25754e-05	9.70592e-05
ENSMUSG00000041012	Cmtm8	633.356	343.423	923.289	2.68849	1.4268	3.22631e-26	1.53486e-24
ENSMUSG00000050272	Dscam	3.3131	1.79664	4.82957	2.68812	1.4266	0.292424	0.524368
ENSMUSG00000019966	Kitl	13451.1	7296.39	19605.8	2.68705	1.42602	2.782e-47	3.31945e-45
ENSMUSG00000084051	Gm15146	1.4737	0.799653	2.14776	2.68586	1.42538	0.687326	0.874822
ENSMUSG00000072596	Ear2	15.7587	8.55275	22.9646	2.68505	1.42495	0.012681	0.0458585
ENSMUSG00000076439	Mog	6.44697	3.50013	9.39382	2.68385	1.4243	0.167569	0.35599
ENSMUSG00000061833	Gm6311	122.414	66.475	178.353	2.68301	1.42385	8.17011e-09	1.02296e-07
ENSMUSG00000032380	Dapk2	177.574	96.4607	258.688	2.6818	1.4232	7.61478e-14	1.60237e-12
ENSMUSG00000077309	n-R5s8	10.7763	5.85412	15.6984	2.68161	1.4231	0.0791754	0.204867
ENSMUSG00000079436	Kcnj13	2.58192	1.40366	3.76017	2.67883	1.4216	0.307457	0.541212
ENSMUSG00000091575	2010016I18Rik	6.36021	3.45799	9.26244	2.67856	1.42146	0.0967473	0.238322
ENSMUSG00000046352	Gjb2	4.8846	2.65665	7.11255	2.67726	1.42076	0.182329	0.377129
ENSMUSG00000094929	Gm3526	3.31855	1.80583	4.83128	2.67538	1.41975	0.296248	0.528648
ENSMUSG00000072612	Gm10382	33.1978	18.0697	48.326	2.67442	1.41923	0.000270448	0.00158394
ENSMUSG00000060566	Rpl21-ps3	1.8457	1.00617	2.68523	2.66875	1.41617	0.51047	0.742733
ENSMUSG00000085278	Gm12841	1.8457	1.00617	2.68523	2.66875	1.41617	0.51047	0.742733
ENSMUSG00000092274	Neat1	38063.4	20751.2	55375.6	2.66855	1.41606	8.18439e-43	8.5218e-41
ENSMUSG00000080237	Gm14239	3.41493	1.86336	4.9665	2.66535	1.41433	0.357368	0.597748
ENSMUSG00000038624	Nepn	23.8217	13.0051	34.6384	2.66346	1.4133	0.00177252	0.00843792
ENSMUSG00000025981	Coq10b	3680.11	2009.52	5350.7	2.66267	1.41288	1.51187e-42	1.53793e-40
ENSMUSG00000094800		101.107	55.2387	146.976	2.66074	1.41183	2.47617e-07	2.53521e-06
ENSMUSG00000081347	Gm14702	1.66242	0.908351	2.41649	2.66031	1.41159	0.64641	0.847707
ENSMUSG00000078600	1700092K14Rik	16.6232	9.09004	24.1564	2.65746	1.41005	0.0233373	0.0766248
ENSMUSG00000027171	Prrg4	343.138	187.64	498.637	2.65742	1.41002	1.45331e-21	5.14933e-20
ENSMUSG00000079258	Calhm1	1.56645	0.857183	2.27572	2.65488	1.40865	1	1
ENSMUSG00000004892	Bcan	34.5565	18.916	50.1969	2.65368	1.40799	5.6449e-05	0.000384822
ENSMUSG00000018893	Mb	304640	166780	442500	2.6532	1.40773	2.88801e-45	3.20352e-43
ENSMUSG00000021933	Gucy1b2	5.45586	2.98742	7.92431	2.65256	1.40739	0.0990579	0.242471
ENSMUSG00000087674	4930447M23Rik	2.21407	1.21269	3.21544	2.65149	1.4068	0.490859	0.727094
ENSMUSG00000029778	Adcyap1r1	959.191	525.672	1392.71	2.64939	1.40566	1.48159e-29	8.11531e-28
ENSMUSG00000082946	Gm12177	105.961	58.1208	153.801	2.64623	1.40394	1.58783e-09	2.15824e-08
ENSMUSG00000020963	Tshr	3.32951	1.82774	4.83128	2.64331	1.40234	0.357609	0.597929
ENSMUSG00000029343	Crybb1	17.3052	9.50324	25.1072	2.64196	1.40161	0.00743514	0.0290432
ENSMUSG00000027744	Stoml3	17.12	9.40357	24.8363	2.64116	1.40117	0.0143499	0.0509177
ENSMUSG00000020810	Cygb	4258.68	2340.31	6177.05	2.63941	1.40022	1.41961e-39	1.33917e-37
ENSMUSG00000071237	Gm6253	5.54987	3.05131	8.04843	2.6377	1.39928	0.295561	0.528019
ENSMUSG00000029059	2810405K02Rik	2910.15	1600.22	4220.08	2.63719	1.399	2.55324e-36	1.97064e-34
ENSMUSG00000055148	Klf2	3849.68	2117.22	5582.15	2.63655	1.39865	8.56434e-37	6.80033e-35
ENSMUSG00000025429	Pstpip2	489.697	270.113	709.28	2.62586	1.39279	1.21398e-24	5.19328e-23
ENSMUSG00000073409	H2-Q6	82.9521	45.8001	120.104	2.62235	1.39086	5.46236e-07	5.26533e-06
ENSMUSG00000094849	Vmn2r-ps18	1.94304	1.07289	2.81319	2.62206	1.3907	0.650656	0.849671
ENSMUSG00000021250	Fos	702.589	388.038	1017.14	2.62123	1.39025	3.52342e-27	1.75964e-25
ENSMUSG00000056032	BC018473	2.50513	1.3836	3.62666	2.62118	1.39022	0.381296	0.623615
ENSMUSG00000092344	Hspe1-ps3	2.59747	1.43476	3.76017	2.62076	1.38999	0.307232	0.541032
ENSMUSG00000092768		2.04582	1.13042	2.96122	2.61957	1.38933	0.394517	0.637804
ENSMUSG00000093985	Gm10406	48.4274	26.7706	70.0843	2.61796	1.38844	2.04692e-05	0.000151623
ENSMUSG00000009114	2610028H24Rik	12.986	7.18019	18.7919	2.61719	1.38802	0.0136569	0.0488042
ENSMUSG00000079620	Muc4	23.202	12.8388	33.5651	2.61435	1.38645	0.00287574	0.0128163
ENSMUSG00000085546	Gm14252	1.94985	1.07925	2.82045	2.61333	1.38589	0.611752	0.822901
ENSMUSG00000040498	2210010C17Rik	113.516	62.8623	164.169	2.61156	1.38491	5.36496e-10	7.83874e-09
ENSMUSG00000031519	Asb5	433.088	239.983	626.192	2.60932	1.38367	1.23875e-20	4.1368e-19
ENSMUSG00000082116	Gm12188	2.78427	1.54346	4.02507	2.60782	1.38284	0.556707	0.780627
ENSMUSG00000034765	Dusp5	1701.58	944.512	2458.64	2.60308	1.38022	2.6971e-36	2.07442e-34
ENSMUSG00000050296	Abca12	230.933	128.197	333.67	2.60278	1.38005	1.4158e-14	3.16961e-13
ENSMUSG00000030385	2900092C05Rik	0.743993	0.41304	1.07495	2.60252	1.37991	0.565008	0.78611
ENSMUSG00000088318		0.743993	0.41304	1.07495	2.60252	1.37991	0.565008	0.78611
ENSMUSG00000023439	Gnb3	240.765	133.688	347.842	2.60189	1.37956	1.86191e-15	4.51152e-14
ENSMUSG00000086035	Gm12610	6.41124	3.56217	9.2603	2.59962	1.3783	0.233866	0.450486
ENSMUSG00000088920		1.11407	0.619561	1.60858	2.59632	1.37647	0.8755	0.976987
ENSMUSG00000056755	Grm7	5.48334	3.04962	7.91705	2.59608	1.37633	0.12022	0.279872
ENSMUSG00000048721	C030019I05Rik	55.5075	30.8793	80.1358	2.59513	1.37581	2.43475e-05	0.000178317
ENSMUSG00000056174	Col8a2	194.159	108.019	280.298	2.59489	1.37567	3.54181e-14	7.64241e-13
ENSMUSG00000025652	Tmem89	1.85529	1.0326	2.67797	2.59342	1.37486	0.759778	0.919392
ENSMUSG00000054622	D730045B01Rik	2.69566	1.50148	3.88985	2.59067	1.37332	0.472153	0.710295
ENSMUSG00000083817	Gm14400	22.223	12.3836	32.0623	2.58909	1.37244	0.0136271	0.0487289
ENSMUSG00000066272	Olfr559	10.2361	5.70964	14.7626	2.58555	1.37047	0.0935474	0.232201
ENSMUSG00000075334	Rprm	8.55855	4.77487	12.3422	2.58483	1.37007	0.172415	0.363666
ENSMUSG00000039395	Mreg	1431.55	798.957	2064.14	2.58355	1.36935	1.07269e-33	7.15366e-32
ENSMUSG00000081025	Gm11943	2.14423	1.19714	3.09132	2.58225	1.36863	0.206558	0.412743
ENSMUSG00000024670	Cd6	18.9096	10.5587	27.2605	2.5818	1.36838	0.00437783	0.0184596
ENSMUSG00000074881	Mageb3	4.56513	2.54964	6.58062	2.58101	1.36793	0.222495	0.43594
ENSMUSG00000088249		9.12919	5.09927	13.1591	2.58059	1.3677	0.142385	0.317026
ENSMUSG00000089453		2.51239	1.40366	3.62111	2.57976	1.36724	0.585067	0.80201
ENSMUSG00000073274	Gm14636	1.67989	0.939454	2.42034	2.57632	1.36531	0.326362	0.562997
ENSMUSG00000027377	Mall	1377.3	770.577	1984.03	2.57474	1.36442	1.56475e-31	9.38597e-30
ENSMUSG00000095991	Gm17048	1.40109	0.784102	2.01808	2.57375	1.36387	0.417162	0.659064
ENSMUSG00000011463	Cpb1	5.12733	2.86953	7.38513	2.57364	1.36381	0.122338	0.283398
ENSMUSG00000014776	Nol3	1427.37	798.849	2055.89	2.57356	1.36376	2.90907e-33	1.89984e-31
ENSMUSG00000044156	Hepacam2	6.34289	3.5513	9.13448	2.57215	1.36298	0.0804701	0.207294
ENSMUSG00000033685	Ucp2	16477.2	9230.88	23723.5	2.57002	1.36178	7.23572e-43	7.56973e-41
ENSMUSG00000054958	Nt5c1a	529.841	296.852	762.829	2.56972	1.36161	3.39705e-26	1.61261e-24
ENSMUSG00000071398	2410004P03Rik	17.3244	9.70791	24.9408	2.56912	1.36128	0.0267902	0.085942
ENSMUSG00000002797	Ggct	242.452	135.9	349.005	2.5681	1.3607	1.31316e-14	2.95481e-13
ENSMUSG00000021587	Pcsk1	49.4088	27.6998	71.1178	2.56744	1.36033	0.00037954	0.00213778
ENSMUSG00000085264	Gm15581	7.82833	4.39108	11.2656	2.56556	1.35927	0.186282	0.382867
ENSMUSG00000062017	Abca14	3.73168	2.09462	5.36875	2.56312	1.3579	0.234919	0.45159
ENSMUSG00000032978	Guca2b	1.86669	1.04815	2.68523	2.56187	1.3572	0.610195	0.821813
ENSMUSG00000022288	4930447A16Rik	1.30512	0.732934	1.87731	2.56137	1.35691	0.68453	0.873024
ENSMUSG00000094955		1.02824	0.577582	1.4789	2.56051	1.35643	0.429186	0.670823
ENSMUSG00000042793	Lgr6	2301.77	1293.69	3309.85	2.55846	1.35527	1.29563e-37	1.07518e-35
ENSMUSG00000026581	Sell	68.4443	38.4744	98.4142	2.55791	1.35497	4.47933e-07	4.37508e-06
ENSMUSG00000038676	Ucn	3.55203	1.9968	5.10727	2.55773	1.35487	0.236728	0.453724
ENSMUSG00000030862	Cpxm2	66.5569	37.4232	95.6905	2.55698	1.35444	7.75356e-07	7.31419e-06
ENSMUSG00000068105	Tnfrsf13c	16.6211	9.3524	23.8898	2.5544	1.35299	0.0144764	0.0512677
ENSMUSG00000035606	Ky	2810.95	1582.36	4039.54	2.55286	1.35211	3.78828e-34	2.58893e-32
ENSMUSG00000017417	Plxdc1	418.967	236.086	601.848	2.54927	1.35008	7.11976e-22	2.568e-20
ENSMUSG00000086012	Gm15902	2.79341	1.57457	4.01226	2.54817	1.34946	1	1
ENSMUSG00000039202	Abhd2	4256.9	2399.65	6114.14	2.54793	1.34933	1.14912e-39	1.08865e-37
ENSMUSG00000058145	Adamts17	1273.82	718.111	1829.54	2.54771	1.3492	4.41526e-32	2.73771e-30
ENSMUSG00000048368	Omd	45.4211	25.6147	65.2274	2.54648	1.3485	6.8054e-05	0.000454393
ENSMUSG00000056468	5730596B20Rik	10.0999	5.69708	14.5028	2.54565	1.34804	0.0701597	0.186389
ENSMUSG00000028434	Epb4.1l4b	540.792	305.078	776.506	2.54527	1.34782	9.17694e-24	3.68983e-22
ENSMUSG00000089082		1.12547	0.635112	1.61583	2.54417	1.3472	0.680627	0.870714
ENSMUSG00000022235	Cmbl	974.799	550.494	1399.11	2.54155	1.34571	4.13433e-28	2.16259e-26
ENSMUSG00000073514	Dok6	1.12462	0.635112	1.61413	2.54148	1.34567	0.536304	0.765
ENSMUSG00000076356		3.5581	2.01235	5.10386	2.53627	1.34271	0.157238	0.340481
ENSMUSG00000065561	Mir369	1.77894	1.00617	2.55171	2.53606	1.34259	0.648342	0.848209
ENSMUSG00000048387	Osr1	156.099	88.3603	223.838	2.53324	1.34098	1.20436e-10	1.88546e-09
ENSMUSG00000031543	Ank1	13456.4	7617.88	19294.9	2.53285	1.34076	2.1399e-39	1.99308e-37
ENSMUSG00000051354	Samd3	1.12184	0.635112	1.60858	2.53274	1.3407	0.876138	0.977361
ENSMUSG00000083016	Gm11703	1.12184	0.635112	1.60858	2.53274	1.3407	0.876138	0.977361
ENSMUSG00000080907	4930455H04Rik	6.00513	3.40046	8.60981	2.53196	1.34025	0.0557704	0.155635
ENSMUSG00000069892	9930111J21Rik2	1014.49	574.578	1454.4	2.53125	1.33985	1.53462e-31	9.23031e-30
ENSMUSG00000032915	Emr4	58.617	33.2033	84.0308	2.5308	1.33959	3.03548e-05	0.00021762
ENSMUSG00000029307	Dmp1	9.35645	5.30128	13.4116	2.52989	1.33907	0.16364	0.350222
ENSMUSG00000041378	Cldn5	5328.58	3020.54	7636.62	2.52823	1.33813	2.69435e-39	2.47813e-37
ENSMUSG00000038732	Mboat1	195.976	111.153	280.799	2.52624	1.33699	3.28093e-13	6.55413e-12
ENSMUSG00000001542	Ell2	935.466	530.752	1340.18	2.52506	1.33632	2.83172e-30	1.60276e-28
ENSMUSG00000083650	Gm13357	4.77814	2.71418	6.8421	2.52088	1.33392	0.221519	0.434563
ENSMUSG00000063296	Tmem117	539.979	306.737	773.222	2.5208	1.33388	2.0057e-24	8.4492e-23
ENSMUSG00000025586	Cpeb1	726.151	412.713	1039.59	2.51891	1.3328	8.72215e-28	4.45678e-26
ENSMUSG00000011751	Spnb4	127.236	72.3588	182.113	2.5168	1.33159	1.71777e-09	2.32056e-08
ENSMUSG00000065590	Mir212	1.40609	0.799653	2.01253	2.51676	1.33157	0.686288	0.873904
ENSMUSG00000080613		1.40609	0.799653	2.01253	2.51676	1.33157	0.686288	0.873904
ENSMUSG00000089781	Gm15756	1.40609	0.799653	2.01253	2.51676	1.33157	0.686288	0.873904
ENSMUSG00000057280	Musk	5.25111	2.98742	7.5148	2.51548	1.33084	0.17855	0.371919
ENSMUSG00000038201	Kcna7	103.849	59.0864	148.612	2.51516	1.33065	1.53322e-08	1.86676e-07
ENSMUSG00000085696	2700086A05Rik	12.2016	6.94256	17.4606	2.51501	1.33056	0.0381355	0.114578
ENSMUSG00000091228	Gm20390	12.6618	7.20477	18.1188	2.51483	1.33046	0.0441084	0.128926
ENSMUSG00000073610	Gm10549	10.7833	6.13655	15.4301	2.51447	1.33025	0.0404491	0.120091
ENSMUSG00000046733	Gprc5a	257.795	146.735	368.855	2.51375	1.32984	1.13994e-14	2.58348e-13
ENSMUSG00000033715	Akr1c14	722.765	411.476	1034.05	2.51303	1.32943	2.32114e-27	1.16712e-25
ENSMUSG00000092867	Mir3058	21.8436	12.4383	31.2489	2.5123	1.32901	0.0348795	0.106359
ENSMUSG00000084970	1700060J05Rik	22.594	12.8662	32.3217	2.51213	1.32891	0.0245695	0.0798972
ENSMUSG00000030402	Ppm1n	4.78443	2.72505	6.84381	2.51144	1.32851	0.314844	0.550224
ENSMUSG00000039137	Whrn	1198.97	682.942	1715.01	2.5112	1.32838	1.75742e-30	1.00762e-28
ENSMUSG00000032925	Itgbl1	198.956	113.373	284.539	2.50977	1.32755	1.14349e-12	2.16293e-11
ENSMUSG00000093537	Gm7584	9.02251	5.14141	12.9036	2.50974	1.32754	0.043004	0.126115
ENSMUSG00000073421	H2-Ab1	91.3922	52.084	130.7	2.50942	1.32735	6.42539e-08	7.19969e-07
ENSMUSG00000022382	Wnt7b	5.06868	2.8896	7.24777	2.50823	1.32667	0.2616	0.486176
ENSMUSG00000022947	Cbr3	85.4027	48.6969	122.109	2.50752	1.32626	3.5317e-07	3.51482e-06
ENSMUSG00000068079	Tcf15	1006.38	574.171	1438.58	2.50549	1.32509	2.78064e-25	1.25521e-23
ENSMUSG00000086384	Gm12357	253.268	144.502	362.034	2.5054	1.32504	2.69198e-14	5.86023e-13
ENSMUSG00000037016	Frem2	5192.02	2965.08	7418.96	2.50211	1.32315	3.39202e-38	2.89094e-36
ENSMUSG00000031958	Ldhd	381.465	217.897	545.032	2.50133	1.32269	1.10051e-19	3.48034e-18
ENSMUSG00000000673	Haao	17.2708	9.86778	24.6738	2.50044	1.32218	0.0417736	0.123258
ENSMUSG00000014846	Tppp3	1316.99	752.599	1881.38	2.49985	1.32184	8.8832e-31	5.16021e-29
ENSMUSG00000095771		2.53763	1.45032	3.62495	2.49942	1.32159	0.308098	0.541996
ENSMUSG00000090475	Gm6245	3.28748	1.87891	4.69606	2.49935	1.32156	0.35772	0.597933
ENSMUSG00000047678	Gpr82	4.78632	2.73609	6.83655	2.49866	1.32115	0.377661	0.619537
ENSMUSG00000060981	Hist1h4h	147.317	84.2725	210.362	2.49621	1.31974	1.70209e-11	2.91707e-10
ENSMUSG00000032523	Hhatl	5122.6	2931.18	7314.03	2.49525	1.31918	2.3812e-38	2.06128e-36
ENSMUSG00000033377	Palmd	6989.17	4002.6	9975.73	2.49231	1.31748	2.65928e-38	2.27523e-36
ENSMUSG00000082630	Gm14834	11.3791	6.51849	16.2398	2.49134	1.31692	0.0465329	0.134781
ENSMUSG00000078554	1700125D06Rik	3.01741	1.72992	4.30491	2.4885	1.31528	0.242184	0.46074
ENSMUSG00000086414	Gm15645	9.78502	5.61198	13.9581	2.48719	1.31452	0.154927	0.336666
ENSMUSG00000026870	D730039F16Rik	35.2972	20.2503	50.3441	2.48609	1.31388	0.000466146	0.00257436
ENSMUSG00000092394	Gm20445	6.11799	3.511	8.72497	2.48503	1.31327	0.165185	0.352775
ENSMUSG00000061013	Mkx	17.302	9.93014	24.6738	2.48474	1.31309	0.0365546	0.11049
ENSMUSG00000039813	Tbc1d2	394.091	226.254	561.929	2.48362	1.31244	8.0423e-20	2.56911e-18
ENSMUSG00000086541	Has2as	18.3617	10.545	26.1783	2.48253	1.31181	0.0115681	0.042382
ENSMUSG00000079560	Hoxa3	51.2401	29.4408	73.0395	2.48089	1.31086	6.80065e-05	0.000454393
ENSMUSG00000050821	Fam131a	1230.18	707.019	1753.34	2.47991	1.31029	3.37388e-28	1.77745e-26
ENSMUSG00000039809	Gabbr2	7.91248	4.54828	11.2767	2.47933	1.30995	0.126329	0.290568
ENSMUSG00000055639	Dach1	2146.15	1234.4	3057.9	2.47724	1.30873	2.24537e-33	1.47512e-31
ENSMUSG00000087939		2.26201	1.30133	3.2227	2.47647	1.30829	0.471523	0.709914
ENSMUSG00000095062		21.0219	12.0977	29.9462	2.47537	1.30764	0.00220779	0.0101807
ENSMUSG00000081861	Gm14441	1.60536	0.923903	2.28682	2.47518	1.30753	0.408942	0.651398
ENSMUSG00000089498		3.58262	2.06351	5.10172	2.47235	1.30588	0.356847	0.597406
ENSMUSG00000094988		1.12962	0.650663	1.60858	2.47221	1.3058	0.876771	0.977774
ENSMUSG00000071984	Fndc1	8393.21	4836.81	11949.6	2.47056	1.30484	4.17656e-38	3.53232e-36
ENSMUSG00000031390	Avpr2	6.77913	3.90681	9.65145	2.47042	1.30476	0.331215	0.568618
ENSMUSG00000045518	Onecut3	1.7913	1.0326	2.55001	2.4695	1.30422	0.608661	0.820744
ENSMUSG00000030200	Bcl2l14	1.60259	0.923903	2.28127	2.46917	1.30402	0.645306	0.847079
ENSMUSG00000067795	4930444P10Rik	1.60259	0.923903	2.28127	2.46917	1.30402	0.645306	0.847079
ENSMUSG00000033544	Angptl1	168.976	97.4276	240.524	2.46875	1.30378	1.07799e-11	1.88108e-10
ENSMUSG00000033006	Sox10	57.6063	33.2173	81.9952	2.46845	1.3036	2.36537e-05	0.000173581
ENSMUSG00000028680	Plk3	589.375	340.109	838.641	2.4658	1.30205	6.28074e-23	2.39449e-21
ENSMUSG00000035429	Ptprh	1.51217	0.872734	2.1516	2.46535	1.30179	0.411035	0.653452
ENSMUSG00000026574	Dpt	9864.78	5696.8	14032.8	2.46327	1.30057	6.38164e-35	4.57365e-33
ENSMUSG00000079407	1700110I01Rik	13.4916	7.79338	19.1899	2.46233	1.30002	0.0499105	0.142803
ENSMUSG00000034731	Dgkh	530.546	306.511	754.582	2.46185	1.29974	2.07701e-26	9.9453e-25
ENSMUSG00000084447		1.51024	0.872734	2.14776	2.46095	1.29922	0.813347	0.947881
ENSMUSG00000045730	Adrb2	89.1058	51.5043	126.707	2.46013	1.29874	4.63299e-07	4.51318e-06
ENSMUSG00000020593	Lpin1	6836.57	3952.7	9720.44	2.45919	1.29818	3.78058e-36	2.88763e-34
ENSMUSG00000041828	Abca8a	6441.7	3726.11	9157.29	2.4576	1.29725	5.19029e-36	3.91025e-34
ENSMUSG00000020826	Nos2	1198.33	693.34	1703.32	2.45668	1.29671	1.58118e-28	8.41036e-27
ENSMUSG00000016239	Lonrf3	95.7996	55.4438	136.155	2.45574	1.29616	7.86365e-08	8.69651e-07
ENSMUSG00000030717	Nupr1	144.196	83.4687	204.923	2.45508	1.29577	4.28797e-10	6.30177e-09
ENSMUSG00000031647	Mfap3l	508.387	294.429	722.345	2.45338	1.29477	7.14016e-22	2.57116e-20
ENSMUSG00000043099	Hic1	2516.75	1457.7	3575.81	2.45305	1.29458	6.55977e-33	4.19711e-31
ENSMUSG00000093771	AU023070	5.29779	3.06969	7.5259	2.45168	1.29377	0.0824371	0.211079
ENSMUSG00000000794	Kcnn3	225.05	130.474	319.625	2.44972	1.29261	4.68962e-15	1.10244e-13
ENSMUSG00000046491	C1qtnf2	642.525	372.595	912.454	2.44891	1.29214	1.21929e-22	4.5851e-21
ENSMUSG00000084052	Gm11745	2.9287	1.69882	4.15858	2.44793	1.29156	0.528835	0.759326
ENSMUSG00000019990	Pde7b	1792.48	1040.2	2544.76	2.44641	1.29067	9.22212e-31	5.34302e-29
ENSMUSG00000045746	B230317F23Rik	9.65388	5.60562	13.7021	2.44436	1.28945	0.0976516	0.240014
ENSMUSG00000037014	Sstr4	78.8418	45.7833	111.9	2.44413	1.28932	1.34185e-05	0.000103084
ENSMUSG00000087691	Gm15674	78.8002	45.8001	111.8	2.44105	1.2875	1.94279e-06	1.72376e-05
ENSMUSG00000051359	Ncald	1826.77	1062.23	2591.31	2.43951	1.28659	2.18819e-30	1.2417e-28
ENSMUSG00000092076	Gm4482	1.23337	0.717382	1.74935	2.43852	1.286	0.534628	0.763837
ENSMUSG00000044407	Qk	40.9601	23.8307	58.0896	2.4376	1.28546	0.000397225	0.00222886
ENSMUSG00000074465	Gm10701	3.31669	1.93008	4.70331	2.43685	1.28502	0.292398	0.524364
ENSMUSG00000086255	Gm11534	2.08333	1.21269	2.95397	2.43587	1.28444	0.491087	0.727094
ENSMUSG00000006204	5430419D17Rik	27.7489	16.1552	39.3426	2.43529	1.2841	0.000298403	0.00172795
ENSMUSG00000073569	Gm10540	1.41845	0.826081	2.01083	2.43418	1.28343	0.641335	0.84452
ENSMUSG00000025215	Tlx1	159.554	92.9663	226.142	2.43251	1.28245	2.09897e-10	3.21125e-09
ENSMUSG00000048521	Cxcr6	25.6856	14.9689	36.4023	2.43186	1.28206	0.00167559	0.00803609
ENSMUSG00000096791		1.23059	0.717382	1.7438	2.43078	1.28142	0.884511	0.981679
ENSMUSG00000008489	Elavl2	104.697	61.0566	148.336	2.42949	1.28065	4.299e-09	5.54948e-08
ENSMUSG00000035540	Gc	1.99099	1.16153	2.82045	2.42823	1.2799	0.612474	0.823621
ENSMUSG00000020846	Fam101b	5885.6	3434.78	8336.41	2.42706	1.27921	5.74113e-37	4.62517e-35
ENSMUSG00000096470	Gm9603	4.17125	2.43458	5.90793	2.42668	1.27898	0.230114	0.445585
ENSMUSG00000022044	Stmn4	78.677	45.9342	111.42	2.42564	1.27836	1.51646e-06	1.3719e-05
ENSMUSG00000093658	Gm20617	4.17636	2.44094	5.91177	2.42193	1.27616	0.154393	0.335837
ENSMUSG00000033730	Egr3	132.363	77.3663	187.359	2.42172	1.27603	3.96174e-10	5.8496e-09
ENSMUSG00000080601		6.9126	4.04193	9.78326	2.42044	1.27527	0.30698	0.54076
ENSMUSG00000087197	Gm13780	1.51909	0.888286	2.14989	2.42027	1.27517	0.331683	0.569063
ENSMUSG00000085371	Gm3160	0.759545	0.444143	1.07495	2.42027	1.27517	0.56436	0.785813
ENSMUSG00000022210	Dhrs4	4562.3	2668.12	6456.48	2.41986	1.27492	2.93384e-34	2.01695e-32
ENSMUSG00000037580	Gch1	813.829	476.262	1151.4	2.41757	1.27356	4.25407e-25	1.89706e-23
ENSMUSG00000087075	A230065H16Rik	3.80062	2.22523	5.37601	2.41593	1.27258	0.277849	0.506293
ENSMUSG00000036492	Rnf39	21.4549	12.5636	30.3463	2.41542	1.27227	0.00548781	0.022408
ENSMUSG00000026532	Spna1	2664.03	1560.2	3767.86	2.41499	1.27202	7.16906e-33	4.57369e-31
ENSMUSG00000074828	Gm10768	1.13739	0.666214	1.60858	2.4145	1.27173	0.877398	0.978314
ENSMUSG00000095419	Gm14328	1.13739	0.666214	1.60858	2.4145	1.27173	0.877398	0.978314
ENSMUSG00000038793	Lefty1	64.2526	37.6365	90.8686	2.41438	1.27165	6.06844e-06	4.93569e-05
ENSMUSG00000038128	Camk4	206.715	121.102	292.327	2.41389	1.27136	1.16118e-13	2.39327e-12
ENSMUSG00000037624	Kcnk2	486.281	284.887	687.674	2.41385	1.27133	6.06382e-19	1.83109e-17
ENSMUSG00000048388	Fam171b	275.891	161.814	389.968	2.40998	1.26902	4.85988e-15	1.14003e-13
ENSMUSG00000034442	Trmt5	2266.43	1330.25	3202.62	2.40754	1.26756	4.66494e-32	2.87702e-30
ENSMUSG00000030351	Tspan11	215.791	126.68	304.901	2.40685	1.26715	5.38735e-12	9.60585e-11
ENSMUSG00000024669	Cd5	24.0436	14.1164	33.9708	2.40648	1.26692	0.00508805	0.0209893
ENSMUSG00000031709	Tbc1d9	1055.59	619.773	1491.41	2.40638	1.26686	2.05105e-27	1.03367e-25
ENSMUSG00000033731	3300002A11Rik	2.27619	1.33694	3.21544	2.40507	1.26608	0.581411	0.799083
ENSMUSG00000084217	Gm15488	1.81048	1.0637	2.55726	2.40411	1.26551	0.491123	0.727094
ENSMUSG00000033327	Tnxb	12473.9	7329.19	17618.6	2.4039	1.26538	1.26023e-37	1.04975e-35
ENSMUSG00000050587	Lrrc4c	52.6546	30.9413	74.3678	2.40351	1.26514	3.17662e-05	0.000227075
ENSMUSG00000054568	Dub1	17.9438	10.545	25.3426	2.40328	1.265	0.0701352	0.186378
ENSMUSG00000030798	Cd37	164.256	96.5827	231.929	2.40136	1.26385	1.59736e-10	2.47439e-09
ENSMUSG00000060512	0610040J01Rik	37.0042	21.7653	52.2432	2.4003	1.26321	0.000381069	0.00214585
ENSMUSG00000037379	Spon2	3014.56	1773.48	4255.65	2.3996	1.2628	1.86028e-32	1.17325e-30
ENSMUSG00000036928	Stag3	215.322	126.684	303.96	2.39936	1.26265	4.61234e-11	7.55288e-10
ENSMUSG00000020905	Usp43	778.765	458.201	1099.33	2.39923	1.26257	6.97036e-24	2.83359e-22
ENSMUSG00000030302	Atp2b2	34.1474	20.0929	48.2019	2.39895	1.2624	0.000547651	0.00296805
ENSMUSG00000085223	Gm11210	7.61224	4.47971	10.7448	2.39854	1.26215	0.108611	0.259586
ENSMUSG00000036144	Meox2	2531.9	1490.54	3573.26	2.3973	1.26141	2.49554e-32	1.56496e-30
ENSMUSG00000066438	3830431G21Rik	57.2592	33.7128	80.8055	2.39688	1.26116	4.18005e-05	0.000291576
ENSMUSG00000034040	Wbscr17	731.523	430.832	1032.21	2.39586	1.26054	1.39443e-22	5.21706e-21
ENSMUSG00000066026	Dhrs3	2822.53	1662.88	3982.18	2.39475	1.25988	2.4744e-32	1.55612e-30
ENSMUSG00000074783	AU019990	9.69926	5.71432	13.6842	2.39472	1.25986	0.112528	0.266719
ENSMUSG00000086504	4930511F01Rik	1.33071	0.784102	1.87731	2.39422	1.25956	0.685001	0.873248
ENSMUSG00000033409	Syce1l	6.65949	3.92687	9.39211	2.39175	1.25807	0.164233	0.351048
ENSMUSG00000073594	Gm10545	1.42708	0.841632	2.01253	2.39123	1.25775	0.808456	0.945526
ENSMUSG00000024978	Gpam	9224.32	5441.5	13007.1	2.39036	1.25723	2.18119e-36	1.69533e-34
ENSMUSG00000091160	Gm17133	20.1039	11.8601	28.3478	2.39019	1.25713	0.00792747	0.0307056
ENSMUSG00000088575		1.05009	0.619561	1.48061	2.38978	1.25688	0.67861	0.869141
ENSMUSG00000065999	Gm13154	39.0272	23.0347	55.0197	2.38855	1.25614	0.00204954	0.0095648
ENSMUSG00000011305	Plin5	5254.67	3102.28	7407.06	2.38762	1.25557	1.3442e-33	8.8838e-32
ENSMUSG00000085985	Gm11682	1.04923	0.619561	1.4789	2.38702	1.25521	0.537407	0.765831
ENSMUSG00000089936	Gm16199	1.04923	0.619561	1.4789	2.38702	1.25521	0.537407	0.765831
ENSMUSG00000043621	Ubxn10	163.775	96.7128	230.837	2.38684	1.2551	5.5418e-11	8.98594e-10
ENSMUSG00000066176	Gm12511	3.90574	2.3075	5.50397	2.38525	1.25414	0.335544	0.57377
ENSMUSG00000054342	Kcnn4	62.6591	37.0196	88.2986	2.38518	1.2541	1.38706e-05	0.000106238
ENSMUSG00000029675	Eln	25160.5	14869.2	35451.8	2.38425	1.25353	2.96493e-33	1.93062e-31
ENSMUSG00000053214	Gm9899	164.734	97.3674	232.101	2.38377	1.25324	4.63785e-11	7.5834e-10
ENSMUSG00000094840		38.2025	22.5822	53.8227	2.38341	1.25303	0.000834015	0.00431958
ENSMUSG00000024899	Papss2	951.889	562.749	1341.03	2.383	1.25278	8.92595e-25	3.86336e-23
ENSMUSG00000001901	Kcnh6	16.0978	9.5233	22.6724	2.38072	1.2514	0.0366293	0.11067
ENSMUSG00000084674		1.04646	0.619561	1.47335	2.37806	1.24979	0.869701	0.9748
ENSMUSG00000005268	Prlr	236.335	139.982	332.688	2.37665	1.24893	7.90397e-14	1.66164e-12
ENSMUSG00000014030	Pax5	6.29174	3.72671	8.85677	2.37656	1.24888	0.115713	0.272308
ENSMUSG00000086233	Gm11816	129.695	76.827	182.562	2.37628	1.2487	8.74136e-10	1.24248e-08
ENSMUSG00000005696	Sh2d1a	6.00132	3.55581	8.44684	2.3755	1.24823	0.403827	0.647026
ENSMUSG00000075529	BC028471	2.95343	1.74998	4.15688	2.37538	1.24816	0.435622	0.676625
ENSMUSG00000086507	Gm11206	70.6187	41.844	99.3935	2.37533	1.24813	0.000102409	0.00065829
ENSMUSG00000028086	Fbxw7	6129.86	3632.81	8626.91	2.37472	1.24776	1.13878e-33	7.5488e-32
ENSMUSG00000075224	Lrrc55	239.535	141.96	337.111	2.37469	1.24774	1.11012e-12	2.10161e-11
ENSMUSG00000089908	Gm16558	2.9594	1.75466	4.16413	2.37319	1.24683	0.299914	0.533036
ENSMUSG00000028804	Csmd2	30.2743	17.9518	42.5968	2.37285	1.24662	0.000938503	0.00480216
ENSMUSG00000036766	Dner	19.8566	11.7778	27.9353	2.37187	1.24602	0.00427542	0.0180796
ENSMUSG00000053442	4930597O21Rik	1.90505	1.13042	2.67968	2.37051	1.2452	0.95123	1
ENSMUSG00000033249	Hsf4	75.2101	44.6319	105.788	2.37024	1.24503	2.53281e-06	2.20462e-05
ENSMUSG00000079101	Gm2904	1.52998	0.908351	2.1516	2.36869	1.24409	0.410634	0.653097
ENSMUSG00000013584	Aldh1a2	3513.61	2086.44	4940.78	2.36805	1.2437	1.60529e-31	9.60302e-30
ENSMUSG00000087272	Gm15409	1.81741	1.07925	2.55556	2.36789	1.2436	0.397495	0.641162
ENSMUSG00000002020	Ltbp2	619.873	368.285	871.46	2.36627	1.24261	1.73022e-21	6.10108e-20
ENSMUSG00000052305	Hbb-b1	21204.6	12598.3	29810.8	2.36626	1.24261	6.41552e-38	5.4052e-36
ENSMUSG00000076464	Trbv4	2.29134	1.36168	3.22099	2.36545	1.24211	0.312971	0.548513
ENSMUSG00000024053	Emilin2	17812.6	10586.8	25038.4	2.36506	1.24188	3.64014e-36	2.79002e-34
ENSMUSG00000028749	Pla2g2f	1.52805	0.908351	2.14776	2.36445	1.24151	0.814347	0.948396
ENSMUSG00000054978	Kbtbd13	129.602	77.0588	182.145	2.36372	1.24106	1.12179e-08	1.38183e-07
ENSMUSG00000024793	Tnfrsf25	323.514	192.399	454.628	2.36294	1.24058	2.40531e-15	5.76491e-14
ENSMUSG00000048834	Vstm2a	5.1615	3.06969	7.25332	2.36289	1.24055	0.178982	0.372546
ENSMUSG00000090552	Gm17158	1.5272	0.908351	2.14605	2.36258	1.24036	0.643793	0.846449
ENSMUSG00000055413	H2-Q5	48.7386	28.9905	68.4868	2.36239	1.24025	4.0533e-05	0.00028431
ENSMUSG00000027577	Chrna4	21.9586	13.0634	30.8539	2.36186	1.23992	0.0400571	0.119156
ENSMUSG00000030165	Klrd1	7.64516	4.55111	10.7392	2.35969	1.2386	0.131259	0.299146
ENSMUSG00000026489	Adck3	25563.2	15223.4	35902.9	2.3584	1.23781	2.36263e-36	1.82992e-34
ENSMUSG00000041716	AK010878	26.2848	15.6645	36.9051	2.35597	1.23632	0.00348128	0.0151004
ENSMUSG00000071424	Grid2	5.74266	3.42237	8.06294	2.35595	1.23631	0.240441	0.458609
ENSMUSG00000024743	Syt7	3535.48	2107.36	4963.6	2.35536	1.23595	2.60653e-32	1.62993e-30
ENSMUSG00000049307	Fut4	137.769	82.1191	193.418	2.35533	1.23593	2.35881e-08	2.79187e-07
ENSMUSG00000021057	Akap5	597.297	356.071	838.523	2.35493	1.23568	4.49333e-21	1.54255e-19
ENSMUSG00000054580	Pla2r1	657.872	392.221	923.524	2.3546	1.23548	2.08466e-21	7.31585e-20
ENSMUSG00000042834	D0H4S114	26517.6	15811.8	37223.4	2.35415	1.23521	2.80257e-34	1.93325e-32
ENSMUSG00000032089	Il10ra	216.891	129.412	304.37	2.35195	1.23385	3.41852e-11	5.66519e-10
ENSMUSG00000092273	Rnf169	10.7262	6.4006	15.0518	2.35162	1.23366	0.0243242	0.0792521
ENSMUSG00000082778	Gm15191	38.4369	22.9375	53.9362	2.35144	1.23354	0.00159323	0.00768552
ENSMUSG00000027408	Cpxm1	771.165	460.527	1081.8	2.34906	1.23208	9.9466e-21	3.34188e-19
ENSMUSG00000080223	Gm13768	1.43486	0.857183	2.01253	2.34785	1.23134	0.808929	0.945791
ENSMUSG00000067879	3110035E14Rik	35.8767	21.4328	50.3206	2.34783	1.23133	0.000812115	0.00422101
ENSMUSG00000083208	Gm11522	1.33848	0.799653	1.87731	2.34766	1.23122	0.68514	0.873248
ENSMUSG00000028487	Bnc2	31.1057	18.5852	43.6261	2.34735	1.23104	0.00254448	0.0115025
ENSMUSG00000026409	Pfkfb2	8476.18	5068.18	11884.2	2.34486	1.2295	5.93301e-34	4.04214e-32
ENSMUSG00000062961	Gm1568	5.07415	3.03576	7.11255	2.34292	1.22831	0.349327	0.588876
ENSMUSG00000084644		7.94954	4.75763	11.1415	2.34181	1.22762	0.108001	0.258459
ENSMUSG00000020620	Abca8b	1851.63	1109.13	2594.12	2.33888	1.22581	4.40948e-29	2.38566e-27
ENSMUSG00000085102	1700010K24Rik	2.87709	1.72356	4.03062	2.33855	1.22561	0.369424	0.611432
ENSMUSG00000045658	Pid1	947.161	567.6	1326.72	2.33742	1.22492	2.73642e-25	1.23778e-23
ENSMUSG00000049265	Kcnk3	10469.8	6275.88	14663.8	2.33653	1.22437	2.94218e-34	2.01695e-32
ENSMUSG00000089755	0610012D04Rik	9.78889	5.86967	13.7081	2.33541	1.22368	0.0414497	0.122563
ENSMUSG00000088615		5.65225	3.38958	7.91491	2.33507	1.22347	0.305793	0.539885
ENSMUSG00000035279	A430110N23Rik	1726.8	1035.63	2417.98	2.3348	1.2233	8.35155e-28	4.28726e-26
ENSMUSG00000056359	D830013O20Rik	24.1326	14.4736	33.7916	2.33471	1.22324	0.0350041	0.106592
ENSMUSG00000050222	Il17d	393.888	236.274	551.501	2.33416	1.2229	2.07284e-15	5.00612e-14
ENSMUSG00000085887	Gm11648	28.2976	16.9779	39.6173	2.33347	1.22247	0.00213375	0.00989341
ENSMUSG00000074661	Pde4d	1693.9	1016.39	2371.41	2.33316	1.22228	1.92116e-27	9.72652e-26
ENSMUSG00000095649		10.8367	6.50294	15.1704	2.33285	1.22209	0.0649618	0.175667
ENSMUSG00000064621	AF357355	2.6824	1.61018	3.75462	2.3318	1.22144	0.555205	0.779469
ENSMUSG00000086321	Gm11413	2.11572	1.27022	2.96122	2.33126	1.22111	0.470972	0.709398
ENSMUSG00000034457	Eda2r	946.809	568.664	1324.95	2.32994	1.2203	9.98942e-25	4.30677e-23
ENSMUSG00000086578	Gm13583	0.961486	0.577582	1.34539	2.32935	1.21993	0.556323	0.780244
ENSMUSG00000020785	Camkk1	191.523	115.054	267.993	2.32928	1.21988	1.50575e-10	2.33905e-09
ENSMUSG00000031409	Tceal6	19.9298	11.9798	27.8798	2.32724	1.21862	0.0910933	0.227414
ENSMUSG00000040488	Ltbp4	42705.8	25672.9	59738.7	2.32692	1.21842	7.04061e-36	5.25049e-34
ENSMUSG00000054779	Gm12541	6.6269	3.98625	9.26756	2.32488	1.21716	0.259542	0.483307
ENSMUSG00000079499	6530402F18Rik	102.378	61.5894	143.167	2.32454	1.21695	4.07078e-06	3.40631e-05
ENSMUSG00000009210	2310007L24Rik	140.484	84.5521	196.416	2.32302	1.216	1.67894e-09	2.27229e-08
ENSMUSG00000085550	Gm15658	1.43945	0.866372	2.01253	2.32294	1.21595	0.686813	0.87432
ENSMUSG00000034792	Gna15	35.0038	21.0717	48.9359	2.32236	1.21559	0.0237208	0.0777335
ENSMUSG00000022546	Gpt	1023.88	616.413	1431.35	2.32206	1.2154	2.63669e-24	1.10232e-22
ENSMUSG00000045733	Sprn	27.6396	16.6414	38.6378	2.32178	1.21523	0.0076294	0.0296865
ENSMUSG00000020042	Btbd11	96.651	58.1925	135.11	2.32177	1.21522	3.40117e-08	3.94107e-07
ENSMUSG00000050633	1110035H17Rik	13.3468	8.03737	18.6563	2.32119	1.21486	0.056185	0.156693
ENSMUSG00000086059	Gm15797	5.0782	3.0605	7.0959	2.31854	1.21322	0.840296	0.961027
ENSMUSG00000087242	C78197	46.6781	28.1587	65.1975	2.31536	1.21123	0.0027119	0.0121603
ENSMUSG00000044576	Fam59b	33.17	20.0453	46.2947	2.30951	1.20758	0.00921712	0.0348866
ENSMUSG00000003469	Phyhip	1908.91	1153.68	2664.15	2.30926	1.20743	1.82358e-28	9.67637e-27
ENSMUSG00000021213	Akr1c13	57.1941	34.5668	79.8214	2.30919	1.20739	0.000475095	0.00261425
ENSMUSG00000050860	Phospho1	334.976	202.478	467.473	2.30876	1.20712	2.221e-13	4.4896e-12
ENSMUSG00000010529	Gm266	37.2031	22.4937	51.9125	2.30787	1.20656	0.002899	0.0129043
ENSMUSG00000065444	Mir27a	5.37673	3.25147	7.50199	2.30726	1.20618	0.41691	0.658948
ENSMUSG00000078821	Gm17414	147.72	89.335	206.106	2.30711	1.20609	7.18145e-11	1.1529e-09
ENSMUSG00000071656	Lrrn4cl	318.027	192.362	443.691	2.30653	1.20573	1.02137e-14	2.32669e-13
ENSMUSG00000037736	Limch1	8315.07	5030.5	11599.7	2.30586	1.20531	6.48496e-33	4.16131e-31
ENSMUSG00000025537	Phkg1	202.078	122.353	281.803	2.30321	1.20364	1.16517e-10	1.82929e-09
ENSMUSG00000015962	1700016C15Rik	1.63595	0.990622	2.28127	2.30287	1.20343	0.645931	0.847547
ENSMUSG00000032257	Ankk1	2.59976	1.57457	3.62495	2.30219	1.20301	0.370616	0.612402
ENSMUSG00000050014	Apol10b	19.8302	12.0126	27.6478	2.30157	1.20262	0.0329365	0.101386
ENSMUSG00000033278	Ptprm	10792.1	6538.83	15045.4	2.30093	1.20222	1.77546e-33	1.1699e-31
ENSMUSG00000054659	Pm20d2	793.959	481.09	1106.83	2.30066	1.20205	5.87513e-21	1.99519e-19
ENSMUSG00000027223	Mapk8ip1	766.59	464.53	1068.65	2.3005	1.20194	6.81932e-21	2.30874e-19
ENSMUSG00000081071	Gm9836	4.51481	2.73609	6.29353	2.30019	1.20175	0.748553	0.912815
ENSMUSG00000031618	Nr3c2	1372.74	831.973	1913.51	2.29997	1.20162	7.2559e-25	3.15911e-23
ENSMUSG00000025324	Atp10a	490.116	297.442	682.789	2.29554	1.19883	2.69081e-17	7.36022e-16
ENSMUSG00000043085	Tmem82	1410.04	855.961	1964.12	2.29464	1.19827	4.50163e-26	2.11874e-24
ENSMUSG00000022265	Ank	10080	6122.53	14037.4	2.29275	1.19708	3.41313e-33	2.21592e-31
ENSMUSG00000071102	Gm10313	1.54638	0.939454	2.15331	2.29208	1.19666	0.512317	0.744006
ENSMUSG00000064587		1.1552	0.701831	1.60858	2.29197	1.19659	0.878814	0.979156
ENSMUSG00000090707	Gm8237	9.92448	6.02954	13.8194	2.29196	1.19658	0.146071	0.322629
ENSMUSG00000022708	Zbtb20	15760.3	9577.98	21942.6	2.29094	1.19594	1.63615e-35	1.19196e-33
ENSMUSG00000093644	Gm19560	1.54553	0.939454	2.1516	2.29027	1.19552	0.410284	0.652635
ENSMUSG00000056203	Tas2r135	8.77247	5.33238	12.2126	2.29026	1.19551	0.163095	0.349327
ENSMUSG00000028488	Sh3gl2	53.6856	32.6383	74.7329	2.28973	1.19518	0.000390727	0.00219519
ENSMUSG00000038807	Rap1gap2	5798.98	3526.03	8071.93	2.28924	1.19487	4.666e-32	2.87702e-30
ENSMUSG00000070999	Ccin	17.4472	10.6134	24.2809	2.28775	1.19393	0.0497879	0.142508
ENSMUSG00000073386	9830107B12Rik	3.28244	1.9968	4.56809	2.28771	1.19391	0.292644	0.524592
ENSMUSG00000091937	Gm3646	280.371	170.583	390.158	2.28721	1.19359	2.43479e-13	4.89931e-12
ENSMUSG00000024340	Btnl2	2.99276	1.82138	4.16413	2.28625	1.19299	0.299574	0.532603
ENSMUSG00000081932	Gm12331	2.50968	1.52791	3.49144	2.2851	1.19226	0.452529	0.692388
ENSMUSG00000032528	Vipr1	47.1965	28.7582	65.6347	2.2823	1.19049	0.000732081	0.00385403
ENSMUSG00000037762	Slc16a9	141.604	86.285	196.923	2.28224	1.19045	3.03185e-08	3.53726e-07
ENSMUSG00000060882	Kcnd2	822.487	501.188	1143.79	2.28215	1.19039	4.79021e-23	1.84536e-21
ENSMUSG00000058743	Kcnj14	43.6436	26.6024	60.6849	2.28118	1.18978	0.00039194	0.00220145
ENSMUSG00000091568	Gm8206	32.8215	20.0061	45.6369	2.28115	1.18976	0.00340424	0.0148099
ENSMUSG00000089718	2310075C17Rik	13.7152	8.3646	19.0658	2.27934	1.18862	0.0303775	0.0950197
ENSMUSG00000022018	1190002H23Rik	1135.46	692.823	1578.1	2.27779	1.18763	7.48819e-24	3.02737e-22
ENSMUSG00000038751	Ptk6	2.79893	1.708	3.88985	2.27742	1.1874	0.556914	0.780627
ENSMUSG00000043541	Casc1	269.568	164.51	374.626	2.27722	1.18727	3.12879e-12	5.71729e-11
ENSMUSG00000085399	9130206I24Rik	197.545	120.595	274.495	2.27617	1.18661	4.6304e-09	5.95291e-08
ENSMUSG00000088106		1.92752	1.17708	2.67797	2.2751	1.18593	0.76292	0.921061
ENSMUSG00000005803	Sqrdl	821.159	501.515	1140.8	2.27471	1.18569	7.27017e-21	2.45385e-19
ENSMUSG00000061991	Hist1h2af	14.8726	9.08367	20.6615	2.27458	1.1856	0.0598588	0.164671
ENSMUSG00000021684	Pde8b	472.823	288.813	656.833	2.27425	1.18539	5.41585e-16	1.36472e-14
ENSMUSG00000091550	Gm6811	4.24933	2.59629	5.90238	2.27339	1.18485	0.468528	0.707456
ENSMUSG00000096727	Psmb9	181.691	111.055	252.327	2.27208	1.18402	7.87241e-09	9.86241e-08
ENSMUSG00000033174	Mgll	15260.3	9328.12	21192.6	2.2719	1.1839	2.26346e-33	1.4826e-31
ENSMUSG00000064622		2.69977	1.65047	3.74907	2.27151	1.18365	0.730385	0.901754
ENSMUSG00000030748	Il4ra	1958.66	1197.52	2719.79	2.27118	1.18344	6.70749e-28	3.46747e-26
ENSMUSG00000085180	AI838599	195.792	119.752	271.833	2.26997	1.18267	2.37528e-11	4.00549e-10
ENSMUSG00000089555	Mir1933	1.45233	0.888286	2.01638	2.26996	1.18267	0.412382	0.654697
ENSMUSG00000087108	Gm16093	12.7753	7.8153	17.7353	2.26931	1.18225	0.019071	0.064845
ENSMUSG00000087480	Gm15910	110.722	67.7566	153.688	2.26824	1.18157	9.49455e-08	1.03908e-06
ENSMUSG00000091844	Gm8251	7.92573	4.85077	11.0007	2.26782	1.18131	0.176878	0.369526
ENSMUSG00000058357	Gm6612	1.64372	1.00617	2.28127	2.26727	1.18096	0.646073	0.847575
ENSMUSG00000005373	Mlxipl	1748.02	1070.35	2425.69	2.26625	1.18031	3.95e-28	2.07108e-26
ENSMUSG00000029685	Asb15	1229.95	753.15	1706.75	2.26615	1.18024	2.24571e-23	8.86796e-22
ENSMUSG00000014158	Trpv4	363.831	222.794	504.868	2.26608	1.1802	1.64379e-14	3.65039e-13
ENSMUSG00000086480	Gm15287	54.2776	33.2409	75.3144	2.26571	1.17997	6.6471e-05	0.000445576
ENSMUSG00000057092	Fxyd3	3.29618	2.01871	4.57364	2.26563	1.17991	0.236853	0.453924
ENSMUSG00000041548	Hspb8	8076.32	4947.41	11205.2	2.26487	1.17943	7.72721e-32	4.71189e-30
ENSMUSG00000036790	Slitrk2	71.8814	44.0399	99.7228	2.26437	1.17911	1.96478e-05	0.000146226
ENSMUSG00000057897	Camk2b	580.143	355.485	804.801	2.26395	1.17884	1.92892e-19	5.94679e-18
ENSMUSG00000033768	Nrxn2	213.54	130.857	296.224	2.26373	1.1787	2.645e-10	3.97182e-09
ENSMUSG00000087678	Gm14120	7.73786	4.74376	10.7319	2.26233	1.17781	0.236665	0.453722
ENSMUSG00000020388	Pdlim4	541.655	332.092	751.218	2.26208	1.17765	3.42976e-16	8.77272e-15
ENSMUSG00000044022	Pcdhb21	167.25	102.588	231.912	2.26063	1.17672	2.63418e-10	3.95827e-09
ENSMUSG00000049044	Rapgef4	847.824	520.114	1175.53	2.26015	1.17642	1.41026e-20	4.68122e-19
ENSMUSG00000087670	9530036M11Rik	1.84107	1.13042	2.55171	2.25731	1.1746	0.75914	0.919186
ENSMUSG00000038172	Ttc39b	1470.3	902.921	2037.68	2.25676	1.17425	2.06744e-25	9.40964e-24
ENSMUSG00000061080	Lsamp	67.0208	41.1767	92.8649	2.25528	1.17331	8.67437e-06	6.9026e-05
ENSMUSG00000078164	Gm4392	137.476	84.5089	190.444	2.25354	1.17219	6.89264e-10	9.95735e-09
ENSMUSG00000094234		9.19467	5.65211	12.7372	2.25353	1.17219	0.24394	0.463283
ENSMUSG00000081319	Gm12936	5.23096	3.21585	7.24606	2.25323	1.172	0.294704	0.527103
ENSMUSG00000044405	Adig	2.61757	1.61018	3.62495	2.25127	1.17074	0.370548	0.612374
ENSMUSG00000020439	Smtn	21078.3	12968.8	29187.9	2.25062	1.17033	7.49456e-32	4.58268e-30
ENSMUSG00000056313	1810011O10Rik	4867.57	2995.06	6740.08	2.2504	1.17018	1.69587e-30	9.7486e-29
ENSMUSG00000088494		1.94396	1.19714	2.69078	2.24767	1.16843	0.395862	0.63937
ENSMUSG00000020090	Npffr1	1.55053	0.955005	2.14605	2.24716	1.1681	0.644277	0.846526
ENSMUSG00000085609	1700016P03Rik	14.9238	9.1989	20.6487	2.2447	1.16652	0.103931	0.251279
ENSMUSG00000022371	Col14a1	10906.8	6724.77	15088.8	2.24376	1.16592	4.52146e-31	2.66863e-29
ENSMUSG00000070873	Lilra5	48.9049	30.1554	67.6545	2.24353	1.16577	0.000753159	0.00395368
ENSMUSG00000085111	Ascl4	1.16298	0.717382	1.60858	2.24228	1.16497	0.879424	0.979365
ENSMUSG00000094050		1.16298	0.717382	1.60858	2.24228	1.16497	0.879424	0.979365
ENSMUSG00000095400		1.16298	0.717382	1.60858	2.24228	1.16497	0.879424	0.979365
ENSMUSG00000067219	Nipal1	3.68232	2.27188	5.09276	2.24165	1.16456	0.485661	0.722436
ENSMUSG00000081730	Gm13785	3.48808	2.15215	4.82402	2.24149	1.16446	0.508909	0.741439
ENSMUSG00000027596	a	3.10139	1.91452	4.28825	2.23985	1.1634	0.782418	0.932111
ENSMUSG00000072589	Gm10371	17.5783	10.8539	24.3027	2.23908	1.16291	0.0285781	0.0904291
ENSMUSG00000074738	B930041F14Rik	7.37278	4.55279	10.1928	2.23879	1.16272	0.244025	0.463397
ENSMUSG00000085837	4933400F03Rik	6.89725	4.25949	9.53502	2.23854	1.16256	0.0926941	0.230446
ENSMUSG00000042333	Tnfrsf14	122.275	75.5339	169.015	2.23761	1.16196	1.28457e-07	1.37315e-06
ENSMUSG00000022340	Sybu	232.715	143.803	321.628	2.23659	1.1613	2.49616e-09	3.31929e-08
ENSMUSG00000084756	Gm13881	17.2794	10.6822	23.8765	2.23518	1.16039	0.113187	0.267962
ENSMUSG00000029074	Ttll10	3.78832	2.34312	5.23353	2.23358	1.15936	0.335461	0.573717
ENSMUSG00000032011	Thy1	1652.71	1022.56	2282.87	2.23251	1.15867	1.55226e-24	6.60202e-23
ENSMUSG00000087936		1.26672	0.784102	1.74935	2.23102	1.1577	0.5341	0.763485
ENSMUSG00000079414	Gm11110	26.3386	16.3133	36.3638	2.22909	1.15645	0.0092454	0.0349817
ENSMUSG00000083374	Gm11449	2.72491	1.68794	3.76188	2.22868	1.15619	0.453544	0.6931
ENSMUSG00000053063	Clec12a	56.6892	35.1165	78.2619	2.22864	1.15616	0.000520836	0.00284085
ENSMUSG00000027339	Rassf2	1579.29	978.398	2180.17	2.22831	1.15595	1.0107e-24	4.34048e-23
ENSMUSG00000031842	Pde4c	401.426	248.745	554.108	2.22762	1.1555	5.64733e-15	1.32054e-13
ENSMUSG00000069792	Gm11428	20.1178	12.4671	27.7685	2.22735	1.15533	0.0306471	0.0957271
ENSMUSG00000035258	Abi3bp	916.698	568.115	1265.28	2.22715	1.1552	8.96099e-22	3.21112e-20
ENSMUSG00000037813	D630003M21Rik	698.874	433.185	964.563	2.22668	1.15489	4.28606e-18	1.23191e-16
ENSMUSG00000000792	Slc5a5	14.2971	8.86345	19.7308	2.22608	1.15451	0.106262	0.255431
ENSMUSG00000031886	Ces2e	82.9181	51.4236	114.413	2.2249	1.15374	2.2096e-06	1.94322e-05
ENSMUSG00000070291	Ddx43	14.6943	9.11478	20.2738	2.22428	1.15334	0.0597994	0.16457
ENSMUSG00000026407	Cacna1s	89.981	55.8158	124.146	2.22422	1.1533	9.16911e-06	7.25704e-05
ENSMUSG00000037904	Ankrd9	1808.69	1121.99	2495.38	2.22407	1.1532	1.02219e-23	4.08766e-22
ENSMUSG00000076580	Igkv8-27	1.26395	0.784102	1.7438	2.22394	1.15312	0.88689	0.982971
ENSMUSG00000083077	Gm14126	1.26395	0.784102	1.7438	2.22394	1.15312	0.88689	0.982971
ENSMUSG00000062087	4930423O20Rik	12.7458	7.90861	17.583	2.22328	1.15269	0.104976	0.253009
ENSMUSG00000060647	Gm7099	2.53748	1.57457	3.5004	2.22309	1.15257	0.452682	0.692433
ENSMUSG00000077667		2.52705	1.5682	3.48589	2.22285	1.15241	0.585271	0.80219
ENSMUSG00000054728	Phactr1	968.23	600.912	1335.55	2.22254	1.15221	7.31813e-23	2.78039e-21
ENSMUSG00000005057	Sh2b2	106.238	65.9377	146.539	2.22238	1.15211	2.54868e-06	2.21756e-05
ENSMUSG00000081104	Gm15989	4.18258	2.59629	5.76886	2.22196	1.15184	0.559276	0.782448
ENSMUSG00000084299	Gm6630	1.2631	0.784102	1.74209	2.22177	1.15171	0.683714	0.87257
ENSMUSG00000033196	Myh2	1.46322	0.908351	2.01808	2.2217	1.15166	0.512693	0.744188
ENSMUSG00000085685	Gm15253	1.75247	1.08844	2.41649	2.22013	1.15065	0.647926	0.848109
ENSMUSG00000089762	Ier5l	513.429	318.902	707.956	2.21998	1.15055	6.10791e-16	1.53037e-14
ENSMUSG00000047910	Pcdhb16	269.089	167.296	370.882	2.21692	1.14856	2.77142e-13	5.56148e-12
ENSMUSG00000039774	Galnt12	83.3118	51.7972	114.826	2.21684	1.14851	8.12708e-06	6.47643e-05
ENSMUSG00000052105	1110012J17Rik	491.381	305.541	677.221	2.21647	1.14826	1.41275e-17	3.94132e-16
ENSMUSG00000089255	Snora78	4.7808	2.97371	6.58788	2.21537	1.14755	0.25474	0.477278
ENSMUSG00000083015	Gm16518	1.94896	1.21269	2.68523	2.21427	1.14683	0.611736	0.822901
ENSMUSG00000044814	Olfr543	13.2445	8.24389	18.245	2.21316	1.14611	0.0859741	0.217612
ENSMUSG00000044667	D3Bwg0562e	55.8347	34.7575	76.9118	2.21282	1.14588	0.0002099	0.0012649
ENSMUSG00000081427	Gm12382	2.14042	1.33243	2.94841	2.21281	1.14588	0.875749	0.977216
ENSMUSG00000080665	Mir1199	3.01789	1.87891	4.15688	2.21239	1.14561	0.43598	0.676972
ENSMUSG00000096191		4.09442	2.54964	5.63919	2.21176	1.1452	0.389593	0.632716
ENSMUSG00000038192	Cer1	1.06978	0.666214	1.47335	2.21153	1.14505	0.871754	0.975692
ENSMUSG00000086438	2510003D18Rik	1.06978	0.666214	1.47335	2.21153	1.14505	0.871754	0.975692
ENSMUSG00000042379	Esm1	105.67	65.8154	145.525	2.21111	1.14477	3.03519e-07	3.05094e-06
ENSMUSG00000030523	Trpm1	3.69417	2.30114	5.08721	2.21074	1.14453	0.619147	0.829211
ENSMUSG00000056436	Cyct	15.2305	9.48753	20.9734	2.21063	1.14446	0.0642268	0.173956
ENSMUSG00000050103	Agmo	74.4641	46.3978	102.53	2.20981	1.14393	4.94422e-05	0.000341059
ENSMUSG00000024558	Mapk4	302.903	188.747	417.06	2.20962	1.1438	4.88753e-14	1.04239e-12
ENSMUSG00000055809	6030429G01Rik	259.763	161.878	357.648	2.20937	1.14363	1.65329e-12	3.09278e-11
ENSMUSG00000063889	Crem	1631.91	1016.99	2246.84	2.20931	1.1436	3.85408e-24	1.59615e-22
ENSMUSG00000046318	Ccbe1	224.117	139.702	308.533	2.2085	1.14307	3.48843e-11	5.77671e-10
ENSMUSG00000049477	Gm8508	1.65608	1.0326	2.27956	2.20759	1.14247	0.60557	0.818376
ENSMUSG00000069917	Hba-a2	7810.8	4870.88	10750.7	2.20714	1.14218	1.18289e-36	9.32542e-35
ENSMUSG00000026890	Lhx6	750.344	468.097	1032.59	2.20593	1.14139	5.34772e-20	1.72078e-18
ENSMUSG00000087530	Gm15533	10.1499	6.33404	13.9658	2.20487	1.1407	0.0780501	0.202477
ENSMUSG00000049538	Adamts16	45.1677	28.1878	62.1476	2.20477	1.14063	0.000586878	0.00315661
ENSMUSG00000083502	Gm14861	9.95224	6.21132	13.6932	2.20455	1.14049	0.184046	0.379863
ENSMUSG00000079941	Gm11273	102.884	64.2251	141.543	2.20386	1.14003	2.6147e-05	0.000189671
ENSMUSG00000042751	Nmnat2	109.657	68.4795	150.835	2.20263	1.13922	2.85411e-06	2.45908e-05
ENSMUSG00000094872		2.04822	1.27941	2.81704	2.20182	1.1387	0.394486	0.637799
ENSMUSG00000082855	Gm14537	1.85854	1.16153	2.55556	2.20017	1.13762	0.39697	0.64055
ENSMUSG00000029126	Nsg1	762.876	476.802	1048.95	2.19997	1.13748	9.49672e-18	2.67045e-16
ENSMUSG00000048473	Gm766	4.59071	2.86953	6.31189	2.19962	1.13726	0.314489	0.550037
ENSMUSG00000091275	Gm3248	54.9792	34.3847	75.5737	2.19789	1.13612	0.000219419	0.0013183
ENSMUSG00000025927	Tfap2b	2.44292	1.52791	3.35792	2.19772	1.13601	0.55118	0.776536
ENSMUSG00000031298	Gpr64	123.099	77.0467	169.151	2.19543	1.1345	1.07911e-07	1.16766e-06
ENSMUSG00000039546	Ajap1	14.6639	9.17981	20.148	2.19481	1.1341	0.0210893	0.0705663
ENSMUSG00000037224	Zfyve28	99.0354	62.009	136.062	2.19423	1.13371	2.38679e-05	0.000175095
ENSMUSG00000090363	Gm3512	22.2475	13.9299	30.5651	2.1942	1.1337	0.0949464	0.234697
ENSMUSG00000086767	Gm13070	4.88732	3.0605	6.71414	2.19381	1.13344	0.254747	0.477278
ENSMUSG00000060559	Gm10083	56.9522	35.6796	78.2248	2.19243	1.13253	0.000416577	0.00232504
ENSMUSG00000091618	H60c	8.59748	5.38806	11.8069	2.19131	1.13179	0.162891	0.349094
ENSMUSG00000050321	Neto1	1.36725	0.857183	1.87731	2.19009	1.13099	0.804694	0.943475
ENSMUSG00000037447	Arid5a	1992.11	1249.06	2735.17	2.18978	1.13079	1.24902e-25	5.76799e-24
ENSMUSG00000045912	C2cd4c	2.64175	1.65684	3.62666	2.18891	1.13021	0.453195	0.692796
ENSMUSG00000054999	Naaladl1	103.167	64.715	141.62	2.18836	1.12985	3.26349e-06	2.78355e-05
ENSMUSG00000091078	Gm17218	2.04948	1.28577	2.81319	2.18794	1.12957	0.869998	0.974822
ENSMUSG00000024107	Lhcgr	1.2745	0.799653	1.74935	2.18763	1.12937	0.533977	0.763407
ENSMUSG00000023277	Twf2	5326.41	3342.66	7310.17	2.18693	1.12891	2.31161e-28	1.22073e-26
ENSMUSG00000029570	Lfng	702.644	440.988	964.301	2.18668	1.12874	2.9472e-18	8.56007e-17
ENSMUSG00000059309	Hist1h3f	4.30923	2.70499	5.91348	2.18614	1.12839	0.262374	0.487142
ENSMUSG00000041120	Nbl1	1134.96	712.581	1557.33	2.18548	1.12795	2.39919e-21	8.37972e-20
ENSMUSG00000093312		1.95588	1.22824	2.68352	2.18484	1.12753	0.49119	0.727101
ENSMUSG00000054320	Lrrc36	93.6261	58.8092	128.443	2.18406	1.12701	3.05151e-06	2.6169e-05
ENSMUSG00000061132	Blnk	44.1457	27.7311	60.5603	2.18384	1.12687	0.000636	0.00339764
ENSMUSG00000060002	Chpt1	14561.2	9147.22	19975.2	2.18375	1.12681	3.27264e-32	2.03494e-30
ENSMUSG00000053062	Jam2	7143.28	4488.45	9798.11	2.18296	1.12629	1.04312e-28	5.57526e-27
ENSMUSG00000050663	Trhde	40.735	25.5959	55.8741	2.18293	1.12627	0.000398021	0.00223276
ENSMUSG00000016262	Sertad4	1439.63	904.624	1974.64	2.18283	1.1262	3.40194e-23	1.32676e-21
ENSMUSG00000021880	Rnase6	21.9136	13.7718	30.0554	2.18239	1.12591	0.0369028	0.11139
ENSMUSG00000037370	Enpp1	570.249	358.453	782.045	2.18172	1.12547	1.16367e-17	3.25976e-16
ENSMUSG00000052117	D630039A03Rik	45.8733	28.8478	62.8987	2.18036	1.12457	0.00295809	0.0131118
ENSMUSG00000084696		3.82305	2.40532	5.24079	2.17883	1.12355	0.277782	0.506214
ENSMUSG00000052629	Gm9885	5.76742	3.62889	7.90595	2.17861	1.12341	0.450972	0.691015
ENSMUSG00000019989	Enpp3	703.901	442.982	964.82	2.17801	1.12301	3.81999e-18	1.10225e-16
ENSMUSG00000082684	Gm12774	2.2542	1.41921	3.08919	2.17669	1.12214	0.581032	0.798874
ENSMUSG00000085976	Gm13816	10.4961	6.61179	14.3804	2.17496	1.12099	0.0894688	0.224297
ENSMUSG00000028360	Slc44a5	96.6327	60.8749	132.391	2.1748	1.12088	1.01044e-06	9.36767e-06
ENSMUSG00000028017	Egf	456.213	287.42	625.006	2.17454	1.12071	6.91884e-14	1.4615e-12
ENSMUSG00000056529	Ptafr	118.82	74.9219	162.717	2.17183	1.11891	8.25157e-07	7.74756e-06
ENSMUSG00000081991	Gm13859	2.25057	1.41921	3.08193	2.17158	1.11874	0.716332	0.893254
ENSMUSG00000096147		0.982475	0.619561	1.34539	2.17152	1.11871	0.676561	0.867976
ENSMUSG00000040852	Plekhh2	1745.41	1100.92	2389.9	2.17082	1.11824	6.79133e-24	2.7659e-22
ENSMUSG00000054459	Vsnl1	4.90116	3.0916	6.71073	2.17063	1.11811	0.177736	0.370897
ENSMUSG00000025083	Afap1l2	1229.74	775.9	1683.58	2.16984	1.11759	3.97317e-22	1.44965e-20
ENSMUSG00000044997	E130304I02Rik	0.981622	0.619561	1.34368	2.16877	1.11688	0.538333	0.766705
ENSMUSG00000085051	Gm11542	5.19075	3.27621	7.10529	2.16875	1.11687	0.364727	0.605883
ENSMUSG00000028602	Tnfrsf8	19.6067	12.3773	26.8361	2.16817	1.11648	0.0652533	0.176206
ENSMUSG00000088473		1.56919	0.990622	2.14776	2.16809	1.11642	0.816597	0.949414
ENSMUSG00000025885	Myo5b	1151.29	726.956	1575.62	2.16742	1.11598	3.57522e-20	1.164e-18
ENSMUSG00000024078	Ttc27	2007.34	1267.51	2747.17	2.16737	1.11594	2.96291e-24	1.23402e-22
ENSMUSG00000084537		1.37184	0.866372	1.87731	2.16686	1.11561	0.685721	0.873554
ENSMUSG00000091041	Gm17720	12.853	8.12133	17.5847	2.16525	1.11454	0.167976	0.356563
ENSMUSG00000001642	Akr1b3	3820.27	2414.32	5226.22	2.16468	1.11415	5.33301e-24	2.18812e-22
ENSMUSG00000052688	5430435G22Rik	297.374	187.937	406.811	2.16461	1.11411	1.56406e-11	2.69306e-10
ENSMUSG00000083100	Gm6044	3.73212	2.35867	5.10556	2.1646	1.1141	0.278044	0.506576
ENSMUSG00000034156	Bzrap1	12.9478	8.18636	17.7093	2.16327	1.11321	0.118195	0.276498
ENSMUSG00000081885	Gm13231	3.72934	2.35867	5.10001	2.16224	1.11253	0.404182	0.647453
ENSMUSG00000062007	Hsh2d	5.00339	3.16468	6.8421	2.16202	1.11238	0.348846	0.588479
ENSMUSG00000087538	Gm16341	1.86077	1.17708	2.54446	2.16167	1.11215	0.948007	1
ENSMUSG00000087694	A530058N18Rik	1.56556	0.990622	2.1405	2.16076	1.11154	1	1
ENSMUSG00000024206	Rfx2	1017.51	644.069	1390.96	2.15964	1.11079	1.08762e-21	3.88548e-20
ENSMUSG00000022215	Fitm1	4843.92	3066.28	6621.57	2.15948	1.11068	8.52094e-27	4.15212e-25
ENSMUSG00000044072	Eml6	504.992	319.708	690.277	2.15909	1.11042	2.25991e-14	4.95385e-13
ENSMUSG00000083183	Gm15575	6.29241	3.9844	8.60042	2.15852	1.11004	0.226659	0.441422
ENSMUSG00000060716	Plekhh1	3639.12	2304.38	4973.85	2.15843	1.10998	1.36681e-26	6.61645e-25
ENSMUSG00000062760	1810041L15Rik	24.4456	15.4813	33.4099	2.15808	1.10975	0.0289278	0.0912086
ENSMUSG00000086103	Gm11832	40.9399	25.9315	55.9483	2.15754	1.10939	0.00657047	0.0261988
ENSMUSG00000060034	Ctf2	14.449	9.15224	19.7457	2.15747	1.10934	0.043375	0.127035
ENSMUSG00000015501	Hivep2	5418	3432.39	7403.61	2.15699	1.10902	5.62588e-28	2.92891e-26
ENSMUSG00000049493	Pls1	13.3631	8.47048	18.2557	2.15522	1.10783	0.111631	0.264991
ENSMUSG00000027820	Mme	348.28	220.809	475.751	2.15458	1.10741	4.13325e-15	9.77893e-14
ENSMUSG00000023064	Sncg	45.0217	28.5664	61.477	2.15208	1.10573	0.000360303	0.00204298
ENSMUSG00000080870	Gm14111	8.14858	5.17235	11.1248	2.15082	1.10489	0.462811	0.70212
ENSMUSG00000030762	Aqp8	67.4185	42.8047	92.0323	2.15005	1.10437	3.71601e-05	0.000262571
ENSMUSG00000001334	Fndc5	12680.2	8052.85	17307.6	2.14925	1.10383	1.93917e-27	9.79526e-26
ENSMUSG00000048706	D4Bwg0951e	256.578	163	350.156	2.1482	1.10313	2.06962e-08	2.47748e-07
ENSMUSG00000075596	B130006D01Rik	2.55859	1.62573	3.49144	2.14761	1.10273	0.452793	0.692491
ENSMUSG00000039639	Kcne1	21886.6	13909.8	29863.4	2.14693	1.10228	6.23471e-28	3.23063e-26
ENSMUSG00000067158	Col4a4	448.637	285.206	612.068	2.14606	1.10169	1.70697e-14	3.77931e-13
ENSMUSG00000096629	Gm3383	48.6775	30.947	66.4081	2.14587	1.10156	0.00226644	0.0104076
ENSMUSG00000025270	Alas2	1818.6	1156.53	2480.68	2.14493	1.10093	6.41785e-26	3.0078e-24
ENSMUSG00000086735	Gm13977	1.67249	1.0637	2.28127	2.14465	1.10074	0.750992	0.914312
ENSMUSG00000024338	Psmb8	374.658	238.415	510.901	2.1429	1.09957	2.05291e-12	3.80168e-11
ENSMUSG00000025185	Loxl4	132.39	84.2509	180.529	2.14276	1.09947	2.65504e-07	2.69542e-06
ENSMUSG00000083237	Gm11698	1.47599	0.939454	2.01253	2.14224	1.09912	0.811378	0.946969
ENSMUSG00000048617	Rtbdn	21.3846	13.6117	29.1575	2.14208	1.09902	0.0244439	0.0795364
ENSMUSG00000071414	Gm6736	286.344	182.299	390.39	2.14149	1.09861	1.51193e-10	2.34699e-09
ENSMUSG00000004655	Aqp1	12278.8	7817.3	16740.3	2.14144	1.09858	1.76148e-26	8.4897e-25
ENSMUSG00000042340	Ctf1	188.809	120.209	257.41	2.14137	1.09853	2.30704e-08	2.73646e-07
ENSMUSG00000031230	Fgf16	740.073	471.249	1008.9	2.1409	1.09822	1.51925e-16	3.95005e-15
ENSMUSG00000094248	Hist1h2ao	3.14571	2.00316	4.28825	2.14075	1.09811	0.869843	0.974805
ENSMUSG00000073674	Gm6644	1348.87	859.081	1838.66	2.14026	1.09779	4.92254e-21	1.67685e-19
ENSMUSG00000089281	Scarna6	6.59668	4.2018	8.99157	2.13993	1.09757	0.399562	0.643368
ENSMUSG00000029275	Gfi1	11.5258	7.34755	15.704	2.13731	1.0958	0.0874643	0.220323
ENSMUSG00000084956	Gm16194	3.45609	2.20332	4.70886	2.13717	1.0957	0.235651	0.452612
ENSMUSG00000018830	Myh11	3617.3	2307.32	4927.28	2.1355	1.09457	5.56466e-24	2.27051e-22
ENSMUSG00000021699	Pde4d	3577.04	2281.82	4872.26	2.13525	1.0944	1.61035e-26	7.77831e-25
ENSMUSG00000071613	Gm10340	2.16793	1.3836	2.95226	2.13376	1.0934	0.471194	0.709587
ENSMUSG00000054252	Fgfr3	1214.66	775.698	1653.62	2.13178	1.09206	1.38074e-20	4.59707e-19
ENSMUSG00000065452	Mir207	1.76983	1.13042	2.40923	2.13127	1.09171	0.941069	1
ENSMUSG00000045868	Gvin1	225.296	143.91	306.683	2.13108	1.09158	3.78193e-11	6.244e-10
ENSMUSG00000002204	Napsa	41.8443	26.7579	56.9307	2.12762	1.08924	0.000577027	0.00310934
ENSMUSG00000093604		1.57334	1.00617	2.1405	2.12736	1.08907	1	1
ENSMUSG00000036095	Dgkb	85.7553	54.8459	116.665	2.12714	1.08891	1.03848e-05	8.13461e-05
ENSMUSG00000038463	Olfml2b	5366.98	3433.36	7300.59	2.12637	1.08839	3.84331e-27	1.90218e-25
ENSMUSG00000090691	Gm3667	43.0808	27.5647	58.5969	2.12579	1.088	0.000331924	0.00189676
ENSMUSG00000036381	P2ry14	215.61	138.014	293.206	2.12446	1.0871	2.14534e-10	3.27272e-09
ENSMUSG00000096112		2.77108	1.77472	3.76743	2.12283	1.08599	0.301825	0.535355
ENSMUSG00000072875	Gpr27	105.328	67.4733	143.182	2.12205	1.08546	5.88843e-06	4.80344e-05
ENSMUSG00000022766	Serpind1	30.1204	19.2961	40.9447	2.12192	1.08537	0.00553706	0.0225799
ENSMUSG00000058932	Gm2174	4.14876	2.65833	5.63919	2.12133	1.08497	0.44459	0.684795
ENSMUSG00000088108	Snora47	14.0394	8.99689	19.082	2.12095	1.08471	0.051394	0.1458
ENSMUSG00000050350	Gpr18	6.32129	4.05112	8.59145	2.12076	1.08458	0.226706	0.441422
ENSMUSG00000074232	Gm10647	21.1472	13.5589	28.7356	2.11932	1.0836	0.0223202	0.0739119
ENSMUSG00000088151		9.1819	5.88805	12.4757	2.11883	1.08326	0.217318	0.428732
ENSMUSG00000082900	Gm11557	0.990251	0.635112	1.34539	2.11835	1.08294	0.676809	0.868192
ENSMUSG00000026235	Epha4	2061.24	1323.53	2798.94	2.11475	1.08049	6.26104e-23	2.39111e-21
ENSMUSG00000043943	Naalad2	2045.2	1313.73	2776.67	2.11358	1.07969	8.32104e-24	3.3518e-22
ENSMUSG00000089959	Gm16268	5.93651	3.8135	8.05953	2.11342	1.07958	0.196646	0.398712
ENSMUSG00000081277	Gm15285	1.3828	0.888286	1.87731	2.11341	1.07957	0.805692	0.943937
ENSMUSG00000003051	Elf3	48.7399	31.3132	66.1667	2.11306	1.07933	0.00187406	0.00886203
ENSMUSG00000052957	Gas1	4508.31	2896.54	6120.07	2.11289	1.07922	7.3251e-25	3.18296e-23
ENSMUSG00000019232	Agxt2l1	5.72263	3.67837	7.76688	2.1115	1.07827	0.588104	0.804874
ENSMUSG00000089941	Gm16168	19.2025	12.3509	26.0542	2.10951	1.0769	0.0164029	0.0570291
ENSMUSG00000051728	4930563D23Rik	44.8927	28.8809	60.9045	2.10881	1.07643	0.00257923	0.0116287
ENSMUSG00000034329	Brip1	677.443	435.849	919.037	2.10861	1.07629	5.23159e-18	1.49782e-16
ENSMUSG00000080645	Mir1198	8.10196	5.21433	10.9896	2.10757	1.07558	0.504125	0.737605
ENSMUSG00000040938	Slc16a11	131.798	84.8267	178.77	2.10747	1.07551	2.21599e-08	2.64124e-07
ENSMUSG00000089621		1.09037	0.701831	1.4789	2.10721	1.07533	0.536813	0.76533
ENSMUSG00000040289	Hey1	1357.25	873.818	1840.68	2.10649	1.07484	1.44756e-20	4.79782e-19
ENSMUSG00000091492	Gm17025	1.58666	1.02172	2.1516	2.10585	1.0744	0.409361	0.651614
ENSMUSG00000047330	Kcne4	414.423	266.899	561.946	2.10546	1.07414	3.57373e-13	7.1133e-12
ENSMUSG00000010841	1700006E09Rik	23.6507	15.2331	32.0683	2.10517	1.07394	0.0215301	0.0717607
ENSMUSG00000029925	Tbxas1	115.664	74.5174	156.811	2.10435	1.07338	7.54077e-07	7.12259e-06
ENSMUSG00000082310	Gm12904	0.792904	0.510862	1.07495	2.10418	1.07326	0.562982	0.784747
ENSMUSG00000087100	Gm14641	0.792904	0.510862	1.07495	2.10418	1.07326	0.562982	0.784747
ENSMUSG00000029392	Rilpl1	6686.09	4309.12	9063.07	2.10323	1.07261	2.01264e-26	9.65804e-25
ENSMUSG00000037318	Traf3ip3	80.1184	51.6631	108.574	2.10157	1.07147	0.000115169	0.000731583
ENSMUSG00000021130	Galntl1	1618.02	1043.37	2192.67	2.10152	1.07143	1.08625e-20	3.63852e-19
ENSMUSG00000070639	Lrrc8b	1104.7	712.385	1497.01	2.1014	1.07135	7.16304e-21	2.42139e-19
ENSMUSG00000028445	Enho	199.212	128.489	269.934	2.10084	1.07096	5.50753e-09	7.0071e-08
ENSMUSG00000031351	Zfp185	245.042	158.061	332.024	2.10061	1.0708	5.75883e-10	8.37973e-09
ENSMUSG00000086213	A330040F15Rik	17.8322	11.5045	24.1598	2.10002	1.0704	0.0937378	0.232465
ENSMUSG00000084583		1.08759	0.701831	1.47335	2.0993	1.06991	0.873284	0.9764
ENSMUSG00000040855	Reps2	122.63	79.1406	166.119	2.09904	1.06973	9.10359e-07	8.48617e-06
ENSMUSG00000000120	Ngfr	285.907	184.565	387.25	2.09818	1.06914	8.92408e-12	1.56715e-10
ENSMUSG00000091191	Gm17334	17.0559	11.0121	23.0998	2.09768	1.0688	0.0391188	0.116975
ENSMUSG00000024134	Six2	14.9709	9.66762	20.2742	2.09713	1.06841	0.0415132	0.122639
ENSMUSG00000031337	Mtm1	1625.67	1049.8	2201.54	2.09709	1.06839	2.30423e-23	9.08279e-22
ENSMUSG00000036390	Gadd45a	423.003	273.164	572.843	2.09706	1.06837	1.86481e-12	3.46789e-11
ENSMUSG00000053898	Ech1	43076.5	27817.7	58335.3	2.09706	1.06837	4.63684e-27	2.27453e-25
ENSMUSG00000053081	1700069B07Rik	5.16108	3.33374	6.98843	2.09627	1.06783	0.173853	0.365837
ENSMUSG00000033207	Mamdc2	377.458	243.837	511.079	2.09599	1.06763	1.01126e-12	1.91939e-11
ENSMUSG00000053004	Hrh1	3.86685	2.49847	5.23524	2.09538	1.06721	0.463792	0.702879
ENSMUSG00000023391	Dlx2	0.893875	0.577582	1.21017	2.09523	1.06711	0.558929	0.782152
ENSMUSG00000085199	Gm15346	0.893875	0.577582	1.21017	2.09523	1.06711	0.558929	0.782152
ENSMUSG00000023000	Dhh	160.312	103.641	216.984	2.09361	1.06599	1.22667e-07	1.31508e-06
ENSMUSG00000027777	Schip1	6048.73	3911.15	8186.32	2.09307	1.06562	2.62446e-25	1.18957e-23
ENSMUSG00000026109	Tmeff2	49.3857	31.9376	66.8338	2.09264	1.06532	0.00208453	0.00969733
ENSMUSG00000090107	Gm11492	3.27278	2.11653	4.42903	2.09259	1.06529	0.609798	0.821481
ENSMUSG00000036432	Siah2	1346.93	871.233	1822.63	2.09202	1.06489	2.72478e-21	9.50185e-20
ENSMUSG00000024219	Anks1	9358.84	6053.94	12663.7	2.09182	1.06476	1.31073e-27	6.66662e-26
ENSMUSG00000067724	Gbx1	8.04676	5.20628	10.8872	2.09117	1.06431	0.123656	0.285431
ENSMUSG00000027463	Slc52a3	100.09	64.7745	135.405	2.09041	1.06379	1.48453e-05	0.000112765
ENSMUSG00000022032	Scara5	922.855	597.488	1248.22	2.08912	1.06289	4.5465e-19	1.37667e-17
ENSMUSG00000091694	Apol11b	9.53149	6.17217	12.8908	2.08854	1.06249	0.12843	0.294174
ENSMUSG00000030708	Dnajb13	37.9072	24.5563	51.2582	2.08738	1.06169	0.00628837	0.0252289
ENSMUSG00000044017	Gpr133	734.544	475.907	993.182	2.08693	1.06138	6.35216e-18	1.80693e-16
ENSMUSG00000082515	Gm12902	13.903	9.01059	18.7953	2.08591	1.06068	0.0525936	0.148478
ENSMUSG00000076608	Igkj5	1.7822	1.15516	2.40923	2.08562	1.06048	0.827074	0.954257
ENSMUSG00000093910		26.2938	17.0463	35.5414	2.08499	1.06004	0.0223238	0.0739126
ENSMUSG00000065360		2.08562	1.35249	2.81874	2.08411	1.05943	0.577858	0.796083
ENSMUSG00000024140	Epas1	20103.5	13038.1	27168.9	2.0838	1.05922	1.0029e-27	5.11273e-26
ENSMUSG00000044430	Klk12	1.79093	1.16153	2.42034	2.08376	1.05919	0.397828	0.64165
ENSMUSG00000032243	Itga11	67.0287	43.4809	90.5764	2.08313	1.05875	9.71452e-05	0.00062738
ENSMUSG00000033066	Gas7	1854.87	1203.51	2506.22	2.08242	1.05826	5.03414e-22	1.82769e-20
ENSMUSG00000032860	P2ry2	1338.8	868.729	1808.87	2.0822	1.05811	3.52595e-20	1.14966e-18
ENSMUSG00000044337	Cxcr7	4007.96	2602.13	5413.78	2.08051	1.05694	2.10274e-24	8.84111e-23
ENSMUSG00000000753	Serpinf1	1043.86	677.722	1410	2.0805	1.05693	3.2854e-18	9.52982e-17
ENSMUSG00000082911	Gm14119	2.08284	1.35249	2.81319	2.08	1.05659	0.872146	0.975886
ENSMUSG00000026601	9430070O13Rik	11.8272	7.68001	15.9744	2.08	1.05659	0.143292	0.318404
ENSMUSG00000045094	Arhgef37	216.477	140.632	292.321	2.07863	1.05563	2.55754e-10	3.85096e-09
ENSMUSG00000088705		8.35025	5.42553	11.275	2.07813	1.05529	0.183971	0.379772
ENSMUSG00000043313	Pcdhb19	325.849	211.731	439.967	2.07796	1.05516	1.05244e-12	1.99413e-11
ENSMUSG00000093169	Mir3079	4.36677	2.83843	5.89512	2.0769	1.05443	0.630406	0.837179
ENSMUSG00000041112	Elmo1	2449.12	1592.02	3306.23	2.07675	1.05433	1.79834e-22	6.69419e-21
ENSMUSG00000085933	Tmem61	1.29464	0.841632	1.74764	2.07649	1.05415	0.51316	0.744517
ENSMUSG00000085078	C030013C21Rik	6.0658	3.94411	8.18749	2.07588	1.05372	0.301747	0.535279
ENSMUSG00000005873	Reep5	22180.1	14424.7	29935.4	2.07528	1.05331	6.64237e-26	3.10643e-24
ENSMUSG00000032021	Crtam	5.96802	3.88207	8.05398	2.07466	1.05288	0.3139	0.549444
ENSMUSG00000023249	Parp3	980.213	637.612	1322.81	2.07464	1.05286	4.64235e-18	1.33085e-16
ENSMUSG00000026043	Col3a1	169358	110175	228540	2.07433	1.05265	8.61901e-26	4.00539e-24
ENSMUSG00000088622		2.28393	1.48593	3.08193	2.07407	1.05246	0.717516	0.89412
ENSMUSG00000063873	Slc24a3	285.103	185.508	384.698	2.07375	1.05224	1.86699e-11	3.17994e-10
ENSMUSG00000059179	Gm8991	5.37672	3.50013	7.25332	2.0723	1.05123	0.284698	0.514801
ENSMUSG00000087110	Gm11264	39.9078	25.9873	53.8283	2.07133	1.05056	0.00280208	0.0125195
ENSMUSG00000035686	Thrsp	181.153	118.005	244.301	2.07025	1.04981	3.41305e-08	3.95276e-07
ENSMUSG00000087632	Gm6058	1.29186	0.841632	1.74209	2.0699	1.04956	0.79963	0.940134
ENSMUSG00000050709	4932442E05Rik	249.187	162.389	335.986	2.06902	1.04895	5.74589e-11	9.29192e-10
ENSMUSG00000033594	Spata2l	530.312	345.716	714.909	2.06791	1.04817	1.03131e-15	2.53792e-14
ENSMUSG00000029707	Fscn3	0.998026	0.650663	1.34539	2.06772	1.04804	0.677054	0.868257
ENSMUSG00000091876	Gm3851	3.19005	2.08075	4.29935	2.06625	1.04701	0.478168	0.716181
ENSMUSG00000027834	Serpini1	762.317	497.332	1027.3	2.06563	1.04658	2.12251e-17	5.84923e-16
ENSMUSG00000048450	Msx1	328.759	214.501	443.017	2.06533	1.04638	3.19106e-11	5.30818e-10
ENSMUSG00000085730	Gm13307	2.28711	1.4923	3.08193	2.06523	1.0463	0.808976	0.945791
ENSMUSG00000053541	Gm4759	5.97976	3.90213	8.05739	2.06487	1.04605	0.431947	0.673219
ENSMUSG00000032271	Nnmt	377.088	246.133	508.043	2.06411	1.04552	2.44909e-12	4.50886e-11
ENSMUSG00000035104	Fam176a	439.559	286.915	592.203	2.06403	1.04547	1.89503e-14	4.18728e-13
ENSMUSG00000003974	Grm3	7.17214	4.68172	9.66255	2.06389	1.04537	0.284878	0.514937
ENSMUSG00000094393		2.78992	1.82138	3.75847	2.06353	1.04511	0.301635	0.535147
ENSMUSG00000084701	n-R5s87	1.99328	1.30133	2.68523	2.06346	1.04506	0.706248	0.887191
ENSMUSG00000035735	Dagla	613.512	400.601	826.424	2.06296	1.04472	4.56053e-16	1.15314e-14
ENSMUSG00000078926	Cdc20b	4.87714	3.18475	6.56952	2.06281	1.04461	0.668931	0.862741
ENSMUSG00000086216	Gm13610	4.07794	2.66301	5.49287	2.06266	1.0445	0.785927	0.933521
ENSMUSG00000085786	Gm15987	6.77456	4.42403	9.12508	2.06262	1.04448	0.344226	0.583687
ENSMUSG00000069919	Hba-a1	11056.2	7220.17	14892.2	2.06258	1.04445	4.39036e-33	2.83371e-31
ENSMUSG00000086998	Gm16033	11.9663	7.8153	16.1174	2.06228	1.04424	0.066692	0.178942
ENSMUSG00000087003	1700067G03Rik	1.69944	1.11036	2.28853	2.06107	1.0434	0.606612	0.819257
ENSMUSG00000072768	Gm10418	2.4882	1.62573	3.35067	2.06102	1.04336	0.673286	0.865865
ENSMUSG00000082273	Gm14801	4.67668	3.05598	6.29737	2.06067	1.04311	0.50891	0.741439
ENSMUSG00000031397	Tktl1	11.1804	7.30726	15.0535	2.06007	1.0427	0.0387644	0.116088
ENSMUSG00000090370	Gm20533	13.8515	9.05442	18.6486	2.05961	1.04237	0.227982	0.443
ENSMUSG00000087319	Gm15907	3.58442	2.34312	4.82573	2.05953	1.04232	0.693442	0.878644
ENSMUSG00000004098	Col5a3	3292.09	2152.29	4431.89	2.05915	1.04205	5.29356e-23	2.02865e-21
ENSMUSG00000088131		1.19911	0.784102	1.61413	2.05857	1.04164	0.535164	0.764263
ENSMUSG00000087082	Gm15423	2.9849	1.95199	4.01781	2.05832	1.04146	0.861292	0.969711
ENSMUSG00000093465	Gm20682	3.39263	2.21887	4.56638	2.05798	1.04123	0.286106	0.516478
ENSMUSG00000024211	Grm8	4.98832	3.2625	6.71414	2.05797	1.04122	0.293896	0.52611
ENSMUSG00000063060	Sox7	4783.56	3129.81	6437.3	2.05677	1.04038	1.62259e-24	6.87468e-23
ENSMUSG00000001508	Sgca	4212.74	2756.88	5668.6	2.05617	1.03996	4.49643e-23	1.73825e-21
ENSMUSG00000020577	Tspan13	4955.61	3244.63	6666.6	2.05466	1.0389	4.92008e-24	2.02623e-22
ENSMUSG00000085750	Gm14009	12.3697	8.09957	16.6399	2.05441	1.03873	0.155679	0.337736
ENSMUSG00000064646		1.09537	0.717382	1.47335	2.05379	1.03829	0.873942	0.976638
ENSMUSG00000025780	Itih5	6093.62	3991.96	8195.29	2.05295	1.0377	7.11994e-25	3.10604e-23
ENSMUSG00000087249	Gm16062	68.2208	44.6994	91.7422	2.05243	1.03733	0.00157689	0.00761667
ENSMUSG00000023903	Mmp25	97.6229	63.9707	131.275	2.05211	1.03711	4.40703e-05	0.000306493
ENSMUSG00000070643	Sox13	2980.51	1953.26	4007.75	2.05182	1.03691	1.28804e-21	4.57111e-20
ENSMUSG00000051209	Gpr119	1.19634	0.784102	1.60858	2.05149	1.03667	0.88198	0.980798
ENSMUSG00000065541	Mir24-2	78.7741	51.6496	105.899	2.05033	1.03586	4.12388e-05	0.000288256
ENSMUSG00000033467	Crlf2	576.14	377.918	774.363	2.04902	1.03494	6.24194e-15	1.45036e-13
ENSMUSG00000085958	A930019D19Rik	13.285	8.71446	17.8556	2.04896	1.03489	0.104511	0.252321
ENSMUSG00000001802	Lrp3	692.184	454.211	930.157	2.04785	1.03411	2.84271e-18	8.27837e-17
ENSMUSG00000082596	Gm14227	3.00497	1.97205	4.03788	2.04755	1.0339	0.417012	0.658952
ENSMUSG00000036111	Lmo1	46.6582	30.6334	62.6829	2.04623	1.03297	0.00194333	0.00913872
ENSMUSG00000087683	Gm11712	1.69807	1.11487	2.28127	2.04622	1.03296	0.752301	0.915226
ENSMUSG00000024395	Lims2	3337.06	2191.87	4482.24	2.04494	1.03206	1.2443e-21	4.43012e-20
ENSMUSG00000030577	Cd22	48.1618	31.6426	64.6809	2.04411	1.03147	0.00172525	0.0082467
ENSMUSG00000020154	Ptprb	13103.5	8611.38	17595.6	2.0433	1.0309	1.97602e-26	9.50297e-25
ENSMUSG00000092550	Gm20496	4.9928	3.28257	6.70304	2.04201	1.02999	0.573715	0.793396
ENSMUSG00000078965	Gm12033	206.74	135.961	277.518	2.04116	1.02939	6.97765e-08	7.77902e-07
ENSMUSG00000082756	Gm14888	1.30327	0.857183	1.74935	2.04081	1.02914	0.638306	0.842802
ENSMUSG00000022286	Grhl2	302.292	198.861	405.723	2.04023	1.02873	4.04976e-09	5.24307e-08
ENSMUSG00000092596	Gm20490	6.49808	4.27504	8.72112	2.04001	1.02858	0.39834	0.642103
ENSMUSG00000048191	Muc6	268.117	176.397	359.838	2.03993	1.02852	2.59982e-08	3.06072e-07
ENSMUSG00000079685	Ulbp1	702.767	462.393	943.142	2.0397	1.02836	1.31132e-15	3.20909e-14
ENSMUSG00000059146	Ntrk3	150.217	98.8634	201.571	2.03888	1.02778	1.47676e-08	1.80099e-07
ENSMUSG00000044317	Gpr4	1153.56	759.295	1547.82	2.0385	1.02751	8.24009e-18	2.32005e-16
ENSMUSG00000093357		11.6946	7.70024	15.6891	2.03748	1.02678	0.340638	0.579876
ENSMUSG00000074877	Gm10780	1.50435	0.990622	2.01808	2.03719	1.02658	0.512517	0.744106
ENSMUSG00000028223	Decr1	26264.7	17296.8	35232.7	2.03694	1.02641	5.48823e-25	2.42294e-23
ENSMUSG00000051682	Treml4	31.5345	20.7683	42.3008	2.03679	1.0263	0.00812722	0.0313472
ENSMUSG00000024366	Gfra3	34.6533	22.823	46.4837	2.03671	1.02624	0.00113475	0.00569026
ENSMUSG00000041674	BC006965	15.5074	10.2143	20.8006	2.03643	1.02604	0.0626622	0.170667
ENSMUSG00000031144	Syp	45.3312	29.8585	60.8039	2.0364	1.02602	0.00185249	0.00877091
ENSMUSG00000039713	Plekhg5	4961.37	3268.97	6653.78	2.03544	1.02534	7.53685e-23	2.85856e-21
ENSMUSG00000057286	St6galnac2	730.458	481.298	979.617	2.03536	1.02529	5.1672e-15	1.21084e-13
ENSMUSG00000042246	Tmc7	1208.09	796.169	1620.01	2.03475	1.02485	7.13133e-18	2.02076e-16
ENSMUSG00000040998	Npnt	301.729	198.885	404.574	2.03421	1.02447	9.81157e-10	1.38567e-08
ENSMUSG00000085876	Gm12409	78.9648	52.0514	105.878	2.03411	1.0244	0.00128922	0.00638362
ENSMUSG00000030329	C530028O21Rik	101.34	66.8083	135.873	2.03377	1.02416	1.87624e-06	1.67068e-05
ENSMUSG00000025584	Pde8a	2607.7	1719.46	3495.94	2.03317	1.02373	4.10178e-22	1.4941e-20
ENSMUSG00000067081	Asb18	287.216	189.448	384.985	2.03214	1.023	2.03218e-11	3.44534e-10
ENSMUSG00000026062	Slc9a2	129.337	85.3147	173.359	2.032	1.0229	2.55477e-06	2.22199e-05
ENSMUSG00000042256	3110082D06Rik	5.21821	3.44244	6.99398	2.03169	1.02268	0.143187	0.318268
ENSMUSG00000086291	Gm15513	31.1332	20.5399	41.7266	2.03149	1.02254	0.0296885	0.0931944
ENSMUSG00000087277	2010013B24Rik	9.11158	6.0123	12.2109	2.03098	1.02218	0.179808	0.373597
ENSMUSG00000062257	Opcml	70.9472	46.8583	95.0362	2.02816	1.02017	0.000131994	0.000827975
ENSMUSG00000065537	Mir132	2.60942	1.72356	3.49528	2.02795	1.02002	0.248825	0.469265
ENSMUSG00000096007		7.00763	4.6287	9.38656	2.0279	1.01999	0.346186	0.585979
ENSMUSG00000047419	Cmya5	21579.8	14255.2	28904.3	2.02763	1.0198	1.33875e-26	6.49487e-25
ENSMUSG00000075705	Sepx1	3132.37	2069.27	4195.47	2.02751	1.01971	7.50795e-19	2.25484e-17
ENSMUSG00000093598	A730085K08Rik	5.71169	3.77337	7.65002	2.02737	1.01961	0.325448	0.561861
ENSMUSG00000028441	1110017D15Rik	13.2172	8.73284	17.7016	2.02701	1.01936	0.32636	0.562997
ENSMUSG00000083849	Gm13477	9.10921	6.01866	12.1998	2.02699	1.01934	0.360195	0.600829
ENSMUSG00000048107	Kctd12	4184.45	2765.68	5603.22	2.02598	1.01862	1.01507e-23	4.06656e-22
ENSMUSG00000040740	Slc25a34	6340.02	4190.69	8489.36	2.02577	1.01847	6.81614e-25	2.98531e-23
ENSMUSG00000069268	Hist1h2bf	3.41306	2.25633	4.5698	2.02532	1.01815	0.481822	0.719071
ENSMUSG00000040420	Cdh18	5.62257	3.71752	7.52761	2.0249	1.01785	0.225211	0.439356
ENSMUSG00000037347	Chst7	479.925	317.325	642.525	2.02482	1.01779	4.19962e-14	9.00898e-13
ENSMUSG00000038994	Hils1	214.149	141.605	286.692	2.02459	1.01763	1.15031e-08	1.41539e-07
ENSMUSG00000021303	Gng4	12.7395	8.42398	17.0549	2.02457	1.01762	0.0855258	0.21675
ENSMUSG00000040584	Abcb1a	1715.01	1134.2	2295.81	2.02417	1.01733	1.10052e-19	3.48034e-18
ENSMUSG00000026442	Nfasc	45.6652	30.2046	61.1259	2.02373	1.01702	0.00313172	0.0137763
ENSMUSG00000038668	Lpar1	1485.76	982.847	1988.67	2.02338	1.01677	1.2439e-19	3.9058e-18
ENSMUSG00000032128	Robo3	23.7594	15.7175	31.8013	2.0233	1.01671	0.0311631	0.096982
ENSMUSG00000075032	Hist1h3i	5.20944	3.44711	6.97177	2.0225	1.01614	0.49093	0.727094
ENSMUSG00000064582		79.023	52.2927	105.753	2.02233	1.01602	0.000351665	0.00199889
ENSMUSG00000086961	Gm12946	16.8467	11.1507	22.5427	2.02163	1.01552	0.0779921	0.202398
ENSMUSG00000085252	8430437L04Rik	21.0502	13.9335	28.1669	2.02153	1.01545	0.120111	0.279753
ENSMUSG00000008658	Rbfox1	1985.27	1314.14	2656.4	2.0214	1.01535	1.80951e-22	6.72444e-21
ENSMUSG00000030409	Dmpk	21279.9	14090.2	28469.5	2.02052	1.01473	8.11081e-23	3.07098e-21
ENSMUSG00000004609	Cd33	208.19	137.861	278.52	2.02029	1.01456	2.17158e-08	2.58971e-07
ENSMUSG00000026805	Barhl1	6.21665	4.11784	8.31546	2.01937	1.01391	0.315494	0.551141
ENSMUSG00000040152	Thbs1	10085.8	6681.21	13490.4	2.01915	1.01375	3.67728e-25	1.6532e-23
ENSMUSG00000041930	BC057022	626.919	415.297	838.541	2.01914	1.01374	1.56898e-16	4.06976e-15
ENSMUSG00000026399	Cd55	1482.88	982.56	1983.2	2.0184	1.01321	2.21251e-20	7.26771e-19
ENSMUSG00000053046	Brsk2	14.7538	9.77632	19.7312	2.01827	1.01312	0.0820796	0.210384
ENSMUSG00000073591	Pcdhb22	334.072	221.372	446.773	2.0182	1.01307	8.17836e-12	1.44539e-10
ENSMUSG00000079018	Ly6c1	3515.61	2330.19	4701.03	2.01744	1.01253	1.29061e-22	4.84506e-21
ENSMUSG00000072722	Gm6588	1.00495	0.666214	1.34368	2.01689	1.01213	0.538021	0.766509
ENSMUSG00000041577	Prelp	2510.26	1664.39	3356.12	2.01642	1.0118	3.14755e-21	1.09588e-19
ENSMUSG00000046683	0610025J13Rik	36.6857	24.336	49.0354	2.01493	1.01073	0.00228071	0.0104579
ENSMUSG00000029408	Abcb9	490.758	325.56	655.956	2.01486	1.01068	2.85696e-13	5.72793e-12
ENSMUSG00000060887	Gm12960	172.066	114.225	229.908	2.01276	1.00918	2.27553e-08	2.70491e-07
ENSMUSG00000004768	Rab23	1660.1	1102.04	2218.15	2.01276	1.00918	1.15161e-19	3.63671e-18
ENSMUSG00000082605	Gm16148	27.6359	18.3491	36.9226	2.01223	1.00879	0.0331888	0.101978
ENSMUSG00000043050	Tnp2	1.10314	0.732934	1.47335	2.01021	1.00735	0.874594	0.976892
ENSMUSG00000070980	Actl7b	3.91439	2.6008	5.22798	2.01014	1.00729	0.554041	0.77833
ENSMUSG00000044172	Ptx4	6.21973	4.13339	8.30606	2.0095	1.00684	0.685637	0.873554
ENSMUSG00000029135	Fosl2	4501.03	2992.96	6009.1	2.00774	1.00557	1.54614e-23	6.1717e-22
ENSMUSG00000085303	Gm16751	4.42442	2.94261	5.90622	2.00714	1.00514	0.359735	0.600347
ENSMUSG00000026674	Ddr2	3969.23	2639.91	5298.56	2.0071	1.00512	5.10425e-22	1.8501e-20
ENSMUSG00000028773	Fabp3	158658	105628	211688	2.0041	1.00296	2.6797e-24	1.11818e-22
ENSMUSG00000028599	Tnfrsf1b	895.946	596.59	1195.3	2.00356	1.00257	1.71462e-16	4.43711e-15
ENSMUSG00000027412	Lpin3	303.712	202.289	405.135	2.00275	1.00199	2.29232e-10	3.47293e-09
ENSMUSG00000014704	Hoxa2	26.1667	17.4301	34.9033	2.00248	1.00179	0.0180635	0.0618671
ENSMUSG00000051486	Pcdhb11	63.5492	42.3483	84.75	2.00126	1.00091	0.000177671	0.0010873
ENSMUSG00000041062	Mslnl	6.13249	4.08859	8.17639	1.99981	0.999863	0.558123	0.781439
ENSMUSG00000092233	Gm20403	38.8305	25.8913	51.7696	1.9995	0.999636	0.0280962	0.0892368
ENSMUSG00000020029	Nudt4	20862.1	13910.8	27813.4	1.99942	0.999579	2.20676e-23	8.72977e-22
ENSMUSG00000030103	Bhlhe40	5695.11	3797.87	7592.35	1.99911	0.999355	3.18072e-22	1.17019e-20
ENSMUSG00000037217	Syn1	38.1824	25.4628	50.9021	1.99908	0.999336	0.00168937	0.00809621
ENSMUSG00000051457	Spn	82.6476	55.1214	110.174	1.99874	0.999094	0.000155114	0.000960982
ENSMUSG00000044916	1700029I15Rik	32.0175	21.3543	42.6808	1.9987	0.999064	0.0230996	0.0760026
ENSMUSG00000064492		1.5085	1.00617	2.01083	1.99849	0.99891	0.643395	0.84608
ENSMUSG00000081829	Gm15460	3.21702	2.14579	4.28825	1.99845	0.998884	0.786719	0.934002
ENSMUSG00000048967	Yjefn3	252.181	168.214	336.149	1.99834	0.998801	1.41658e-08	1.73047e-07
ENSMUSG00000026959	Grin1	2.41367	1.61018	3.21715	1.998	0.998559	0.815912	0.949017
ENSMUSG00000074925	Ptar1	266.271	177.643	354.898	1.99781	0.998422	9.3031e-12	1.63111e-10
ENSMUSG00000016494	Cd34	28271.5	18862.5	37680.6	1.99764	0.998298	2.49088e-23	9.76619e-22
ENSMUSG00000078922	Tgtp1	23.0681	15.3911	30.7451	1.99759	0.998259	0.0124587	0.0451358
ENSMUSG00000017652	Cd40	353.742	236.06	471.424	1.99705	0.997873	5.88595e-11	9.51145e-10
ENSMUSG00000047793	Sned1	3785.54	2526.88	5044.19	1.99621	0.997264	1.30873e-22	4.90474e-21
ENSMUSG00000022431	Ribc2	17.4288	11.6353	23.2222	1.99584	0.996995	0.10257	0.248943
ENSMUSG00000050445	Cyp8b1	20.1611	13.4622	26.86	1.99522	0.996545	0.028005	0.0890497
ENSMUSG00000036186	Fam69b	342.806	228.954	456.657	1.99454	0.996053	7.80138e-11	1.24698e-09
ENSMUSG00000030701	Plekhb1	48.4577	32.3782	64.5372	1.99323	0.995108	0.00115062	0.00576068
ENSMUSG00000095943		5.73909	3.83541	7.64276	1.99268	0.994713	0.428596	0.670362
ENSMUSG00000035441	Myo1d	2198.14	1469.06	2927.21	1.99258	0.994636	4.47867e-22	1.6287e-20
ENSMUSG00000078960	Tob2	28.323	18.9334	37.7126	1.99186	0.994115	0.0288991	0.0911958
ENSMUSG00000059970	Hspa2	1065.28	712.5	1418.06	1.99025	0.992953	2.95279e-16	7.57905e-15
ENSMUSG00000034839	Larp6	44.4856	29.7762	59.1949	1.98799	0.991311	0.00472907	0.0197184
ENSMUSG00000090075	Gm16251	2.11983	1.41921	2.82045	1.98733	0.990834	0.711432	0.889812
ENSMUSG00000029526	1700123K08Rik	2.32773	1.55901	3.09644	1.98616	0.989978	0.548956	0.775133
ENSMUSG00000032125	Robo4	6443.52	4316.31	8570.74	1.98567	0.989622	3.54805e-22	1.30316e-20
ENSMUSG00000022847	Thpo	10.6008	7.10243	14.0993	1.98513	0.989236	0.112017	0.265784
ENSMUSG00000020774	Aspa	26.44	17.719	35.1609	1.98436	0.988674	0.0266875	0.0856499
ENSMUSG00000020333	Acsl6	38.2343	25.6254	50.8431	1.98409	0.988476	0.0137838	0.0491699
ENSMUSG00000037990	Sh3rf3	70.8652	47.5043	94.2261	1.98353	0.98807	0.000367763	0.00207994
ENSMUSG00000085185	BC028777	2.42422	1.62573	3.2227	1.98231	0.98718	0.550833	0.776329
ENSMUSG00000020122	Egfr	802.519	538.211	1066.83	1.98217	0.987083	6.08031e-16	1.52519e-14
ENSMUSG00000092465	Gm4425	4.74832	3.18475	6.31189	1.98191	0.986892	0.410098	0.65244
ENSMUSG00000074971	Fibin	702.695	471.325	934.065	1.98178	0.9868	3.26648e-16	8.37449e-15
ENSMUSG00000065728		5.55592	3.72671	7.38513	1.98167	0.986719	0.232742	0.448929
ENSMUSG00000030844	Rgs10	326.488	219.023	433.953	1.98131	0.986455	1.27395e-09	1.76198e-08
ENSMUSG00000073435	Nme3	12.515	8.39571	16.6343	1.98129	0.98644	0.186162	0.382692
ENSMUSG00000082357	Gm13542	18.5692	12.4579	24.6806	1.98113	0.986322	0.19036	0.389006
ENSMUSG00000025969	Nrp2	9544.41	6405.39	12683.4	1.98012	0.985588	1.164e-22	4.38467e-21
ENSMUSG00000086155	9430041J12Rik	2.01523	1.35249	2.67797	1.98002	0.985518	0.867745	0.973799
ENSMUSG00000020600	Slc7a15	5.55122	3.72671	7.37573	1.97915	0.984883	0.523928	0.755154
ENSMUSG00000043448	Gjc2	65.1433	43.7386	86.5479	1.97876	0.984593	0.00218248	0.0100763
ENSMUSG00000087466	A330041J22Rik	12.5283	8.41295	16.6437	1.97835	0.984295	0.113772	0.269031
ENSMUSG00000084996	Gm11419	2.32133	1.55901	3.08364	1.97794	0.983998	0.982045	1
ENSMUSG00000028551	Cdkn2c	2111.64	1418.24	2805.05	1.97784	0.983927	1.07255e-17	3.00833e-16
ENSMUSG00000002032	Tmem25	671.463	451.03	891.895	1.97747	0.983652	1.21198e-12	2.28856e-11
ENSMUSG00000074743	Thbd	5198.76	3492.26	6905.27	1.97731	0.983538	1.87906e-21	6.61537e-20
ENSMUSG00000085871	Gm12698	31.7051	21.3011	42.1092	1.97686	0.983209	0.0327071	0.100863
ENSMUSG00000038932	Tcfl5	9.0012	6.0496	11.9528	1.9758	0.982435	0.29872	0.531512
ENSMUSG00000042846	Lrrtm3	42.0591	28.2724	55.8459	1.97528	0.98206	0.00345672	0.0149997
ENSMUSG00000005338	Cadm3	97.4616	65.5174	129.406	1.97514	0.981952	1.51698e-05	0.000115111
ENSMUSG00000019899	Lama2	22361.4	15032.6	29690.1	1.97504	0.981884	4.29125e-24	1.77388e-22
ENSMUSG00000039934	Pion	402.243	270.422	534.064	1.97493	0.981804	5.62432e-11	9.10867e-10
ENSMUSG00000039385	Cdh6	83.0079	55.8353	110.181	1.97331	0.98062	0.000238282	0.00141928
ENSMUSG00000093956		14.4723	9.73635	19.2082	1.97284	0.980273	0.0733108	0.19311
ENSMUSG00000032098	Treh	2.9301	1.97205	3.88814	1.97162	0.97938	0.600668	0.814794
ENSMUSG00000065422	Mir221	2.0226	1.36168	2.68352	1.97074	0.978736	0.491153	0.727094
ENSMUSG00000015134	Aldh1a3	289.297	194.774	383.82	1.97059	0.978631	3.64917e-10	5.40615e-09
ENSMUSG00000048602	Morc2b	13.3555	8.99237	17.7187	1.97041	0.978496	0.090948	0.227154
ENSMUSG00000074868	Gm6478	13.1486	8.85878	17.4384	1.96849	0.977089	0.364836	0.606019
ENSMUSG00000083076	Gm11408	4.36321	2.94261	5.78381	1.96554	0.974923	0.213798	0.42363
ENSMUSG00000019933	2310015B20Rik	10.7247	7.2332	14.2161	1.9654	0.974822	0.253938	0.476125
ENSMUSG00000062028	Irgc1	2.93051	1.97673	3.88429	1.96501	0.974537	0.933736	1
ENSMUSG00000094414		12.4465	8.39739	16.4957	1.96438	0.974076	0.172714	0.363996
ENSMUSG00000079711	Smok4a	7.81019	5.27018	10.3502	1.96392	0.973735	0.100607	0.245421
ENSMUSG00000078670	Fam174b	11092.8	7486.11	14699.5	1.96357	0.973476	3.68891e-21	1.27432e-19
ENSMUSG00000033949	Trim36	117.32	79.1837	155.456	1.96323	0.973232	6.76597e-05	0.000452582
ENSMUSG00000085146	Eif2c5	2.02664	1.36805	2.68523	1.96282	0.972929	0.70766	0.887863
ENSMUSG00000048163	Selplg	143.321	96.8039	189.838	1.96106	0.971633	1.1304e-05	8.79228e-05
ENSMUSG00000086231	4732447D17Rik	43.8082	29.5916	58.0249	1.96085	0.971482	0.00291562	0.0129652
ENSMUSG00000087698	Gm13031	6.48667	4.38189	8.59145	1.96067	0.971349	0.292311	0.524364
ENSMUSG00000079465	Col4a3	398.523	269.229	527.817	1.96048	0.971207	4.22895e-10	6.21917e-09
ENSMUSG00000029636	Wasf3	87.2016	58.9127	115.49	1.96037	0.971123	6.86355e-05	0.000457722
ENSMUSG00000002983	Relb	829.581	560.541	1098.62	1.95993	0.970804	5.9377e-17	1.58871e-15
ENSMUSG00000088248	Mir1969	3.24674	2.19413	4.29935	1.95948	0.970474	0.479142	0.716915
ENSMUSG00000066129	Kndc1	1.71862	1.16153	2.27572	1.95925	0.970302	1	1
ENSMUSG00000050345	4930486L24Rik	86.3867	58.4065	114.367	1.95812	0.969468	0.000109782	0.0007016
ENSMUSG00000037106	Fer1l6	175.455	118.628	232.283	1.95809	0.969446	1.18775e-07	1.27708e-06
ENSMUSG00000012123	Aim1l	3.23808	2.18961	4.28655	1.95767	0.969141	0.808595	0.945589
ENSMUSG00000028072	Ntrk1	27.4775	18.5805	36.3745	1.95767	0.969134	0.0341093	0.104313
ENSMUSG00000081933	Gm14767	4.25809	2.88041	5.63578	1.95659	0.968343	0.358346	0.598601
ENSMUSG00000086601	Gm16257	0.915718	0.619561	1.21187	1.95602	0.967924	0.857041	0.967201
ENSMUSG00000085826	Gm15638	2.93595	1.98761	3.88429	1.95426	0.966621	1	1
ENSMUSG00000048469	Olfr564	0.914864	0.619561	1.21017	1.95327	0.96589	0.674242	0.866412
ENSMUSG00000045281	Gpr20	67.79	45.9104	89.6696	1.95314	0.965799	0.000401729	0.0022507
ENSMUSG00000021256	Vash1	4044.93	2739.93	5349.93	1.95258	0.965381	4.86978e-21	1.66144e-19
ENSMUSG00000072844	G530011O06Rik	328.869	222.778	434.961	1.95244	0.965278	8.70933e-08	9.57419e-07
ENSMUSG00000004730	Emr1	570.394	386.538	754.25	1.95129	0.964431	5.36965e-11	8.72183e-10
ENSMUSG00000078925	D030018L15Rik	6.79328	4.60396	8.9826	1.95106	0.964257	0.444663	0.684795
ENSMUSG00000029096	Htra3	3345.95	2267.86	4424.04	1.95076	0.964033	1.0304e-19	3.2821e-18
ENSMUSG00000083306	Gm13868	3.76084	2.54964	4.97205	1.9501	0.963549	0.38719	0.630064
ENSMUSG00000091472	Gm3739	154.708	104.912	204.504	1.94929	0.962947	3.61704e-06	3.06028e-05
ENSMUSG00000004748	Mtfp1	3543.84	2403.24	4684.44	1.94921	0.962893	1.08331e-19	3.44072e-18
ENSMUSG00000091370	5730435O14Rik	1.52257	1.0326	2.01253	1.94899	0.96273	0.919663	0.999299
ENSMUSG00000029544	Cabp1	459.328	311.546	607.111	1.94871	0.962516	3.42924e-12	6.2302e-11
ENSMUSG00000012777	Acpt	7.92852	5.37887	10.4782	1.94802	0.962009	0.134366	0.304235
ENSMUSG00000084984	1700006P19Rik	47.6715	32.3414	63.0016	1.94802	0.962005	0.00471886	0.0196796
ENSMUSG00000084617		1.52171	1.0326	2.01083	1.94734	0.961506	0.742671	0.909599
ENSMUSG00000069305	Hist1h4n	1.83292	1.2438	2.42204	1.9473	0.961474	0.491148	0.727094
ENSMUSG00000089960	Ugt1a1	1.21733	0.826081	1.60858	1.94724	0.961429	1	1
ENSMUSG00000032649	Glt25d2	980.197	665.364	1295.03	1.94635	0.960769	3.29298e-16	8.43262e-15
ENSMUSG00000093453	Vmn1r-ps146	2.74501	1.86336	3.62666	1.9463	0.960738	0.525808	0.75653
ENSMUSG00000025478	Dpysl4	165.743	112.535	218.952	1.94564	0.960241	1.62108e-07	1.69994e-06
ENSMUSG00000067833	2900097C17Rik	185.487	125.959	245.016	1.9452	0.959919	1.16221e-06	1.0676e-05
ENSMUSG00000078984	Gm11027	2.23272	1.51704	2.94841	1.94354	0.958684	0.881269	0.980381
ENSMUSG00000061878	Sphk1	227.201	154.396	300.007	1.9431	0.958361	1.5358e-08	1.86887e-07
ENSMUSG00000081657	Gm15466	1.83014	1.2438	2.41649	1.94284	0.958164	0.758644	0.918965
ENSMUSG00000087560	Gm15396	2.13175	1.45032	2.81319	1.93971	0.955841	0.875215	0.976892
ENSMUSG00000086785	Gm6081	2.54895	1.73443	3.36347	1.93924	0.955489	0.432613	0.673687
ENSMUSG00000026873	Phf19	468.411	318.886	617.935	1.9378	0.954416	1.39473e-10	2.17578e-09
ENSMUSG00000004872	Pax3	2.95579	2.01235	3.89924	1.93766	0.954314	0.24281	0.461573
ENSMUSG00000030745	Il21r	67.2795	45.8073	88.7516	1.9375	0.954196	0.000288466	0.00167789
ENSMUSG00000078921	Tgtp2	34.8858	23.7576	46.014	1.93681	0.953685	0.014409	0.0510618
ENSMUSG00000022103	Gfra2	499.287	340.157	658.417	1.93563	0.952801	3.56856e-12	6.46735e-11
ENSMUSG00000044951	Mylk4	5530.9	3768.36	7293.44	1.93544	0.952661	2.86753e-22	1.05849e-20
ENSMUSG00000040219	Ttc12	2140.5	1458.51	2822.49	1.93519	0.952476	7.57998e-18	2.13965e-16
ENSMUSG00000078202	Nrarp	2977.72	2029.07	3926.36	1.93506	0.952375	1.49071e-18	4.40508e-17
ENSMUSG00000000628	Hk2	13527.5	9221.42	17833.6	1.93393	0.951539	3.35914e-21	1.16222e-19
ENSMUSG00000085705	Gm16046	98.2716	66.994	129.549	1.93374	0.951395	0.000130241	0.000818372
ENSMUSG00000087230	2310006M14Rik	1.7264	1.17708	2.27572	1.93337	0.951115	1	1
ENSMUSG00000022587	Ly6e	9081.13	6192.06	11970.2	1.93315	0.950957	6.65697e-20	2.13274e-18
ENSMUSG00000076695	Ighv1-18	1.6282	1.11036	2.14605	1.93276	0.950659	0.748659	0.912882
ENSMUSG00000085702	Gm16722	9.17384	6.26265	12.085	1.9297	0.948376	0.12063	0.280559
ENSMUSG00000063529	Gm1574	10.398	7.10074	13.6953	1.92871	0.94764	0.101879	0.247729
ENSMUSG00000060923	Acyp2	2023.03	1381.64	2664.42	1.92845	0.947442	6.4965e-18	1.84561e-16
ENSMUSG00000087593	Gm16174	10.4971	7.16931	13.825	1.92836	0.947371	0.155116	0.33691
ENSMUSG00000044646	Zbtb7c	272.396	186.061	358.731	1.92803	0.947128	4.37951e-09	5.64021e-08
ENSMUSG00000074467	Gm10702	16.1032	11	21.2063	1.92783	0.946981	0.106746	0.256424
ENSMUSG00000086018	Gm13179	2.84735	1.94563	3.74907	1.92692	0.946299	0.928961	1
ENSMUSG00000061322	Dnaic1	45.0319	30.7759	59.2878	1.92644	0.945936	0.0249131	0.0808615
ENSMUSG00000028713	Cyp4b1	737.129	503.788	970.47	1.92635	0.945867	1.2789e-12	2.40463e-11
ENSMUSG00000010307	Tmem86a	2057.15	1406.01	2708.29	1.92622	0.94577	1.29478e-17	3.62243e-16
ENSMUSG00000030617	Ccdc83	7.32431	5.00613	9.64249	1.92614	0.945711	0.572347	0.792447
ENSMUSG00000060183	Cxcl11	1.32885	0.908351	1.74935	1.92585	0.945495	0.639021	0.843292
ENSMUSG00000088969		1.32885	0.908351	1.74935	1.92585	0.945495	0.639021	0.843292
ENSMUSG00000027859	Ngf	331.176	226.424	435.928	1.92528	0.945066	3.74015e-09	4.85933e-08
ENSMUSG00000041552	Ptchd1	40.7847	27.8853	53.6841	1.92517	0.944989	0.00796159	0.0308269
ENSMUSG00000062542	Syt9	9.68969	6.6255	12.7539	1.92497	0.944835	0.124974	0.287991
ENSMUSG00000060284	Sp7	3.47201	2.37422	4.5698	1.92476	0.944678	0.482712	0.719771
ENSMUSG00000035699	Osta	213.455	145.996	280.914	1.92411	0.944195	7.62567e-07	7.19662e-06
ENSMUSG00000049928	Glp2r	16.7371	11.4489	22.0253	1.9238	0.943956	0.0536443	0.150904
ENSMUSG00000044676	Zfp612	988.289	676.323	1300.26	1.92254	0.943012	3.97474e-15	9.414e-14
ENSMUSG00000038607	Gng10	175.611	120.181	231.04	1.92244	0.942939	5.49103e-05	0.000375493
ENSMUSG00000038236	Hoxa7	16.139	11.0465	21.2315	1.922	0.942608	0.103158	0.24991
ENSMUSG00000029700	Slc13a1	3.37104	2.3075	4.43458	1.92181	0.942466	0.481169	0.718433
ENSMUSG00000047747	Rnf150	2904.23	1988.08	3820.38	1.92164	0.94234	9.49607e-19	2.83648e-17
ENSMUSG00000046229	Scand1	818.128	560.156	1076.1	1.92107	0.941911	5.70754e-11	9.23667e-10
ENSMUSG00000050150	Nhedc1	11.4329	7.829	15.0369	1.92066	0.941603	0.142313	0.316899
ENSMUSG00000090628	Gm17083	18.7847	12.8696	24.6998	1.91924	0.940534	0.0549685	0.153898
ENSMUSG00000084917	Gm17477	51.4034	35.2278	67.5791	1.91834	0.939862	0.00134044	0.00661501
ENSMUSG00000092850	Mir344g	2.04807	1.40366	2.69249	1.91819	0.939743	0.577082	0.79546
ENSMUSG00000031494	Cd209a	1.94399	1.33243	2.55556	1.91797	0.93958	0.47001	0.70853
ENSMUSG00000041313	Slc7a1	8300.87	5689.8	10911.9	1.91781	0.939459	1.55813e-21	5.5119e-20
ENSMUSG00000037999	Arap2	878.317	602.088	1154.55	1.91757	0.939279	6.37455e-16	1.59357e-14
ENSMUSG00000072769	Gm10419	3.4766	2.38341	4.5698	1.91734	0.939105	0.420222	0.661986
ENSMUSG00000053765	Oas1f	1.02361	0.701831	1.34539	1.91697	0.938828	0.677837	0.868806
ENSMUSG00000087349	Gm12680	1.02361	0.701831	1.34539	1.91697	0.938828	0.677837	0.868806
ENSMUSG00000055026	Gabrg3	39.2181	26.8955	51.5406	1.91633	0.938344	0.0310457	0.0966578
ENSMUSG00000032334	Loxl1	5690.49	3903.15	7477.84	1.91585	0.937983	2.37116e-19	7.26957e-18
ENSMUSG00000062038	Gm10108	44.0441	30.2127	57.8755	1.9156	0.937798	0.00354859	0.0153625
ENSMUSG00000021186	Fbln5	2716.24	1863.27	3569.22	1.91557	0.937771	2.67107e-17	7.31529e-16
ENSMUSG00000055415	Atp10b	3.57393	2.45181	4.69606	1.91534	0.9376	0.546496	0.773292
ENSMUSG00000030683	Sez6l2	1842.92	1264.36	2421.48	1.91518	0.937479	7.49117e-17	1.98989e-15
ENSMUSG00000096768		5075.5	3482.29	6668.72	1.91504	0.937375	7.86742e-13	1.51276e-11
ENSMUSG00000025930	Msc	233.797	160.443	307.152	1.9144	0.936892	1.32586e-07	1.41387e-06
ENSMUSG00000029121	Crmp1	670.719	460.347	881.092	1.91397	0.936571	5.01309e-12	8.95299e-11
ENSMUSG00000048826	Dact2	108.096	74.195	141.997	1.91384	0.936469	3.77967e-05	0.000266702
ENSMUSG00000087557	Gm15869	13.7884	9.46577	18.1111	1.91332	0.936082	0.292522	0.524501
ENSMUSG00000079492	Gm11127	5.32273	3.65532	6.99013	1.91232	0.935323	0.308972	0.543062
ENSMUSG00000033826	Dnahc8	151.176	103.829	198.522	1.91201	0.935092	7.08795e-06	5.68943e-05
ENSMUSG00000013611	Snx31	7.76343	5.33238	10.1945	1.91181	0.934936	0.396899	0.640482
ENSMUSG00000023915	Tnfrsf21	1290.52	886.45	1694.59	1.91166	0.934824	7.01955e-16	1.74493e-14
ENSMUSG00000067872	Ccdc87	3.77265	2.59162	4.95369	1.91143	0.934652	0.983021	1
ENSMUSG00000074852	Hpse2	20.1309	13.8293	26.4325	1.91135	0.934588	0.084741	0.215281
ENSMUSG00000036545	Adamts2	5890.64	4049.75	7731.53	1.90914	0.93292	8.16643e-20	2.605e-18
ENSMUSG00000094338	Hist1h2bl	1.94433	1.33694	2.55171	1.90862	0.932529	0.862919	0.970515
ENSMUSG00000067206	Lrrc66	9.19462	6.323	12.0662	1.90831	0.932294	0.451906	0.691869
ENSMUSG00000007805	Twist2	72.5222	49.8832	95.1612	1.90768	0.93182	0.000221833	0.00132955
ENSMUSG00000041794	Myrip	120.988	83.2197	158.756	1.90768	0.931818	9.087e-06	7.1998e-05
ENSMUSG00000026751	Nr5a1	12.896	8.87433	16.9176	1.90635	0.930814	0.221889	0.43513
ENSMUSG00000036995	Asap3	826.328	568.798	1083.86	1.90552	0.930186	2.65082e-14	5.78203e-13
ENSMUSG00000048486	Fitm2	5936.13	4086.36	7785.91	1.90534	0.93005	4.44271e-20	1.43585e-18
ENSMUSG00000095280		2.96153	2.03877	3.88429	1.90521	0.929951	1	1
ENSMUSG00000001583	Tnk1	13.2978	9.15676	17.4388	1.90448	0.929395	0.197504	0.400157
ENSMUSG00000043727	F830045P16Rik	3.48629	2.40065	4.57194	1.90446	0.929382	0.27051	0.49727
ENSMUSG00000028777	Gnat3	10.1456	6.98922	13.302	1.90322	0.928443	0.154149	0.335578
ENSMUSG00000089779	Gm15641	1.9407	1.33694	2.54446	1.90319	0.928419	1	1
ENSMUSG00000021411	1300014I06Rik	1528.48	1053.03	2003.93	1.903	0.928279	6.13378e-16	1.53511e-14
ENSMUSG00000019852	D10Bwg1379e	81.4534	56.132	106.775	1.90221	0.927678	0.000133794	0.000837833
ENSMUSG00000083962	Gm15707	7.16576	4.93941	9.39211	1.90147	0.927112	0.318576	0.554157
ENSMUSG00000058589	Anks1b	10.9568	7.55294	14.3607	1.90135	0.927021	0.156526	0.339299
ENSMUSG00000039198	Ptchd3	53.4857	36.8777	70.0937	1.90071	0.926536	0.00164966	0.00793003
ENSMUSG00000049013	Prss48	1.43674	0.990622	1.88286	1.90069	0.926521	0.512795	0.74426
ENSMUSG00000094224	Gm13018	16.9977	11.7219	22.2735	1.90016	0.926118	0.182804	0.377934
ENSMUSG00000086513	9130208D14Rik	143.806	99.1994	188.412	1.89933	0.92549	2.07434e-07	2.14469e-06
ENSMUSG00000066885	Ptprv	5.42463	3.74226	7.107	1.89912	0.925329	0.607318	0.819835
ENSMUSG00000065489	Mir365-2	2.5581	1.76553	3.35067	1.89782	0.924343	0.758789	0.919064
ENSMUSG00000074457	S100a16	4437.34	3062.63	5812.06	1.89774	0.924279	6.76e-18	1.918e-16
ENSMUSG00000040875	Osbpl10	263.416	181.929	344.904	1.89581	0.922816	5.69118e-08	6.41722e-07
ENSMUSG00000028071	Sh2d2a	14.261	9.84956	18.6725	1.89577	0.922783	0.12204	0.282935
ENSMUSG00000029026	Trp73	3.17635	2.19413	4.15858	1.89532	0.922445	0.679059	0.869464
ENSMUSG00000069302	Hist1h2ah	1.43397	0.990622	1.87731	1.89508	0.922262	0.808875	0.945791
ENSMUSG00000020456	Ogdh	122649	84734.6	160563	1.89489	0.922114	5.35955e-21	1.82291e-19
ENSMUSG00000064970		3.69046	2.54964	4.83128	1.89489	0.922113	0.549203	0.775185
ENSMUSG00000076949		5.95291	4.11333	7.7925	1.89445	0.921781	0.313799	0.549353
ENSMUSG00000051335	Gfod1	4148.89	2867.39	5430.38	1.89384	0.921313	1.74465e-19	5.40132e-18
ENSMUSG00000086580	Gm15280	8.51242	5.88337	11.1415	1.89372	0.921222	0.240391	0.458594
ENSMUSG00000081259	Gm6893	1.33663	0.923903	1.74935	1.89343	0.921005	0.639233	0.84332
ENSMUSG00000083503	Gm13407	1.33663	0.923903	1.74935	1.89343	0.921005	0.639233	0.84332
ENSMUSG00000085249	Gm12847	11.1742	7.72482	14.6235	1.89305	0.920716	0.29414	0.526419
ENSMUSG00000027329	Spef1	956.943	661.565	1252.32	1.89297	0.92065	4.12338e-13	8.134e-12
ENSMUSG00000027470	Mylk2	22.541	15.5841	29.4978	1.89281	0.920533	0.147062	0.324074
ENSMUSG00000048416	Mlf1	20643	14276.5	27009.5	1.89189	0.91983	1.16012e-19	3.65835e-18
ENSMUSG00000016942	Tmprss6	13.3289	9.21896	17.4388	1.89163	0.919627	0.197672	0.400411
ENSMUSG00000087202	Gm15813	2.05137	1.41921	2.68352	1.89085	0.919036	0.577151	0.795506
ENSMUSG00000045378	Pxt1	1.53727	1.0637	2.01083	1.8904	0.918693	0.743581	0.910058
ENSMUSG00000094245		11.799	8.16613	15.4318	1.88974	0.918186	0.170057	0.359943
ENSMUSG00000020814	Mxra7	2699.06	1868.33	3529.79	1.88927	0.917829	2.34209e-16	6.02556e-15
ENSMUSG00000085719	4933424L21Rik	1.13236	0.784102	1.48061	1.88829	0.91708	0.680798	0.870882
ENSMUSG00000080193	Gm14756	2.04945	1.41921	2.67968	1.88814	0.916968	1	1
ENSMUSG00000081151	Gm11448	10.5706	7.31999	13.8211	1.88814	0.916963	0.289007	0.5201
ENSMUSG00000030854	Ptpn5	1.33385	0.923903	1.7438	1.88743	0.91642	1	1
ENSMUSG00000013091	Tmem190	8.00055	5.54173	10.4594	1.88738	0.916388	0.483867	0.720716
ENSMUSG00000065544	Mir32	4.7214	3.27169	6.17112	1.88621	0.915494	0.509668	0.74208
ENSMUSG00000086620	Gm14157	1.95125	1.35249	2.55001	1.88541	0.914879	0.70442	0.886131
[truncated: 20,111 more rows]
