# Supplementary material for: Complete cardiac regeneration in a mouse model of myocardial infarction
Source: Aging (Albany NY). 2012 Dec 31;4(12):966–77. doi: 10.18632/aging.100526 (PMC3615162; doi:10.18632/aging.100526)
Supplement: Supplementary file 6 [file aging-04-966-s006.xlsx]

## Sheet: day10vsSHAM
Transcript ID	MGI gene symbol	Mean expression	Mean expression P10	Mean expression Sham	Fold change Sham/P10	log2 fold change Sham/P10	p value	p value adjusted *
ENSMUSG00000040026	Saa3	1.81052	0	3.62103	Inf	Inf	0.0290441	0.168626
ENSMUSG00000095224		1.57926	0	3.15851	Inf	Inf	0.053435	0.257038
ENSMUSG00000084031	Gm7416	1.54644	0	3.09288	Inf	Inf	0.0548206	0.261377
ENSMUSG00000048003	Catsper4	1.48264	0	2.96528	Inf	Inf	0.0577082	0.270826
ENSMUSG00000020096	Tbata	1.3825	0	2.765	Inf	Inf	0.0772553	0.326292
ENSMUSG00000064606		1.32934	0	2.65867	Inf	Inf	0.100135	0.382274
ENSMUSG00000041468	Gpr12	1.23539	0	2.47077	Inf	Inf	0.107424	0.398837
ENSMUSG00000053550	Shisa7	1.19108	0	2.38215	Inf	Inf	0.11125	0.407709
ENSMUSG00000085021	Gm12051	1.14058	0	2.28116	Inf	Inf	0.143666	0.47395
ENSMUSG00000080940	Gm15145	1.06612	0	2.13223	Inf	Inf	0.151921	0.490554
ENSMUSG00000089800	Rps19-ps10	1.06612	0	2.13223	Inf	Inf	0.151921	0.490554
ENSMUSG00000095290		1.06078	0	2.12157	Inf	Inf	0.152552	0.490954
ENSMUSG00000080999	Gm11336	1.04396	0	2.08792	Inf	Inf	0.154582	0.494342
ENSMUSG00000031710	Ucp1	1.02181	0	2.04361	Inf	Inf	0.157347	0.498638
ENSMUSG00000030472	Ceacam18	0.965976	0	1.93195	Inf	Inf	0.203889	0.57807
ENSMUSG00000022759	4930451C15Rik	0.946488	0	1.89298	Inf	Inf	0.206801	0.581932
ENSMUSG00000087527	Gm13656	0.946488	0	1.89298	Inf	Inf	0.206801	0.581932
ENSMUSG00000083473	Gm13207	0.924333	0	1.84867	Inf	Inf	0.210237	0.587451
ENSMUSG00000086911	Gm12027	0.924333	0	1.84867	Inf	Inf	0.210237	0.587451
ENSMUSG00000030178	Klra13-ps	0.921667	0	1.84333	Inf	Inf	0.21066	0.588335
ENSMUSG00000038026	Kcnj9	0.921667	0	1.84333	Inf	Inf	0.21066	0.588335
ENSMUSG00000065824		0.921667	0	1.84333	Inf	Inf	0.21066	0.588335
ENSMUSG00000090263	D730045A05Rik	0.919001	0	1.838	Inf	Inf	0.211085	0.589151
ENSMUSG00000049173	Myoz3	0.896847	0	1.79369	Inf	Inf	0.214697	0.594738
ENSMUSG00000091318	Gm5415	0.88269	0	1.76538	Inf	Inf	0.217084	0.597767
ENSMUSG00000019146	Cacng2	0.880024	0	1.76005	Inf	Inf	0.217541	0.59806
ENSMUSG00000093012		0.824193	0	1.64839	Inf	Inf	0.282501	0.681008
ENSMUSG00000090925	1810064F22Rik	0.802039	0	1.60408	Inf	Inf	0.286868	0.686384
ENSMUSG00000029522	Pla2g1b	0.777218	0	1.55444	Inf	Inf	0.29199	0.692521
ENSMUSG00000045502	Niacr1	0.777218	0	1.55444	Inf	Inf	0.29199	0.692521
ENSMUSG00000096764		0.777218	0	1.55444	Inf	Inf	0.29199	0.692521
ENSMUSG00000064496		0.774552	0	1.5491	Inf	Inf	0.292555	0.692842
ENSMUSG00000085097	Gm13049	0.774552	0	1.5491	Inf	Inf	0.292555	0.692842
ENSMUSG00000004842	Pou1f1	0.771886	0	1.54377	Inf	Inf	0.293124	0.693045
ENSMUSG00000022900	Ildr1	0.771886	0	1.54377	Inf	Inf	0.293124	0.693045
ENSMUSG00000078582	Hivep3	0.75773	0	1.51546	Inf	Inf	0.296193	0.696955
ENSMUSG00000046750	BC089491	0.755064	0	1.51013	Inf	Inf	0.29678	0.69713
ENSMUSG00000064765		0.755064	0	1.51013	Inf	Inf	0.29678	0.69713
ENSMUSG00000082779	Gm13162	0.755064	0	1.51013	Inf	Inf	0.29678	0.69713
ENSMUSG00000094359		0.752398	0	1.5048	Inf	Inf	0.297371	0.697568
ENSMUSG00000085053	Gm14809	0.749732	0	1.49946	Inf	Inf	0.297966	0.698014
ENSMUSG00000085536	Gm14950	0.749732	0	1.49946	Inf	Inf	0.297966	0.698014
ENSMUSG00000091594	Gm17067	0.749732	0	1.49946	Inf	Inf	0.297966	0.698014
ENSMUSG00000093346		0.732909	0	1.46582	Inf	Inf	0.301791	0.703111
ENSMUSG00000026573	Xcl1	0.730243	0	1.46049	Inf	Inf	0.30241	0.703415
ENSMUSG00000050844	1700020N01Rik	0.727577	0	1.45515	Inf	Inf	0.303032	0.704038
ENSMUSG00000092737		0.727577	0	1.45515	Inf	Inf	0.303032	0.704038
ENSMUSG00000080708	Ccnd3-ps	0.724911	0	1.44982	Inf	Inf	0.303657	0.70457
ENSMUSG00000058665	En1	0.677078	0	1.35416	Inf	Inf	0.39287	0.79373
ENSMUSG00000026253	Chrng	0.654924	0	1.30985	Inf	Inf	0.398512	0.798285
ENSMUSG00000037101	Ttc29	0.654924	0	1.30985	Inf	Inf	0.398512	0.798285
ENSMUSG00000035582	Gdpd4	0.652258	0	1.30452	Inf	Inf	0.399209	0.799032
ENSMUSG00000071089	Trim75	0.632769	0	1.26554	Inf	Inf	0.404433	0.803824
ENSMUSG00000079710	Gm3417	0.630103	0	1.26021	Inf	Inf	0.405166	0.803899
ENSMUSG00000090852	Tnfrsf22	0.630103	0	1.26021	Inf	Inf	0.405166	0.803899
ENSMUSG00000096275		0.630103	0	1.26021	Inf	Inf	0.405166	0.803899
ENSMUSG00000040533	Matn1	0.627437	0	1.25487	Inf	Inf	0.405903	0.804178
ENSMUSG00000057710	9630041A04Rik	0.627437	0	1.25487	Inf	Inf	0.405903	0.804178
ENSMUSG00000074805	Gm14047	0.627437	0	1.25487	Inf	Inf	0.405903	0.804178
ENSMUSG00000086117	Gm12065	0.627437	0	1.25487	Inf	Inf	0.405903	0.804178
ENSMUSG00000087056	Gm14004	0.627437	0	1.25487	Inf	Inf	0.405903	0.804178
ENSMUSG00000094446	Gm6344	0.627437	0	1.25487	Inf	Inf	0.405903	0.804178
ENSMUSG00000036422	Pcdh8	0.610615	0	1.22123	Inf	Inf	0.410655	0.807877
ENSMUSG00000038756	Ttll6	0.610615	0	1.22123	Inf	Inf	0.410655	0.807877
ENSMUSG00000065270		0.610615	0	1.22123	Inf	Inf	0.410655	0.807877
ENSMUSG00000067144	Slc22a7	0.610615	0	1.22123	Inf	Inf	0.410655	0.807877
ENSMUSG00000041237	Pklr	0.607949	0	1.2159	Inf	Inf	0.411425	0.808458
ENSMUSG00000048185	Gm7075	0.607949	0	1.2159	Inf	Inf	0.411425	0.808458
ENSMUSG00000069712	4930444G20Rik	0.607949	0	1.2159	Inf	Inf	0.411425	0.808458
ENSMUSG00000074224	4932431P20Rik	0.605283	0	1.21057	Inf	Inf	0.4122	0.808458
ENSMUSG00000087378	Gm12414	0.605283	0	1.21057	Inf	Inf	0.4122	0.808458
ENSMUSG00000087861		0.605283	0	1.21057	Inf	Inf	0.4122	0.808458
ENSMUSG00000088205		0.605283	0	1.21057	Inf	Inf	0.4122	0.808458
ENSMUSG00000092276	1700116B05Rik	0.605283	0	1.21057	Inf	Inf	0.4122	0.808458
ENSMUSG00000096474		0.605283	0	1.21057	Inf	Inf	0.4122	0.808458
ENSMUSG00000066626	Gm5121	0.602617	0	1.20523	Inf	Inf	0.41298	0.808842
ENSMUSG00000079638	Rhox2b	0.602617	0	1.20523	Inf	Inf	0.41298	0.808842
ENSMUSG00000084905	Gm12081	0.602617	0	1.20523	Inf	Inf	0.41298	0.808842
ENSMUSG00000079356	Mettl4-ps1	0.58846	0	1.17692	Inf	Inf	0.417201	0.812916
ENSMUSG00000000159	Igsf5	0.585794	0	1.17159	Inf	Inf	0.418012	0.813449
ENSMUSG00000061843	Vmn1r-ps32	0.585794	0	1.17159	Inf	Inf	0.418012	0.813449
ENSMUSG00000083783	Gm12739	0.585794	0	1.17159	Inf	Inf	0.418012	0.813449
ENSMUSG00000065049		0.583128	0	1.16626	Inf	Inf	0.418827	0.813449
ENSMUSG00000089987	Gpx2-ps1	0.583128	0	1.16626	Inf	Inf	0.418827	0.813449
ENSMUSG00000084190	Gm11869	0.580462	0	1.16092	Inf	Inf	0.419648	0.814346
ENSMUSG00000051879	Krt71	0.577796	0	1.15559	Inf	Inf	0.420475	0.815164
ENSMUSG00000058626	Capn11	88.6371	4.66666	172.608	36.9874	5.20896	4.29319e-57	1.18927e-53
ENSMUSG00000087113	Gm11714	1.78298	0.207163	3.35879	16.2133	4.01911	0.107833	0.399747
ENSMUSG00000082185	Gm12428	2.58858	0.313579	4.86359	15.5099	3.95512	0.0254518	0.154067
ENSMUSG00000022097	Sftpc	1.60304	0.207163	2.99893	14.4762	3.85561	0.143958	0.474456
ENSMUSG00000089708	5330439A09Rik	1.5109	0.207163	2.81464	13.5866	3.76412	0.183344	0.545149
ENSMUSG00000023987	Pgc	1.36379	0.207163	2.52041	12.1663	3.60482	0.239136	0.627603
ENSMUSG00000047990	C2cd4a	1.34163	0.207163	2.4761	11.9525	3.57924	0.241468	0.630067
ENSMUSG00000094809	Gm20435	1.34163	0.207163	2.4761	11.9525	3.57924	0.241468	0.630067
ENSMUSG00000027737	Slc7a11	94.783	14.6683	174.898	11.9235	3.57574	5.07469e-41	7.49735e-38
ENSMUSG00000094143		1.3363	0.207163	2.46544	11.901	3.57301	0.242038	0.630664
ENSMUSG00000093779	Gm20648	1.31948	0.207163	2.43179	11.7386	3.55319	0.243859	0.633028
ENSMUSG00000083028	Gm14604	1.31681	0.207163	2.42646	11.7128	3.55002	0.244151	0.633489
ENSMUSG00000075908		1.29199	0.207163	2.37682	11.4732	3.5202	0.246913	0.636408
ENSMUSG00000032530	Lyzl4	2.56097	0.414325	4.70762	11.3621	3.50616	0.0713471	0.310993
ENSMUSG00000065919		1.83352	0.313579	3.35346	10.6942	3.41875	0.105046	0.393182
ENSMUSG00000089260	Mir1929	1.17236	0.207163	2.13756	10.3183	3.36713	0.316152	0.718441
ENSMUSG00000088158	Scarna3b	1.1697	0.207163	2.13223	10.2926	3.36353	0.316498	0.718933
ENSMUSG00000080791	Gm11442	1.14754	0.207163	2.08792	10.0787	3.33323	0.319419	0.722015
ENSMUSG00000087079	Gm13389	1.14754	0.207163	2.08792	10.0787	3.33323	0.319419	0.722015
ENSMUSG00000092851		1.07222	0.207163	1.93728	9.35152	3.2252	0.40095	0.800369
ENSMUSG00000092837		65.951	12.7982	119.104	9.3063	3.21821	2.2065e-26	1.2868e-23
ENSMUSG00000030972	Acsm5	1.05007	0.207163	1.89298	9.13763	3.19182	0.404086	0.803495
ENSMUSG00000092545	Gm20319	1.58627	0.313579	2.85895	9.11718	3.18859	0.177143	0.534105
ENSMUSG00000026523	Wdr64	1.0474	0.207163	1.88764	9.11189	3.18775	0.404469	0.803824
ENSMUSG00000033061	Resp18	1.0474	0.207163	1.88764	9.11189	3.18775	0.404469	0.803824
ENSMUSG00000093787	Gm20677	1.0474	0.207163	1.88764	9.11189	3.18775	0.404469	0.803824
ENSMUSG00000093394	Gm20621	1.03058	0.207163	1.854	8.94948	3.1618	0.406918	0.805224
ENSMUSG00000006179	Prss16	1.55878	0.313579	2.80398	8.94187	3.16058	0.179347	0.537823
ENSMUSG00000075025	Gm10804	1.02525	0.207163	1.84333	8.89801	3.15348	0.407705	0.805559
ENSMUSG00000083176	D11Bhm181e	1.02525	0.207163	1.84333	8.89801	3.15348	0.407705	0.805559
ENSMUSG00000092246	Gm20493	1.02525	0.207163	1.84333	8.89801	3.15348	0.407705	0.805559
ENSMUSG00000078626	Gm12790	1.02258	0.207163	1.838	8.87227	3.1493	0.408101	0.805722
ENSMUSG00000085495	Gm16796	1.02258	0.207163	1.838	8.87227	3.1493	0.408101	0.805722
ENSMUSG00000087200	Gm12908	1.02258	0.207163	1.838	8.87227	3.1493	0.408101	0.805722
ENSMUSG00000087181	Gm13570	1.00843	0.207163	1.80969	8.7356	3.12691	0.410224	0.807656
ENSMUSG00000054046	Klk13	1.00309	0.207163	1.79903	8.68412	3.11838	0.411034	0.808174
ENSMUSG00000085920	Gm12951	1.00043	0.207163	1.79369	8.65838	3.1141	0.411442	0.808458
ENSMUSG00000029813	1600015I10Rik	5.02894	1.04148	9.01639	8.65727	3.11391	0.00768217	0.063522
ENSMUSG00000071719	Tmem28	0.997762	0.207163	1.78836	8.63264	3.1098	0.41185	0.808458
ENSMUSG00000080542		0.997762	0.207163	1.78836	8.63264	3.1098	0.41185	0.808458
ENSMUSG00000047021	Ccdc108	1.48965	0.313579	2.66572	8.50096	3.08763	0.185185	0.547905
ENSMUSG00000020061	Mybpc1	15.365	3.31726	27.4127	8.26366	3.04678	1.61073e-06	6.11224e-05
ENSMUSG00000090099	Gm8837	1.43915	0.313579	2.56472	8.17888	3.0319	0.231621	0.617837
ENSMUSG00000033196	Myh2	7.16372	1.56222	12.7652	8.17118	3.03054	0.00259189	0.0281576
ENSMUSG00000001661	Hoxc6	0.949929	0.207163	1.6927	8.17086	3.03049	0.511665	0.882893
ENSMUSG00000086637	Gm14040	1.41966	0.313579	2.52575	8.05458	3.00981	0.233505	0.620171
ENSMUSG00000027776	Il12a	2.81984	0.627157	5.01251	7.99243	2.99863	0.0528556	0.255248
ENSMUSG00000089972	Gm16318	0.927775	0.207163	1.64839	7.95697	2.99222	0.514909	0.885389
ENSMUSG00000079143	Gm11052	0.925109	0.207163	1.64305	7.93123	2.98754	0.515306	0.88547
ENSMUSG00000086928	Gm14210	1.37269	0.313579	2.43179	7.75497	2.95512	0.238215	0.625878
ENSMUSG00000023333	Gcm1	0.90562	0.207163	1.60408	7.74308	2.95291	0.518252	0.886621
ENSMUSG00000076522	Igkv16-104	1.36735	0.313579	2.42113	7.72097	2.94878	0.238766	0.62691
ENSMUSG00000050266	Olfr690	0.902954	0.207163	1.59875	7.71735	2.9481	0.518661	0.886621
ENSMUSG00000065851		0.902954	0.207163	1.59875	7.71735	2.9481	0.518661	0.886621
ENSMUSG00000089224		0.883466	0.207163	1.55977	7.5292	2.9125	0.521698	0.888446
ENSMUSG00000046774	8030474K03Rik	14.2195	3.34295	25.0961	7.50719	2.90827	4.17979e-06	0.000133663
ENSMUSG00000086025	4933406G16Rik	0.8808	0.207163	1.55444	7.50346	2.90756	0.52212	0.888686
ENSMUSG00000086256	Gm12052	1.73944	0.414325	3.06456	7.39652	2.88685	0.245306	0.634711
ENSMUSG00000081433	Serpinb1-ps1	0.861311	0.207163	1.51546	7.31531	2.87092	0.525252	0.891279
ENSMUSG00000050526	4933406M09Rik	1.71729	0.414325	3.02026	7.28957	2.86583	0.24705	0.63654
ENSMUSG00000081078	Gm12568	0.855979	0.207163	1.5048	7.26384	2.86073	0.526124	0.891782
ENSMUSG00000081968	Rpl23a-ps2	0.853313	0.207163	1.49946	7.2381	2.85561	0.526563	0.891861
ENSMUSG00000028661	Epha8	1.68714	0.414325	2.95995	7.14402	2.83674	0.249477	0.639462
ENSMUSG00000033849	B3galt2	72.3674	17.9064	126.829	7.08288	2.82434	2.21778e-23	1.00302e-20
ENSMUSG00000091289	Gm17051	0.833824	0.207163	1.46049	7.04995	2.81761	0.52982	0.893799
ENSMUSG00000085817	Gm12668	0.831158	0.207163	1.45515	7.02421	2.81234	0.530273	0.893913
ENSMUSG00000089407		0.831158	0.207163	1.45515	7.02421	2.81234	0.530273	0.893913
ENSMUSG00000025014	Dntt	1.65698	0.414325	2.89964	6.99847	2.80704	0.251968	0.642839
ENSMUSG00000070594	Gm4788	1.25306	0.313579	2.19254	6.99199	2.8057	0.306177	0.707601
ENSMUSG00000068113	Gm4907	1.22824	0.313579	2.1429	6.83368	2.77266	0.309145	0.711492
ENSMUSG00000033981	Gria2	1.20608	0.313579	2.09859	6.69238	2.74252	0.311867	0.714198
ENSMUSG00000086458	Gm2639	1.20608	0.313579	2.09859	6.69238	2.74252	0.311867	0.714198
ENSMUSG00000094377		1.20608	0.313579	2.09859	6.69238	2.74252	0.311867	0.714198
ENSMUSG00000086312	Gm15336	1.20342	0.313579	2.09326	6.67538	2.73885	0.3122	0.714221
ENSMUSG00000087784		1.20075	0.313579	2.08792	6.65837	2.73517	0.312533	0.714616
ENSMUSG00000093962	Gm11756	1.95926	0.520741	3.39777	6.52487	2.70595	0.189873	0.554968
ENSMUSG00000088088		8.56455	2.29013	14.839	6.47954	2.69589	0.0016953	0.0203188
ENSMUSG00000083603	Gm14810	1.54269	0.414325	2.67105	6.44675	2.68857	0.312118	0.714221
ENSMUSG00000056257	Gm5447	2.33152	0.627157	4.03587	6.43518	2.68598	0.114149	0.414629
ENSMUSG00000019893	Ros1	0.758505	0.207163	1.30985	6.3228	2.66056	0.660884	0.959319
ENSMUSG00000064310	Zpld1	0.758505	0.207163	1.30985	6.3228	2.66056	0.660884	0.959319
ENSMUSG00000078528	Gm17068	0.758505	0.207163	1.30985	6.3228	2.66056	0.660884	0.959319
ENSMUSG00000083195	Gm13567	0.758505	0.207163	1.30985	6.3228	2.66056	0.660884	0.959319
ENSMUSG00000086686	F630206G17Rik	2.29603	0.627157	3.9649	6.32202	2.66039	0.115675	0.417627
ENSMUSG00000067001	Serpinb7	0.755839	0.207163	1.30452	6.29706	2.65468	0.661271	0.959319
ENSMUSG00000084218	Gm8145	1.49219	0.414325	2.57005	6.20299	2.63296	0.379341	0.781068
ENSMUSG00000083696	Gm12563	1.1281	0.313579	1.94262	6.19499	2.6311	0.393415	0.794104
ENSMUSG00000074472	Zfp872	2.60699	0.727904	4.48607	6.163	2.62363	0.124523	0.436154
ENSMUSG00000030244	Gys2	0.736351	0.207163	1.26554	6.10891	2.61092	0.66415	0.960665
ENSMUSG00000040163	1700034J05Rik	0.736351	0.207163	1.26554	6.10891	2.61092	0.66415	0.960665
ENSMUSG00000081056	Gm13998	0.736351	0.207163	1.26554	6.10891	2.61092	0.66415	0.960665
ENSMUSG00000084474		0.736351	0.207163	1.26554	6.10891	2.61092	0.66415	0.960665
ENSMUSG00000092202	Stk19-ps1	0.736351	0.207163	1.26554	6.10891	2.61092	0.66415	0.960665
ENSMUSG00000000214	Th	0.733685	0.207163	1.26021	6.08317	2.60482	0.664551	0.960665
ENSMUSG00000031919	Tmed6	0.733685	0.207163	1.26021	6.08317	2.60482	0.664551	0.960665
ENSMUSG00000081988	Gm15746	0.733685	0.207163	1.26021	6.08317	2.60482	0.664551	0.960665
ENSMUSG00000085739	Gm15862	0.733685	0.207163	1.26021	6.08317	2.60482	0.664551	0.960665
ENSMUSG00000084858	Gm1980	1.83963	0.520741	3.15851	6.06542	2.60061	0.237808	0.625451
ENSMUSG00000054746	Abca15	0.731018	0.207163	1.25487	6.05744	2.59871	0.664954	0.960753
ENSMUSG00000089253		0.731018	0.207163	1.25487	6.05744	2.59871	0.664954	0.960753
ENSMUSG00000090117	Gm16541	1.10594	0.313579	1.89831	6.05369	2.59781	0.396341	0.796555
ENSMUSG00000080538		1.10061	0.313579	1.88764	6.01968	2.58969	0.397057	0.797173
ENSMUSG00000043843	Tmem145	1.44521	0.414325	2.4761	5.97623	2.57924	0.383755	0.78577
ENSMUSG00000065037		132.845	38.3949	227.295	5.91993	2.56558	3.80051e-33	3.5093e-30
ENSMUSG00000070465	Gm9696	1.08112	0.313579	1.84867	5.89538	2.55959	0.399715	0.799467
ENSMUSG00000087925		0.714196	0.207163	1.22123	5.89503	2.5595	0.667533	0.961881
ENSMUSG00000088372		0.714196	0.207163	1.22123	5.89503	2.5595	0.667533	0.961881
ENSMUSG00000055826	1700008P20Rik	1.07846	0.313579	1.84333	5.87838	2.55542	0.400084	0.799833
ENSMUSG00000064422		1.07846	0.313579	1.84333	5.87838	2.55542	0.400084	0.799833
ENSMUSG00000021416	Eci3	2.13459	0.621488	3.64769	5.86929	2.55319	0.239281	0.627909
ENSMUSG00000011034	Slc5a1	0.71153	0.207163	1.2159	5.86929	2.55319	0.667948	0.961881
ENSMUSG00000065158		0.71153	0.207163	1.2159	5.86929	2.55319	0.667948	0.961881
ENSMUSG00000081997	Gm11886	0.71153	0.207163	1.2159	5.86929	2.55319	0.667948	0.961881
ENSMUSG00000090192	Gm16556	0.71153	0.207163	1.2159	5.86929	2.55319	0.667948	0.961881
ENSMUSG00000090460	Gm17511	0.71153	0.207163	1.2159	5.86929	2.55319	0.667948	0.961881
ENSMUSG00000095343		1.42039	0.414325	2.42646	5.85642	2.55002	0.386162	0.787843
ENSMUSG00000082529	Gm11199	0.708864	0.207163	1.21057	5.84355	2.54685	0.668365	0.961919
ENSMUSG00000089701	Gm15978	0.708864	0.207163	1.21057	5.84355	2.54685	0.668365	0.961919
ENSMUSG00000092738	Mir5135	0.708864	0.207163	1.21057	5.84355	2.54685	0.668365	0.961919
ENSMUSG00000081798	Gm8152	1.76517	0.520741	3.00959	5.77944	2.53093	0.243321	0.632411
ENSMUSG00000056008	Gm11541	2.10444	0.621488	3.58739	5.77226	2.52914	0.241117	0.629894
ENSMUSG00000082315	Gm16523	0.689375	0.207163	1.17159	5.6554	2.49963	0.671468	0.962659
ENSMUSG00000089695	Gm15946	0.689375	0.207163	1.17159	5.6554	2.49963	0.671468	0.962659
ENSMUSG00000028176	Lrrc7	0.686709	0.207163	1.16626	5.62966	2.49305	0.6719	0.962659
ENSMUSG00000084816	Gm11463	0.686709	0.207163	1.16626	5.62966	2.49305	0.6719	0.962659
ENSMUSG00000086874	Gm13175	0.686709	0.207163	1.16626	5.62966	2.49305	0.6719	0.962659
ENSMUSG00000092349	BC033916	0.686709	0.207163	1.16626	5.62966	2.49305	0.6719	0.962659
ENSMUSG00000027556	Car1	0.684043	0.207163	1.16092	5.60393	2.48644	0.672334	0.962659
ENSMUSG00000065476	Mir30b	0.684043	0.207163	1.16092	5.60393	2.48644	0.672334	0.962659
ENSMUSG00000089746	Gm3513	0.684043	0.207163	1.16092	5.60393	2.48644	0.672334	0.962659
ENSMUSG00000089214	Mir1931	1.36542	0.414325	2.31652	5.59106	2.48312	0.391688	0.793355
ENSMUSG00000086986	Gm12103	2.72666	0.83432	4.619	5.53625	2.46891	0.120006	0.426402
ENSMUSG00000091269	Gm6682	10.3679	3.22219	17.5137	5.43535	2.44237	0.000203269	0.0036416
ENSMUSG00000087492	Gm15700	2.01513	0.627157	3.4031	5.42623	2.43995	0.1864	0.549749
ENSMUSG00000086899	1600002D24Rik	2.0098	0.627157	3.39244	5.40923	2.43542	0.186725	0.549909
ENSMUSG00000073823	Gm10586	1.32025	0.414325	2.22618	5.37303	2.42574	0.473634	0.858866
ENSMUSG00000051596	Otop1	1.2981	0.414325	2.18187	5.26609	2.39673	0.47581	0.86025
ENSMUSG00000083953	Gm14049	1.27328	0.414325	2.13223	5.14628	2.36353	0.478302	0.861549
ENSMUSG00000074673	Ttll9	1.59056	0.520741	2.66039	5.10885	2.353	0.30781	0.709778
ENSMUSG00000076587	Igkv6-20	0.956162	0.313579	1.59875	5.09839	2.35004	0.510769	0.882241
ENSMUSG00000085888	Gm12224	1.25379	0.414325	2.09326	5.0522	2.33691	0.480299	0.862372
ENSMUSG00000030092	Cntn6	2.17713	0.727904	3.62636	4.98193	2.3167	0.236753	0.624233
ENSMUSG00000046372	Gm5590	0.934008	0.313579	1.55444	4.95709	2.30949	0.513986	0.884786
ENSMUSG00000073623	5830472F04Rik	0.934008	0.313579	1.55444	4.95709	2.30949	0.513986	0.884786
ENSMUSG00000082715	Gm11633	0.934008	0.313579	1.55444	4.95709	2.30949	0.513986	0.884786
ENSMUSG00000085651	Gm11695	0.934008	0.313579	1.55444	4.95709	2.30949	0.513986	0.884786
ENSMUSG00000083009	Gm1335	0.931342	0.313579	1.5491	4.94008	2.30453	0.51438	0.885003
ENSMUSG00000055015	Gm9961	2.74955	0.935067	4.56403	4.88096	2.28717	0.185519	0.548026
ENSMUSG00000082964	Rpl13-ps5	2.42426	0.828651	4.01988	4.85111	2.27832	0.275293	0.671003
ENSMUSG00000081473	Gm4853	1.52058	0.520741	2.52041	4.84005	2.27502	0.376761	0.778716
ENSMUSG00000083245	Gm11185	2.72473	0.935067	4.51439	4.82788	2.27139	0.186567	0.549801
ENSMUSG00000095538		0.911853	0.313579	1.51013	4.81578	2.26777	0.517301	0.886453
ENSMUSG00000045010	Gm4779	17.8924	6.15648	29.6282	4.81253	2.2668	3.60096e-06	0.000119984
ENSMUSG00000095061		2.40744	0.828651	3.98623	4.81051	2.26619	0.276161	0.672306
ENSMUSG00000061272	Gm14173	0.906521	0.313579	1.49946	4.78178	2.25755	0.518114	0.886621
ENSMUSG00000087334	AW495222	0.903855	0.313579	1.49413	4.76477	2.25241	0.518522	0.886621
ENSMUSG00000084085	Gm16140	1.49576	0.520741	2.47077	4.74472	2.24632	0.379014	0.780897
ENSMUSG00000085944	1700003D09Rik	1.17847	0.414325	1.94262	4.68863	2.22917	0.583492	0.922308
ENSMUSG00000000435	Myf5	0.589236	0.207163	0.971309	4.68863	2.22917	0.83875	1
ENSMUSG00000034336	Ina	0.589236	0.207163	0.971309	4.68863	2.22917	0.83875	1
ENSMUSG00000073007	Fam46d	0.589236	0.207163	0.971309	4.68863	2.22917	0.83875	1
ENSMUSG00000081212	Gm6964	0.589236	0.207163	0.971309	4.68863	2.22917	0.83875	1
ENSMUSG00000087654	Gm12256	0.589236	0.207163	0.971309	4.68863	2.22917	0.83875	1
ENSMUSG00000071113	Mboat4	1.17581	0.414325	1.93728	4.67576	2.2252	0.583736	0.922332
ENSMUSG00000087640	Gm14798	0.889699	0.313579	1.46582	4.67448	2.22481	0.520717	0.888141
ENSMUSG00000034107	Ano7	1.47627	0.520741	2.43179	4.66987	2.22338	0.380817	0.782274
ENSMUSG00000032937	Fshr	0.58657	0.207163	0.965976	4.66289	2.22122	0.839016	1
ENSMUSG00000035435	Abca17	0.58657	0.207163	0.965976	4.66289	2.22122	0.839016	1
ENSMUSG00000054123	Gm9936	0.58657	0.207163	0.965976	4.66289	2.22122	0.839016	1
ENSMUSG00000085368	Gm16188	0.58657	0.207163	0.965976	4.66289	2.22122	0.839016	1
ENSMUSG00000088056		0.58657	0.207163	0.965976	4.66289	2.22122	0.839016	1
ENSMUSG00000090468	Gm5331	0.58657	0.207163	0.965976	4.66289	2.22122	0.839016	1
ENSMUSG00000096192		0.58657	0.207163	0.965976	4.66289	2.22122	0.839016	1
ENSMUSG00000066072	Cyp4a10	0.887033	0.313579	1.46049	4.65748	2.21955	0.521136	0.888425
ENSMUSG00000078183	Gm15610	0.884366	0.313579	1.45515	4.64048	2.21427	0.521555	0.888446
ENSMUSG00000017300	Tnnc2	1.76521	0.627157	2.90326	4.62924	2.21077	0.293491	0.693395
ENSMUSG00000026251	Chrnd	2.03374	0.7264	3.34108	4.59951	2.20148	0.118347	0.423286
ENSMUSG00000075707	Dio3	2.91356	1.04148	4.78564	4.59502	2.20007	0.151148	0.488778
ENSMUSG00000005364	Il5ra	1.45678	0.520741	2.39282	4.59502	2.20007	0.382651	0.784278
ENSMUSG00000082429	Gm13171	1.15365	0.414325	1.89298	4.56882	2.19182	0.585793	0.923639
ENSMUSG00000069873	4930438A08Rik	1.13416	0.414325	1.854	4.47474	2.1618	0.587639	0.924756
ENSMUSG00000000938	Hoxa10	0.567081	0.207163	0.926999	4.47474	2.1618	0.841009	1
ENSMUSG00000069581	C330046G03Rik	0.567081	0.207163	0.926999	4.47474	2.1618	0.841009	1
ENSMUSG00000079722	Ttll2	0.567081	0.207163	0.926999	4.47474	2.1618	0.841009	1
ENSMUSG00000081330	Gm13013	0.567081	0.207163	0.926999	4.47474	2.1618	0.841009	1
ENSMUSG00000084104	Gm13578	0.567081	0.207163	0.926999	4.47474	2.1618	0.841009	1
ENSMUSG00000096440	Vmn2r-ps20	0.567081	0.207163	0.926999	4.47474	2.1618	0.841009	1
ENSMUSG00000063328	Gm9396	1.12883	0.414325	1.84333	4.449	2.15348	0.58815	0.924922
ENSMUSG00000021997	Lrrc63	0.564415	0.207163	0.921667	4.449	2.15348	0.841287	1
ENSMUSG00000034224	Slc38a8	0.564415	0.207163	0.921667	4.449	2.15348	0.841287	1
ENSMUSG00000048031	Fcrl5	0.564415	0.207163	0.921667	4.449	2.15348	0.841287	1
ENSMUSG00000065408	Mir31	0.564415	0.207163	0.921667	4.449	2.15348	0.841287	1
ENSMUSG00000068428	Gm606	0.564415	0.207163	0.921667	4.449	2.15348	0.841287	1
ENSMUSG00000081807	Gm14849	0.564415	0.207163	0.921667	4.449	2.15348	0.841287	1
ENSMUSG00000082132	Gm13541	0.564415	0.207163	0.921667	4.449	2.15348	0.841287	1
ENSMUSG00000083623	Gm7224	0.564415	0.207163	0.921667	4.449	2.15348	0.841287	1
ENSMUSG00000088071		0.564415	0.207163	0.921667	4.449	2.15348	0.841287	1
ENSMUSG00000092785		0.564415	0.207163	0.921667	4.449	2.15348	0.841287	1
ENSMUSG00000086125	Gm15942	1.12616	0.414325	1.838	4.43613	2.1493	0.588407	0.92493
ENSMUSG00000004654	Ghrhr	0.561749	0.207163	0.916335	4.42326	2.14511	0.841567	1
ENSMUSG00000028185	Dnase2b	0.561749	0.207163	0.916335	4.42326	2.14511	0.841567	1
ENSMUSG00000029679	Hyal6	0.561749	0.207163	0.916335	4.42326	2.14511	0.841567	1
ENSMUSG00000058728	Cd300c	0.561749	0.207163	0.916335	4.42326	2.14511	0.841567	1
ENSMUSG00000065440	Mirlet7g	0.561749	0.207163	0.916335	4.42326	2.14511	0.841567	1
ENSMUSG00000076462	Trbv2	0.561749	0.207163	0.916335	4.42326	2.14511	0.841567	1
ENSMUSG00000081677	Mdk-ps1	0.561749	0.207163	0.916335	4.42326	2.14511	0.841567	1
ENSMUSG00000089702	Gm16568	1.69875	0.627157	2.77033	4.41729	2.14316	0.298698	0.698913
ENSMUSG00000090256	Alms1-ps1	2.25516	0.83432	3.676	4.40599	2.13947	0.232294	0.618365
ENSMUSG00000093429	Vmn1r-ps145	1.67376	0.621488	2.72602	4.38629	2.133	0.437473	0.828069
ENSMUSG00000075330	A930003A15Rik	1.67126	0.627157	2.71536	4.32963	2.11424	0.300936	0.701708
ENSMUSG00000020722	Cacng1	5.25171	1.97088	8.53255	4.32931	2.11414	0.101073	0.384749
ENSMUSG00000021609	Slc6a3	1.10401	0.414325	1.79369	4.32919	2.1141	0.590567	0.925177
ENSMUSG00000041565	L3mbtl4	0.833868	0.313579	1.35416	4.3184	2.1105	0.650562	0.955001
ENSMUSG00000022997	Wnt1	1.64094	0.621488	2.66039	4.28067	2.09784	0.439915	0.829487
ENSMUSG00000059562	Ccdc154	1.37346	0.520741	2.22618	4.27503	2.09593	0.468584	0.854112
ENSMUSG00000089617	Scarna10	16.9808	6.45155	27.5101	4.26411	2.09224	2.99477e-05	0.000736593
ENSMUSG00000055403	4933427D06Rik	0.544927	0.207163	0.88269	4.26086	2.09114	0.843368	1
ENSMUSG00000065426	Mir134	0.544927	0.207163	0.88269	4.26086	2.09114	0.843368	1
ENSMUSG00000073574	Grxcr2	0.544927	0.207163	0.88269	4.26086	2.09114	0.843368	1
ENSMUSG00000079666	1700015F17Rik	0.544927	0.207163	0.88269	4.26086	2.09114	0.843368	1
ENSMUSG00000083976	Gm13664	0.544927	0.207163	0.88269	4.26086	2.09114	0.843368	1
ENSMUSG00000026459	Myog	4.36249	1.65996	7.06501	4.25613	2.08954	0.0225034	0.141274
ENSMUSG00000051582	Otud6a	0.54226	0.207163	0.877358	4.23512	2.0824	0.843659	1
ENSMUSG00000065145		0.54226	0.207163	0.877358	4.23512	2.0824	0.843659	1
ENSMUSG00000070225	n-R5s33	0.54226	0.207163	0.877358	4.23512	2.0824	0.843659	1
ENSMUSG00000086054	Gm13824	0.54226	0.207163	0.877358	4.23512	2.0824	0.843659	1
ENSMUSG00000090471	Gm4553	0.54226	0.207163	0.877358	4.23512	2.0824	0.843659	1
ENSMUSG00000095348	Gm3892	0.54226	0.207163	0.877358	4.23512	2.0824	0.843659	1
ENSMUSG00000081418	Gm14830	2.44041	0.933563	3.94725	4.22816	2.08003	0.109716	0.40416
ENSMUSG00000060888	Olfr566	0.539594	0.207163	0.872026	4.20938	2.07361	0.843951	1
ENSMUSG00000065691	n-R5s77	0.539594	0.207163	0.872026	4.20938	2.07361	0.843951	1
ENSMUSG00000069266	Hist1h4b	0.539594	0.207163	0.872026	4.20938	2.07361	0.843951	1
ENSMUSG00000069720	4930572O03Rik	0.539594	0.207163	0.872026	4.20938	2.07361	0.843951	1
ENSMUSG00000081243	Gm14037	0.539594	0.207163	0.872026	4.20938	2.07361	0.843951	1
ENSMUSG00000085120	Gm16086	0.539594	0.207163	0.872026	4.20938	2.07361	0.843951	1
ENSMUSG00000086933	4933426K07Rik	0.539594	0.207163	0.872026	4.20938	2.07361	0.843951	1
ENSMUSG00000089760	D030046N08Rik	0.539594	0.207163	0.872026	4.20938	2.07361	0.843951	1
ENSMUSG00000092600	Gm20442	0.539594	0.207163	0.872026	4.20938	2.07361	0.843951	1
ENSMUSG00000083238	Hspe1-ps4	1.8909	0.727904	3.0539	4.19547	2.06883	0.35542	0.759553
ENSMUSG00000076562	Igkv4-50	0.536928	0.207163	0.866694	4.18364	2.06476	0.844246	1
ENSMUSG00000083521	Gm12157	0.536928	0.207163	0.866694	4.18364	2.06476	0.844246	1
ENSMUSG00000093680		0.536928	0.207163	0.866694	4.18364	2.06476	0.844246	1
ENSMUSG00000087150	BC064078	7.79247	3.01653	12.5684	4.16652	2.05884	0.0123556	0.0910465
ENSMUSG00000085247	4930545L23Rik	2.13803	0.828651	3.44741	4.16027	2.05668	0.397587	0.797457
ENSMUSG00000074004	B3gnt6	4.00069	1.55505	6.44634	4.14542	2.05152	0.076697	0.324497
ENSMUSG00000084624	n-R5s189	2.89935	1.14073	4.65798	4.08335	2.02975	0.114058	0.414367
ENSMUSG00000057047	1700010B08Rik	0.789559	0.313579	1.26554	4.03579	2.01285	0.65649	0.95862
ENSMUSG00000064652		0.789559	0.313579	1.26554	4.03579	2.01285	0.65649	0.95862
ENSMUSG00000088402		0.789559	0.313579	1.26554	4.03579	2.01285	0.65649	0.95862
ENSMUSG00000084809	Gm12631	1.30966	0.520741	2.09859	4.03	2.01078	0.474669	0.859541
ENSMUSG00000096807	Hist1h2bm	1.30966	0.520741	2.09859	4.03	2.01078	0.474669	0.859541
ENSMUSG00000076465	Trbv5	2.08306	0.828651	3.33747	4.02759	2.00992	0.400671	0.800369
ENSMUSG00000096346		1.307	0.520741	2.09326	4.01976	2.00711	0.474931	0.859541
ENSMUSG00000058537	AW822073	0.786893	0.313579	1.26021	4.01879	2.00676	0.656859	0.958746
ENSMUSG00000075245	Gm6043	0.786893	0.313579	1.26021	4.01879	2.00676	0.656859	0.958746
ENSMUSG00000091221	Gm3084	0.784227	0.313579	1.25487	4.00178	2.00064	0.65723	0.958972
ENSMUSG00000020226	Slc5a4b	1.55146	0.621488	2.48144	3.99273	1.99738	0.526152	0.891782
ENSMUSG00000021966	Prss52	1.5488	0.621488	2.4761	3.98415	1.99427	0.526337	0.891861
ENSMUSG00000088758		1.5488	0.621488	2.4761	3.98415	1.99427	0.526337	0.891861
ENSMUSG00000086405	9330198N18Rik	1.54613	0.621488	2.47077	3.97557	1.99116	0.526522	0.891861
ENSMUSG00000063130	Calml3	2.83381	1.1479	4.51972	3.93738	1.97724	0.182066	0.542598
ENSMUSG00000091674	C630004L07Rik	2.56083	1.04148	4.08018	3.91767	1.96999	0.268527	0.66423
ENSMUSG00000059064	Gm10059	0.767404	0.313579	1.22123	3.89449	1.96143	0.659604	0.959319
ENSMUSG00000082498	Gm12937	0.767404	0.313579	1.22123	3.89449	1.96143	0.659604	0.959319
ENSMUSG00000000632	Sez6	14.7643	6.03306	23.4955	3.89446	1.96142	0.000657985	0.0095118
ENSMUSG00000062319	Gm10115	2.53051	1.03581	4.02521	3.88604	1.9583	0.366303	0.770468
ENSMUSG00000080800	Gm11582	0.764738	0.313579	1.2159	3.87749	1.95512	0.659985	0.959319
ENSMUSG00000085281	Gm13316	0.764738	0.313579	1.2159	3.87749	1.95512	0.659985	0.959319
ENSMUSG00000085361	Gm16305	0.764738	0.313579	1.2159	3.87749	1.95512	0.659985	0.959319
ENSMUSG00000096140		0.764738	0.313579	1.2159	3.87749	1.95512	0.659985	0.959319
ENSMUSG00000085861	1700016G14Rik	1.0092	0.414325	1.60408	3.87154	1.95291	0.716169	0.976611
ENSMUSG00000024107	Lhcgr	3.29808	1.35506	5.24111	3.8678	1.95151	0.17335	0.527549
ENSMUSG00000087040	Gm14033	1.77127	0.727904	2.81464	3.86678	1.95113	0.430536	0.823616
ENSMUSG00000070990	Foxe1	4.03633	1.65996	6.41269	3.86316	1.94978	0.0252053	0.153055
ENSMUSG00000058147	Xlr3c	7.07624	2.91162	11.2409	3.86069	1.94886	0.0607804	0.280242
ENSMUSG00000014725	Adam28	0.762072	0.313579	1.21057	3.86048	1.94878	0.660369	0.959319
ENSMUSG00000063548	Gm4825	0.762072	0.313579	1.21057	3.86048	1.94878	0.660369	0.959319
ENSMUSG00000080914	Gm7129	0.762072	0.313579	1.21057	3.86048	1.94878	0.660369	0.959319
ENSMUSG00000083606	Gm15916	0.762072	0.313579	1.21057	3.86048	1.94878	0.660369	0.959319
ENSMUSG00000084215	Gm11814	0.762072	0.313579	1.21057	3.86048	1.94878	0.660369	0.959319
ENSMUSG00000085132	Gm12265	0.762072	0.313579	1.21057	3.86048	1.94878	0.660369	0.959319
ENSMUSG00000094655		0.762072	0.313579	1.21057	3.86048	1.94878	0.660369	0.959319
ENSMUSG00000085842	4930448K12Rik	1.00654	0.414325	1.59875	3.85867	1.9481	0.716367	0.976611
ENSMUSG00000083870	Gm11761	0.759406	0.313579	1.20523	3.84348	1.94241	0.660754	0.959319
ENSMUSG00000083914	Rps18-ps1	0.759406	0.313579	1.20523	3.84348	1.94241	0.660754	0.959319
ENSMUSG00000085744	Gm12259	1.50182	0.621488	2.38215	3.83298	1.93847	0.529655	0.893799
ENSMUSG00000053338	Tarm1	2.25856	0.935067	3.58205	3.8308	1.93765	0.332873	0.736734
ENSMUSG00000058022	9530008L14Rik	2.23374	0.935067	3.53241	3.77771	1.91751	0.334245	0.738673
ENSMUSG00000059305	Vpreb1	4.7051	1.97655	7.43364	3.76092	1.91109	0.125413	0.437898
ENSMUSG00000091998	Gm17072	0.74525	0.313579	1.17692	3.75319	1.90812	0.662825	0.96037
ENSMUSG00000082446	Gm13863	0.742584	0.313579	1.17159	3.73619	1.90157	0.66322	0.960665
ENSMUSG00000067599	Klra7	1.23168	0.520741	1.94262	3.73048	1.89936	0.578741	0.920709
ENSMUSG00000027186	Elf5	1.71897	0.727904	2.71003	3.72306	1.89649	0.434199	0.825593
ENSMUSG00000021940	Ptpn20	2.20806	0.935067	3.48106	3.72279	1.89638	0.39379	0.794355
ENSMUSG00000027355	Tmco5	0.739917	0.313579	1.16626	3.71918	1.89499	0.663617	0.960665
ENSMUSG00000081504	Gm12508	0.739917	0.313579	1.16626	3.71918	1.89499	0.663617	0.960665
ENSMUSG00000020908	Myh3	31.6738	13.5276	49.82	3.68285	1.88082	7.73033e-06	0.000229333
ENSMUSG00000030155	Clec2e	3.65425	1.56222	5.74628	3.67827	1.87903	0.167147	0.516475
ENSMUSG00000079261	Gm15217	1.69681	0.727904	2.66572	3.66219	1.8727	0.435791	0.827014
ENSMUSG00000095010		1.20952	0.520741	1.89831	3.6454	1.86608	0.58069	0.921801
ENSMUSG00000076583	Igkv8-24	0.962226	0.414325	1.51013	3.64479	1.86583	0.719735	0.977452
ENSMUSG00000089115		0.962226	0.414325	1.51013	3.64479	1.86583	0.719735	0.977452
ENSMUSG00000070564	Ntn5	1.20686	0.520741	1.89298	3.63516	1.86202	0.580927	0.921801
ENSMUSG00000080957	Gm15739	1.20686	0.520741	1.89298	3.63516	1.86202	0.580927	0.921801
ENSMUSG00000028972	Car6	0.95956	0.414325	1.5048	3.63192	1.86073	0.719943	0.977533
ENSMUSG00000089995	Gm15716	0.95956	0.414325	1.5048	3.63192	1.86073	0.719943	0.977533
ENSMUSG00000030205	Gprc5d	1.20153	0.520741	1.88231	3.61468	1.85387	0.581403	0.921801
ENSMUSG00000026387	Sctr	2.63155	1.14223	4.12087	3.60775	1.8511	0.310587	0.713107
ENSMUSG00000093559	Gm20705	1.92196	0.83432	3.00959	3.60724	1.85089	0.353314	0.757503
ENSMUSG00000028332	Hemgn	1.4265	0.621488	2.23152	3.5906	1.84423	0.629997	0.944804
ENSMUSG00000020870	Cdc34-ps	2.14085	0.933563	3.34813	3.5864	1.84254	0.179119	0.537455
ENSMUSG00000026894	Morn5	2.1416	0.935067	3.34813	3.58063	1.84021	0.39739	0.797421
ENSMUSG00000082934	Gm13887	0.942738	0.414325	1.47115	3.55071	1.82811	0.72127	0.978216
ENSMUSG00000082962	Gm10601	1.1847	0.520741	1.84867	3.55007	1.82785	0.582923	0.922308
ENSMUSG00000084659		2.36332	1.03998	3.68667	3.54495	1.82576	0.137128	0.461346
ENSMUSG00000088647		10.1496	4.4765	15.8226	3.53459	1.82154	0.00459553	0.0434107
ENSMUSG00000072492	Gm10364	0.937406	0.414325	1.46049	3.52498	1.81761	0.721695	0.978391
ENSMUSG00000091636	A330050F15Rik	2.35608	1.04148	3.67067	3.52447	1.81741	0.327657	0.731493
ENSMUSG00000031962	Cdh15	1.64631	0.727904	2.56472	3.52343	1.81698	0.519792	0.887195
ENSMUSG00000061356	Gm600	3.02584	1.34939	4.70229	3.48475	1.80105	0.33428	0.738673
ENSMUSG00000033740	St18	1.16522	0.520741	1.80969	3.47522	1.7971	0.584713	0.923186
ENSMUSG00000034623	Prss55	7.41821	3.31726	11.5192	3.47249	1.79597	0.0311224	0.176802
ENSMUSG00000056106	Gm9990	2.5644	1.1479	3.9809	3.46799	1.7941	0.268357	0.66423
ENSMUSG00000021086	4930403N07Rik	1.84647	0.828651	2.86428	3.45656	1.78934	0.56267	0.910635
ENSMUSG00000081751	Gm14251	1.15988	0.520741	1.79903	3.45474	1.78858	0.585209	0.923289
ENSMUSG00000085771	C230066G23Rik	3.22952	1.45014	5.0089	3.45408	1.7883	0.31555	0.717698
ENSMUSG00000093622	Gm20703	1.38219	0.621488	2.1429	3.44801	1.78576	0.632623	0.94617
ENSMUSG00000082199	Gm15763	1.15722	0.520741	1.79369	3.4445	1.78429	0.585458	0.923399
ENSMUSG00000085923	Gm12781	1.15722	0.520741	1.79369	3.4445	1.78429	0.585458	0.923399
ENSMUSG00000093223		1.37953	0.621488	2.13756	3.43943	1.78217	0.632784	0.94617
ENSMUSG00000066273	Olfr33	1.59859	0.7264	2.47077	3.40139	1.76613	0.217588	0.59806
ENSMUSG00000048138	Dmrt2	1.59934	0.727904	2.47077	3.39436	1.76314	0.522889	0.889244
ENSMUSG00000078235	Fam43b	1.59934	0.727904	2.47077	3.39436	1.76314	0.522889	0.889244
ENSMUSG00000096022		1.59934	0.727904	2.47077	3.39436	1.76314	0.522889	0.889244
ENSMUSG00000082349	Gm15064	1.82981	0.83432	2.82531	3.38636	1.75974	0.426587	0.820482
ENSMUSG00000031481	Tpte	3.17635	1.45014	4.90257	3.38076	1.75735	0.364209	0.768756
ENSMUSG00000041556	Fbxo2	1.35737	0.621488	2.09326	3.36814	1.75195	0.634132	0.946508
ENSMUSG00000078620	Gm10964	1.1324	0.520741	1.74405	3.34917	1.7438	0.587808	0.924756
ENSMUSG00000056494	Cngb3	19.6183	9.04125	30.1954	3.33973	1.73973	0.0026261	0.0284304
ENSMUSG00000085886	D030047H15Rik	3.60182	1.66297	5.54067	3.33179	1.7363	0.26282	0.657619
ENSMUSG00000069379	Gm4950	1.80233	0.83432	2.77033	3.32047	1.73139	0.428422	0.821668
ENSMUSG00000062905	Vmn1r32	1.79433	0.83432	2.75434	3.3013	1.72303	0.428962	0.821814
ENSMUSG00000023403	Stk31	2.21679	1.03581	3.39777	3.28029	1.71382	0.509458	0.880952
ENSMUSG00000096667		1.32989	0.621488	2.03828	3.27968	1.71356	0.635837	0.947743
ENSMUSG00000032269	Htr3a	1.55503	0.727904	2.38215	3.27262	1.71045	0.525905	0.891773
ENSMUSG00000044055	Otos	0.884241	0.414325	1.35416	3.26834	1.70856	0.868441	1
ENSMUSG00000053168	9030619P08Rik	8.8662	4.15725	13.5752	3.26541	1.70727	0.014755	0.103346
ENSMUSG00000066902	Gm10186	6.20859	2.91162	9.50557	3.26471	1.70695	0.117682	0.421385
ENSMUSG00000085423	Gm15735	1.77484	0.83432	2.71536	3.25458	1.70247	0.430291	0.823319
ENSMUSG00000096385	Gm11168	1.98224	0.933563	3.03092	3.24662	1.69894	0.228121	0.613518
ENSMUSG00000085417	Gm13919	1.75785	0.828651	2.68705	3.24268	1.69719	0.567023	0.91381
ENSMUSG00000087293	Gm14341	0.664598	0.313579	1.01562	3.2388	1.69546	0.831727	1
ENSMUSG00000091283	Gm17234	0.664598	0.313579	1.01562	3.2388	1.69546	0.831727	1
ENSMUSG00000006154	Eps8l1	486.838	231.532	742.144	3.20537	1.68049	3.76034e-40	4.6296e-37
ENSMUSG00000022899	Slc15a2	286.99	137.487	436.492	3.17478	1.66666	1.69902e-15	3.92209e-13
ENSMUSG00000074346	1700095B22Rik	3.03399	1.4543	4.61367	3.17242	1.66559	0.174449	0.529513
ENSMUSG00000003227	Edar	10.3928	4.9859	15.7996	3.16886	1.66396	0.0181277	0.120134
ENSMUSG00000076752	Gm16603	1.30704	0.627157	1.98693	3.16815	1.66364	0.572405	0.916816
ENSMUSG00000047171	Helt	0.862086	0.414325	1.30985	3.1614	1.66056	0.86911	1
ENSMUSG00000030154	Klrb1f	3.23147	1.55505	4.9079	3.1561	1.65814	0.206334	0.581012
ENSMUSG00000032936	Camkv	0.85942	0.414325	1.30452	3.14853	1.65468	0.869192	1
ENSMUSG00000052469	Tcp10c	0.85942	0.414325	1.30452	3.14853	1.65468	0.869192	1
ENSMUSG00000085124	Gm12766	0.85942	0.414325	1.30452	3.14853	1.65468	0.869192	1
ENSMUSG00000093538	Gm20711	1.95034	0.940736	2.95995	3.14642	1.65371	0.351426	0.756141
ENSMUSG00000085206	Gm13380	2.58729	1.24865	3.92593	3.14415	1.65267	0.363762	0.768259
ENSMUSG00000065505	Mir148a	2.1505	1.04148	3.25951	3.12968	1.64602	0.396901	0.79693
ENSMUSG00000042179	Pnliprp1	4.04125	1.96938	6.11313	3.1041	1.63417	0.185068	0.547861
ENSMUSG00000009248	Ascl2	4.4898	2.18938	6.79021	3.10143	1.63293	0.173536	0.527772
ENSMUSG00000084224	Gm12337	0.642444	0.313579	0.971309	3.0975	1.6311	0.833693	1
ENSMUSG00000091866	Gm6257	0.642444	0.313579	0.971309	3.0975	1.6311	0.833693	1
ENSMUSG00000063796	Slc22a8	5.32973	2.60371	8.05575	3.09395	1.62945	0.153271	0.492054
ENSMUSG00000096349		4.23891	2.07579	6.40203	3.08414	1.62487	0.15457	0.494342
ENSMUSG00000032493	Prss44	0.639778	0.313579	0.965976	3.08049	1.62316	0.833935	1
ENSMUSG00000067998	Bpifb9a	0.639778	0.313579	0.965976	3.08049	1.62316	0.833935	1
ENSMUSG00000080518		0.639778	0.313579	0.965976	3.08049	1.62316	0.833935	1
ENSMUSG00000084908	C79798	0.639778	0.313579	0.965976	3.08049	1.62316	0.833935	1
ENSMUSG00000043673	Kcns3	5.70512	2.79803	8.61222	3.07796	1.62197	0.144609	0.475469
ENSMUSG00000044471	AB041803	2.11874	1.03998	3.19749	3.07457	1.62039	0.219789	0.600955
ENSMUSG00000094796	BC147527	2.31889	1.14073	3.49705	3.06564	1.61619	0.274027	0.66989
ENSMUSG00000027315	Spint1	1.05708	0.520741	1.59341	3.05989	1.61348	0.712715	0.976334
ENSMUSG00000085472	Gm15691	1.25723	0.621488	1.89298	3.04588	1.60686	0.752144	0.990272
ENSMUSG00000021749	Oit1	0.837266	0.414325	1.26021	3.04159	1.60482	0.869881	1
ENSMUSG00000065200		0.837266	0.414325	1.26021	3.04159	1.60482	0.869881	1
ENSMUSG00000096791		2.71687	1.35356	4.08018	3.01441	1.59188	0.173592	0.527843
ENSMUSG00000055771	Gm7936	1.2574	0.627157	1.88764	3.00984	1.58969	0.576529	0.919449
ENSMUSG00000089982	Gm7568	1.45755	0.727904	2.18721	3.0048	1.58727	0.628207	0.943964
ENSMUSG00000081805	Gm14335	2.90711	1.45581	4.35842	2.99381	1.58198	0.391648	0.793355
ENSMUSG00000053519	Kcnip1	4.13877	2.07579	6.20175	2.98765	1.57901	0.182609	0.543998
ENSMUSG00000083875	Gm13831	1.03759	0.520741	1.55444	2.98505	1.57775	0.7141	0.976473
ENSMUSG00000087542	Gm15878	1.03759	0.520741	1.55444	2.98505	1.57775	0.7141	0.976473
ENSMUSG00000082534	Gm13712	1.23774	0.621488	1.854	2.98316	1.57684	0.752906	0.990722
ENSMUSG00000082711	Gm12987	1.44956	0.727904	2.17121	2.98282	1.57668	0.628664	0.943964
ENSMUSG00000073465	Park2	5.59202	2.80937	8.37467	2.98098	1.57579	0.0827503	0.340544
ENSMUSG00000086188	Gm15169	5.16303	2.59653	7.72953	2.97686	1.57379	0.136929	0.46102
ENSMUSG00000082550	Gm12344	2.89296	1.45581	4.3301	2.97436	1.57258	0.392159	0.793601
ENSMUSG00000083936	Gm14829	1.23241	0.621488	1.84333	2.966	1.56852	0.753117	0.990772
ENSMUSG00000016498	Pdcd1lg2	2.26467	1.14223	3.38711	2.96535	1.5682	0.507495	0.880152
ENSMUSG00000071735	Gm16462	1.03226	0.520741	1.54377	2.96457	1.56782	0.714484	0.976473
ENSMUSG00000085009	Gm12977	3.09328	1.56222	4.62433	2.9601	1.56564	0.331838	0.735619
ENSMUSG00000070128	Mir485	1.22975	0.621488	1.838	2.95742	1.56434	0.753222	0.990772
ENSMUSG00000026497	Mixl1	0.620289	0.313579	0.926999	2.95619	1.56374	0.835738	1
ENSMUSG00000032087	Dscaml1	0.620289	0.313579	0.926999	2.95619	1.56374	0.835738	1
ENSMUSG00000070214		0.620289	0.313579	0.926999	2.95619	1.56374	0.835738	1
ENSMUSG00000079806		0.620289	0.313579	0.926999	2.95619	1.56374	0.835738	1
ENSMUSG00000082483	Gm13486	0.620289	0.313579	0.926999	2.95619	1.56374	0.835738	1
ENSMUSG00000085452	4930554G24Rik	0.620289	0.313579	0.926999	2.95619	1.56374	0.835738	1
ENSMUSG00000086704	Gm14582	2.27017	1.1479	3.39244	2.95535	1.56333	0.39054	0.792499
ENSMUSG00000054146	Krt15	4.52259	2.28862	6.75657	2.95224	1.56181	0.126766	0.440877
ENSMUSG00000061100	Retnla	3.28202	1.66147	4.90257	2.95075	1.56108	0.204598	0.578993
ENSMUSG00000042262	Ccr8	0.617623	0.313579	0.921667	2.93919	1.55542	0.83599	1
ENSMUSG00000052865	Gm13619	0.617623	0.313579	0.921667	2.93919	1.55542	0.83599	1
ENSMUSG00000065057		0.617623	0.313579	0.921667	2.93919	1.55542	0.83599	1
ENSMUSG00000085418	4930483C13Rik	0.617623	0.313579	0.921667	2.93919	1.55542	0.83599	1
ENSMUSG00000086078	Gm11657	0.617623	0.313579	0.921667	2.93919	1.55542	0.83599	1
ENSMUSG00000086297	Gm15632	0.617623	0.313579	0.921667	2.93919	1.55542	0.83599	1
ENSMUSG00000095133		0.617623	0.313579	0.921667	2.93919	1.55542	0.83599	1
ENSMUSG00000043932	Klri2	1.23258	0.627157	1.838	2.93069	1.55124	0.578663	0.920651
ENSMUSG00000043549	4932442L08Rik	2.24251	1.14223	3.3428	2.92656	1.5492	0.508398	0.880341
ENSMUSG00000026327	Serpinb11	0.614957	0.313579	0.916335	2.92219	1.54705	0.836243	1
ENSMUSG00000048217	Nags	0.614957	0.313579	0.916335	2.92219	1.54705	0.836243	1
ENSMUSG00000086834	Gm14547	0.614957	0.313579	0.916335	2.92219	1.54705	0.836243	1
ENSMUSG00000082334	Gm13244	0.812445	0.414325	1.21057	2.92178	1.54685	0.870677	1
ENSMUSG00000093081	Mir3075	0.812445	0.414325	1.21057	2.92178	1.54685	0.870677	1
ENSMUSG00000050702	Rfpl3s	1.83321	0.935067	2.73136	2.92103	1.54648	0.563307	0.911135
ENSMUSG00000084983	Gm11789	1.63306	0.83432	2.43179	2.9147	1.54335	0.520655	0.88812
ENSMUSG00000051029	Serpinb1b	1.82713	0.933563	2.72069	2.91431	1.54316	0.288882	0.688526
ENSMUSG00000081857	Gm13624	0.809779	0.414325	1.20523	2.90891	1.54048	0.870764	1
ENSMUSG00000048349	Pou4f1	7.50501	3.84367	11.1663	2.90512	1.5386	0.0428649	0.221172
ENSMUSG00000081833	Gm13669	1.01543	0.520741	1.51013	2.89996	1.53603	0.71571	0.976611
ENSMUSG00000092014	Gm4468	1.01543	0.520741	1.51013	2.89996	1.53603	0.71571	0.976611
ENSMUSG00000030996	Art1	1069.91	548.741	1591.07	2.8995	1.5358	2.12539e-52	4.28189e-49
ENSMUSG00000041460	Cacna2d4	3.23418	1.66147	4.8069	2.89317	1.53265	0.242904	0.631806
ENSMUSG00000041700	Lhfpl1	1.01277	0.520741	1.5048	2.88972	1.53093	0.715906	0.976611
ENSMUSG00000082836	Gm13612	1.01277	0.520741	1.5048	2.88972	1.53093	0.715906	0.976611
ENSMUSG00000095261	Gm17391	1.01277	0.520741	1.5048	2.88972	1.53093	0.715906	0.976611
ENSMUSG00000083014	Gm11764	1.20759	0.621488	1.79369	2.88613	1.52914	0.754108	0.991125
ENSMUSG00000030292	1700023A16Rik	6.85921	3.53577	10.1826	2.8799	1.52602	0.0443019	0.226633
ENSMUSG00000025194	Abcc2	1.0101	0.520741	1.49946	2.87948	1.52581	0.716103	0.976611
ENSMUSG00000018459	Slc13a3	24.0435	12.3955	35.6914	2.87938	1.52576	0.00149969	0.0185255
ENSMUSG00000093067		1.21576	0.627157	1.80436	2.87704	1.52459	0.580137	0.921277
ENSMUSG00000079627	Rhox2h	1.20226	0.621488	1.78303	2.86897	1.52053	0.754324	0.991125
ENSMUSG00000089221		1.21309	0.627157	1.79903	2.86854	1.52032	0.580373	0.921461
ENSMUSG00000081496	Gm13428	1.40791	0.727904	2.08792	2.86841	1.52025	0.631088	0.945864
ENSMUSG00000028749	Pla2g2f	3.22455	1.66714	4.78196	2.86837	1.52023	0.140589	0.468106
ENSMUSG00000039375	Wdr17	6.02328	3.11878	8.92778	2.86259	1.51732	0.195965	0.564951
ENSMUSG00000012042	4930579F01Rik	4.20531	2.18221	6.22841	2.85418	1.51308	0.180978	0.54049
ENSMUSG00000030592	Ryr1	13.6099	7.06887	20.1509	2.85066	1.51129	0.0220082	0.138913
ENSMUSG00000080784	Gm13765	2.1982	1.14223	3.25418	2.84897	1.51044	0.510232	0.881539
ENSMUSG00000071769	Rhox3h	0.795623	0.414325	1.17692	2.84057	1.50618	0.87123	1
ENSMUSG00000085035	Gm12031	2.19201	1.14223	3.2418	2.83813	1.50494	0.591093	0.925504
ENSMUSG00000089337		1.99453	1.04148	2.94757	2.83017	1.50089	0.555858	0.907229
ENSMUSG00000022705	Drd3	0.792957	0.414325	1.17159	2.8277	1.49963	0.871319	1
ENSMUSG00000085991	Gm11479	0.792957	0.414325	1.17159	2.8277	1.49963	0.871319	1
ENSMUSG00000086807	C330013F16Rik	0.792957	0.414325	1.17159	2.8277	1.49963	0.871319	1
ENSMUSG00000091897	Gm17019	0.792957	0.414325	1.17159	2.8277	1.49963	0.871319	1
ENSMUSG00000070385	Ampd1	2.38967	1.24865	3.5307	2.82762	1.49959	0.502563	0.876294
ENSMUSG00000037263	1700055N04Rik	1.1881	0.621488	1.75472	2.82341	1.49744	0.7549	0.991225
ENSMUSG00000075046	4933403O03Rik	1.78282	0.933563	2.63207	2.81939	1.49538	0.292157	0.692715
ENSMUSG00000023153	Tmem52	2.17796	1.14073	3.2152	2.81856	1.49496	0.28194	0.680471
ENSMUSG00000071178	Serpina1b	0.598135	0.313579	0.88269	2.81489	1.49308	0.837869	1
ENSMUSG00000084966	2810471M01Rik	0.598135	0.313579	0.88269	2.81489	1.49308	0.837869	1
ENSMUSG00000091022	Gm3115	0.598135	0.313579	0.88269	2.81489	1.49308	0.837869	1
ENSMUSG00000076039		1.58058	0.828651	2.33251	2.81483	1.49305	0.667999	0.961892
ENSMUSG00000083720	Gm12901	0.790291	0.414325	1.16626	2.81483	1.49305	0.871408	1
ENSMUSG00000093051		0.790291	0.414325	1.16626	2.81483	1.49305	0.871408	1
ENSMUSG00000087705		1.18277	0.621488	1.74405	2.80625	1.48864	0.755119	0.991225
ENSMUSG00000022780	Mfi2	3.55829	1.87013	5.24644	2.80538	1.4882	0.384162	0.786168
ENSMUSG00000050014	Apol10b	40.7473	21.4176	60.077	2.80503	1.48802	2.18157e-06	7.92553e-05
ENSMUSG00000052099	Prss51	9.49769	4.99308	14.0023	2.80434	1.48766	0.051948	0.252415
ENSMUSG00000084584	n-R5s15	0.787625	0.414325	1.16092	2.80196	1.48644	0.871497	1
ENSMUSG00000046480	Scn4b	32.8305	17.272	48.389	2.80158	1.48624	6.92601e-05	0.0014989
ENSMUSG00000021509	Slc25a48	0.595468	0.313579	0.877358	2.79789	1.48434	0.838131	1
ENSMUSG00000034555	Tex16	0.595468	0.313579	0.877358	2.79789	1.48434	0.838131	1
ENSMUSG00000047565	Acot10	0.595468	0.313579	0.877358	2.79789	1.48434	0.838131	1
ENSMUSG00000083655	Gm12099	0.595468	0.313579	0.877358	2.79789	1.48434	0.838131	1
ENSMUSG00000087047	1700110K17Rik	0.595468	0.313579	0.877358	2.79789	1.48434	0.838131	1
ENSMUSG00000068417	Pnp2	2.96651	1.56222	4.37079	2.7978	1.48429	0.336482	0.740483
ENSMUSG00000044309	Apol7c	1.97429	1.03998	2.90859	2.79678	1.48377	0.278772	0.676268
ENSMUSG00000031210	Gpr165	2.37018	1.24865	3.49172	2.79641	1.48357	0.503314	0.876745
ENSMUSG00000005339	Fcer1a	5.71892	3.01352	8.42432	2.79551	1.48311	0.0239577	0.147849
ENSMUSG00000081590	Gm14413	1.38043	0.727904	2.03295	2.79288	1.48175	0.632729	0.94617
ENSMUSG00000044322	Dsc1	0.784959	0.414325	1.15559	2.78909	1.4798	0.871587	1
ENSMUSG00000091363	Gm7701	147.76	78.0094	217.512	2.78827	1.47937	1.66946e-15	3.89441e-13
ENSMUSG00000047592	BC055004	5.29735	2.79953	7.79516	2.78445	1.47739	0.333123	0.737055
ENSMUSG00000088410		0.985282	0.520741	1.44982	2.78415	1.47724	0.717962	0.977137
ENSMUSG00000006218	Fam131c	5.29554	2.79953	7.79155	2.78316	1.47672	0.296269	0.69706
ENSMUSG00000019892	Lrriq1	0.592802	0.313579	0.872026	2.78088	1.47554	0.838395	1
ENSMUSG00000044217	Aqp5	0.592802	0.313579	0.872026	2.78088	1.47554	0.838395	1
ENSMUSG00000076252	Mir302b	0.592802	0.313579	0.872026	2.78088	1.47554	0.838395	1
ENSMUSG00000083268	Gm11511	0.592802	0.313579	0.872026	2.78088	1.47554	0.838395	1
ENSMUSG00000086643	Gm15687	0.592802	0.313579	0.872026	2.78088	1.47554	0.838395	1
ENSMUSG00000093007	Mir15a	0.592802	0.313579	0.872026	2.78088	1.47554	0.838395	1
ENSMUSG00000094763		0.592802	0.313579	0.872026	2.78088	1.47554	0.838395	1
ENSMUSG00000095510	Rhox3f	0.592802	0.313579	0.872026	2.78088	1.47554	0.838395	1
ENSMUSG00000095766		3.14099	1.66297	4.619	2.77756	1.47382	0.419288	0.813932
ENSMUSG00000095654		33.9305	17.9882	49.8727	2.77252	1.4712	1.63609e-05	0.000443788
ENSMUSG00000086324	Gm15564	269.771	143.151	396.39	2.76904	1.46939	5.28802e-26	2.9297e-23
ENSMUSG00000078010		3.12957	1.66147	4.59767	2.76724	1.46845	0.246662	0.636223
ENSMUSG00000037145	2210407C18Rik	23.1032	12.2661	33.9402	2.76699	1.46832	0.000687401	0.00989187
ENSMUSG00000091028	Gm10722	16.9981	9.02922	24.9669	2.76512	1.46734	0.000270975	0.00458403
ENSMUSG00000012889	Podnl1	3.13774	1.66714	4.60834	2.76422	1.46687	0.170798	0.52325
ENSMUSG00000092130	D030025P21Rik	1.94738	1.03581	2.85895	2.7601	1.46472	0.690748	0.969559
ENSMUSG00000081585	Gm12926	1.95288	1.04148	2.86428	2.7502	1.45954	0.557719	0.908532
ENSMUSG00000053613	4732444A12Rik	21.3817	11.4375	31.326	2.7389	1.4536	0.0011559	0.0151394
ENSMUSG00000053749	Gm9920	10.2717	5.50248	15.0409	2.73348	1.45074	0.0818787	0.338672
ENSMUSG00000030167	Klrc1	1.354	0.7264	1.98159	2.72796	1.44783	0.367491	0.771344
ENSMUSG00000034362	Csta	1.75006	0.940736	2.55939	2.72062	1.44394	0.513293	0.884712
ENSMUSG00000044997	E130304I02Rik	1.92256	1.03581	2.80931	2.71218	1.43945	0.691324	0.969615
ENSMUSG00000096579	Gm17121	1.9199	1.03581	2.80398	2.70703	1.43671	0.691387	0.969615
ENSMUSG00000093110		2.88036	1.55655	4.20416	2.70094	1.43346	0.488478	0.866598
ENSMUSG00000084782	Gm11213	2.49604	1.35506	3.63703	2.68403	1.4244	0.42789	0.821534
ENSMUSG00000086390	1810019D21Rik	16.0853	8.73901	23.4316	2.68127	1.42292	0.0176078	0.117948
ENSMUSG00000083728	Gm13854	2.29572	1.24865	3.3428	2.67714	1.42069	0.506244	0.878877
ENSMUSG00000064796		2.09823	1.1479	3.04857	2.65578	1.40914	0.468809	0.854414
ENSMUSG00000086018	Gm13179	5.30682	2.9071	7.70655	2.65094	1.4065	0.0447757	0.228057
ENSMUSG00000070280	Slc22a14	2.08124	1.14223	3.02026	2.64418	1.40282	0.594813	0.926744
ENSMUSG00000089803	Gm10171	12.7037	6.97229	18.4351	2.64405	1.40275	0.010984	0.0837926
ENSMUSG00000032494	Tdgf1	2.27015	1.24714	3.29316	2.64056	1.40085	0.276687	0.673068
ENSMUSG00000078365	Mos	4.55178	2.50296	6.60059	2.63712	1.39896	0.258052	0.651555
ENSMUSG00000048469	Olfr564	1.70025	0.935067	2.46544	2.63665	1.3987	0.663445	0.960665
ENSMUSG00000089733	Gm15628	1.51343	0.83432	2.19254	2.62793	1.39393	0.625086	0.943119
ENSMUSG00000075015	Gm10801	19.5802	10.7956	28.3647	2.62743	1.39365	8.94587e-05	0.00186676
ENSMUSG00000088217		5.84191	3.22219	8.46164	2.62606	1.3929	0.0796347	0.332978
ENSMUSG00000069274	Hist1h4f	1.5081	0.83432	2.18187	2.61515	1.38689	0.625379	0.943368
ENSMUSG00000079434	Neu2	6.57104	3.63651	9.50557	2.61393	1.38622	0.0858239	0.348405
ENSMUSG00000039977	Ccdc67	51.0476	28.268	73.8273	2.6117	1.38499	2.85662e-06	9.9394e-05
ENSMUSG00000039079	Trhr2	1.31311	0.727904	1.89831	2.60791	1.38289	0.750021	0.9893
ENSMUSG00000081348	Gm13878	1.31311	0.727904	1.89831	2.60791	1.38289	0.750021	0.9893
ENSMUSG00000085709	Gm14211	1.87576	1.04148	2.71003	2.60209	1.37967	0.561278	0.910044
ENSMUSG00000085298	F730035M05Rik	2.24875	1.24865	3.24885	2.6019	1.37956	0.508143	0.880341
ENSMUSG00000053980	Gm9930	1.30777	0.727904	1.88764	2.59326	1.37477	0.75022	0.989369
ENSMUSG00000084127	Gm13169	1.11012	0.621488	1.59875	2.57245	1.36314	0.889405	1
ENSMUSG00000093089		1.11012	0.621488	1.59875	2.57245	1.36314	0.889405	1
ENSMUSG00000041907	Gpr45	1.48861	0.83432	2.1429	2.56844	1.36089	0.626457	0.943964
ENSMUSG00000036216	Leap2	2.96297	1.66147	4.26447	2.56669	1.35991	0.296644	0.69713
ENSMUSG00000035202	Lars2	50317	28227.4	72406.6	2.56512	1.35903	4.71417e-70	2.08941e-66
ENSMUSG00000093097	Mir3097	1.85627	1.04148	2.67105	2.56466	1.35877	0.562202	0.910336
ENSMUSG00000068480	Gm7551	6.8321	3.83951	9.82468	2.55884	1.35549	0.245309	0.634711
ENSMUSG00000079707	Tcte3	1.48328	0.83432	2.13223	2.55565	1.35369	0.626755	0.943964
ENSMUSG00000022595	Lypd2	20.2857	11.4219	29.1495	2.55206	1.35166	0.00863334	0.069508
ENSMUSG00000038224	Serpinf2	2.77423	1.56222	3.98623	2.55164	1.35142	0.457664	0.844909
ENSMUSG00000045929	Gm20715	1.28753	0.7264	1.84867	2.54497	1.34765	0.374453	0.776416
ENSMUSG00000083750	Gm14108	1.28753	0.7264	1.84867	2.54497	1.34765	0.374453	0.776416
ENSMUSG00000061482	Hist1h4d	3.31578	1.8743	4.75726	2.53815	1.34378	0.240086	0.628683
ENSMUSG00000088153		2.57124	1.45581	3.68667	2.53239	1.3405	0.534559	0.896684
ENSMUSG00000084306	Gm11743	1.28562	0.727904	1.84333	2.53239	1.3405	0.751054	0.989849
ENSMUSG00000085689	Gm16838	1.28562	0.727904	1.84333	2.53239	1.3405	0.751054	0.989849
ENSMUSG00000052368	Gm9873	1.46095	0.828651	2.09326	2.5261	1.33691	0.778958	0.998668
ENSMUSG00000062742	Gm5239	1.28295	0.727904	1.838	2.52506	1.33632	0.751156	0.989853
ENSMUSG00000089581		2.74049	1.55505	3.92593	2.52463	1.33607	0.357219	0.761186
ENSMUSG00000086969	4930443O20Rik	9.71639	5.51382	13.919	2.52438	1.33593	0.0909572	0.360526
ENSMUSG00000000982	Ccl3	4.20769	2.39087	6.02451	2.51979	1.33331	0.373405	0.775614
ENSMUSG00000051354	Samd3	2.19483	1.24714	3.14252	2.51978	1.3333	0.33651	0.740483
ENSMUSG00000087166	L1td1	0.915295	0.520741	1.30985	2.51535	1.33076	0.867531	1
ENSMUSG00000030156	Cd69	7.29474	4.15158	10.4379	2.5142	1.3301	0.11598	0.418399
ENSMUSG00000019865	Nmbr	2.37833	1.35356	3.4031	2.51419	1.33009	0.270887	0.667311
ENSMUSG00000055629	B4galnt4	8.57276	4.88365	12.2619	2.5108	1.32815	0.0511379	0.249783
ENSMUSG00000063875	Rps6-ps1	4.37151	2.49162	6.25139	2.50897	1.32709	0.443192	0.831985
ENSMUSG00000005232	G6pc2	0.912628	0.520741	1.30452	2.50511	1.32488	0.867608	1
ENSMUSG00000095747		0.912628	0.520741	1.30452	2.50511	1.32488	0.867608	1
ENSMUSG00000094282		1.08796	0.621488	1.55444	2.50115	1.32259	0.889486	1
ENSMUSG00000095566		5.64608	3.22936	8.0628	2.49672	1.32003	0.128341	0.443874
ENSMUSG00000086675	9430029A11Rik	4.91151	2.81654	7.00649	2.48762	1.31477	0.240763	0.629488
ENSMUSG00000085377	4930551L18Rik	3.09156	1.77506	4.40806	2.48333	1.31228	0.385239	0.786919
ENSMUSG00000022340	Sybu	433.716	249.133	618.3	2.48181	1.31139	1.48484e-27	9.97141e-25
ENSMUSG00000044708	Kcnj10	15.9106	9.14466	22.6765	2.47975	1.3102	0.0229913	0.143524
ENSMUSG00000087514	Gm16076	1.26613	0.727904	1.80436	2.47884	1.30967	0.7518	0.990083
ENSMUSG00000072487	Gm628	2.71659	1.56222	3.87095	2.47785	1.30909	0.459635	0.846221
ENSMUSG00000046607	Hrk	40.9562	23.5885	58.324	2.47256	1.30601	3.97987e-05	0.000930357
ENSMUSG00000024784	Gpha2	1.25738	0.7264	1.78836	2.46195	1.2998	0.377781	0.779733
ENSMUSG00000026815	Gfi1b	1.08546	0.627157	1.54377	2.46154	1.29956	0.710746	0.976157
ENSMUSG00000083921	Gm15750	2.15585	1.24714	3.06456	2.45727	1.29706	0.338739	0.742871
ENSMUSG00000029151	Slc30a3	2.14844	1.24298	3.0539	2.45693	1.29685	0.713527	0.976473
ENSMUSG00000085684	4930469K13Rik	1.9731	1.14223	2.80398	2.45483	1.29562	0.690157	0.969337
ENSMUSG00000086459	1700030C12Rik	2.86816	1.66147	4.07485	2.45256	1.29429	0.352092	0.756517
ENSMUSG00000026368	F13b	0.714971	0.414325	1.01562	2.45126	1.29352	1	1
ENSMUSG00000037086	1110059M19Rik	0.714971	0.414325	1.01562	2.45126	1.29352	1	1
ENSMUSG00000073551	Spink13	0.714971	0.414325	1.01562	2.45126	1.29352	1	1
ENSMUSG00000085646	Gm11493	0.714971	0.414325	1.01562	2.45126	1.29352	1	1
ENSMUSG00000016982	Pom121l2	1.25547	0.727904	1.78303	2.44954	1.29251	0.752213	0.990304
ENSMUSG00000079965	Gm14853	2.14861	1.24865	3.04857	2.4415	1.28777	0.592529	0.925816
ENSMUSG00000088493		2.32869	1.35356	3.30382	2.44084	1.28738	0.273501	0.669642
ENSMUSG00000044430	Klk12	3.21708	1.87013	4.56403	2.44048	1.28717	0.509237	0.880952
ENSMUSG00000086395	A630014C17Rik	5.19035	3.01803	7.36267	2.43956	1.28662	0.314917	0.716664
ENSMUSG00000075267	Dfnb59	3.04175	1.76939	4.31411	2.43819	1.28581	0.483986	0.864556
ENSMUSG00000054136	Adm2	4.4603	2.59653	6.32408	2.43558	1.28427	0.260104	0.654722
ENSMUSG00000076281		4430.22	2579.26	6281.19	2.43527	1.28408	9.64338e-57	2.37452e-53
ENSMUSG00000027107	Chrna1	7.86358	4.58026	11.1469	2.43369	1.28314	0.223657	0.606989
ENSMUSG00000088947		6.06308	3.5316	8.59457	2.43362	1.2831	0.221553	0.603568
ENSMUSG00000041653	Pnpla3	243.03	141.629	344.432	2.43194	1.28211	4.09502e-19	1.24315e-16
ENSMUSG00000076456	Mir760	0.89314	0.520741	1.26554	2.43026	1.28111	0.868177	1
ENSMUSG00000089766	Gm16538	0.89314	0.520741	1.26554	2.43026	1.28111	0.868177	1
ENSMUSG00000047002	Msgn1	1.06581	0.621488	1.51013	2.42986	1.28087	0.889567	1
ENSMUSG00000087684	1200007C13Rik	2.49411	1.45581	3.53241	2.42643	1.27883	0.536936	0.897707
ENSMUSG00000064057	Scgb3a1	11.0302	6.44171	15.6187	2.42462	1.27776	0.0751526	0.320774
ENSMUSG00000054204	Fam150b	6.5764	3.84217	9.31062	2.42327	1.27696	0.0732042	0.315741
ENSMUSG00000081803	Gm15282	1.06314	0.621488	1.5048	2.42128	1.27577	0.889577	1
ENSMUSG00000059898	Dsc3	0.890474	0.520741	1.26021	2.42002	1.27502	0.868255	1
ENSMUSG00000065557	Mirlet7c-1	0.890474	0.520741	1.26021	2.42002	1.27502	0.868255	1
ENSMUSG00000043664	Tmem221	9.78024	5.71948	13.841	2.41998	1.27499	0.0728214	0.31501
ENSMUSG00000019478	Rab4a	344.232	201.47	486.994	2.4172	1.27334	3.18623e-20	1.13887e-17
ENSMUSG00000065387	n-R5s85	3.9074	2.29013	5.52467	2.41239	1.27046	0.403794	0.803159
ENSMUSG00000068407	Rnase12	0.887808	0.520741	1.25487	2.40978	1.2689	0.868335	1
ENSMUSG00000084522		0.887808	0.520741	1.25487	2.40978	1.2689	0.868335	1
ENSMUSG00000084154	Gm15644	1.23789	0.7264	1.74938	2.40829	1.26801	0.379992	0.781313
ENSMUSG00000054409	Tmem74	1.06864	0.627157	1.51013	2.40789	1.26777	0.711906	0.976272
ENSMUSG00000087042	Gm11611	2.13462	1.25431	3.01492	2.40364	1.26522	0.466987	0.852392
ENSMUSG00000039628	Hs3st6	2.12379	1.24865	2.99893	2.40174	1.26408	0.593363	0.926055
ENSMUSG00000065397	Mir155	1.06598	0.627157	1.5048	2.39939	1.26267	0.712092	0.976334
ENSMUSG00000077202		5.46762	3.21802	7.71721	2.39812	1.26191	0.27381	0.66989
ENSMUSG00000028584	Lrrc38	4.76806	2.80786	6.72825	2.39622	1.26076	0.122054	0.430911
ENSMUSG00000030125	Lrrc23	13.2421	7.80094	18.6833	2.395	1.26003	0.0291902	0.169288
ENSMUSG00000060188	Cxcl17	1.58596	0.935067	2.23685	2.39218	1.25833	0.776619	0.997699
ENSMUSG00000084828	Gm12367	2.64927	1.56222	3.73631	2.39166	1.25801	0.532223	0.895351
ENSMUSG00000083093	Gm15385	1.06331	0.627157	1.49946	2.39089	1.25755	0.712278	0.976334
ENSMUSG00000048665	A430010J10Rik	1.93338	1.14073	2.72602	2.38973	1.25685	0.419961	0.814668
ENSMUSG00000084674		1.93338	1.14073	2.72602	2.38973	1.25685	0.419961	0.814668
ENSMUSG00000082110	Gm11196	6.33686	3.74594	8.92778	2.38332	1.25297	0.282679	0.68119
ENSMUSG00000096571	1700012L04Rik	2.64944	1.56789	3.73098	2.37961	1.25073	0.421617	0.815563
ENSMUSG00000033213	AA467197	3.33686	1.97505	4.69867	2.37902	1.25037	0.277625	0.674613
ENSMUSG00000085843	A730085A09Rik	3.336	1.97505	4.69695	2.37815	1.24984	0.323546	0.726896
ENSMUSG00000031734	Irx3	2185.88	1297.25	3074.51	2.37001	1.24489	1.07693e-39	1.2561e-36
ENSMUSG00000016327	Atp1b4	7.89208	4.68517	11.099	2.36896	1.24425	0.134474	0.456228
ENSMUSG00000085261	Gm13814	2.96978	1.76372	4.17585	2.36764	1.24345	0.583175	0.922308
ENSMUSG00000065421	Mirlet7a-1	2.27819	1.35356	3.20282	2.36623	1.24259	0.331916	0.735706
ENSMUSG00000085955	Gm12356	4.37241	2.59804	6.14678	2.36593	1.24241	0.443177	0.831985
ENSMUSG00000059434	Gckr	3.1446	1.8758	4.41339	2.3528	1.23438	0.481241	0.862932
ENSMUSG00000042451	Mybph	4.35131	2.59653	6.10608	2.35163	1.23366	0.34451	0.748865
ENSMUSG00000088246		60.6948	36.2482	85.1415	2.34885	1.23195	4.91966e-08	2.76712e-06
ENSMUSG00000035277	Arx	0.870985	0.520741	1.22123	2.34517	1.2297	0.868839	1
ENSMUSG00000057160	Gm16372	0.870985	0.520741	1.22123	2.34517	1.2297	0.868839	1
ENSMUSG00000074029	Gm10608	0.870985	0.520741	1.22123	2.34517	1.2297	0.868839	1
ENSMUSG00000084421		1.5638	0.935067	2.19254	2.34479	1.22946	0.777023	0.997833
ENSMUSG00000077337		0.692817	0.414325	0.971309	2.34431	1.22917	1	1
ENSMUSG00000082653	Gm15897	0.692817	0.414325	0.971309	2.34431	1.22917	1	1
ENSMUSG00000084087	Gm13650	0.692817	0.414325	0.971309	2.34431	1.22917	1	1
ENSMUSG00000087489	Gm15656	1.03832	0.621488	1.45515	2.3414	1.22737	0.889667	1
ENSMUSG00000093912		1.03832	0.621488	1.45515	2.3414	1.22737	0.889667	1
ENSMUSG00000041293	Gpr110	4.15718	2.49012	5.82423	2.33894	1.22585	0.348829	0.753598
ENSMUSG00000051969	Tlr11	3.63511	2.17804	5.09218	2.33796	1.22525	0.549457	0.903201
ENSMUSG00000086962	Gm12248	2.25129	1.34939	3.15318	2.33674	1.2245	0.712139	0.976334
ENSMUSG00000082330	Ldha-ps	0.868319	0.520741	1.2159	2.33494	1.22338	0.86892	1
ENSMUSG00000087823		1.03565	0.621488	1.44982	2.33282	1.22208	0.889677	1
ENSMUSG00000091756	Gm3095	1.03565	0.621488	1.44982	2.33282	1.22208	0.889677	1
ENSMUSG00000091672	Gm17129	9.18823	5.51382	12.8627	2.3328	1.22206	0.150875	0.488314
ENSMUSG00000096854	Ifnz	3.11352	1.86863	4.35842	2.33241	1.22182	0.384505	0.78618
ENSMUSG00000033024	Klra9	18.5019	11.1065	25.8973	2.33172	1.22139	0.00278675	0.0298255
ENSMUSG00000076476	Trbv20	0.690151	0.414325	0.965976	2.33144	1.22122	1	1
ENSMUSG00000077804		0.690151	0.414325	0.965976	2.33144	1.22122	1	1
ENSMUSG00000084611		0.690151	0.414325	0.965976	2.33144	1.22122	1	1
ENSMUSG00000021553	Slc28a3	2.25679	1.35506	3.15851	2.3309	1.22089	0.589	0.924944
ENSMUSG00000086515	Gm16292	1.73397	1.04148	2.42646	2.32982	1.22022	0.662216	0.959739
ENSMUSG00000045521	Tssk2	4.14726	2.49162	5.80291	2.32897	1.21969	0.501952	0.876294
ENSMUSG00000057836	Xlr3a	33.8385	20.3493	47.3276	2.32577	1.21771	0.00177744	0.021008
ENSMUSG00000050164	Mchr1	0.865653	0.520741	1.21057	2.3247	1.21704	0.869001	1
ENSMUSG00000081276	Gm13132	0.865653	0.520741	1.21057	2.3247	1.21704	0.869001	1
ENSMUSG00000081899	Gm13606	0.865653	0.520741	1.21057	2.3247	1.21704	0.869001	1
ENSMUSG00000093287		0.865653	0.520741	1.21057	2.3247	1.21704	0.869001	1
ENSMUSG00000064294	Aox3	3.11369	1.8743	4.35308	2.32251	1.21569	0.290943	0.691504
ENSMUSG00000052435	Cebpe	1.3858	0.83432	1.93728	2.32199	1.21536	0.747387	0.9893
ENSMUSG00000095956	1700036A12Rik	2.42696	1.46148	3.39244	2.32124	1.2149	0.501144	0.875994
ENSMUSG00000082031	Gm8097	4.48592	2.70445	6.26739	2.31743	1.21253	0.441355	0.830364
ENSMUSG00000088442		0.862987	0.520741	1.20523	2.31446	1.21067	0.869082	1
ENSMUSG00000082981	Gm11526	2.23105	1.34789	3.11421	2.31043	1.20816	0.462322	0.848631
ENSMUSG00000056328	Myh1	7.3934	4.46933	10.3175	2.30851	1.20696	0.104166	0.391194
ENSMUSG00000051314	Ffar2	9.27048	5.61457	12.9264	2.3023	1.20307	0.143567	0.473776
ENSMUSG00000092951		6.17292	3.74594	8.5999	2.29579	1.19899	0.319257	0.722015
ENSMUSG00000042367	Gjb3	1.53823	0.933563	2.1429	2.2954	1.19874	0.454359	0.841752
ENSMUSG00000052981	Ube2ql1	154.381	93.8626	214.899	2.28951	1.19504	3.83189e-11	4.14236e-09
ENSMUSG00000081143	Gm15823	1.5329	0.933563	2.13223	2.28397	1.19155	0.454789	0.841927
ENSMUSG00000043036	Ccdc63	123.009	74.9235	171.095	2.28359	1.1913	1.43379e-09	1.15964e-07
ENSMUSG00000081532	Gm15781	1.54448	0.940736	2.14823	2.28356	1.19129	0.623404	0.942736
ENSMUSG00000086436	Gm13690	5.10677	3.11311	7.10044	2.28082	1.18955	0.490626	0.868361
ENSMUSG00000025129	Ppp1r27	2.56065	1.56222	3.55907	2.27821	1.1879	0.534882	0.896684
ENSMUSG00000085765	Gm12333	1.35815	0.828651	1.88764	2.27797	1.18775	0.903744	1
ENSMUSG00000022762	Ncam2	4.57787	2.79803	6.35772	2.27222	1.1841	0.389623	0.79128
ENSMUSG00000082599	Gm13141	1.18739	0.7264	1.64839	2.26925	1.18222	0.482047	0.863313
ENSMUSG00000084940	Gm15935	1.18739	0.7264	1.64839	2.26925	1.18222	0.482047	0.863313
ENSMUSG00000065870		2.90013	1.77506	4.02521	2.26765	1.1812	0.453503	0.840845
ENSMUSG00000051480	A130050O07Rik	1.53648	0.940736	2.13223	2.26656	1.1805	0.623834	0.942748
ENSMUSG00000028716	Pdzk1ip1	10.0246	6.14098	13.9083	2.26483	1.17941	0.131852	0.451549
ENSMUSG00000031518	Spata4	1.36098	0.83432	1.88764	2.26249	1.17791	0.748271	0.9893
ENSMUSG00000086028	Gm12243	1.36098	0.83432	1.88764	2.26249	1.17791	0.748271	0.9893
ENSMUSG00000031966	Glb1l3	4.56313	2.80219	6.32408	2.25683	1.1743	0.199311	0.57037
ENSMUSG00000069805	Fbp1	3.22187	1.98071	4.46303	2.25324	1.172	0.287067	0.686563
ENSMUSG00000000562	Adora3	14.0186	8.62542	19.4117	2.25052	1.17026	0.0778458	0.328036
ENSMUSG00000081487	Gm13689	2.87514	1.76939	3.9809	2.24988	1.16985	0.558387	0.908947
ENSMUSG00000090709	Gm17173	0.846165	0.520741	1.17159	2.24985	1.16983	0.869602	1
ENSMUSG00000072769	Gm10419	5.75503	3.54294	7.96713	2.24873	1.16911	0.188946	0.55372
ENSMUSG00000039653	Baat	2.86431	1.76372	3.9649	2.24804	1.16867	0.661301	0.959319
ENSMUSG00000081058	Hist2h3c2	16.0271	9.87222	22.182	2.24691	1.16795	0.00605968	0.0532508
ENSMUSG00000088058		2.19915	1.35506	3.04324	2.24583	1.16725	0.590859	0.925373
ENSMUSG00000082008	Gm12390	2.18407	1.34789	3.02026	2.24073	1.16397	0.464565	0.850775
ENSMUSG00000094557		0.843499	0.520741	1.16626	2.23961	1.16325	0.869685	1
ENSMUSG00000059150	Rpl26-ps4	1.34132	0.828651	1.854	2.23737	1.1618	0.90358	1
ENSMUSG00000022262	Dnahc5	0.670662	0.414325	0.926999	2.23737	1.1618	1	1
ENSMUSG00000052819	Best2	0.670662	0.414325	0.926999	2.23737	1.1618	1	1
ENSMUSG00000076620	Ighj2	0.670662	0.414325	0.926999	2.23737	1.1618	1	1
ENSMUSG00000090722	Gm8378	0.670662	0.414325	0.926999	2.23737	1.1618	1	1
ENSMUSG00000001665	Gstt3	74.8541	46.2792	103.429	2.23489	1.1602	3.27966e-06	0.000110772
ENSMUSG00000036169	Sostdc1	7.04187	4.36025	9.7235	2.23003	1.15706	0.274048	0.66989
ENSMUSG00000058427	Cxcl2	9.22564	5.71647	12.7348	2.22774	1.15558	0.0358398	0.196353
ENSMUSG00000066158	AY512931	2.67865	1.65996	3.69733	2.22736	1.15533	0.211517	0.590058
ENSMUSG00000020636	Allc	0.667996	0.414325	0.921667	2.2245	1.15348	1	1
ENSMUSG00000060726	Tmsb15a	0.667996	0.414325	0.921667	2.2245	1.15348	1	1
ENSMUSG00000071567	A830039N20Rik	0.667996	0.414325	0.921667	2.2245	1.15348	1	1
ENSMUSG00000080655		0.667996	0.414325	0.921667	2.2245	1.15348	1	1
ENSMUSG00000083657	Gm12245	0.667996	0.414325	0.921667	2.2245	1.15348	1	1
ENSMUSG00000084220	Gm12387	0.667996	0.414325	0.921667	2.2245	1.15348	1	1
ENSMUSG00000084991	Gm16260	0.667996	0.414325	0.921667	2.2245	1.15348	1	1
ENSMUSG00000088479		0.667996	0.414325	0.921667	2.2245	1.15348	1	1
ENSMUSG00000089994	Gm16239	5.35422	3.32444	7.384	2.22113	1.15129	0.312177	0.714221
ENSMUSG00000087228	Gm12827	2.18233	1.35506	3.00959	2.221	1.15121	0.591411	0.925637
ENSMUSG00000091950	Olfr421-ps1	0.838167	0.520741	1.15559	2.21913	1.14999	0.869853	1
ENSMUSG00000078197	Gm17374	1.33333	0.828651	1.838	2.21807	1.1493	0.9035	1
ENSMUSG00000042707	Dnali1	1.83324	1.14073	2.52575	2.21416	1.14676	0.508396	0.880341
ENSMUSG00000089567		51.9808	32.3475	71.6141	2.2139	1.14659	0.000205006	0.0036562
ENSMUSG00000024578	Il17b	0.66533	0.414325	0.916335	2.21163	1.14511	1	1
ENSMUSG00000049314	Fbxw13	0.66533	0.414325	0.916335	2.21163	1.14511	1	1
ENSMUSG00000065518	Mir423	0.66533	0.414325	0.916335	2.21163	1.14511	1	1
ENSMUSG00000074625	Arhgap40	0.66533	0.414325	0.916335	2.21163	1.14511	1	1
ENSMUSG00000006587	Snai3	50.9331	31.7196	70.1465	2.21145	1.14499	4.51351e-06	0.000143519
ENSMUSG00000095891	Gm10716	8.49363	5.29081	11.6965	2.21071	1.14451	0.0778091	0.327944
ENSMUSG00000095891	Gm10717	8.49363	5.29081	11.6965	2.21071	1.14451	0.0778091	0.327944
ENSMUSG00000095891	Gm10106	8.49363	5.29081	11.6965	2.21071	1.14451	0.0778091	0.327944
ENSMUSG00000047428	Dlk2	24.0037	14.9547	33.0527	2.21019	1.14417	0.00731562	0.0613946
ENSMUSG00000073174	Magi2	1.33883	0.83432	1.84333	2.20939	1.14365	0.749073	0.9893
ENSMUSG00000042002	Foxn4	1.16599	0.727904	1.60408	2.20369	1.13992	0.8892	1
ENSMUSG00000044141	E130201H02Rik	1.33616	0.83432	1.838	2.20299	1.13947	0.74917	0.9893
ENSMUSG00000062391	4932435O22Rik	13.4898	8.42393	18.5557	2.20273	1.13929	0.0781706	0.329029
ENSMUSG00000038453	Srcin1	23.113	14.4498	31.7762	2.19908	1.1369	0.0138864	0.0990465
ENSMUSG00000064308	2410137M14Rik	3.31991	2.07579	4.56403	2.19869	1.13665	0.414032	0.80963
ENSMUSG00000085509	Gm11521	2.32665	1.45581	3.19749	2.19637	1.13512	0.711144	0.976272
ENSMUSG00000045019	Acer1	1.16332	0.727904	1.59875	2.19637	1.13512	0.88921	1
ENSMUSG00000066058	Cldn19	1.6579	1.03998	2.27582	2.18834	1.12983	0.445182	0.833659
ENSMUSG00000031933	Folr4	2.65	1.66297	3.63703	2.18707	1.129	0.641589	0.9501
ENSMUSG00000066170	E230001N04Rik	5.46589	3.43085	7.50093	2.18632	1.1285	0.31036	0.712735
ENSMUSG00000040467	4921522P10Rik	5.79399	3.64218	7.9458	2.18161	1.12539	0.145757	0.477617
ENSMUSG00000088423		3.29776	2.07579	4.51972	2.17735	1.12257	0.414666	0.810426
ENSMUSG00000086555	Gm13446	3.29851	2.0773	4.51972	2.17577	1.12153	0.600849	0.931082
ENSMUSG00000065389		1.982	1.24865	2.71536	2.17465	1.12078	0.689954	0.969337
ENSMUSG00000085810	Gm16325	5.93007	3.73876	8.12139	2.17221	1.11917	0.342794	0.746894
ENSMUSG00000085055	Gm15958	2.97191	1.8743	4.06952	2.17122	1.11851	0.348126	0.752838
ENSMUSG00000045382	Cxcr4	738.964	467.281	1010.65	2.16282	1.11291	1.69998e-24	8.5621e-22
ENSMUSG00000020872	Tac4	1.80308	1.14073	2.46544	2.16129	1.11189	0.510141	0.8815
ENSMUSG00000086148	Gm15271	3.451	2.18371	4.71828	2.16067	1.11148	0.598939	0.929683
ENSMUSG00000031620	1700007B14Rik	0.990657	0.627157	1.35416	2.1592	1.1105	0.865455	1
ENSMUSG00000081217	Gm15268	3.11976	1.97505	4.26447	2.15917	1.11048	0.384297	0.78618
ENSMUSG00000080358		1.80383	1.14223	2.46544	2.15845	1.10999	0.797787	1
ENSMUSG00000031132	Cd40lg	1.31667	0.83432	1.79903	2.15628	1.10854	0.749888	0.9893
ENSMUSG00000085633	4930580A09Rik	1.31667	0.83432	1.79903	2.15628	1.10854	0.749888	0.9893
ENSMUSG00000031551	Ido1	10.1699	6.44738	13.8924	2.15473	1.10751	0.116696	0.419848
ENSMUSG00000086733	Gm11685	3.443	2.18371	4.70229	2.15335	1.10658	0.599038	0.929705
ENSMUSG00000073739	Gm16287	1.31401	0.83432	1.79369	2.14989	1.10426	0.749987	0.9893
ENSMUSG00000093188		1.31401	0.83432	1.79369	2.14989	1.10426	0.749987	0.9893
ENSMUSG00000032892	Rangrf	3.60093	2.28862	4.91323	2.14681	1.10219	0.351285	0.756105
ENSMUSG00000084762	Gm14074	1.96176	1.24714	2.67638	2.14601	1.10166	0.418221	0.813449
ENSMUSG00000087321	Gm5353	3.27566	2.08297	4.46836	2.14519	1.10111	0.577937	0.920405
ENSMUSG00000094613		8.31975	5.29231	11.3472	2.14409	1.10037	0.160965	0.504905
ENSMUSG00000070568	1700039E15Rik	1.14384	0.727904	1.55977	2.14282	1.09951	0.889282	1
ENSMUSG00000080932	Gm10224	5.37844	3.42785	7.32903	2.13809	1.09632	0.11387	0.413887
ENSMUSG00000054391	4930517O19Rik	1.63383	1.04148	2.22618	2.13751	1.09593	0.77576	0.99748
ENSMUSG00000091661	Gm17021	2.77234	1.76939	3.77529	2.13367	1.09334	0.639626	0.94963
ENSMUSG00000039278	Pcsk1n	0.648508	0.414325	0.88269	2.13043	1.09114	1	1
ENSMUSG00000048752	Prss50	0.648508	0.414325	0.88269	2.13043	1.09114	1	1
ENSMUSG00000082827	Gm5397	0.648508	0.414325	0.88269	2.13043	1.09114	1	1
ENSMUSG00000087131	Gm16152	0.648508	0.414325	0.88269	2.13043	1.09114	1	1
ENSMUSG00000016346	Kcnq2	1.1385	0.727904	1.5491	2.12817	1.08961	0.889301	1
ENSMUSG00000082809	Gm14150	548.792	351.69	745.893	2.12088	1.08466	1.20244e-21	4.75844e-19
ENSMUSG00000017195	Zpbp2	2.27984	1.46148	3.09821	2.11992	1.08401	0.588269	0.92493
ENSMUSG00000087190	D430001F17Rik	5.51647	3.53727	7.49566	2.11905	1.08342	0.272997	0.669327
ENSMUSG00000041748	Ccrl1	4.53569	2.90861	6.16277	2.1188	1.08325	0.231761	0.617837
ENSMUSG00000093472	4930438E09Rik	1.29168	0.828651	1.75472	2.11756	1.0824	0.903073	1
ENSMUSG00000029618	Ocm	0.645842	0.414325	0.877358	2.11756	1.0824	1	1
ENSMUSG00000050087	Cby3	0.645842	0.414325	0.877358	2.11756	1.0824	1	1
ENSMUSG00000095565		0.645842	0.414325	0.877358	2.11756	1.0824	1	1
ENSMUSG00000037872	Darc	23.956	15.3789	32.5332	2.11545	1.08096	0.00614177	0.0537133
ENSMUSG00000073535	Gm5532	1187.48	762.805	1612.15	2.11345	1.0796	7.90426e-28	5.47395e-25
ENSMUSG00000090105	Gm15890	5.49261	3.52859	7.45662	2.1132	1.07943	0.152716	0.491137
ENSMUSG00000028838	Extl1	552.335	354.906	749.763	2.11257	1.079	1.40625e-21	5.46735e-19
ENSMUSG00000044349	Snhg11	11.5088	7.39529	15.6224	2.11248	1.07894	0.127273	0.442083
ENSMUSG00000007944	Ttc9b	0.643176	0.414325	0.872026	2.10469	1.07361	1	1
ENSMUSG00000068167	Csnka2ip	0.643176	0.414325	0.872026	2.10469	1.07361	1	1
ENSMUSG00000077347		0.643176	0.414325	0.872026	2.10469	1.07361	1	1
ENSMUSG00000081376	Gm11694	0.643176	0.414325	0.872026	2.10469	1.07361	1	1
ENSMUSG00000084307	Gm12151	0.643176	0.414325	0.872026	2.10469	1.07361	1	1
ENSMUSG00000087963		0.643176	0.414325	0.872026	2.10469	1.07361	1	1
ENSMUSG00000088230		0.643176	0.414325	0.872026	2.10469	1.07361	1	1
ENSMUSG00000093892	Gm3261	0.643176	0.414325	0.872026	2.10469	1.07361	1	1
ENSMUSG00000022269	2011-03-01	8.86392	5.7108	12.017	2.10426	1.07332	0.0739151	0.317448
ENSMUSG00000065204		1.29452	0.83432	1.75472	2.10317	1.07257	0.750717	0.989746
ENSMUSG00000095186	Gm10718	31.6864	20.4421	42.9307	2.10011	1.07046	0.000147612	0.00281033
ENSMUSG00000087750		8.06564	5.20591	10.9254	2.09865	1.06946	0.221645	0.603722
ENSMUSG00000065013		1.28369	0.828651	1.73872	2.09825	1.06919	0.902989	1
ENSMUSG00000085760	Gm14302	2.57201	1.66297	3.48106	2.09328	1.06576	0.73053	0.983158
ENSMUSG00000080905	Gm13295	0.64051	0.414325	0.866694	2.09182	1.06476	1	1
ENSMUSG00000083457	Gm12839	0.64051	0.414325	0.866694	2.09182	1.06476	1	1
ENSMUSG00000018581	Dnahc11	3.37045	2.18221	4.5587	2.08903	1.06283	0.412601	0.808842
ENSMUSG00000092773		0.968503	0.627157	1.30985	2.08855	1.0625	0.866047	1
ENSMUSG00000010529	Gm266	62.0326	40.2001	83.8651	2.08619	1.06087	1.7739e-05	0.000474776
ENSMUSG00000076934	Iglv1	7.85643	5.09232	10.6205	2.0856	1.06046	0.186495	0.549787
ENSMUSG00000065818	Snord35a	3.52438	2.28446	4.76431	2.08553	1.06041	0.618032	0.939583
ENSMUSG00000057615	Ldoc1	7.21066	4.67649	9.74483	2.08379	1.05921	0.119661	0.425822
ENSMUSG00000086008	Gm8817	0.965836	0.627157	1.30452	2.08004	1.05661	0.866119	1
ENSMUSG00000074207	Adh1	105.836	68.7353	142.937	2.07953	1.05626	3.35861e-07	1.53149e-05
ENSMUSG00000073980	Gm9574	1.11826	0.7264	1.51013	2.07892	1.05583	0.489809	0.867817
ENSMUSG00000020323	Prss57	3.19495	2.07579	4.31411	2.07829	1.0554	0.479929	0.862372
ENSMUSG00000075184	F930017D23Rik	2.08485	1.35506	2.81464	2.07713	1.05459	0.68766	0.968936
ENSMUSG00000084184	Gm13474	2.08485	1.35506	2.81464	2.07713	1.05459	0.68766	0.968936
ENSMUSG00000062727	Hist1h2bk	1.76503	1.1479	2.38215	2.07523	1.05327	0.661104	0.959319
ENSMUSG00000040505	Abcg5	1.43542	0.933563	1.93728	2.07515	1.05322	0.562549	0.910573
ENSMUSG00000018479	1700125H20Rik	1.11902	0.727904	1.51013	2.07462	1.05285	0.889373	1
ENSMUSG00000082509	Gm15673	1.11902	0.727904	1.51013	2.07462	1.05285	0.889373	1
ENSMUSG00000086039	Gm12227	3.19304	2.0773	4.30877	2.07422	1.05257	0.677541	0.965222
ENSMUSG00000087449	Gm12971	3.67079	2.38937	4.95221	2.0726	1.05144	0.436545	0.827369
ENSMUSG00000025977	Boll	2.87235	1.87013	3.87457	2.07181	1.0509	0.746858	0.989259
ENSMUSG00000070489	4930527J03Rik	1.1156	0.7264	1.5048	2.07158	1.05073	0.490121	0.867885
ENSMUSG00000090039	Gm15894	1.1156	0.7264	1.5048	2.07158	1.05073	0.490121	0.867885
ENSMUSG00000087444	Gm5475	1.75419	1.14223	2.36616	2.07153	1.05069	0.798115	1
ENSMUSG00000078932	CN725425	9.90046	6.44738	13.3535	2.07116	1.05044	0.148531	0.483846
ENSMUSG00000086849	Gm13840	4.78447	3.11727	6.45167	2.06965	1.04939	0.386035	0.787746
ENSMUSG00000038151	Prdm1	537.93	350.584	725.277	2.06877	1.04877	6.51594e-19	1.9e-16
ENSMUSG00000065581	Mir194-1	4.45296	2.90444	6.00147	2.06631	1.04705	0.497822	0.87344
ENSMUSG00000042118	Bhmt2	8.28868	5.4074	11.17	2.06568	1.04662	0.273408	0.669503
ENSMUSG00000088650		2.55536	1.66864	3.44208	2.06281	1.04461	0.615534	0.938798
ENSMUSG00000065530	Mir99a	8.43752	5.51382	11.3612	2.0605	1.04299	0.244291	0.633592
ENSMUSG00000045912	C2cd4c	4.29731	2.80937	5.78526	2.05928	1.04214	0.34569	0.750268
ENSMUSG00000083284	Gm13688	7.78269	5.09382	10.4715	2.05573	1.03965	0.295001	0.695521
ENSMUSG00000048852	Gm12185	27.1607	17.7773	36.5441	2.05567	1.03961	0.032338	0.181658
ENSMUSG00000001804	Dsg4	1.58877	1.03998	2.13756	2.05539	1.03941	0.450375	0.838156
ENSMUSG00000045246	Kcng4	13.9615	9.1405	18.7825	2.05487	1.03905	0.164685	0.511648
ENSMUSG00000051906	Cd209f	6.50283	4.26217	8.74349	2.05142	1.03662	0.133379	0.454209
ENSMUSG00000025165	Sectm1a	2.0572	1.34939	2.765	2.04907	1.03497	0.814291	1
ENSMUSG00000063929	Cyp4a32	2.05453	1.34939	2.75967	2.04512	1.03219	0.814288	1
ENSMUSG00000083838	Gm11957	2.0627	1.35506	2.77033	2.04443	1.0317	0.688146	0.968936
ENSMUSG00000005763	Cd247	92.8755	61.0525	124.698	2.04248	1.03032	6.42106e-06	0.00019645
ENSMUSG00000075014	Gm10800	293.432	192.892	393.972	2.04245	1.0303	6.88569e-26	3.7218e-23
ENSMUSG00000075405	9430097D07Rik	1.58419	1.04148	2.1269	2.04219	1.03011	0.776651	0.997699
ENSMUSG00000089829	Gm16565	63.6552	41.8963	85.414	2.0387	1.02765	0.000204119	0.00364848
ENSMUSG00000063234	Gpr84	4.73483	3.11727	6.35239	2.0378	1.02701	0.386884	0.788588
ENSMUSG00000072592	Gm10373	2.20637	1.4528	2.95995	2.03741	1.02674	0.214862	0.595045
ENSMUSG00000080461		0.943513	0.621488	1.26554	2.0363	1.02595	1	1
ENSMUSG00000080610	Snord110	0.943513	0.621488	1.26554	2.0363	1.02595	1	1
ENSMUSG00000084840	Gm11468	0.943513	0.621488	1.26554	2.0363	1.02595	1	1
ENSMUSG00000094281		16.5703	10.9265	22.214	2.03303	1.02363	0.0180083	0.119414
ENSMUSG00000072738	Gm16440	1.41669	0.935067	1.89831	2.03013	1.02157	0.904292	1
ENSMUSG00000082484	Gm16177	0.940847	0.621488	1.26021	2.02772	1.01986	1	1
ENSMUSG00000084025	Gm6276	0.940847	0.621488	1.26021	2.02772	1.01986	1	1
ENSMUSG00000087829		0.940847	0.621488	1.26021	2.02772	1.01986	1	1
ENSMUSG00000090121	Abhd12b	0.940847	0.621488	1.26021	2.02772	1.01986	1	1
ENSMUSG00000093617	4933438K21Rik	0.940847	0.621488	1.26021	2.02772	1.01986	1	1
ENSMUSG00000029420	Rimbp2	1.5672	1.03581	2.09859	2.02603	1.01865	0.913997	1
ENSMUSG00000093175		1.41402	0.935067	1.89298	2.02443	1.01751	0.904268	1
ENSMUSG00000033633	Clec18a	17.2762	11.4273	23.125	2.02367	1.01697	0.0130762	0.094793
ENSMUSG00000030834	Abcc6	6.13401	4.05801	8.21	2.02316	1.01661	0.340158	0.744298
ENSMUSG00000092471	Cyp21a2-ps	4.24842	2.81087	5.68597	2.02285	1.01639	0.500562	0.875462
ENSMUSG00000092622	2410004A20Rik	1.88378	1.24714	2.52041	2.02095	1.01504	0.505546	0.878216
ENSMUSG00000026770	Il2ra	20.8699	13.8238	27.9159	2.01941	1.01393	0.0119519	0.0891708
ENSMUSG00000081934	Gm12193	0.938181	0.621488	1.25487	2.01915	1.01374	1	1
ENSMUSG00000085391	Gm16150	0.938181	0.621488	1.25487	2.01915	1.01374	1	1
ENSMUSG00000086947	4930522O17Rik	2.03429	1.34789	2.72069	2.01849	1.01327	0.554119	0.906648
ENSMUSG00000094460		2.03429	1.34789	2.72069	2.01849	1.01327	0.554119	0.906648
ENSMUSG00000043972	Opn5	0.946348	0.627157	1.26554	2.0179	1.01285	0.866654	1
ENSMUSG00000065346		0.946348	0.627157	1.26554	2.0179	1.01285	0.866654	1
ENSMUSG00000029685	Asb15	1994.16	1322.06	2666.26	2.01674	1.01202	3.64107e-28	2.60289e-25
ENSMUSG00000086584	Gm12002	520.815	345.374	696.255	2.01595	1.01146	3.04671e-17	8.23392e-15
ENSMUSG00000073846	Gm12526	5.01776	3.3286	6.70692	2.01494	1.01073	0.214957	0.595127
ENSMUSG00000052730	Gm5111	4.064	2.69728	5.43072	2.01341	1.00964	0.481419	0.862932
ENSMUSG00000071392	Ect2l	6.56585	4.3599	8.7718	2.01193	1.00858	0.0494868	0.24463
ENSMUSG00000068855	Hist2h2ac	5.16892	3.43236	6.90549	2.01188	1.00854	0.545183	0.900989
ENSMUSG00000070637	Gm694	2.50288	1.66297	3.3428	2.01014	1.00729	0.730986	0.983158
ENSMUSG00000021797	9230112D13Rik	0.943682	0.627157	1.26021	2.00939	1.00676	0.866728	1
ENSMUSG00000084139	Gm12322	0.943682	0.627157	1.26021	2.00939	1.00676	0.866728	1
ENSMUSG00000081684	Rps2-ps13	26.4509	17.5826	35.3193	2.00877	1.00631	0.00960463	0.0753178
ENSMUSG00000041605	5730559C18Rik	4.21468	2.8037	5.62567	2.00652	1.00469	0.422972	0.816861
ENSMUSG00000004296	Il12b	4.21857	2.80786	5.62929	2.00483	1.00348	0.245891	0.635345
ENSMUSG00000004952	Rasa4	394.343	262.717	525.968	2.00203	1.00147	1.06154e-14	2.04564e-12
ENSMUSG00000091956	C2cd4b	16.6795	11.1167	22.2423	2.0008	1.00058	0.0407777	0.214115
ENSMUSG00000021508	Cxcl14	3.74349	2.49579	4.99118	1.99984	0.999888	0.434869	0.826065
ENSMUSG00000085204	Gm15327	7.93574	5.29532	10.5762	1.99727	0.998027	0.389702	0.791367
ENSMUSG00000066007	Zfp600	6.23221	4.15876	8.30567	1.99715	0.997944	0.356799	0.760877
ENSMUSG00000073430	Gm10505	2.9619	1.97655	3.94725	1.99704	0.997866	0.660268	0.959319
ENSMUSG00000085784	Gm12158	3.42899	2.28862	4.56936	1.99655	0.997511	0.410972	0.808123
ENSMUSG00000091455	Otogl	10.43	6.96245	13.8976	1.99608	0.997171	0.212755	0.592171
ENSMUSG00000074939	Chrm5	1.08811	0.7264	1.44982	1.9959	0.99704	0.493397	0.870129
ENSMUSG00000088583		5.13802	3.43085	6.84518	1.99518	0.996522	0.402319	0.801933
ENSMUSG00000021211	Akr1c12	2.80056	1.87013	3.73098	1.99503	0.996413	0.746982	0.989259
ENSMUSG00000020641	Rsad2	964.11	643.958	1284.26	1.99432	0.995899	1.03568e-20	3.76258e-18
ENSMUSG00000033368	Trim69	5.60586	3.74443	7.46729	1.99424	0.995838	0.369987	0.773457
ENSMUSG00000063885	Gm6498	2.48873	1.66297	3.31449	1.99311	0.995022	0.731079	0.983158
ENSMUSG00000085812	Gm15843	2.3348	1.56072	3.10887	1.99195	0.99418	0.457555	0.844849
ENSMUSG00000085068	Gm15895	2.95657	1.97655	3.93659	1.99165	0.993963	0.660324	0.959319
ENSMUSG00000067768	Xlr4b	38.4576	25.717	51.1982	1.99083	0.99337	0.0159998	0.109808
ENSMUSG00000072460	Atp5l-ps1	2.32738	1.55655	3.09821	1.99043	0.993078	0.828095	1
ENSMUSG00000068262	Gm5879	5.58781	3.74027	7.43536	1.98792	0.991261	0.517018	0.886402
ENSMUSG00000094392		72.3614	48.4388	96.284	1.98775	0.991135	0.000132022	0.00257547
ENSMUSG00000077349		13.6595	9.14617	18.1728	1.98693	0.990544	0.159354	0.502269
ENSMUSG00000095111		1.39378	0.933563	1.854	1.98594	0.989822	0.565626	0.912753
ENSMUSG00000090627	Gm8356	1.86162	1.24714	2.4761	1.98542	0.989447	0.506784	0.879471
ENSMUSG00000038765	Lmx1b	3.72485	2.49579	4.95392	1.98491	0.989077	0.379805	0.781214
ENSMUSG00000028003	Lrat	18.9373	12.6918	25.1829	1.98419	0.988553	0.0360539	0.19733
ENSMUSG00000094707		2.33022	1.56222	3.09821	1.9832	0.987833	0.711097	0.976272
ENSMUSG00000084401	Gm12586	1.86237	1.24865	2.4761	1.98303	0.987708	0.7974	1
ENSMUSG00000069554	I830134H01Rik	2.33838	1.56789	3.10887	1.98283	0.987564	0.586444	0.924174
ENSMUSG00000025475	Gpr123	2.00947	1.34789	2.67105	1.98166	0.986707	0.5552	0.906857
ENSMUSG00000020205	Phlda1	1969.33	1321.79	2616.86	1.97979	0.985345	1.74363e-26	1.04434e-23
ENSMUSG00000076258		12881.2	8647.5	17115	1.97918	0.984906	1.47729e-36	1.4881e-33
ENSMUSG00000091732	Gm17541	2.01839	1.35506	2.68172	1.97904	0.984798	0.689132	0.96928
ENSMUSG00000017002	Slpi	13.7858	9.25524	18.3164	1.97903	0.984794	0.0719377	0.312695
ENSMUSG00000070683	Lactbl1	1.85971	1.24865	2.47077	1.97876	0.984598	0.797418	1
ENSMUSG00000093599		9.27738	6.23455	12.3202	1.97612	0.98267	0.23568	0.622664
ENSMUSG00000031519	Asb5	721.77	485.061	958.478	1.976	0.982581	1.37534e-19	4.54909e-17
ENSMUSG00000090284	Gm17613	1.38845	0.933563	1.84333	1.97452	0.981499	0.566028	0.91307
ENSMUSG00000093386	1700120O09Rik	1.38845	0.933563	1.84333	1.97452	0.981499	0.566028	0.91307
ENSMUSG00000030623	1700019G06Rik	3.71059	2.49729	4.9239	1.97169	0.979436	0.6164	0.939158
ENSMUSG00000076607	Igkj4	1.3892	0.935067	1.84333	1.97134	0.979177	0.904039	1
ENSMUSG00000094851		3.55666	2.39504	4.71828	1.97002	0.978212	0.407521	0.805559
ENSMUSG00000093507	Gm20627	2.93442	1.97655	3.89228	1.96923	0.977632	0.660557	0.959319
ENSMUSG00000070424	Art5	205.533	138.569	272.498	1.96652	0.975646	5.68747e-10	4.98182e-08
ENSMUSG00000038721	Hoxb7	4.16616	2.80937	5.52296	1.96591	0.975197	0.454582	0.841906
ENSMUSG00000087588	Gm16355	1.38653	0.935067	1.838	1.96564	0.974998	0.904015	1
ENSMUSG00000048108	Tmem72	1.3947	0.940736	1.84867	1.96513	0.974623	0.747074	0.989259
ENSMUSG00000087710		0.921359	0.621488	1.22123	1.96501	0.974536	1	1
ENSMUSG00000082176	Gm13163	2.30998	1.56072	3.05923	1.96014	0.970958	0.458673	0.845496
ENSMUSG00000065361		2.76774	1.87013	3.66534	1.95994	0.970806	0.747036	0.989259
ENSMUSG00000085631	9630028H03Rik	0.918693	0.621488	1.2159	1.95643	0.968223	1	1
ENSMUSG00000042477	Tfap2e	2.30806	1.56222	3.0539	1.95484	0.967051	0.711387	0.976272
ENSMUSG00000080485		2.30806	1.56222	3.0539	1.95484	0.967051	0.711387	0.976272
ENSMUSG00000085336	Gm11732	7.52462	5.09348	9.95577	1.95461	0.966882	0.0399228	0.210851
ENSMUSG00000079471	Gm7325	1.84213	1.24714	2.43713	1.95417	0.966556	0.507888	0.880341
ENSMUSG00000066629	Rpl36-ps3	9.96768	6.75379	13.1816	1.95173	0.964754	0.165612	0.513418
ENSMUSG00000026686	Lmx1a	0.768179	0.520741	1.01562	1.95033	0.963718	1	1
ENSMUSG00000086805	4932443L11Rik	9.50401	6.44322	12.5648	1.95008	0.963535	0.323109	0.726283
ENSMUSG00000035352	Ccl12	33.8535	22.964	44.743	1.9484	0.96229	0.00146996	0.0182191
ENSMUSG00000087384	Gm15558	5.37281	3.64519	7.10044	1.94789	0.961914	0.488192	0.866598
ENSMUSG00000068957	4930589L23Rik	0.916027	0.621488	1.21057	1.94785	0.961883	1	1
ENSMUSG00000079333	Gm11096	0.916027	0.621488	1.21057	1.94785	0.961883	1	1
ENSMUSG00000058281	Gm10038	1.8368	1.24714	2.42646	1.94562	0.96023	0.508192	0.880341
ENSMUSG00000085095	Gm15635	35.5443	24.1349	46.9537	1.94547	0.960118	0.00481028	0.0449602
ENSMUSG00000053461	Hhipl2	10.2552	6.96361	13.5468	1.94537	0.960042	0.0629557	0.287129
ENSMUSG00000035896	Rnase1	11.7782	7.99977	15.5567	1.94464	0.959504	0.319759	0.722489
ENSMUSG00000045201	Lrrc3b	1200.56	815.531	1585.59	1.94425	0.959211	2.87081e-22	1.22346e-19
ENSMUSG00000057716	Gm5567	6.58945	4.47801	8.7009	1.94303	0.958308	0.279449	0.676817
ENSMUSG00000051627	Hist1h1e	19.1258	12.9997	25.2519	1.9425	0.957918	0.0450586	0.228969
ENSMUSG00000023968	Crip3	15.0041	10.2047	19.8035	1.94063	0.956528	0.119893	0.426339
ENSMUSG00000090008	Gm16111	0.913361	0.621488	1.20523	1.93927	0.955514	1	1
ENSMUSG00000081605	Gm15953	19.0976	13.0068	25.1883	1.93654	0.95348	0.0583981	0.272799
ENSMUSG00000088185	Scarna2	55.6863	37.9315	73.441	1.93615	0.953189	0.000163359	0.00306019
ENSMUSG00000030699	Tbx6	75.9683	51.7595	100.177	1.93543	0.952656	1.54309e-05	0.000421137
ENSMUSG00000085774	Gm13055	3.2046	2.18371	4.22549	1.935	0.952335	0.67747	0.965183
ENSMUSG00000040264	Gbp5	334.185	227.756	440.613	1.93458	0.952023	9.47549e-11	9.54484e-09
ENSMUSG00000049404	Rarres1	43.7559	29.826	57.6859	1.93408	0.951647	0.00446678	0.0425573
ENSMUSG00000079227	Ccr5	131.332	89.5347	173.129	1.93365	0.951324	1.84573e-06	6.86296e-05
ENSMUSG00000065883		3.19852	2.18221	4.21482	1.93145	0.949684	0.479837	0.862372
ENSMUSG00000061242	Rpl21-ps7	5.16693	3.52593	6.80792	1.93082	0.94921	0.490069	0.867885
ENSMUSG00000086775	5730588L14Rik	0.918861	0.627157	1.21057	1.93024	0.948781	0.867429	1
ENSMUSG00000087545	Gm13966	1.36971	0.935067	1.80436	1.92966	0.948344	0.903855	1
ENSMUSG00000041481	Serpina3g	26.3338	17.9844	34.6832	1.92851	0.947488	0.0627501	0.286607
ENSMUSG00000092239	1700031A10Rik	2.27699	1.55505	2.99893	1.92851	0.947485	0.588359	0.92493
ENSMUSG00000030117	Gdf3	2.73601	1.86863	3.60338	1.92836	0.947372	0.529703	0.893799
ENSMUSG00000031738	Irx6	2.57999	1.76221	3.39777	1.92813	0.9472	0.614984	0.938798
ENSMUSG00000006269	Atp6v1b1	1.36629	0.933563	1.79903	1.92705	0.946397	0.567718	0.914431
ENSMUSG00000028715	Cyp4a14	2.58074	1.76372	3.39777	1.92648	0.945969	0.839797	1
ENSMUSG00000057719	Sh3rf2	432.462	295.638	569.286	1.92562	0.945322	6.4324e-14	1.09653e-11
ENSMUSG00000075549	Gm6878	1.2192	0.83432	1.60408	1.92262	0.943071	0.889006	1
ENSMUSG00000075611	Gm11545	2.87766	1.96938	3.78595	1.92241	0.942917	0.637984	0.948666
ENSMUSG00000026125	Prss39	0.916195	0.627157	1.20523	1.92174	0.942413	0.867506	1
ENSMUSG00000090202	4930503B20Rik	1.36438	0.935067	1.79369	1.91825	0.939792	0.903804	1
ENSMUSG00000021319	Sfrp4	12.9066	8.8511	16.9622	1.91639	0.938394	0.19923	0.570284
ENSMUSG00000047053	Teddm1	1.21653	0.83432	1.59875	1.91623	0.938268	0.889015	1
ENSMUSG00000092980		1.8099	1.24298	2.37682	1.9122	0.935235	0.92246	1
ENSMUSG00000079386	Gm3173	2.88333	1.98071	3.78595	1.91141	0.934635	0.412809	0.808842
ENSMUSG00000021903	Galntl2	1596.7	1096.88	2096.52	1.91136	0.934599	2.43859e-21	9.3175e-19
ENSMUSG00000058620	Adra2b	57.0318	39.2047	74.8589	1.90944	0.933149	0.000882228	0.0121209
ENSMUSG00000086767	Gm13070	7.55691	5.19874	9.91508	1.90721	0.931463	0.268512	0.66423
ENSMUSG00000086539	Gm16759	1.66755	1.1479	2.18721	1.9054	0.930094	0.775167	0.99748
ENSMUSG00000033200	Tpsg1	2.11232	1.4543	2.77033	1.90492	0.929731	0.55081	0.90401
ENSMUSG00000024366	Gfra3	52.2481	35.9828	68.5134	1.90406	0.929076	0.00448231	0.0426685
ENSMUSG00000053839	Gm9924	2.55784	1.76221	3.35346	1.90298	0.928263	0.615478	0.938798
ENSMUSG00000089941	Gm16168	29.2748	20.1693	38.3802	1.90291	0.928204	0.0222807	0.140124
ENSMUSG00000064452		5.7261	3.94593	7.50627	1.90228	0.927732	0.501493	0.876294
ENSMUSG00000055301	Adh7	1.36455	0.940736	1.78836	1.90102	0.926776	0.748143	0.9893
ENSMUSG00000092660		1.66489	1.1479	2.18187	1.90075	0.926572	0.775213	0.99748
ENSMUSG00000086944	Gm15859	4.36866	3.01236	5.72495	1.90049	0.926368	0.659427	0.959319
ENSMUSG00000055945	Prr18	19.7953	13.651	25.9397	1.9002	0.926152	0.035595	0.195204
ENSMUSG00000093139		15.3713	10.6058	20.1368	1.89866	0.92498	0.0262937	0.157299
ENSMUSG00000027313	Chac1	99.637	68.782	130.492	1.89718	0.923859	1.62818e-05	0.000442182
ENSMUSG00000091227	Gm3755	1.96256	1.35506	2.57005	1.89663	0.923441	0.796742	1
ENSMUSG00000024295	Cyp4f41-ps	9.93408	6.8602	13.008	1.89615	0.923071	0.18535	0.547906
ENSMUSG00000092563	Gm3617	2.26023	1.56222	2.95823	1.8936	0.921135	0.814448	1
ENSMUSG00000084979	Gm16267	10.5328	7.28286	13.7827	1.89248	0.920278	0.0615298	0.282897
ENSMUSG00000025500	1600016N20Rik	6.16323	4.26367	8.0628	1.89105	0.919185	0.249651	0.63982
ENSMUSG00000060678	Hist1h4c	2.99744	2.07429	3.92059	1.89009	0.918456	0.347176	0.751962
ENSMUSG00000040495	Chrm4	2.55609	1.76939	3.3428	1.88924	0.917807	0.730635	0.983158
ENSMUSG00000029923	Rab19	18.3098	12.6846	23.935	1.88694	0.916047	0.0477167	0.238594
ENSMUSG00000038094	Atp13a4	0.896538	0.621488	1.17159	1.88513	0.914668	1	1
ENSMUSG00000064329	Scn1a	8.99104	6.23605	11.746	1.88357	0.913469	0.418741	0.813449
ENSMUSG00000070167		9.89377	6.86286	12.9247	1.88328	0.913245	0.0662225	0.297016
ENSMUSG00000080530		1.64448	1.14073	2.14823	1.88321	0.913196	0.618227	0.939583
ENSMUSG00000087290	Gm15866	4.63467	3.21652	6.05283	1.8818	0.91211	0.364887	0.769492
ENSMUSG00000091686	4930471C04Rik	4.34031	3.01236	5.66826	1.88167	0.912011	0.729844	0.982688
ENSMUSG00000056673	Kdm5d	1544.88	1072.53	2017.24	1.88082	0.911359	4.13886e-12	5.52538e-10
ENSMUSG00000030672	Mylpf	73.6394	51.124	96.1549	1.88082	0.911359	0.000142756	0.0027367
ENSMUSG00000038175	Mylip	719.101	499.31	938.891	1.88038	0.911021	1.80391e-15	4.12127e-13
ENSMUSG00000040680	Kremen2	4.92968	3.42368	6.43567	1.87975	0.910544	0.383601	0.785528
ENSMUSG00000071586	Gm10337	6.88283	4.78291	8.98275	1.87809	0.909269	0.184129	0.545958
ENSMUSG00000052125	F730043M19Rik	193.109	134.232	251.986	1.87724	0.908614	3.05392e-09	2.27872e-07
ENSMUSG00000065513	Mir26a-1	0.893872	0.621488	1.16626	1.87655	0.908087	1	1
ENSMUSG00000021768	Dusp13	4.33368	3.01502	5.65233	1.87472	0.906676	0.273384	0.669503
ENSMUSG00000086493	Gm12204	1.63915	1.14073	2.13756	1.87386	0.906017	0.618494	0.939828
ENSMUSG00000020848	Doc2b	19.2656	13.414	25.1173	1.87247	0.904941	0.0674591	0.300797
ENSMUSG00000081189	Gm12725	1.78508	1.24298	2.32718	1.87227	0.904785	0.92191	1
ENSMUSG00000085802	Gm16059	19.2726	13.4227	25.1226	1.87165	0.904311	0.111589	0.408413
ENSMUSG00000064125	BC068157	22.3873	15.5932	29.1815	1.87142	0.904136	0.0260551	0.156351
ENSMUSG00000032268	Tmprss5	8.79332	6.12779	11.4589	1.86998	0.903024	0.0495861	0.245012
ENSMUSG00000032017	Grik4	6.40415	4.46366	8.34465	1.86946	0.902624	0.24624	0.635488
ENSMUSG00000085818	Gm13267	0.891206	0.621488	1.16092	1.86798	0.901475	1	1
ENSMUSG00000005338	Cadm3	143.652	100.199	187.106	1.86735	0.900993	2.00334e-06	7.38703e-05
ENSMUSG00000052363	Zdhhc19	1.63723	1.14223	2.13223	1.86673	0.900513	0.915191	1
ENSMUSG00000086654	Gm13165	4.02049	2.8052	5.23577	1.86645	0.900299	0.718401	0.977137
ENSMUSG00000028457	Atp8b5	32.3243	22.5602	42.0885	1.86561	0.899648	0.031592	0.178691
ENSMUSG00000049491	Slc36a3	0.746025	0.520741	0.971309	1.86524	0.899363	1	1
ENSMUSG00000054667	Irs4	0.746025	0.520741	0.971309	1.86524	0.899363	1	1
ENSMUSG00000084745		0.746025	0.520741	0.971309	1.86524	0.899363	1	1
ENSMUSG00000090334	Gm17149	1.33956	0.935067	1.74405	1.86516	0.899302	0.903562	1
ENSMUSG00000061486	Gm5161	4.46542	3.11727	5.81357	1.86495	0.899139	0.497658	0.87344
ENSMUSG00000025934	Gsta3	16.3806	11.439	21.3223	1.86401	0.89841	0.0987963	0.379318
ENSMUSG00000083339	Gm11693	2.97412	2.0773	3.87095	1.86346	0.897982	0.760925	0.992304
ENSMUSG00000081201	Smt3h2-ps4	1.19438	0.83432	1.55444	1.86312	0.897719	0.889096	1
ENSMUSG00000082052	Gm13819	1.19438	0.83432	1.55444	1.86312	0.897719	0.889096	1
ENSMUSG00000089292		1.19438	0.83432	1.55444	1.86312	0.897719	0.889096	1
ENSMUSG00000072898	Gm10434	5.21514	3.64369	6.78659	1.86256	0.897289	0.355367	0.759553
ENSMUSG00000086700	Gm15747	2.09109	1.46148	2.72069	1.8616	0.896546	0.687524	0.968936
ENSMUSG00000081123	Gm11469	32.287	22.5798	41.9942	1.85981	0.895156	0.00966108	0.0756802
ENSMUSG00000041052	Slc7a13	0.896707	0.627157	1.16626	1.85959	0.894985	0.868072	1
ENSMUSG00000085749	Gm12843	4.7421	3.32143	6.16277	1.85546	0.891775	0.227249	0.612287
ENSMUSG00000094164		0.743359	0.520741	0.965976	1.855	0.891421	1	1
ENSMUSG00000095276		0.743359	0.520741	0.965976	1.855	0.891421	1	1
ENSMUSG00000061311	Rag1	4.3051	3.01653	5.59368	1.85434	0.890908	0.421289	0.815342
ENSMUSG00000083992	Gm11478	80.2755	56.2518	104.299	1.85415	0.890755	3.24781e-05	0.000784893
ENSMUSG00000083240	Gm13453	3.70524	2.59653	4.81395	1.85399	0.890634	0.525783	0.891635
ENSMUSG00000045318	Adra2c	3.55264	2.49162	4.61367	1.85167	0.88883	0.784486	1
ENSMUSG00000049598	Vsig8	7.84267	5.50098	10.1844	1.85137	0.888596	0.341121	0.745154
ENSMUSG00000028777	Gnat3	14.685	10.3039	19.0661	1.85038	0.887821	0.127448	0.442542
ENSMUSG00000040490	Lrfn2	42.9756	30.1566	55.7945	1.85016	0.88765	0.00589362	0.052056
ENSMUSG00000056569	Mpz	12.7385	8.94016	16.5368	1.84972	0.887303	0.076584	0.324322
ENSMUSG00000038418	Egr1	4499.8	3158.54	5841.06	1.84929	0.886971	3.24594e-26	1.84444e-23
ENSMUSG00000095674		2.36093	1.6573	3.06456	1.84913	0.886846	0.937093	1
ENSMUSG00000036560	Lgi4	52.2188	36.6737	67.7639	1.84775	0.88577	0.0107121	0.0822557
ENSMUSG00000095547	Gm11167	29.3843	20.6395	38.1292	1.84739	0.885489	0.00355079	0.0358541
ENSMUSG00000095547	Gm10719	29.3843	20.6395	38.1292	1.84739	0.885489	0.00355079	0.0358541
ENSMUSG00000058925	1700011I03Rik	3.54598	2.49428	4.59767	1.84328	0.882279	0.316944	0.719466
ENSMUSG00000040950	Mgl2	48.4671	34.0962	62.838	1.84297	0.882029	0.000366773	0.00589845
ENSMUSG00000051985	Igfn1	2.50467	1.76221	3.24713	1.84264	0.881778	0.708869	0.975851
ENSMUSG00000022508	Bcl6	574.024	403.896	744.152	1.84244	0.881615	4.42121e-16	1.08865e-13
ENSMUSG00000044165	Bcl2l15	6.05701	4.26217	7.85185	1.84222	0.881446	0.184243	0.546222
ENSMUSG00000010651	Acaa1b	13.2813	9.34882	17.2138	1.84128	0.880713	0.102343	0.387301
ENSMUSG00000088695		1.91466	1.34789	2.48144	1.84098	0.880475	0.656001	0.95862
ENSMUSG00000055872	Gm9985	5.73941	4.04517	7.43364	1.83766	0.87787	0.433599	0.825302
ENSMUSG00000058914	C1qtnf3	87.8151	61.9278	113.702	1.83605	0.876603	0.000752265	0.0105919
ENSMUSG00000058253	BC016201	32.7354	23.0919	42.379	1.83523	0.875962	0.00896869	0.0716235
ENSMUSG00000080406	Mir1188	1.91275	1.34939	2.4761	1.83498	0.875762	0.924633	1
ENSMUSG00000003206	Ebi3	37.0077	26.1103	47.9051	1.83472	0.875562	0.0213611	0.135834
ENSMUSG00000040896	Kcnd3	235.18	166.008	304.352	1.83336	0.874487	1.3184e-08	8.59327e-07
ENSMUSG00000089789	Rdh1	12.0597	8.51299	15.6063	1.83324	0.874393	0.0968105	0.375218
ENSMUSG00000046818	Ddit4l	138.111	97.5867	178.636	1.83053	0.872264	2.47529e-06	8.80496e-05
ENSMUSG00000007877	Tcap	13512.6	9558.03	17467.2	1.82749	0.869864	4.68241e-25	2.41318e-22
ENSMUSG00000082756	Gm14888	1.91558	1.35506	2.4761	1.8273	0.869714	0.79705	1
ENSMUSG00000093074		2.20792	1.56222	2.85362	1.82664	0.869192	0.814421	1
ENSMUSG00000094733	Gm5416	3.52457	2.49579	4.55336	1.82442	0.867438	0.50269	0.876314
ENSMUSG00000085632	Gm12381	34.9583	24.7692	45.1474	1.82272	0.866095	0.0112531	0.0851999
ENSMUSG00000071551	Akr1c19	197.338	139.926	254.751	1.82061	0.864423	1.40066e-08	9.07604e-07
ENSMUSG00000082234	Gm16221	1.46648	1.03998	1.89298	1.82021	0.864102	0.560324	0.909565
ENSMUSG00000066677	Pydc3	17.267	12.2491	22.2849	1.81931	0.863394	0.156851	0.498128
ENSMUSG00000083019	Gm6222	1.75957	1.24865	2.27049	1.81836	0.862641	0.917109	1
ENSMUSG00000084544		13.9146	9.87974	17.9495	1.8168	0.861399	0.245368	0.634715
ENSMUSG00000038754	Elovl3	1.17489	0.83432	1.51546	1.8164	0.861083	0.889168	1
ENSMUSG00000086546	Gm13709	1.17489	0.83432	1.51546	1.8164	0.861083	0.889168	1
ENSMUSG00000042425	Frmpd3	54.7426	38.8998	70.5855	1.81455	0.859609	0.00240678	0.0266334
ENSMUSG00000082186	Gm12403	4.67211	3.32143	6.0228	1.81332	0.85863	0.265746	0.661114
ENSMUSG00000066714	Gm8062	1.31313	0.933563	1.6927	1.81316	0.858504	0.696792	0.9718
ENSMUSG00000086186	1700024P03Rik	1.46456	1.04148	1.88764	1.81246	0.857948	0.904712	1
ENSMUSG00000009092	Derl3	19.2796	13.7147	24.8444	1.81151	0.857193	0.0855776	0.347915
ENSMUSG00000045394	Epcam	1.16406	0.828651	1.49946	1.80952	0.85561	1	1
ENSMUSG00000035228	Ccdc106	62.2302	44.3215	80.1388	1.80812	0.854493	0.00330323	0.0339374
ENSMUSG00000032174	Icam5	5.54	3.94593	7.13408	1.80796	0.854364	0.557933	0.908543
ENSMUSG00000086565	Gm13133	2.76423	1.96938	3.55907	1.80721	0.853763	0.639754	0.94963
ENSMUSG00000085444	Gm13936	2.34178	1.66864	3.01492	1.80681	0.853448	0.710946	0.976272
ENSMUSG00000085100	Gm13324	2.33361	1.66297	3.00426	1.80656	0.853246	0.828135	1
ENSMUSG00000034614	Pik3ip1	1565.5	1115.77	2015.23	1.80614	0.852908	2.60013e-19	8.00298e-17
ENSMUSG00000026424	Gpr37l1	12.8276	9.14316	16.5121	1.80595	0.852756	0.166413	0.514851
ENSMUSG00000094320	Gm13202	4.52471	3.22519	5.82423	1.80586	0.852682	0.659287	0.959319
ENSMUSG00000048337	Ppyr1	20.5516	14.6495	26.4537	1.80578	0.852624	0.0240298	0.148047
ENSMUSG00000087361	0610043K17Rik	9.03627	6.44171	11.6308	1.80555	0.852437	0.335681	0.739906
ENSMUSG00000084601		2.1911	1.56222	2.81998	1.8051	0.852081	0.81441	1
ENSMUSG00000032380	Dapk2	280.941	200.346	361.537	1.80456	0.85165	1.71836e-09	1.35037e-07
ENSMUSG00000085102	1700010K24Rik	4.37878	3.12294	5.63462	1.80426	0.851411	0.476388	0.860499
ENSMUSG00000096361		5.68744	4.05651	7.31837	1.80411	0.851283	0.306869	0.70861
ENSMUSG00000041791	Capza3	1.16956	0.83432	1.5048	1.80362	0.850895	0.889187	1
ENSMUSG00000057370	Rpl21-ps12	1.16956	0.83432	1.5048	1.80362	0.850895	0.889187	1
ENSMUSG00000073482	Gm10517	2.18768	1.56072	2.81464	1.80343	0.85074	0.547738	0.902222
ENSMUSG00000081311	Gm12197	7.85871	5.60739	10.11	1.80298	0.850385	0.377551	0.779557
ENSMUSG00000039330	Tsga10ip	2.3357	1.66714	3.00426	1.80205	0.849637	0.457515	0.844849
ENSMUSG00000026692	Fmo4	33.6556	24.0228	43.2883	1.80197	0.849574	0.018255	0.120653
ENSMUSG00000085885	Gm11906	2.61638	1.86863	3.36413	1.80032	0.848252	0.614179	0.938549
ENSMUSG00000051262	Cml3	1.01888	0.727904	1.30985	1.79948	0.847579	1	1
ENSMUSG00000055033	Olfr420	1.01888	0.727904	1.30985	1.79948	0.847579	1	1
ENSMUSG00000086514	Gm11747	13.8122	9.8699	17.7546	1.79886	0.847081	0.403153	0.802947
ENSMUSG00000077704	Snord89	9.14586	6.54396	11.7478	1.7952	0.844148	0.478017	0.861549
ENSMUSG00000028784	Spocd1	1.01621	0.727904	1.30452	1.79215	0.841694	1	1
ENSMUSG00000072941	Sod3	1035.65	742.162	1329.14	1.79091	0.840691	6.38497e-17	1.68449e-14
ENSMUSG00000048281	Dleu7	3.90602	2.79953	5.01251	1.79048	0.840349	0.88123	1
ENSMUSG00000025927	Tfap2b	3.63009	2.6022	4.65798	1.79001	0.83997	0.500563	0.875462
ENSMUSG00000070908	Gm13288	2.45845	1.76372	3.15318	1.7878	0.838189	0.93948	1
ENSMUSG00000071335	G630090E17Rik	113.395	81.355	145.434	1.78765	0.838065	2.75127e-05	0.000686609
ENSMUSG00000090104	Gm16241	1.8881	1.35506	2.42113	1.78673	0.837323	0.797231	1
ENSMUSG00000042268	Slc26a9	5.9408	4.26367	7.61793	1.78671	0.837303	0.323603	0.726951
ENSMUSG00000030905	Crym	5.51285	3.95726	7.06844	1.78619	0.836889	0.417514	0.813308
ENSMUSG00000085754	Gm15886	3.3385	2.39654	4.28046	1.7861	0.836811	0.676648	0.965183
ENSMUSG00000066319	Rtp3	122.358	87.8619	156.854	1.78523	0.836111	5.54528e-05	0.00124318
ENSMUSG00000076749	Gm17004	3.32692	2.38937	4.26447	1.78477	0.835734	0.577096	0.919765
ENSMUSG00000092577	Gm7393	2.31337	1.66147	2.96528	1.78474	0.835712	0.587218	0.924571
ENSMUSG00000075224	Lrrc55	363.488	261.1	465.876	1.78428	0.835341	1.06891e-10	1.06703e-08
ENSMUSG00000053199	Arhgap20	822.023	591.249	1052.8	1.78063	0.832389	3.05176e-15	6.44096e-13
ENSMUSG00000066975	Cryba4	123.726	88.994	158.457	1.78054	0.832315	2.04723e-05	0.00053564
ENSMUSG00000000215	Ins2	3.32975	2.39504	4.26447	1.78054	0.832315	0.476515	0.860499
ENSMUSG00000021986	Fam123a	0.72387	0.520741	0.926999	1.78015	0.832002	1	1
ENSMUSG00000087364	Gm13398	0.72387	0.520741	0.926999	1.78015	0.832002	1	1
ENSMUSG00000088229		0.72387	0.520741	0.926999	1.78015	0.832002	1	1
ENSMUSG00000031897	Psmb10	2055.61	1479.28	2631.93	1.77919	0.831223	6.28775e-19	1.8579e-16
ENSMUSG00000022357	Klhl38	433.647	312.23	555.064	1.77774	0.830044	3.45639e-12	4.69921e-10
ENSMUSG00000020798	Spns3	5.04543	3.63385	6.457	1.7769	0.829366	0.757882	0.992304
ENSMUSG00000033510	Otud7a	7.64526	5.50665	9.78387	1.77674	0.829231	0.329339	0.733148
ENSMUSG00000047507	Baiap3	14.7089	10.5963	18.8216	1.77624	0.828827	0.300172	0.701038
ENSMUSG00000077387		5.48253	3.95159	7.01347	1.77485	0.827694	0.487208	0.865986
ENSMUSG00000064567		2.88198	2.0773	3.68667	1.77474	0.827611	0.850515	1
ENSMUSG00000084628		1.43691	1.03581	1.838	1.77445	0.827375	1	1
ENSMUSG00000055809	6030429G01Rik	384.028	276.945	491.111	1.77332	0.826449	3.39681e-10	3.08511e-08
ENSMUSG00000024176	Sox8	30.0909	21.7112	38.4707	1.77193	0.825324	0.0160967	0.110191
ENSMUSG00000040276	Pacsin1	8.91948	6.4387	11.4003	1.77058	0.824225	0.180199	0.539209
ENSMUSG00000041377	Ninj2	0.721204	0.520741	0.921667	1.76991	0.823679	1	1
ENSMUSG00000072423	Psmb11	0.721204	0.520741	0.921667	1.76991	0.823679	1	1
ENSMUSG00000085816	Gm13052	0.721204	0.520741	0.921667	1.76991	0.823679	1	1
ENSMUSG00000076430	Hus1b	4.60107	3.32293	5.87921	1.76928	0.823164	0.416007	0.81183
ENSMUSG00000086047	9530046B11Rik	28.0735	20.287	35.86	1.76763	0.821818	0.046931	0.235783
ENSMUSG00000062383	B130024G19Rik	25.8964	18.7192	33.0737	1.76684	0.821169	0.0573299	0.269514
ENSMUSG00000019301	Hsd17b1	6.63659	4.79725	8.47592	1.76683	0.821162	0.352221	0.756528
ENSMUSG00000035775	Krt20	7.1808	5.19457	9.16703	1.76473	0.81945	0.510243	0.881539
ENSMUSG00000075416	Gm14488	9.06649	6.56247	11.5705	1.76313	0.818141	0.428802	0.821814
ENSMUSG00000089797	Gm16118	2.15828	1.56222	2.75434	1.76309	0.818104	0.814387	1
ENSMUSG00000049653	Spatc1	4.60274	3.33161	5.87388	1.76307	0.818093	0.659206	0.959319
ENSMUSG00000081339	Gm16044	5.6212	4.06935	7.17306	1.7627	0.81779	0.349176	0.753759
ENSMUSG00000080760	Gm7571	1.14457	0.828651	1.46049	1.76249	0.817613	1	1
ENSMUSG00000020548	1700086D15Rik	2.58089	1.86863	3.29316	1.76234	0.817491	0.614964	0.938798
ENSMUSG00000069045	Ddx3y	4662.25	3376.69	5947.82	1.76144	0.816751	2.83188e-11	3.13787e-09
ENSMUSG00000032015	Pou2f3	12.1961	8.83374	15.5584	1.76125	0.816596	0.123559	0.43422
ENSMUSG00000022860	Chodl	9.47058	6.8602	12.081	1.76102	0.816412	0.260468	0.654867
ENSMUSG00000072919	4933437F05Rik	26.2696	19.0312	33.508	1.76068	0.816135	0.0379864	0.204374
ENSMUSG00000026188	Tmem169	7.61458	5.51798	9.71118	1.75991	0.815506	0.267916	0.663592
ENSMUSG00000087258	Gm15461	0.718538	0.520741	0.916335	1.75967	0.815308	1	1
ENSMUSG00000049387	Cox7b2	4.876	3.53426	6.21775	1.75928	0.814983	0.224459	0.607974
ENSMUSG00000064802		5.59605	4.05801	7.13408	1.75802	0.813955	0.486203	0.865347
ENSMUSG00000047394	Odf3b	32.9827	23.9179	42.0476	1.758	0.813932	0.0286341	0.166945
ENSMUSG00000038253	Hoxa5	26.8305	19.4599	34.201	1.75751	0.813536	0.0530386	0.255797
ENSMUSG00000028460	Sit1	1.28906	0.935067	1.64305	1.75715	0.81324	1	1
ENSMUSG00000083305	Gm13315	1.28906	0.935067	1.64305	1.75715	0.81324	1	1
ENSMUSG00000094525		1.15007	0.83432	1.46582	1.7569	0.813034	0.889259	1
ENSMUSG00000034762	Glis1	8.44696	6.12813	10.7658	1.75678	0.812933	0.398799	0.798643
ENSMUSG00000041750	Cd1d2	7.88849	5.72364	10.0533	1.75646	0.812669	0.220907	0.602809
ENSMUSG00000020447	Npc1l1	26.0506	18.9105	33.1908	1.75515	0.811596	0.0316272	0.178798
ENSMUSG00000056973	Ces1d	145.589	105.699	185.478	1.75478	0.811291	2.62313e-06	9.27134e-05
ENSMUSG00000096299		1.86594	1.35506	2.37682	1.75403	0.810675	0.797377	1
ENSMUSG00000077271		2.43646	1.76939	3.10354	1.75402	0.810666	0.828752	1
ENSMUSG00000078722	Gm12394	6.5901	4.78591	8.39429	1.75396	0.810613	0.474599	0.859541
ENSMUSG00000086206	Gm13783	3.58312	2.6022	4.56403	1.75391	0.810574	0.501503	0.876294
ENSMUSG00000085971	Gm15411	4.16256	3.0237	5.30141	1.75329	0.810061	0.631019	0.945824
ENSMUSG00000034968	Lbx2	25.2968	18.3829	32.2106	1.75221	0.809172	0.114925	0.415948
ENSMUSG00000082561	Gm15580	2.28428	1.65996	2.90859	1.7522	0.809171	0.400428	0.80017
ENSMUSG00000087090	Nctc1	1.1474	0.83432	1.46049	1.75051	0.807776	0.889269	1
ENSMUSG00000001496	Nkx2-1	5.57847	4.05651	7.10044	1.75038	0.80767	0.349806	0.754636
ENSMUSG00000022525	Hrasls	228.485	166.155	290.815	1.75026	0.80757	1.12e-08	7.49862e-07
ENSMUSG00000050645	Defb19	7.5631	5.50364	9.62256	1.7484	0.806036	0.184085	0.545901
ENSMUSG00000014030	Pax5	9.41079	6.84886	11.9727	1.74813	0.805815	0.312895	0.715
ENSMUSG00000027524	Edn3	11.8288	8.61675	15.0409	1.74554	0.803676	0.242456	0.630863
ENSMUSG00000037747	Phyhipl	3.27994	2.38937	4.17051	1.74544	0.803595	0.577866	0.920405
ENSMUSG00000088157		1.71184	1.24714	2.17654	1.74522	0.803413	0.614931	0.938798
ENSMUSG00000096233	Gm13238	5.56856	4.05801	7.07911	1.74448	0.802795	0.486445	0.8655
ENSMUSG00000050994	9130014G24Rik	7.99097	5.82589	10.1561	1.74326	0.801788	0.293121	0.693045
ENSMUSG00000095329	Gm17330	0.995969	0.7264	1.26554	1.74221	0.800915	0.631761	0.946136
ENSMUSG00000085698	Gm16022	11.1087	8.10885	14.1086	1.7399	0.799003	0.251554	0.64235
ENSMUSG00000036218	Pdzrn4	111.019	81.0459	140.993	1.73967	0.798812	9.36405e-06	0.000271619
ENSMUSG00000068629	Gm6155	2.13879	1.56222	2.71536	1.73814	0.797542	0.814371	1
ENSMUSG00000024678	Ms4a4d	163.592	119.506	207.678	1.73781	0.797272	3.10717e-05	0.000758348
ENSMUSG00000089711	Gm16240	3.1321	2.28862	3.97557	1.7371	0.79668	0.552758	0.905454
ENSMUSG00000026971	Itgb6	1120.16	819.141	1421.18	1.73497	0.794907	2.8188e-15	6.06481e-13
ENSMUSG00000044912	Syt16	0.993303	0.7264	1.26021	1.73487	0.794824	0.632039	0.946136
ENSMUSG00000086658	Gm14260	0.993303	0.7264	1.26021	1.73487	0.794824	0.632039	0.946136
ENSMUSG00000058579	Cela2a	2.13613	1.56222	2.71003	1.73472	0.794707	0.814369	1
ENSMUSG00000053004	Hrh1	5.54565	4.05651	7.0348	1.7342	0.794271	0.350293	0.755318
ENSMUSG00000063522	2010109I03Rik	6.81164	4.9844	8.63888	1.73318	0.793424	0.311519	0.713991
ENSMUSG00000084050	Gm14439	16.6324	12.171	21.0937	1.73311	0.793364	0.108155	0.400671
ENSMUSG00000031957	Ctrb1	1.41475	1.03581	1.79369	1.73168	0.792169	1	1
ENSMUSG00000026650	Meig1	19.7427	14.4566	25.0287	1.73129	0.791849	0.0412951	0.21548
ENSMUSG00000086154	Gm16196	0.994055	0.727904	1.26021	1.73128	0.79184	1	1
ENSMUSG00000086409	Gm13898	0.994055	0.727904	1.26021	1.73128	0.79184	1	1
ENSMUSG00000040935	Padi6	2.83426	2.07579	3.59272	1.73077	0.791414	0.638655	0.948927
ENSMUSG00000051900	Abca16	2.83426	2.07579	3.59272	1.73077	0.791414	0.638655	0.948927
ENSMUSG00000039321	Uts2r	20.3011	14.8755	25.7268	1.72947	0.790334	0.098483	0.378969
ENSMUSG00000092277	Gm19684	2.41431	1.76939	3.05923	1.72898	0.78992	0.828624	1
ENSMUSG00000029417	Cxcl9	125.811	92.2343	159.388	1.72808	0.789171	2.21491e-05	0.000574763
ENSMUSG00000084292	Gm13535	0.990637	0.7264	1.25487	1.72753	0.788707	0.632317	0.946136
ENSMUSG00000008843	Cldn13	1.42025	1.04148	1.79903	1.72737	0.788577	0.904324	1
ENSMUSG00000022445	Cyp2d26	1.42025	1.04148	1.79903	1.72737	0.788577	0.904324	1
ENSMUSG00000083917	Gm12093	1.56475	1.1479	1.98159	1.72628	0.787666	0.905521	1
ENSMUSG00000086982	Gm8327	36.8223	27.0348	46.6098	1.72407	0.785815	0.0107491	0.0824547
ENSMUSG00000081771	Gm15381	0.991389	0.727904	1.25487	1.72396	0.785723	1	1
ENSMUSG00000085398	4931406G06Rik	0.991389	0.727904	1.25487	1.72396	0.785723	1	1
ENSMUSG00000034416	Pkd1l2	5.66058	4.15876	7.16239	1.72224	0.784289	0.557362	0.908471
ENSMUSG00000089989	Flt3l	294.497	216.366	372.628	1.72221	0.784262	1.1375e-08	7.59284e-07
ENSMUSG00000026114	Cnga3	32.1469	23.6255	40.6684	1.72138	0.783564	0.0164155	0.111899
ENSMUSG00000034829	Nxnl1	5.94778	4.37159	7.52398	1.72111	0.783338	0.448747	0.836729
ENSMUSG00000091712	Sec14l5	36.6189	26.9314	46.3064	1.71942	0.781923	0.0142635	0.100763
ENSMUSG00000044338	Aplnr	13149.6	9674.32	16624.8	1.71845	0.781107	4.15225e-19	1.24349e-16
ENSMUSG00000082510	Gm11793	1.69502	1.24714	2.1429	1.71825	0.780937	0.61574	0.938798
ENSMUSG00000061013	Mkx	25.9693	19.1131	32.8255	1.71743	0.780253	0.017728	0.118334
ENSMUSG00000036557	1700011E24Rik	1.41492	1.04148	1.78836	1.71713	0.779999	0.904276	1
ENSMUSG00000058183	Mmel1	14.1042	10.3831	17.8253	1.71675	0.779683	0.130144	0.447916
ENSMUSG00000075010	AW112010	238.639	175.761	301.516	1.71549	0.778622	1.15262e-07	5.91722e-06
ENSMUSG00000092556	Olfr755-ps1	1.26957	0.935067	1.60408	1.71547	0.778603	1	1
ENSMUSG00000025588	Nat1	10.3113	7.59528	13.0273	1.71519	0.778365	0.299314	0.699621
ENSMUSG00000027690	Slc2a2	9.04982	6.66739	11.4323	1.71465	0.777917	0.335598	0.739871
ENSMUSG00000058935	1700018C11Rik	7.89107	5.81571	9.96644	1.71371	0.777122	0.126125	0.43913
ENSMUSG00000082857	Gm12293	1.69311	1.24865	2.13756	1.71191	0.775604	0.916092	1
ENSMUSG00000010086	Rnf112	10.2839	7.5866	12.9813	1.71108	0.774909	0.215509	0.595993
ENSMUSG00000024388	Myo7b	51.4134	37.9288	64.898	1.71105	0.774878	0.00562149	0.0502533
ENSMUSG00000032878	Ccdc85a	692.36	510.885	873.836	1.71044	0.774365	1.37086e-11	1.68776e-09
ENSMUSG00000060284	Sp7	4.80055	3.54294	6.05816	1.70992	0.773933	0.436503	0.827369
ENSMUSG00000091611	Gm9364	1.68969	1.24714	2.13223	1.7097	0.77374	0.615999	0.938998
ENSMUSG00000087467	Gm13601	1.26349	0.933563	1.59341	1.70681	0.771302	0.699585	0.972971
ENSMUSG00000084168	Atp5l2	9.584	7.08171	12.0863	1.70669	0.771201	0.38953	0.791162
ENSMUSG00000090799	Klhl33	134.583	99.4677	169.699	1.70607	0.770678	2.98588e-05	0.00073604
ENSMUSG00000086771	1700080G11Rik	3.65906	2.70445	4.61367	1.70595	0.770577	0.785241	1
ENSMUSG00000047658	Gal3st3	761.611	563.012	960.21	1.70549	0.770183	6.13815e-13	9.44635e-11
ENSMUSG00000080885	Gm4167	37.6917	27.8695	47.5139	1.70487	0.769663	0.0338119	0.187937
ENSMUSG00000031147	Magix	884.12	653.791	1114.45	1.7046	0.76943	5.2765e-13	8.29308e-11
ENSMUSG00000047841	BC051628	2.39215	1.76939	3.01492	1.70394	0.768872	0.828493	1
ENSMUSG00000078958	Atp6ap1l	21.7739	16.1068	27.4411	1.7037	0.768671	0.0569442	0.268213
ENSMUSG00000074354	9230115E21Rik	5.89712	4.36592	7.42831	1.70143	0.766749	0.57017	0.915914
ENSMUSG00000062444	Ap3b2	2.81141	2.08146	3.54136	1.70138	0.766708	0.610031	0.93651
ENSMUSG00000077449		1.54242	1.14223	1.94262	1.70072	0.766149	1	1
ENSMUSG00000087968		3.93666	2.91578	4.95754	1.70024	0.765742	0.522032	0.888606
ENSMUSG00000085228	Gm14376	2.65609	1.96938	3.3428	1.69739	0.763318	0.729977	0.982688
ENSMUSG00000016496	Cd274	187.434	138.974	235.893	1.69739	0.763315	4.292e-06	0.000136999
ENSMUSG00000092392	Gm20546	19.9246	14.7762	25.0729	1.69684	0.762851	0.158154	0.499623
ENSMUSG00000073125	Xlr3b	259.578	192.551	326.605	1.6962	0.762308	0.000139877	0.00269315
ENSMUSG00000042532	Golga7b	27.1852	20.1678	34.2027	1.69591	0.762057	0.0671919	0.299968
ENSMUSG00000056966	Gjc3	23.8151	17.669	29.9612	1.69569	0.761876	0.0537376	0.258095
ENSMUSG00000083090	Gm11736	0.701716	0.520741	0.88269	1.69506	0.761341	1	1
ENSMUSG00000084822	Gm11768	23.2636	17.275	29.2521	1.69332	0.759854	0.164266	0.511064
ENSMUSG00000081929	Gm11741	2.24697	1.66864	2.82531	1.69318	0.759735	0.814442	1
ENSMUSG00000094638		13.145	9.76198	16.528	1.6931	0.759665	0.454898	0.841927
ENSMUSG00000028950	Tas1r1	14.5537	10.8088	18.2987	1.69295	0.759536	0.128317	0.443874
ENSMUSG00000026527	Rgs7	57.9008	43.0023	72.7993	1.69292	0.75951	0.00134658	0.0170523
ENSMUSG00000054065	Pkp3	9.51026	7.06887	11.9516	1.69074	0.757658	0.427376	0.821074
ENSMUSG00000059864	Olfr1393	32.1623	23.9077	40.4169	1.69054	0.757482	0.0216608	0.137464
ENSMUSG00000053765	Oas1f	1.40077	1.04148	1.76005	1.68995	0.756976	0.904147	1
ENSMUSG00000062961	Gm1568	7.40808	5.51081	9.30535	1.68856	0.755796	0.254672	0.646936
ENSMUSG00000036872	Abcc12	6.70234	4.98741	8.41727	1.6877	0.755062	0.603632	0.933177
ENSMUSG00000036390	Gadd45a	596.221	443.697	748.745	1.68751	0.754899	1.40934e-11	1.72555e-09
ENSMUSG00000039496	Cdnf	492.535	366.667	618.403	1.68655	0.754077	3.7929e-09	2.74688e-07
ENSMUSG00000093697	Gm20686	10.3416	7.70019	12.983	1.68606	0.753659	0.225839	0.610039
ENSMUSG00000052713	Zfp608	1686.54	1255.95	2117.13	1.68568	0.753331	2.68432e-14	4.9163e-12
ENSMUSG00000062496	4930431F12Rik	0.69905	0.520741	0.877358	1.68483	0.752599	1	1
ENSMUSG00000082203	Gm15636	0.69905	0.520741	0.877358	1.68483	0.752599	1	1
ENSMUSG00000044933	Sstr3	134.398	100.153	168.643	1.68385	0.751761	3.29914e-05	0.000792115
ENSMUSG00000082465	Rps6-ps3	4.17711	3.11311	5.24111	1.68356	0.751515	0.887442	1
ENSMUSG00000062785	Kcnc3	41.557	30.9777	52.1363	1.68303	0.751057	0.0065462	0.0564257
ENSMUSG00000071265	1700086L19Rik	1.39468	1.03998	1.74938	1.68213	0.750293	0.565558	0.912753
ENSMUSG00000031772	Cntnap4	0.973815	0.7264	1.22123	1.68121	0.749498	0.634097	0.946508
ENSMUSG00000043219	Hoxa6	9.23165	6.88739	11.5759	1.68074	0.749096	0.345798	0.750268
ENSMUSG00000086706	Gm15848	1.66545	1.24298	2.08792	1.67978	0.748271	1	1
ENSMUSG00000074678	Defb25	2.36108	1.76221	2.95995	1.67968	0.748184	0.710695	0.976157
ENSMUSG00000073795	6430531B16Rik	3.61383	2.69728	4.53038	1.67961	0.748128	0.69216	0.969719
ENSMUSG00000082884	Gm13339	36557.1	27294.6	45819.6	1.6787	0.747348	6.6772e-20	2.27651e-17
ENSMUSG00000034683	Ppp1r1c	1.6702	1.24714	2.09326	1.67844	0.747123	0.616951	0.939416
ENSMUSG00000017344	Vtn	1546	1154.5	1937.5	1.67821	0.746927	2.91146e-14	5.24561e-12
ENSMUSG00000053368	Rxfp2	0.974567	0.727904	1.22123	1.67773	0.746514	1	1
ENSMUSG00000076949		8.08504	6.03873	10.1314	1.67773	0.746511	0.325629	0.729052
ENSMUSG00000068457	Uty	1529.72	1142.62	1916.82	1.67757	0.746374	1.49974e-07	7.48553e-06
ENSMUSG00000053244	Gm9901	3.75374	2.8052	4.70229	1.67628	0.745259	0.87643	1
ENSMUSG00000087380	2210408F21Rik	181.228	135.441	227.015	1.67611	0.745119	4.74637e-06	0.000150049
ENSMUSG00000073610	Gm10549	15.9682	11.9397	19.9967	1.67481	0.744	0.200274	0.5718
ENSMUSG00000087240	Gm15976	1.39277	1.04148	1.74405	1.67459	0.743804	0.904073	1
ENSMUSG00000027871	Hsd3b1	0.696384	0.520741	0.872026	1.67459	0.743804	1	1
ENSMUSG00000048824	Gm568	0.696384	0.520741	0.872026	1.67459	0.743804	1	1
ENSMUSG00000056031	9330154J02Rik	0.696384	0.520741	0.872026	1.67459	0.743804	1	1
ENSMUSG00000079531	Gm5936	0.696384	0.520741	0.872026	1.67459	0.743804	1	1
ENSMUSG00000094088		0.696384	0.520741	0.872026	1.67459	0.743804	1	1
ENSMUSG00000045551	Fpr1	8.90886	6.66739	11.1503	1.67237	0.741894	0.370797	0.773457
ENSMUSG00000053318	Slamf8	3.75316	2.80937	4.69695	1.67189	0.741481	0.595303	0.926976
ENSMUSG00000091996	BC049352	3.18972	2.38787	3.99156	1.6716	0.741232	0.444623	0.833211
ENSMUSG00000051648	Kctd19	2.92387	2.18938	3.65836	1.67095	0.740672	0.746763	0.989259
ENSMUSG00000051079	Rgs13	0.971901	0.727904	1.2159	1.67041	0.740201	1	1
ENSMUSG00000036192	Rorb	86.0812	64.4761	107.686	1.67017	0.739997	0.00139933	0.0175299
ENSMUSG00000073242	Gm10485	5.83615	4.37159	7.30072	1.67004	0.73988	0.5007	0.875493
ENSMUSG00000009214	Tmem8c	5.82799	4.36592	7.29005	1.66976	0.739643	0.570394	0.915914
ENSMUSG00000040564	Apoc1	4.03493	3.0237	5.04616	1.66887	0.73887	0.706064	0.974791
ENSMUSG00000088373	Mir1956	1.67379	1.25431	2.09326	1.66884	0.738849	0.775058	0.99748
ENSMUSG00000069049	Eif2s3y	4766.55	3573.52	5959.59	1.66771	0.737868	1.22794e-08	8.07489e-07
ENSMUSG00000085516	4930538E20Rik	3.33038	2.49729	4.16347	1.66719	0.737422	0.862152	1
ENSMUSG00000088475		4.70732	3.5301	5.88454	1.66696	0.737222	0.494544	0.870915
ENSMUSG00000072770	Acrbp	273.781	205.327	342.234	1.66678	0.73706	3.18106e-08	1.89504e-06
ENSMUSG00000062345	Serpinb2	0.968483	0.7264	1.21057	1.66653	0.736845	0.634669	0.94694
ENSMUSG00000077925	Mir453	0.968483	0.7264	1.21057	1.66653	0.736845	0.634669	0.94694
ENSMUSG00000089286		0.968483	0.7264	1.21057	1.66653	0.736845	0.634669	0.94694
ENSMUSG00000036995	Asap3	1119.09	839.444	1398.73	1.66626	0.736611	5.35232e-13	8.353e-11
ENSMUSG00000024901	Peli3	22.0167	16.5181	27.5154	1.66577	0.736192	0.0416112	0.216517
ENSMUSG00000031111	Igsf1	544.45	408.571	680.328	1.66514	0.735642	2.93403e-12	4.08938e-10
ENSMUSG00000024518	Rax	1.244	0.933563	1.55444	1.66506	0.735573	0.700717	0.973133
ENSMUSG00000026614	Slc30a10	3.87543	2.90861	4.84226	1.6648	0.735352	0.431911	0.824237
ENSMUSG00000082254	Gm11922	0.693718	0.520741	0.866694	1.66435	0.734956	1	1
ENSMUSG00000030361	Klrb1a	0.969235	0.727904	1.21057	1.66308	0.733861	1	1
ENSMUSG00000066092	Gm10152	0.969235	0.727904	1.21057	1.66308	0.733861	1	1
ENSMUSG00000086279	Gm15634	0.969235	0.727904	1.21057	1.66308	0.733861	1	1
ENSMUSG00000029683	Lmod2	18566.2	13944.6	23187.8	1.66285	0.733659	9.70795e-19	2.75818e-16
ENSMUSG00000024903	Lao1	2.48533	1.86713	3.10354	1.6622	0.733096	0.451063	0.838677
ENSMUSG00000024486	Hbegf	1273.97	957.552	1590.38	1.66089	0.731952	9.30439e-14	1.53877e-11
ENSMUSG00000085493	Gm15469	38.4338	28.8951	47.9725	1.66023	0.731381	0.0242687	0.14898
ENSMUSG00000094092	Gm15921	4.15529	3.12445	5.18613	1.65986	0.731058	0.718702	0.977246
ENSMUSG00000085839	Gm15949	2.21132	1.66297	2.75967	1.65948	0.730733	0.933168	1
ENSMUSG00000046031	Fam26f	4.01261	3.01803	5.00718	1.65909	0.730391	0.796174	1
ENSMUSG00000056468	5730596B20Rik	14.9431	11.2416	18.6445	1.65852	0.729897	0.162994	0.508821
ENSMUSG00000003273	Car11	112.729	84.8137	140.645	1.65828	0.729691	0.000323916	0.00529374
ENSMUSG00000082532	Rpl31-ps6	3.58368	2.69728	4.47008	1.65725	0.728795	0.692244	0.969719
ENSMUSG00000045802	Hsf3	11.058	8.32469	13.7914	1.65668	0.728297	0.440881	0.830144
ENSMUSG00000028751	Pla2g2e	1.24209	0.935067	1.5491	1.65668	0.728293	1	1
ENSMUSG00000092229	Gm4433	13.0016	9.78883	16.2144	1.65642	0.728067	0.254771	0.647029
ENSMUSG00000056018	1700008F21Rik	8.83779	6.65454	11.021	1.65617	0.727847	0.408419	0.805722
ENSMUSG00000085083	Gm11615	7.5957	5.71948	9.47193	1.65608	0.727774	0.405847	0.804178
ENSMUSG00000039315	Clnk	0.966569	0.727904	1.20523	1.65576	0.727492	1	1
ENSMUSG00000059956	Serpinb12	0.966569	0.727904	1.20523	1.65576	0.727492	1	1
ENSMUSG00000081221	Gm14760	38.4479	28.9638	47.9319	1.65489	0.726733	0.0431832	0.222502
ENSMUSG00000082180	Gm12230	4.40965	3.32293	5.49636	1.65407	0.726019	0.475912	0.860321
ENSMUSG00000022496	Tnfrsf17	1.23867	0.933563	1.54377	1.65364	0.725641	0.70103	0.973343
ENSMUSG00000085957	Syna	14.0738	10.6076	17.5401	1.65353	0.725549	0.33899	0.743061
ENSMUSG00000073405	C920025E04Rik	5.11437	3.85501	6.37372	1.65336	0.725399	0.311076	0.713566
ENSMUSG00000090778	Gm3235	36.0056	27.1401	44.8712	1.65332	0.725365	0.0374306	0.202144
ENSMUSG00000070880	Gad1	1.51494	1.14223	1.88764	1.6526	0.724734	1	1
ENSMUSG00000019194	Scn1b	537.807	405.519	670.096	1.65244	0.724599	5.13563e-11	5.35142e-09
ENSMUSG00000009216	Fam163b	59.3604	44.7747	73.9461	1.65152	0.72379	0.00432846	0.0417646
ENSMUSG00000065579	Mir425	11.7201	8.84242	14.5978	1.65088	0.723233	0.267283	0.663116
ENSMUSG00000022187	Gm5546	4.00744	3.0237	4.99118	1.65069	0.723067	0.706073	0.974791
ENSMUSG00000027364	Usp50	27.2553	20.5791	33.9315	1.64883	0.721445	0.0525693	0.254269
ENSMUSG00000036912	Piwil4	12.9415	9.77147	16.1115	1.64883	0.721443	0.0887056	0.355287
ENSMUSG00000091089	A930018M24Rik	249.828	188.665	310.991	1.64837	0.721043	1.20891e-06	4.75011e-05
ENSMUSG00000085996	A830012C17Rik	1.24492	0.940736	1.5491	1.64669	0.719572	0.888912	1
ENSMUSG00000020374	Rasgef1c	5.2162	3.94176	6.49065	1.64664	0.719523	0.907275	1
ENSMUSG00000063704	Mapk15	49.5094	37.4194	61.5994	1.64619	0.719129	0.00956174	0.0750878
ENSMUSG00000085976	Gm13816	14.7426	11.1439	18.3414	1.64587	0.718848	0.221717	0.603769
ENSMUSG00000016624	Phf21b	208.772	157.813	259.732	1.64582	0.718809	4.05521e-06	0.000131002
ENSMUSG00000029915	Clec5a	61.0723	46.1656	75.9789	1.64579	0.71878	0.00854831	0.0689873
ENSMUSG00000060780	Lrrtm1	3.44133	2.6022	4.28046	1.64494	0.718033	0.575255	0.918611
ENSMUSG00000074575	Kcng1	16.0799	12.1597	20.0002	1.64479	0.717906	0.188916	0.553711
ENSMUSG00000069273	Hist1h3e	6.73192	5.09082	8.37302	1.64473	0.717852	0.312445	0.714616
ENSMUSG00000022548	Apod	48.6068	36.7594	60.4542	1.64459	0.717728	0.00867569	0.0697462
ENSMUSG00000081113	Gm7308	3.43392	2.59804	4.2698	1.64347	0.716745	0.868157	1
ENSMUSG00000046719	Nxph3	25.2647	19.1165	31.413	1.64324	0.716545	0.152443	0.490924
ENSMUSG00000020303	Stc2	988.089	747.873	1228.31	1.6424	0.715805	1.48276e-12	2.14768e-10
ENSMUSG00000031494	Cd209a	2.60917	1.97655	3.2418	1.64013	0.713811	0.942927	1
ENSMUSG00000093615		1.91748	1.4528	2.38215	1.6397	0.71343	0.346275	0.750776
ENSMUSG00000091272	Gm17641	11.2451	8.52167	13.9686	1.63919	0.71298	0.276655	0.673064
ENSMUSG00000000983	Expi	2.06897	1.56789	2.57005	1.63918	0.712971	0.796051	1
ENSMUSG00000035686	Thrsp	249.593	189.164	310.023	1.63891	0.712738	1.26723e-06	4.96169e-05
ENSMUSG00000039304	Tnfsf10	1535.67	1164.11	1907.23	1.63836	0.712248	2.62548e-11	2.92378e-09
ENSMUSG00000022661	Cd200	2886.85	2188.46	3585.25	1.63826	0.712163	8.65561e-15	1.6975e-12
ENSMUSG00000035513	Ntng2	124.974	94.7458	155.202	1.63809	0.71201	0.000472872	0.00728235
ENSMUSG00000034117	Gpr44	4.65426	3.52859	5.77992	1.63803	0.711958	0.338176	0.742518
ENSMUSG00000085003	4930418C01Rik	1.64613	1.24865	2.04361	1.63667	0.710759	0.915338	1
ENSMUSG00000069171	Nr2f1	477.485	362.381	592.589	1.63526	0.709524	3.5667e-08	2.08553e-06
ENSMUSG00000080712	Hist3h2bb-ps	2.74228	2.08146	3.4031	1.63496	0.709254	0.61147	0.937316
ENSMUSG00000095845	Gm5741	7.25355	5.50665	9.00046	1.63447	0.708825	0.451217	0.838877
ENSMUSG00000051804	Adam6b	0.545702	0.414325	0.677078	1.63417	0.708559	1	1
ENSMUSG00000070866	Zfp804a	0.818553	0.621488	1.01562	1.63417	0.708559	1	1
ENSMUSG00000078487	E230028L10Rik	1.0914	0.828651	1.35416	1.63417	0.708559	1	1
ENSMUSG00000081868	Gm12039	0.545702	0.414325	0.677078	1.63417	0.708559	1	1
ENSMUSG00000082329	Gm14287	0.545702	0.414325	0.677078	1.63417	0.708559	1	1
ENSMUSG00000083378	Gm13196	0.545702	0.414325	0.677078	1.63417	0.708559	1	1
ENSMUSG00000088066		0.545702	0.414325	0.677078	1.63417	0.708559	1	1
ENSMUSG00000093721	Gm3896	0.545702	0.414325	0.677078	1.63417	0.708559	1	1
ENSMUSG00000094258	Gm8159	0.545702	0.414325	0.677078	1.63417	0.708559	1	1
ENSMUSG00000094995	Gm17365	0.545702	0.414325	0.677078	1.63417	0.708559	1	1
ENSMUSG00000042888	1700110M21Rik	9.71021	7.37678	12.0436	1.63264	0.707208	0.486267	0.865347
ENSMUSG00000066196	Spag8	20.1277	15.2925	24.963	1.63237	0.706969	0.0960713	0.373425
ENSMUSG00000085112	A530072M11Rik	23.2565	17.6807	28.8323	1.63072	0.705511	0.173233	0.527264
ENSMUSG00000026928	Card9	111.569	84.8261	138.312	1.63054	0.705348	0.00350075	0.0354571
ENSMUSG00000039661	Dusp26	24.1904	18.3999	29.9809	1.6294	0.704344	0.12566	0.43827
ENSMUSG00000038676	Ucn	5.2018	3.95726	6.44634	1.62899	0.703977	0.528449	0.893186
ENSMUSG00000022542	2012-09-01	2.19125	1.66714	2.71536	1.62876	0.703772	0.547596	0.902222
ENSMUSG00000079547	H2-DMb1	33.6054	25.5692	41.6417	1.62859	0.703622	0.0335167	0.186677
ENSMUSG00000038580	Sct	3.83205	2.91578	4.74831	1.62849	0.703532	0.523704	0.890016
ENSMUSG00000048706	D4Bwg0951e	356.463	271.262	441.664	1.62819	0.703265	6.96229e-10	5.95719e-08
ENSMUSG00000065999	Gm13154	56.0051	42.6208	69.3893	1.62806	0.703154	0.0043368	0.0418042
ENSMUSG00000077274		2.46485	1.8758	3.0539	1.62805	0.703145	0.828912	1
ENSMUSG00000054863	Fam19a5	90.8381	69.1371	112.539	1.62777	0.702894	0.00253178	0.0276388
ENSMUSG00000051367	Six1	19.257	14.657	23.857	1.62769	0.702826	0.220695	0.602393
ENSMUSG00000079502	1700101E01Rik	6.42365	4.89083	7.95647	1.62681	0.702049	0.397287	0.797421
ENSMUSG00000091954	Gm17179	22.6884	17.2747	28.1022	1.62678	0.702023	0.091321	0.361516
ENSMUSG00000076122	Mir503	5.04022	3.83801	6.24244	1.62648	0.701754	0.529787	0.893799
ENSMUSG00000046196	Ttc39d	3.42201	2.60787	4.23615	1.62437	0.699881	0.474259	0.859356
ENSMUSG00000036117	Il5	6.54506	4.99007	8.10006	1.62324	0.698872	0.335095	0.739424
ENSMUSG00000092257	Gm2308	5.1774	3.94743	6.40736	1.62317	0.698817	0.833777	1
ENSMUSG00000024682	Gif	1.76755	1.34789	2.18721	1.62269	0.698388	0.773463	0.996417
ENSMUSG00000071226	Cecr2	1322.99	1008.94	1637.03	1.62252	0.698239	1.42592e-11	1.73626e-09
ENSMUSG00000028963	Uts2	9.55007	7.29038	11.8098	1.61991	0.695915	0.536895	0.897707
ENSMUSG00000063919	Srrm4	357.419	272.885	441.953	1.61956	0.6956	9.42926e-08	4.91675e-06
ENSMUSG00000047246	Hist1h2be	112.004	85.5425	138.466	1.61869	0.694824	0.000961482	0.0130082
ENSMUSG00000072952	Gm5878	3.26033	2.49012	4.03054	1.61861	0.69476	0.76147	0.992304
ENSMUSG00000086993	Gm15623	2.86623	2.18938	3.54308	1.6183	0.69448	0.746869	0.989259
ENSMUSG00000025091	Pnliprp2	1.22185	0.933563	1.51013	1.6176	0.693852	0.702028	0.97418
ENSMUSG00000088490		3.53526	2.70145	4.36908	1.61731	0.693598	0.471573	0.856902
ENSMUSG00000034450	Gulo	2.98748	2.28295	3.692	1.6172	0.693501	0.746641	0.989259
ENSMUSG00000074006	Omp	2.98748	2.28295	3.692	1.6172	0.693501	0.746641	0.989259
ENSMUSG00000088549		0.952412	0.727904	1.17692	1.61686	0.693197	1	1
ENSMUSG00000037217	Syn1	51.5512	39.3993	63.703	1.61685	0.69319	0.0431994	0.222526
ENSMUSG00000085735	4930550G17Rik	8.83852	6.75529	10.9217	1.61677	0.693114	0.459386	0.845834
ENSMUSG00000091405	Hist2h4	8.2897	6.33645	10.243	1.61651	0.692884	0.191297	0.557595
ENSMUSG00000027077	Smtnl1	4.07563	3.11577	5.03549	1.61613	0.692544	0.519869	0.887195
ENSMUSG00000086069	Gm13708	1.49203	1.14073	1.84333	1.61593	0.692367	0.743778	0.988887
ENSMUSG00000045775	Slc16a5	27.3154	20.887	33.7439	1.61554	0.692018	0.0791991	0.331532
ENSMUSG00000050966	Lin28a	1.2226	0.935067	1.51013	1.61499	0.691529	1	1
ENSMUSG00000061816	Myl1	711.993	544.559	879.427	1.61493	0.691476	3.1427e-12	4.29909e-10
ENSMUSG00000025150	Cbr2	285.297	218.259	352.335	1.61429	0.690904	4.5544e-07	2.01056e-05
ENSMUSG00000096847	Tmem151b	6.91776	5.29231	8.54321	1.61427	0.690881	0.472561	0.857411
ENSMUSG00000080665	Mir1199	4.20399	3.21652	5.19146	1.614	0.690642	0.541976	0.899198
ENSMUSG00000045733	Sprn	39.1002	29.9192	48.2812	1.61372	0.690389	0.0223048	0.140155
ENSMUSG00000066407	Gm10263	41.6774	31.9116	51.4431	1.61205	0.688895	0.0344901	0.190893
ENSMUSG00000026011	Ctla4	24.4422	18.7176	30.1668	1.61168	0.688563	0.0920098	0.362977
ENSMUSG00000087704	Gm14978	1.48936	1.14073	1.838	1.61126	0.688187	0.743865	0.988887
ENSMUSG00000065438	Mir377	2.71746	2.08146	3.35346	1.61111	0.688054	0.611995	0.937577
ENSMUSG00000089639	Gm2862	2.71746	2.08146	3.35346	1.61111	0.688054	0.611995	0.937577
ENSMUSG00000074210	E130208F15Rik	15.8785	12.1627	19.5943	1.61101	0.687969	0.342152	0.746156
ENSMUSG00000056617	4931429L15Rik	1.76847	1.35506	2.18187	1.61017	0.687209	0.917241	1
ENSMUSG00000090227	Gm16554	2.44803	1.8758	3.02026	1.61011	0.687162	0.828817	1
ENSMUSG00000082457	Gm13776	2.9884	2.29013	3.68667	1.60981	0.68689	0.851791	1
ENSMUSG00000000805	Car4	2234.18	1712.17	2756.18	1.60976	0.686844	7.08915e-13	1.07605e-10
ENSMUSG00000086022	Rad51ap2	0.949746	0.727904	1.17159	1.60954	0.686646	1	1
ENSMUSG00000026073	Il1r2	5.15391	3.95009	6.35772	1.60951	0.686624	0.453231	0.840647
ENSMUSG00000074065	Gm10617	1.21993	0.935067	1.5048	1.60929	0.686426	1	1
ENSMUSG00000078604	Gm10961	1.21993	0.935067	1.5048	1.60929	0.686426	1	1
ENSMUSG00000092937		1.21993	0.935067	1.5048	1.60929	0.686426	1	1
ENSMUSG00000017754	Pltp	1357.59	1040.63	1674.56	1.60919	0.68633	2.5469e-13	4.11984e-11
ENSMUSG00000021534	1700001L19Rik	1.49012	1.14223	1.838	1.60914	0.686286	1	1
ENSMUSG00000023484	Prph	23.6038	18.0935	29.1142	1.6091	0.686251	0.160017	0.503213
ENSMUSG00000085382	Gm13861	15.324	11.7469	18.9012	1.60904	0.686202	0.269105	0.665127
ENSMUSG00000031750	Il34	148.978	114.208	183.748	1.60889	0.686064	0.000213786	0.00378715
ENSMUSG00000086534	Gm16758	15.8746	12.1725	19.5766	1.60826	0.685503	0.225739	0.609924
ENSMUSG00000079262	Slco1a6	24.5447	18.8267	30.2627	1.60743	0.684757	0.057914	0.271109
ENSMUSG00000038332	Sesn1	4390.59	3370.25	5410.93	1.6055	0.68302	4.64303e-15	9.35401e-13
ENSMUSG00000082313	Gm11701	1.22543	0.940736	1.51013	1.60526	0.682808	0.888983	1
ENSMUSG00000093886		5.41267	4.15575	6.6696	1.60491	0.682491	0.330049	0.73348
ENSMUSG00000045532	C1ql1	13.9441	10.708	17.1802	1.60442	0.682051	0.137805	0.462361
ENSMUSG00000017692	Rhbdl3	316.583	243.114	390.053	1.6044	0.682033	2.55897e-07	1.19137e-05
ENSMUSG00000084929	4732418A04Rik	374.109	287.328	460.89	1.60405	0.68172	7.62586e-09	5.2321e-07
ENSMUSG00000077391		5.8227	4.47234	7.17306	1.60387	0.68156	0.629901	0.94475
ENSMUSG00000050538	B230217C12Rik	12.9794	9.97331	15.9856	1.60283	0.680624	0.408263	0.805722
ENSMUSG00000092131	BC050972	12.0466	9.2579	14.8353	1.60245	0.680276	0.122296	0.431562
ENSMUSG00000031898	Dpep3	0.94708	0.727904	1.16626	1.60221	0.680065	1	1
ENSMUSG00000083192	Rpl31-ps12	0.94708	0.727904	1.16626	1.60221	0.680065	1	1
ENSMUSG00000054588	Gbp10	5.93872	4.56441	7.31303	1.60219	0.680043	0.431502	0.823837
ENSMUSG00000096519		25.3701	19.5041	31.2361	1.60152	0.679438	0.00328425	0.0337893
ENSMUSG00000075324	Fign	659.264	506.947	811.582	1.60092	0.678901	1.37718e-09	1.11793e-07
ENSMUSG00000053181	A830005F24Rik	3.39261	2.60938	4.17585	1.60032	0.678364	0.676316	0.965183
ENSMUSG00000081052	Gm6305	8.37659	6.44287	10.3103	1.60027	0.678312	0.167769	0.517807
ENSMUSG00000082193	Rpl5-ps1	7.3124	5.6244	9.0004	1.60024	0.678289	0.37875	0.780847
ENSMUSG00000046834	Krt1	3.36736	2.59086	4.14385	1.59941	0.67754	0.773803	0.99676
ENSMUSG00000047976	Kcna1	50.3332	38.7393	61.927	1.59856	0.676769	0.0497709	0.245342
ENSMUSG00000079018	Ly6c1	4728.92	3640.15	5817.7	1.5982	0.67645	3.14203e-14	5.57045e-12
ENSMUSG00000020698	Cct6b	9.17166	7.0617	11.2816	1.59758	0.675887	0.418046	0.813449
ENSMUSG00000029384	2010109A12Rik	4.05782	3.12445	4.99118	1.59746	0.675781	0.796545	1
ENSMUSG00000031654	Cbln1	19.1548	14.7574	23.5522	1.59596	0.674425	0.0822508	0.339202
ENSMUSG00000083820	Gm6415	2.01824	1.55505	2.48144	1.59573	0.674214	0.796379	1
ENSMUSG00000053399	Adamts18	7.41474	5.71381	9.11568	1.59538	0.673897	0.559825	0.909565
ENSMUSG00000025497	Cdhr5	2.83163	2.18221	3.48106	1.5952	0.673737	0.728829	0.982364
ENSMUSG00000073421	H2-Ab1	131.272	101.19	161.354	1.59457	0.673166	0.000447785	0.00697846
ENSMUSG00000052154	Gm9870	1.2201	0.940736	1.49946	1.59393	0.672584	0.889002	1
ENSMUSG00000081679	Gm11874	2.57037	1.98222	3.15851	1.59342	0.67213	0.829472	1
ENSMUSG00000019767	Gm221	14.2826	11.0144	17.5507	1.59342	0.672128	0.136376	0.459863
ENSMUSG00000072962	Gm16401	2.95999	2.28295	3.63703	1.59312	0.671858	0.746694	0.989259
ENSMUSG00000077563	Snora68	8.88804	6.85604	10.92	1.59276	0.67153	0.557668	0.908532
ENSMUSG00000042254	Cilp	741.973	572.353	911.593	1.59271	0.671484	1.10779e-10	1.09597e-08
ENSMUSG00000021638	Ocln	42.039	32.4327	51.6454	1.59238	0.671188	0.095234	0.371302
ENSMUSG00000084148	Gm12380	2.01558	1.55505	2.4761	1.5923	0.67111	0.796396	1
ENSMUSG00000029371	Cxcl5	6.59886	5.09232	8.10539	1.59169	0.670559	0.525596	0.891546
ENSMUSG00000005148	Klf5	32.3619	24.9749	39.7489	1.59155	0.670437	0.0639561	0.290255
ENSMUSG00000039198	Ptchd3	70.3066	54.2703	86.3428	1.59098	0.669913	0.014782	0.103469
ENSMUSG00000016200	Syt14	0.940996	0.7264	1.15559	1.59085	0.669796	0.637683	0.948622
ENSMUSG00000088200		2.5677	1.98222	3.15318	1.59073	0.669692	0.829458	1
ENSMUSG00000036362	P2ry13	63.4773	49.0045	77.9501	1.59067	0.669637	0.00446399	0.042549
ENSMUSG00000022347	A1bg	7.26625	5.61005	8.92244	1.59044	0.669424	0.271399	0.667756
ENSMUSG00000040829	Zmynd15	369.444	285.269	453.618	1.59014	0.669155	3.50111e-08	2.06352e-06
ENSMUSG00000038354	Ankrd35	89.421	69.0481	109.794	1.59011	0.669126	0.0094816	0.0745113
ENSMUSG00000092544	Gm20422	6.46411	4.99308	7.93514	1.58923	0.668326	0.593126	0.925848
ENSMUSG00000021640	Naip1	2.96283	2.28862	3.63703	1.58918	0.668279	0.636689	0.94837
ENSMUSG00000089991	Gm16332	75.4695	58.3023	92.6366	1.5889	0.66803	0.0052055	0.0474143
ENSMUSG00000056735	A930024E05Rik	84.7296	65.4697	103.989	1.58836	0.667537	0.00613887	0.0537133
ENSMUSG00000015476	Prrt1	124.463	96.1928	152.733	1.58778	0.66701	0.000187765	0.00340792
ENSMUSG00000021206	D830046C22Rik	13.5831	10.4982	16.668	1.58769	0.666933	0.311059	0.713566
ENSMUSG00000086549	Gm13648	0.941748	0.727904	1.15559	1.58756	0.666812	1	1
ENSMUSG00000096464		0.941748	0.727904	1.15559	1.58756	0.666812	1	1
ENSMUSG00000090329	Gm17160	6.05391	4.6795	7.42831	1.58742	0.66668	0.640963	0.95003
ENSMUSG00000090272	Mndal	1283.44	992.084	1574.8	1.58736	0.666632	3.59594e-10	3.23942e-08
ENSMUSG00000085063	Gm16024	5.64719	4.36592	6.92847	1.58694	0.666251	0.69373	0.970569
ENSMUSG00000095193		25.288	19.5565	31.0195	1.58615	0.665528	0.197838	0.567618
ENSMUSG00000084947	Gm15594	1.74273	1.34789	2.13756	1.58586	0.665268	0.773878	0.996798
ENSMUSG00000058932	Gm2174	5.65014	4.37009	6.93018	1.58582	0.665232	0.415837	0.811739
ENSMUSG00000091695	Gm17669	5.37862	4.16026	6.59698	1.58571	0.665131	0.766646	0.993804
ENSMUSG00000052273	Dnahc3	15.18	11.7424	18.6176	1.58551	0.664948	0.138822	0.464575
ENSMUSG00000085135	Gm13713	33.7413	26.1016	41.3811	1.58538	0.664833	0.095558	0.372107
ENSMUSG00000009670	Tex11	39.7782	30.7759	48.7805	1.58502	0.664503	0.0547229	0.26108
ENSMUSG00000040229	Gpr34	108.107	83.6458	132.568	1.58487	0.664366	0.00108027	0.0143111
ENSMUSG00000022041	Chrna2	97.9483	75.7887	120.108	1.58477	0.664278	0.00336431	0.0344372
ENSMUSG00000000320	Alox12	516.917	400.05	633.784	1.58426	0.663812	1.89015e-08	1.19679e-06
ENSMUSG00000062511	4930512M02Rik	1.74348	1.34939	2.13756	1.58409	0.663659	1	1
ENSMUSG00000051228	Nyx	47.4086	36.7059	58.1113	1.58316	0.662808	0.0225402	0.141425
ENSMUSG00000024532	1700034E13Rik	3.48487	2.69994	4.2698	1.58144	0.661239	0.278325	0.675718
ENSMUSG00000078234	Klhdc7a	374.601	290.396	458.807	1.57994	0.659869	1.46363e-05	0.000401927
ENSMUSG00000030157	Clec2d	882.402	684.833	1079.97	1.57698	0.657168	9.096e-10	7.57806e-08
ENSMUSG00000084265	Gm14541	4.95433	3.84518	6.06349	1.57691	0.657098	0.67139	0.962659
ENSMUSG00000036923	Stox1	99.0238	76.88	121.168	1.57606	0.656323	0.00309277	0.0323601
ENSMUSG00000085776	5430402O13Rik	12.0507	9.36016	14.7413	1.5749	0.655264	0.201015	0.573172
ENSMUSG00000032420	Nt5e	1192.07	926.01	1458.14	1.57465	0.655029	1.28726e-10	1.24572e-08
ENSMUSG00000073388	A330017A19Rik	7.89425	6.1323	9.65621	1.57465	0.655029	0.363762	0.768259
ENSMUSG00000037709	Fam13a	1150.54	893.948	1407.12	1.57405	0.654485	2.07815e-10	1.95143e-08
ENSMUSG00000086034	Gm15201	4.54147	3.5316	5.55133	1.5719	0.652512	0.730621	0.983158
ENSMUSG00000044556	4930544O15Rik	15.3781	11.9612	18.7949	1.57132	0.651981	0.330341	0.73383
ENSMUSG00000038201	Kcna7	147.914	115.099	180.728	1.57019	0.650941	0.000244803	0.00424498
ENSMUSG00000069971	4933402J07Rik	1.07208	0.83432	1.30985	1.56996	0.650726	1	1
ENSMUSG00000081301	Gm15951	1.07208	0.83432	1.30985	1.56996	0.650726	1	1
ENSMUSG00000087386	Gm15637	1.07208	0.83432	1.30985	1.56996	0.650726	1	1
ENSMUSG00000079383	Gm3298	2.53588	1.97354	3.09821	1.56987	0.650648	0.448987	0.836908
ENSMUSG00000074603	Gm10729	2.26361	1.76221	2.765	1.56905	0.649892	0.81445	1
ENSMUSG00000028396	2310002L09Rik	251.486	195.783	307.189	1.56903	0.649875	1.22461e-05	0.000345275
ENSMUSG00000078519	2310026L22Rik	33.6657	26.2092	41.1221	1.569	0.649844	0.0500154	0.246151
ENSMUSG00000025479	Cyp2e1	3.61763	2.81654	4.41872	1.56885	0.649705	0.774894	0.99748
ENSMUSG00000087347	1700047K16Rik	30.1705	23.4919	36.849	1.56859	0.649465	0.0463254	0.233694
ENSMUSG00000022847	Thpo	14.0127	10.9125	17.1128	1.56818	0.649091	0.325061	0.728361
ENSMUSG00000020108	Ddit4	1975.19	1538.6	2411.78	1.56751	0.648479	1.11385e-12	1.64561e-10
ENSMUSG00000046637	Ttc34	5.47538	4.26517	6.6856	1.56749	0.648452	0.618142	0.939583
ENSMUSG00000091617	Gm3752	51.1139	39.822	62.4058	1.56712	0.648114	0.0425931	0.220642
ENSMUSG00000036111	Lmo1	62.2937	48.5392	76.0482	1.56674	0.647765	0.0134642	0.0967824
ENSMUSG00000042659	Arrdc4	1961.23	1528.33	2394.13	1.5665	0.647547	4.08373e-11	4.39318e-09
ENSMUSG00000046826	Fam187b	5.21261	4.06218	6.36305	1.56641	0.647466	0.379055	0.780909
ENSMUSG00000084987	Gm13134	3.74332	2.91729	4.56936	1.56631	0.647365	0.785807	1
ENSMUSG00000021265	Slc25a29	114.84	89.5015	140.179	1.56622	0.647283	0.000639718	0.00932071
ENSMUSG00000093619	4930535L15Rik	8.67058	6.75795	10.5832	1.56604	0.647119	0.256841	0.649297
ENSMUSG00000087016	Gm15979	2.26986	1.76939	2.77033	1.5657	0.646811	0.934443	1
ENSMUSG00000007034	Slc44a4	1.4653	1.14223	1.78836	1.56568	0.646786	1	1
ENSMUSG00000024232	Bambi	1000.48	779.916	1221.05	1.56562	0.646736	1.55661e-09	1.24985e-07
ENSMUSG00000079235	Ccdc13	4.53555	3.53577	5.53534	1.56553	0.646648	0.473999	0.859199
ENSMUSG00000093985	Gm10406	69.6023	54.273	84.9317	1.5649	0.646069	0.011633	0.0871828
ENSMUSG00000045662	4921515J06Rik	1.19702	0.933563	1.46049	1.56442	0.64563	0.703531	0.974791
ENSMUSG00000086475	Gm12139	2.66146	2.07579	3.24713	1.56429	0.645504	0.829915	1
ENSMUSG00000068324	Gm10029	2.26644	1.76788	2.765	1.56402	0.645258	0.683833	0.968246
ENSMUSG00000030048	Gkn3	36.3738	28.3729	44.3747	1.56398	0.645224	0.0486924	0.24189
ENSMUSG00000063767	S100a7a	10.6559	8.31451	12.9973	1.56321	0.644509	0.327671	0.731493
ENSMUSG00000068794	Col28a1	185.582	144.813	226.351	1.56305	0.644368	0.000122782	0.00242943
ENSMUSG00000064952		0.796398	0.621488	0.971309	1.56288	0.644203	1	1
ENSMUSG00000080962	Gm11453	0.796398	0.621488	0.971309	1.56288	0.644203	1	1
ENSMUSG00000088913		0.796398	0.621488	0.971309	1.56288	0.644203	1	1
ENSMUSG00000094620	Gm5167	0.796398	0.621488	0.971309	1.56288	0.644203	1	1
ENSMUSG00000035849	Krt222	1945.55	1518.26	2372.84	1.56286	0.644192	5.21188e-12	6.75441e-10
ENSMUSG00000057897	Camk2b	798.482	623.163	973.801	1.56267	0.644017	3.98221e-09	2.85598e-07
ENSMUSG00000086676	Gm14705	5.06252	3.95159	6.17344	1.56226	0.643639	0.671445	0.962659
ENSMUSG00000023236	Scg5	2.79532	2.18221	3.40844	1.56192	0.643321	0.729065	0.982364
ENSMUSG00000037625	Cldn11	40.4283	31.5686	49.288	1.5613	0.642747	0.138737	0.464433
ENSMUSG00000093482	Gm20619	47.9423	37.4368	58.4479	1.56124	0.642694	0.0389461	0.207322
ENSMUSG00000054418	2900041M22Rik	9.19002	7.17644	11.2036	1.56116	0.642621	0.187252	0.551089
ENSMUSG00000089621		1.46263	1.14223	1.78303	1.56101	0.642478	1	1
ENSMUSG00000006542	Prkag3	331.187	258.802	403.573	1.55939	0.640984	1.05802e-06	4.24761e-05
ENSMUSG00000081926	Gm15536	7.71075	6.02588	9.39562	1.55921	0.640816	0.405071	0.803899
ENSMUSG00000046532	Ar	173.782	135.824	211.741	1.55894	0.640562	0.000297007	0.00492663
ENSMUSG00000060509	Xcr1	15.0232	11.7424	18.304	1.5588	0.64044	0.169765	0.520932
ENSMUSG00000013562	4833413E03Rik	1.59013	1.24298	1.93728	1.55859	0.640238	1	1
ENSMUSG00000020123	Avpr1a	78.0383	61.0226	95.0541	1.55769	0.639405	0.0115555	0.0866898
ENSMUSG00000005951	Shpk	162.633	127.202	198.063	1.55708	0.638841	0.000290678	0.00484704
ENSMUSG00000020839	Tmigd1	26.1948	20.4927	31.8968	1.5565	0.638303	0.116944	0.420162
ENSMUSG00000024395	Lims2	4436.79	3471	5402.57	1.55649	0.638294	3.60522e-14	6.34089e-12
ENSMUSG00000021032	Ngb	12.1028	9.46958	14.736	1.55614	0.637974	0.339096	0.74313
ENSMUSG00000067261	Foxd3	16.461	12.8846	20.0374	1.55514	0.637047	0.198779	0.569356
ENSMUSG00000000791	Il12rb1	2.51772	1.97088	3.06456	1.55492	0.636842	1	1
ENSMUSG00000091390	Gm17168	45.4224	35.5568	55.288	1.55492	0.636839	0.0627505	0.286607
ENSMUSG00000036381	P2ry14	289.935	227.001	352.869	1.55448	0.636432	2.50935e-05	0.000637725
ENSMUSG00000046167	Gldn	0.793732	0.621488	0.965976	1.5543	0.636262	1	1
ENSMUSG00000083241	Gm13259	0.793732	0.621488	0.965976	1.5543	0.636262	1	1
ENSMUSG00000089169		0.793732	0.621488	0.965976	1.5543	0.636262	1	1
ENSMUSG00000093187	Mir344-2	0.793732	0.621488	0.965976	1.5543	0.636262	1	1
ENSMUSG00000074619	1700034I23Rik	4.65331	3.64369	5.66293	1.55418	0.636151	0.644975	0.951769
ENSMUSG00000056752	Dnahc9	3.18528	2.49428	3.87628	1.55407	0.636049	0.444752	0.83336
ENSMUSG00000029321	Slc10a6	27.7217	21.7085	33.7348	1.55399	0.63598	0.1095	0.403764
ENSMUSG00000082570	Gm15711	1.59221	1.24714	1.93728	1.55338	0.635411	0.740608	0.987424
ENSMUSG00000086749	Gm12037	3.31278	2.59503	4.03054	1.55318	0.635222	0.549046	0.903024
ENSMUSG00000072568	Fam84b	849.966	666.128	1033.8	1.55196	0.634092	1.79529e-08	1.14655e-06
ENSMUSG00000020423	Btg2	4315.42	3382.5	5248.35	1.55162	0.633776	8.24812e-14	1.38475e-11
ENSMUSG00000071540	3425401B19Rik	6621.27	5190.24	8052.29	1.55143	0.633598	2.3888e-12	3.37186e-10
ENSMUSG00000026609	Ush2a	11.0139	8.63526	13.3925	1.55091	0.633116	0.346241	0.750776
ENSMUSG00000089223		2.78124	2.1807	3.38177	1.55077	0.632987	0.488725	0.866748
ENSMUSG00000053957	Gm12474	1.72607	1.35356	2.09859	1.55042	0.632663	0.614253	0.938549
ENSMUSG00000046807	AI646023	77.2797	60.6034	93.9559	1.55034	0.632585	0.00452654	0.0429973
ENSMUSG00000045968	5830403L16Rik	4.1101	3.22369	4.99652	1.54994	0.632209	0.706036	0.974791
ENSMUSG00000078591	Hs3st4	7.81969	6.1338	9.50557	1.5497	0.631992	0.519772	0.887195
ENSMUSG00000067882	Gm5146	0.799233	0.627157	0.971309	1.54875	0.631102	1	1
ENSMUSG00000029830	Svopl	47.5353	37.305	57.7655	1.54846	0.630838	0.0894692	0.356877
ENSMUSG00000034482	Ly6g5c	8.74433	6.86286	10.6258	1.5483	0.630689	0.201361	0.573422
ENSMUSG00000082776	Gm7061	4.76543	3.74027	5.79059	1.54818	0.630569	0.899373	1
ENSMUSG00000088835		9.02047	7.08021	10.9607	1.54808	0.63048	0.407595	0.805559
ENSMUSG00000010021	Kif19a	11.6617	9.1545	14.1689	1.54775	0.630173	0.284437	0.683719
ENSMUSG00000083964	Gm14122	37.7478	29.6442	45.8514	1.54672	0.629216	0.042155	0.218833
ENSMUSG00000044952	Kctd21	245.707	192.962	298.452	1.54669	0.629187	3.31623e-05	0.000794497
ENSMUSG00000073492	Gm10521	15.4898	12.1654	18.8143	1.54655	0.629051	0.22031	0.602008
ENSMUSG00000047508	Mbd3l2	5.82001	4.57158	7.06844	1.54617	0.6287	0.556607	0.907918
ENSMUSG00000074206	Adh6b	5.56408	4.37159	6.75657	1.54556	0.628132	0.617988	0.939583
ENSMUSG00000031775	Pllp	31.9915	25.1507	38.8324	1.54399	0.626662	0.0796312	0.332978
ENSMUSG00000050747	Trim15	14.5539	11.442	17.6659	1.54396	0.626636	0.480029	0.862372
ENSMUSG00000069804	Gm10277	13.3616	10.5054	16.2178	1.54376	0.626451	0.376377	0.778359
ENSMUSG00000042436	Mfap4	6449.11	5070.65	7827.57	1.5437	0.626394	6.98817e-14	1.18217e-11
ENSMUSG00000087475	4933406I18Rik	2.25037	1.76939	2.73136	1.54367	0.626369	0.934024	1
ENSMUSG00000091997	Gm6611	8.58709	6.75228	10.4219	1.54346	0.626172	0.335494	0.739844
ENSMUSG00000042115	Klhdc8a	2619.07	2059.72	3178.41	1.54313	0.625855	6.28961e-13	9.6127e-11
ENSMUSG00000073129	Gm10472	1.72074	1.35356	2.08792	1.54255	0.625313	0.614506	0.938757
ENSMUSG00000086269	Gm16154	14.808	11.6575	17.9584	1.54051	0.62341	0.297009	0.697322
ENSMUSG00000054453	Sytl5	0.796567	0.627157	0.965976	1.54025	0.62316	1	1
ENSMUSG00000081003	Gm14301	0.796567	0.627157	0.965976	1.54025	0.62316	1	1
ENSMUSG00000037762	Slc16a9	193.679	152.508	234.85	1.53993	0.62286	0.000111916	0.00224865
ENSMUSG00000037129	Tmprss13	23.516	18.5188	28.5131	1.53968	0.622633	0.0596441	0.276579
ENSMUSG00000040181	Fmo1	2503.91	1971.96	3035.85	1.53951	0.622473	8.24562e-12	1.02658e-09
ENSMUSG00000034145	Tmem63c	13.3246	10.4971	16.1522	1.53873	0.621744	0.624899	0.943093
ENSMUSG00000066724	Gm10175	127.409	100.374	154.444	1.53869	0.621701	0.00394408	0.0390025
ENSMUSG00000085025	Gm13715	14.663	11.5537	17.7723	1.53823	0.621272	0.141727	0.470392
ENSMUSG00000001741	Il16	545.554	429.919	661.189	1.53794	0.620998	8.933e-08	4.6911e-06
ENSMUSG00000087589	D430040D24Rik	8.30542	6.54512	10.0657	1.5379	0.620959	0.323835	0.727104
ENSMUSG00000095665		35.7553	28.1797	43.3309	1.53766	0.620741	0.0319099	0.179892
ENSMUSG00000087439	Gm15788	36.9006	29.0876	44.7135	1.5372	0.620308	0.0239482	0.147832
ENSMUSG00000022658	Tagln3	28.5049	22.4719	34.5379	1.53693	0.620056	0.082948	0.340977
ENSMUSG00000044737	Klk14	86.7205	68.367	105.074	1.53691	0.620035	0.000719265	0.0102638
ENSMUSG00000085748	Gm12280	10.558	8.32434	12.7917	1.53666	0.619798	0.202568	0.57597
ENSMUSG00000074250	Gm10653	13.9793	11.0246	16.9339	1.536	0.619183	0.317706	0.720298
ENSMUSG00000044139	Prss53	42.6976	33.6735	51.7217	1.53598	0.619156	0.0226699	0.141917
ENSMUSG00000025727	A930017K11Rik	2.64023	2.08297	3.19749	1.53507	0.618302	0.943604	1
ENSMUSG00000080525		2.24237	1.76939	2.71536	1.53463	0.617894	0.93385	1
ENSMUSG00000073679	Gm10562	7.50161	5.91947	9.08375	1.53455	0.61782	0.449833	0.837908
ENSMUSG00000037225	Fgf2	30.8182	24.3322	37.3043	1.53312	0.616473	0.119671	0.425822
ENSMUSG00000096255	Dynlt1b	446.812	352.861	540.763	1.53251	0.615896	1.40678e-07	7.07763e-06
ENSMUSG00000027071	P2rx3	21.4652	16.9554	25.975	1.53196	0.615378	0.143286	0.473158
ENSMUSG00000085578	Gm11527	2.36721	1.87013	2.86428	1.53159	0.615034	1	1
ENSMUSG00000049107	Ntf3	161.798	127.858	195.738	1.5309	0.614376	0.00115806	0.0151498
ENSMUSG00000067203	H2-K2	102.544	81.0356	124.053	1.53085	0.614333	0.0090835	0.0722539
ENSMUSG00000044021	Muc19	9.34902	7.38812	11.3099	1.53083	0.614311	0.468201	0.853653
ENSMUSG00000092860		1.84024	1.4543	2.22618	1.53075	0.614243	0.772273	0.996417
ENSMUSG00000079455	Gm16026	2.36379	1.86863	2.85895	1.52997	0.613506	0.814479	1
ENSMUSG00000048481	Mypop	97.0305	76.7132	117.348	1.52969	0.613244	0.00193501	0.0224159
ENSMUSG00000078091	Gm10912	1.841	1.45581	2.22618	1.52917	0.612752	1	1
ENSMUSG00000040841	Six5	1306.93	1033.54	1580.33	1.52905	0.612635	9.77086e-11	9.79782e-09
ENSMUSG00000085908	Gm14209	1.44239	1.14073	1.74405	1.5289	0.612492	0.745431	0.989205
ENSMUSG00000030228	Pik3c2g	3.80693	3.01086	4.603	1.5288	0.612401	0.786218	1
ENSMUSG00000064272	Gpbar1	2.23704	1.76939	2.7047	1.52861	0.612217	0.933734	1
ENSMUSG00000027316	Gfra4	136.226	107.758	164.693	1.52836	0.611988	0.00100041	0.0134283
ENSMUSG00000086825	Gm15675	323.246	255.764	390.728	1.52769	0.611349	5.73469e-05	0.00127597
ENSMUSG00000021751	Acox2	4.07937	3.22786	4.93088	1.5276	0.611269	0.427538	0.821314
ENSMUSG00000022056	Adam7	0.523547	0.414325	0.632769	1.52723	0.610916	1	1
ENSMUSG00000055010	A830031A19Rik	0.523547	0.414325	0.632769	1.52723	0.610916	1	1
ENSMUSG00000058101	1700084J12Rik	0.523547	0.414325	0.632769	1.52723	0.610916	1	1
ENSMUSG00000065078		0.523547	0.414325	0.632769	1.52723	0.610916	1	1
ENSMUSG00000080851	Gm12094	0.523547	0.414325	0.632769	1.52723	0.610916	1	1
ENSMUSG00000086258	Gm15239	0.523547	0.414325	0.632769	1.52723	0.610916	1	1
ENSMUSG00000096499		0.523547	0.414325	0.632769	1.52723	0.610916	1	1
ENSMUSG00000086992	Gm15941	3.28547	2.6007	3.97024	1.5266	0.610325	0.44188	0.830909
ENSMUSG00000073538	E330020D12Rik	45.0365	35.6504	54.4227	1.52657	0.610289	0.0672312	0.300083
ENSMUSG00000020793	Galr2	14.8481	11.7537	17.9425	1.52654	0.610263	0.156184	0.497013
ENSMUSG00000084918	Gm12708	2.49498	1.97505	3.01492	1.52651	0.610235	0.70899	0.975893
ENSMUSG00000086192	Gm13609	2.49574	1.97655	3.01492	1.52535	0.609137	0.940359	1
ENSMUSG00000093404		2.35846	1.86863	2.84829	1.52427	0.608115	0.814478	1
ENSMUSG00000084088	Gm12941	9.71306	7.69603	11.7301	1.52418	0.60803	0.529088	0.89341
ENSMUSG00000003410	Elavl3	9.0531	7.17378	10.9324	1.52394	0.607806	0.407449	0.805559
ENSMUSG00000043668	Tox3	964.776	764.578	1164.97	1.52368	0.607564	4.22939e-08	2.4219e-06
ENSMUSG00000037708	BC061194	19.0236	15.0781	22.9691	1.52334	0.607234	0.131463	0.450913
ENSMUSG00000094686	Ccl21a	223.105	176.842	269.369	1.52321	0.607119	0.000167378	0.0031249
ENSMUSG00000083993	Gm14398	3.40289	2.69728	4.10849	1.5232	0.607105	0.863081	1
ENSMUSG00000071311	Gpr31c	4.45709	3.5331	5.38108	1.52305	0.60696	0.893347	1
ENSMUSG00000028965	Tnfrsf9	12.0715	9.57183	14.5712	1.5223	0.606249	0.427742	0.821492
ENSMUSG00000042675	Ypel3	2026.92	1607.49	2446.34	1.52184	0.605818	2.5129e-10	2.33006e-08
ENSMUSG00000021950	Anxa8	23.4543	18.6029	28.3058	1.52158	0.605568	0.286457	0.685991
ENSMUSG00000081849	Gm15847	6.55042	5.19573	7.90511	1.52146	0.60546	0.315514	0.717698
ENSMUSG00000090955	Gm17097	10.6257	8.4296	12.8218	1.52104	0.605059	0.424809	0.818657
ENSMUSG00000079499	6530402F18Rik	139.786	110.911	168.661	1.52069	0.604723	9.82209e-05	0.00201544
ENSMUSG00000020331	Hcn2	2123.21	1684.75	2561.66	1.5205	0.604542	1.84641e-11	2.18814e-09
ENSMUSG00000032066	Bco2	8.66081	6.87305	10.4486	1.52022	0.604284	0.438072	0.828267
ENSMUSG00000039997	Ifi203	3039.12	2412.25	3665.99	1.51974	0.603827	1.24033e-10	1.21088e-08
ENSMUSG00000032118	Fez1	87.8128	69.7012	105.924	1.51969	0.603778	0.00561497	0.0502284
ENSMUSG00000032297	Celf6	1.84116	1.46148	2.22085	1.51959	0.603685	0.918282	1
ENSMUSG00000027022	Xirp2	13929.3	11058.4	16800.3	1.51923	0.603343	6.48848e-11	6.68797e-09
ENSMUSG00000085411	Gm14319	7.59349	6.02889	9.15808	1.51903	0.603153	0.639585	0.94963
ENSMUSG00000027375	Mal	104.973	83.3606	126.586	1.51853	0.602678	0.00190517	0.0221747
ENSMUSG00000049721	Gal3st1	7.18899	5.7108	8.66719	1.51768	0.601871	0.3637	0.768259
ENSMUSG00000001103	Sebox	1.04993	0.83432	1.26554	1.51685	0.601079	1	1
ENSMUSG00000073067	9130019P16Rik	10.8441	8.61825	13.07	1.51655	0.60079	0.51811	0.886621
ENSMUSG00000090659	Zfp493	49.7382	39.5323	59.944	1.51633	0.600586	0.0242608	0.148973
ENSMUSG00000079457	Gm7609	10.3211	8.20508	12.4372	1.51579	0.600073	0.204195	0.578317
ENSMUSG00000086694	Gm16237	11.8845	9.44956	14.3195	1.51536	0.599664	0.330918	0.734613
ENSMUSG00000089729	Gm16552	2.74226	2.1807	3.30382	1.51502	0.599341	0.490004	0.867885
ENSMUSG00000091849	Gm17188	12.8026	10.1831	15.422	1.51447	0.598812	0.345698	0.750268
ENSMUSG00000025496	Drd4	0.520881	0.414325	0.627437	1.51436	0.598707	1	1
ENSMUSG00000029193	Cckar	0.520881	0.414325	0.627437	1.51436	0.598707	1	1
ENSMUSG00000050762	Prss27	0.520881	0.414325	0.627437	1.51436	0.598707	1	1
ENSMUSG00000058741	Prr19	0.520881	0.414325	0.627437	1.51436	0.598707	1	1
ENSMUSG00000059639	Clec4a4	0.520881	0.414325	0.627437	1.51436	0.598707	1	1
ENSMUSG00000076475	Trbv19	0.520881	0.414325	0.627437	1.51436	0.598707	1	1
ENSMUSG00000086713	4930407G08Rik	0.520881	0.414325	0.627437	1.51436	0.598707	1	1
ENSMUSG00000091255	Speer4e	0.520881	0.414325	0.627437	1.51436	0.598707	1	1
ENSMUSG00000091556	Gm14569	0.520881	0.414325	0.627437	1.51436	0.598707	1	1
ENSMUSG00000093048		0.520881	0.414325	0.627437	1.51436	0.598707	1	1
ENSMUSG00000029189	Sel1l3	64.9458	51.6618	78.2299	1.51427	0.598624	0.00660459	0.0568184
ENSMUSG00000030717	Nupr1	199.461	158.685	240.238	1.51393	0.598299	0.000101704	0.00206777
ENSMUSG00000004360	9330159F19Rik	2.08827	1.66147	2.51508	1.51377	0.598147	0.795926	1
ENSMUSG00000032122	Slc37a2	270.37	215.123	325.617	1.51363	0.598017	3.75689e-06	0.000124263
ENSMUSG00000082226	Gm715	7.45572	5.93231	8.97913	1.5136	0.597982	0.450088	0.837908
ENSMUSG00000037348	Paqr7	1079.21	858.788	1299.62	1.51332	0.597718	3.8831e-09	2.79769e-07
ENSMUSG00000054072	Iigp1	627.834	499.69	755.978	1.51289	0.59731	1.55912e-07	7.76442e-06
ENSMUSG00000027335	Adra1d	160.5	127.753	193.247	1.51266	0.597091	0.000981071	0.0132087
ENSMUSG00000065593	Mir339	12.0146	9.56616	14.4631	1.5119	0.596366	0.546273	0.901565
ENSMUSG00000055546	Timd4	31.7205	25.2628	38.1783	1.51125	0.595738	0.083955	0.343461
ENSMUSG00000048520	Fbxl13	27.1607	21.6323	32.6892	1.51113	0.595629	0.252944	0.644267
ENSMUSG00000021125	Arg2	7.84024	6.24589	9.4346	1.51053	0.595055	0.46105	0.847349
ENSMUSG00000093174		1.04726	0.83432	1.26021	1.51046	0.594987	1	1
ENSMUSG00000083988	Gm15633	4.83146	3.84934	5.81357	1.51028	0.594812	0.492996	0.869917
ENSMUSG00000070806	Zmynd12	6.52444	5.19874	7.85014	1.51001	0.594557	0.581295	0.921801
ENSMUSG00000052271	Bhlha15	4.56377	3.63651	5.49103	1.50997	0.594521	0.559111	0.909175
ENSMUSG00000028524	Sgip1	775.822	618.275	933.368	1.50963	0.594196	3.33603e-07	1.52747e-05
ENSMUSG00000024922	Ovol1	41.5869	33.1501	50.0236	1.509	0.593596	0.0501116	0.246509
ENSMUSG00000027895	Kcnc4	46.5445	37.1062	55.9827	1.50871	0.59332	0.090685	0.359898
ENSMUSG00000081551	Gm14654	8.99234	7.16927	10.8154	1.50858	0.593191	0.175715	0.53168
ENSMUSG00000040441	Slc26a10	4581.4	3652.59	5510.2	1.50858	0.593187	6.49753e-12	8.32323e-10
ENSMUSG00000020712	Tcam1	5.86231	4.67383	7.0508	1.50857	0.593181	0.776372	0.997699
ENSMUSG00000042604	Kcna4	473.207	377.358	569.056	1.508	0.592634	1.0384e-06	4.184e-05
ENSMUSG00000044827	Tlr1	47.0734	37.5421	56.6048	1.50777	0.592417	0.117501	0.421331
ENSMUSG00000091154	1700024N20Rik	25.7961	20.5764	31.0158	1.50734	0.59201	0.215784	0.596109
ENSMUSG00000029601	Iqcd	19.6809	15.6996	23.6621	1.50718	0.591851	0.157678	0.499024
ENSMUSG00000026580	Selp	31.2151	24.9023	37.5278	1.507	0.59168	0.156496	0.497773
ENSMUSG00000027398	Il1b	40.6809	32.4569	48.9048	1.50676	0.59145	0.119103	0.42468
ENSMUSG00000085167	Gm12063	3.38623	2.70295	4.06952	1.50558	0.590323	0.761643	0.992304
ENSMUSG00000085180	AI838599	263.624	210.454	316.794	1.50528	0.590036	0.000164141	0.00307223
ENSMUSG00000085508	Gm13965	1.81601	1.45014	2.18187	1.5046	0.589377	1	1
ENSMUSG00000086477	Gm15506	29.4012	23.4779	35.3246	1.50459	0.58937	0.1479	0.482361
ENSMUSG00000083816	Gm13033	38.544	30.7796	46.3083	1.50451	0.589298	0.109838	0.40434
ENSMUSG00000021478	Drd1a	20.9401	16.7241	25.1562	1.50419	0.588986	0.238456	0.62634
ENSMUSG00000047671	Tctex1d4	1.0446	0.83432	1.25487	1.50407	0.58887	1	1
ENSMUSG00000091922	Gm17409	1.82076	1.4543	2.18721	1.50395	0.58876	0.772588	0.996417
ENSMUSG00000006411	Pvrl4	20.6893	16.5256	24.8531	1.50391	0.588722	0.267258	0.663116
ENSMUSG00000022991	Lalba	9.61468	7.68018	11.5492	1.50377	0.58858	0.332218	0.735876
ENSMUSG00000032517	Mobp	2.33897	1.86863	2.80931	1.50341	0.588236	0.814474	1
ENSMUSG00000038233	Fam198a	225.679	180.314	271.045	1.50319	0.588025	5.02236e-05	0.00114433
ENSMUSG00000005950	P2rx5	556.271	444.456	668.087	1.50316	0.587994	6.32844e-08	3.48867e-06
ENSMUSG00000011267	Zfp296	24.0592	19.224	28.8943	1.50303	0.587873	0.128993	0.444941
ENSMUSG00000091177	Gm15494	5.05891	4.04366	6.07415	1.50214	0.587021	0.51117	0.88259
ENSMUSG00000064281	Rpl19-ps1	10.816	8.64544	12.9866	1.50214	0.587016	0.661706	0.959349
ENSMUSG00000005952	Trpv1	7.81374	6.24589	9.38159	1.50204	0.586926	0.508316	0.880341
ENSMUSG00000086844	B230206H07Rik	5.3281	4.2595	6.3967	1.50175	0.586642	0.7601	0.992304
ENSMUSG00000030317	Timp4	262.019	209.471	314.566	1.50171	0.586608	2.56644e-05	0.000650741
ENSMUSG00000070891	Gm12689	12.8756	10.2937	15.4574	1.50163	0.586534	0.214972	0.595127
ENSMUSG00000022309	Angpt1	828.499	662.377	994.621	1.50159	0.586494	1.16668e-08	7.74093e-07
ENSMUSG00000017167	Cntnap1	442.294	353.621	530.967	1.50152	0.586421	2.66419e-06	9.40146e-05
ENSMUSG00000005628	Tmod4	324.674	259.591	389.757	1.50143	0.586336	1.09106e-05	0.000313605
ENSMUSG00000083061	Gm12191	164.813	131.797	197.829	1.50101	0.585935	0.000340081	0.00552532
ENSMUSG00000048652	Samd13	28.2101	22.5613	33.8588	1.50075	0.58568	0.123864	0.434604
ENSMUSG00000046287	Pnma3	1.29512	1.03581	1.55444	1.50069	0.585628	1	1
ENSMUSG00000047586	Nccrp1	1.29987	1.03998	1.55977	1.49981	0.584778	0.697526	0.972057
ENSMUSG00000082870	Gm12165	7.66385	6.1323	9.19541	1.4995	0.584486	0.405386	0.803989
ENSMUSG00000079491	H2-T10	70.3663	56.3114	84.4213	1.49919	0.58418	0.0123736	0.0910998
ENSMUSG00000089842	Gm16338	9.08514	7.27152	10.8988	1.49883	0.583836	0.266841	0.662572
ENSMUSG00000020658	Efr3b	2606.8	2086.77	3126.82	1.4984	0.583423	9.3346e-11	9.44584e-09
ENSMUSG00000096144		3.76812	3.01653	4.51972	1.49832	0.583344	0.691719	0.969615
ENSMUSG00000038521	C1s	1384.94	1108.73	1661.16	1.49825	0.583283	6.00867e-10	5.24244e-08
ENSMUSG00000033006	Sox10	79.2772	63.5022	95.0523	1.49683	0.581915	0.0085043	0.0687322
ENSMUSG00000063751	Gm13939	1.81542	1.4543	2.17654	1.49662	0.581709	0.772675	0.996417
ENSMUSG00000089429		4.40851	3.5316	5.28541	1.49661	0.581695	0.806777	1
ENSMUSG00000087394	Gm12945	3.1168	2.49729	3.73631	1.49615	0.581251	0.953681	1
ENSMUSG00000041548	Hspb8	10828.7	8677.96	12979.5	1.49568	0.580803	8.18762e-12	1.02512e-09
ENSMUSG00000055775	Myh8	60.3284	48.3463	72.3105	1.49568	0.580799	0.0742331	0.318219
ENSMUSG00000026170	Cyp27a1	744.511	596.662	892.36	1.49559	0.580712	1.59625e-07	7.91378e-06
ENSMUSG00000050737	Ptges	45.4125	36.3968	54.4281	1.49541	0.58054	0.0698041	0.307183
ENSMUSG00000081291	Gm14738	106.142	85.0703	127.214	1.49539	0.580526	0.0279807	0.164109
ENSMUSG00000060579	Fhit	72.6089	58.2054	87.0123	1.49492	0.580068	0.00490947	0.0455797
ENSMUSG00000031230	Fgf16	974.772	781.512	1168.03	1.49458	0.579738	3.16821e-09	2.34818e-07
ENSMUSG00000041809	Efhc1	75.4764	60.5159	90.437	1.49444	0.5796	0.0150437	0.10487
ENSMUSG00000054931	Zkscan4	97.1003	77.8558	116.345	1.49436	0.579532	0.0100643	0.0781208
ENSMUSG00000096126		3.10522	2.49012	3.72031	1.49403	0.579211	0.853109	1
ENSMUSG00000087541	Gm15830	137.345	110.152	164.538	1.49373	0.578918	0.0024844	0.0272423
ENSMUSG00000087206	Gm16175	5.32495	4.27084	6.37905	1.49363	0.578821	0.605071	0.933968
ENSMUSG00000064299	4921528I07Rik	1.29796	1.04148	1.55444	1.49252	0.577753	1	1
ENSMUSG00000021057	Akap5	809.18	649.351	969.008	1.49227	0.577511	1.81555e-07	8.82331e-06
ENSMUSG00000036186	Fam69b	440.596	353.638	527.555	1.49179	0.577048	3.86775e-06	0.000126811
ENSMUSG00000075529	BC028471	4.00723	3.21652	4.79795	1.49166	0.576919	0.613866	0.938533
ENSMUSG00000061742	Slc22a12	0.774244	0.621488	0.926999	1.49158	0.576842	1	1
ENSMUSG00000081852	Gm12281	0.774244	0.621488	0.926999	1.49158	0.576842	1	1
ENSMUSG00000031842	Pde4c	534.376	429.113	639.639	1.49061	0.575902	4.64895e-07	2.04415e-05
ENSMUSG00000083355	Gm11581	12.0228	9.65522	14.3904	1.49043	0.575728	0.321109	0.723787
ENSMUSG00000063442	Gm7117	46.8435	37.6213	56.0657	1.49027	0.57557	0.101167	0.384755
ENSMUSG00000078771	Evi2a	113.925	91.5008	136.349	1.49014	0.575445	0.00305329	0.032053
ENSMUSG00000056553	Ptprn2	10.7409	8.62809	12.8537	1.48975	0.575071	0.370378	0.773457
ENSMUSG00000030737	Slco2b1	984.666	790.994	1178.34	1.48969	0.575013	7.10584e-08	3.82215e-06
ENSMUSG00000034387	D630042P16Rik	700.306	562.572	838.039	1.48966	0.574979	5.82476e-07	2.47759e-05
ENSMUSG00000026222	Sp100	2123.81	1706.13	2541.5	1.48964	0.574959	1.05044e-09	8.65386e-08
ENSMUSG00000052979	6530403G13Rik	1.29454	1.03998	1.5491	1.48955	0.57488	0.697823	0.972057
ENSMUSG00000078498	Gm13151	1.29454	1.03998	1.5491	1.48955	0.57488	0.697823	0.972057
ENSMUSG00000049630	C1ql3	10.6125	8.52734	12.6977	1.48906	0.574403	0.360633	0.76471
ENSMUSG00000023259	Slc26a6	860.385	691.492	1029.28	1.48849	0.573847	3.99963e-08	2.32031e-06
ENSMUSG00000048292	Olfr1417	2.84036	2.28295	3.39777	1.48832	0.573687	0.842185	1
ENSMUSG00000085232	Gm11962	7.36987	5.92363	8.81611	1.4883	0.573661	0.362005	0.766374
ENSMUSG00000084091	Gm11995	3.88513	3.12294	4.64731	1.48812	0.57349	0.691373	0.969615
ENSMUSG00000069136	A130006I12Rik	15.2584	12.2661	18.2508	1.4879	0.573281	0.317389	0.720292
ENSMUSG00000035522	Tsga8	2.19181	1.76221	2.62141	1.48757	0.572955	0.814411	1
ENSMUSG00000076431	Sox4	8942.03	7189.92	10694.1	1.48738	0.572774	4.76026e-10	4.1862e-08
ENSMUSG00000014852	Adamts13	35.5072	28.554	42.4604	1.48702	0.572426	0.0294307	0.170513
ENSMUSG00000020216	Jsrp1	32.1776	25.8774	38.4778	1.48693	0.572333	0.208954	0.585637
ENSMUSG00000051067	Lingo3	416.999	335.354	498.644	1.48692	0.572327	2.68382e-05	0.000674333
ENSMUSG00000034818	Celf5	24.302	19.5448	29.0592	1.4868	0.572211	0.15909	0.501865
ENSMUSG00000036533	Cdc42ep3	2183.18	1756.25	2610.11	1.48618	0.571609	1.24517e-09	1.01823e-07
ENSMUSG00000030911	Zp2	28.6914	23.0809	34.302	1.48616	0.571592	0.253774	0.645534
ENSMUSG00000039699	Batf2	20.2874	16.3226	24.2522	1.48581	0.571247	0.229316	0.614958
ENSMUSG00000032500	Dclk3	14.5975	11.7454	17.4497	1.48566	0.571108	0.359283	0.762938
ENSMUSG00000031549	Ido2	16.3976	13.1955	19.5996	1.48532	0.570778	0.374712	0.776727
ENSMUSG00000042988	Notum	25.8094	20.7749	30.8439	1.48467	0.570141	0.180094	0.539042
ENSMUSG00000044724	Gpr152	6.07786	4.89233	7.26339	1.48465	0.570121	0.640984	0.95003
ENSMUSG00000073154	9330158H04Rik	447.779	360.451	535.107	1.48455	0.570027	3.77155e-07	1.68511e-05
ENSMUSG00000035456	Prdm8	49.4835	39.8454	59.1216	1.48378	0.569273	0.231452	0.61768
ENSMUSG00000072663	Spef2	4.01016	3.22936	4.79097	1.48357	0.569069	0.613841	0.938533
ENSMUSG00000059776	Gm10071	9.16625	7.38245	10.9501	1.48326	0.568768	0.56615	0.913133
ENSMUSG00000074359	Psg23	39.3394	31.6845	46.9944	1.4832	0.568714	0.0802076	0.334364
ENSMUSG00000030792	Dkkl1	0.771578	0.621488	0.921667	1.483	0.56852	1	1
ENSMUSG00000066652	Lefty2	0.771578	0.621488	0.921667	1.483	0.56852	1	1
ENSMUSG00000085987	Gm13403	0.771578	0.621488	0.921667	1.483	0.56852	1	1
ENSMUSG00000039377	Hlx	852.172	686.541	1017.8	1.48251	0.568043	5.49558e-08	3.04469e-06
ENSMUSG00000083832	Gm13771	1.29263	1.04148	1.54377	1.48228	0.567821	1	1
ENSMUSG00000085565	Gm15721	6.59275	5.31233	7.87318	1.48206	0.567603	0.593019	0.925816
ENSMUSG00000030382	Slc27a5	5.16077	4.15876	6.16277	1.48188	0.567427	0.751662	0.990077
ENSMUSG00000051054	1700014D04Rik	5.41923	4.36742	6.47103	1.48166	0.567214	0.839636	1
ENSMUSG00000070509	Rgma	2298	1852	2744.01	1.48165	0.567207	4.20197e-10	3.73975e-08
ENSMUSG00000048442	2210020M01Rik	1298.69	1046.86	1550.52	1.48111	0.566681	5.19013e-09	3.65138e-07
ENSMUSG00000092241	Gm20522	66.9203	53.9587	79.8819	1.48043	0.566014	0.00533728	0.0482774
ENSMUSG00000022769	Sdf2l1	269.292	217.204	321.379	1.47962	0.565226	1.2778e-05	0.000358824
ENSMUSG00000036162	1700066J24Rik	1.54049	1.24298	1.838	1.47871	0.56434	1	1
ENSMUSG00000036949	Slc39a12	2.31757	1.87013	2.765	1.47851	0.564139	1	1
ENSMUSG00000057244	Gm6139	3.09465	2.49729	3.692	1.4784	0.564039	0.953154	1
ENSMUSG00000043003	Rasef	25.1141	20.267	29.9612	1.47832	0.563961	0.186713	0.549909
ENSMUSG00000005202	Shbg	0.777078	0.627157	0.926999	1.4781	0.563741	1	1
ENSMUSG00000009646	Pla2g12b	0.777078	0.627157	0.926999	1.4781	0.563741	1	1
ENSMUSG00000086850	Gm13257	0.777078	0.627157	0.926999	1.4781	0.563741	1	1
ENSMUSG00000089313		0.777078	0.627157	0.926999	1.4781	0.563741	1	1
ENSMUSG00000087143	A830082K12Rik	93.873	75.7686	111.977	1.47788	0.563533	0.0130541	0.0946847
ENSMUSG00000082640	Gm11402	1.80127	1.4543	2.14823	1.47715	0.562819	0.772906	0.996417
ENSMUSG00000032207	Lipc	12.4961	10.0896	14.9026	1.47704	0.562705	0.346549	0.75106
ENSMUSG00000045942	BC049762	10.4264	8.42092	12.4319	1.47631	0.561994	0.361414	0.765414
ENSMUSG00000092021	Gbp11	4.23683	3.42218	5.05149	1.4761	0.561795	0.51744	0.886453
ENSMUSG00000078601	Gm12525	2.18846	1.76788	2.60903	1.47579	0.561492	0.795286	1
ENSMUSG00000049252	Lrp1b	15.2039	12.2846	18.1232	1.47527	0.560984	0.285766	0.685079
ENSMUSG00000028057	Rit1	2747.79	2220.21	3275.37	1.47525	0.560959	8.89772e-10	7.44085e-08
ENSMUSG00000032105	Pdzd3	156.325	126.318	186.332	1.47511	0.56082	0.00173171	0.0206008
ENSMUSG00000079163	Gm15498	3.34459	2.70295	3.98623	1.47477	0.560491	0.76159	0.992304
ENSMUSG00000086144	Gm11379	1.4203	1.1479	1.6927	1.4746	0.560327	1	1
ENSMUSG00000028669	1110049F12Rik	932.071	753.311	1110.83	1.4746	0.56032	3.35543e-08	1.98823e-06
ENSMUSG00000041329	Atp1b2	3735.36	3018.97	4451.75	1.47459	0.560317	1.65944e-10	1.57832e-08
ENSMUSG00000071494	Olfr455	0.768912	0.621488	0.916335	1.47442	0.560149	1	1
ENSMUSG00000031883	Car7	435.187	351.807	518.566	1.47401	0.559743	5.76623e-06	0.000178222
ENSMUSG00000075593	Gal3st4	1.54257	1.24714	1.838	1.47377	0.559514	0.742152	0.988012
ENSMUSG00000085846	Gm15597	1.02494	0.828651	1.22123	1.47376	0.559499	1	1
ENSMUSG00000027867	Spag17	4.24203	3.43085	5.05321	1.47287	0.558631	0.718876	0.977338
ENSMUSG00000002500	Rpl3l	1561.99	1263.39	1860.59	1.47269	0.558455	2.33046e-09	1.78703e-07
ENSMUSG00000035678	Tnfsf9	52.3702	42.3593	62.3811	1.47267	0.55843	0.115205	0.416418
ENSMUSG00000024011	Pi16	3607.32	2918.11	4296.54	1.47237	0.558141	3.12281e-10	2.85969e-08
ENSMUSG00000019933	2310015B20Rik	13.608	11.0088	16.2072	1.4722	0.557977	0.237531	0.625021
ENSMUSG00000086589	Gm12915	7.96773	6.44588	9.48957	1.47219	0.557967	0.460468	0.846911
ENSMUSG00000027995	Tlr2	229.153	185.407	272.898	1.47189	0.55767	0.000133959	0.0026018
ENSMUSG00000025735	Rhbdl1	26.928	21.796	32.06	1.47091	0.556707	0.0869325	0.351043
ENSMUSG00000058745	Gm9174	7.83037	6.33946	9.32129	1.47036	0.556169	0.508265	0.880341
ENSMUSG00000091297	Gm8439	3.8479	3.11577	4.58002	1.46995	0.555766	0.594204	0.926617
ENSMUSG00000023064	Sncg	58.7641	47.5844	69.9439	1.46989	0.555709	0.0578073	0.270826
ENSMUSG00000086096	Gm12688	7.71104	6.24438	9.1777	1.46975	0.555573	0.390773	0.792584
ENSMUSG00000060777	Gm10087	0.774412	0.627157	0.921667	1.46959	0.555418	1	1
ENSMUSG00000087322	Gm16075	0.774412	0.627157	0.921667	1.46959	0.555418	1	1
ENSMUSG00000053063	Clec12a	74.8159	60.6306	89.0012	1.46793	0.553779	0.0116727	0.08735
ENSMUSG00000073802	Cdkn2b	16.803	13.6182	19.9878	1.46773	0.553587	0.229732	0.614985
ENSMUSG00000052684	Jun	6917.86	5607.32	8228.39	1.46744	0.553299	5.85062e-11	6.05868e-09
ENSMUSG00000023473	Celsr3	142.625	115.613	169.637	1.46728	0.553145	0.00161003	0.0195613
ENSMUSG00000015224	Cyp2j9	105.551	85.5756	125.526	1.46684	0.552715	0.00496591	0.0459305
ENSMUSG00000034872	Gipc3	159.714	129.5	189.927	1.46662	0.5525	0.00358832	0.0361587
ENSMUSG00000067714	Lpar5	6.54058	5.30365	7.77752	1.46645	0.552324	0.443512	0.832408
ENSMUSG00000021367	Edn1	524.782	425.545	624.019	1.4664	0.55228	4.84474e-07	2.10106e-05
ENSMUSG00000050350	Gpr18	8.20427	6.65304	9.75549	1.46632	0.552201	0.471754	0.856902
ENSMUSG00000061540	Orm2	1.80219	1.46148	2.1429	1.46625	0.552135	0.917731	1
ENSMUSG00000039131	Gipc2	179.841	145.863	213.819	1.46589	0.551774	0.00122242	0.0158144
ENSMUSG00000087367	Gm15491	11.9041	9.65522	14.1529	1.46583	0.551715	0.321568	0.72401
ENSMUSG00000030474	Siglece	54.0979	43.8815	64.3143	1.46563	0.551526	0.0812897	0.336974
ENSMUSG00000073608	Gm6086	278.946	226.269	331.623	1.46561	0.551501	0.000182312	0.0033335
ENSMUSG00000084340	Gm14766	2.05005	1.66297	2.43713	1.46553	0.551419	1	1
ENSMUSG00000060981	Hist1h4h	200.739	162.856	238.623	1.46524	0.551135	0.00118282	0.015392
ENSMUSG00000022219	Cideb	51.9001	42.1106	61.6895	1.46494	0.550841	0.0755057	0.32163
ENSMUSG00000026870	D730039F16Rik	48.0374	38.9847	57.0901	1.46442	0.550334	0.0679413	0.301965
ENSMUSG00000045871	Slitrk6	311.452	252.782	370.123	1.4642	0.55011	0.000393723	0.00627268
ENSMUSG00000028427	Aqp7	1611.24	1307.74	1914.73	1.46416	0.550068	8.67135e-08	4.57537e-06
ENSMUSG00000021622	Ckmt2	56292.3	45691.9	66892.7	1.464	0.549911	2.61399e-12	3.66637e-10
ENSMUSG00000030889	Vwa3a	611.039	496.092	725.986	1.46341	0.549335	5.1808e-07	2.24242e-05
ENSMUSG00000095651		45.3469	36.8183	53.8754	1.46328	0.549203	0.137341	0.461713
ENSMUSG00000003476	Crhr2	1694.53	1376.01	2013.05	1.46296	0.548894	3.88831e-09	2.79769e-07
ENSMUSG00000037583	Nr0b2	385.332	312.931	457.733	1.46273	0.548664	1.42025e-05	0.000390984
[truncated: 20,197 more rows]
