# Supplementary material for: Complete cardiac regeneration in a mouse model of myocardial infarction
Source: Aging (Albany NY). 2012 Dec 31;4(12):966–77. doi: 10.18632/aging.100526 (PMC3615162; doi:10.18632/aging.100526)
Supplement: Supplementary file 7 [file aging-04-966-s007.xlsx]

## Sheet: Sheet1
Reactome ID	FDR*	Description
P1vP3
2675847	2.38453e-34	Cell Cycle, Mitotic
2675848	1.74852e-30	Cell Cycle
2675849	4.02798e-30	DNA Replication
2675846	1.18538e-24	Mitotic M-M/G1 phases
2676277	5.08236e-23	M Phase
2676324	3.23239e-22	Mitotic Prometaphase
2675866	7.98665e-16	DNA strand elongation
2675882	1.16464e-14	G2/M Checkpoints
2675857	5.0179e-13	Activation of the pre-replicative complex
2675859	3.19183e-11	Mitotic G1-G1/S phases
2676423	9.36785e-11	Telomere C-strand (Lagging Strand) Synthesis
2675881	1.17954e-10	Activation of ATR in response to replication stress
2676219	1.40329e-09	E2F mediated regulation of DNA replication
2676326	1.4634e-09	Extension of Telomeres
2675867	2.14476e-09	Lagging Strand Synthesis
2675858	1.77557e-08	G1/S Transition
2675856	6.79543e-08	S Phase
2676841	9.06613e-08	G1/S-Specific Transcription
2676921	1.93451e-07	G0 and Early G1
2675868	3.21317e-07	Processive synthesis on the lagging strand
P3vP10
2675847	1.78241e-15	Cell Cycle, Mitotic
2675849	1.78241e-15	DNA Replication
2675848	1.70477e-12	Cell Cycle
2675882	2.3607e-12	G2/M Checkpoints
2676277	2.86603e-11	M Phase
2676324	2.86603e-11	Mitotic Prometaphase
2675846	3.85715e-11	Mitotic M-M/G1 phases
2675881	1.58187e-10	Activation of ATR in response to replication stress
2675887	1.58187e-10	Metabolism
2676129	1.76583e-09	Axon guidance
2675866	7.12055e-09	DNA strand elongation
2676130	9.51991e-09	Developmental Biology
2675857	4.00782e-08	Activation of the pre-replicative complex
2675999	1.01684e-07	Signal Transduction
2676326	1.37907e-06	Extension of Telomeres
2676423	1.29121e-05	Telomere C-strand (Lagging Strand) Synthesis
2676237	1.36319e-05	Hemostasis
2676038	2.56733e-05	Gap-filling DNA repair synthesis and ligation in GG-NER
2676171	2.56733e-05	Gap-filling DNA repair synthesis and ligation in TC-NER
2676655	3.71122e-05	Semaphorin interactions
P1vP10
2675887	2.69473e-19	Metabolism
2676129	4.91811e-08	Axon guidance
2675999	5.24987e-08	Signal Transduction
2675904	1.10939e-06	The citric acid (TCA) cycle and respiratory electron transport
2675886	1.77862e-06	Metabolism of carbohydrates
2676130	1.77862e-06	Developmental Biology
2676330	1.77862e-06	Respiratory electron transport, ATP synthesis by chemiosmotic coupling, and heat production by uncoupling proteins.
2675922	8.12562e-06	Fatty acid, triacylglycerol, and ketone body metabolism
2676239	1.14595e-05	Integrin cell surface interactions
2675923	2.41671e-05	Metabolism of lipids and lipoproteins
2676005	6.35254e-05	Signaling by PDGF
2676659	0.000156318	NCAM1 interactions
2676860	0.000168051	Interferon gamma signaling
2676667	0.000205345	Nuclear Receptor transcription pathway
2675885	0.000358092	Glucose metabolism
2676018	0.000358092	Immune System
2676999	0.000358092	Collagen biosynthesis and modifying enzymes
2677000	0.000358092	Collagen formation
2676329	0.000428725	Respiratory electron transport
2677026	0.000691045	A tetrasaccharide linker sequence is required for GAG synthesis
Sham v LAD
2676277	8.5374e-16	M Phase
2675847	1.89056e-14	Cell Cycle, Mitotic
2675848	6.3144e-13	Cell Cycle
2675846	9.30074e-13	Mitotic M-M/G1 phases
2675849	9.30074e-13	DNA Replication
2676324	1.18423e-11	Mitotic Prometaphase
2676415	6.8105e-07	Phosphorylation of Emi1
2676381	2.16391e-06	Cyclin A/B1 associated events during G2/M transition
2676273	2.09868e-05	APC/C-mediated degradation of cell cycle proteins
2676274	2.09868e-05	Regulation of mitotic cell cycle
2676980	4.87321e-05	Extracellular matrix organization
2676999	4.92215e-05	Collagen biosynthesis and modifying enzymes
2677000	4.92215e-05	Collagen formation
2676272	8.68221e-05	Regulation of APC/C activators between G1/S and early anaphase
2676711	0.00015945	Striated Muscle Contraction
2676915	0.000275204	Kinesins
2676382	0.000720822	G2/M DNA replication checkpoint
2676383	0.000720822	Cyclin B2 mediated events
2676434	0.000816388	APC-Cdc20 mediated degradation of Nek2A
2676279	0.00131186	G2/M Transition
P10 v Sham
2676277	3.84799e-15	M Phase
2675847	9.98694e-14	Cell Cycle, Mitotic
2676324	4.26187e-13	Mitotic Prometaphase
2675848	1.1849e-12	Cell Cycle
2675849	1.35585e-10	DNA Replication
2675846	2.18374e-10	Mitotic M-M/G1 phases
2676129	1.00345e-05	Axon guidance
2676130	5.28186e-05	Developmental Biology
2676711	0.000101906	Striated Muscle Contraction
2676381	0.000149326	Cyclin A/B1 associated events during G2/M transition
2676020	0.00017672	Muscle contraction
2676279	0.00049233	G2/M Transition
2676667	0.00049233	Nuclear Receptor transcription pathway
2676396	0.000510729	Generic Transcription Pathway
2676280	0.000865944	Mitotic G2-G2/M phases
2675904	0.000969904	The citric acid (TCA) cycle and respiratory electron transport
2676915	0.00171602	Kinesins
2676041	0.00173957	Chk1/Chk2(Cds1) mediated inactivation of Cyclin B:Cdk1 complex
2676165	0.00173957	L1CAM interactions
2675883	0.00436416	G2/M DNA damage checkpoint
P10 v LAD
2676130	0.000163535	Developmental Biology
2676129	0.000171	Axon guidance
2676396	0.000171	Generic Transcription Pathway
2676711	0.000171	Striated Muscle Contraction
2676020	0.000635118	Muscle contraction
2676665	0.0085492	Role of Abl in Robo-Slit signaling
2676845	0.0085492	BMAL1:CLOCK/NPAS2 Activates Circadian Expression
2675922	0.0200503	Fatty acid, triacylglycerol, and ketone body metabolism
2676667	0.0200503	Nuclear Receptor transcription pathway
2676655	0.0311818	Semaphorin interactions
2676742	0.0311818	Circadian Clock
2676360	0.0315642	Initial triggering of complement
2676749	0.0315642	Other semaphorin interactions
2677006	0.0354332	Activation of Gene Expression by SREBP (SREBF)
2676473	0.036956	Cholesterol biosynthesis
2676741	0.036956	Regulation of Lipid Metabolism by Peroxisome proliferator-activated receptor alpha (PPARalpha)
FDR<0.05
