# Supplementary material for: Complete cardiac regeneration in a mouse model of myocardial infarction
Source: Aging (Albany NY). 2012 Dec 31;4(12):966–77. doi: 10.18632/aging.100526 (PMC3615162; doi:10.18632/aging.100526)
Supplement: Supplementary file 8 [file aging-04-966-s008.xlsx]

## Sheet: LADvsShamList
Transcript ID	MGI gene symbol	Mean expression	Mean expression Sham	Mean expression LAD	Fold change LAD/Sham	log2 Fold change LAD/Sham	p value	p value adjusted *
ENSMUSG00000029304	Spp1	903.996	213.823	1594.17	7.45556	2.89832	3.09e-95	3.39e-91
ENSMUSG00000041616	Nppa	10708.5	4284.39	17132.7	3.99885	1.99959	2.33e-68	1.71e-64
ENSMUSG00000021702	Thbs4	1647.33	727.646	2567.01	3.52783	1.81878	1.04e-46	5.68e-43
ENSMUSG00000058914	C1qtnf3	353.39	135.069	571.711	4.23273	2.08159	6.57e-39	2.88e-35
ENSMUSG00000029816	Gpnmb	342.19	140.642	543.737	3.86609	1.95088	4.41e-33	1.61e-29
ENSMUSG00000049382	Krt8	234.371	92.4844	376.258	4.06834	2.02444	6.56e-30	2.06e-26
ENSMUSG00000031250	Tnmd	107.143	26.12	188.167	7.20394	2.84879	2.76e-29	7.56e-26
ENSMUSG00000042254	Cilp	1821.62	1082.78	2560.46	2.3647	1.24166	6.82e-25	1.66e-21
ENSMUSG00000032332	Col12a1	1393.86	803.468	1984.26	2.46962	1.30429	1.79e-24	3.93e-21
ENSMUSG00000031972	Acta1	8402.48	5398.46	11406.5	2.11292	1.07924	5.19e-22	1.03e-18
ENSMUSG00000038418	Egr1	5153.49	6941.38	3365.59	0.48486	-1.04436	5.64e-21	1.03e-17
ENSMUSG00000002020	Ltbp2	1152.33	714.36	1590.3	2.22619	1.15458	4.53e-19	7.64e-16
ENSMUSG00000021250	Fos	828.742	1159.74	497.74	0.429181	-1.22034	7.61e-19	1.19e-15
ENSMUSG00000023043	Krt18	447.467	260.717	634.218	2.43259	1.28249	1.93e-18	2.82e-15
ENSMUSG00000020908	Myh3	133.894	59.1489	208.639	3.52735	1.81859	2.61e-18	3.57e-15
ENSMUSG00000086324	Gm15564	782.151	471.555	1092.75	2.31733	1.21246	6.53e-18	8.42e-15
ENSMUSG00000096768		1424.08	1918.96	929.202	0.484223	-1.04626	7.03e-18	8.57e-15
ENSMUSG00000061100	Retnla	38.9475	5.82527	72.0697	12.3719	3.629	1.7e-17	1.96e-14
ENSMUSG00000027966	Col11a1	512.539	299.037	726.04	2.42793	1.27973	2.45e-17	2.68e-14
ENSMUSG00000076281		11042.5	7470.13	14614.8	1.95643	0.968225	7.84e-16	8.19e-13
ENSMUSG00000052684	Jun	7546.48	9780.83	5312.13	0.543117	-0.880666	5.79e-15	5.77e-12
ENSMUSG00000040809	Chi3l3	31.1614	4.20191	58.121	13.8321	3.78994	8.93e-15	8.51e-12
ENSMUSG00000034990	Otoa	530.977	350.225	711.729	2.0322	1.02304	9.91e-14	9.05e-11
ENSMUSG00000086806	Gm13054	86.8832	37.6352	136.131	3.61712	1.85484	1.1e-13	9.69e-11
ENSMUSG00000035202	Lars2	122326	86126.9	158525	1.8406	0.880175	2.94e-13	2.48e-10
ENSMUSG00000055775	Myh8	155.244	85.8635	224.624	2.61606	1.3874	4.25e-13	3.45e-10
ENSMUSG00000041559	Fmod	697.358	459.796	934.919	2.03333	1.02385	1.2e-12	9.41e-10
ENSMUSG00000045776	Lrtm1	9912.82	12690	7135.63	0.562303	-0.830581	2.05e-12	1.55e-09
ENSMUSG00000050359	Sprr1a	24.6287	3.79762	45.4598	11.9706	3.58142	3.17e-12	2.32e-09
ENSMUSG00000027656	Wisp2	86.7992	39.0226	134.576	3.44866	1.78604	9.76e-12	6.9e-09
ENSMUSG00000001403	Ube2c	2189.91	1643.25	2736.57	1.66533	0.735812	3.25e-11	2.23e-08
ENSMUSG00000020469	Myl7	76.2167	31.516	120.917	3.8367	1.93987	4.01e-11	2.67e-08
ENSMUSG00000027996	Sfrp2	1347.36	972.325	1722.39	1.77142	0.824905	7.72e-11	4.98e-08
ENSMUSG00000026628	Atf3	1403.4	1783.12	1023.69	0.5741	-0.800626	1.92e-10	1.2e-07
ENSMUSG00000028464	Tpm2	6044.03	4634.42	7453.65	1.60832	0.685558	1.08e-09	6.59e-07
ENSMUSG00000050335	Lgals3	206.261	131.985	280.536	2.12552	1.08782	1.34e-09	7.92e-07
ENSMUSG00000022899	Slc15a2	730.64	519.016	942.264	1.81548	0.860352	2.04e-09	1.18e-06
ENSMUSG00000028364	Tnc	2760.01	2117.06	3402.96	1.6074	0.684726	3.26e-09	1.83e-06
ENSMUSG00000056673	Kdm5d	1929.43	2396.58	1462.28	0.610151	-0.712761	3.78e-09	2.07e-06
ENSMUSG00000029167	Ppargc1a	12931.8	15659.7	10203.8	0.651594	-0.617954	5.21e-09	2.79e-06
ENSMUSG00000024042	Sik1	6122.43	7688.26	4556.6	0.59267	-0.7547	5.45e-09	2.85e-06
ENSMUSG00000030996	Art1	1507.36	1890.16	1124.55	0.594954	-0.749151	6.37e-09	3.25e-06
ENSMUSG00000038894	Irs2	1508.57	1916.07	1101.07	0.574653	-0.799237	7.58e-09	3.78e-06
ENSMUSG00000088246		163.965	101.248	226.682	2.23888	1.16277	1.19e-08	5.82e-06
ENSMUSG00000054196	Cthrc1	1027.92	780.569	1275.26	1.63376	0.708198	1.28e-08	6.12e-06
ENSMUSG00000076258		26768.1	20356.5	33179.6	1.62992	0.704804	1.34e-08	6.24e-06
ENSMUSG00000061086	Myl4	674.142	497.739	850.545	1.70882	0.772999	1.54e-08	7.01e-06
ENSMUSG00000020423	Btg2	5110.17	6237.01	3983.34	0.638662	-0.646876	1.69e-08	7.58e-06
ENSMUSG00000027496	Aurka	1318.48	1031.64	1605.33	1.5561	0.637936	2.75e-08	1.21e-05
ENSMUSG00000085591	Gm13479	239.146	309.211	169.08	0.546811	-0.870886	3.27e-08	1.4e-05
ENSMUSG00000020649	Rrm2	5814.83	4643.7	6985.97	1.5044	0.589187	3.34e-08	1.41e-05
ENSMUSG00000069917	Hba-a2	8055.67	9809.98	6301.36	0.642342	-0.638587	3.8e-08	1.57e-05
ENSMUSG00000037989	Wnk2	1435.72	1761.47	1109.96	0.630135	-0.666267	4.05e-08	1.64e-05
ENSMUSG00000020182	Ddc	2949.79	2331.61	3567.98	1.53027	0.613782	6.19e-08	2.44e-05
ENSMUSG00000048387	Osr1	275.135	196.58	353.691	1.79923	0.847376	6.24e-08	2.44e-05
ENSMUSG00000040896	Kcnd3	279.881	361.594	198.168	0.54804	-0.867647	6.98e-08	2.68e-05
ENSMUSG00000069919	Hba-a1	10836.1	13136.8	8535.37	0.649732	-0.622084	7.35e-08	2.78e-05
ENSMUSG00000041431	Ccnb1	2092.24	1668.08	2516.39	1.50855	0.593161	7.48e-08	2.78e-05
ENSMUSG00000023505	Cdca3	2316.81	1844.95	2788.67	1.51151	0.595993	8.5e-08	3.1e-05
ENSMUSG00000038112	AW551984	743.789	568.729	918.849	1.61562	0.692086	9.41e-08	3.38e-05
ENSMUSG00000028197	Col24a1	295.761	209.973	381.55	1.81714	0.861668	1.64e-07	5.72e-05
ENSMUSG00000049723	Mmp12	78.1303	43.7233	112.537	2.57385	1.36393	1.64e-07	5.72e-05
ENSMUSG00000062609	Kcnj15	399.977	290.026	509.929	1.75822	0.814117	1.69e-07	5.8e-05
ENSMUSG00000005233	Spc25	1590.96	1269.06	1912.85	1.5073	0.591962	1.9e-07	6.4e-05
ENSMUSG00000067768	Xlr4b	38.6501	60.7761	16.524	0.271883	-1.87894	1.98e-07	6.58e-05
ENSMUSG00000021587	Pcsk1	40.9894	63.2609	18.7179	0.295884	-1.7569	2.28e-07	7.46e-05
ENSMUSG00000062248	Cks2	1203.59	954.879	1452.31	1.52094	0.604959	2.37e-07	7.63e-05
ENSMUSG00000037628	Cdkn3	398.724	298.921	498.527	1.66776	0.737908	2.6e-07	8.23e-05
ENSMUSG00000041782	Lad1	707.089	869.655	544.523	0.626137	-0.675449	2.63e-07	8.23e-05
ENSMUSG00000037185	Krt80	143.848	95.128	192.568	2.02431	1.01743	2.97e-07	9.16e-05
ENSMUSG00000019942	Cdk1	3038.01	2462.15	3613.87	1.46777	0.553623	3.21e-07	9.79e-05
ENSMUSG00000020330	Hmmr	2723.25	2196.59	3249.91	1.47953	0.565138	3.84e-07	0.000115431
ENSMUSG00000029838	Ptn	3403.58	2720.23	4086.94	1.50242	0.587292	3.94e-07	0.000116826
ENSMUSG00000029762	Akr1b8	472.371	359.568	585.174	1.62744	0.702602	4.2e-07	0.000122754
ENSMUSG00000017716	Birc5	1840.02	1485.37	2194.67	1.47752	0.56318	5.78e-07	0.000166862
ENSMUSG00000069045	Ddx3y	5917.2	7065.4	4769	0.674979	-0.567084	6.18e-07	0.000175883
ENSMUSG00000024190	Dusp1	7669.21	9209.76	6128.66	0.665453	-0.587592	8.71e-07	0.000244893
ENSMUSG00000004939	Nmrk2	3347.01	2722.06	3971.96	1.45917	0.545151	8.89e-07	0.000246677
ENSMUSG00000022322	Shcbp1	890.374	704.484	1076.26	1.52774	0.611395	9.91e-07	0.00027159
ENSMUSG00000028873	Cdca8	1898.08	1538.91	2257.25	1.46678	0.552657	1.05e-06	0.000283361
ENSMUSG00000027331	D2Ertd750e	2388.56	1945.78	2831.34	1.45512	0.541133	1.09e-06	0.000290147
ENSMUSG00000028613	Lrp8	115.535	74.4107	156.66	2.10534	1.07406	1.34e-06	0.000348767
ENSMUSG00000095562		87.8033	121.31	54.2969	0.44759	-1.15975	1.33e-06	0.000348767
ENSMUSG00000040133	Gpr176	102.433	65.1497	139.716	2.14453	1.10066	1.38e-06	0.000356204
ENSMUSG00000024164	C3	989.664	852.073	1127.25	1.32296	0.403765	1.42e-06	0.000361431
ENSMUSG00000054958	Nt5c1a	426.166	519.604	332.727	0.640348	-0.643073	1.58e-06	0.000397687
ENSMUSG00000055632	Hmcn2	5001.14	5949.57	4052.72	0.681179	-0.553893	1.64e-06	0.000407416
ENSMUSG00000026622	Nek2	1356.56	1098.24	1614.89	1.47043	0.556234	1.79e-06	0.000436166
ENSMUSG00000032338	Hcn4	264.599	330.111	199.087	0.603089	-0.729557	1.79e-06	0.000436166
ENSMUSG00000045875	Adra1a	95.4671	128.676	62.2582	0.483837	-1.04741	1.82e-06	0.0004374
ENSMUSG00000051048	P4ha3	271.224	198.954	343.494	1.7265	0.787851	1.87e-06	0.000445214
ENSMUSG00000037725	Ckap2	2145.58	1754.96	2536.2	1.44516	0.531227	1.9e-06	0.00044686
ENSMUSG00000068457	Uty	1912.18	2277.17	1547.18	0.679431	-0.557602	1.93e-06	0.00045002
ENSMUSG00000027887	Sypl2	70.4415	41.667	99.2159	2.38116	1.25167	1.97e-06	0.000453758
ENSMUSG00000006398	Cdc20	2311.98	1898.23	2725.74	1.43594	0.521995	2.04e-06	0.000466406
ENSMUSG00000047085	Lrrc4b	1733.18	2064.52	1401.84	0.679012	-0.558491	2.17e-06	0.000490023
ENSMUSG00000068196	Col8a1	1979.72	1575.7	2383.74	1.51282	0.597236	2.26e-06	0.000505276
ENSMUSG00000020407	Upp1	1820.7	1492.4	2149.01	1.43997	0.526041	2.54e-06	0.000559595
ENSMUSG00000056973	Ces1d	169.119	220.334	117.904	0.535116	-0.902076	2.55e-06	0.000559595
ENSMUSG00000028626	Col9a2	339.63	255.502	423.758	1.65853	0.729905	2.64e-06	0.000573918
ENSMUSG00000022037	Clu	10461	8522.94	12399.1	1.45479	0.540815	3.12e-06	0.000669986
ENSMUSG00000091562	Gm9581	986.829	1146.4	827.253	0.721607	-0.470715	3.22e-06	0.000684982
ENSMUSG00000027715	Ccna2	4453.13	3678.29	5227.97	1.42131	0.507217	3.37e-06	0.000709985
ENSMUSG00000048327	Ckap2l	2807.53	2315.34	3299.73	1.42516	0.511125	3.44e-06	0.000717643
ENSMUSG00000026051	1500015O10Rik	89.3123	54.7073	123.917	2.26509	1.17957	3.64e-06	0.000731959
ENSMUSG00000028678	Kif2c	999.172	810.047	1188.3	1.46695	0.55282	3.64e-06	0.000731959
ENSMUSG00000028832	Stmn1	2394.65	1976.79	2812.51	1.42276	0.508697	3.55e-06	0.000731959
ENSMUSG00000093098	Mir5102	32.1755	13.6738	50.6771	3.70616	1.88993	3.6e-06	0.000731959
ENSMUSG00000027654	Fam83d	889.788	719.747	1059.83	1.4725	0.55827	3.9e-06	0.000777311
ENSMUSG00000027559	Car3	49.0218	25.4069	72.6368	2.85895	1.51548	4.36e-06	0.000860345
ENSMUSG00000018830	Myh11	4416.82	5175.17	3658.46	0.706926	-0.500369	4.89e-06	0.000957745
ENSMUSG00000032218	Ccnb2	1881.41	1550.04	2212.77	1.42756	0.513548	5.27e-06	0.00102307
ENSMUSG00000030867	Plk1	1271.52	1041.63	1501.42	1.44142	0.527488	5.58e-06	0.00107225
ENSMUSG00000026683	Nuf2	1692.6	1391.15	1994.05	1.43338	0.519424	5.95e-06	0.00113425
ENSMUSG00000044749	Abca6	1046.86	1221.09	872.624	0.714625	-0.484742	6e-06	0.00113484
ENSMUSG00000023015	Racgap1	4034.41	3351.78	4717.03	1.40732	0.492953	6.44e-06	0.00119661
ENSMUSG00000037544	Dlgap5	1195.03	974.953	1415.11	1.45147	0.53751	6.44e-06	0.00119661
ENSMUSG00000060716	Plekhh1	2823.51	3290.19	2356.83	0.716321	-0.481322	6.57e-06	0.0012112
ENSMUSG00000005667	Mthfd2	638.725	510.426	767.025	1.50272	0.587573	6.64e-06	0.00121271
ENSMUSG00000034317	Trim59	1471.18	1195.36	1746.99	1.46147	0.547423	6.83e-06	0.00123658
ENSMUSG00000029685	Asb15	2684.11	3167.73	2200.48	0.694655	-0.525631	6.88e-06	0.00123667
ENSMUSG00000003779	Kif20a	2318.17	1913.9	2722.44	1.42246	0.508383	7.34e-06	0.00130903
ENSMUSG00000020427	Igfbp3	2101.13	1726.26	2476	1.43431	0.52036	7.61e-06	0.00134477
ENSMUSG00000038642	Ctss	994.491	803.1	1185.88	1.47663	0.562307	7.9e-06	0.00138561
ENSMUSG00000051811	Cox6b2	264.019	199.707	328.331	1.64406	0.717266	8.13e-06	0.00141504
ENSMUSG00000029019	Nppb	16375.7	13975.1	18776.3	1.34356	0.426058	8.67e-06	0.00149596
ENSMUSG00000028068	Iqgap3	3552.72	2957.99	4147.45	1.40212	0.487608	8.95e-06	0.00153275
ENSMUSG00000096449		10398.4	12105	8691.75	0.71803	-0.477884	9.27e-06	0.00157457
ENSMUSG00000047842	Diras2	196.962	144.233	249.691	1.73116	0.791739	1.01e-05	0.00169559
ENSMUSG00000041064	Pif1	599.707	480.014	719.4	1.49871	0.583718	1.02e-05	0.00170465
ENSMUSG00000060882	Kcnd2	916.074	1103.74	728.409	0.659948	-0.599576	1.06e-05	0.00176841
ENSMUSG00000034413	Neurl1b	2510.35	2103.21	2917.49	1.38716	0.47213	1.17e-05	0.00193618
ENSMUSG00000043091	Tuba1c	2873.67	2417.4	3329.94	1.37749	0.46204	1.29e-05	0.00210893
ENSMUSG00000039470	Zdhhc2	1359.99	1123.32	1596.65	1.42137	0.507279	1.47e-05	0.00238653
ENSMUSG00000086596	Susd5	104.891	137.266	72.5159	0.528286	-0.920608	1.61e-05	0.00258935
ENSMUSG00000028175	Depdc1a	949.493	773.7	1125.29	1.45442	0.540448	1.71e-05	0.00273364
ENSMUSG00000026824	Kcnj3	1793.95	2102.92	1484.98	0.706151	-0.501952	1.81e-05	0.00287303
ENSMUSG00000028262	Clca2	33.8318	16.9215	50.7421	2.99867	1.58432	1.82e-05	0.00287303
ENSMUSG00000022033	Pbk	1223.89	1013.59	1434.19	1.41497	0.500768	1.86e-05	0.00291472
ENSMUSG00000030772	Dkk3	2000.01	1651.85	2348.18	1.42154	0.507456	1.93e-05	0.00299796
ENSMUSG00000022385	Gtse1	777.914	637.037	918.792	1.44229	0.528362	2.16e-05	0.00333899
ENSMUSG00000023034	Nr4a1	5720.16	6944.62	4495.69	0.647363	-0.627353	2.23e-05	0.00341771
ENSMUSG00000031849	Comp	162.938	115.243	210.633	1.82773	0.870053	2.34e-05	0.00356588
ENSMUSG00000046805	Mpeg1	988.995	808.803	1169.19	1.44558	0.531644	2.42e-05	0.00366242
ENSMUSG00000073125	Xlr3b	305.814	387.844	223.784	0.576996	-0.793367	2.57e-05	0.00385184
ENSMUSG00000061436	Hipk2	3029.09	3460.82	2597.36	0.750505	-0.414066	2.59e-05	0.00386999
ENSMUSG00000027379	Bub1	1311.34	1084.19	1538.5	1.41903	0.50491	2.62e-05	0.00388358
ENSMUSG00000078164	Gm4392	95.5161	124.215	66.8171	0.537914	-0.894553	2.95e-05	0.00433516
ENSMUSG00000031125	3830403N18Rik	143.075	105.508	180.643	1.71213	0.775793	3.3e-05	0.00482617
ENSMUSG00000022893	Adamts1	6666.14	7839.97	5492.31	0.700553	-0.513434	3.43e-05	0.00497309
ENSMUSG00000088609		179.743	128.487	230.999	1.79784	0.846268	3.45e-05	0.00497309
ENSMUSG00000029910	Mad2l1	1917.06	1606.9	2227.22	1.38604	0.470965	3.52e-05	0.00504396
ENSMUSG00000028195	Cyr61	4086.22	4729.44	3443.01	0.727996	-0.457997	3.81e-05	0.00542221
ENSMUSG00000040274	Cdk6	958.921	1113.62	804.217	0.722162	-0.469605	3.88e-05	0.00548628
ENSMUSG00000094410	Zbed6	3442.71	3848.08	3037.33	0.78931	-0.341336	3.99e-05	0.00560887
ENSMUSG00000050700	Emilin3	48.3945	28.3696	68.4194	2.41172	1.27006	4.14e-05	0.00578514
ENSMUSG00000020672	Sntg2	67.1543	42.4876	91.8211	2.16113	1.11178	4.37e-05	0.00584675
ENSMUSG00000021965	F630043A04Rik	525.142	427.899	622.386	1.45452	0.54054	4.36e-05	0.00584675
ENSMUSG00000036777	Anln	3703.53	3130.47	4276.59	1.36612	0.450081	4.35e-05	0.00584675
ENSMUSG00000037868	Egr2	180.193	226.697	133.69	0.58973	-0.761873	4.33e-05	0.00584675
ENSMUSG00000038379	Ttk	660.21	536.908	783.513	1.4593	0.54528	4.35e-05	0.00584675
ENSMUSG00000042453	Reln	386.904	466.401	307.407	0.659105	-0.601419	4.29e-05	0.00584675
ENSMUSG00000067276	Capn6	577.549	469.198	685.899	1.46185	0.5478	4.24e-05	0.00584675
ENSMUSG00000074476	Spc24	815.698	672.679	958.717	1.42522	0.511188	4.52e-05	0.00600312
ENSMUSG00000045613	Chrm2	5488.23	6301.78	4674.68	0.741803	-0.430892	4.99e-05	0.00658853
ENSMUSG00000029862	Clcn1	296.634	359.507	233.762	0.650229	-0.62098	5.29e-05	0.00694446
ENSMUSG00000030616	Sytl2	802.01	657.104	946.916	1.44105	0.527115	5.43e-05	0.00704472
ENSMUSG00000039477	Tnrc18	3083.04	3529.46	2636.61	0.747028	-0.420766	5.41e-05	0.00704472
ENSMUSG00000030787	Lyve1	553.563	657.651	449.474	0.683454	-0.549084	5.5e-05	0.00709674
ENSMUSG00000038943	Prc1	4807.44	4086.59	5528.3	1.35279	0.435939	5.83e-05	0.00747169
ENSMUSG00000038173	Enpp6	321.098	386.08	256.117	0.663378	-0.592098	6.05e-05	0.00771003
ENSMUSG00000044201	Cdc25c	437.014	355.315	518.714	1.45987	0.54584	6.37e-05	0.00807375
ENSMUSG00000062808	Hist1h3d	44.8637	25.6199	64.1075	2.50226	1.32323	6.68e-05	0.00841636
ENSMUSG00000090942	F830016B08Rik	65.1491	85.0668	45.2313	0.531715	-0.911274	6.95e-05	0.00870763
ENSMUSG00000081448	Gm13086	520.959	637.493	404.424	0.634397	-0.656542	7.01e-05	0.00873719
ENSMUSG00000015090	Ptgds	3048.95	2601.29	3496.62	1.34418	0.426731	7.14e-05	0.00884328
ENSMUSG00000022032	Scara5	1146.77	1345.5	948.052	0.704612	-0.5051	7.25e-05	0.00893504
ENSMUSG00000027306	Nusap1	1827.87	1542.24	2113.5	1.37041	0.454604	7.36e-05	0.00900942
ENSMUSG00000040204	2810417H13Rik	1816.2	1526.41	2105.98	1.37969	0.464348	7.56e-05	0.00920481
ENSMUSG00000051517	E130306D19Rik	588.91	485.508	692.311	1.42595	0.511926	7.61e-05	0.00921386
ENSMUSG00000027750	Postn	69931.7	59490	80373.4	1.35104	0.43407	7.81e-05	0.00940462
ENSMUSG00000020593	Lpin1	7145.29	8201.77	6088.81	0.742378	-0.429773	8.16e-05	0.00972707
ENSMUSG00000035948	Acss3	211.138	256.514	165.763	0.646212	-0.629921	8.13e-05	0.00972707
ENSMUSG00000015312	Gadd45b	331.937	263.762	400.112	1.51694	0.601167	8.48e-05	0.0100543
ENSMUSG00000024640	Psat1	1288.91	1079.56	1498.26	1.38785	0.47285	9.02e-05	0.0106366
ENSMUSG00000032783	Troap	709.546	590.566	828.525	1.40293	0.488448	9.23e-05	0.0108228
ENSMUSG00000034342	Cbl	1447.84	1635.53	1260.14	0.770477	-0.376177	9.44e-05	0.0110086
ENSMUSG00000056071	S100a9	186.358	142.734	229.981	1.61126	0.688185	9.62e-05	0.0111607
ENSMUSG00000026315	Serpinb8	297.238	236.185	358.291	1.51699	0.601214	0.000101614	0.0117247
ENSMUSG00000031756	Cenpn	771.751	638.976	904.527	1.41559	0.501402	0.00010227	0.0117386
ENSMUSG00000043415	Otud1	2471.72	2878.12	2065.32	0.717591	-0.478766	0.000104726	0.0119579
ENSMUSG00000055148	Klf2	4949.6	5751.37	4147.82	0.721189	-0.471552	0.000105772	0.0120147
ENSMUSG00000091345	Col6a5	24.859	11.7668	37.9513	3.22528	1.68942	0.000106349	0.012018
ENSMUSG00000020061	Mybpc1	51.9747	32.5424	71.407	2.19428	1.13375	0.000108107	0.012154
ENSMUSG00000028341	Nr4a3	953.31	1148.34	758.283	0.660332	-0.598736	0.000110512	0.012361
ENSMUSG00000029223	Uchl1	1591.57	1351.02	1832.12	1.35611	0.43947	0.000119626	0.0133125
ENSMUSG00000074802	Gas2l3	1156.77	970.917	1342.62	1.38283	0.467627	0.000120754	0.0133701
ENSMUSG00000020914	Top2a	8716.29	7460.06	9972.52	1.33679	0.418771	0.000125673	0.0137756
ENSMUSG00000029368	Alb	12.8921	4.90279	20.8814	4.25909	2.09054	0.000125127	0.0137756
ENSMUSG00000092837		187.208	141.546	232.87	1.64519	0.718256	0.000127537	0.0139104
ENSMUSG00000003032	Klf4	4693.93	5451.43	3936.43	0.722091	-0.469747	0.000128906	0.0139901
ENSMUSG00000031292	Cdkl5	189.652	228.871	150.433	0.657284	-0.605411	0.00013753	0.0148289
ENSMUSG00000041741	Pde3a	3415.08	3868.25	2961.92	0.765699	-0.385152	0.000137987	0.0148289
ENSMUSG00000037313	Tacc3	2540.51	2168.5	2912.52	1.3431	0.425569	0.00013931	0.014898
ENSMUSG00000030677	Kif22	1610.05	1368.78	1851.33	1.35254	0.435671	0.000141299	0.0150373
ENSMUSG00000036181	Hist1h1c	3812.81	3259.84	4365.78	1.33926	0.421438	0.000144248	0.0152771
ENSMUSG00000090582	Gm17024	228.161	273.954	182.367	0.665685	-0.587088	0.00014798	0.0155969
ENSMUSG00000027254	Mtap1a	2125.59	1793.91	2457.26	1.36978	0.453943	0.000155419	0.0163026
ENSMUSG00000067158	Col4a4	494.298	575.076	413.519	0.719069	-0.475797	0.000157876	0.0164815
ENSMUSG00000082884	Gm13339	47820.2	54427.7	41212.8	0.757202	-0.401249	0.000160195	0.0166444
ENSMUSG00000031262	Cenpi	811.194	681.354	941.034	1.38112	0.465843	0.000167109	0.0172808
ENSMUSG00000024989	Cep55	1270.09	1078.23	1461.95	1.35589	0.439237	0.000168986	0.0173929
ENSMUSG00000025019	Lcor	586.801	666.517	507.085	0.760798	-0.394414	0.000172468	0.0176683
ENSMUSG00000030672	Mylpf	152.17	114.198	190.143	1.66503	0.73555	0.000175481	0.01789
ENSMUSG00000034311	Kif4	1915.73	1634.94	2196.51	1.34348	0.425976	0.000176264	0.01789
ENSMUSG00000079553	Kifc1	1550.48	1318.19	1782.77	1.35244	0.435563	0.000186897	0.0188818
ENSMUSG00000056271	Lman1l	35.8136	20.577	51.0503	2.48094	1.31089	0.000191064	0.0192142
ENSMUSG00000020808	Fam64a	1325.66	1125.03	1526.28	1.35666	0.440054	0.000200058	0.0200268
ENSMUSG00000079065	BC005561	683.041	772.153	593.928	0.769185	-0.378598	0.000211077	0.0210338
ENSMUSG00000032400	Zwilch	1019.4	858.059	1180.75	1.37607	0.460553	0.000218931	0.0217178
ENSMUSG00000073418	C4b	144.691	111.726	177.656	1.5901	0.669119	0.000230531	0.0227654
ENSMUSG00000027323	Rad51	981.042	826.755	1135.33	1.37324	0.45758	0.000239522	0.0235473
ENSMUSG00000039137	Whrn	1600.5	1834.61	1366.39	0.744784	-0.425106	0.000248262	0.0242976
ENSMUSG00000038193	Hand2	3749.03	4319.37	3178.7	0.735916	-0.442386	0.000250671	0.0244243
ENSMUSG00000020256	Aldh1l2	2235.23	2552.92	1917.54	0.751118	-0.412889	0.000260109	0.0252318
ENSMUSG00000024798	Htr7	38.0573	53.7014	22.4132	0.417368	-1.26061	0.000264696	0.0253982
ENSMUSG00000030401	Rtn2	3576.43	4092.28	3060.58	0.747891	-0.419101	0.000263864	0.0253982
ENSMUSG00000045999	AY036118	2667.24	2262.6	3071.88	1.35768	0.441139	0.000265707	0.0253982
ENSMUSG00000068794	Col28a1	224.236	268.997	179.474	0.667199	-0.58381	0.00026646	0.0253982
ENSMUSG00000078185	Chml	434.885	499.294	370.475	0.741999	-0.430511	0.000267746	0.0254103
ENSMUSG00000075014	Gm10800	404.873	468.512	341.234	0.728335	-0.457326	0.000269752	0.0254904
ENSMUSG00000001986	Gria3	519.064	423.802	614.327	1.44956	0.535617	0.000276906	0.0260541
ENSMUSG00000012443	Kif11	3213.45	2759.27	3667.62	1.3292	0.410558	0.000283234	0.0265357
ENSMUSG00000022021	Diap3	1004.5	851.539	1157.46	1.35926	0.442824	0.000284745	0.0265637
ENSMUSG00000087651	1500009L16Rik	410.743	339.551	481.935	1.41933	0.505208	0.00028834	0.026785
ENSMUSG00000016756	Cmah	388.947	459.182	318.713	0.694087	-0.526811	0.000291968	0.0270076
ENSMUSG00000008658	Rbfox1	2208.33	2524.04	1892.63	0.749841	-0.415344	0.000309648	0.0284034
ENSMUSG00000046341	Gm11223	2829.49	2440.54	3218.45	1.31874	0.399164	0.000309431	0.0284034
ENSMUSG00000020098	Pcbd1	372.806	308.892	436.721	1.41383	0.499611	0.000311681	0.0284708
ENSMUSG00000056174	Col8a2	304.855	244.412	365.297	1.49459	0.579753	0.000322078	0.0292984
ENSMUSG00000068101	Cenpm	379.242	311.938	446.547	1.43152	0.517552	0.000333618	0.0302227
ENSMUSG00000074971	Fibin	1173.63	988.946	1358.32	1.3735	0.457858	0.000346515	0.0312619
ENSMUSG00000050556	Kcnb1	2245.07	2540.57	1949.57	0.767376	-0.381995	0.000349733	0.0314229
ENSMUSG00000022309	Angpt1	1033.62	1181.82	885.413	0.749192	-0.416592	0.000358333	0.031791
ENSMUSG00000043366	Olfr78	780.117	898.108	662.126	0.737246	-0.439782	0.000360377	0.031791
ENSMUSG00000049907	Rasl11b	3536.19	3011.05	4061.34	1.34881	0.43169	0.00036108	0.031791
ENSMUSG00000056328	Myh1	24.0156	12.2537	35.7776	2.91975	1.54584	0.000360941	0.031791
ENSMUSG00000067818	Myl9	12465.6	10798.6	14132.6	1.30874	0.388183	0.00035712	0.031791
ENSMUSG00000031762	Mt2	163.444	128.445	198.444	1.54497	0.627579	0.000366838	0.0320406
ENSMUSG00000040084	Bub1b	2390.1	2061.12	2719.09	1.31923	0.399694	0.00036606	0.0320406
ENSMUSG00000082286	Pisd-ps1	2015.58	2272.66	1758.5	0.773766	-0.370031	0.000385122	0.0335041
ENSMUSG00000087259	2610035D17Rik	362.874	423.137	302.612	0.715162	-0.483659	0.000407477	0.0353088
ENSMUSG00000042793	Lgr6	2545.53	2883.14	2207.91	0.765799	-0.384962	0.000411709	0.035535
ENSMUSG00000069041	Slc25a31	51.3759	35.0031	67.7487	1.9355	0.952709	0.000428367	0.0368278
ENSMUSG00000024298	Zfp871	1640.14	1805.24	1475.04	0.817089	-0.291435	0.000438144	0.0374156
ENSMUSG00000024678	Ms4a4d	205.318	246.73	163.906	0.66431	-0.590071	0.000438618	0.0374156
ENSMUSG00000019773	Fbxo5	814.959	688.423	941.495	1.36761	0.451658	0.000440942	0.0374681
ENSMUSG00000019992	Fam54a	308.232	251.41	365.055	1.45203	0.53807	0.000448672	0.0375034
ENSMUSG00000025912	Mybl1	679.96	570.482	789.438	1.38381	0.468645	0.000453332	0.0375034
ENSMUSG00000028037	Ifi44	226.886	180.881	272.891	1.50868	0.593283	0.000450342	0.0375034
ENSMUSG00000028957	Per3	5062.82	5694	4431.63	0.778299	-0.361604	0.000452854	0.0375034
ENSMUSG00000033196	Myh2	27.5189	15.1544	39.8835	2.63181	1.39606	0.000445615	0.0375034
ENSMUSG00000035455	Fignl1	1124.7	956.739	1292.66	1.35111	0.434143	0.000449812	0.0375034
ENSMUSG00000058626	Capn11	174.332	204.97	143.694	0.70105	-0.512411	0.000443551	0.0375034
ENSMUSG00000001131	Timp1	805.078	680.485	929.67	1.36619	0.450155	0.000456648	0.0376357
ENSMUSG00000027445	Cst9	13.0419	5.84879	20.235	3.45969	1.79064	0.000460699	0.0378274
ENSMUSG00000021391	Cenpp	572.165	481.837	662.494	1.37494	0.459365	0.000476669	0.0387038
ENSMUSG00000039814	Xkr5	293.228	240.98	345.476	1.43363	0.519673	0.000475409	0.0387038
ENSMUSG00000056054	S100a8	103.886	77.7395	130.033	1.67268	0.742159	0.000476096	0.0387038
ENSMUSG00000018102	Hist1h2bc	2419.54	2095.99	2743.09	1.30873	0.388169	0.000497943	0.0401339
ENSMUSG00000023795	Pisd-ps2	360.687	420.095	301.279	0.717169	-0.479614	0.000497076	0.0401339
ENSMUSG00000031253	Srpx2	1050.24	888.323	1212.16	1.36455	0.448422	0.000506086	0.0406408
ENSMUSG00000072620	Slfn2	302.662	246.197	359.127	1.4587	0.544685	0.000513518	0.0410871
ENSMUSG00000047415	Gpr68	114.743	86.8722	142.613	1.64164	0.715141	0.000525447	0.0418886
ENSMUSG00000092341	Malat1	129526	144810	114242	0.788912	-0.342063	0.000528257	0.0419601
ENSMUSG00000087014	Gm16364	97.6748	121.583	73.7664	0.606716	-0.720906	0.000530502	0.0419863
ENSMUSG00000007682	Dio2	604.885	503.306	706.464	1.40365	0.48918	0.00054241	0.0427743
ENSMUSG00000035694	Caps2	375.78	432.648	318.911	0.737114	-0.44004	0.000547306	0.0430057
ENSMUSG00000034906	Ncaph	1857.44	1603.82	2111.06	1.31627	0.396456	0.000557807	0.0436743
ENSMUSG00000002055	Spag5	2036.01	1761.71	2310.31	1.3114	0.39111	0.00056229	0.0438686
ENSMUSG00000026429	Ube2t	698.104	594.245	801.963	1.34955	0.432477	0.00057484	0.0446887
ENSMUSG00000048574	Gm5593	251.538	205.081	297.995	1.45306	0.539096	0.000577464	0.0447341
ENSMUSG00000027004	Frzb	563.194	473.44	652.947	1.37915	0.463784	0.000590773	0.045604
ENSMUSG00000026062	Slc9a2	149.485	184.707	114.262	0.618614	-0.692889	0.000601141	0.046171
ENSMUSG00000078521	2610002D18Rik	137.041	105.889	168.193	1.5884	0.667574	0.000602331	0.046171
ENSMUSG00000025001	Hells	1229.77	1044.35	1415.18	1.35509	0.438386	0.000615189	0.0469923
ENSMUSG00000075266	Cenpw	293.69	242.564	344.816	1.42155	0.507462	0.000617436	0.0470002
ENSMUSG00000030110	Ret	1029.98	1182.55	877.419	0.741972	-0.430564	0.00062329	0.0472816
ENSMUSG00000001027	Scn4a	704.103	809.037	599.17	0.740597	-0.43324	0.000629417	0.0475818
ENSMUSG00000053199	Arhgap20	1091.15	1250.96	931.335	0.744495	-0.425666	0.000632248	0.0476315
ENSMUSG00000067336	Bmpr2	1493.64	1655.21	1332.08	0.804776	-0.31334	0.000643817	0.048337
ENSMUSG00000006715	Gmnn	1930.24	1682.24	2178.24	1.29485	0.372784	0.000652821	0.0488457
ENSMUSG00000027820	Mme	426.329	495.675	356.982	0.720194	-0.473543	0.000665528	0.0496271
